# Supplementary material for: Whole Cancer Cell Vaccine Protects Ovarian Functions in Tumor-bearing Mice through Downregulating CXCL10
Source: Research Square preprint supplement (doi:10.21203/rs.3.rs-3838016/v1), 2024-10-02
Supplement: Supplementary file 1 [file 415cbb67bd63e4532cb8e0e8.xlsx]

## Sheet: Summary
MILLIPLEX Analyst Detail Report
Summary
Analyte Sample	MIP-3alpha/CCL20	IL-1beta	ENA-78/CXCL5	TNF-alpha	GM-CSF	Fractalkine/CX3CL	I-309/CCL1	BCA-1/CXCL13	IL-16	IFN-gamma	IP-10/CXCL10	IL-2	I-TAC/CXCL11	IL-6	IL-4	MCP-3/CCL7	MCP-5/CCL12	MCP-1/CCL2	MDC/CCL22	RANTES/CCL5	IL-10	KC/CXCL1	CTACK/CCL27	TARC/CCL17	MIP-3beta/CCL19	SCYB16/CXCL16	SDF-1alpha/CXCL12	Eotaxin-2/CCL24	Eotaxin/CCL11	MIP-1beta/CCL4	MIP-1alpha/CCL3
	pg/ml	pg/ml	pg/ml	pg/ml	pg/ml	pg/ml	pg/ml	pg/ml	pg/ml	pg/ml	pg/ml	pg/ml	pg/ml	pg/ml	pg/ml	pg/ml	pg/ml	pg/ml	pg/ml	pg/ml	pg/ml	pg/ml	pg/ml	pg/ml	pg/ml	pg/ml	pg/ml	pg/ml	pg/ml	pg/ml	pg/ml
C8	99.78	313.23	11398	295.72	17.35	261.03	28.3	2599	359.83	162.22	5734	7.84	3741	38.8	75.52	108.88	32.12	694.68	368.3	86.9	982.03	583.99	1496	513.13	2220	261.31	2672	16622	1519	117.26	37.94
C10	72.71	419.93	8733	516.9	26.74	339.14	41.92	2927	743.18	227.57	7372	13.87	5301	67.82	115.28	186.15	61.33	882.49	490.21	103.27	1722	666.06	2029	981.73	2939	430.59	2643	17065	1498	155.63	46.82
C12	68.29	409.33	15040	454.95	20.83	295.52	66.96	3981	423.15	159.95	7111	11.39	4697	56.44	107.67	197.01	61.76	857.93	409.94	55.47	1512	605.04	1894	354.38	2583	404.78	2327	19295	1598	137.7	39.05
C13	66.34	354.88	8783	383.47	20.61	315.18	49.8	2967	693.86	196.77	5940	11.94	4510	61.05	95.43	221.56	67.91	817.35	402.64	101.17	1272	586.34	1710	793.77	2437	415.79	2598	21100	1563	146.57	38.75
C14	123.57	437.41	7622	491.49	22.67	327.91	42.72	2414	751.19	220.51	6809	15.67	5443	67.19	112.38	206.34	54.15	849.93	460.85	122.61	1148	683.11	2051	960.13	2733	389.23	2789	17691	1640	162.57	45.3
M15	65.36	526.42	9266	592.34	27.99	440.93	83.86	2760	936.99	219.54	13400	25.57	6789	87.27	109.45	538.59	140	994.64	430.09	135.64	1566	735.47	4072	856.86	3586	456.89	3252	15390	1287	174.25	49.77
M18	76.99	594.9	6321	698.2	33.71	445.19	93.67	3082	1060	271.73	15887	34.27	7190	116.61	166.02	488.42	122.04	988.25	388.13	297.49	2096	775.04	4550	812.44	3750	402.63	3331	14489	1247	195.6	52.88
M19	57.88	532.92	6060	520.52	27.12	380.98	15.06	2020	876.05	210.75	11733	21.26	6605	79.31	121.52	565.93	34.08	1025	338.09	176.02	1630	685.94	2847	762.29	3327	484.86	2956	11999	1429	174.03	47.35
M20	71.46	583.95	5884	694.7	32.1	500.66	90.68	2316	1010	252.01	13727	30.21	7514	125.42	156.24	609.89	155.74	985.84	288.87	313.21	2148	727.63	3349	767.5	3739	530.32	3022	13407	1474	190.17	51.88
M21	38.78	387.85	5900	309.61	13.57	369.3	64.56	2316	862.78	125.78	9416	15.88	4579	70.63	103.77	620.79	147.64	728.3	313.93	298.41	1350	456.47	2161	469.78	2398	491.74	2349	12962	1201	122.68	27.5
V3	64.37	384.23	8627	522.93	24.88	332.93	77.02	3800	882.03	213.68	8091	15.67	5521	76.07	120.4	304.84	76.69	848.14	430.34	167.66	1880	613.76	2532	967.95	2859	275.45	2936	13297	1160	166.66	46.82
V4	82.03	409.33	5224	371.03	20.5	291.5	49.54	3129	168.98	220.51	7209	16.14	3815	55.01	113.83	311.73	82.2	745.17	444.76	198.28	1464	687.64	2062	882.8	3197	45.27	2792	12955	1080	126.13	38.95
V5	59.97	311.3	17040	378.5	15.75	261.03	21.79	2359	818.38	222.95	5561	10.41	3628	52.28	81.05	199.16	18.28	839.17	416.79	138.28	1223	638.01	2073	947.48	2327	265.36	2994	12150	1184	123.48	42.99
V6	47.55	320.93	10014	445.16	19.71	304.78	49.54	3932	681.16	182.43	7011	14.09	4320	61.84	97.94	104.38	51.64	741.23	280.85	155.8	1557	556.81	1802	508.15	1646	410.72	2537	6911	683	131.6	36.62
V7	68.29	387.85	11515	551.77	26.03	372.83	35.06	2967	770.98	206.83	8212	9.07	6317	91.22	117.57	273.67	60.94	913.35	437.53	152.15	1657	694.99	2204	658.79	2997	377.15	3011	12475	1180	176.66	50.44
P23	74.87	437.41	6787	580.44	22.28	352.59	96.41	3343	920.86	236.06	13444	20.81	5093	84.83	142.54	453.86	89.99	976.99	446.01	221.31	1973	663.21	3273	717.97	2918	245.79	2821	14656	1284	149.46	50.54
P25	80.27	475.05	5929	551.77	21.78	317.75	87.46	2865	814.6	230.24	11275	23.5	5077	67.19	127.35	436.33	100.59	882.49	372.82	188.28	1005	621.87	3121	675.79	2997	206.97	2769	16641	1313	154.22	43.04
P26	55.4	362.29	6796	416.88	19.15	310.01	75.41	12510	776.19	185.9	12134	14.41	3138	58.99	105.28	552.75	135.02	897.16	344.04	221.76	1679	576.93	2686	627.79	2537	287.98	2568	10568	1418	149.46	42.74
P28	67.32	416.41	9270	534.97	20.5	279.26	56.74	2972	796.83	231.7	8553	12.8	4214	72.65	79.68	408.56	94.67	768.51	428.85	165.99	2093	685.94	1894	917.69	3712	81.46	3046	16507	1835	135.17	46.96
P29	67.97	521.53	8518	688.87	30.05	414.88	56.37	3681	964.23	271.01	11970	22.51	6746	92.73	149.97	706.99	71.19	1171	451.02	260.38	2221	792.23	2386	983.7	3473	375.87	3479	13095	2083	196.84	57.09
Notes:
Red-higher than maxDC, Black-Lower than minDC, Blue-between maxDC and minDC;
NAN-Curve Fitting Failed; N/A-Data marked out; ND-missing original data

## Sheet: Curves
MILLIPLEX Analyst Detail Report
4-P.log(2.48, 10.11, 0.76, 4.39)
			4-P.log(2.51, 10.03, 0.68, 6.64)
DC=(1.16, 7945) Chi = 0.099%			DC=(3.37, 404829) Chi = 0.018%
4-P.log(2.55, 9.21, 0.84, 7.19)
			4-P.log(3.37, 10.73, 0.57, 7.11)
DC=(19.68, 149210) Chi = 0.054%			DC=(2.06, 101592) Chi = 0.030%
4-P.log(2.39, 10.40, 0.51, 3.45)
			4-P.log(2.17, 9.30, 0.81, 5.91)
DC=(0.13, 12745) Chi = 0.030%			DC=(12.28, 168683) Chi = 0.099%
4-P.log(2.87, 9.68, 0.68, 4.15)
			4-P.log(2.44, 10.25, 0.76, 6.98)
DC=(0.75, 6097) Chi = 0.078%			DC=(3.42, 21110) Chi = 0.054%
4-P.log(3.02, 10.31, 0.86, 6.82)
			4-P.log(3.22, 9.78, 0.63, 5.09)
DC=(4.61, 79379) Chi = 0.039%			DC=(0.83, 81832) Chi = 0.023%
4-P.log(3.47, 9.28, 1.02, 9.04)
			4-P.log(2.11, 10.84, 0.50, 3.43)
DC=(64.27, 239190) Chi = 0.029%			DC=(0.17, 20849) Chi = 0.018%
4-P.log(2.99, 9.17, 0.88, 8.75)
			4-P.log(3.16, 10.46, 0.57, 4.87)
DC=(5.84, 152640) Chi = 0.023%			DC=(0.58, 46440) Chi = 0.028%
4-P.log(2.81, 9.63, 0.80, 4.90)
			4-P.log(3.79, 9.30, 0.73, 4.10)
DC=(2.02, 13491) Chi = 0.071%			DC=(0.21, 7768) Chi = 0.027%
4-P.log(1.61, 10.50, 0.43, 2.11)
			4-P.log(2.81, 9.70, 0.94, 6.39)
DC=(0.13, 19896) Chi = 0.014%			DC=(6.04, 328969) Chi = 0.020%
4-P.log(3.59, 9.71, 0.64, 4.41)
			4-P.log(2.86, 10.42, 0.63, 4.01)
DC=(0.17, 13437) Chi = 0.024%			DC=(0.70, 28421) Chi = 0.034%
4-P.log(3.23, 9.58, 0.81, 7.41)
			4-P.log(2.71, 8.98, 0.82, 5.59)
DC=(9.72, 475601) Chi = 0.026%			DC=(5.26, 74636) Chi = 0.040%
4-P.log(2.42, 10.68, 0.63, 8.62)
			4-P.log(-1.51, 9.62, 0.28, 2.45)
DC=(27.66, 777189) Chi = 0.070%			DC=(4.75, 133042) Chi = 0.10%
4-P.log(2.61, 9.27, 0.78, 7.44)
			4-P.log(2.72, 10.33, 0.59, 3.30)
DC=(10.58, 96597) Chi = 0.034%			DC=(0.11, 15804) Chi = 0.015%
4-P.log(2.91, 9.14, 0.99, 7.41)
			4-P.log(2.96, 12.35, 0.58, 9.10)
DC=(34.99, 149656) Chi = 0.063%			DC=(4.46, 52875) Chi = 0.036%
4-P.log(2.85, 11.44, 0.59, 4.96)
			4-P.log(2.72, 9.74, 0.82, 4.88)
DC=(0.22, 5672) Chi = 0.041%			DC=(3.67, 149754) Chi = 0.035%
4-P.log(3.28, 10.11, 0.65, 3.69)
DC=(0.21, 10793) Chi = 0.040%
Notes: CV-The Coefficient of Variation of standard curve replicates at each dilution level. Chi-The Chi-Square test statistic of the distance between observed concentrations with expected concentrations.
Files Name: C:\...\xPONENT31\Output\20220923-pinban-mo31_20220923_181354.csv
Program: Milliplex Analyte
Application Version: 5.1.0.0
User Name: Administrator
Organization: UNIV				Signature:
Creation Time: 09/26/2022 15:05:05 中国标准时间				Date:

## Sheet: MIP-3alpha CCL20
MILLIPLEX Analyst Detail Report
	Analyte MIP-3alpha/CCL20
	4-P.log(2.48, 10.11, 0.76, 4.39)
	Chi=0.099%, CV=2.48%, R²=0.999, DC=(1.16, 7945)
		Expected pg/ml(i)		MFI(i)	pg/ml(i)		MFI		pg/ml	CV		Recovery
		0		16			15.5			4.56%
				15
		0.98		18	1.83		17.25		1.57	6.15%		160.43%
				16.5	1.31
		3.93		23	3.56		21.5		3.05	9.87%		77.53%
				20	2.53
		15.74		60	14.23		61.5		14.6	3.45%		92.74%
				63	14.96
		62.95		444.5	70.33		442.25		70.08	0.72%		111.32%
				440	69.83
		251.81		2376	237.06		2389		238.07	0.74%		94.54%
				2402	239.09
		1007		8495	890.37		8554		899.25	0.97%		89.28%
				8612	908.21
		4029		18154	5386		18162		5397	0.07%		133.96%
				18171	5409
Notes: CV-The Coefficient of Variation of standard curve replicates at each dilution level. Chi-The Chi-Square test statistic of the distance between observed concentrations with expected concentrations.
Samples:
Sample						MFI(i)		pg/ml(i)			MFI		pg/ml			CV
C8						272.5		49.89			272.5		99.78			0%
C10						177		36.36			177		72.71			0%
C12						163		34.14			163		68.29			0%
C13						157		33.17			157		66.34			0%
C14						369		61.79			369		123.57			0%
M15						154		32.68			154		65.36			0%
M18						191		38.5			191		76.99			0%
M19						132		28.94			132		57.88			0%
M20						173		35.73			173		71.46			0%
M21						82.5		19.39			82.5		38.78			0%
V3						151		32.18			151		64.37			0%
V4						208		41.01			208		82.03			0%
V5						138		29.99			138		59.97			0%
V6						104		23.78			104		47.55			0%
V7						163		34.14			163		68.29			0%
P23						184		37.43			184		74.87			0%
P25						202		40.13			202		80.27			0%
P26						125		27.7			125		55.4			0%
P28						160		33.66			160		67.32			0%
P29						162		33.98			162		67.97			0%
Notes: Red-higher than maxDC, Black-Lower than minDC, Blue-between maxDC and minDC; NAN-Curve Fitting Failed; N/A-Data marked out; ND-missing original data

## Sheet: IL-1beta
MILLIPLEX Analyst Detail Report
	Analyte IL-1beta
	4-P.log(2.51, 10.03, 0.68, 6.64)
	Chi=0.018%, CV=0.41%, R²=1, DC=(3.37, 404829)
		Expected pg/ml(i)		MFI(i)	pg/ml(i)		MFI		pg/ml	CV		Recovery
		0		15			15			0%
				15
		18.35		23	21.86		21.5		18.19	9.87%		99.16%
				20	14.59
		73.38		45.5	76		44.25		73.13	3.99%		99.66%
				43	70.24
		293.52		159	286.46		167		299.01	6.77%		101.87%
				175	311.36
		1174		877	1141		879		1143	0.32%		97.33%
				881	1145
		4696		4060	4617		4222		4825	5.43%		102.73%
				4384	5037
		18786		10454	18863		10448		18841	0.08%		100.29%
				10442	18818
		75142		16274	73088		16249		72579	0.21%		96.59%
				16225	72075
Notes: CV-The Coefficient of Variation of standard curve replicates at each dilution level. Chi-The Chi-Square test statistic of the distance between observed concentrations with expected concentrations.
Samples:
Sample						MFI(i)		pg/ml(i)			MFI		pg/ml			CV
C8						84		156.62			84		313.23			0%
C10						113		209.97			113		419.93			0%
C12						110		204.67			110		409.33			0%
C13						95		177.44			95		354.88			0%
C14						118		218.7			118		437.41			0%
M15						144.5		263.21			144.5		526.42			0%
M18						166		297.45			166		594.9			0%
M19						146.5		266.46			146.5		532.92			0%
M20						162.5		291.97			162.5		583.95			0%
M21						104		193.93			104		387.85			0%
V3						103		192.12			103		384.23			0%
V4						110		204.67			110		409.33			0%
V5						83.5		155.65			83.5		311.3			0%
V6						86		160.46			86		320.93			0%
V7						104		193.93			104		387.85			0%
P23						118		218.7			118		437.41			0%
P25						129		237.53			129		475.05			0%
P26						97		181.15			97		362.29			0%
P28						112		208.2			112		416.41			0%
P29						143		260.76			143		521.53			0%
Notes: Red-higher than maxDC, Black-Lower than minDC, Blue-between maxDC and minDC; NAN-Curve Fitting Failed; N/A-Data marked out; ND-missing original data

## Sheet: ENA-78 CXCL5
MILLIPLEX Analyst Detail Report
	Analyte ENA-78/CXCL5
	4-P.log(2.55, 9.21, 0.84, 7.19)
	Chi=0.054%, CV=1.41%, R²=1, DC=(19.68, 149210)
		Expected pg/ml(i)		MFI(i)	pg/ml(i)		MFI		pg/ml	CV		Recovery
		0		15			15			0%
				15
		18.48		17	31.34		16.5		27.22	4.29%		147.3%
				16	23.12
		73.91		20	55.97		20.5		60.02	3.45%		81.21%
				21	64.05
		295.64		52	271.33		55.5		290.85	8.92%		98.38%
				59	309.84
		1183		320	1222		325		1236	2.18%		104.49%
				330	1249
		4730		1685	4427		1760		4607	5.99%		97.4%
				1834	4790
		18921		4934	16955		4973		17213	1.12%		90.97%
				5012	17474
		75685		8340	94425		8416		100449	1.27%		132.72%
				8492	107133
Notes: CV-The Coefficient of Variation of standard curve replicates at each dilution level. Chi-The Chi-Square test statistic of the distance between observed concentrations with expected concentrations.
Samples:
Sample						MFI(i)		pg/ml(i)			MFI		pg/ml			CV
C8						2189		5699			2189		11398			0%
C10						1660		4366			1660		8733			0%
C12						2824		7520			2824		15040			0%
C13						1670		4392			1671		8783			0%
C14						1424		3811			1425		7622			0%
M15						1770		4633			1770		9266			0%
M18						1140		3160			1141		6321			0%
M19						1083		3030			1083		6060			0%
M20						1044		2942			1044		5884			0%
M21						1048		2950			1047		5900			0%
V3						1638		4314			1638		8627			0%
V4						898		2612			898		5224			0%
V5						3132		8520			3132		17040			0%
V6						1921		5007			1921		10014			0%
V7						2211		5757			2211		11515			0%
P23						1243		3393			1243		6787			0%
P25						1054		2965			1054		5929			0%
P26						1245		3398			1245		6796			0%
P28						1771		4635			1771		9270			0%
P29						1615		4259			1615		8518			0%
Notes: Red-higher than maxDC, Black-Lower than minDC, Blue-between maxDC and minDC; NAN-Curve Fitting Failed; N/A-Data marked out; ND-missing original data

## Sheet: TNF-alpha
MILLIPLEX Analyst Detail Report
	Analyte TNF-alpha
	4-P.log(3.37, 10.73, 0.57, 7.11)
	Chi=0.030%, CV=0.72%, R²=1, DC=(2.06, 101592)
		Expected pg/ml(i)		MFI(i)	pg/ml(i)		MFI		pg/ml	CV		Recovery
		0		45.5			42.25			10.88%
				39
		6.81		44	8.97		43		8.08	3.29%		118.59%
				42	7.21
		27.25		61.5	27.48		58.75		24.33	6.62%		89.27%
				56	21.24
		109.02		117.5	97.53		124.25		106.17	7.68%		97.39%
				131	114.8
		436.06		414.5	453.81		413.75		452.96	0.26%		103.88%
				413	452.12
		1744		1648	1729		1673		1754	2.09%		100.54%
				1698	1779
		6977		6081	6744		6038		6687	1.02%		95.84%
				5994	6629
		27908		16226	29068		16188		28935	0.33%		103.68%
				16150	28803
Notes: CV-The Coefficient of Variation of standard curve replicates at each dilution level. Chi-The Chi-Square test statistic of the distance between observed concentrations with expected concentrations.
Samples:
Sample						MFI(i)		pg/ml(i)			MFI		pg/ml			CV
C8						157		147.86			157		295.72			0%
C10						246.5		258.45			246.5		516.9			0%
C12						221		227.47			221		454.95			0%
C13						192		191.73			192		383.47			0%
C14						236		245.75			236		491.49			0%
M15						278		296.17			278		592.34			0%
M18						323		349.1			323		698.2			0%
M19						248		260.26			248		520.52			0%
M20						321.5		347.35			321.5		694.7			0%
M21						162.5		154.81			162.5		309.61			0%
V3						249		261.47			249		522.93			0%
V4						187		185.52			187		371.03			0%
V5						190		189.25			190		378.5			0%
V6						217		222.58			217		445.16			0%
V7						261		275.89			261		551.77			0%
P23						273		290.22			273		580.44			0%
P25						261		275.89			261		551.77			0%
P26						205.5		208.44			205.5		416.88			0%
P28						254		267.48			254		534.97			0%
P29						319		344.44			319		688.87			0%
Notes: Red-higher than maxDC, Black-Lower than minDC, Blue-between maxDC and minDC; NAN-Curve Fitting Failed; N/A-Data marked out; ND-missing original data

## Sheet: GM-CSF
MILLIPLEX Analyst Detail Report
	Analyte GM-CSF
	4-P.log(2.39, 10.40, 0.51, 3.45)
	Chi=0.030%, CV=0.70%, R²=1, DC=(0.13, 12745)
		Expected pg/ml(i)		MFI(i)	pg/ml(i)		MFI		pg/ml	CV		Recovery
		0		19.5			18.75			5.66%
				18
		0.65		28	0.62		28.5		0.65	2.48%		100%
				29	0.68
		2.59		61	2.53		61		2.53	0%		97.66%
				61	2.53
		10.38		201	10.64		206		10.92	3.43%		105.18%
				211	11.2
		41.5		752	39.59		749		39.44	0.57%		95.03%
				746	39.28
		166		2947	164.32		3006		168.13	2.76%		101.28%
				3064	171.97
		664		8360	694.74		8363		695.1	0.04%		104.68%
				8366	695.46
		2656		15372	2615		15194		2530	1.66%		95.25%
				15015	2448
Notes: CV-The Coefficient of Variation of standard curve replicates at each dilution level. Chi-The Chi-Square test statistic of the distance between observed concentrations with expected concentrations.
Samples:
Sample						MFI(i)		pg/ml(i)			MFI		pg/ml			CV
C8						166		8.67			166		17.35			0%
C10						250.5		13.37			250.5		26.74			0%
C12						197		10.42			197		20.83			0%
C13						195		10.31			195		20.61			0%
C14						213.5		11.33			213.5		22.67			0%
M15						262		14			262		27.99			0%
M18						315		16.85			315		33.71			0%
M19						254		13.56			254		27.12			0%
M20						300		16.05			300		32.1			0%
M21						133		6.78			133		13.57			0%
V3						233.5		12.44			233.5		24.88			0%
V4						194		10.25			194		20.5			0%
V5						152		7.88			152		15.75			0%
V6						187		9.86			187		19.71			0%
V7						244		13.01			244		26.03			0%
P23						210		11.14			210		22.28			0%
P25						205.5		10.89			205.5		21.78			0%
P26						182		9.58			182		19.15			0%
P28						194		10.25			194		20.5			0%
P29						281		15.03			281		30.05			0%
Notes: Red-higher than maxDC, Black-Lower than minDC, Blue-between maxDC and minDC; NAN-Curve Fitting Failed; N/A-Data marked out; ND-missing original data

## Sheet: Fractalkine CX3CL
MILLIPLEX Analyst Detail Report
	Analyte Fractalkine/CX3CL
	4-P.log(2.17, 9.30, 0.81, 5.91)
	Chi=0.099%, CV=2.41%, R²=0.998, DC=(12.28, 168683)
		Expected pg/ml(i)		MFI(i)	pg/ml(i)		MFI		pg/ml	CV		Recovery
		0		12			12.5			5.66%
				13
		12.83		15	16.8		15		16.8	0%		130.92%
				15	16.8
		51.32		24	39.89		24		39.89	0%		77.72%
				24	39.89
		205.28		146	217.25		152		223.65	5.58%		108.95%
				158	229.96
		821.12		948	819.47		957		825.43	1.33%		100.52%
				966	831.39
		3284		3510	2852		3643		2994	5.16%		91.17%
				3776	3142
		13138		7319	11840		7350		12002	0.59%		91.36%
				7380	12167
		52552		10222	112664		10254		119652	0.45%		227.68%
				10287	127434
Notes: CV-The Coefficient of Variation of standard curve replicates at each dilution level. Chi-The Chi-Square test statistic of the distance between observed concentrations with expected concentrations.
Samples:
Sample						MFI(i)		pg/ml(i)			MFI		pg/ml			CV
C8						75		130.52			75		261.03			0%
C10						104.5		169.57			104.5		339.14			0%
C12						87.5		147.76			87.5		295.52			0%
C13						95		157.59			95		315.18			0%
C14						100		163.96			100		327.91			0%
M15						149		220.47			149		440.93			0%
M18						151		222.59			151		445.19			0%
M19						122		190.49			122		380.98			0%
M20						178		250.33			178		500.66			0%
M21						117		184.65			117		369.3			0%
V3						102		166.47			102		332.93			0%
V4						86		145.75			86		291.5			0%
V5						75		130.52			75		261.03			0%
V6						91		152.39			91		304.78			0%
V7						118.5		186.41			118.5		372.83			0%
P23						110		176.29			110		352.59			0%
P25						96		158.87			96		317.75			0%
P26						93		155			93		310.01			0%
P28						81.5		139.63			81.5		279.26			0%
P29						137		207.44			137		414.88			0%
Notes: Red-higher than maxDC, Black-Lower than minDC, Blue-between maxDC and minDC; NAN-Curve Fitting Failed; N/A-Data marked out; ND-missing original data

## Sheet: I-309 CCL1
MILLIPLEX Analyst Detail Report
	Analyte I-309/CCL1
	4-P.log(2.87, 9.68, 0.68, 4.15)
	Chi=0.078%, CV=1.96%, R²=0.999, DC=(0.75, 6097)
		Expected pg/ml(i)		MFI(i)	pg/ml(i)		MFI		pg/ml	CV		Recovery
		0		23			23.5			3.01%
				24
		0.71		28	1.37		26.25		1.08	9.43%		152.17%
				24.5	0.81
		2.83		32	2.04		32		2.04	0%		72.15%
				32	2.04
		11.33		85	10.89		87.25		11.24	3.65%		99.24%
				89.5	11.59
		45.31		388	48.64		390.5		48.91	0.91%		107.96%
				393	49.19
		181.25		1636	175.24		1648		176.43	0.99%		97.34%
				1659	177.63
		725		5046	661.81		5000		652.55	1.31%		90.01%
				4954	643.39
		2900		10615	3638		10487		3476	1.73%		119.86%
				10359	3323
Notes: CV-The Coefficient of Variation of standard curve replicates at each dilution level. Chi-The Chi-Square test statistic of the distance between observed concentrations with expected concentrations.
Samples:
Sample						MFI(i)		pg/ml(i)			MFI		pg/ml			CV
C8						106.5		14.15			106.5		28.3			0%
C10						155		20.96			155		41.92			0%
C12						254.5		33.48			254.5		66.96			0%
C13						185		24.9			185		49.8			0%
C14						158		21.36			158		42.72			0%
M15						327.5		41.93			327.5		83.86			0%
M18						371.5		46.83			371.5		93.67			0%
M19						64		7.53			64		15.06			0%
M20						358		45.34			358		90.68			0%
M21						244.5		32.28			244.5		64.56			0%
V3						297.5		38.51			297.5		77.02			0%
V4						184		24.77			184		49.54			0%
V5						85		10.89			85		21.79			0%
V6						184		24.77			184		49.54			0%
V7						130		17.53			130		35.06			0%
P23						384		48.2			384		96.41			0%
P25						343.5		43.73			343.5		87.46			0%
P26						290.5		37.7			290.5		75.41			0%
P28						212.5		28.37			212.5		56.74			0%
P29						211		28.19			211		56.37			0%
Notes: Red-higher than maxDC, Black-Lower than minDC, Blue-between maxDC and minDC; NAN-Curve Fitting Failed; N/A-Data marked out; ND-missing original data

## Sheet: BCA-1 CXCL13
MILLIPLEX Analyst Detail Report
	Analyte BCA-1/CXCL13
	4-P.log(2.44, 10.25, 0.76, 6.98)
	Chi=0.054%, CV=1.70%, R²=0.999, DC=(3.42, 21110)
		Expected pg/ml(i)		MFI(i)	pg/ml(i)		MFI		pg/ml	CV		Recovery
		0		14			13.75			2.57%
				13.5
		2.44		14	8.66		13		4.58	10.88%		187.8%
				12	1.12
		9.75		14	8.66		14		8.66	0%		88.83%
				14	8.66
		39		20	36.14		20		36.14	0%		92.66%
				20	36.14
		156		46	142.66		47.75		148.9	5.18%		95.45%
				49.5	155.04
		624		279	661.82		281.75		666.37	1.38%		106.79%
				284.5	670.91
		2496		1752	2357		1751		2355	0.1%		94.37%
				1750	2354
		9984		8580	10343		8591		10358	0.16%		103.75%
				8600	10374
Notes: CV-The Coefficient of Variation of standard curve replicates at each dilution level. Chi-The Chi-Square test statistic of the distance between observed concentrations with expected concentrations.
Samples:
Sample						MFI(i)		pg/ml(i)			MFI		pg/ml			CV
C8						750.5		1300			750.5		2599			0%
C10						893		1463			893		2927			0%
C12						1388		1990			1388		3981			0%
C13						911		1484			911		2967			0%
C14						673		1207			673		2414			0%
M15						819.5		1380			819.5		2760			0%
M18						963		1541			963		3082			0%
M19						517		1010			517		2020			0%
M20						633		1158			633		2316			0%
M21						633		1158			633		2316			0%
V3						1300		1900			1300		3800			0%
V4						984		1564			984		3129			0%
V5						650.5		1180			650.5		2359			0%
V6						1364		1966			1364		3932			0%
V7						911		1484			911		2967			0%
P23						1083		1672			1083		3343			0%
P25						865.5		1432			865.5		2865			0%
P26						5537		6255			5537		12510			0%
P28						913		1486			913		2972			0%
P29						1243		1841			1243		3681			0%
Notes: Red-higher than maxDC, Black-Lower than minDC, Blue-between maxDC and minDC; NAN-Curve Fitting Failed; N/A-Data marked out; ND-missing original data

[truncated: 23 more sheets: IL-16, IFN-gamma, IP-10 CXCL10, IL-2, I-TAC CXCL11, IL-6, IL-4, MCP-3 CCL7, MCP-5 CCL12, MCP-1 CCL2, MDC CCL22, RANTES CCL5, IL-10, KC CXCL1, CTACK CCL27, TARC CCL17, MIP-3beta CCL19, SCYB16 CXCL16, SDF-1alpha CXCL12, Eotaxin-2 CCL24 …]
