# Supplementary material for: Whole Cancer Cell Vaccine Protects Ovarian Functions in Tumor-bearing Mice through Downregulating CXCL10
Source: Research Square preprint supplement (doi:10.21203/rs.3.rs-3838016/v1), 2024-10-02
Supplement: Supplementary file 2 [file 54437fc7eb25a5824036ea67.xlsx]

## Sheet: All_samples-fpkm
Geneid	Chr	Start	End	Strand	Length	VM1	VM2	VM3	CTR1	CTR2	CTR3	M1	M2	M3	PM1	PM2	PM3
H60c	10;10;10;10;10;10;10;10;10;10;10;10;10;10;10	3256208;3256208;3257930;3259272;3259272;3259709;3259709;3259709;3260235;3260235;3267241;3267241;3267646;3267646;3267646	3258200;3258200;3258200;3259409;3259409;3259972;3259972;3259972;3260420;3260420;3267350;3267350;3267771;3267750;3267771	-;-;-;-;-;-;-;-;-;-;-;-;-;-;-	2817	0	0	0	0	0	0	0	0.0160331	0	0.0608197	0	0
Ppp1r14c	10;10;10;10;10;10	3366057;3366544;3423494;3425734;3463389;3463389	3366969;3366969;3423577;3425766;3464975;3464975	+;+;+;+;+;+	2617	0.0164458	0.119881	0.129468	0.0393076	0.0962141	0.291475	0.0736362	0.207101	0.263939	0.114569	0.269914	0.0524096
Iyd	10;10;10;10;10;10;10;10;10	3540240;3540288;3545510;3545510;3547005;3547005;3551874;3551874;3554030	3540461;3540461;3545701;3545701;3547164;3547164;3552074;3552030;3554877	+;+;+;+;+;+;+;+;+	1623	0.371252	0.358988	0.208761	0.126763	0.31028	0.663512	0.0890507	0.333939	0.196425	0.422253	0.34196	0.704231
Plekhg1	10;10;10;10;10;10;10;10;10;10;10;10;10;10;10;10;10;10;10;10;10;10;10;10;10;10;10;10;10;10;10;10;10;10;10;10;10;10;10;10;10;10;10;10;10;10;10;10;10;10;10;10;10;10;10;10;10;10;10;10;10;10;10;10;10;10;10;10;10;10;10;10;10;10;10;10;10;10;10;10;10;10;10;10;10	3740364;3740378;3740665;3802740;3802740;3802740;3872667;3872667;3872927;3872927;3872927;3872927;3872927;3903557;3903557;3903557;3903557;3903557;3903582;3903586;3919136;3919136;3919136;3919136;3919136;3919136;3919136;3930207;3930207;3930207;3930207;3930207;3930207;3933597;3933597;3933597;3933597;3933597;3933597;3937850;3937850;3937850;3937850;3937850;3937850;3940169;3940169;3940169;3940169;3940438…	3740540;3740540;3741007;3802800;3802800;3802800;3872725;3872725;3873441;3873441;3873441;3873441;3873441;3903657;3903657;3903657;3903657;3903657;3903657;3903657;3919362;3919205;3919205;3919205;3919205;3919205;3919205;3930253;3930253;3930253;3930253;3930253;3930253;3933747;3933747;3933747;3933747;3933747;3933747;3938577;3938595;3937981;3937981;3937981;3937981;3940351;3940351;3940351;3940351;3940533…	+;+;+;+;+;+;+;+;+;+;+;+;+;+;+;+;+;+;+;+;+;+;+;+;+;+;+;+;+;+;+;+;+;+;+;+;+;+;+;+;+;+;+;+;+;+;+;+;+;+;+;+;+;+;+;+;+;+;+;+;+;+;+;+;+;+;+;+;+;+;+;+;+;+;+;+;+;+;+;+;+;+;+;+;+	8739	2.03399	1.82576	1.90462	2.41897	1.91891	2.02811	1.96807	1.73136	1.47744	2.35261	1.61081	1.83105
Mthfd1l	10;10;10;10;10;10;10;10;10;10;10;10;10;10;10;10;10;10;10;10;10;10;10;10;10;10;10;10;10;10;10;10;10;10;10;10;10;10;10;10;10;10;10;10;10;10;10;10;10;10;10;10;10;10;10;10;10;10;10;10;10;10;10;10;10;10;10;10;10;10;10;10;10;10;10;10;10;10;10;10;10;10;10;10;10;10;10;10;10;10;10	3973118;3973131;3973144;3978634;3978634;3978634;3980216;3980216;3980216;3980351;3980351;3980351;3984084;3984084;3984084;3985566;3985566;3985566;3989861;3989861;3989861;4007742;4007742;4007742;4015514;4015514;4015514;4016724;4016724;4016724;4018426;4018426;4018426;4028395;4028395;4028395;4030690;4030690;4030690;4032232;4032232;4032232;4032280;4033289;4033289;4033289;4033289;4035216;4035216;4035216…	3973478;3973478;3973478;3978718;3978718;3978718;3980266;3980266;3980266;3980404;3980404;3980404;3984208;3984208;3984208;3985666;3985666;3985666;3989997;3989997;3989997;4007853;4007853;4007853;4015605;4015605;4015605;4016821;4016821;4016821;4018599;4018599;4018599;4028531;4028531;4028531;4030736;4030736;4030736;4032339;4032339;4032339;4032339;4033363;4033363;4033363;4033363;4035318;4035318;4035318…	+;+;+;+;+;+;+;+;+;+;+;+;+;+;+;+;+;+;+;+;+;+;+;+;+;+;+;+;+;+;+;+;+;+;+;+;+;+;+;+;+;+;+;+;+;+;+;+;+;+;+;+;+;+;+;+;+;+;+;+;+;+;+;+;+;+;+;+;+;+;+;+;+;+;+;+;+;+;+;+;+;+;+;+;+;+;+;+;+;+;+	4435	3.1345	2.56682	3.43785	3.05009	2.86141	4.09748	3.37833	3.40139	2.9951	3.14844	3.13991	3.36061
Akap12	10;10;10;10;10;10;10;10;10;10	4266380;4313743;4346841;4347768;4353142;4353142;4353142;4358478;4358478;4358478	4266668;4313857;4346966;4347907;4357939;4357939;4357939;4359470;4359470;4359470	+;+;+;+;+;+;+;+;+;+	6461	19.7241	19.5061	22.7789	23.6751	21.364	25.4664	23.5253	19.3216	18.3799	21.3996	18.0313	22.2402
Zbtb2	10;10;10;10;10;10;10	4367075;4367075;4367082;4374570;4374570;4387352;4387845	4369851;4369851;4373875;4374754;4374754;4387475;4388108	-;-;-;-;-;-;-	7374	1.34241	1.17911	1.18316	1.05323	1.01072	1.11962	1.23479	1.13924	0.994352	1.26046	1.21108	1.0292
Rmnd1	10;10;10;10;10;10;10;10;10;10;10;10;10;10;10;10;10;10;10;10;10;10;10;10;10;10;10;10;10;10;10;10;10;10;10;10;10;10;10	4401915;4403171;4403546;4403874;4403874;4403984;4407805;4407805;4407805;4407805;4410713;4410713;4411667;4411667;4413309;4413309;4414543;4417153;4418556;4422082;4426094;4427171;4427243;4427445;4427523;4428369;4428409;4428536;4429077;4429077;4429077;4429077;4429077;4432064;4432266;4432266;4432266;4432266;4432266	4403501;4403501;4403990;4403990;4403990;4403990;4408105;4407925;4407918;4407925;4410789;4410789;4411731;4411731;4413745;4413415;4414643;4417192;4418631;4422190;4427691;4427691;4427691;4427691;4427691;4428465;4428465;4429171;4429171;4429171;4429171;4429171;4429171;4432295;4432344;4432301;4432334;4432334;4432388	-;-;-;-;-;-;-;-;-;-;-;-;-;-;-;-;-;-;-;-;-;-;-;-;-;-;-;-;-;-;-;-;-;-;-;-;-;-;-	5894	7.52119	7.62687	7.17849	7.89749	7.83487	7.46818	7.56078	8.38323	7.82481	7.55778	9.18526	6.49245
Armt1	10;10;10;10;10;10;10;10;10;10;10;10;10;10;10;10;10;10;10;10;10;10;10;10	4432467;4432513;4432620;4432627;4432635;4432640;4434581;4434828;4434828;4434828;4434828;4434828;4434828;4434828;4439492;4439492;4439492;4439492;4448309;4450647;4450647;4450647;4453472;4453472	4432711;4432711;4432711;4432711;4432711;4432711;4434654;4435174;4434933;4434933;4434933;4434933;4434933;4434933;4440469;4439973;4439736;4439736;4450412;4450809;4455140;4450809;4453958;4455141	+;+;+;+;+;+;+;+;+;+;+;+;+;+;+;+;+;+;+;+;+;+;+;+	8243	1.04947	1.21792	1.17146	1.09819	1.11799	1.26831	1.40269	0.936947	0.966875	1.12238	1.02831	1.12591
Ccdc170	10;10;10;10;10;10;10;10;10;10;10;10;10;10;10;10;10;10;10;10;10;10;10;10;10;10;10;10	4482502;4509872;4511543;4512752;4512752;4512752;4514056;4514056;4514056;4518906;4518906;4520755;4520755;4532995;4533959;4533959;4533959;4541682;4541682;4541682;4546766;4546766;4549557;4549557;4558497;4558497;4560899;4560899	4482628;4509919;4511726;4512880;4512880;4512880;4514312;4514312;4514312;4519050;4519050;4520940;4520940;4533204;4534276;4534276;4534276;4541701;4541882;4541882;4546939;4546939;4549799;4549799;4558733;4558733;4561111;4562231	+;+;+;+;+;+;+;+;+;+;+;+;+;+;+;+;+;+;+;+;+;+;+;+;+;+;+;+	3792	1.47548	1.83197	2.37897	1.72261	3.1474	2.09441	1.96924	1.76278	1.59735	1.87504	2.47484	1.66381
Esr1	10;10;10;10;10;10;10;10;10;10;10;10;10;10;10;10;10;10;10;10;10;10;10;10;10;10;10;10;10;10;10;10;10;10;10;10;10;10;10;10;10;10;10;10;10;10;10;10;10;10;10;10;10;10;10;10;10;10;10;10;10;10;10;10;10;10	4611593;4611989;4611996;4612013;4612021;4650491;4654120;4669223;4669223;4669223;4669223;4710155;4710155;4712313;4712313;4712313;4712313;4712313;4712313;4712651;4746617;4746617;4746617;4746617;4746617;4746617;4746617;4783857;4783857;4783857;4783857;4783857;4783857;4783857;4856858;4856858;4856858;4856858;4856858;4856858;4891940;4892194;4922970;4936526;4939212;4939212;4939212;4939212;4939212;4939212…	4612155;4612155;4612155;4612155;4612155;4650721;4654246;4669332;4671884;4669332;4669332;4710294;4710294;4712847;4712847;4712847;4712847;4712847;4712847;4712847;4746807;4746807;4746807;4746807;4746807;4746807;4746807;4784824;4783973;4783973;4783973;4783973;4783973;4783973;4857509;4857193;4857193;4857193;4857193;4857193;4892044;4893083;4923314;4936619;4939350;4939350;4939350;4939350;4939350;4939350…	+;+;+;+;+;+;+;+;+;+;+;+;+;+;+;+;+;+;+;+;+;+;+;+;+;+;+;+;+;+;+;+;+;+;+;+;+;+;+;+;+;+;+;+;+;+;+;+;+;+;+;+;+;+;+;+;+;+;+;+;+;+;+;+;+;+	13661	0.9798	1.43697	1.40751	1.8411	1.36393	2.2729	1.23783	0.9687	0.89456	1.62099	1.82451	1.23492
Syne1	10;10;10;10;10;10;10;10;10;10;10;10;10;10;10;10;10;10;10;10;10;10;10;10;10;10;10;10;10;10;10;10;10;10;10;10;10;10;10;10;10;10;10;10;10;10;10;10;10;10;10;10;10;10;10;10;10;10;10;10;10;10;10;10;10;10;10;10;10;10;10;10;10;10;10;10;10;10;10;10;10;10;10;10;10;10;10;10;10;10;10;10;10;10;10;10;10;10;10;10;10;10;10;10;10;10;10;10;10;10;10;10;10;10;10;10;10;10;10;10;10;10;10;10;10;10;10;10;10;10;10;10;10;…	5020917;5021579;5030376;5030376;5031766;5031766;5032917;5032917;5034933;5034933;5037216;5037216;5040764;5040764;5041461;5041461;5043611;5043611;5045266;5047531;5047531;5048724;5048724;5052275;5052275;5052656;5052656;5056377;5056377;5057780;5057780;5061389;5061389;5064976;5068807;5072037;5075789;5083824;5086668;5097485;5099360;5102330;5103636;5104814;5107813;5108522;5110831;5111375;5113950;5116967…	5022247;5022247;5030434;5030434;5031858;5031858;5033129;5033129;5035061;5035061;5037416;5037416;5040975;5040975;5041584;5041584;5043753;5043753;5045334;5047858;5047858;5048915;5048915;5052412;5052412;5052838;5052838;5056527;5056527;5057967;5057967;5061551;5061551;5068913;5069063;5072203;5075947;5083979;5086793;5097679;5099594;5102424;5103783;5104968;5107959;5108704;5111035;5111508;5114120;5117122…	-;-;-;-;-;-;-;-;-;-;-;-;-;-;-;-;-;-;-;-;-;-;-;-;-;-;-;-;-;-;-;-;-;-;-;-;-;-;-;-;-;-;-;-;-;-;-;-;-;-;-;-;-;-;-;-;-;-;-;-;-;-;-;-;-;-;-;-;-;-;-;-;-;-;-;-;-;-;-;-;-;-;-;-;-;-;-;-;-;-;-;-;-;-;-;-;-;-;-;-;-;-;-;-;-;-;-;-;-;-;-;-;-;-;-;-;-;-;-;-;-;-;-;-;-;-;-;-;-;-;-;-;-;-;-;-;-;-;-;-;-;-;-;-;-;-;-;-;-;-;-;-;-;-;-;-;-;-;-;-;-;-;-;-;-;-;-;-;-;-;-;-;-;-;-;-;-;-;-;-;-;-;-;-;-;-;-;-;-;-;-;-;-;-;-;-;-;-;-;-…	40491	3.33438	3.045	3.46948	3.73202	2.92766	2.63296	3.46234	3.48351	3.67946	3.15443	3.16876	2.8397
Gm10097	10	5069192	5071975	+	2784	0	0	0	0	0	0	0	0	0.0190851	0	0	0
Myct1	10;10	5593775;5604187	5593901;5606904	+;+	2845	1.99688	2.78834	1.84594	1.84403	2.99142	2.11338	1.89658	1.95266	2.18508	2.8605	2.34096	1.62305
Vip	10;10;10;10;10;10;10;10;10;10;10;10;10	5639218;5640352;5640618;5640618;5642469;5643523;5643523;5643987;5643987;5644910;5644910;5646802;5646802	5639370;5640489;5640734;5642594;5642594;5643627;5643627;5644118;5644118;5644990;5644990;5646900;5647617	+;+;+;+;+;+;+;+;+;+;+;+;+	3402	0	0	0	0	0.0148026	0	0	0.0132761	0.0156182	0.0251806	0	0.0134388
Fbxo5	10;10;10;10;10;10;10	5799160;5800256;5801152;5801869;5802200;5804538;5805259	5799822;5800435;5801242;5802532;5802532;5804600;5805600	-;-;-;-;-;-;-	2003	8.57337	9.6215	10.5299	7.06159	7.89444	10.1478	12.002	12.5822	9.97404	8.93854	11.2345	10.568
Mtrf1l	10;10;10;10;10;10;10;10;10;10;10;10;10	5811887;5813212;5814041;5814041;5815552;5815552;5817449;5818801;5819201;5820025;5820025;5823526;5823526	5813406;5813406;5814177;5814177;5815755;5815669;5817612;5818984;5819787;5820104;5820104;5823546;5823910	-;-;-;-;-;-;-;-;-;-;-;-;-	3261	9.92491	9.31825	9.74066	9.02186	7.96841	9.13636	9.24822	10.8308	9.92272	8.97101	9.59274	9.71574
Rgs17	10;10;10;10;10;10;10;10;10;10;10;10;10;10;10;10;10;10;10;10;10;10;10;10	5825663;5825663;5832169;5833096;5841272;5841272;5841272;5841272;5842536;5842536;5842536;5842536;5862519;5862519;5862519;5862519;5915793;5918184;5918184;5918184;5922228;5922228;5922228;5922228	5833141;5833141;5833141;5833141;5841506;5841506;5841506;5841506;5842625;5842625;5842625;5842625;5862662;5862662;5862662;5862662;5915899;5918253;5918253;5918253;5922366;5922366;5922400;5922386	-;-;-;-;-;-;-;-;-;-;-;-;-;-;-;-;-;-;-;-;-;-;-;-	8298	0.762436	0.44289	0.535912	0.588845	0.297369	0.46503	0.748947	0.691249	0.384186	0.516176	0.419544	0.462806
Oprm1	10;10;10;10;10;10;10;10;10;10;10;10;10;10;10;10;10;10;10;10;10;10;10;10;10;10;10;10;10;10;10;10;10;10;10;10;10;10;10;10;10;10;10;10;10;10;10;10;10;10;10;10;10;10;10;10;10;10;10;10;10;10;10;10;10;10;10;10;10;10;10;10;10;10;10;10;10;10;10;10;10;10;10;10;10;10;10;10;10;10;10;10;10;10;10;10;10;10;10;10;10;10;10;10;10;10;10;10;10;10;10;10;10;10;10;10;10;10;10;10;10;10;10;10;10;10;10;10;10;10;10;10;10;…	6758506;6758506;6758593;6758593;6758593;6758593;6758593;6758593;6758593;6760453;6788570;6788601;6788694;6788744;6788744;6788744;6788809;6788809;6788809;6788809;6788809;6788809;6788809;6788809;6788809;6788809;6788809;6788809;6788809;6788809;6788809;6788837;6788837;6788975;6789025;6789099;6790995;6794231;6794789;6823806;6825115;6828885;6828885;6828885;6828885;6828885;6828885;6828885;6828885;6828885…	6758690;6758690;6758690;6758690;6758690;6758690;6758690;6758690;6758690;6760581;6789158;6789158;6789158;6789158;6789158;6789158;6789158;6789158;6789158;6789158;6789158;6789158;6789158;6789158;6789158;6789158;6789158;6789158;6789158;6789158;6789158;6789158;6789158;6789158;6789158;6789158;6791089;6794308;6794891;6823913;6825263;6828911;6829237;6829237;6829237;6829237;6829237;6829237;6829237;6829237…	+;+;+;+;+;+;+;+;+;+;+;+;+;+;+;+;+;+;+;+;+;+;+;+;+;+;+;+;+;+;+;+;+;+;+;+;+;+;+;+;+;+;+;+;+;+;+;+;+;+;+;+;+;+;+;+;+;+;+;+;+;+;+;+;+;+;+;+;+;+;+;+;+;+;+;+;+;+;+;+;+;+;+;+;+;+;+;+;+;+;+;+;+;+;+;+;+;+;+;+;+;+;+;+;+;+;+;+;+;+;+;+;+;+;+;+;+;+;+;+;+;+;+;+;+;+;+;+;+;+;+;+;+;+;+;+;+;+;+;+;+;+;+;+;+;+;+;+;+;+;+;+	8037	0	0.0167295	0.015809	0.0127993	0	0.00558293	0.0419603	0.0112393	0	0.00532939	0.0062778	0
Ipcef1	10;10;10;10;10;10;10;10;10;10;10;10;10;10;10;10;10;10;10;10;10;10;10;10;10;10;10;10;10;10;10;10;10;10;10;10;10;10;10;10;10;10;10;10;10;10;10;10;10;10;10;10;10;10;10;10;10;10;10;10;10;10;10;10;10;10;10;10;10	6885796;6890439;6900570;6900570;6911543;6911543;6917554;6917554;6919714;6919714;6919714;6919714;6919835;6919915;6935175;6935175;6935187;6935187;6935187;6935187;6935187;6937101;6937101;6937101;6937101;6937101;6937101;6937101;6937101;6954670;6954670;6954670;6954670;6954670;6954670;6954670;6954670;6956059;6956059;6956059;6956059;6956059;6956059;6956059;6956059;6956062;6979514;6979514;6979514;6979514…	6890675;6890675;6900763;6900763;6911958;6911958;6920086;6920086;6920086;6920086;6920086;6920086;6920086;6920086;6935275;6935275;6935275;6935275;6935275;6935275;6935275;6937159;6937159;6937159;6937159;6937159;6937159;6937159;6937159;6954741;6954741;6954741;6954741;6954741;6954741;6954741;6954741;6956132;6956132;6956132;6956132;6956132;6956132;6956132;6956132;6956132;6979683;6979683;6979683;6979683…	-;-;-;-;-;-;-;-;-;-;-;-;-;-;-;-;-;-;-;-;-;-;-;-;-;-;-;-;-;-;-;-;-;-;-;-;-;-;-;-;-;-;-;-;-;-;-;-;-;-;-;-;-;-;-;-;-;-;-;-;-;-;-;-;-;-;-;-;-	9003	0.740976	0.507772	0.512763	0.49703	0.330018	0.647906	0.658192	0.647152	0.460332	0.42818	0.63888	0.700786
Cnksr3	10;10;10;10;10;10;10;10;10;10;10;10;10;10;10;10;10;10;10	7119063;7119063;7126095;7126095;7126635;7126635;7129023;7129023;7134522;7134522;7135048;7135048;7138355;7140319;7142961;7152864;7154283;7160644;7211632	7120586;7120586;7126184;7126184;7126843;7126843;7129147;7129147;7134668;7134668;7135506;7135116;7138414;7140438;7143002;7152951;7154485;7160807;7212237	-;-;-;-;-;-;-;-;-;-;-;-;-;-;-;-;-;-;-	3837	2.26579	2.61645	2.45041	2.10455	2.70363	2.94689	2.68693	2.76618	1.9802	2.69027	2.89289	2.63326
Ulbp1	10;10;10;10;10;10;10;10;10;10;10	7444873;7445391;7446418;7446418;7447381;7447381;7456340;7456340;7456954;7473254;7473254	7445697;7445697;7446552;7446552;7447484;7447484;7456615;7456615;7457208;7473361;7473477	-;-;-;-;-;-;-;-;-;-;-	1819	0.686159	0.468141	0.6985	0.367588	0.692118	1.08537	0.582673	0.273127	0.2921	0.541585	0.859866	0.578081
Lrp11	10;10;10;10;10;10;10;10;10;10;10;10;10;10;10;10;10;10;10;10;10;10;10;10;10;10;10;10	7589800;7589817;7589979;7590127;7596104;7596104;7596104;7596184;7598692;7598707;7598707;7598707;7602829;7602829;7602829;7604174;7604174;7604174;7604174;7608544;7608544;7608544;7608544;7608548;7623630;7623630;7623630;7623630	7590613;7590613;7590613;7590613;7596264;7596264;7596264;7596264;7598848;7598848;7598848;7598848;7602954;7602954;7602954;7604383;7604383;7604383;7604383;7608639;7608639;7608639;7608567;7608639;7623752;7625483;7624022;7625483	+;+;+;+;+;+;+;+;+;+;+;+;+;+;+;+;+;+;+;+;+;+;+;+;+;+;+;+	3418	5.02413	1.5866	1.47453	2.78388	2.66673	1.29963	2.00148	1.33461	1.22806	2.16793	1.49091	1.37771
Pcmt1	10;10;10;10;10;10;10;10;10;10;10;10;10;10;10;10;10;10;10;10;10;10;10;10;10;10;10;10;10;10;10;10;10;10;10;10;10;10;10;10;10;10;10;10;10;10;10;10;10;10;10;10;10;10;10;10;10;10	7629373;7629373;7629381;7637730;7637730;7638009;7638056;7638056;7638868;7639659;7640045;7640045;7640045;7640045;7640045;7640695;7640695;7640695;7640695;7640695;7640695;7644325;7644325;7644325;7644325;7644325;7644325;7644332;7647590;7647590;7647590;7647590;7647590;7647590;7647590;7647594;7647619;7648467;7648467;7648965;7649051;7649051;7649051;7649051;7649051;7649051;7649051;7649051;7649051;7651350…	7630976;7630976;7630976;7638225;7638225;7638225;7638225;7638225;7638995;7640130;7640130;7640130;7640130;7640130;7640130;7640815;7640815;7640815;7640815;7640815;7640815;7644429;7644429;7644429;7644429;7644429;7644429;7644429;7647621;7647621;7647621;7647621;7647621;7647621;7647621;7647621;7647621;7648660;7648660;7649155;7649155;7649155;7649155;7649155;7649155;7649155;7649155;7649155;7649155;7651536…	-;-;-;-;-;-;-;-;-;-;-;-;-;-;-;-;-;-;-;-;-;-;-;-;-;-;-;-;-;-;-;-;-;-;-;-;-;-;-;-;-;-;-;-;-;-;-;-;-;-;-;-;-;-;-;-;-;-	4718	4.58849	5.17719	4.84745	4.31706	4.29082	4.17506	4.45208	5.11196	4.03171	4.82975	4.12792	4.80637
Nup43	10;10;10;10;10;10;10;10;10;10;10;10;10;10;10;10;10;10;10	7667503;7667514;7667540;7668002;7668002;7668002;7669553;7669553;7670755;7670939;7670939;7673585;7673585;7673585;7675006;7675006;7675006;7676240;7678568	7667681;7667681;7667681;7668291;7668124;7668124;7669630;7669630;7671119;7671119;7671119;7673720;7673720;7673720;7676080;7675254;7675157;7676362;7678881	+;+;+;+;+;+;+;+;+;+;+;+;+;+;+;+;+;+;+	2560	2.21919	2.22341	2.20034	1.84841	1.8491	1.8579	3.10512	2.48762	2.42834	2.17508	2.50303	2.50024
Lats1	10;10;10;10;10;10;10;10;10;10;10;10;10;10;10;10	7681209;7691247;7691335;7697502;7697502;7701610;7701610;7705460;7705460;7710465;7710465;7710849;7710849;7712501;7712501;7713312	7681450;7691814;7691814;7697649;7697649;7703120;7703120;7706042;7706042;7710647;7710647;7710955;7710955;7713280;7716458;7713586	+;+;+;+;+;+;+;+;+;+;+;+;+;+;+;+	7300	4.83449	5.47643	5.03587	4.9884	5.38077	5.13854	4.52067	4.92486	4.38893	4.77609	4.5893	4.5155
Katna1	10;10;10;10;10;10;10;10;10;10;10;10;10;10;10;10;10;10;10;10;10;10;10;10;10;10;10;10;10;10;10;10;10;10;10;10;10	7726000;7726000;7726008;7738723;7738723;7738723;7741408;7741408;7741408;7743556;7743556;7748776;7748776;7748776;7748875;7751544;7751544;7751544;7751544;7752744;7752744;7752744;7752744;7759697;7759697;7759697;7759772;7760735;7760735;7760735;7761233;7761243;7761243;7762790;7762790;7762790;7762790	7726123;7726123;7726123;7738897;7738897;7738897;7741565;7741565;7741565;7743736;7743736;7748897;7748897;7748897;7748897;7751649;7751649;7751649;7751649;7752902;7752749;7752902;7752902;7760233;7759823;7759823;7759823;7760869;7760869;7760869;7761361;7761369;7761369;7763148;7763064;7763150;7763149	+;+;+;+;+;+;+;+;+;+;+;+;+;+;+;+;+;+;+;+;+;+;+;+;+;+;+;+;+;+;+;+;+;+;+;+;+	2195	16.3528	16.008	16.0148	13.6845	14.1096	16.2513	16.4173	16.5229	15.952	14.6352	15.7685	16.3921
Ginm1	10;10;10;10;10;10;10;10;10;10;10;10;10;10;10;10;10;10;10;10;10;10	7767947;7767950;7767956;7770357;7770357;7770357;7773298;7773298;7773948;7773948;7775218;7775218;7777774;7777774;7779303;7779303;7779303;7780761;7780761;7791420;7792508;7792523	7768585;7768585;7768585;7770551;7770520;7770520;7773431;7773428;7774104;7774104;7775369;7775369;7777870;7777870;7779362;7779362;7779362;7780891;7780917;7792824;7792800;7792822	-;-;-;-;-;-;-;-;-;-;-;-;-;-;-;-;-;-;-;-;-;-	2996	18.3303	17.4875	19.7908	16.8242	19.3635	17.5227	16.4662	16.1907	22.0974	16.5982	17.969	14.8021
Ppil4	10;10;10;10;10;10;10;10;10;10;10;10;10;10;10;10;10;10;10;10;10;10;10;10;10;10;10;10;10;10	7792891;7792908;7792921;7795644;7795644;7795644;7795797;7795797;7795797;7797758;7797758;7798415;7799553;7799553;7799566;7800734;7800734;7800734;7801845;7801845;7801845;7804956;7804956;7804956;7807271;7807271;7810362;7812112;7814664;7820952	7793020;7793020;7793020;7795711;7795711;7795711;7795861;7797166;7795861;7798557;7797875;7798557;7799649;7799649;7799649;7800850;7800850;7800850;7801969;7801969;7801969;7805022;7805394;7805022;7807366;7807382;7810458;7812874;7814811;7823135	+;+;+;+;+;+;+;+;+;+;+;+;+;+;+;+;+;+;+;+;+;+;+;+;+;+;+;+;+;+	6450	18.9437	17.976	16.0808	17.5115	15.4355	15.9236	17.0672	17.1278	15.9481	17.2259	16.9356	16.9478
Zc3h12d	10;10;10;10;10;10	7832470;7839765;7853188;7862386;7866228;7867264	7832562;7840148;7853327;7862620;7866334;7870397	+;+;+;+;+;+	4093	0.126182	0.0547499	0.144865	0.0753981	0.0492142	0.0657757	0.0470818	0.088278	0.0389443	0.125577	0.110944	0.212229
Tab2	10;10;10;10;10;10;10;10;10;10;10;10;10;10;10;10;10;10;10	7905653;7907329;7907439;7910047;7910047;7910047;7911089;7911089;7911388;7911492;7919114;7919114;7919340;7923225;7924685;7924685;7933068;7955801;7955801	7907577;7907577;7907577;7910500;7910127;7910127;7911486;7911182;7911548;7911548;7920614;7920614;7920614;7924260;7924872;7924872;7933208;7955893;7956230	-;-;-;-;-;-;-;-;-;-;-;-;-;-;-;-;-;-;-	6135	17.5592	17.8689	17.2102	19.2993	15.6616	19.3084	17.5901	18.0661	14.8443	17.3703	15.8231	17.4901
Ust	10;10;10;10;10;10;10;10	8204753;8245903;8248089;8298056;8307408;8330068;8390888;8518150	8207670;8246060;8248186;8298209;8307487;8330223;8390931;8518825	-;-;-;-;-;-;-;-	4284	3.17466	2.97115	3.85561	3.85395	2.62137	4.17907	3.93598	3.82702	2.82781	3.76932	4.45189	3.43637
Sash1	10;10;10;10;10;10;10;10;10;10;10;10;10;10;10;10;10;10;10;10;10;10;10;10;10;10;10;10;10;10;10	8722219;8727858;8729328;8733596;8739321;8740174;8741428;8742428;8744488;8744599;8746116;8746116;8750653;8751139;8751159;8756629;8756629;8756629;8762095;8780519;8784198;8786348;8789561;8813722;8814241;8814407;8814407;8850363;8850363;8885724;8885724	8725760;8727989;8730436;8733709;8739471;8740383;8741597;8742563;8744631;8744631;8746190;8746190;8751485;8751485;8751485;8756761;8756761;8756761;8762474;8780620;8784310;8786434;8789601;8814290;8814290;8814457;8814457;8850491;8850491;8886052;8886070	-;-;-;-;-;-;-;-;-;-;-;-;-;-;-;-;-;-;-;-;-;-;-;-;-;-;-;-;-;-;-	8568	4.16423	4.38872	4.80962	6.14111	5.8011	5.78157	4.85813	5.19231	3.68359	5.44402	4.03967	5.55475
Samd5	10;10	9627259;9674505	9629049;9675208	-;-	2495	0.08625	0.125743	0.169749	0.0824594	0.201838	0.305727	0.135164	0.181023	0.106479	0.120171	0.242668	0.164917
Stxbp5	10;10;10;10;10;10;10;10;10;10;10;10;10;10;10;10;10;10;10;10;10;10;10;10;10;10;10;10;10;10;10;10;10;10;10;10;10;10;10;10;10;10;10;10;10;10;10;10;10;10;10;10;10;10;10;10;10;10;10;10;10;10;10;10;10;10;10;10;10;10;10;10;10;10;10;10;10;10;10;10;10;10;10;10;10;10;10;10;10;10;10;10;10;10;10;10;10;10;10;10;10;10;10;10;10;10;10;10;10;10;10;10;10;10;10;10	9755547;9759958;9759996;9760581;9760913;9762745;9762745;9762745;9762745;9762745;9767099;9767102;9767158;9767158;9767158;9767158;9767158;9767209;9768830;9768830;9768830;9768830;9768830;9768830;9768830;9768830;9769341;9769341;9769341;9769341;9769341;9769341;9769341;9769437;9769603;9770450;9770450;9770450;9770450;9770450;9770450;9770450;9770450;9778021;9778021;9778021;9778021;9778021;9778021;9778021…	9760954;9760954;9760954;9760954;9760954;9762965;9762965;9762965;9762965;9762965;9767269;9767269;9767269;9767269;9767269;9767269;9767269;9767269;9768948;9768995;9768995;9768995;9768995;9768995;9768995;9768995;9769534;9770521;9769710;9769710;9769710;9769710;9769710;9769710;9769710;9770689;9770689;9770689;9770689;9770689;9770689;9770689;9770689;9778309;9778309;9780328;9778066;9778071;9778071;9778071…	-;-;-;-;-;-;-;-;-;-;-;-;-;-;-;-;-;-;-;-;-;-;-;-;-;-;-;-;-;-;-;-;-;-;-;-;-;-;-;-;-;-;-;-;-;-;-;-;-;-;-;-;-;-;-;-;-;-;-;-;-;-;-;-;-;-;-;-;-;-;-;-;-;-;-;-;-;-;-;-;-;-;-;-;-;-;-;-;-;-;-;-;-;-;-;-;-;-;-;-;-;-;-;-;-;-;-;-;-;-;-;-;-;-;-;-	12871	2.30057	2.1415	2.27704	2.23383	1.86629	2.03939	2.22336	2.69145	1.95673	2.00667	2.25794	2.00692
Adgb	10;10;10;10;10;10;10;10;10;10;10;10;10;10;10;10;10;10;10;10;10;10;10;10;10;10;10;10;10;10;10;10;10;10;10;10;10;10;10;10;10;10;10;10;10;10;10;10;10;10;10;10;10;10;10;10;10;10;10;10;10;10;10;10;10;10;10;10;10;10;10;10;10;10;10;10;10;10;10;10;10;10;10;10;10;10;10;10;10;10;10;10;10;10;10;10;10;10;10;10;10;10;10;10;10;10;10;10;10;10;10;10;10;10;10;10;10;10;10;10;10;10;10;10;10;10;10;10;10;10;10;10;10;…	10335703;10335709;10335709;10335938;10339547;10339547;10339547;10339547;10340434;10340434;10340434;10340434;10346407;10346407;10346407;10346407;10349470;10349470;10349470;10349470;10350252;10350252;10350252;10350252;10352897;10352897;10352897;10352897;10357867;10357867;10357867;10357867;10377842;10377842;10377842;10377842;10378665;10378665;10378665;10378665;10382725;10382725;10382725;10382725;103…	10336126;10336126;10336126;10336126;10339730;10339730;10339730;10339730;10340524;10340524;10340524;10340524;10346574;10346574;10346574;10346574;10349599;10349599;10349599;10349599;10350440;10350440;10350440;10350440;10353060;10353060;10353060;10353063;10357978;10357978;10357978;10357978;10378041;10378041;10378041;10378041;10378849;10378849;10378849;10378849;10382912;10382912;10382912;10382912;103…	-;-;-;-;-;-;-;-;-;-;-;-;-;-;-;-;-;-;-;-;-;-;-;-;-;-;-;-;-;-;-;-;-;-;-;-;-;-;-;-;-;-;-;-;-;-;-;-;-;-;-;-;-;-;-;-;-;-;-;-;-;-;-;-;-;-;-;-;-;-;-;-;-;-;-;-;-;-;-;-;-;-;-;-;-;-;-;-;-;-;-;-;-;-;-;-;-;-;-;-;-;-;-;-;-;-;-;-;-;-;-;-;-;-;-;-;-;-;-;-;-;-;-;-;-;-;-;-;-;-;-;-;-;-;-;-;-;-;-;-;-;-;-;-;-;-;-;-;-;-;-;-;-;-;-;-;-;-;-;-;-	6192	0.139014	0.11581	0.109438	0.0581457	0.105727	0.0579716	0.132267	0.109412	0.09439	0.110678	0.0977804	0.0886021
Rab32	10;10;10	10545011;10550679;10557845	10546451;10550956;10558233	-;-;-	2108	1.98044	1.95602	1.92876	1.85436	1.3378	2.04341	1.73691	2.20684	1.96602	1.66615	2.51316	2.16882
Grm1	10;10;10;10;10;10;10;10;10;10;10;10;10;10;10;10;10;10;10;10;10;10;10;10;10;10;10;10;10;10;10;10;10;10;10;10	10686059;10688588;10688801;10689448;10698048;10698048;10716305;10719223;10719223;10719223;10719223;10733159;10733159;10733159;10741436;10741436;10741436;10746182;10746545;10746545;10746545;10746545;10748606;10782559;10782559;10782559;10936329;10936329;10936329;11079839;11079839;11079839;11080489;11082169;11082249;11082249	10689902;10689902;10689902;10689902;10698132;10698132;10716406;10719251;10720153;10720153;10720153;10733285;10733285;10733285;10741604;10741604;10741604;10746329;10746791;10746791;10746791;10746791;10748808;10782794;10782794;10782794;10936578;10936578;10936578;11080956;11080856;11080856;11080856;11082250;11082305;11082356	-;-;-;-;-;-;-;-;-;-;-;-;-;-;-;-;-;-;-;-;-;-;-;-;-;-;-;-;-;-;-;-;-;-;-;-	7648	0.0168824	0.0117203	0.0166131	0	0	0.00586689	0	0.00590549	0.00694731	0.0112009	0.00659711	0.0119557
Shprh	10;10;10;10;10;10;10;10;10;10;10;10;10;10;10;10;10;10;10;10;10;10;10;10;10;10;10;10;10;10;10;10;10;10;10;10;10;10;10;10;10;10;10;10;10;10;10;10;10;10;10;10;10;10;10;10;10;10;10;10;10;10;10;10;10;10;10;10;10;10;10;10;10;10;10;10;10;10;10;10;10;10;10;10;10;10;10;10;10;10;10;10;10;10;10;10;10;10;10;10;10;10;10;10;10;10;10;10;10;10;10;10;10;10;10;10;10;10;10;10;10;10;10;10;10;10;10;10;10;10;10;10;10;…	11149427;11149430;11149473;11149524;11149524;11151613;11151613;11151613;11151613;11151613;11154659;11154659;11154659;11154659;11157020;11157020;11157020;11157020;11159518;11159518;11159518;11159518;11160467;11160467;11160467;11160467;11162119;11162119;11162119;11162119;11162809;11162809;11162809;11162809;11164345;11164345;11164345;11164345;11164345;11166457;11166486;11166486;11166486;11166486;111…	11149586;11149586;11149586;11149586;11149586;11154526;11152268;11152268;11152268;11152268;11154788;11154788;11154788;11154788;11157238;11157238;11157238;11157238;11159596;11159596;11159596;11159596;11160617;11160617;11160617;11160617;11162227;11162227;11162227;11162227;11163062;11163062;11163062;11163062;11164995;11164995;11164995;11164995;11164995;11166737;11166737;11166737;11166737;11166737;111…	+;+;+;+;+;+;+;+;+;+;+;+;+;+;+;+;+;+;+;+;+;+;+;+;+;+;+;+;+;+;+;+;+;+;+;+;+;+;+;+;+;+;+;+;+;+;+;+;+;+;+;+;+;+;+;+;+;+;+;+;+;+;+;+;+;+;+;+;+;+;+;+;+;+;+;+;+;+;+;+;+;+;+;+;+;+;+;+;+;+;+;+;+;+;+;+;+;+;+;+;+;+;+;+;+;+;+;+;+;+;+;+;+;+;+;+;+;+;+;+;+;+;+;+;+;+;+;+;+;+;+;+;+;+;+;+;+;+	14066	2.02557	1.84486	2.08661	2.08062	2.05143	2.14046	1.97282	2.08391	1.85093	1.8301	2.00513	2.14195
Fbxo30	10;10;10;10;10;10	11281330;11281587;11289520;11289520;11295217;11295217	11281500;11281723;11291572;11291572;11295518;11298052	+;+;+;+;+;+	5197	2.56725	2.69065	2.61595	2.83051	2.83914	2.73692	2.79956	3.22422	2.60706	3.35438	2.96107	2.87666
Epm2a	10;10;10;10;10;10	11343404;11343453;11390811;11448642;11448642;11457140	11343768;11343768;11390985;11448883;11448698;11459644	+;+;+;+;+;+	3287	0.90346	1.19988	0.979246	1.23617	1.01115	1.21492	1.14322	1.12673	1.11536	1.0555	1.35078	1.12662
Gm9797	10	11609257	11610438	+	1182	6.19001	7.01471	6.30627	4.43847	4.89951	4.82106	6.88817	8.86491	6.60791	4.74706	6.40288	5.37639
Utrn	10;10;10;10;10;10;10;10;10;10;10;10;10;10;10;10;10;10;10;10;10;10;10;10;10;10;10;10;10;10;10;10;10;10;10;10;10;10;10;10;10;10;10;10;10;10;10;10;10;10;10;10;10;10;10;10;10;10;10;10;10;10;10;10;10;10;10;10;10;10;10;10;10;10	12382188;12385518;12401311;12402883;12405854;12406436;12413936;12415181;12415451;12421597;12436281;12439627;12441936;12448007;12455363;12463286;12465181;12475271;12478413;12481224;12486386;12501378;12525338;12538041;12621191;12633944;12636596;12640927;12643403;12649143;12652711;12654699;12658496;12660779;12663366;12664947;12666699;12667500;12669656;12670120;12671751;12678580;12680472;12682277;126…	12384196;12385540;12401403;12402991;12406094;12406594;12414001;12415246;12415489;12421733;12436392;12439793;12442093;12448092;12455564;12463360;12465242;12475331;12478491;12481370;12486654;12501507;12525494;12538213;12621380;12634098;12636801;12641044;12643611;12649218;12652860;12654834;12658671;12660929;12663538;12665138;12666836;12667658;12669826;12670248;12671930;12678750;12680627;12682450;126…	-;-;-;-;-;-;-;-;-;-;-;-;-;-;-;-;-;-;-;-;-;-;-;-;-;-;-;-;-;-;-;-;-;-;-;-;-;-;-;-;-;-;-;-;-;-;-;-;-;-;-;-;-;-;-;-;-;-;-;-;-;-;-;-;-;-;-;-;-;-;-;-;-;-	12382	6.18365	6.73614	6.52627	7.78032	7.34106	7.78394	5.97245	5.32192	5.96899	7.50655	6.79684	6.75331
Stx11	10;10;10;10;10	12939983;12939983;12944152;12964000;12964000	12941983;12941983;12944286;12964259;12964259	-;-;-;-;-	2396	1.00591	2.16983	2.54538	1.95346	2.69027	3.85777	0.924924	0.885962	2.63891	2.66361	2.21108	1.2212
Sf3b5	10	13005343	13009183	+	3841	3.45117	3.16214	3.76	3.42804	3.84146	3.63306	3.46178	3.72751	4.28827	3.3231	3.8488	3.71367
Plagl1	10;10;10;10;10;10;10;10;10;10;10;10;10;10;10;10;10;10;10;10;10;10;10;10;10;10;10;10;10;10;10;10;10;10;10;10;10;10;10;10;10;10;10;10;10;10;10;10;10;10;10;10;10;10;10;10;10;10;10;10;10;10;10;10;10;10;10;10;10;10;10;10;10;10;10;10;10;10;10;10;10;10;10;10;10;10;10;10;10;10;10;10;10;10;10;10;10;10;10;10;10;10;10;10;10;10;10;10;10;10;10;10;10;10;10;10;10;10;10;10;10;10	13060504;13081476;13084638;13090691;13090712;13090788;13090788;13090832;13090832;13090832;13090832;13090832;13090832;13090832;13090832;13090832;13090832;13090832;13090832;13090832;13090835;13090841;13090874;13090874;13091013;13091775;13091775;13091775;13091775;13091775;13091775;13105855;13105855;13105855;13105855;13105855;13105855;13105855;13105855;13105855;13105855;13105855;13105855;13105855;131…	13060859;13081522;13084764;13091020;13091024;13091024;13091024;13091020;13091020;13091024;13091024;13091020;13091024;13091024;13091024;13091020;13091024;13091024;13091020;13091024;13091024;13091024;13091020;13091020;13091020;13091812;13091812;13091812;13091812;13091812;13091812;13105893;13105893;13105893;13105893;13105893;13105893;13105893;13105893;13105893;13105893;13105893;13105893;13106373;131…	+;+;+;+;+;+;+;+;+;+;+;+;+;+;+;+;+;+;+;+;+;+;+;+;+;+;+;+;+;+;+;+;+;+;+;+;+;+;+;+;+;+;+;+;+;+;+;+;+;+;+;+;+;+;+;+;+;+;+;+;+;+;+;+;+;+;+;+;+;+;+;+;+;+;+;+;+;+;+;+;+;+;+;+;+;+;+;+;+;+;+;+;+;+;+;+;+;+;+;+;+;+;+;+;+;+;+;+;+;+;+;+;+;+;+;+;+;+;+;+;+;+	7819	40.2315	30.2992	32.2125	33.2391	26.2773	39.4126	33.2349	42.3695	29.3628	30.6328	36.2843	37.3456
Zc2hc1b	10;10;10;10;10;10	13149540;13153474;13167801;13168708;13171276;13177958	13150169;13153613;13167939;13168827;13171337;13177991	-;-;-;-;-;-	1125	0	0	0.0376466	0	0	0	0	0	0	0	0	0
Ltv1	10;10;10;10;10;10;10;10;10;10;10	13178640;13179123;13179655;13179995;13180890;13182279;13182861;13185424;13190575;13192108;13193028	13178996;13179323;13179707;13180134;13181017;13182528;13182996;13185511;13190745;13192239;13193137	-;-;-;-;-;-;-;-;-;-;-	1766	55.9309	54.2845	50.6742	49.4536	53.5807	47.9697	55.5693	56.6995	50.7862	51.6607	50.7404	51.5435
Phactr2	10;10;10;10;10;10;10;10;10;10;10;10;10;10;10;10;10;10;10;10;10;10;10;10;10;10;10;10;10;10;10;10;10;10;10;10;10;10;10;10;10;10;10;10;10;10;10;10;10;10;10;10;10;10;10;10;10;10;10;10;10;10;10;10;10;10;10;10;10	13207717;13213395;13213395;13213397;13214258;13224784;13224784;13224784;13224784;13224784;13232539;13232539;13232539;13232539;13232539;13234150;13234150;13234150;13234150;13234150;13239910;13239910;13239910;13239910;13239910;13245411;13245411;13245411;13245411;13245411;13247002;13247002;13247002;13247002;13247002;13253342;13253342;13253342;13253342;13253342;13255310;13255310;13255310;13257577;132…	13214273;13214273;13214273;13214273;13214273;13224860;13224860;13224860;13224860;13224860;13232676;13232676;13232676;13232676;13232676;13234211;13234211;13234211;13234211;13234211;13239965;13239965;13239965;13239965;13239965;13245567;13245567;13245567;13245567;13245567;13247195;13247195;13247195;13247195;13247195;13253879;13253879;13253879;13253879;13253879;13255321;13255321;13255321;13257816;132…	-;-;-;-;-;-;-;-;-;-;-;-;-;-;-;-;-;-;-;-;-;-;-;-;-;-;-;-;-;-;-;-;-;-;-;-;-;-;-;-;-;-;-;-;-;-;-;-;-;-;-;-;-;-;-;-;-;-;-;-;-;-;-;-;-;-;-;-;-	11688	12.7923	12.516	11.128	14.6099	10.3836	13.1869	11.1208	14.0195	7.70992	12.9288	11.5302	16.8785
Fuca2	10;10;10;10;10;10;10;10;10;10;10;10;10;10;10;10;10;10;10;10;10;10;10;10;10;10	13499540;13499544;13501001;13501001;13501003;13501084;13503071;13503071;13503071;13503071;13505739;13505739;13505739;13506037;13506706;13506706;13507235;13507235;13507235;13512618;13512618;13512618;13514707;13514707;13514755;13515117	13499587;13499587;13501373;13501373;13501177;13501373;13503258;13503258;13503258;13503258;13506078;13505880;13506078;13506078;13506916;13506916;13507425;13507425;13507425;13513098;13512726;13512726;13519035;13514874;13515498;13515543	+;+;+;+;+;+;+;+;+;+;+;+;+;+;+;+;+;+;+;+;+;+;+;+;+;+	6161	2.50087	2.21145	2.33725	1.87003	2.75455	1.77703	1.90798	2.22857	2.52686	2.18993	1.9245	2.13715
Pex3	10;10;10;10;10;10;10;10;10;10;10;10;10;10;10;10;10;10;10;10;10;10;10;10;10;10;10;10;10;10;10;10;10;10;10;10;10;10;10;10;10;10;10;10;10;10;10;10;10;10;10;10;10;10;10;10;10;10;10;10;10;10;10;10;10;10;10;10	13523842;13523847;13524116;13524142;13527741;13527741;13527741;13527741;13528967;13531258;13531258;13531258;13531258;13531266;13532340;13532340;13532340;13532340;13532340;13532340;13534672;13534672;13534672;13534672;13534672;13534672;13535555;13535555;13535555;13535555;13535555;13535555;13535709;13535709;13535709;13535709;13535709;13535709;13535727;13535943;13535943;13535943;13535943;13535943;135…	13523943;13523943;13524968;13524968;13527837;13527837;13527837;13527837;13531380;13531380;13531380;13531380;13531380;13531380;13532410;13532410;13532410;13532410;13532410;13532410;13534837;13534837;13534837;13534837;13534837;13534837;13535609;13535609;13535609;13535609;13535609;13535609;13535775;13535961;13535775;13535775;13535775;13535775;13535775;13536067;13536067;13536067;13536067;13536067;135…	-;-;-;-;-;-;-;-;-;-;-;-;-;-;-;-;-;-;-;-;-;-;-;-;-;-;-;-;-;-;-;-;-;-;-;-;-;-;-;-;-;-;-;-;-;-;-;-;-;-;-;-;-;-;-;-;-;-;-;-;-;-;-;-;-;-;-;-	4740	1.59806	2.01399	2.31419	1.68191	2.14608	2.1299	1.89047	2.3059	2.15222	2.15065	1.84149	2.0448
Adat2	10;10;10;10;10;10	13552894;13556852;13560114;13561704;13562637;13562815	13553361;13556956;13560264;13561810;13562709;13563376	+;+;+;+;+;+	1466	5.34315	6.84809	7.25133	6.03455	7.145	7.3457	6.93399	7.60969	4.71166	7.09976	5.78199	7.14159
Aig1	10;10;10;10;10;10;10;10;10;10;10;10;10;10;10;10;10;10;10;10;10;10;10;10;10;10;10;10;10;10;10	13647054;13647669;13652451;13653586;13653586;13653588;13690524;13690524;13690524;13690524;13798147;13801848;13801848;13801848;13801848;13826504;13829243;13829243;13829243;13829243;13829243;13829295;13829628;13844181;13855136;13861119;13868618;13868618;13868618;13868618;13868618	13647706;13647706;13653011;13653749;13653749;13653749;13690639;13690639;13690639;13690639;13801949;13801949;13801949;13801949;13801949;13829398;13829398;13829398;13829398;13829398;13829398;13829398;13829829;13844286;13855260;13861326;13868976;13868829;13868957;13868822;13868980	-;-;-;-;-;-;-;-;-;-;-;-;-;-;-;-;-;-;-;-;-;-;-;-;-;-;-;-;-;-;-	9196	0.552259	0.687188	0.603323	0.576088	0.766658	0.487929	0.68105	0.761267	0.537339	0.759206	0.49928	0.601561
Hivep2	10;10;10;10;10;10;10;10;10;10;10;10;10;10;10;10;10;10;10;10;10;10;10;10;10;10;10;10;10;10;10;10;10;10;10;10;10;10;10;10;10;10;10	13966075;13966379;13966379;13966646;13966961;13967024;14004201;14004201;14004201;14004201;14066583;14066583;14066583;14066583;14066583;14077011;14110665;14117519;14117519;14123018;14126452;14126452;14126452;14126452;14127293;14127293;14127293;14127293;14133740;14133740;14133740;14139385;14139385;14139385;14142241;14142241;14142241;14143059;14143059;14143059;14148912;14148912;14148912	13966220;13966697;13966697;13966697;13967092;13967080;14004275;14004275;14004826;14004275;14066684;14066684;14066684;14066684;14066684;14079675;14110786;14117600;14117600;14123200;14126496;14126496;14126496;14126496;14128780;14132798;14132798;14132798;14133894;14133894;14133894;14139560;14139560;14139560;14142342;14142342;14142342;14143954;14143954;14143954;14151374;14151373;14150589	+;+;+;+;+;+;+;+;+;+;+;+;+;+;+;+;+;+;+;+;+;+;+;+;+;+;+;+;+;+;+;+;+;+;+;+;+;+;+;+;+;+;+	13720	1.86334	2.24418	2.1701	2.36552	2.49223	2.40375	1.77677	1.58342	2.43203	2.2103	2.31312	1.6728
Adgrg6	10;10;10;10;10;10;10;10;10;10;10;10;10;10;10;10;10;10;10;10;10;10;10;10;10;10;10;10;10;10;10;10;10;10;10;10;10;10;10;10;10;10;10;10;10;10;10;10;10;10;10;10;10;10;10	14402583;14407866;14407898;14409673;14409673;14410456;14410456;14420426;14420426;14422673;14422673;14426736;14426736;14428090;14428090;14431606;14431606;14432921;14432921;14434278;14434278;14436780;14436780;14438420;14438420;14439610;14439610;14440338;14440338;14441393;14441393;14444006;14444006;14448063;14448063;14448818;14448818;14450579;14450579;14456138;14458080;14458080;14467133;14467133;144…	14405438;14407911;14407911;14409825;14409825;14410557;14410557;14420709;14420709;14422769;14422769;14427004;14427004;14428217;14428217;14431712;14431712;14432966;14432966;14434397;14434397;14436920;14436920;14438591;14438591;14439820;14439820;14440393;14440393;14441504;14441504;14444148;14444148;14448128;14448128;14448870;14448870;14450664;14450664;14456221;14458148;14458148;14467756;14467756;144…	-;-;-;-;-;-;-;-;-;-;-;-;-;-;-;-;-;-;-;-;-;-;-;-;-;-;-;-;-;-;-;-;-;-;-;-;-;-;-;-;-;-;-;-;-;-;-;-;-;-;-;-;-;-;-	11748	0.249118	0.190749	0.0973369	0.188259	0.240047	0.114581	0.176335	0.165314	0.104023	0.145837	0.133137	0.105074
Vta1	10;10;10;10;10;10;10;10;10;10;10;10;10;10;10;10;10;10;10;10;10;10;10;10;10;10;10;10;10;10;10;10;10	14654755;14655355;14655663;14655788;14655839;14661066;14661066;14661066;14661066;14667932;14667932;14667932;14667932;14667932;14675934;14675934;14675934;14684064;14684064;14684064;14684064;14684881;14684881;14684881;14684881;14686308;14687614;14687614;14687614;14705350;14705350;14705350;14705350	14655845;14655845;14655845;14655845;14655845;14661152;14661152;14661152;14661152;14668261;14668108;14668108;14668108;14668108;14676042;14676042;14676042;14684093;14684139;14684139;14684139;14685008;14685008;14685008;14685008;14686443;14687708;14687708;14687708;14705465;14705459;14705500;14705560	-;-;-;-;-;-;-;-;-;-;-;-;-;-;-;-;-;-;-;-;-;-;-;-;-;-;-;-;-;-;-;-;-	2263	10.0037	10.3777	9.93774	9.47768	10.8817	10.2112	10.6444	10.6975	9.64987	12.2459	11.1032	10.0205
Nmbr	10;10;10;10;10;10;10;10;10;10;10;10;10;10;10;10;10;10;10;10;10;10;10;10;10;10;10;10;10;10;10	14705591;14705597;14705609;14705621;14705627;14719827;14719827;14719827;14719827;14734803;14734803;14734803;14734803;14735006;14753281;14753281;14753281;14757136;14758654;14760157;14760219;14760219;14766677;14766677;14766677;14766677;14767147;14769958;14770155;14770155;14770155	14705673;14705673;14705673;14705673;14705673;14720451;14720042;14720042;14720042;14734912;14734912;14734912;14734912;14735063;14753324;14753358;14753358;14757210;14759019;14760710;14760710;14760710;14767025;14767025;14767025;14766771;14767296;14770041;14770583;14770583;14770850	+;+;+;+;+;+;+;+;+;+;+;+;+;+;+;+;+;+;+;+;+;+;+;+;+;+;+;+;+;+;+	3228	0	0.0138842	0.0262406	0.0159337	0.0156005	0.0139002	0.0149246	0.0279834	0.0329201	0.039807	0.0156303	0.0566526
Cited2	10;10	17723228;17723938	17723459;17725673	+;+	1968	149.148	87.9058	121.612	124.691	92.938	149.726	115.031	96.7334	152.487	97.352	114.292	109.325
Txlnb	10;10;10;10;10;10;10;10;10;10;10;10;10	17796226;17796256;17799088;17799088;17806765;17806765;17815229;17827792;17830236;17833278;17838908;17841426;17842698	17796421;17796421;17799533;17799533;17807908;17806856;17815399;17827986;17830355;17833352;17839000;17841521;17845665	+;+;+;+;+;+;+;+;+;+;+;+;+	5504	0.602105	0.765429	0.70023	0.672829	0.603863	0.750007	0.647721	0.664677	0.868817	1.09727	0.733353	0.656209
Heca	10;10;10;10	17900466;17908034;17914992;17947509	17902377;17908188;17916032;17948067	-;-;-;-	3667	4.50692	4.99882	4.49279	5.75074	4.16106	6.14255	5.82006	5.78883	4.02808	5.64167	5.0496	6.19639
Abracl	10;10;10	18011263;18018839;18023067	18011816;18018905;18023252	-;-;-	807	23.9993	18.1606	17.9486	21.4787	18.3462	15.4571	21.7898	21.7151	20.1471	18.2581	17.8811	22.2645
Reps1	10;10;10;10;10;10;10;10;10;10;10;10;10;10;10;10;10;10;10;10;10;10;10;10;10;10;10;10;10;10;10;10;10;10;10;10;10;10;10;10;10;10;10;10;10;10;10;10;10;10;10;10;10;10;10;10;10;10;10;10;10;10;10;10;10;10;10;10;10;10;10;10;10;10;10;10;10;10;10;10;10;10;10;10;10;10;10;10;10;10;10;10;10;10;10;10;10;10;10;10;10;10;10;10;10;10;10;10;10;10;10;10;10;10;10;10;10;10;10;10;10;10;10;10;10;10;10;10	18055861;18055906;18055940;18055940;18055959;18056004;18089448;18089448;18089448;18089448;18089448;18089448;18091468;18092186;18092845;18092845;18092845;18092845;18092845;18092845;18093170;18093170;18093170;18093170;18093170;18093170;18093170;18093171;18093779;18093779;18093779;18093779;18093779;18093779;18093779;18094410;18094410;18094410;18094410;18094410;18094410;18094531;18094845;18094845;180…	18056115;18056115;18056115;18056115;18056115;18056115;18089571;18089571;18089571;18089571;18089571;18089571;18093041;18092305;18093041;18093041;18093041;18093041;18093041;18093041;18093323;18093323;18093323;18093323;18093323;18093323;18093323;18093323;18093903;18093840;18093837;18093903;18093903;18093903;18093903;18094572;18094572;18094572;18094572;18094572;18094572;18094572;18094908;18094908;180…	+;+;+;+;+;+;+;+;+;+;+;+;+;+;+;+;+;+;+;+;+;+;+;+;+;+;+;+;+;+;+;+;+;+;+;+;+;+;+;+;+;+;+;+;+;+;+;+;+;+;+;+;+;+;+;+;+;+;+;+;+;+;+;+;+;+;+;+;+;+;+;+;+;+;+;+;+;+;+;+;+;+;+;+;+;+;+;+;+;+;+;+;+;+;+;+;+;+;+;+;+;+;+;+;+;+;+;+;+;+;+;+;+;+;+;+;+;+;+;+;+;+;+;+;+;+;+;+	5564	5.40692	5.44521	4.23219	5.46325	4.57064	4.70151	6.34675	6.45333	4.73651	5.25011	4.95116	5.61212
Ect2l	10;10;10;10;10;10;10;10;10;10;10;10;10;10;10;10;10;10;10;10;10;10;10;10;10;10;10;10;10;10;10;10;10;10;10;10;10;10;10;10;10;10;10;10;10;10;10;10;10;10;10;10;10;10;10;10;10;10;10;10;10;10;10;10;10;10;10;10;10;10;10;10;10;10;10;10;10;10;10;10;10;10;10;10;10;10;10;10;10;10;10;10;10;10	18128903;18129022;18129022;18129022;18129022;18130593;18130593;18130593;18130593;18130593;18136906;18136906;18136906;18136906;18136906;18138808;18138808;18138808;18138808;18138808;18139005;18140260;18140260;18140260;18140260;18140513;18140513;18140513;18140513;18141828;18141828;18141828;18141828;18142893;18142893;18142893;18142893;18143068;18144556;18144556;18144556;18144556;18144556;18145376;181…	18129146;18129146;18129146;18129146;18129146;18130765;18130765;18130765;18130765;18130765;18136994;18136994;18136994;18136994;18136994;18138873;18138873;18138873;18138873;18138867;18139114;18140416;18140416;18140416;18140416;18140586;18140586;18140586;18140586;18141975;18141975;18141975;18141975;18143107;18143107;18143107;18143107;18143107;18144642;18144642;18144642;18144642;18144642;18145661;181…	-;-;-;-;-;-;-;-;-;-;-;-;-;-;-;-;-;-;-;-;-;-;-;-;-;-;-;-;-;-;-;-;-;-;-;-;-;-;-;-;-;-;-;-;-;-;-;-;-;-;-;-;-;-;-;-;-;-;-;-;-;-;-;-;-;-;-;-;-;-;-;-;-;-;-;-;-;-;-;-;-;-;-;-;-;-;-;-;-;-;-;-;-;-	4257	0.0505506	0.0631689	0.0198978	0.0241645	0.0591478	0.0527014	0.033951	0.0212193	0.0624066	0.0503081	0.130374	0.0751775
Ccdc28a	10;10;10;10;10;10;10;10;10;10;10;10;10;10;10;10;10;10;10;10;10;10;10;10;10;10	18213676;18213682;18213775;18214058;18214078;18216193;18216260;18216260;18216260;18216260;18216784;18219488;18219488;18219488;18219488;18219488;18224897;18224897;18224897;18224897;18227431;18230419;18230419;18234852;18234852;18234852	18214178;18214178;18214178;18214178;18214178;18216282;18216335;18216282;18216282;18216282;18218392;18219642;18219614;18219642;18219642;18219642;18225060;18225060;18225060;18225060;18227473;18230618;18230618;18234978;18234998;18234996	-;-;-;-;-;-;-;-;-;-;-;-;-;-;-;-;-;-;-;-;-;-;-;-;-;-	2964	4.8208	4.00703	4.75821	4.63323	4.11159	5.66173	4.68111	4.419	4.51738	4.19074	4.54501	4.76622
Nhsl1	10;10;10;10;10;10;10;10;10;10;10;10;10;10;10;10;10;10;10;10;10;10;10;10;10;10;10;10;10;10;10;10;10;10;10;10;10;10;10;10;10;10;10;10;10;10	18318985;18390322;18407638;18407675;18407675;18408415;18418716;18419245;18469888;18469968;18469981;18469981;18472919;18472919;18472919;18472919;18472919;18472919;18472919;18472919;18498033;18498033;18498033;18498033;18498033;18498033;18498033;18511550;18511550;18511550;18511550;18511550;18511550;18516029;18516029;18523791;18523791;18523791;18523791;18523791;18527536;18527536;18527536;18531268;185…	18319276;18390510;18407854;18408514;18408514;18408514;18418794;18421140;18470165;18470087;18470165;18470165;18473071;18473071;18473427;18473071;18473071;18473071;18473071;18473071;18498078;18498157;18498157;18498157;18498157;18498157;18498157;18512510;18511742;18511742;18511742;18511742;18511742;18516160;18516160;18524289;18527042;18525959;18527042;18527042;18527668;18527668;18527668;18533889;185…	+;+;+;+;+;+;+;+;+;+;+;+;+;+;+;+;+;+;+;+;+;+;+;+;+;+;+;+;+;+;+;+;+;+;+;+;+;+;+;+;+;+;+;+;+;+	11348	0.815415	0.908372	0.918107	1.23735	1.10054	0.94896	1.01464	0.959184	0.767872	1.22292	1.02261	1.08777
Hebp2	10;10;10;10;10;10;10;10;10;10;10	18539498;18540758;18542870;18544265;18544383;18545078;18545078;18545078;18545694;18545694;18545694	18541332;18541332;18544445;18544445;18544445;18545213;18545213;18545213;18545887;18546064;18546076	-;-;-;-;-;-;-;-;-;-;-	3930	0.635177	0.46757	0.657378	0.889953	0.691949	0.616534	0.625191	0.815962	0.87879	0.741118	0.552049	0.535129
Arfgef3	10;10;10;10;10;10;10;10;10;10;10;10;10;10;10;10;10;10;10;10;10;10;10;10;10;10;10;10;10;10;10;10;10;10;10;10;10;10;10;10;10;10;10;10;10;10;10;10;10;10;10;10;10;10;10;10;10;10;10;10;10;10;10;10;10;10;10	18581839;18589403;18591130;18594908;18594908;18597328;18597328;18597696;18597696;18599186;18599186;18600434;18600434;18603407;18603407;18607645;18607645;18608321;18608321;18611204;18611204;18613138;18613138;18616849;18616849;18619648;18619648;18621126;18621126;18625148;18625148;18627621;18627621;18630031;18630031;18630280;18630280;18630819;18630819;18634763;18634763;18635680;18635680;18646161;186…	18589772;18589772;18592342;18595029;18595029;18597459;18597459;18597798;18597798;18599300;18599300;18600610;18600610;18603535;18603535;18607789;18607789;18608424;18608424;18611326;18611326;18613282;18613282;18617028;18617028;18619793;18619793;18621259;18621259;18625465;18625465;18627771;18627771;18630141;18630141;18630495;18630495;18630926;18630926;18634928;18634928;18635846;18635846;18647059;186…	-;-;-;-;-;-;-;-;-;-;-;-;-;-;-;-;-;-;-;-;-;-;-;-;-;-;-;-;-;-;-;-;-;-;-;-;-;-;-;-;-;-;-;-;-;-;-;-;-;-;-;-;-;-;-;-;-;-;-;-;-;-;-;-;-;-;-	14579	0.0915153	0.132189	0.104581	0.102311	0.096717	0.101565	0.142094	0.0774491	0.0838232	0.11458	0.0795979	0.0815341
Gm4922	10;10;10;10;10;10	18779725;18779813;18783437;18783437;18785694;18786657	18780187;18780187;18785010;18785011;18785876;18786793	-;-;-;-;-;-	2358	0	0	0	0.0218126	0	0.0190288	0	0	0	0.054494	0	0
Perp	10;10;10	18845020;18853537;18855650	18845406;18853677;18857073	+;+;+	1952	10.6715	6.77326	4.25259	7.00894	5.28867	3.83877	10.5633	13.2812	5.44395	6.69254	3.98055	8.85331
Tnfaip3	10;10;10;10;10;10;10;10;10;10;10;10;10;10;10;10;10;10;10;10;10;10;10;10;10;10;10;10;10;10;10	19000910;19000913;19000929;19003576;19003576;19003576;19004457;19004457;19005551;19005551;19005551;19006863;19006863;19007182;19007182;19007182;19007267;19008145;19008145;19008145;19008145;19008266;19011481;19011481;19011481;19011481;19011516;19014402;19015153;19015153;19015548	19003015;19003015;19003015;19005331;19003757;19003757;19005331;19005331;19007033;19005731;19005731;19007033;19007033;19007329;19007329;19007329;19007329;19008845;19008335;19008335;19008335;19008335;19011790;19011963;19011790;19011790;19011790;19014582;19015376;19015410;19015657	-;-;-;-;-;-;-;-;-;-;-;-;-;-;-;-;-;-;-;-;-;-;-;-;-;-;-;-;-;-;-	7226	0.375234	0.626439	0.427861	0.68332	0.327546	0.428457	0.46003	0.631288	0.455888	0.420854	0.363084	0.537792
Olig3	10	19356533	19358604	+	2072	0.0207716	0.108152	0	0	0.558999	0.0433108	0	0	0.07693	0.186048	0.0974029	0.022065
Ifngr1	10;10;10;10;10;10;10;10;10;10;10;10;10;10;10;10;10;10;10;10;10;10	19591949;19591958;19592031;19592053;19592062;19597416;19597416;19597416;19597416;19599039;19601320;19601320;19601320;19601320;19603754;19603754;19605919;19606234;19607257;19607257;19609137;19609137	19592197;19592197;19592197;19592197;19592197;19597530;19597516;19597851;19597530;19599137;19601403;19601483;19601483;19601483;19603774;19603932;19606420;19606420;19607381;19607381;19609256;19610229	+;+;+;+;+;+;+;+;+;+;+;+;+;+;+;+;+;+;+;+;+;+	2847	17.0976	18.3555	17.8216	21.1011	15.601	17.6359	18.5463	20.6868	19.204	19.0767	17.917	20.3943
Il22ra2	10;10;10;10;10	19621998;19624401;19626629;19631614;19632769	19622097;19624536;19626807;19631783;19634681	+;+;+;+;+	2498	0	0.0358834	0.0169545	0	0	0	0.038572	0.0361611	0	0	0	0
Il20ra	10;10;10;10;10;10;10;10;10;10;10;10;10;10;10	19712570;19712634;19742903;19742903;19744546;19749208;19749208;19749786;19750642;19750642;19751443;19751443;19755786;19755786;19758886	19712730;19712730;19743038;19743038;19744670;19749386;19749386;19749983;19750817;19750817;19751587;19751587;19755824;19755925;19760053	+;+;+;+;+;+;+;+;+;+;+;+;+;+;+	2428	0.035452	0.0184589	0.0174433	0.0211837	0	0.0554407	0.019842	0.0186018	0	0.017641	0.0207804	0.0564893
Slc35d3	10;10	19847916;19850584	19849669;19851459	-;-	2630	0.0327291	0.0340824	0.0966214	0.136897	0.0765908	0.0511825	0.109908	0.0515193	0.101013	0.130288	0.13429	0.104301
Pex7	10;10;10;10;10;10;10;10;10;10;10;10;10;10;10;10;10;10;10;10;10;10	19853900;19860789;19860832;19869294;19869294;19869294;19884778;19884778;19887060;19887060;19888656;19888656;19894250;19894250;19894725;19903538;19904563;19904563;19905845;19905845;19907459;19907459	19860994;19860994;19860994;19869674;19869393;19869393;19884833;19884833;19887173;19887173;19888762;19888762;19894358;19894358;19894802;19907651;19904713;19904713;19905902;19905902;19907647;19907689	-;-;-;-;-;-;-;-;-;-;-;-;-;-;-;-;-;-;-;-;-;-	12092	0.78304	0.819124	0.686492	0.820937	0.757959	0.753275	0.717149	0.776907	0.883206	0.804079	0.755235	0.718371
Map3k5	10;10;10;10;10;10;10;10;10;10;10;10;10;10;10;10;10;10;10;10;10;10;10;10;10;10;10;10;10;10;10;10;10;10;10;10;10;10;10;10;10;10;10;10;10;10;10;10;10;10;10;10;10;10;10;10;10;10;10;10;10;10;10;10;10;10;10;10;10;10;10;10;10;10;10;10	19934472;19934526;19935223;19951055;20000566;20000566;20000566;20019558;20019558;20023608;20023608;20023608;20024885;20024885;20026181;20026181;20029033;20029033;20046372;20046372;20056475;20056475;20058937;20058937;20067829;20067829;20076482;20076482;20076482;20079242;20079242;20079242;20082387;20082387;20082387;20094362;20094362;20094362;20099505;20099505;20099505;20099525;20100061;20100061;201…	19935074;19935074;19935423;19951176;20000705;20000705;20000705;20019581;20019581;20023699;20023801;20023801;20025053;20025053;20026287;20026287;20029203;20029203;20046484;20046484;20056634;20056634;20059090;20059090;20067936;20067936;20076531;20076531;20076531;20079337;20079337;20079337;20082468;20082468;20082468;20094495;20094495;20094495;20099632;20099632;20099632;20099632;20100197;20100158;201…	+;+;+;+;+;+;+;+;+;+;+;+;+;+;+;+;+;+;+;+;+;+;+;+;+;+;+;+;+;+;+;+;+;+;+;+;+;+;+;+;+;+;+;+;+;+;+;+;+;+;+;+;+;+;+;+;+;+;+;+;+;+;+;+;+;+;+;+;+;+;+;+;+;+;+;+	6086	20.8122	18.0422	17.6341	17.2067	14.5383	17.0456	19.4099	19.7626	15.0948	18.9881	19.5071	23.573
Map7	10;10;10;10;10;10;10;10;10;10;10;10;10;10;10;10;10;10;10;10;10;10;10;10;10;10;10;10;10;10;10;10;10;10;10;10;10;10;10;10;10;10;10;10;10;10;10;10;10;10;10;10;10;10;10;10;10;10;10;10;10;10;10;10;10;10;10;10;10;10;10;10;10;10;10;10;10;10;10;10;10	20148471;20148984;20148995;20148998;20170780;20170988;20171022;20171706;20172007;20229795;20230784;20230784;20230784;20230784;20230784;20230784;20230784;20230784;20230784;20233369;20233369;20233369;20233369;20233369;20233369;20233369;20233369;20233369;20245270;20245270;20245270;20245270;20245270;20245270;20245270;20246598;20246598;20246598;20246598;20246598;20250370;20250370;20250370;20250370;202…	20149080;20149080;20149080;20149080;20172679;20171321;20171321;20171741;20172144;20229898;20230882;20230882;20230882;20230882;20230882;20230882;20230882;20230882;20230882;20233446;20233446;20233491;20233446;20233446;20233446;20233858;20233446;20233446;20245389;20245433;20245433;20245402;20245433;20245433;20245433;20246715;20246715;20246715;20246715;20246715;20250481;20250480;20250480;20250480;202…	+;+;+;+;+;+;+;+;+;+;+;+;+;+;+;+;+;+;+;+;+;+;+;+;+;+;+;+;+;+;+;+;+;+;+;+;+;+;+;+;+;+;+;+;+;+;+;+;+;+;+;+;+;+;+;+;+;+;+;+;+;+;+;+;+;+;+;+;+;+;+;+;+;+;+;+;+;+;+;+;+	7935	7.47958	5.34883	6.31416	8.49132	5.38807	6.19754	7.29174	7.11487	5.78537	5.61921	6.25041	7.31729
Bclaf1	10;10;10;10;10;10;10;10;10;10;10;10;10;10;10;10;10;10;10;10;10;10;10;10;10;10;10;10;10;10;10;10;10;10;10;10;10;10;10;10;10;10;10;10;10;10;10;10;10;10;10;10;10;10;10;10;10;10;10;10;10;10;10;10;10;10;10;10;10;10;10;10;10;10;10;10;10;10;10;10;10;10;10;10;10;10;10;10;10;10	20312469;20312472;20312484;20312528;20312529;20312532;20312537;20315954;20318008;20318008;20318008;20318008;20318008;20318008;20322003;20322003;20322003;20322003;20322003;20322003;20322963;20322963;20322963;20322969;20322969;20323720;20325140;20325140;20325140;20325140;20325140;20325140;20325930;20325930;20325930;20325930;20325930;20325930;20326045;20327164;20328102;20328102;20328102;20328102;203…	20312604;20312604;20312604;20312604;20312604;20315595;20312604;20319941;20318111;20318111;20318111;20318111;20318111;20318111;20322595;20322116;20322116;20322116;20322116;20322116;20323868;20323868;20323868;20323868;20323868;20323868;20325805;20325805;20325805;20325805;20325805;20325805;20326099;20326099;20326099;20326099;20326099;20326099;20326099;20327391;20328207;20328207;20328207;20328207;203…	+;+;+;+;+;+;+;+;+;+;+;+;+;+;+;+;+;+;+;+;+;+;+;+;+;+;+;+;+;+;+;+;+;+;+;+;+;+;+;+;+;+;+;+;+;+;+;+;+;+;+;+;+;+;+;+;+;+;+;+;+;+;+;+;+;+;+;+;+;+;+;+;+;+;+;+;+;+;+;+;+;+;+;+;+;+;+;+;+;+	15301	51.7022	48.5764	49.5906	45.0271	44.1447	48.345	52.7387	52.7631	48.7715	47.8878	54.6953	45.6589
Mtfr2	10;10;10;10;10;10;10;10;10;10;10;10;10;10;10;10;10;10;10	20347770;20347819;20348007;20348335;20348335;20348335;20352824;20352824;20353367;20353367;20353367;20354030;20354030;20354030;20357255;20357255;20357255;20360535;20360535	20347923;20347923;20348155;20348435;20348435;20348435;20352928;20352928;20353479;20353479;20353479;20354265;20354265;20354265;20357351;20357766;20357766;20360895;20361304	+;+;+;+;+;+;+;+;+;+;+;+;+;+;+;+;+;+;+	2140	3.11729	3.72788	3.56235	2.40346	2.72971	2.68381	4.57001	4.41099	3.4015	3.42258	3.39508	3.86686
Pde7b	10;10;10;10;10;10;10;10;10;10;10;10;10;10;10;10;10;10;10;10;10;10;10;10;10;10;10;10;10;10;10;10;10;10;10;10;10;10;10;10;10;10;10;10;10;10;10;10;10;10;10;10;10;10;10;10;10;10;10;10;10;10;10;10;10;10;10;10;10	20398004;20398928;20400418;20400418;20407087;20407128;20407128;20407128;20407128;20410343;20410343;20410343;20410343;20410343;20412996;20412996;20412996;20412996;20412996;20418732;20418732;20418732;20418732;20418732;20434465;20434465;20434465;20434465;20434465;20436196;20436196;20436196;20436196;20436196;20438725;20438725;20438725;20438725;20438725;20440765;20440765;20440765;20440765;20440765;204…	20400632;20400632;20400632;20400632;20407208;20407208;20407208;20407208;20407208;20410439;20410439;20410439;20410439;20410439;20413140;20413140;20413140;20413140;20413140;20418823;20418823;20418823;20418823;20418823;20434596;20434596;20434596;20434596;20434596;20436296;20436296;20436296;20436296;20436296;20438820;20438820;20438820;20438820;20438820;20440828;20440828;20440828;20440828;20440828;204…	-;-;-;-;-;-;-;-;-;-;-;-;-;-;-;-;-;-;-;-;-;-;-;-;-;-;-;-;-;-;-;-;-;-;-;-;-;-;-;-;-;-;-;-;-;-;-;-;-;-;-;-;-;-;-;-;-;-;-;-;-;-;-;-;-;-;-;-;-	12444	2.52823	1.81521	1.56898	2.21955	1.85344	2.08412	2.79132	2.93625	1.53712	2.09618	1.84076	2.29255
Ahi1	10;10;10;10;10;10;10;10;10;10;10;10;10;10;10;10;10;10;10;10;10;10;10;10;10;10;10;10;10;10;10;10;10;10;10;10;10;10;10;10;10;10;10;10;10;10;10;10;10;10;10;10;10;10;10;10;10;10;10;10;10;10;10;10;10;10;10;10;10;10;10;10	20952547;20952625;20959612;20959684;20963065;20963065;20963673;20963673;20965517;20965517;20965926;20965926;20968988;20968988;20970849;20970849;20972024;20972024;20976997;20976997;20979380;20979380;20981324;20981324;20984305;20984305;20986970;20986970;20988544;20988544;21000506;21000506;21000537;21007752;21007752;21017913;21017913;21017913;21040820;21040820;21041186;21041186;21041186;21041186;210…	20952752;20953999;20960080;20960080;20963234;20963234;20963892;20963892;20965709;20965709;20966021;20966021;20969173;20969173;20971001;20971001;20972156;20972156;20977120;20977120;20979609;20979609;20981430;20981430;20984423;20984423;20987100;20987100;20988684;20988684;21000705;21000705;21000705;21007778;21007778;21018033;21018033;21018033;21041062;21041062;21041241;21041241;21041241;21041241;210…	+;+;+;+;+;+;+;+;+;+;+;+;+;+;+;+;+;+;+;+;+;+;+;+;+;+;+;+;+;+;+;+;+;+;+;+;+;+;+;+;+;+;+;+;+;+;+;+;+;+;+;+;+;+;+;+;+;+;+;+;+;+;+;+;+;+;+;+;+;+;+;+	7040	3.60694	3.62875	3.76599	3.16349	3.09733	4.51249	2.82626	2.19411	3.04156	3.34627	2.98858	4.47446
Myb	10;10;10;10;10;10;10;10;10;10;10;10;10;10;10;10;10;10;10;10;10;10;10;10;10;10;10;10;10;10;10;10;10;10;10;10;10;10;10;10;10;10;10;10;10;10;10;10;10	21124935;21125276;21138893;21139293;21139293;21140567;21140567;21140567;21141759;21141759;21141759;21141972;21141972;21141972;21142962;21142962;21142962;21143529;21144969;21146186;21146186;21146186;21146894;21148332;21148332;21148332;21148778;21148778;21148778;21150306;21150306;21150306;21152436;21152436;21152436;21152892;21152892;21152892;21154684;21154684;21154684;21156340;21156340;21156340;211…	21126289;21126289;21139400;21139400;21139400;21140677;21140677;21140677;21141884;21141884;21141884;21142086;21142086;21142086;21143092;21143092;21143092;21146761;21145325;21146440;21146440;21146440;21149147;21148436;21148436;21148436;21148858;21148858;21148858;21150540;21150540;21150540;21152656;21152656;21152656;21152984;21152984;21152984;21154755;21154755;21154755;21156457;21156457;21156457;211…	-;-;-;-;-;-;-;-;-;-;-;-;-;-;-;-;-;-;-;-;-;-;-;-;-;-;-;-;-;-;-;-;-;-;-;-;-;-;-;-;-;-;-;-;-;-;-;-;-	8933	0.0674513	0.0903089	0.0758578	0.0575776	0.0620109	0.0652983	0.0701101	0.040448	0.0475836	0.0719226	0.0677775	0.0562975
Hbs1l	10;10;10;10;10;10;10;10;10;10;10;10;10;10;10;10;10;10;10;10;10;10;10	21295979;21295979;21299178;21299178;21304530;21304530;21307585;21307585;21309099;21336967;21341714;21342399;21345077;21347262;21349312;21351927;21352542;21354639;21358313;21358732;21364675;21367642;21368289	21296176;21296176;21299243;21299243;21304643;21304643;21307779;21307779;21311198;21337075;21341979;21342564;21345194;21347408;21349386;21352044;21352610;21354743;21358403;21358840;21364775;21367786;21368889	+;+;+;+;+;+;+;+;+;+;+;+;+;+;+;+;+;+;+;+;+;+;+	4893	6.5706	7.45598	7.08902	6.94827	7.17348	8.4733	7.26634	6.37833	6.26563	7.41446	7.17688	7.1012
Aldh8a1	10;10;10;10;10;10;10;10;10;10;10;10;10;10;10	21377291;21377300;21377347;21380830;21380830;21380830;21382292;21382292;21384636;21384636;21384636;21388938;21389068;21391567;21395388	21377478;21377478;21377478;21382447;21380977;21380977;21382447;21382447;21384785;21385542;21384785;21388996;21389324;21391728;21396585	+;+;+;+;+;+;+;+;+;+;+;+;+;+;+	4389	0.166703	0.194019	0.241242	0.257815	0.33274	0.306698	0.285393	0.288135	0.363178	0.439155	0.333376	0.916665
Sgk1	10;10;10;10;10;10;10;10;10;10;10;10;10;10;10;10;10;10;10;10;10;10;10;10;10;10;10;10;10;10;10;10;10;10;10;10;10;10;10;10;10;10;10;10;10;10;10;10;10;10;10;10;10;10;10;10;10;10;10;10;10;10;10;10;10;10;10;10;10;10;10;10;10;10;10;10;10;10;10;10;10;10;10;10;10;10;10;10;10;10;10;10;10;10;10	21882184;21882369;21898736;21928342;21928470;21969449;21969449;21978672;21978672;21990291;21992223;21992223;21993890;21994666;21994683;21994711;21994910;21994966;21994966;21994966;21994966;21994966;21994966;21994966;21994966;21994966;21995474;21995474;21995474;21995474;21995474;21995474;21995474;21995474;21995474;21995474;21995794;21995794;21995794;21995794;21995794;21995794;21995794;21995794;219…	21882707;21882707;21899145;21928551;21928551;21969524;21969524;21978982;21978982;21990402;21992407;21992407;21994181;21994825;21994825;21994825;21995041;21995041;21995041;21995041;21995041;21995041;21995041;21995041;21995041;21995041;21995549;21995601;21995549;21995549;21995549;21995549;21995549;21995549;21995549;21995549;21995898;21995898;21995898;21995898;21995874;21995898;21995893;21995898;219…	+;+;+;+;+;+;+;+;+;+;+;+;+;+;+;+;+;+;+;+;+;+;+;+;+;+;+;+;+;+;+;+;+;+;+;+;+;+;+;+;+;+;+;+;+;+;+;+;+;+;+;+;+;+;+;+;+;+;+;+;+;+;+;+;+;+;+;+;+;+;+;+;+;+;+;+;+;+;+;+;+;+;+;+;+;+;+;+;+;+;+;+;+;+;+	4903	4.95959	34.9095	18.2177	17.1202	37.6841	21.378	3.7928	4.10844	19.8206	31.2222	14.8802	4.95138
4930444G20Rik	10	22066307	22068079	-	1773	0	0.0252782	0	0	0	0	0	0	0	0	0	0
E030030I06Rik	10;10;10;10;10;10;10;10;10;10;10	22113050;22113050;22117362;22144302;22144421;22148489;22148489;22148489;22148489;22148489;22148489	22114348;22114348;22117856;22144514;22144514;22148610;22148819;22148823;22148697;22149270;22149270	-;-;-;-;-;-;-;-;-;-;-	2789	1.37341	1.01239	1.30595	1.06962	1.1917	1.17444	1.53736	1.58702	1.06685	1.15182	1.82715	1.45893
Raet1e	10;10;10;10;10;10;10;10;10;10;10;10;10;10;10;10;10;10;10;10;10;10;10;10;10;10;10;10;10	22158569;22165638;22171709;22172004;22172004;22173181;22173181;22173521;22173876;22173876;22173876;22173919;22174293;22174293;22174293;22174293;22180618;22180618;22180618;22180618;22181125;22181125;22181125;22181946;22181946;22181946;22183555;22183555;22373777	22158718;22165761;22171785;22172101;22172101;22173250;22173250;22173536;22173966;22173966;22173966;22173966;22174410;22174410;22174410;22174410;22180872;22180726;22180872;22180872;22181388;22181388;22181388;22182115;22182115;22182115;22183914;22183917;22374139	+;+;+;+;+;+;+;+;+;+;+;+;+;+;+;+;+;+;+;+;+;+;+;+;+;+;+;+;+	2159	1.0366	1.34932	1.47125	0.952923	1.1196	1.43401	1.18265	1.73632	1.00901	1.34905	1.16847	1.60936
H60b	10;10;10;10;10;10;10;10;10;10;10;10	22158586;22273346;22283448;22283448;22285691;22285691;22286140;22286140;22287054;22287054;22288715;22288715	22158718;22273529;22283563;22283563;22285876;22285876;22286403;22286403;22287248;22287248;22288849;22288849	+;+;+;+;+;+;+;+;+;+;+;+	1213	2.16436	1.95826	1.92035	1.90811	1.82669	1.77556	2.38301	2.34576	1.92733	2.57771	3.03643	2.37451
Raet1d	10;10;10;10;10;10;10;10;10;10;10;10;10;10;10	22360552;22361576;22361894;22362271;22362271;22362688;22362688;22370866;22370866;22371367;22371367;22372189;22372189;22373777;22373777	22360651;22361645;22361909;22362361;22362361;22362805;22362805;22371114;22371114;22371630;22371630;22372358;22372358;22374139;22374139	+;+;+;+;+;+;+;+;+;+;+;+;+;+;+	1441	2.47898	2.70589	2.5864	1.82036	2.72586	2.70901	3.24297	3.41638	2.83917	3.0913	2.59101	3.55343
Slc2a12	10;10;10;10;10;10;10	22645011;22649008;22664363;22664363;22692135;22693994;22702022	22645313;22649077;22664690;22665706;22692257;22694126;22704285	+;+;+;+;+;+;+	4237	1.14784	1.43859	1.29946	0.971141	0.891406	0.963693	1.48952	1.38576	1.04084	0.950256	0.714487	1.0035
Tbpl1	10;10;10;10;10;10;10;10;10;10;10;10;10;10;10;10;10;10	22703879;22705381;22705523;22706277;22707589;22707589;22707771;22707771;22709146;22709146;22709357;22709357;22711781;22711914;22711914;22731116;22731116;22731783	22705895;22705895;22705895;22706385;22707683;22707683;22707874;22707874;22709209;22709209;22709439;22709439;22712091;22712091;22712091;22731361;22731447;22731938	-;-;-;-;-;-;-;-;-;-;-;-;-;-;-;-;-;-	3271	5.03939	5.96025	5.39925	4.63866	4.27993	4.84228	5.80297	6.02019	4.58071	5.2902	4.58118	4.62638
Tcf21	10;10	22817279;22819454	22817826;22820128	-;-	1223	28.8215	21.1815	22.1285	24.981	18.4469	28.5436	32.1045	30.8734	27.7612	20.2079	22.2776	24.4107
Eya4	10;10;10;10;10;10;10;10;10;10;10;10;10;10;10;10;10;10;10;10;10;10;10;10;10;10;10;10;10;10;10;10;10;10;10;10;10;10	23104168;23104763;23109832;23109971;23111560;23111560;23113910;23113910;23116553;23116553;23116820;23116820;23123852;23123852;23138191;23138191;23139961;23139961;23151932;23151932;23155920;23155920;23157252;23157252;23157512;23157512;23159088;23159088;23163394;23163394;23172999;23172999;23226802;23226802;23323048;23323048;23349762;23349762	23106288;23106288;23109932;23110071;23111681;23111681;23114024;23114024;23116713;23116713;23116878;23116878;23123941;23123941;23138274;23138274;23140097;23140097;23152097;23152097;23155999;23155999;23157395;23157395;23157654;23157654;23159154;23159154;23163486;23163486;23173123;23173123;23226851;23226851;23323146;23323146;23349887;23349895	-;-;-;-;-;-;-;-;-;-;-;-;-;-;-;-;-;-;-;-;-;-;-;-;-;-;-;-;-;-;-;-;-;-;-;-;-;-	4192	0.390141	0.267285	0.444538	0.343548	0.396429	0.556593	0.287312	0.44174	0.215473	0.418923	0.710121	0.327185
Rps12	10;10;10;10;10;10	23785211;23785576;23785902;23786764;23786994;23787156	23785273;23785677;23786004;23786880;23787044;23787195	-;-;-;-;-;-	476	468.815	435.849	450.661	417.631	384.354	424.662	510.711	533.063	495.722	438.401	494.053	494.261
Slc18b1	10;10;10;10;10;10;10;10;10;10;10;10;10;10;10;10;10;10;10;10;10;10;10;10;10;10;10;10;10;10;10;10;10;10;10;10;10;10;10;10;10;10;10;10;10;10	23796986;23796986;23797052;23797200;23798746;23798746;23798746;23798746;23803758;23803758;23803758;23803758;23804188;23804188;23804188;23804188;23805038;23805893;23805893;23805893;23805893;23805976;23810789;23810789;23816287;23816293;23816293;23819060;23819060;23819060;23820814;23820814;23822923;23822923;23824487;23824686;23824686;23825947;23825947;23825947;23826143;23826143;23826143;23826594;238…	23797183;23797183;23797183;23797307;23798885;23798885;23798885;23798885;23803853;23803853;23803853;23803853;23804261;23804261;23804261;23804261;23805145;23805911;23805959;23806040;23806040;23806040;23810945;23810945;23816429;23816429;23816429;23819081;23819161;23819161;23820905;23820905;23823018;23823018;23824760;23824760;23824760;23826040;23826040;23826040;23826195;23826195;23826195;23827088;238…	+;+;+;+;+;+;+;+;+;+;+;+;+;+;+;+;+;+;+;+;+;+;+;+;+;+;+;+;+;+;+;+;+;+;+;+;+;+;+;+;+;+;+;+;+;+	3258	3.2497	3.38407	2.7169	3.33106	2.3649	3.09876	2.97221	3.92319	2.47889	2.91859	3.1902	3.11527
Vnn3	10;10;10;10;10;10;10	23851462;23851907;23856198;23864338;23865628;23867094;23869529	23851796;23852037;23856390;23864629;23865998;23867267;23869843	+;+;+;+;+;+;+	1811	0.308947	0.247478	0.420951	0.340811	0.389298	0.470751	0.106409	0.199515	0.528103	0.165558	0.362182	0.45441
Vnn1	10;10;10;10;10;10;10	23894688;23897293;23898408;23899394;23900585;23903386;23904478	23895091;23897423;23898600;23899685;23900943;23903556;23905343	+;+;+;+;+;+;+	2416	7.3572	8.38488	10.0973	5.3861	8.96281	9.9546	11.4658	11.6278	10.4683	8.2438	9.71086	7.38008
Taar1	10	23920356	23921469	+	1114	0	0	0	0	0	0	0	0.0405433	0	0	0.0452915	0
Taar2	10;10	23938572;23940588	23938595;23941583	+;+	1020	0	0.0439395	0	0	0.0493711	0	0	0	0	0	0	0
Taar4	10	23960494	23961537	+	1044	0	0	0	0	0	0	0	0	0	0.0820542	0	0
Taar7e	10	24037614	24038690	+	1077	0	0	0	0	0	0.041662	0	0	0	0	0	0
Taar8c	10	24100878	24101912	-	1035	0	0	0	0	0	0	0.0930946	0	0	0	0	0
Taar9	10	24108488	24109534	-	1047	0.0822135	0	0.0404512	0	0.0961958	0	0	0.0431377	0	0	0	0
Stx7	10;10;10;10;10;10;10;10;10;10	24149317;24155235;24177166;24179117;24179926;24180863;24181518;24182769;24184987;24187628	24149726;24155384;24177235;24179210;24180063;24180915;24181614;24182841;24185069;24188959	+;+;+;+;+;+;+;+;+;+	2500	11.0696	11.0432	10.334	12.447	10.4746	11.038	9.23061	9.2679	10.9454	11.2049	9.4653	9.96667
Moxd1	10;10;10;10;10;10;10;10;10;10;10;10;10;10	24223517;24223545;24231092;24244240;24252463;24252932;24279366;24279843;24281418;24282563;24284756;24287007;24300156;24301465	24223867;24223867;24231199;24244386;24252630;24253015;24279545;24279945;24281584;24282754;24284815;24287149;24300324;24302790	+;+;+;+;+;+;+;+;+;+;+;+;+;+	3198	0.0807481	0.0560579	0.0529736	0.0482496	0.0157469	0.0701532	0.0451937	0.0423689	0.0498433	0.120541	0.0473309	0.0857761
Ctgf	10;10;10;10;10;10;10;10;10;10;10	24595442;24595726;24595780;24595876;24595876;24596347;24596347;24596347;24596732;24596732;24597315	24595788;24595788;24596098;24596098;24596098;24596598;24596370;24596598;24598683;24596943;24598678	+;+;+;+;+;+;+;+;+;+;+	2861	45.1749	19.5189	21.5981	66.6431	30.6094	21.3921	45.2465	44.6443	15.8972	34.6281	24.9011	35.5554
Enpp1	10;10;10;10;10;10;10;10;10;10;10;10;10;10;10;10;10;10;10;10;10;10;10;10;10;10;10;10;10;10;10;10;10;10;10;10;10;10;10;10;10;10;10;10;10;10;10;10;10;10;10;10;10;10;10;10;10;10;10;10;10;10;10;10;10;10;10;10;10;10;10;10;10;10;10;10;10;10;10;10;10;10;10;10;10;10;10;10;10;10;10;10;10;10;10;10;10;10;10;10	24637914;24641435;24641806;24645278;24645278;24645278;24647153;24647153;24647153;24647771;24648017;24648017;24648017;24649244;24649244;24649244;24649244;24651245;24651245;24651245;24651245;24652835;24652835;24652835;24652835;24653903;24653903;24653903;24653903;24654888;24654888;24654888;24654888;24655803;24655803;24655803;24655803;24657105;24657105;24657105;24657105;24657839;24657839;24657839;246…	24641976;24641976;24641976;24645440;24645440;24645440;24647285;24647285;24647285;24648097;24648097;24648097;24648097;24649373;24649373;24649373;24649373;24651396;24651399;24651396;24651396;24652886;24652886;24652886;24652886;24654069;24654069;24654069;24654069;24654975;24654975;24654975;24654975;24655872;24655872;24655872;24655872;24657232;24657232;24657232;24657232;24657870;24657870;24657870;246…	-;-;-;-;-;-;-;-;-;-;-;-;-;-;-;-;-;-;-;-;-;-;-;-;-;-;-;-;-;-;-;-;-;-;-;-;-;-;-;-;-;-;-;-;-;-;-;-;-;-;-;-;-;-;-;-;-;-;-;-;-;-;-;-;-;-;-;-;-;-;-;-;-;-;-;-;-;-;-;-;-;-;-;-;-;-;-;-;-;-;-;-;-;-;-;-;-;-;-;-	10257	1.15811	1.23658	1.13551	1.40908	0.854282	1.19863	1.39499	1.13607	1.18626	1.19849	1.09695	1.0653
Enpp3	10;10;10;10;10;10;10;10;10;10;10;10;10;10;10;10;10;10;10;10;10;10;10;10;10	24773814;24774783;24776761;24777894;24778693;24784790;24786459;24787719;24791989;24793585;24795686;24797759;24798152;24799158;24804399;24805869;24807446;24808078;24809854;24817867;24820572;24824803;24826176;24831731;24836016	24774072;24774939;24776893;24777971;24778825;24784944;24786513;24787897;24792076;24793651;24795813;24797790;24798280;24799266;24804471;24805934;24807555;24808197;24809933;24817964;24820632;24824928;24826298;24831806;24836195	-;-;-;-;-;-;-;-;-;-;-;-;-;-;-;-;-;-;-;-;-;-;-;-;-	2815	0.351649	0.477637	0.767308	0.712585	0.214672	0.366611	0.20537	0.32089	0.887123	0.639061	0.448088	0.259857
Med23	10;10;10;10;10;10;10;10;10;10;10;10;10;10;10;10;10;10;10;10;10;10;10;10;10;10;10;10;10;10;10;10;10;10;10;10;10;10;10;10;10;10;10;10;10;10;10;10;10;10;10;10;10;10;10;10;10;10;10;10;10;10;10;10;10;10;10;10;10;10;10;10;10;10;10;10;10;10;10;10;10;10;10;10;10;10;10;10;10;10;10;10;10;10;10;10;10;10;10;10;10;10;10;10;10;10;10;10;10;10;10;10;10;10;10;10;10;10;10;10;10;10;10;10;10;10;10;10;10;10;10;10;10;…	24869986;24870037;24870037;24870047;24870098;24870310;24870454;24870454;24870454;24870454;24870454;24870644;24870664;24870664;24870664;24870664;24870664;24870664;24870839;24873473;24873473;24873473;24873473;24873473;24873473;24873473;24874570;24874570;24874570;24874570;24874570;24874570;24874570;24875596;24875596;24875596;24875596;24875596;24875596;24875596;24876940;24876940;24876940;24876940;248…	24870146;24870146;24870146;24870146;24870146;24870485;24870485;24870485;24870485;24870485;24870485;24870751;24870751;24870751;24870751;24870751;24870751;24870751;24870919;24873597;24873597;24873597;24873597;24873597;24873597;24873597;24874681;24874681;24874681;24874681;24874681;24874681;24874681;24875669;24875694;24875694;24875694;24875694;24875694;24875694;24877041;24877041;24877041;24877041;248…	+;+;+;+;+;+;+;+;+;+;+;+;+;+;+;+;+;+;+;+;+;+;+;+;+;+;+;+;+;+;+;+;+;+;+;+;+;+;+;+;+;+;+;+;+;+;+;+;+;+;+;+;+;+;+;+;+;+;+;+;+;+;+;+;+;+;+;+;+;+;+;+;+;+;+;+;+;+;+;+;+;+;+;+;+;+;+;+;+;+;+;+;+;+;+;+;+;+;+;+;+;+;+;+;+;+;+;+;+;+;+;+;+;+;+;+;+;+;+;+;+;+;+;+;+;+;+;+;+;+;+;+;+;+;+;+;+;+;+;+;+;+;+;+;+;+;+;+;+;+	6692	3.37647	2.74589	3.06947	3.05899	2.89719	2.58814	2.85085	3.00337	2.18344	2.79063	3.02336	3.20413
Arg1	10;10;10;10;10;10;10;10	24915208;24916028;24916355;24916775;24917913;24920623;24922621;24927312	24915779;24916164;24916459;24916869;24918072;24920797;24922693;24927470	-;-;-;-;-;-;-;-	1476	8.68939	3.97778	3.95977	11.8131	2.49063	3.19197	3.78623	3.33537	6.01166	3.3372	2.80304	8.82779
Akap7	10;10;10;10;10;10;10;10;10;10;10;10;10;10;10;10;10;10;10;10;10;10;10;10;10;10;10;10;10	25169090;25169090;25170122;25199997;25220611;25220611;25238634;25239626;25267308;25267370;25271505;25271505;25279329;25283893;25283893;25283893;25283923;25284024;25289599;25289599;25289599;25289599;25289599;25295898;25296928;25298135;25299040;25299040;25307785	25171248;25171248;25171248;25200158;25220758;25220758;25238717;25239738;25267468;25267468;25271641;25271641;25279804;25284041;25284041;25284041;25284041;25284041;25289730;25289730;25289730;25289730;25289730;25296100;25297073;25298228;25299107;25299164;25307870	-;-;-;-;-;-;-;-;-;-;-;-;-;-;-;-;-;-;-;-;-;-;-;-;-;-;-;-;-	4375	12.6214	11.2891	11.1036	12.3912	12.0515	12.3277	12.3001	12.8321	11.5739	10.9553	12.778	11.9966
Epb41l2	10;10;10;10;10;10;10;10;10;10;10;10;10;10;10;10;10;10;10;10;10;10;10;10;10;10;10;10;10;10;10;10;10;10;10;10;10;10;10;10	25359798;25408368;25441573;25441573;25443742;25443742;25460792;25460792;25468096;25468096;25469196;25469196;25471419;25471419;25473076;25473076;25479009;25479009;25479668;25479668;25484208;25484208;25488951;25488951;25493567;25493567;25495445;25495445;25501824;25501824;25504137;25504137;25506175;25506175;25507777;25507777;25512973;25512973;25522297;25522297	25359981;25408442;25442057;25442057;25443954;25443954;25460896;25460896;25468138;25468138;25469271;25469271;25471637;25471637;25473163;25473163;25479161;25479161;25479765;25479765;25484380;25484380;25489093;25489093;25493629;25493629;25495591;25495591;25502387;25502387;25504259;25504259;25506273;25506273;25507857;25507857;25513081;25513081;25523519;25523519	+;+;+;+;+;+;+;+;+;+;+;+;+;+;+;+;+;+;+;+;+;+;+;+;+;+;+;+;+;+;+;+;+;+;+;+;+;+;+;+	4464	112.07	158.079	133.869	157.217	187.423	145.305	127.899	116.616	125.739	155.257	117.298	137.31
Smlr1	10;10;10	25527943;25532252;25535961	25528304;25536142;25536267	-;-;-	4378	0.0196614	0.0102372	0.00967391	0	0	0	0	0.0103164	0	0.0195671	0.0115246	0.0208856
Tmem200a	10;10	25991186;26078138	25994385;26079052	-;-	4115	0.135967	0.435658	0.504317	0.324978	0.171329	0.556104	0.351226	0.450006	0.529393	0.26022	0.588536	0.46663
Gm9767	10	26078255	26079447	+	1193	0.0721521	0.112703	0.0710015	0.0862264	0.0422116	0.263277	0.0807652	0.113576	0.0445373	0.107709	0.0422923	0.15329
Samd3	10;10;10;10;10;10;10;10;10;10;10;10;10;10;10;10;10;10;10	26229707;26229707;26230104;26230104;26230828;26230828;26233526;26233526;26244481;26244481;26245544;26245544;26251749;26251749;26259125;26263782;26270090;26271406;26271695	26229814;26229814;26230204;26230204;26231017;26231017;26233627;26233627;26244666;26244666;26245628;26245628;26251916;26251916;26260804;26263982;26270261;26271488;26272172	+;+;+;+;+;+;+;+;+;+;+;+;+;+;+;+;+;+;+	3554	0.0726597	0.0882747	0.0834177	0.0434165	0	0.0126252	0.0948889	0.0508331	0.0897012	0.108467	0.0851796	0.12864
L3mbtl3	10;10;10;10;10;10;10;10;10;10;10;10;10;10;10;10;10;10;10;10;10;10;10;10;10;10;10;10;10;10;10;10;10;10;10;10;10;10;10;10;10;10;10;10;10;10;10;10;10;10;10;10;10;10;10;10;10;10;10;10;10;10;10;10;10	26274468;26274471;26275452;26279617;26279617;26279617;26279938;26279938;26279938;26282780;26282780;26282780;26292641;26292641;26292641;26302653;26302653;26302653;26303623;26303623;26303623;26313847;26313847;26313847;26315492;26315492;26315492;26318377;26318377;26318377;26327687;26327687;26327687;26330175;26330175;26330175;26331820;26331820;26331820;26336233;26336233;26336233;26337768;26337768;263…	26276263;26276263;26276263;26279679;26279679;26279679;26280413;26280413;26280413;26282859;26282859;26282859;26292793;26292793;26292793;26302755;26302755;26302755;26303737;26303737;26303737;26313957;26313957;26313957;26315577;26315577;26315577;26318453;26318453;26318453;26327838;26327838;26327838;26330266;26330266;26330266;26331955;26331955;26331955;26336337;26336337;26336337;26337859;26337859;263…	-;-;-;-;-;-;-;-;-;-;-;-;-;-;-;-;-;-;-;-;-;-;-;-;-;-;-;-;-;-;-;-;-;-;-;-;-;-;-;-;-;-;-;-;-;-;-;-;-;-;-;-;-;-;-;-;-;-;-;-;-;-;-;-;-	4651	5.85756	7.3332	6.51085	7.23239	7.15695	7.41884	6.12176	6.90442	4.71811	7.17402	5.76036	6.54669
Arhgap18	10;10;10;10;10;10;10;10;10;10;10;10;10;10;10;10;10;10;10;10;10;10;10;10;10;10;10;10;10;10;10;10;10;10	26753421;26772477;26822602;26845932;26845932;26845932;26849875;26849875;26849875;26854874;26854874;26860557;26860557;26863342;26869921;26869921;26872673;26872673;26877157;26877157;26878891;26878891;26880688;26880688;26887781;26887781;26889732;26889732;26912607;26912607;26916393;26916393;26917005;26917005	26753502;26772696;26822651;26846128;26846128;26846128;26850001;26850110;26850110;26854937;26854937;26860732;26860732;26863442;26870086;26870086;26872764;26872764;26877234;26877234;26879050;26879050;26880770;26880770;26887987;26887987;26889872;26889872;26912731;26912731;26916454;26916454;26918458;26918648	+;+;+;+;+;+;+;+;+;+;+;+;+;+;+;+;+;+;+;+;+;+;+;+;+;+;+;+;+;+;+;+;+;+	3884	16.3113	14.5971	14.7535	14.4344	21.3933	15.5497	13.1108	12.303	11.5869	17.9754	14.835	14.7373
Lama2	10;10;10;10;10;10;10;10;10;10;10;10;10;10;10;10;10;10;10;10;10;10;10;10;10;10;10;10;10;10;10;10;10;10;10;10;10;10;10;10;10;10;10;10;10;10;10;10;10;10;10;10;10;10;10;10;10;10;10;10;10;10;10;10;10;10;10;10;10;10;10;10;10;10;10;10;10;10;10;10;10;10;10;10;10;10;10;10;10;10;10;10;10;10;10;10;10;10;10;10;10;10;10;10;10;10;10;10;10;10;10;10;10;10;10;10;10;10;10;10;10;10;10;10	26980036;26981285;26984291;26986790;26986790;26989316;26990806;26992913;26993403;27000717;27001126;27006680;27015379;27018407;27021461;27023272;27030170;27031021;27035957;27041073;27043539;27044435;27050198;27053028;27054503;27056529;27070266;27101329;27104104;27105107;27118479;27119908;27124466;27133967;27138863;27155356;27158778;27164902;27176663;27184384;27187548;27187746;27187968;27187968;271…	26984513;26981652;26984513;26988514;26986920;26989469;26990961;26993102;26993515;27000885;27001302;27006828;27015555;27018527;27021472;27023410;27030314;27031183;27036081;27041232;27043672;27044578;27050352;27053033;27054685;27056645;27070368;27101467;27104267;27105223;27118689;27120070;27124577;27134065;27139005;27155549;27158864;27165026;27176797;27184501;27187879;27187879;27188156;27188156;271…	-;-;-;-;-;-;-;-;-;-;-;-;-;-;-;-;-;-;-;-;-;-;-;-;-;-;-;-;-;-;-;-;-;-;-;-;-;-;-;-;-;-;-;-;-;-;-;-;-;-;-;-;-;-;-;-;-;-;-;-;-;-;-;-;-;-;-;-;-;-;-;-;-;-;-;-;-;-;-;-;-;-;-;-;-;-;-;-;-;-;-;-;-;-;-;-;-;-;-;-;-;-;-;-;-;-;-;-;-;-;-;-;-;-;-;-;-;-;-;-;-;-;-;-	16338	3.17693	3.26989	3.50215	3.9383	2.5768	3.79272	3.08143	3.03258	2.2407	3.18267	2.39952	3.83367
Ptprk	10;10;10;10;10;10;10;10;10;10;10;10;10;10;10;10;10;10;10;10;10;10;10;10;10;10;10;10;10;10;10;10	28074820;28206134;28263501;28334476;28336422;28354605;28383431;28465758;28472948;28475085;28483188;28492914;28496909;28551618;28560005;28562107;28566495;28568327;28569897;28570174;28573368;28574819;28575590;28580393;28585560;28585923;28586908;28588928;28589259;28591885;28592770;28595802	28075177;28206256;28263772;28334557;28336537;28354779;28383724;28466060;28473057;28475286;28483293;28493187;28496945;28551756;28560165;28562142;28566679;28568414;28569973;28570191;28573404;28574916;28575706;28580547;28585695;28586072;28587081;28589059;28589384;28592048;28592905;28597397	+;+;+;+;+;+;+;+;+;+;+;+;+;+;+;+;+;+;+;+;+;+;+;+;+;+;+;+;+;+;+;+	6177	7.35777	6.23988	6.91131	8.90957	5.86986	8.3028	7.34697	6.61721	6.44271	6.21994	7.22882	7.70489
Themis	10;10;10;10;10;10;10;10;10;10;10;10;10;10;10;10;10;10;10;10;10;10;10;10;10;10;10;10;10;10;10;10	28668360;28668360;28668395;28668397;28668627;28668633;28668633;28722475;28722475;28722475;28722475;28722475;28722475;28722475;28733492;28733492;28738497;28761155;28761155;28761155;28761155;28761155;28781691;28781691;28781691;28781691;28781691;28789707;28797483;28863300;28880951;28880951	28668750;28668750;28668750;28668750;28668750;28668750;28668750;28722636;28722636;28722636;28722636;28722636;28722636;28722636;28733653;28733653;28739306;28764039;28761613;28761613;28761613;28761613;28782046;28782742;28782742;28782742;28782742;28789920;28797816;28863452;28883818;28883815	+;+;+;+;+;+;+;+;+;+;+;+;+;+;+;+;+;+;+;+;+;+;+;+;+;+;+;+;+;+;+;+	9031	0.0238283	0.0198509	0.0234483	0.0170858	0.0278809	0.0347791	0.0160037	0.0600136	0.0058834	0.0284568	0.0279342	0.0455617
Soga3	10;10;10;10;10;10;10;10;10;10;10;10;10;10;10;10;10;10;10;10;10;10	29143839;29144059;29146564;29146564;29147335;29147721;29147797;29148185;29148185;29148185;29150244;29150244;29150244;29150244;29180962;29180962;29180962;29180962;29196226;29196265;29196265;29198945	29144435;29144336;29146891;29147753;29147753;29147753;29147827;29148409;29148409;29148409;29150402;29150402;29150402;29150402;29181033;29181033;29180980;29181033;29196335;29196463;29197440;29199630	+;+;+;+;+;+;+;+;+;+;+;+;+;+;+;+;+;+;+;+;+;+	4175	0.030926	0	0.0101443	0	0.0120619	0.0107473	0	0	0	0.0102592	0	0
9330159F19Rik	10;10;10;10;10;10;10;10;10;10;10;10;10;10;10;10;10;10;10	29211606;29211695;29211705;29218041;29218055;29218055;29221786;29221786;29221786;29222221;29222221;29222221;29223334;29224235;29224235;29224235;29227207;29227207;29227207	29211866;29211866;29211866;29218296;29218296;29218296;29222130;29222130;29222130;29222300;29222300;29222300;29223405;29225414;29225414;29225414;29228175;29228424;29230779	+;+;+;+;+;+;+;+;+;+;+;+;+;+;+;+;+;+;+	5767	0.0970182	0.0621721	0.088127	0.151618	0.0261965	0.124488	0.00835382	0.023495	0.119773	0.0519899	0.0349955	0.0317105
Echdc1	10;10;10;10;10;10;10;10;10;10;10;10;10;10;10;10;10;10;10;10;10;10;10;10	29313166;29313281;29313500;29313663;29317507;29317507;29317507;29317507;29322275;29322275;29322275;29322275;29331819;29331819;29331819;29331819;29334191;29334191;29334191;29334191;29334466;29344341;29344341;29344341	29313297;29313364;29313733;29313733;29317722;29317722;29317722;29317722;29322417;29322417;29322417;29322417;29331871;29331871;29331871;29331871;29334271;29334271;29334271;29334271;29334535;29347469;29344344;29345560	+;+;+;+;+;+;+;+;+;+;+;+;+;+;+;+;+;+;+;+;+;+;+;+	4125	18.1024	19.2637	16.6843	17.0699	20.4486	18.1329	18.9436	19.5004	16.2812	19.7807	20.1697	17.955
Rnf146	10;10;10;10;10;10;10;10;10;10;10;10;10;10;10;10;10;10;10;10;10	29344176;29344178;29346176;29346658;29347219;29347384;29354292;29354292;29354292;29354292;29354292;29354292;29357662;29361285;29361285;29361285;29361964;29361964;29361964;29361984;29361984	29347883;29347883;29347883;29347883;29347883;29347883;29354447;29354447;29354447;29354447;29354447;29354447;29357713;29361345;29361345;29361345;29362026;29362047;29362442;29362047;29362442	-;-;-;-;-;-;-;-;-;-;-;-;-;-;-;-;-;-;-;-;-	4456	20.5245	21.7252	19.76	19.484	20.0824	20.7433	22.7476	22.7042	18.3509	21.8968	22.1249	21.0331
Rspo3	10;10;10;10;10;10;10;10;10	29452416;29452418;29454154;29499932;29499932;29504581;29504581;29506388;29535232	29452768;29454329;29454329;29500129;29500129;29504730;29504727;29506579;29535867	-;-;-;-;-;-;-;-;-	3090	0.891417	0.986293	1.3158	2.03073	0.814862	1.61183	0.888692	0.876994	1.39281	2.61984	1.99206	1.09488
Cenpw	10;10;10;10;10	30194569;30196009;30198466;30200361;30200361	30198579;30197226;30198579;30200492;30200560	-;-;-;-;-	4211	0.500807	0.564087	0.784489	0.403069	0.466393	0.671292	0.903809	1.0082	0.529942	0.681492	0.73088	0.846843
Trmt11	10;10;10;10;10;10;10;10;10;10;10;10;10;10;10;10;10;10;10;10;10;10;10;10;10;10;10;10;10;10;10;10;10;10;10;10;10;10;10;10;10;10;10;10	30534225;30534715;30547657;30547657;30558919;30558919;30559121;30559164;30559164;30560818;30560818;30560818;30565199;30566426;30566426;30566426;30567761;30587439;30587439;30587439;30589955;30590025;30590025;30590025;30590025;30590843;30590843;30590843;30590843;30591021;30594115;30594115;30594115;30594115;30596327;30597740;30597740;30597740;30597740;30600590;30600590;30600590;30600590;30600590	30535244;30535244;30547777;30547777;30559050;30559050;30559236;30559236;30559236;30560982;30560982;30560982;30566506;30566506;30566506;30566506;30567871;30587595;30587595;30587595;30590159;30590159;30590109;30590159;30590159;30590935;30591102;30590935;30590935;30591102;30594188;30594188;30594188;30594188;30597805;30597805;30597805;30597805;30597805;30600650;30600695;30600677;30600695;30600749	-;-;-;-;-;-;-;-;-;-;-;-;-;-;-;-;-;-;-;-;-;-;-;-;-;-;-;-;-;-;-;-;-;-;-;-;-;-;-;-;-;-;-;-	5308	1.02164	1.13143	1.16493	1.04651	0.958215	1.21727	1.28882	1.49757	1.32132	1.05709	1.2262	1.13694
Hint3	10;10;10;10;10;10;10;10;10;10;10;10;10;10;10;10;10;10;10;10;10;10;10;10	30608141;30608231;30608349;30608383;30610317;30610317;30610317;30610317;30611648;30611648;30611648;30611648;30612108;30613278;30614713;30614713;30614713;30614713;30616201;30618203;30618203;30618203;30629324;30629532	30608423;30608423;30608423;30608423;30610461;30610443;30610443;30610443;30611717;30611717;30611717;30611717;30614552;30613372;30614830;30614830;30614830;30614830;30618365;30618337;30618479;30618333;30629401;30629632	-;-;-;-;-;-;-;-;-;-;-;-;-;-;-;-;-;-;-;-;-;-;-;-	5519	0.701846	0.88516	1.12039	0.68032	1.10407	1.11382	0.794357	0.916562	1.17453	0.830414	1.1976	0.952645
Ncoa7	10;10;10;10;10;10;10;10;10;10;10;10;10;10;10;10;10;10;10;10;10;10;10;10;10;10;10;10;10;10;10;10;10;10;10;10;10;10;10;10;10;10;10;10;10;10;10;10;10;10;10;10;10;10;10;10;10;10;10;10;10;10;10;10;10;10;10;10;10;10;10;10;10;10;10;10;10;10;10;10;10;10;10;10;10;10;10;10;10;10;10;10;10;10;10;10;10;10;10;10;10;10;10;10;10	30628999;30631813;30636448;30643468;30645582;30645584;30645590;30646312;30646367;30646834;30647388;30647390;30647967;30647967;30647967;30647967;30647967;30647967;30648445;30648445;30648445;30648445;30648445;30648445;30648445;30648445;30648445;30652936;30652936;30652936;30652936;30652936;30652936;30652936;30652936;30652936;30652936;30654311;30654311;30654311;30654311;30654311;30654311;30654311;306…	30629401;30632000;30636559;30647651;30647651;30647651;30647651;30647651;30648040;30648540;30647651;30647651;30648040;30648040;30648040;30648040;30648040;30648040;30648540;30648540;30648540;30648540;30648540;30648540;30648540;30648540;30648540;30653088;30653088;30653088;30653088;30653088;30653088;30653088;30653088;30653088;30653088;30655767;30654442;30654442;30654442;30654442;30654442;30654442;306…	-;-;-;-;-;-;-;-;-;-;-;-;-;-;-;-;-;-;-;-;-;-;-;-;-;-;-;-;-;-;-;-;-;-;-;-;-;-;-;-;-;-;-;-;-;-;-;-;-;-;-;-;-;-;-;-;-;-;-;-;-;-;-;-;-;-;-;-;-;-;-;-;-;-;-;-;-;-;-;-;-;-;-;-;-;-;-;-;-;-;-;-;-;-;-;-;-;-;-;-;-;-;-;-;-	10565	4.05334	6.04082	6.6505	5.73978	6.57306	8.17555	3.88968	3.93726	5.88411	5.12852	6.51876	3.93791
Hey2	10;10;10;10;10;10	30832359;30837475;30839810;30840391;30840604;30842566	30834427;30837556;30842015;30840474;30840682;30842801	-;-;-;-;-;-	4593	13.6903	13.9148	11.6185	8.89149	9.50594	8.84114	15.1043	18.1035	10.0991	11.545	12.8416	15.6974
Hddc2	10;10;10;10;10;10;10;10;10;10;10;10;10;10;10;10;10;10;10;10;10	31313383;31313405;31313407;31313472;31314515;31314515;31314515;31316293;31316293;31316293;31316293;31320167;31320268;31320268;31325206;31326022;31326022;31326022;31327881;31327881;31327881	31313483;31313483;31314636;31313483;31314636;31314636;31314636;31317843;31317032;31316395;31316395;31320336;31320336;31320336;31325275;31326160;31326160;31326160;31328202;31328184;31328204	+;+;+;+;+;+;+;+;+;+;+;+;+;+;+;+;+;+;+;+;+	3508	8.53904	9.22429	9.63432	7.55089	10.1636	9.03028	11.7008	12.759	10.5872	9.15741	11.3336	10.5825
Tpd52l1	10;10;10;10;10;10;10;10;10;10;10;10;10;10;10;10;10;10;10;10;10;10;10;10;10;10;10;10;10;10;10;10	31332376;31332377;31332627;31332627;31332657;31338185;31338185;31338185;31341140;31341140;31341140;31343012;31346611;31346611;31346611;31346611;31346611;31357872;31357872;31357872;31357872;31357872;31379215;31379215;31379215;31379215;31379215;31445712;31445712;31445712;31445712;31445712	31332969;31332969;31332969;31332969;31332969;31338245;31338245;31338245;31341178;31341178;31341178;31343026;31346712;31346712;31346712;31346712;31346712;31358020;31358020;31358020;31358020;31358020;31379330;31379330;31379330;31379330;31379330;31445797;31445855;31445819;31445854;31445958	-;-;-;-;-;-;-;-;-;-;-;-;-;-;-;-;-;-;-;-;-;-;-;-;-;-;-;-;-;-;-;-	1323	57.3199	57.1154	56.854	42.7645	55.6494	51.1782	71.6638	68.6525	52.7715	56.0737	42.8274	56.8805
Rnf217	10;10;10;10;10;10	31493193;31503751;31505773;31517384;31534663;31608384	31502731;31503822;31505974;31517548;31534896;31609184	-;-;-;-;-;-	11013	1.55147	1.56272	1.49981	1.75603	1.46324	1.49118	1.8023	2.18588	1.36053	1.78516	1.33776	1.61487
Nkain2	10;10;10;10;10;10;10;10;10;10;10;10	31689310;31694332;31746502;31951119;32329765;32329765;32402236;32402236;32410040;32410326;32889643;32889905	31691687;31694413;31746562;31951319;32329845;32329845;32402373;32402373;32410083;32410335;32890461;32890462	-;-;-;-;-;-;-;-;-;-;-;-	3815	0.124096	0.105731	0.210929	0.202231	0.0792008	0.188183	0.214679	0.213099	0.0835643	0.0898187	0.119028	0.215711
Trdn	10;10;10;10;10;10;10;10;10;10;10;10;10;10;10;10;10;10;10;10;10;10;10;10;10;10;10;10;10;10;10;10;10;10;10;10;10;10	33083483;33139074;33157013;33158246;33175769;33183954;33186641;33195949;33200163;33233855;33257075;33258087;33305037;33321305;33332436;33333232;33334982;33335140;33337513;33343076;33363978;33398381;33399095;33433701;33437718;33438792;33439175;33442888;33444054;33444724;33445420;33446988;33450979;33464558;33466423;33468156;33471566;33474379	33083745;33139283;33157174;33158278;33175828;33184016;33186700;33196125;33200222;33233926;33257137;33258140;33305090;33321334;33332465;33333249;33335014;33335166;33337539;33343123;33364022;33398431;33399145;33433730;33437747;33438818;33439222;33442932;33444074;33444750;33445458;33447032;33451002;33464596;33466461;33468194;33471604;33476709	+;+;+;+;+;+;+;+;+;+;+;+;+;+;+;+;+;+;+;+;+;+;+;+;+;+;+;+;+;+;+;+;+;+;+;+;+;+	4514	0.038138	0.0595724	0.0187649	0.0455774	0.0111561	0.0596411	0.0106727	0.0300168	0.0353121	0.939388	0.0558869	0.0303846
Clvs2	10;10;10;10;10;10;10;10;10;10;10;10;10;10;10;10	33512286;33528323;33543382;33543419;33589912;33594311;33595744;33595744;33595744;33622544;33622544;33622544;33624136;33624136;33624136;33624136	33513346;33528543;33543492;33543492;33593020;33595918;33595918;33595918;33595918;33623058;33623058;33623058;33624619;33624769;33624622;33624196	-;-;-;-;-;-;-;-;-;-;-;-;-;-;-;-	7259	0.124509	0.0617417	0.0933514	0.106283	0.0624365	0.129807	0.192467	0.143105	0.0585568	0.0826081	0.11121	0.113368
Sult3a2	10;10;10;10;10;10	33766424;33768171;33777170;33778177;33779631;33781974	33766545;33768357;33777264;33778303;33779839;33782115	-;-;-;-;-;-	882	0	0.152443	0	0	0	0.050873	0	0	0	0.0971254	0.171615	0.10367
Sult3a1	10;10;10;10;10;10	33863935;33866521;33869150;33870164;33877283;33879201	33864088;33866729;33869276;33870258;33877469;33879475	+;+;+;+;+;+	1047	0.205534	0.0428064	0.121353	0.0491252	0.0961958	0.128567	0.138041	0	0.152244	0.122729	0.0963796	0.48033
Rsph4a	10;10;10;10;10;10;10;10;10;10;10;10	33905111;33905485;33908067;33908067;33909013;33909013;33911506;33911506;33912962;33912962;33914336;33914336	33905838;33905838;33908301;33908301;33909750;33909750;33911650;33911650;33913079;33913079;33915883;33916021	+;+;+;+;+;+;+;+;+;+;+;+	3650	0.0825401	0	0.0348102	0.028183	0.0413905	0.110638	0.0263981	0.0742442	0.029114	0.0469395	0.069116	0.112731
Zufsp	10;10;10;10;10;10;10;10;10;10	33926936;33928012;33929821;33930156;33935089;33940158;33943650;33948929;33949748;33951131	33927621;33928163;33929986;33930344;33935257;33940279;33943760;33949498;33949864;33951212	-;-;-;-;-;-;-;-;-;-	2364	5.88051	5.83927	5.19551	5.287	4.55868	5.54232	6.25642	6.66779	4.60756	4.96449	5.52782	5.66648
Gm17567	10	33994989	33995054	-	66	0.652102	2.0372	0	0.779304	0.763007	0.679848	0	0	0.805045	0	0	0.692707
Rwdd1	10;10;10;10;10;10;10;10;10	33996555;33996561;34001137;34001137;34001658;34002424;34008993;34012072;34019366	33996848;33996848;34001245;34001199;34001790;34002567;34009123;34012137;34019624	-;-;-;-;-;-;-;-;-	1136	88.0855	100.249	89.2904	80.8637	90.1665	82.1168	94.6141	96.7712	89.7087	96.448	95.3132	84.3139
Trappc3l	10;10;10;10;10;10;10	34037597;34056713;34060012;34065145;34098764;34102628;34109450	34037688;34056896;34060109;34065244;34098949;34102786;34109813	+;+;+;+;+;+;+	1183	2.76496	2.04581	2.50606	2.21736	1.4899	2.92053	2.56561	2.74885	1.6169	1.99136	2.04719	3.47817
Fam26d	10;10	34038784;34043709	34041892;34044313	-;-	3714	0	0.0120674	0	0.0276974	0	0.0241626	0.0129716	0.0121608	0	0	0	0
Fam26e	10;10	34091352;34095898	34092515;34096519	-;-	1786	0.457859	0.803016	0.474271	0.892752	0.169177	0.527587	0.78226	0.83452	0.892491	0.791414	0.819253	0.563164
Fam26f	10;10	34126067;34127391	34126566;34127984	-;-	1094	0.275385	0.163869	0.154853	0.0940293	0.092063	0.0820292	0.484407	0.165138	0.485676	0.352368	0.461195	0.835808
Dse	10;10;10;10;10;10;10;10;10;10;10;10;10;10;10;10;10;10	34151393;34153624;34153842;34155131;34155909;34155909;34159969;34159969;34162736;34162736;34162863;34176050;34183692;34183692;34184135;34206817;34207080;34207591	34153974;34153974;34153974;34155264;34156116;34156116;34160208;34160208;34162989;34162989;34162989;34176245;34184160;34184160;34184160;34207077;34207715;34207635	-;-;-;-;-;-;-;-;-;-;-;-;-;-;-;-;-;-	4980	3.22358	3.41087	3.17218	3.69747	2.2449	3.89234	3.24079	3.18333	2.99807	3.07911	2.93813	3.80989
Tspyl1	10	34282190	34285275	+	3086	17.712	17.7472	16.9766	20.1336	17.6565	19.7451	19.3892	15.6015	16.3566	20.4029	16.5621	21.0075
Nt5dc1	10;10;10;10;10;10;10;10;10;10;10;10;10;10;10;10;10;10;10;10;10;10;10;10;10;10;10;10;10;10;10;10;10;10;10;10;10;10;10;10;10;10;10;10;10;10;10;10;10;10;10	34288288;34303609;34303609;34304265;34310301;34310301;34310301;34310301;34313589;34313589;34313589;34313589;34314750;34314750;34314750;34322609;34322609;34322609;34324288;34324288;34324288;34377728;34397068;34398114;34398114;34398114;34399738;34399738;34399738;34399738;34399738;34403651;34403651;34403651;34403651;34403651;34407535;34407535;34407535;34407535;34407535;34411368;34411368;34411368;344…	34288562;34304979;34304979;34304979;34310469;34310469;34310469;34310469;34313741;34313741;34313683;34313741;34314868;34314868;34314868;34322706;34322706;34322706;34324462;34324462;34324462;34378040;34397241;34398198;34398198;34398195;34399817;34399817;34399817;34399817;34399817;34403787;34403787;34403787;34403787;34403787;34407606;34407606;34407606;34407606;34407606;34411459;34411459;34411459;344…	-;-;-;-;-;-;-;-;-;-;-;-;-;-;-;-;-;-;-;-;-;-;-;-;-;-;-;-;-;-;-;-;-;-;-;-;-;-;-;-;-;-;-;-;-;-;-;-;-;-;-	3505	1.42439	1.80296	1.83668	1.80496	2.06894	2.11228	1.88307	1.90712	1.71299	1.51532	1.91454	1.78701
Tspyl4	10;10;10	34297442;34299256;34300910	34301320;34299408;34301316	+;+;+	3879	1.30925	1.30561	1.07	1.61767	1.57086	1.41122	1.16746	1.09449	0.890344	1.6011	0.793436	1.32005
Col10a1	10;10;10	34389981;34390607;34394188	34390043;34390775;34397085	+;+;+	3130	0.068752	0.0572758	0.0541244	0.0985956	0.0321779	0.0143355	0.0769592	0.187587	0	0.0547377	0.145077	0.131459
Frk	10;10;10;10;10;10;10;10;10;10;10;10;10;10;10;10;10;10;10;10;10;10;10;10;10	34483399;34483461;34483520;34483532;34483745;34483745;34547293;34547293;34547293;34583898;34583898;34583898;34586166;34586166;34586166;34591812;34591812;34591812;34605695;34605695;34605695;34607806;34607806;34608360;34608360	34483588;34483632;34484369;34484369;34483922;34484369;34547414;34547414;34547414;34584061;34584061;34584061;34586334;34586334;34586334;34591970;34591970;34591970;34606280;34605876;34605876;34607971;34607971;34609953;34611278	+;+;+;+;+;+;+;+;+;+;+;+;+;+;+;+;+;+;+;+;+;+;+;+;+	5256	1.9243	2.20851	2.16758	2.44644	1.97372	2.28789	2.01652	1.80455	1.72864	2.67294	2.34227	1.6092
Amd2	10	35708675	35711892	-	3218	1.73867	1.40667	1.80307	1.47046	1.42406	1.51983	0.988081	1.44562	1.40345	1.65047	1.25431	1.7759
Hs3st5	10;10;10;10;10;10;10;10;10;10;10;10;10;10;10;10;10;10;10;10;10;10	36506814;36506819;36506889;36507026;36507407;36554014;36628245;36628245;36628245;36628245;36628245;36701930;36701930;36701930;36808861;36809831;36828671;36828671;36828671;36832578;36832578;36832578	36507615;36507615;36507615;36507615;36507615;36554072;36628410;36628410;36628410;36628410;36628410;36702949;36702034;36702034;36808986;36810038;36828809;36828809;36828809;36834397;36834389;36833773	+;+;+;+;+;+;+;+;+;+;+;+;+;+;+;+;+;+;+;+;+;+	4340	0.0793341	0.051634	0	0.0474046	0.06962	0.0310161	0.0666034	0.0728471	0.0612131	0.0394768	0.0697531	0.0210685
Hdac2	10;10;10;10;10;10;10;10;10;10;10;10;10;10;10;10;10;10;10;10;10;10;10;10;10;10;10;10;10;10;10;10	36974544;36974570;36985127;36985127;36986307;36986307;36988080;36988080;36989150;36989150;36991757;36991757;36991766;36993608;36993608;36993608;36993776;36993776;36993776;36996989;36996989;36997394;36997967;36998172;36998414;36998474;37000369;37000369;37000369;37001529;37001529;37001529	36974803;36974803;36985239;36985239;36986424;36986424;36988154;36988154;36989288;36989288;36991898;36991898;36991898;36993700;36993700;36993700;36993884;36996111;36993884;36997045;36997129;36997502;36998097;36998569;36998569;36998569;37000426;37000426;37000426;37001611;37001888;37001889	+;+;+;+;+;+;+;+;+;+;+;+;+;+;+;+;+;+;+;+;+;+;+;+;+;+;+;+;+;+;+;+	4474	81.4889	78.1866	77.4157	70.5982	75.9204	66.1817	79.0055	89.5531	78.3456	74.0231	85.1437	75.68
Marcks	10;10	37133375;37138434	37136935;37138920	-;-	4048	26.6334	25.93	25.5077	27.8389	22.1811	25.8712	25.0998	27.2576	24.2564	26.8019	27.9819	25.1746
Lama4	10;10;10;10;10;10;10;10;10;10;10;10;10;10;10;10;10;10;10;10;10;10;10;10;10;10;10;10;10;10;10;10;10;10;10;10;10;10;10;10;10;10;10;10;10;10;10;10;10;10;10;10;10;10;10;10;10;10;10;10;10;10;10;10;10;10;10;10;10;10;10;10;10;10	38965515;38965515;38965553;38965570;38965672;39005412;39005412;39005412;39005412;39005412;39010998;39010998;39010998;39010998;39017321;39017321;39017321;39017321;39026535;39026535;39026535;39026535;39028622;39028622;39028622;39028622;39030433;39030433;39030433;39030433;39033011;39033011;39033011;39033011;39042581;39042581;39042581;39045653;39045653;39045653;39047934;39047934;39053741;39053741;390…	38966149;38966149;38966149;38966149;38966149;39005513;39005513;39007396;39005513;39005513;39011122;39011122;39011122;39011122;39017401;39017401;39017401;39017401;39026749;39026749;39026749;39026749;39028696;39028696;39028696;39028696;39030584;39030584;39030584;39030584;39033121;39034249;39033121;39033121;39042692;39042692;39042692;39045820;39047246;39045820;39048127;39048127;39054519;39053857;390…	+;+;+;+;+;+;+;+;+;+;+;+;+;+;+;+;+;+;+;+;+;+;+;+;+;+;+;+;+;+;+;+;+;+;+;+;+;+;+;+;+;+;+;+;+;+;+;+;+;+;+;+;+;+;+;+;+;+;+;+;+;+;+;+;+;+;+;+;+;+;+;+;+;+	12068	5.94511	5.0545	5.65728	6.29926	6.50554	5.32431	4.539	4.04571	4.96636	6.31765	4.55715	5.3644
Fam229b	10;10;10;10;10;10;10;10;10;10;10;10;10;10;10;10;10;10;10;10;10;10;10;10;10;10;10;10;10;10;10;10;10;10;10;10;10;10;10;10;10;10;10;10;10;10	39118804;39118808;39118810;39118810;39118818;39118819;39118820;39118824;39118868;39119619;39120226;39120258;39120258;39120258;39120258;39120258;39120258;39120258;39120258;39121487;39122177;39122177;39122177;39122177;39122177;39122177;39122177;39122177;39122177;39122963;39132247;39132247;39132247;39132247;39132247;39132247;39132247;39132247;39133804;39133812;39133823;39133823;39133823;39133823;391…	39119034;39119034;39119034;39119034;39119034;39119034;39119034;39119034;39119034;39122335;39120396;39120396;39120396;39120396;39120396;39120396;39120396;39120396;39120396;39121586;39122335;39122314;39122332;39122332;39122335;39122335;39122335;39122335;39122335;39123102;39132378;39132378;39132378;39132378;39132378;39132378;39132378;39132378;39133848;39133900;39133857;39133900;39133900;39133906;391…	-;-;-;-;-;-;-;-;-;-;-;-;-;-;-;-;-;-;-;-;-;-;-;-;-;-;-;-;-;-;-;-;-;-;-;-;-;-;-;-;-;-;-;-;-;-	3331	2.28696	1.70877	2.16148	2.08454	1.81418	2.15527	2.06822	1.88471	2.37671	1.4016	2.19632	1.3588
Tube1	10;10;10;10;10;10;10;10;10;10;10;10;10;10;10;10;10;10;10;10;10;10;10;10;10;10;10;10;10;10;10;10;10;10;10;10;10;10;10;10;10;10;10;10;10;10;10	39133976;39134023;39134027;39134068;39134206;39134206;39134206;39134988;39134988;39134988;39134988;39136967;39137134;39137134;39137134;39137134;39140823;39140823;39140823;39140823;39140823;39142255;39142255;39142255;39142255;39143144;39144375;39144375;39144375;39144375;39144756;39144756;39145573;39145573;39145573;39147312;39147312;39147312;39147312;39147763;39147763;39147763;39147763;39149459;391…	39134279;39134107;39134107;39134107;39134279;39134279;39134279;39135040;39135040;39135040;39135040;39137191;39137191;39137191;39137191;39137191;39141986;39140938;39140938;39140938;39140938;39142376;39142376;39142376;39142376;39145713;39144572;39144416;39144562;39144562;39144931;39144931;39145713;39145713;39145713;39147452;39147452;39147452;39147452;39147937;39147937;39147937;39147937;39150097;391…	+;+;+;+;+;+;+;+;+;+;+;+;+;+;+;+;+;+;+;+;+;+;+;+;+;+;+;+;+;+;+;+;+;+;+;+;+;+;+;+;+;+;+;+;+;+;+	7838	0.510666	0.543218	0.567364	0.419977	0.372645	0.572467	0.540894	0.610808	0.569427	0.579258	0.547161	0.699954
Wisp3	10;10;10;10;10	39150970;39153148;39154937;39158259;39163593	39151451;39153341;39155179;39158556;39163794	-;-;-;-;-	1419	0.090991	0.0631689	0.119387	0.0362467	0.106466	0.0948625	0.101853	0.159145	0.149776	0.0905545	0.071113	0.0644379
Fyn	10;10;10;10;10;10;10;10;10;10;10;10;10;10;10;10;10;10;10;10;10;10;10;10;10;10;10;10;10;10;10;10;10;10;10;10;10;10;10;10;10;10;10;10;10;10;10;10;10;10;10;10;10;10;10;10;10;10;10;10;10;10;10;10;10;10;10;10;10;10;10;10;10;10;10;10;10;10;10;10;10;10;10;10;10;10;10;10;10	39368855;39369764;39369798;39369803;39395005;39395005;39395005;39395005;39420009;39454805;39454915;39455066;39455066;39455066;39455066;39455066;39455066;39511739;39511739;39511739;39511739;39511739;39511739;39511739;39511739;39515573;39515573;39515573;39515573;39515573;39515573;39515573;39522754;39522754;39522754;39522754;39522754;39522754;39525401;39525401;39525401;39525401;39525401;39525401;395…	39369065;39370190;39370190;39370190;39395044;39395044;39395044;39395044;39420258;39454849;39454980;39455135;39455135;39455135;39455135;39455135;39455135;39511996;39511996;39511996;39511859;39511996;39511996;39511996;39511996;39515669;39515669;39515669;39515669;39515669;39515669;39515668;39522852;39522852;39522852;39522852;39522852;39522852;39525504;39525504;39525504;39525504;39525504;39525504;395…	+;+;+;+;+;+;+;+;+;+;+;+;+;+;+;+;+;+;+;+;+;+;+;+;+;+;+;+;+;+;+;+;+;+;+;+;+;+;+;+;+;+;+;+;+;+;+;+;+;+;+;+;+;+;+;+;+;+;+;+;+;+;+;+;+;+;+;+;+;+;+;+;+;+;+;+;+;+;+;+;+;+;+;+;+;+;+;+;+	4363	40.9376	36.6107	38.984	40.5531	34.6842	42.2167	39.7624	37.2046	37.6181	38.6404	39.3299	37.5348
Traf3ip2	10;10;10;10;10;10;10;10;10;10;10;10;10;10;10;10;10;10;10	39612934;39625850;39634535;39639220;39641134;39641306;39645708;39645708;39646123;39646714;39646849;39646849;39650555;39650906;39650906;39650906;39654383;39654383;39654383	39613346;39626659;39634724;39639398;39641394;39641394;39645758;39645776;39646284;39646965;39646965;39646965;39650980;39650980;39650980;39650920;39654823;39654825;39655307	+;+;+;+;+;+;+;+;+;+;+;+;+;+;+;+;+;+;+	3687	5.95328	5.45794	6.26039	5.92879	5.0536	6.04838	6.82075	7.69291	6.93164	5.51813	6.45908	5.28239
Rev3l	10;10;10;10;10;10;10;10;10;10;10;10;10;10;10;10;10;10;10;10;10;10;10;10;10;10;10;10;10;10;10;10;10;10;10;10;10;10;10;10;10;10;10;10;10;10;10;10;10;10;10;10;10;10;10;10;10;10;10;10;10;10;10;10;10;10;10;10;10;10;10;10;10;10;10;10;10;10;10;10;10;10;10;10;10;10;10;10;10;10;10;10;10;10;10;10;10;10;10;10;10;10;10;10;10;10;10;10;10;10;10;10;10;10;10;10;10;10;10;10;10;10;10;10;10;10;10;10;10;10	39732118;39732127;39732364;39732464;39742691;39783143;39783143;39783143;39790769;39790769;39790769;39794864;39794864;39794864;39799881;39799881;39799881;39804952;39804952;39804952;39805600;39805600;39805600;39806662;39806662;39806662;39806835;39806835;39806835;39813971;39813971;39813971;39817142;39817142;39817142;39820448;39820448;39820448;39821106;39821106;39821106;39825131;39827710;39827710;398…	39732613;39732613;39732400;39732613;39742818;39783332;39783332;39783332;39790843;39790843;39790843;39795024;39795024;39795024;39799977;39799977;39799977;39805046;39805046;39805046;39805704;39805704;39805704;39806746;39806746;39806746;39806983;39806983;39806983;39814090;39814090;39814090;39817379;39817379;39817379;39820590;39820590;39820590;39825258;39825258;39825258;39825258;39828605;39828605;398…	+;+;+;+;+;+;+;+;+;+;+;+;+;+;+;+;+;+;+;+;+;+;+;+;+;+;+;+;+;+;+;+;+;+;+;+;+;+;+;+;+;+;+;+;+;+;+;+;+;+;+;+;+;+;+;+;+;+;+;+;+;+;+;+;+;+;+;+;+;+;+;+;+;+;+;+;+;+;+;+;+;+;+;+;+;+;+;+;+;+;+;+;+;+;+;+;+;+;+;+;+;+;+;+;+;+;+;+;+;+;+;+;+;+;+;+;+;+;+;+;+;+;+;+;+;+;+;+;+;+	13293	3.44168	3.56038	3.93479	3.90408	3.3792	4.43873	3.72205	3.62871	3.09373	3.79249	3.78799	3.97584
Mfsd4b4	10;10;10;10;10;10;10;10	39890018;39890018;39894016;39894016;39894772;39894772;39895512;39898914	39892929;39892929;39894132;39894132;39894940;39894940;39895821;39899238	-;-;-;-;-;-;-;-	3833	4.58122	4.53679	4.38661	4.57579	4.9268	3.88647	5.49259	5.98589	4.57446	5.0621	5.93662	5.22431
Mfsd4b2	10;10;10;10	39920382;39923739;39925070;39926735	39922191;39923855;39925238;39926923	-;-;-;-	2285	0	0.0196141	0	0.0225094	0	0.0196368	0.0210838	0.019766	0.0232529	0.018745	0.0441617	0.0200082
Mfsd4b3	10;10;10;10	39946907;39949000;39950617;39959870	39948123;39949116;39950785;39960153	-;-;-;-	1787	0.192675	0.0501604	0.284403	0.086347	0.197263	0.251091	0.134797	0.075823	0.118932	0.119844	0.112937	0.102336
Mfsd4b5	10;10;10;10;10;10;10;10;10;10;10;10;10;10;10;10;10	39958061;39968153;39970143;39973592;39973592;39973592;39973629;39974604;39975098;39975098;39975098;39975098;39975098;39986382;39986382;39986382;39986475	39960490;39969973;39971152;39973708;39973708;39973708;39973708;39974818;39975266;39975257;39975266;39975266;39975266;39986646;39986639;39986643;39986640	-;-;-;-;-;-;-;-;-;-;-;-;-;-;-;-;-	6027	0.014282	0.0223088	0.0281084	0.0170679	0.0584884	0.0148897	0.0239803	0.0374691	0.0264475	0.0213202	0	0.0151713
Mfsd4b1	10;10;10;10;10;10;10	40001575;40005978;40007046;40007260;40007260;40024893;40024893	40003589;40006094;40007097;40007428;40007428;40025268;40025159	-;-;-;-;-;-;-	2729	0.0315418	0.032846	0.0465581	0.0942361	0.0738124	0.0986515	0.0882676	0.0496503	0.0389395	0.109867	0.0554651	0.0837645
Slc16a10	10;10;10;10;10;10;10;10;10;10;10;10;10;10;10;10	40033532;40037299;40040599;40040599;40056487;40056487;40067628;40075391;40076564;40076564;40080663;40080663;40132902;40141703;40141703;40141703	40037404;40037404;40040827;40040827;40056630;40056630;40067659;40077017;40076605;40077017;40080807;40080807;40133651;40142255;40142258;40142254	-;-;-;-;-;-;-;-;-;-;-;-;-;-;-;-	7356	0.56168	0.414307	0.523935	0.412535	0.219069	0.481883	0.504294	0.613991	0.628408	0.355189	0.54186	0.416415
Rpf2	10;10;10;10;10;10;10;10;10;10;10;10;10;10;10;10;10;10;10;10;10;10;10;10;10;10;10;10;10;10;10;10;10;10;10;10;10;10;10;10;10;10;10;10;10	40223246;40223427;40223683;40223813;40223888;40225297;40225297;40225297;40225297;40225297;40225340;40227559;40227559;40227559;40227559;40227559;40227559;40227762;40233108;40233108;40233108;40233108;40233108;40234822;40234822;40234822;40236123;40236123;40236123;40239748;40239748;40239748;40243856;40243856;40243856;40244585;40244585;40244585;40244585;40244585;40246543;40246953;40246953;40246953;402…	40223920;40223920;40223920;40223920;40223920;40225441;40225441;40225441;40225441;40225441;40225441;40227661;40227661;40227661;40227661;40227661;40227661;40227798;40233207;40233207;40233207;40233207;40233207;40234898;40234898;40234898;40236204;40236204;40236204;40239787;40239787;40239787;40243893;40243893;40243893;40244717;40244717;40244717;40244717;40244717;40247002;40246993;40247027;40247003;402…	-;-;-;-;-;-;-;-;-;-;-;-;-;-;-;-;-;-;-;-;-;-;-;-;-;-;-;-;-;-;-;-;-;-;-;-;-;-;-;-;-;-;-;-;-	1924	18.1192	16.935	16.2453	13.9813	15.0761	14.7157	20.0568	21.0333	17.1495	17.3867	17.2029	16.4435
Gtf3c6	10;10;10;10;10;10;10;10;10;10;10;10;10;10;10;10;10;10;10;10;10;10;10;10;10;10;10;10;10;10;10;10	40247703;40249350;40249524;40249648;40249726;40251156;40251156;40251156;40251156;40251156;40251156;40254264;40254264;40254264;40254264;40254264;40254264;40254401;40254401;40254401;40254401;40254401;40257213;40257213;40257213;40257213;40257213;40257521;40257566;40257576;40257579;40257917	40249831;40249831;40249831;40249831;40249831;40251269;40251269;40251269;40251269;40251269;40251269;40254329;40254308;40254308;40254308;40254308;40254308;40254464;40254464;40254464;40254464;40254464;40257293;40257293;40257293;40257293;40257293;40257562;40257603;40257676;40257671;40258108	-;-;-;-;-;-;-;-;-;-;-;-;-;-;-;-;-;-;-;-;-;-;-;-;-;-;-;-;-;-;-;-	2799	55.1708	61.5671	61.8717	54.2639	60.7216	56.6846	57.3849	58.6712	57.575	61.5934	66.5519	60.8439
Amd1	10;10;10;10;10;10;10;10;10;10;10;10;10;10;10;10;10;10;10;10;10;10;10;10;10	40287458;40289324;40290118;40290118;40290218;40290378;40290378;40291994;40291994;40291994;40293164;40293164;40293164;40294009;40294181;40294181;40294181;40294717;40294717;40294717;40294717;40301515;40301749;40301749;40301749	40289469;40289469;40290615;40290273;40290273;40290615;40290615;40292036;40292036;40292036;40293266;40293266;40293266;40294307;40294307;40294307;40294307;40294803;40294803;40294803;40294803;40301576;40302186;40302057;40302186	-;-;-;-;-;-;-;-;-;-;-;-;-;-;-;-;-;-;-;-;-;-;-;-;-	3542	9.53851	10.2492	9.66141	8.33516	7.57794	9.47565	9.2082	9.05344	8.9405	9.0937	8.50408	8.48028
Cdk19	10;10;10;10;10;10;10;10;10;10;10;10;10;10;10;10;10;10;10;10;10;10;10;10;10;10;10;10;10;10;10;10;10;10;10;10;10;10;10;10;10;10;10;10;10;10;10;10;10;10;10;10;10;10;10;10;10;10;10;10;10	40339564;40349308;40349337;40349358;40349526;40394325;40394325;40394325;40394325;40434304;40434304;40434304;40434304;40434304;40436072;40436072;40436072;40436072;40436072;40454015;40454015;40454015;40466638;40466638;40466638;40466638;40469579;40469579;40469579;40469579;40469579;40469886;40469886;40469886;40469886;40469886;40475569;40475569;40475569;40475569;40475569;40476157;40476157;40476157;404…	40339602;40349721;40349721;40349721;40349721;40394400;40394400;40394400;40394400;40434414;40434414;40434414;40434414;40434414;40436212;40436212;40436212;40436212;40436212;40454072;40454072;40454072;40466769;40466769;40466769;40466769;40469722;40469722;40469722;40469722;40469722;40469955;40469955;40469955;40469955;40469955;40475641;40475641;40475641;40475641;40475641;40476254;40476254;40476254;404…	+;+;+;+;+;+;+;+;+;+;+;+;+;+;+;+;+;+;+;+;+;+;+;+;+;+;+;+;+;+;+;+;+;+;+;+;+;+;+;+;+;+;+;+;+;+;+;+;+;+;+;+;+;+;+;+;+;+;+;+;+	5846	6.01482	5.73454	6.60714	6.05313	6.48648	7.20714	5.73568	5.70939	5.07154	6.66003	6.27447	7.03845
Ddo	10;10;10;10;10;10;10;10;10;10;10;10;10;10;10;10;10;10;10;10;10;10;10;10;10;10;10;10;10;10;10;10;10	40630011;40630020;40630024;40630043;40630046;40630077;40631604;40631606;40631606;40631606;40631606;40631606;40631606;40632911;40632938;40632938;40632938;40632938;40632938;40637345;40637345;40637345;40637345;40637345;40637345;40637345;40639668;40647474;40673686;40674586;40674586;40674586;40679346	40630091;40630091;40630091;40630091;40630091;40630091;40631780;40631780;40631780;40631780;40631780;40631780;40631780;40633046;40633046;40633046;40633046;40633046;40633046;40637784;40637521;40637521;40637521;40637521;40637521;40637521;40641568;40649931;40674915;40674915;40674799;40674817;40681847	+;+;+;+;+;+;+;+;+;+;+;+;+;+;+;+;+;+;+;+;+;+;+;+;+;+;+;+;+;+;+;+;+	8925	0.308625	0.261126	0.284722	0.247805	0.265193	0.2564	0.356263	0.47569	0.369103	0.230358	0.226128	0.291985
Mettl24	10;10;10;10;10	40683282;40729987;40737675;40746332;40810406	40683664;40730085;40737814;40746560;40811083	+;+;+;+;+	1529	2.28001	2.4036	2.29905	3.16207	2.30549	2.64114	2.83576	2.80621	1.87651	3.13749	2.73888	2.66119
Cdc40	10;10;10;10;10;10;10;10;10;10;10;10;10;10;10;10;10;10;10;10;10;10;10;10;10;10;10;10;10;10;10;10;10;10;10;10;10;10;10	40831621;40834176;40836288;40840488;40841354;40841700;40841700;40843042;40843042;40844460;40844961;40844961;40845164;40847130;40847130;40847924;40847924;40847924;40849745;40849745;40849745;40850930;40850930;40850930;40852497;40852497;40852497;40856375;40857547;40857547;40857547;40867824;40867824;40867824;40867824;40882887;40882887;40882887;40882887	40833356;40834320;40836364;40841487;40841487;40841815;40841815;40843143;40843143;40845006;40845937;40845006;40847204;40847204;40847204;40848063;40848063;40848063;40849841;40849841;40849841;40851069;40851069;40851069;40852580;40852580;40852580;40857676;40857676;40857676;40857676;40867910;40867910;40867910;40867910;40883140;40883092;40883109;40883311	-;-;-;-;-;-;-;-;-;-;-;-;-;-;-;-;-;-;-;-;-;-;-;-;-;-;-;-;-;-;-;-;-;-;-;-;-;-;-	8196	7.50395	6.68228	7.27059	7.25448	6.77714	7.45643	7.71199	7.34568	6.781	7.23278	7.39953	7.59747
Wasf1	10;10;10;10;10;10;10;10;10;10;10;10;10;10;10;10;10;10	40883475;40883827;40920248;40920248;40926484;40926484;40930631;40930631;40931916;40931916;40933113;40933113;40934477;40934477;40936110;40936110;40937646;40937646	40883609;40884070;40920408;40920408;40926618;40926618;40930784;40930784;40932033;40932033;40933285;40933285;40934656;40934656;40936738;40936738;40938570;40938569	+;+;+;+;+;+;+;+;+;+;+;+;+;+;+;+;+;+	2854	7.52499	6.18725	5.63907	7.64122	5.80516	6.33588	7.62991	6.74155	5.43617	6.10818	5.74554	7.16056
Fig4	10;10;10;10;10;10;10;10;10;10;10;10;10;10;10;10;10;10;10;10;10;10;10	41188172;41220899;41226922;41228107;41230007;41232107;41233552;41240505;41251717;41253640;41254844;41256421;41258015;41263069;41263885;41265386;41267687;41270299;41272958;41277358;41285290;41285601;41302987	41188699;41220985;41227004;41228302;41230090;41232254;41233610;41240643;41251883;41253788;41254889;41256537;41258148;41263166;41264047;41265486;41267815;41270447;41273008;41277514;41285413;41285699;41303260	-;-;-;-;-;-;-;-;-;-;-;-;-;-;-;-;-;-;-;-;-;-;-	3282	17.9918	14.9394	13.4077	15.5775	14.6994	16.2418	17.8203	18.9633	13.6637	17.2921	14.42	18.2067
Ak9	10;10;10;10;10;10;10;10;10;10;10;10;10;10;10;10;10;10;10;10;10;10;10;10;10;10;10;10;10;10;10;10;10;10;10;10;10;10;10;10	41303980;41316236;41317782;41320270;41320421;41325050;41327562;41335902;41337563;41340881;41345112;41345333;41347120;41347995;41348186;41351702;41357505;41358536;41367118;41370044;41382802;41383354;41383909;41388952;41392482;41396161;41399672;41402232;41406828;41407350;41408945;41420488;41422373;41422882;41424594;41427228;41428311;41430753;41432441;41433086	41304005;41316366;41317845;41320322;41320517;41325162;41327747;41336030;41337637;41340979;41345251;41345513;41347264;41348096;41348269;41351850;41357658;41358650;41367242;41370205;41382888;41383554;41384030;41389164;41392742;41396285;41399891;41402297;41407034;41407568;41409158;41420689;41422519;41423102;41424790;41427397;41428409;41430855;41432555;41434534	+;+;+;+;+;+;+;+;+;+;+;+;+;+;+;+;+;+;+;+;+;+;+;+;+;+;+;+;+;+;+;+;+;+;+;+;+;+;+;+	6968	0.210005	0.141504	0.303906	0.214062	0.137315	0.173865	0.248902	0.272236	0.14488	0.165969	0.137577	0.242766
Zbtb24	10;10;10;10;10;10;10;10;10;10;10;10;10;10;10;10;10;10;10;10	41450383;41450427;41450435;41451089;41451089;41451089;41455028;41455028;41455211;41455673;41455673;41456131;41456532;41456532;41456532;41462279;41462279;41464277;41464277;41464277	41450530;41450530;41450530;41453468;41452068;41452068;41455195;41455195;41455756;41455772;41455756;41456615;41456608;41456615;41456615;41462360;41462360;41465574;41464428;41465574	+;+;+;+;+;+;+;+;+;+;+;+;+;+;+;+;+;+;+;+	5123	5.20867	5.86146	4.65438	5.33115	4.99358	5.5354	5.7082	5.63353	4.55307	5.72713	5.27888	5.47053
Mical1	10;10;10;10;10;10;10;10;10;10;10;10;10;10;10;10;10;10;10;10;10;10;10;10;10;10;10;10;10;10;10;10;10;10;10;10;10;10;10;10;10;10;10;10;10;10;10;10;10;10;10;10;10;10;10;10;10;10;10;10;10;10;10;10;10;10;10;10;10;10;10;10;10;10;10;10;10;10;10;10;10;10;10;10;10;10;10;10;10;10;10;10;10;10;10;10;10;10;10;10;10;10;10;10;10;10;10;10;10;10;10;10;10;10;10;10;10;10;10;10;10;10;10;10;10;10;10;10	41476314;41476314;41476336;41476368;41476377;41477079;41478010;41478010;41478010;41478010;41478010;41478010;41478428;41478428;41478428;41478478;41478963;41478963;41478963;41478963;41478963;41478974;41479326;41479395;41479395;41479399;41479399;41479399;41479619;41479619;41479619;41479619;41479619;41479619;41479988;41480285;41480285;41480285;41480285;41480285;41480285;41481134;41481134;41481134;414…	41476540;41476540;41476540;41476540;41476540;41477320;41478185;41478635;41478314;41478314;41478314;41478314;41478635;41478635;41478635;41478635;41479067;41479071;41479071;41479071;41479067;41479067;41479499;41479499;41479499;41479499;41479499;41479499;41479774;41479774;41479774;41479774;41479774;41479774;41480385;41480385;41480385;41480385;41480385;41480385;41480385;41481158;41481165;41481391;414…	+;+;+;+;+;+;+;+;+;+;+;+;+;+;+;+;+;+;+;+;+;+;+;+;+;+;+;+;+;+;+;+;+;+;+;+;+;+;+;+;+;+;+;+;+;+;+;+;+;+;+;+;+;+;+;+;+;+;+;+;+;+;+;+;+;+;+;+;+;+;+;+;+;+;+;+;+;+;+;+;+;+;+;+;+;+;+;+;+;+;+;+;+;+;+;+;+;+;+;+;+;+;+;+;+;+;+;+;+;+;+;+;+;+;+;+;+;+;+;+;+;+;+;+;+;+;+;+	6047	5.92877	5.93674	5.83422	7.35744	6.74555	5.48353	7.53678	7.39434	7.33687	6.34657	6.24948	5.35287
Smpd2	10;10;10;10;10;10;10;10;10;10;10;10;10;10;10;10;10;10;10;10;10;10;10;10;10;10;10;10;10;10;10;10;10;10;10;10;10;10;10;10;10;10;10;10;10;10;10;10;10;10;10;10;10	41485642;41486702;41487172;41487172;41487178;41487549;41487639;41487672;41487672;41487672;41487672;41487672;41487993;41487993;41487993;41487993;41487993;41488031;41488177;41488177;41488177;41488177;41488359;41488429;41488433;41488433;41488433;41488734;41488734;41488734;41488734;41488734;41488931;41488931;41488931;41488931;41489017;41489275;41489275;41489275;41489275;41489464;41489464;41489464;414…	41486609;41487582;41487582;41487582;41487582;41487582;41487825;41487825;41487825;41487825;41489351;41487825;41488245;41488097;41488097;41488097;41488097;41488309;41488309;41489351;41488309;41488309;41488515;41488515;41488515;41488515;41488515;41488823;41488823;41489351;41488823;41488823;41489024;41489013;41488975;41489024;41489351;41489351;41489351;41489351;41489351;41489560;41489679;41489560;414…	-;-;-;-;-;-;-;-;-;-;-;-;-;-;-;-;-;-;-;-;-;-;-;-;-;-;-;-;-;-;-;-;-;-;-;-;-;-;-;-;-;-;-;-;-;-;-;-;-;-;-;-;-	4468	6.58874	6.95145	7.11876	8.06966	9.25343	6.98959	7.86048	8.64285	8.99027	7.28571	7.71275	6.23157
Ppil6	10;10;10;10;10;10;10;10;10;10;10;10;10;10;10	41490439;41490477;41494519;41494519;41498362;41498362;41501625;41501650;41501784;41501784;41502996;41507424;41507424;41514091;41514091	41490621;41490621;41494614;41494614;41498651;41498550;41501687;41501687;41501931;41501931;41503052;41507559;41507559;41514284;41514286	+;+;+;+;+;+;+;+;+;+;+;+;+;+;+	1169	0.662701	0.613424	0.797051	0.439983	0.73233	0.729281	0.535752	0.695444	0.772678	0.586242	0.431606	0.50842
Cd164	10;10;10;10;10;10;10;10;10;10;10;10;10;10;10;10;10;10;10;10;10	41519414;41519501;41519892;41520044;41521918;41521918;41521918;41521918;41523173;41523173;41523173;41523173;41524107;41524107;41524107;41524107;41526827;41526827;41526827;41528672;41528672	41519700;41519700;41519950;41520384;41522007;41522007;41522007;41522007;41523244;41523244;41523244;41523244;41525272;41524145;41524145;41524145;41526876;41526883;41526883;41529046;41531048	+;+;+;+;+;+;+;+;+;+;+;+;+;+;+;+;+;+;+;+;+	4449	11.7633	13.4384	11.8137	12.1042	13.1075	12.7984	11.6083	13.1567	11.4769	13.3821	12.4634	11.3038
Ccdc162	10;10;10;10;10;10;10;10;10;10;10;10;10;10;10;10;10;10;10;10;10;10;10;10;10;10;10;10;10;10;10;10;10;10;10;10;10;10;10;10;10;10;10;10;10;10;10;10;10;10;10;10;10;10;10;10;10;10;10;10;10;10;10;10;10;10;10;10;10;10;10;10;10;10;10;10;10;10;10;10;10;10;10;10;10;10;10;10;10;10;10;10;10;10;10;10;10;10;10;10;10;10;10;10;10;10;10;10;10;10;10;10;10;10;10;10;10;10;10;10;10;10;10;10;10;10;10;10;10;10;10;10;10;…	41538846;41538849;41538849;41539292;41539415;41539421;41539421;41539421;41539421;41541774;41541774;41541774;41541774;41541774;41546883;41546883;41546883;41546883;41546883;41548928;41550608;41550722;41550722;41550722;41550722;41550727;41552318;41552318;41552318;41552318;41552318;41552318;41552318;41552806;41553073;41553073;41553073;41553073;41553073;41553416;41553416;41553416;41553416;41553416;415…	41539304;41539304;41539304;41539304;41539542;41539542;41539542;41539542;41539542;41541901;41541901;41541901;41541901;41541901;41547003;41547003;41547003;41547003;41547003;41550931;41550931;41550931;41550931;41550931;41550931;41550931;41552470;41552470;41552470;41552470;41552470;41552470;41552470;41552849;41553417;41553207;41553207;41553207;41553207;41553568;41553568;41553568;41553568;41553568;415…	-;-;-;-;-;-;-;-;-;-;-;-;-;-;-;-;-;-;-;-;-;-;-;-;-;-;-;-;-;-;-;-;-;-;-;-;-;-;-;-;-;-;-;-;-;-;-;-;-;-;-;-;-;-;-;-;-;-;-;-;-;-;-;-;-;-;-;-;-;-;-;-;-;-;-;-;-;-;-;-;-;-;-;-;-;-;-;-;-;-;-;-;-;-;-;-;-;-;-;-;-;-;-;-;-;-;-;-;-;-;-;-;-;-;-;-;-;-;-;-;-;-;-;-;-;-;-;-;-;-;-;-;-;-;-;-;-;-;-;-;-;-;-;-;-;-;-	10173	0.114228	0.105735	0.0999171	0.0960628	0.148506	0.114678	0.123129	0.0887943	0.109682	0.155784	0.0843144	0.0988706
Cep57l1	10;10;10;10;10;10;10;10;10;10;10;10;10;10;10;10;10;10;10;10;10;10;10;10;10;10;10;10;10;10;10;10;10;10;10;10;10;10;10;10;10;10;10;10;10;10;10;10;10;10;10;10;10;10;10;10;10;10;10;10;10;10;10;10;10;10;10;10;10;10;10;10;10;10;10;10;10;10;10;10;10;10;10;10;10;10;10	41718840;41718841;41718841;41718846;41718846;41719225;41719847;41721173;41721557;41721557;41721557;41721557;41721557;41721557;41722884;41722884;41722884;41722884;41722884;41722884;41722884;41723861;41723861;41723861;41723861;41723861;41723861;41728524;41728628;41728628;41728628;41729331;41729331;41729331;41729331;41729331;41729331;41729331;41729331;41730999;41730999;41730999;41730999;41730999;417…	41719907;41719907;41719907;41719907;41719907;41719907;41719907;41721701;41721701;41721701;41721701;41721701;41721701;41721701;41722911;41723005;41723005;41723005;41723005;41723005;41723005;41723938;41723938;41723938;41723938;41723938;41723938;41728714;41728714;41728714;41728714;41729408;41729408;41729408;41729408;41729408;41729408;41729408;41729408;41731115;41731115;41731115;41731115;41731115;417…	-;-;-;-;-;-;-;-;-;-;-;-;-;-;-;-;-;-;-;-;-;-;-;-;-;-;-;-;-;-;-;-;-;-;-;-;-;-;-;-;-;-;-;-;-;-;-;-;-;-;-;-;-;-;-;-;-;-;-;-;-;-;-;-;-;-;-;-;-;-;-;-;-;-;-;-;-;-;-;-;-;-;-;-;-;-;-	5851	4.68564	4.99428	4.91493	4.40411	4.50997	5.56753	4.76742	5.8203	4.51326	4.82421	4.82903	5.40716
Sesn1	10;10;10;10;10;10;10;10;10;10;10;10;10;10;10;10;10;10;10;10;10;10	41809935;41887439;41894042;41894042;41894820;41894820;41896023;41896023;41898183;41898183;41898373;41902513;41902529;41902529;41903692;41903692;41905174;41905174;41906336;41906336;41907272;41907272	41811300;41887595;41894107;41894107;41895020;41895020;41896205;41896205;41898425;41898425;41898425;41902549;41902676;41902676;41903804;41903804;41905364;41905364;41906480;41906480;41908424;41908424	+;+;+;+;+;+;+;+;+;+;+;+;+;+;+;+;+;+;+;+;+;+	3982	7.71714	10.3661	9.21074	11.0179	10.9519	9.7808	10.066	11.1382	7.32547	10.4876	9.97184	8.921
Armc2	10;10;10;10;10;10;10;10;10;10;10;10;10;10;10;10;10;10;10;10;10;10;10;10;10;10;10;10;10;10;10;10;10;10;10;10;10;10;10;10;10;10;10;10;10;10;10;10;10;10;10;10;10;10;10;10;10;10;10;10;10;10;10;10;10;10;10;10;10;10;10;10;10;10;10;10;10;10;10;10;10;10;10;10;10;10;10	41914990;41914993;41915000;41916051;41916807;41922122;41922122;41922122;41922122;41922122;41922566;41922566;41922566;41922566;41922566;41923748;41923748;41923748;41923748;41923748;41924411;41924411;41924411;41924411;41924411;41926800;41926800;41926800;41926800;41926800;41947896;41947896;41947896;41947896;41947896;41951601;41951601;41951601;41951601;41951601;41963639;41963639;41963639;41963639;419…	41917219;41917219;41917219;41917219;41917219;41922282;41922282;41922282;41922282;41922282;41922698;41922698;41922698;41922698;41922698;41923861;41923861;41923861;41923861;41923861;41924533;41924533;41924533;41924533;41924533;41927100;41927100;41927100;41927100;41927100;41947995;41947995;41947995;41947995;41947995;41951746;41951746;41951746;41951746;41951746;41963862;41963862;41963862;41963862;419…	-;-;-;-;-;-;-;-;-;-;-;-;-;-;-;-;-;-;-;-;-;-;-;-;-;-;-;-;-;-;-;-;-;-;-;-;-;-;-;-;-;-;-;-;-;-;-;-;-;-;-;-;-;-;-;-;-;-;-;-;-;-;-;-;-;-;-;-;-;-;-;-;-;-;-;-;-;-;-;-;-;-;-;-;-;-;-	7188	0.167652	0.249406	0.300497	0.1932	0.15413	0.21224	0.22788	0.282754	0.229149	0.196642	0.266733	0.260777
Foxo3	10;10;10;10;10;10;10;10;10;10;10;10;10;10;10;10;10	42181841;42185786;42196268;42196466;42196466;42197554;42247431;42257606;42258296;42274816;42274816;42274816;42274816;42276526;42276526;42276526;42276526	42186295;42186295;42197901;42197901;42197901;42197901;42247786;42257700;42258366;42275545;42275541;42275545;42275545;42276696;42276755;42276752;42276742	-;-;-;-;-;-;-;-;-;-;-;-;-;-;-;-;-	7571	9.29446	8.37642	9.0791	8.80445	7.40977	9.40545	8.8577	8.82902	8.73736	8.49178	7.87709	8.55678
Lace1	10;10;10;10;10;10;10;10;10;10;10;10;10;10;10;10;10;10;10;10;10;10;10;10;10;10;10;10;10;10;10;10;10;10;10;10;10;10;10;10;10;10;10;10;10;10	42312585;42312585;42312588;42313582;42316350;42316350;42316350;42316350;42318592;42318592;42318592;42318592;42339825;42339825;42339825;42339825;42340182;42340182;42340182;42340182;42360165;42360165;42360165;42360165;42394826;42400341;42400341;42400341;42415549;42415549;42415549;42415549;42425178;42425178;42425178;42425178;42426486;42426486;42426486;42438354;42438354;42454307;42454307;42478263;424…	42313616;42313616;42313616;42313616;42316463;42316463;42316463;42316463;42318732;42318732;42318732;42318732;42339925;42339925;42339925;42339925;42340252;42340252;42340252;42340252;42360247;42360247;42360247;42360247;42395017;42400399;42400399;42400399;42415648;42415648;42415648;42415648;42425308;42425308;42425308;42425308;42426587;42426587;42426587;42438405;42438405;42454530;42454530;42478415;424…	-;-;-;-;-;-;-;-;-;-;-;-;-;-;-;-;-;-;-;-;-;-;-;-;-;-;-;-;-;-;-;-;-;-;-;-;-;-;-;-;-;-;-;-;-;-	2705	2.87986	2.98236	2.83393	2.96625	2.79252	3.89813	3.22364	2.82178	3.10352	2.97688	3.24552	3.36341
Snx3	10;10;10;10;10;10;10;10;10;10;10	42502030;42502031;42502290;42525954;42525954;42533149;42533149;42533149;42534653;42534653;42534653	42502426;42502492;42502492;42526049;42526049;42533273;42533273;42533273;42535370;42535381;42534787	+;+;+;+;+;+;+;+;+;+;+	1413	41.0894	41.0755	42.0227	38.5846	41.0566	45.9179	38.9026	33.4344	40.1976	41.0135	37.5643	43.8744
Nr2e1	10;10;10;10;10;10;10;10;10;10;10;10;10;10;10;10;10;10;10;10;10;10;10	42561963;42563272;42567489;42567489;42567836;42567836;42568373;42568373;42568657;42571373;42571484;42572746;42572746;42572858;42574356;42574356;42574356;42578166;42578166;42578166;42580198;42580669;42582882	42563526;42563526;42567594;42567594;42567985;42567985;42568469;42568469;42568828;42571519;42571519;42572981;42572981;42572981;42574443;42574443;42574443;42578311;42578311;42578311;42580345;42580774;42583632	-;-;-;-;-;-;-;-;-;-;-;-;-;-;-;-;-;-;-;-;-;-;-	3711	0.359526	0.33816	0.536395	0.291058	0.312111	0.362732	0.428408	0.632873	0.300672	0.346259	0.47586	0.431192
Ostm1	10;10;10;10;10;10;10;10;10;10;10;10;10;10;10;10;10;10;10;10;10;10;10;10;10	42583822;42583835;42583838;42583980;42583980;42583980;42678916;42678966;42683160;42683160;42683160;42683160;42692911;42692911;42692911;42692911;42696250;42696250;42696250;42696250;42698108;42698108;42698108;42700483;42700483	42583866;42583866;42583866;42584731;42584120;42584120;42679397;42679397;42683274;42683274;42683274;42683274;42693008;42693008;42693008;42693008;42699991;42696417;42696417;42696417;42698273;42698273;42698323;42702459;42700492	+;+;+;+;+;+;+;+;+;+;+;+;+;+;+;+;+;+;+;+;+;+;+;+;+	7211	2.31577	2.47989	2.17312	2.53925	2.91215	2.09074	2.13791	1.76627	2.60839	2.34624	2.47691	2.09858
Sec63	10;10;10;10;10;10;10;10;10;10;10;10;10;10;10;10;10;10;10;10;10;10;10;10;10;10;10;10;10;10;10;10;10;10;10;10;10;10;10;10;10;10;10;10;10;10;10;10;10;10;10;10;10;10;10;10;10;10;10;10;10;10	42761496;42761615;42761806;42783442;42783442;42783442;42789300;42789300;42789300;42791179;42791179;42791179;42794775;42794775;42794775;42796206;42796206;42796206;42797683;42798747;42798747;42801633;42801633;42801633;42801822;42801822;42801822;42803890;42803890;42803890;42805076;42805076;42805076;42806524;42806524;42806524;42810843;42810843;42810843;42812436;42812436;42812436;42812665;42812668;428…	42761888;42761888;42761888;42783541;42783541;42783541;42789414;42789414;42789414;42791291;42791291;42791291;42794836;42794836;42794836;42798855;42797733;42796264;42797733;42798855;42798855;42801727;42801727;42801727;42801954;42801954;42801954;42803982;42803982;42803982;42805230;42805230;42805230;42806671;42806671;42806671;42810925;42810925;42810925;42812742;42812495;42812495;42812838;42812838;428…	+;+;+;+;+;+;+;+;+;+;+;+;+;+;+;+;+;+;+;+;+;+;+;+;+;+;+;+;+;+;+;+;+;+;+;+;+;+;+;+;+;+;+;+;+;+;+;+;+;+;+;+;+;+;+;+;+;+;+;+;+;+	8787	48.647	46.4403	46.8927	52.0486	45.9857	45.7585	47.5843	46.5787	45.2057	48.3453	48.7895	47.3628
Scml4	10;10;10;10;10;10;10;10;10;10;10;10;10;10;10;10;10;10;10;10;10;10;10;10;10;10;10;10;10;10;10;10;10;10;10;10;10;10;10;10;10;10;10;10	42860370;42860543;42860667;42860793;42865514;42902473;42907717;42907717;42907717;42912017;42912017;42912017;42924054;42924054;42924054;42924054;42924054;42924054;42930404;42930404;42930404;42930404;42930404;42930404;42934141;42934338;42934916;42934953;42934953;42934953;42939881;42946869;42946869;42946869;42946869;42946869;42955889;42955889;42955889;42955889;42957619;42957619;42957619;42957619	42860853;42860626;42860853;42860853;42865716;42902547;42907795;42907795;42907795;42912231;42912231;42912231;42924183;42924183;42924183;42924183;42924183;42924183;42930604;42930419;42930604;42930604;42930554;42930604;42934361;42935147;42935147;42935139;42935147;42935147;42940572;42947141;42948199;42947141;42947141;42947141;42956034;42956034;42956034;42956034;42958721;42958770;42960778;42960780	+;+;+;+;+;+;+;+;+;+;+;+;+;+;+;+;+;+;+;+;+;+;+;+;+;+;+;+;+;+;+;+;+;+;+;+;+;+;+;+;+;+;+;+	7725	0.217283	0.145043	0.164475	0.139821	0.0782268	0.156827	0.36795	0.222172	0.0894147	0.160794	0.195941	0.254486
Sobp	10;10;10;10;10;10;10;10;10	43002500;43020982;43074593;43127779;43157908;43160706;43172974;43173976;43173976	43004414;43022918;43074688;43127930;43158093;43160844;43173522;43174530;43174521	-;-;-;-;-;-;-;-;-	5529	5.23875	5.39052	5.44629	5.42341	4.39009	5.6402	4.60068	4.501	4.43015	4.55514	4.76349	4.30809
9030612E09Rik	10	43174704	43176562	+	1859	0.74085	0.578612	0.660688	0.525684	0.487602	0.555142	0.932949	0.655977	0.657374	0.48385	0.298549	0.442677
Pdss2	10;10;10;10;10;10;10;10;10;10;10;10;10;10;10;10;10;10;10;10;10;10;10;10;10;10;10;10;10;10;10;10;10	43221486;43221486;43221517;43221600;43221736;43298799;43298799;43298799;43298799;43298799;43345528;43345528;43345528;43345528;43345528;43372135;43372135;43372135;43393871;43393871;43393871;43393921;43395561;43395561;43395561;43395561;43402513;43402726;43413515;43413515;43439799;43439799;43464625	43222060;43222060;43222060;43222060;43222013;43298933;43298933;43298933;43298933;43298933;43346519;43346116;43345726;43345726;43345726;43372209;43372209;43372209;43394044;43394044;43394044;43394044;43395692;43395692;43395692;43395692;43402627;43405395;43413547;43413547;43440248;43440602;43464882	+;+;+;+;+;+;+;+;+;+;+;+;+;+;+;+;+;+;+;+;+;+;+;+;+;+;+;+;+;+;+;+;+	5963	1.42187	1.46563	1.83245	1.42321	1.50324	1.80594	1.98749	1.83297	1.92466	1.68082	1.88687	1.53341
Bend3	10;10;10;10;10;10;10;10;10;10;10;10;10;10;10;10;10	43478831;43479140;43485234;43493165;43493642;43493642;43493642;43493642;43494146;43494146;43494146;43494146;43509847;43509847;43509847;43509847;43513963	43479372;43479372;43485413;43493466;43493689;43493689;43493689;43493689;43494342;43494342;43494342;43494342;43510045;43510091;43513816;43515396;43515396	+;+;+;+;+;+;+;+;+;+;+;+;+;+;+;+;+	6819	2.33529	2.05064	2.51543	2.48157	2.23028	2.55309	2.607	2.81496	2.43887	2.52509	2.5453	2.92321
Gm9803	10;10;10	43524084;43524106;43524260	43524646;43524175;43524645	+;+;+	563	0.0764454	0.0796062	0.225679	0.0913571	0.0894467	0.079698	0	0.160445	0.18875	0	0.179235	0
1700021F05Rik	10;10;10;10;10;10;10;10;10	43525133;43525159;43525702;43530598;43532676;43533154;43538125;43540940;43540940	43525408;43525408;43525843;43530670;43533157;43533455;43540966;43540994;43540968	-;-;-;-;-;-;-;-;-	4141	20.849	20.1093	21.3347	18.6807	19.4697	20.9018	21.267	24.4531	23.1599	19.3112	23.4789	20.5243
Cd24a	10;10;10;10;10;10	43578284;43579146;43579169;43579935;43582604;43582604	43578805;43579197;43579322;43580153;43584265;43583127	+;+;+;+;+;+	2580	1.31785	1.85874	1.78931	2.25273	1.91284	1.86089	2.3528	2.41581	1.50338	3.18752	2.13161	1.68344
Qrsl1	10;10;10;10;10;10;10;10;10;10;10;10;10;10;10;10;10;10;10;10;10;10;10;10;10;10;10;10;10;10;10	43874188;43874422;43876472;43876472;43880914;43881473;43882066;43884749;43884749;43884943;43884943;43885071;43888678;43888969;43888969;43888969;43894515;43894515;43894515;43894515;43895434;43895434;43895434;43895434;43896009;43896009;43896009;43896464;43901614;43901614;43901614	43874706;43874706;43877104;43876677;43882258;43881590;43882258;43884861;43884861;43885118;43885118;43885118;43889136;43889136;43889136;43889136;43894611;43894611;43894611;43894611;43895541;43895532;43895532;43895532;43896168;43896168;43896168;43896597;43901666;43901745;43901745	-;-;-;-;-;-;-;-;-;-;-;-;-;-;-;-;-;-;-;-;-;-;-;-;-;-;-;-;-;-;-	3876	1.21033	1.17943	1.15824	1.20756	1.41617	1.2734	1.14351	1.52648	1.0007	1.22662	1.22362	1.16774
Rtn4ip1	10;10;10;10;10;10;10;10;10;10;10;10;10;10;10;10;10;10;10;10	43901807;43907759;43909907;43910793;43921035;43921387;43921387;43928323;43928323;43932363;43932363;43935999;43935999;43946421;43946421;43946617;43947896;43949303;43953393;43956690	43902536;43907910;43909975;43910917;43921188;43921435;43921435;43928459;43928459;43932546;43932546;43936091;43936091;43947862;43947862;43946681;43948702;43949316;43953478;43957201	+;+;+;+;+;+;+;+;+;+;+;+;+;+;+;+;+;+;+;+	4554	2.32489	2.50959	2.22271	2.1572	3.17367	2.78836	2.12637	1.91412	2.2868	2.17265	2.5039	2.75075
Aim1	10;10;10;10;10;10;10;10;10;10;10;10;10;10;10;10;10;10;10;10;10;10;10;10;10;10;10;10;10;10;10;10;10;10;10;10;10;10;10;10;10;10	43950636;43950638;43956649;43956649;43958248;43958248;43958814;43958814;43961429;43961429;43964578;43964578;43966301;43966301;43967465;43967465;43967689;43967689;43973658;43973658;43973894;43973894;43975027;43975027;43976798;43976798;43979481;43979481;43986251;43986251;43989094;43989094;43992455;43992455;43992658;43992658;43997052;43997052;44003428;44003428;44065725;44148593	43951957;43951957;43956811;43956811;43958406;43958406;43958937;43958937;43961568;43961568;43964707;43964707;43966413;43966413;43967497;43967497;43967815;43967815;43973803;43973803;43974020;43974020;43975184;43975184;43976833;43976833;43979607;43979607;43986390;43986390;43989253;43989253;43992573;43992573;43992705;43992705;43999347;43999347;44004369;44004890;44065857;44148853	-;-;-;-;-;-;-;-;-;-;-;-;-;-;-;-;-;-;-;-;-;-;-;-;-;-;-;-;-;-;-;-;-;-;-;-;-;-;-;-;-;-	7525	0.50903	0.476474	0.500912	0.457951	0.294455	0.477023	0.46736	0.492166	0.374226	0.489512	0.368772	0.637935
Atg5	10;10;10;10;10;10;10;10;10;10;10	44268358;44268415;44286032;44286032;44289863;44294596;44294596;44303567;44319460;44346957;44362916	44268584;44268584;44286197;44286197;44289990;44294674;44294674;44303729;44319554;44347074;44364291	+;+;+;+;+;+;+;+;+;+;+	2352	15.3161	14.3106	13.7033	13.5364	13.4246	14.7468	15.9769	14.7478	14.5257	15.0241	14.2869	15.7838
Prdm1	10;10;10;10;10;10;10;10;10;10;10;10;10;10;10;10;10;10;10	44437177;44438293;44440659;44440659;44441059;44441059;44446717;44446792;44446792;44450119;44450119;44450119;44456625;44456625;44456625;44456981;44458467;44458467;44528366	44440242;44440242;44440787;44440787;44442164;44442164;44447044;44447044;44447044;44450238;44450238;44450238;44456870;44456870;44456870;44457059;44458687;44458748;44528501	-;-;-;-;-;-;-;-;-;-;-;-;-;-;-;-;-;-;-	5492	0.211589	0.448836	0.339312	0.271593	0.247574	0.367653	0.447378	0.394743	0.328937	0.288564	0.284795	0.366282
Prep	10;10;10;10;10;10;10;10;10;10;10;10;10;10;10	45067203;45072053;45090993;45092662;45094981;45097393;45107772;45115063;45120643;45125964;45147985;45150436;45153055;45155516;45158232	45067375;45072127;45091126;45092792;45095190;45097514;45107877;45115254;45120840;45126067;45148121;45150530;45153186;45155672;45167198	+;+;+;+;+;+;+;+;+;+;+;+;+;+;+	10933	3.49569	3.80831	3.76534	3.61304	4.49095	3.86195	3.67063	3.80473	3.76154	4.20762	3.76114	3.87227
Popdc3	10;10;10;10;10;10;10;10;10;10;10	45178098;45225437;45289305;45289402;45314561;45314561;45314561;45316431;45316483;45317699;45317699	45178192;45225571;45289575;45289575;45315279;45315114;45315279;45316539;45316539;45318452;45318117	+;+;+;+;+;+;+;+;+;+;+	2083	0.123971	0.150614	0.101662	0.0987692	0.0483519	0.129246	0.0462568	0.0433655	0.255079	0.0822511	0.169555	0.0438969
Bves	10;10;10;10;10;10;10;10;10;10	45335772;45339220;45343034;45346127;45347785;45353508;45353750;45354751;45354751;45369191	45335881;45339456;45343158;45346314;45347893;45353917;45353917;45354834;45354892;45372479	+;+;+;+;+;+;+;+;+;+	4610	0.354766	1.24441	1.11163	0.970664	0.61173	0.749455	0.209008	0.303714	1.3946	1.25431	0.645733	0.386774
Lin28b	10;10;10;10;10;10;10;10;10;10;10;10;10	45376620;45418363;45419137;45420524;45420524;45456583;45469037;45469037;45469037;45470051;45476348;45485428;45486227	45381431;45419208;45419208;45420708;45420708;45458903;45469218;45469218;45469218;45470201;45476396;45485777;45486395	-;-;-;-;-;-;-;-;-;-;-;-;-	9065	0.0427301	0.0346087	0.060737	0.0283696	0.0222211	0.0346486	0.0106291	0.039859	0.0293067	0.0189001	0.0278294	0.0302606
Hace1	10;10;10;10;10;10;10;10;10;10;10;10;10;10;10;10;10;10;10;10;10;10;10;10;10;10;10;10;10;10;10;10;10;10;10;10;10;10;10;10;10;10;10;10;10;10;10;10;10;10;10;10;10;10;10;10;10;10;10;10;10;10;10;10	45577829;45578141;45578280;45588380;45588380;45588380;45588384;45589481;45589481;45589481;45589481;45590268;45590268;45590268;45590268;45605509;45605509;45605509;45605509;45618498;45618498;45638321;45638321;45648591;45648591;45648854;45649881;45652588;45670346;45671132;45671439;45671514;45672328;45672328;45672539;45672539;45672558;45672774;45672774;45672774;45676381;45676381;45676381;45677067;456…	45578150;45578150;45578414;45588434;45588434;45588434;45588460;45589570;45589570;45589570;45589570;45590372;45590372;45590372;45590372;45605584;45605587;45605633;45605584;45618629;45618629;45638403;45638403;45648647;45648687;45648955;45649987;45652738;45670680;45671200;45671526;45671526;45672439;45672439;45672636;45672636;45672636;45672861;45672861;45672861;45676530;45676530;45676530;45677263;456…	+;+;+;+;+;+;+;+;+;+;+;+;+;+;+;+;+;+;+;+;+;+;+;+;+;+;+;+;+;+;+;+;+;+;+;+;+;+;+;+;+;+;+;+;+;+;+;+;+;+;+;+;+;+;+;+;+;+;+;+;+;+;+;+	12851	0.937736	1.05324	1.14359	1.08063	0.846427	0.865906	1.01219	1.05436	0.851715	0.983233	1.08361	0.93209
Grik2	10;10;10;10;10;10;10;10;10;10;10;10;10;10;10;10;10;10;10;10;10;10;10;10;10;10;10;10;10;10;10;10	49099843;49105018;49113370;49113370;49132679;49132679;49240579;49240579;49244325;49244325;49272740;49272740;49355909;49355909;49404337;49404337;49419668;49419668;49422529;49422529;49523682;49523682;49527987;49527987;49535318;49535318;49573564;49573564;49578135;49578135;49783145;49783145	49101272;49105065;49113620;49113620;49132904;49132904;49240796;49240796;49244443;49244443;49272963;49272963;49356115;49356115;49404450;49404450;49419775;49419775;49422672;49422672;49523855;49523855;49528040;49528040;49535499;49535499;49573821;49573821;49578302;49578302;49783259;49783259	-;-;-;-;-;-;-;-;-;-;-;-;-;-;-;-;-;-;-;-;-;-;-;-;-;-;-;-;-;-;-;-	4040	0.0213063	0.0776555	0.041933	0.0509248	0.0747898	0.111064	0.0476995	0.0111795	0.0920621	0.0424082	0.0124888	0.0113165
Ascc3	10;10;10;10;10;10;10;10;10;10;10;10;10;10;10;10;10;10;10;10;10;10;10;10;10;10;10;10;10;10;10;10;10;10;10;10;10;10;10;10;10;10	50592669;50604751;50607920;50617712;50637908;50642523;50644943;50645663;50649109;50649793;50650547;50658918;50660655;50690115;50699940;50700432;50707663;50710880;50713176;50714266;50716485;50718292;50720612;50721773;50728090;50729912;50731613;50732422;50732687;50735210;50748806;50749035;50750453;50753997;50767091;50767373;50823636;50840298;50842143;50845531;50849471;50850461	50592897;50604882;50608070;50618271;50638028;50642730;50645084;50645788;50649309;50649933;50650711;50659094;50660726;50690249;50700131;50700656;50707782;50711044;50713262;50714442;50716710;50718446;50720710;50721941;50728310;50729997;50731779;50732567;50732807;50735352;50748943;50749155;50750585;50754122;50767202;50767507;50823860;50840449;50842290;50845740;50849646;50851202	+;+;+;+;+;+;+;+;+;+;+;+;+;+;+;+;+;+;+;+;+;+;+;+;+;+;+;+;+;+;+;+;+;+;+;+;+;+;+;+;+;+	7477	2.45212	3.87822	2.30539	2.75847	4.02087	3.04854	2.31958	2.09003	1.9471	4.46253	2.62497	2.70876
Sim1	10;10;10;10;10;10;10;10;10;10;10	50895651;50904785;50907910;50908478;50908718;50909380;50909796;50910524;50940466;50981323;50983611	50896071;50904867;50907999;50908586;50908803;50909579;50909902;50910671;50940634;50981722;50989152	+;+;+;+;+;+;+;+;+;+;+	7355	0	0	0	0	0	0	0	0	0	0	0.0137198	0
Lilrb4a	10;10;10;10;10;10;10;10;10;10;10;10;10;10;10;10;10;10	51480679;51480906;51481140;51481567;51482869;51483762;51484517;51485713;51485888;51491018;51491197;51491434;51491861;51493170;51494062;51494793;51495994;51496167	51480753;51480941;51481424;51481869;51482904;51483878;51484569;51485780;51486219;51491051;51491232;51491718;51492163;51493205;51494178;51494845;51496059;51496613	+;+;+;+;+;+;+;+;+;+;+;+;+;+;+;+;+;+	2682	6.35471	8.63947	6.22179	9.0326	3.52998	3.31255	5.90979	8.70634	9.23191	4.07242	6.88532	7.24476
Fam162b	10;10;10;10	51585420;51587195;51590061;51590265	51585590;51587303;51590169;51590480	-;-;-;-	605	1.42277	0	0.210012	0.425075	0.166474	0	0.0796305	0	0	0	0	0.226704
Gprc6a	10;10;10;10;10;10	51614823;51616583;51620898;51626431;51628249;51631238	51615979;51616706;51621110;51627267;51628552;51631458	-;-;-;-;-;-	2856	0.0904175	0	0.0296585	0.0720365	0.0528976	0.0314216	0	0.0158141	0	0	0	0.0160079
Rfx6	10;10;10;10;10;10;10;10;10;10;10;10;10;10;10;10;10;10;10;10;10;10;10;10;10;10;10;10;10;10;10;10;10;10;10	51677760;51678285;51681810;51683580;51685518;51693696;51693696;51695000;51695000;51708575;51708575;51711813;51711813;51711981;51711981;51713467;51713467;51715890;51715890;51718063;51718063;51719947;51719947;51721501;51721501;51723001;51723001;51723733;51723733;51725367;51725367;51726682;51726682;51729631;51729631	51678029;51678441;51681933;51683641;51685761;51693773;51693773;51695027;51695027;51708682;51708682;51711890;51711890;51712094;51712094;51713516;51713516;51716049;51716049;51718207;51718207;51720056;51720056;51721618;51721618;51723123;51723123;51723939;51723939;51725879;51725879;51726894;51726894;51730429;51730429	+;+;+;+;+;+;+;+;+;+;+;+;+;+;+;+;+;+;+;+;+;+;+;+;+;+;+;+;+;+;+;+;+;+;+	3701	0	0	0	0.0138973	0	0.0121237	0	0	0	0	0	0
Vgll2	10;10;10;10;10;10	52022686;52022723;52025057;52025057;52027431;52027434	52022803;52022803;52025363;52025363;52028471;52028011	+;+;+;+;+;+	1466	0.0293579	0	0	0	0	0.0306071	0.0328625	0	0	0	0	0.062372
Ros1	10;10;10;10;10;10;10;10;10;10;10;10;10;10;10;10;10;10;10;10;10;10;10;10;10;10;10;10;10;10;10;10;10;10;10;10;10;10;10;10;10;10;10;10	52045926;52050874;52064674;52066213;52067005;52072054;52073068;52075813;52077849;52081959;52085164;52087881;52090946;52096022;52098670;52099997;52101709;52115886;52118120;52120796;52123217;52124058;52125719;52128417;52128939;52129563;52130886;52142140;52143247;52144765;52145748;52154782;52161809;52162706;52163885;52165340;52166046;52168603;52169965;52172841;52178947;52180162;52181779;52194831	52046326;52051037;52064808;52066413;52067102;52072183;52073132;52075975;52077984;52082042;52085354;52087998;52091114;52096198;52098902;52100141;52101908;52116062;52118403;52121001;52123419;52124121;52125981;52128561;52129099;52129777;52130986;52142331;52143425;52144875;52145960;52155278;52161906;52162890;52164007;52165416;52166247;52168741;52170113;52172901;52178973;52180221;52181823;52195244	-;-;-;-;-;-;-;-;-;-;-;-;-;-;-;-;-;-;-;-;-;-;-;-;-;-;-;-;-;-;-;-;-;-;-;-;-;-;-;-;-;-;-;-	7401	0.00581526	0.00605571	0.00572252	0	0	0	0	0.00610258	0.00717916	0.0115747	0.0136346	0
Dcbld1	10;10;10;10;10;10;10;10;10;10;10	52233619;52261727;52284103;52286348;52290851;52304587;52311400;52312814;52314355;52317032;52319476	52233835;52261939;52284237;52286399;52290923;52304720;52311440;52312901;52314404;52317151;52321377	+;+;+;+;+;+;+;+;+;+;+	3025	1.39431	1.51123	1.44208	1.42825	1.33179	1.54264	1.35372	1.91112	1.15927	1.35931	1.31766	1.51136
Gopc	10;10;10;10;10;10;10;10;10;10;10;10;10;10;10;10	52337024;52337024;52346049;52346049;52349072;52349072;52350601;52350601;52353327;52353327;52354572;52354572;52358749;52358773;52381611;52381611	52339853;52339853;52346229;52346229;52349236;52349236;52350696;52350696;52353492;52353492;52354747;52354747;52358937;52358937;52382124;52382124	-;-;-;-;-;-;-;-;-;-;-;-;-;-;-;-	4317	17.048	17.4518	18.1398	17.5379	16.9378	17.6175	16.84	15.2539	17.1079	18.7224	17.6597	16.4998
Gm26741	10	52358767	52358853	+	87	11.8728	19.5758	15.5779	16.5535	20.2592	17.5354	9.96754	10.3828	8.55014	16.7391	17.3982	19.4436
Nepn	10;10;10	52391608;52400359;52403905	52391828;52401260;52404604	+;+;+	1823	0	0.0245849	0.0232322	0	0	0	0	0.0247752	0	0	0	0
Nus1	10;10;10;10;10	52417547;52429193;52430067;52433345;52436577	52418168;52429318;52430216;52433444;52440192	+;+;+;+;+	4614	8.69357	9.0336	8.90373	7.40186	8.14205	8.32438	8.14426	7.37092	6.98997	8.61473	8.96681	7.05498
Slc35f1	10;10;10;10;10;10;10;10	52690533;52933092;53021844;53062451;53073454;53077897;53089338;53108148	52691169;52933267;53021971;53062610;53073610;53077949;53089492;53111622	+;+;+;+;+;+;+;+	4941	0.304869	0.26305	0.145718	0.312289	0.142687	0.190704	0.29251	0.30165	0.182809	0.286069	0.204229	0.240576
Cep85l	10;10;10;10;10;10;10;10;10;10;10;10;10	53278081;53281349;53283837;53291764;53292258;53296214;53298053;53301502;53312508;53319598;53348472;53358049;53379509	53278244;53281580;53283944;53291814;53292375;53296368;53298205;53301681;53312625;53319719;53349259;53358207;53379851	-;-;-;-;-;-;-;-;-;-;-;-;-	2691	4.2383	4.44686	4.9419	5.63844	4.248	4.90218	4.70844	4.64911	2.82349	4.93423	4.16237	5.55556
Pln	10;10;10;10;10	53337686;53337686;53341982;53343757;53343757	53337795;53337795;53342108;53345999;53345999	+;+;+;+;+	2480	0.312378	0.253007	0.170776	0.45627	0.121835	0.253298	0.543928	0.965224	0.192821	0.345422	0.183102	0.387134
Tmem229b-ps	10	53474964	53475467	+	504	0	0	0	0.102052	0	0	0	0	0	0	0	0
Mcm9	10;10;10;10;10;10;10;10;10;10;10;10;10;10	53536329;53540938;53541537;53547403;53548497;53563283;53611352;53612827;53615852;53620134;53622756;53625716;53629724;53630395	53538767;53541083;53541619;53547606;53548699;53563457;53611471;53612952;53616052;53620215;53623072;53626034;53630131;53630439	-;-;-;-;-;-;-;-;-;-;-;-;-;-	4868	3.96968	3.90365	4.12387	4.9342	3.62068	4.88519	5.29466	4.79672	3.73284	3.93304	4.28057	4.64888
Asf1a	10;10;10;10	53596961;53602348;53606109;53607665	53597298;53602463;53606285;53609213	+;+;+;+	2180	7.62062	7.70957	7.7905	6.93652	6.46806	6.83341	10.453	11.2913	7.385	6.71956	8.10053	7.46598
Fam184a	10;10;10;10;10;10;10;10;10;10;10;10;10;10;10;10;10;10;10;10;10;10;10;10;10;10;10;10;10;10;10;10;10;10;10;10;10;10;10;10;10;10;10;10;10;10;10;10;10;10;10;10;10;10;10;10;10;10;10;10;10;10;10;10;10;10;10;10;10;10;10;10;10;10;10;10;10;10;10	53633145;53633366;53633369;53633370;53633630;53633634;53634302;53634302;53635232;53635232;53635232;53635232;53635400;53638177;53638177;53638177;53638177;53638177;53638180;53640945;53640945;53640945;53640945;53640945;53640945;53646983;53646983;53646983;53646983;53647572;53647572;53647572;53647572;53647572;53649102;53649102;53649102;53649102;53649102;53652300;53652300;53652300;53652300;53652300;536…	53633715;53633715;53633715;53633715;53633715;53633715;53634395;53634395;53635434;53635434;53635434;53635434;53635434;53638281;53638269;53638281;53638281;53638281;53638281;53641062;53641062;53641062;53641062;53641062;53641062;53647129;53647080;53647129;53647129;53647756;53647756;53647756;53647756;53647756;53649229;53649229;53649229;53649229;53649229;53652453;53652453;53652453;53652453;53652453;536…	-;-;-;-;-;-;-;-;-;-;-;-;-;-;-;-;-;-;-;-;-;-;-;-;-;-;-;-;-;-;-;-;-;-;-;-;-;-;-;-;-;-;-;-;-;-;-;-;-;-;-;-;-;-;-;-;-;-;-;-;-;-;-;-;-;-;-;-;-;-;-;-;-;-;-;-;-;-;-	4353	3.69779	3.0579	3.24964	4.26549	2.19805	3.31912	3.54157	3.76636	2.45342	3.4439	2.36452	4.5162
Man1a	10;10;10;10;10;10;10;10;10;10;10;10;10;10;10;10;10;10;10;10;10;10;10;10;10;10;10;10;10;10;10;10;10;10;10;10;10;10;10;10;10;10;10	53904788;53907015;53907943;53907943;53919158;53919158;53920043;53920043;53925430;53925430;53933492;53933492;53934889;53934889;53975095;53977023;53977023;54005161;54013305;54014415;54014415;54014415;54014415;54025714;54025714;54025714;54025714;54025714;54030698;54030698;54030698;54030698;54030698;54074416;54074416;54074416;54074416;54074416;54075504;54075526;54075526;54075526;54075526	53907563;53907563;53908058;53908058;53919330;53919330;53920262;53920262;53925545;53925545;53933585;53933585;53935012;53935012;53977117;53977117;53977117;54006024;54014495;54014495;54014495;54014495;54014495;54025829;54025829;54025829;54025829;54025829;54030794;54030794;54030794;54030794;54030794;54075270;54075270;54075270;54075270;54075270;54075709;54075737;54075736;54075709;54075796	-;-;-;-;-;-;-;-;-;-;-;-;-;-;-;-;-;-;-;-;-;-;-;-;-;-;-;-;-;-;-;-;-;-;-;-;-;-;-;-;-;-;-	9058	1.53472	1.68229	1.96379	2.07826	2.77422	2.3183	1.94131	1.79504	1.66004	2.44472	2.0554	1.93313
Tbc1d32	10;10;10;10;10;10;10;10;10;10;10;10;10;10;10;10;10;10;10;10;10;10;10;10;10;10;10;10;10;10;10;10;10	56014298;56027899;56040139;56048863;56049762;56051389;56064474;56072476;56087531;56088306;56089717;56123511;56129061;56150794;56151766;56155680;56161135;56162011;56170844;56173842;56177492;56180480;56187743;56192840;56195356;56196408;56196558;56196788;56198435;56201888;56214950;56224564;56228478	56017704;56028087;56040279;56049017;56049877;56051458;56064557;56072601;56087624;56088414;56089839;56123599;56129177;56150912;56151853;56155818;56161217;56162212;56170971;56173984;56177584;56180620;56187833;56192899;56195500;56196469;56196661;56196866;56198560;56201956;56215118;56224725;56228689	-;-;-;-;-;-;-;-;-;-;-;-;-;-;-;-;-;-;-;-;-;-;-;-;-;-;-;-;-;-;-;-;-	7235	2.25455	2.1991	2.1425	2.05452	2.10204	2.23265	2.56364	2.79044	1.88738	2.04245	2.51053	2.28119
Msl3l2	10;10	56106917;56114854	56107029;56116880	+;+	2140	3.90164	3.58128	3.26549	2.88415	3.08269	3.48057	4.84016	4.49542	3.52565	3.983	3.2772	3.41822
Gja1	10;10	56377300;56387534	56377518;56390419	+;+	3105	525.849	383.951	361.202	390.17	336.145	363.064	415	437.993	295.029	393.974	460.576	462.34
Gm9956	10	56745134	56748254	+	3121	0.0275801	0.057441	0.0542805	0.01648	0.0322707	0.0431304	0.0308724	0.0434142	0.051073	0.0411717	0.0161662	0.0146487
Hsf2	10;10;10;10;10;10;10;10;10;10;10;10	57486385;57495898;57496155;57497497;57499416;57501370;57502623;57504582;57505146;57506197;57511444;57511903	57486601;57496006;57496282;57497621;57499491;57501431;57502710;57504730;57505382;57506302;57511528;57513133	+;+;+;+;+;+;+;+;+;+;+;+	2613	7.37901	7.5469	6.67783	6.14138	6.59112	5.68387	6.87708	7.70903	5.59188	5.78637	6.66164	6.49125
Serinc1	10;10;10;10;10;10;10;10;10;10;10;10;10;10;10;10;10;10;10;10;10;10;10;10;10;10	57515774;57519363;57519698;57522956;57523035;57523184;57523961;57523961;57523961;57524320;57524320;57524320;57525225;57525231;57525325;57525325;57525366;57527665;57527665;57527665;57527665;57532357;57532357;57532357;57532357;57532357	57517292;57519593;57519842;57523216;57523216;57523216;57524098;57523987;57524098;57524399;57524399;57524399;57527826;57525494;57525494;57525494;57525494;57527826;57527826;57527826;57527826;57532410;57532477;57532409;57532428;57532530	-;-;-;-;-;-;-;-;-;-;-;-;-;-;-;-;-;-;-;-;-;-;-;-;-;-	5150	14.934	16.8917	14.3011	16.369	16.5156	14.1667	16.7916	17.8731	15.3518	16.9416	16.6647	13.831
Pkib	10;10;10;10;10;10;10;10;10;10;10;10;10;10;10;10;10;10;10;10;10;10;10;10;10;10;10;10;10;10;10;10;10;10;10;10;10;10;10;10;10;10;10;10;10;10;10;10;10;10;10	57631981;57632051;57632056;57632094;57632124;57640960;57645834;57645885;57646416;57650981;57650994;57652082;57652082;57652082;57652082;57652082;57652082;57652082;57652082;57652082;57652082;57692203;57692203;57692203;57692203;57692203;57692203;57692203;57692203;57692203;57699623;57708074;57708074;57708074;57716243;57727981;57728090;57728090;57728090;57728090;57728090;57728090;57728090;57728148;577…	57632207;57632207;57632207;57632207;57632207;57641101;57645955;57645955;57646451;57651401;57651305;57652173;57654740;57652173;57652173;57652173;57652173;57652173;57652173;57652173;57652173;57692270;57692270;57692270;57692270;57692270;57692270;57692270;57692270;57692270;57699734;57709635;57710369;57708181;57716906;57728033;57728266;57728266;57728266;57728266;57728266;57728150;57728266;57728266;577…	+;+;+;+;+;+;+;+;+;+;+;+;+;+;+;+;+;+;+;+;+;+;+;+;+;+;+;+;+;+;+;+;+;+;+;+;+;+;+;+;+;+;+;+;+;+;+;+;+;+;+	11800	0.160483	0.14433	0.154335	0.122047	0.076818	0.121681	0.126565	0.118654	0.148592	0.0943762	0.15393	0.166602
Fabp7	10;10;10;10;10;10;10	57784881;57784923;57785506;57785506;57786265;57786265;57788123	57785081;57785081;57785678;57785678;57786366;57786812;57788450	+;+;+;+;+;+;+	1250	0.378741	0.143419	0.271055	0.370325	0.805736	0.107688	0.462494	0.361322	0.425064	0.479722	0.403638	0.365749
Smpdl3a	10;10;10;10;10;10;10;10;10;10;10;10;10;10;10;10	57794335;57794374;57794568;57800911;57800911;57800916;57802420;57802420;57802420;57805567;57805567;57807355;57807355;57807877;57809046;57811213	57794409;57794784;57794849;57801124;57801124;57801124;57802564;57802506;57802564;57805663;57805663;57807470;57807524;57808057;57809170;57811830	+;+;+;+;+;+;+;+;+;+;+;+;+;+;+;+	2065	2.00083	1.82312	1.12803	2.3164	1.92655	2.21634	1.65643	2.66836	1.49236	2.38533	1.63703	1.9483
Duxf3	10;10;10	58229979;58230651;58231613	58231063;58232675;58232013	-;-;-	2697	0.015958	0	0	0	0	0.033274	0	0	0.0197008	0	0	0.0339034
Gm4981	10	58234848	58236701	-	1854	0.208926	0.193391	0.159906	0.194195	0	0.363026	0.441747	0.267971	0.143293	0.138616	0.27214	0.246595
Gcc2	10;10;10;10;10;10;10;10;10;10;10;10;10;10;10;10;10;10;10;10;10;10;10;10;10;10;10;10;10;10;10;10;10;10;10;10;10;10;10;10;10;10;10;10;10;10;10;10;10;10;10;10;10;10;10;10;10;10;10;10;10;10;10;10;10;10;10;10;10;10;10;10;10;10;10;10;10;10;10;10;10;10;10;10;10;10;10;10;10;10;10;10;10;10;10;10;10;10	58255497;58255508;58255530;58255539;58255713;58255829;58255829;58255829;58255829;58255891;58256747;58256820;58256820;58256820;58256820;58258241;58258241;58258241;58258241;58258241;58258241;58267967;58267967;58267967;58267967;58267967;58267967;58269262;58269262;58269262;58269262;58269262;58272333;58272333;58272333;58273446;58274736;58274736;58274736;58274936;58274936;58274936;58274936;58274957;582…	58255571;58255571;58255571;58255571;58255882;58255882;58255882;58255882;58255882;58255925;58256904;58256904;58256904;58256896;58256904;58258308;58258308;58258308;58258308;58258308;58258308;58268046;58268071;58268071;58268071;58268071;58268071;58269335;58271706;58271706;58269463;58271706;58272405;58272405;58272405;58274836;58274836;58274836;58274836;58276294;58275034;58275034;58275034;58275034;582…	+;+;+;+;+;+;+;+;+;+;+;+;+;+;+;+;+;+;+;+;+;+;+;+;+;+;+;+;+;+;+;+;+;+;+;+;+;+;+;+;+;+;+;+;+;+;+;+;+;+;+;+;+;+;+;+;+;+;+;+;+;+;+;+;+;+;+;+;+;+;+;+;+;+;+;+;+;+;+;+;+;+;+;+;+;+;+;+;+;+;+;+;+;+;+;+;+;+	9630	6.30609	6.62268	6.4694	7.11958	7.22694	8.0561	7.04387	7.37745	5.52296	7.50343	6.51248	7.75746
Lims1	10;10;10;10;10;10;10;10;10;10;10;10;10;10;10;10;10;10;10;10;10;10;10;10;10;10;10;10;10;10;10;10;10;10;10;10;10;10	58323466;58394373;58394388;58399021;58399021;58399021;58408057;58408070;58408070;58408070;58409560;58409560;58409560;58409560;58410053;58410053;58410053;58410053;58412403;58412403;58412403;58413973;58413973;58413973;58416634;58416634;58416634;58416643;58418399;58418399;58418399;58418399;58418647;58418648;58421454;58421454;58421454;58421454	58323687;58394600;58394600;58399180;58399180;58399180;58408136;58408136;58408136;58408136;58409680;58409680;58409680;58409680;58410336;58410202;58410202;58410202;58412553;58412553;58412553;58414065;58414065;58414065;58416682;58416682;58416682;58416682;58418474;58418474;58418474;58418474;58418786;58418835;58421664;58421578;58421783;58424691	+;+;+;+;+;+;+;+;+;+;+;+;+;+;+;+;+;+;+;+;+;+;+;+;+;+;+;+;+;+;+;+;+;+;+;+;+;+	4891	4.84857	5.15901	5.47264	4.9741	4.96275	6.14657	5.04321	4.79263	4.93199	5.72732	5.54991	4.76723
Ranbp2	10;10;10;10;10;10;10;10;10;10;10;10;10;10;10;10;10;10;10;10;10;10;10;10;10;10;10;10;10	58446852;58451984;58453312;58454573;58455219;58455809;58457592;58460518;58461836;58463819;58464083;58464405;58465065;58465444;58465663;58467115;58467390;58470627;58475244;58476157;58483029;58483897;58484442;58485680;58488573;58490610;58492411;58492802;58493663	58447051;58452051;58453423;58454725;58455449;58455954;58457784;58460605;58462045;58464000;58464258;58464528;58465226;58465581;58465809;58467294;58467473;58470762;58475338;58480819;58483199;58483983;58484620;58485881;58488674;58490755;58492684;58493136;58494155	+;+;+;+;+;+;+;+;+;+;+;+;+;+;+;+;+;+;+;+;+;+;+;+;+;+;+;+;+	9477	17.5752	17.3513	17.0133	16.8842	15.5374	16.5096	16.5723	17.457	15.0871	16.2073	17.0046	16.1947
Ccdc138	10;10;10;10;10;10;10;10;10;10;10;10;10;10;10;10	58497970;58499169;58499362;58507521;58509505;58513079;58524138;58527342;58528323;58528905;58538249;58540798;58544917;58561901;58573589;58575689	58498062;58499213;58499419;58507641;58509632;58513257;58524296;58527461;58528400;58529012;58538410;58540914;58545109;58562077;58573727;58576242	+;+;+;+;+;+;+;+;+;+;+;+;+;+;+;+	2431	1.20388	1.43802	1.81187	1.37524	1.55363	1.66117	1.60522	1.65352	1.94522	1.12763	1.5566	1.78662
Edar	10;10;10;10;10;10;10;10;10;10;10;10	58600789;58606045;58607340;58609938;58610274;58610447;58611957;58621313;58628460;58629366;58630064;58675456	58603184;58606105;58607499;58610010;58610348;58610572;58612043;58621398;58628641;58629488;58630132;58675654	-;-;-;-;-;-;-;-;-;-;-;-	3637	0.0710015	0.542207	0.186318	0.0424257	0.983077	0.29609	0.119216	0.0620913	0.0876541	1.63698	0.221962	0.0754226
BB019430	10	58703995	58704279	+	285	0	0	0	0	0	0	0	0	0	0	0.177034	0
Gm17542	10;10	58713606;58718173	58713666;58718210	-;-	99	0	0	0	0	0	0	0.486631	0	0	0	0	0
Sh3rf3	10;10;10;10;10;10;10;10;10;10;10;10;10;10;10;10;10;10;10;10;10;10;10;10;10;10;10	58813359;58813458;58814059;58983921;58983921;58983921;59007042;59007042;59007042;59049221;59049221;59065651;59071936;59071936;59080034;59083448;59083448;59083448;59084982;59086660;59086660;59086660;59104172;59104172;59104172;59130971;59135820	58814126;58814126;58814126;58984196;58984196;58984196;59007193;59007137;59007137;59049580;59050020;59066102;59072036;59072036;59080104;59083618;59083618;59083618;59085035;59086916;59086916;59086916;59104879;59104357;59104491;59131305;59138916	+;+;+;+;+;+;+;+;+;+;+;+;+;+;+;+;+;+;+;+;+;+;+;+;+;+;+	7242	0.665609	0.934488	0.947402	1.03692	0.611923	0.85502	0.838198	0.729678	0.630963	0.703817	0.633993	0.751246
2023-09-10	10;10;10;10;10;10;10;10;10;10	59164113;59166504;59170814;59176848;59178761;59181020;59183525;59192166;59192698;59221391	59164944;59166691;59170946;59177016;59178857;59181181;59183711;59192361;59192815;59221847	-;-;-;-;-;-;-;-;-;-	2539	38.3603	33.4858	36.9311	40.5557	38.4581	40.8407	37.9112	35.7906	31.2855	38.0919	36.3457	40.9109
Sowahc	10	59221953	59226434	+	4482	2.80395	2.5999	2.73089	2.60498	2.44939	3.27365	2.46149	2.41849	2.24055	2.42735	3.35464	2.51953
P4ha1	10;10;10;10;10;10;10;10;10;10;10;10;10;10;10;10;10;10;10;10;10;10;10;10;10;10;10;10;10;10;10;10;10;10;10;10;10;10;10;10;10;10;10;10	59323296;59323364;59323368;59337054;59337054;59337054;59339296;59339296;59339296;59342684;59342684;59342684;59343657;59343657;59343657;59348181;59348181;59350404;59350404;59350404;59352083;59352083;59352083;59354340;59355350;59355350;59361861;59361861;59361861;59365289;59365289;59365289;59367289;59367289;59367289;59369241;59369241;59369241;59369587;59369587;59369587;59371004;59371004;59371004	59323476;59323476;59323476;59337156;59337156;59337156;59339392;59339392;59339392;59342835;59342835;59342835;59343794;59343794;59343794;59348420;59348420;59350600;59350600;59350600;59352259;59352259;59352259;59354410;59355420;59355420;59361960;59361960;59361960;59365342;59365342;59365342;59367354;59367354;59367354;59369309;59369309;59369309;59369683;59369683;59369683;59372251;59371956;59373304	+;+;+;+;+;+;+;+;+;+;+;+;+;+;+;+;+;+;+;+;+;+;+;+;+;+;+;+;+;+;+;+;+;+;+;+;+;+;+;+;+;+;+;+	4114	29.6584	27.0391	27.4251	26.2671	19.9035	21.6061	21.9101	19.849	21.4133	26.3407	27.4104	29.2826
Gm10273	10	59395632	59396757	+	1126	1.79647	1.91055	0.940328	1.05061	1.20753	1.8729	1.24078	1.68467	2.07624	1.86393	1.12022	1.58351
Pla2g12b	10;10;10;10;10;10;10	59403660;59410977;59411027;59416348;59416348;59421372;59421463	59403981;59411065;59411065;59416513;59416513;59421970;59421976	+;+;+;+;+;+;+	1182	0.182059	0.151669	0.250818	0	0.213022	0.113883	0.122275	0.229265	0.134855	0.0362371	0.298801	0.42547
Oit3	10;10;10;10;10;10;10;10;10;10;10;10	59422958;59425377;59427944;59428293;59429491;59429491;59430893;59430893;59435867;59437710;59438541;59441623	59424112;59425476;59428359;59428359;59429651;59429651;59431086;59431015;59435989;59437817;59438915;59441778	-;-;-;-;-;-;-;-;-;-;-;-	2788	0.524863	0.192905	0.15191	0.258277	0.379314	0.24141	0.777597	0.469796	0.400213	0.445529	0.217165	0.295171
Mcu	10;10;10;10;10;10;10;10;10;10;10;10;10;10;10;10;10;10;10;10;10;10	59446984;59448597;59451206;59451206;59454946;59454946;59456649;59456649;59457826;59466454;59467626;59491087;59532846;59599928;59600581;59602011;59602775;59606133;59616524;59616524;59616524;59616524	59448858;59448858;59451322;59451322;59455149;59455149;59456809;59456809;59458160;59466558;59467796;59491156;59535106;59600070;59600693;59603177;59603177;59606177;59616675;59616655;59616679;59616692	-;-;-;-;-;-;-;-;-;-;-;-;-;-;-;-;-;-;-;-;-;-	6936	1.76846	2.31975	2.02114	1.95028	2.94048	2.20598	1.80592	2.05119	2.36708	2.26018	2.13138	1.46991
Gm10322	10	59616063	59616398	+	336	0	0	0.126049	0	0	0	0	0	0	0.127477	0	0
Micu1	10;10;10;10;10;10;10;10;10;10;10;10;10;10;10;10;10;10;10;10;10;10;10;10;10;10;10;10;10;10;10;10;10;10;10;10;10;10;10;10;10;10;10;10;10;10;10;10;10;10;10;10;10;10;10;10;10;10;10;10;10;10;10;10;10;10;10;10;10;10;10;10;10;10;10;10;10;10;10;10;10;10	59702477;59702563;59702599;59702618;59702628;59702649;59702658;59727957;59727957;59727957;59727957;59727957;59727957;59727992;59732983;59732983;59732983;59732983;59732983;59732983;59732983;59740084;59740660;59740660;59740660;59740660;59740660;59740660;59740660;59740660;59740774;59750504;59750504;59750504;59750504;59750504;59750504;59750504;59756706;59756706;59756706;59762413;59767084;59768138;597…	59702687;59702687;59702687;59702687;59702687;59702687;59702687;59728118;59728118;59728118;59728118;59728118;59728118;59728118;59733157;59733157;59733157;59733157;59733157;59733157;59733157;59740295;59740822;59740758;59744896;59740822;59740822;59740822;59740822;59740822;59740822;59751705;59750547;59750547;59750547;59750547;59750547;59750547;59757174;59756717;59756717;59762656;59767089;59768252;597…	+;+;+;+;+;+;+;+;+;+;+;+;+;+;+;+;+;+;+;+;+;+;+;+;+;+;+;+;+;+;+;+;+;+;+;+;+;+;+;+;+;+;+;+;+;+;+;+;+;+;+;+;+;+;+;+;+;+;+;+;+;+;+;+;+;+;+;+;+;+;+;+;+;+;+;+;+;+;+;+;+;+	9234	4.48845	4.3634	4.89845	5.0242	4.31925	5.48119	4.53904	3.99121	4.16594	4.52722	3.68821	5.70864
Dnajb12	10;10;10;10;10;10;10;10;10;10;10;10;10;10;10;10;10;10;10;10;10;10;10;10;10;10;10;10;10;10;10;10;10;10;10;10;10;10;10;10;10;10;10	59879556;59879564;59879575;59879618;59879626;59890028;59890028;59890028;59890028;59890028;59890840;59890840;59890840;59890840;59892672;59892672;59892672;59892672;59892672;59892938;59892938;59892938;59892938;59892938;59894231;59894231;59894231;59894231;59894231;59895588;59895588;59895588;59895588;59895588;59896350;59896350;59896350;59896350;59896350;59897491;59897491;59897491;59897491	59879810;59879810;59879810;59879810;59879810;59890208;59890208;59890208;59890208;59890208;59890985;59890985;59890985;59890985;59892857;59892857;59892857;59892857;59892857;59893017;59893017;59893017;59893017;59893017;59894340;59894340;59894340;59894340;59894340;59895760;59895760;59895760;59895760;59895760;59896495;59896775;59896501;59896495;59896447;59898521;59899296;59898014;59899302	+;+;+;+;+;+;+;+;+;+;+;+;+;+;+;+;+;+;+;+;+;+;+;+;+;+;+;+;+;+;+;+;+;+;+;+;+;+;+;+;+;+;+	3369	16.4158	15.1523	16.066	17.8012	17.2047	17.1409	15.0578	14.7199	16.5282	14.7224	14.3771	15.9995
Ddit4	10;10;10	59949675;59951317;59951697	59951029;59951572;59951770	-;-;-	1685	13.2309	7.66034	11.185	8.08903	7.23249	6.92356	5.46095	6.05777	10.1221	7.82928	7.06665	7.5429
Anapc16	10;10;10;10;10;10;10;10;10;10;10;10;10;10;10;10;10;10;10;10;10;10;10;10;10	59987409;59987908;59988404;59988423;59988479;59988586;59990359;59990366;59990833;59990833;59990833;59990833;59990833;59990833;59995847;59996448;59996448;59996448;60002418;60002418;60002418;60002956;60002956;60002956;60002956	59988838;59988838;59988838;59988838;59988838;59988838;59990383;59990574;59991080;59990907;59990907;59990907;59990907;59990907;59998310;59996614;59996614;59996614;60002769;60002467;60002467;60003086;60002995;60003111;60003135	-;-;-;-;-;-;-;-;-;-;-;-;-;-;-;-;-;-;-;-;-;-;-;-;-	4890	5.32483	5.1509	5.73359	5.53258	5.03585	5.11096	6.50234	6.84405	5.15031	5.00148	5.63359	4.90845
Ascc1	10;10;10;10;10;10;10;10;10;10;10;10;10;10;10;10;10;10;10;10;10;10	60002805;60003327;60004795;60004795;60007727;60007727;60012462;60012462;60013596;60013596;60042121;60042121;60049752;60049752;60062460;60062460;60064323;60064323;60098093;60098093;60099706;60099706	60002907;60003416;60004927;60004927;60007826;60007826;60012559;60012559;60013774;60013774;60042257;60042257;60049871;60049871;60062584;60062584;60064408;60064408;60098214;60098214;60099990;60099990	+;+;+;+;+;+;+;+;+;+;+;+;+;+;+;+;+;+;+;+;+;+	1578	14.1553	14.1158	16.1572	13.5593	15.0629	14.9567	15.8451	18.0604	14.1755	16.1503	16.1468	15.0947
Spock2	10;10;10;10;10;10;10;10;10;10;10;10;10;10;10;10;10;10;10;10;10;10;10;10;10;10;10;10;10;10	60106219;60106219;60106468;60115073;60121232;60121232;60121478;60121478;60121478;60121684;60121684;60121684;60123810;60123810;60123810;60125710;60125710;60125710;60126154;60126154;60126154;60126834;60126834;60126834;60129681;60129681;60131084;60131084;60131336;60131336	60106656;60106656;60106656;60115081;60121240;60121240;60121523;60121523;60121523;60121798;60121798;60121798;60123924;60123924;60123924;60125824;60125824;60125824;60126270;60126270;60126270;60127338;60127052;60127052;60129743;60129743;60131221;60131221;60133908;60135198	+;+;+;+;+;+;+;+;+;+;+;+;+;+;+;+;+;+;+;+;+;+;+;+;+;+;+;+;+;+	5533	28.7029	16.7269	24.8465	26.8	13.4702	27.5399	28.2807	24.5784	25.8415	18.1377	18.2742	25.1192
Chst3	10;10;10;10;10;10;10;10;10	60181532;60181534;60185605;60188073;60188073;60188073;60194093;60194093;60218904	60186883;60186883;60186883;60188707;60188318;60188318;60194239;60194245;60219260	-;-;-;-;-;-;-;-;-	6497	3.29233	2.0557	1.74703	1.83665	1.868	1.62988	2.32095	2.28711	1.43116	2.18875	1.63859	2.53328
Psap	10;10;10;10;10;10;10;10;10;10;10;10;10;10;10;10;10;10;10;10;10;10;10;10;10;10;10;10;10;10;10;10;10;10;10;10;10;10;10;10;10;10;10;10;10;10;10;10;10;10;10;10;10;10;10;10;10;10;10;10;10;10;10;10;10;10;10;10;10;10;10;10	60277627;60277628;60277628;60277628;60284461;60291639;60291639;60291639;60291639;60291639;60292505;60292505;60292505;60292505;60292505;60293349;60293349;60293349;60293349;60293349;60294533;60294533;60294533;60294533;60294533;60294965;60294965;60294965;60294965;60294965;60295946;60295946;60295946;60295946;60295946;60297537;60299042;60299092;60299098;60299098;60299098;60299098;60299464;60299464;602…	60277782;60277782;60277782;60277782;60284531;60291772;60291772;60291772;60291772;60291772;60292579;60292579;60292579;60292579;60292579;60293474;60293474;60293474;60293474;60293474;60294730;60294730;60294730;60294730;60294730;60295108;60295108;60295108;60295108;60295108;60296002;60296002;60296006;60296002;60296002;60297545;60299046;60299229;60299229;60299229;60299229;60299229;60299559;60299559;602…	+;+;+;+;+;+;+;+;+;+;+;+;+;+;+;+;+;+;+;+;+;+;+;+;+;+;+;+;+;+;+;+;+;+;+;+;+;+;+;+;+;+;+;+;+;+;+;+;+;+;+;+;+;+;+;+;+;+;+;+;+;+;+;+;+;+;+;+;+;+;+;+	2744	156.015	180.041	210.249	188.154	179.008	179.774	117.755	108.749	248.102	154.705	152.523	168.796
Cdh23	10;10;10;10;10;10;10;10;10;10;10;10;10;10;10;10;10;10;10;10;10;10;10;10;10;10;10;10;10;10;10;10;10;10;10;10;10;10;10;10;10;10;10;10;10;10;10;10;10;10;10;10;10;10;10;10;10;10;10;10;10;10;10;10;10;10;10;10;10;10;10;10;10;10;10;10;10;10;10;10;10;10;10;10;10;10;10;10;10;10;10;10;10;10;10;10;10;10;10;10;10;10;10;10;10;10;10;10;10;10;10;10;10;10;10;10;10;10;10;10;10;10;10;10;10;10;10;10;10;10;10;10;10;…	60302748;60302748;60302750;60302750;60302750;60303274;60303274;60303299;60303299;60303352;60304416;60304424;60304424;60304424;60304424;60304424;60304661;60304825;60304825;60304825;60304825;60304825;60304825;60304825;60304825;60305058;60305058;60305058;60305058;60305058;60305058;60305058;60305058;60305058;60305058;60305576;60305576;60305578;60305578;60305578;60305578;60305578;60305578;60305578;603…	60303700;60303700;60303700;60303700;60303700;60303700;60303700;60303700;60303700;60303700;60304947;60304528;60304528;60304528;60304528;60304528;60304947;60304947;60304947;60304947;60304947;60304947;60304947;60304947;60304947;60305649;60305187;60305187;60305187;60305187;60305185;60305185;60305187;60305187;60305187;60305638;60305638;60305638;60305638;60305638;60305638;60305638;60305638;60305638;603…	-;-;-;-;-;-;-;-;-;-;-;-;-;-;-;-;-;-;-;-;-;-;-;-;-;-;-;-;-;-;-;-;-;-;-;-;-;-;-;-;-;-;-;-;-;-;-;-;-;-;-;-;-;-;-;-;-;-;-;-;-;-;-;-;-;-;-;-;-;-;-;-;-;-;-;-;-;-;-;-;-;-;-;-;-;-;-;-;-;-;-;-;-;-;-;-;-;-;-;-;-;-;-;-;-;-;-;-;-;-;-;-;-;-;-;-;-;-;-;-;-;-;-;-;-;-;-;-;-;-;-;-;-;-;-;-;-;-;-;-;-;-;-;-;-;-;-;-;-;-;-;-;-;-;-;-;-;-;-;-;-;-;-;-;-;-;-;-;-;-;-;-;-;-;-;-;-;-;-;-;-;-;-;-;-;-;-;-;-;-;-;-;-;-;-;-;-;-;-;-…	16939	0.0686018	0.0661466	0.17002	0.0759107	0.0386481	0.177477	0.147894	0.175979	0.134879	0.0404579	0.131059	0.107961
Vsir	10;10;10;10;10;10;10;10;10;10;10;10;10;10;10;10;10;10;10;10;10;10;10;10;10;10;10;10;10;10;10;10	60346851;60346851;60346905;60346907;60346984;60347012;60349323;60357809;60357842;60357842;60357842;60357842;60357842;60358045;60358944;60358944;60358944;60358944;60364201;60364201;60364201;60364201;60367766;60367766;60367766;60367766;60368529;60368532;60368532;60368902;60368902;60368902	60347103;60347103;60347103;60347103;60347103;60347103;60349413;60357998;60358267;60358267;60358135;60358267;60358267;60358216;60359038;60358994;60358994;60358994;60364308;60364308;60364308;60364308;60367768;60367793;60367793;60367793;60368725;60368725;60368725;60369293;60372684;60372684	+;+;+;+;+;+;+;+;+;+;+;+;+;+;+;+;+;+;+;+;+;+;+;+;+;+;+;+;+;+;+;+	5014	1.69099	1.70728	1.95122	1.99007	1.38601	1.72715	1.4893	1.34217	2.24655	1.81102	1.71067	2.6534
Slc29a3	10;10;10;10;10;10;10;10;10;10;10;10;10;10;10;10;10;10;10;10;10;10;10;10;10	60712072;60714026;60715229;60716030;60719153;60720861;60720861;60720861;60720861;60723764;60723764;60723764;60723764;60730570;60730570;60730570;60730570;60750386;60750386;60750386;60750386;60752734;60752734;60752734;60752734	60716490;60716490;60716490;60716490;60719385;60721023;60721023;60721023;60721023;60724316;60723990;60723990;60723990;60730652;60730675;60730652;60730652;60750684;60750684;60750684;60750684;60752794;60752783;60752782;60752782	-;-;-;-;-;-;-;-;-;-;-;-;-;-;-;-;-;-;-;-;-;-;-;-;-	5834	4.80258	4.74764	4.96555	5.90689	5.23956	5.7145	4.5088	3.84764	4.89071	4.20687	4.67013	3.99666
Unc5b	10;10;10;10;10;10;10;10;10;10;10;10;10;10;10;10;10	60762610;60766980;60768324;60769108;60772178;60772489;60773744;60774353;60774966;60777185;60777390;60778168;60778784;60779668;60780095;60783058;60831087	60765373;60767161;60768488;60769257;60772411;60772657;60773831;60774742;60775160;60777217;60777554;60778335;60778964;60779771;60780238;60783282;60831581	-;-;-;-;-;-;-;-;-;-;-;-;-;-;-;-;-	5852	0.691326	1.19475	0.926368	0.81739	1.04125	1.00444	0.86441	0.88756	0.699118	1.0247	0.827692	0.937498
Pcbd1	10;10;10;10	61089343;61092064;61092604;61093807	61089416;61092195;61092684;61094328	+;+;+;+	809	3.1388	2.71458	3.76931	2.67025	1.99193	2.93957	3.63259	4.1313	3.67793	2.54135	3.3678	3.05168
Sgpl1	10;10;10;10;10;10;10;10;10;10;10;10;10;10;10;10;10;10;10;10;10;10;10;10;10;10;10;10;10;10;10;10;10;10;10;10;10;10;10;10;10;10;10;10;10;10;10;10;10;10;10;10;10;10;10;10;10;10;10;10;10;10;10;10;10;10;10;10;10;10;10	61098642;61098642;61098645;61100825;61101681;61101681;61101681;61101681;61102568;61102568;61102568;61102568;61103121;61103121;61103121;61104195;61104463;61104463;61104463;61105422;61105422;61105422;61105422;61106265;61106265;61106265;61107577;61107577;61107577;61112162;61112162;61112162;61112180;61113438;61113438;61113438;61113438;61114010;61114010;61114010;61114010;61114094;61117452;61117695;611…	61101008;61101008;61101008;61101008;61101801;61102063;61101801;61101801;61103125;61102714;61102714;61102714;61103359;61103359;61103359;61104612;61104612;61104612;61104612;61105477;61105520;61105520;61105520;61106370;61106370;61106370;61107665;61107665;61107665;61112290;61112290;61112290;61112290;61113514;61113514;61113514;61113514;61114157;61114157;61114157;61114157;61114145;61117567;61117762;611…	-;-;-;-;-;-;-;-;-;-;-;-;-;-;-;-;-;-;-;-;-;-;-;-;-;-;-;-;-;-;-;-;-;-;-;-;-;-;-;-;-;-;-;-;-;-;-;-;-;-;-;-;-;-;-;-;-;-;-;-;-;-;-;-;-;-;-;-;-;-;-	6143	5.45779	5.58131	5.99124	5.73536	5.79577	6.66147	4.9094	3.91143	5.15502	5.37582	4.96909	4.98641
Tbata	10;10;10;10;10;10;10;10;10;10;10;10;10;10;10;10;10;10;10;10;10;10;10;10;10;10;10;10;10;10;10;10;10;10;10;10;10;10;10;10;10;10;10;10;10;10;10;10;10;10;10;10;10;10;10;10;10;10;10	61171954;61171964;61171986;61174301;61174301;61174301;61174370;61175262;61175262;61175262;61175345;61175393;61175731;61175731;61175731;61175731;61175731;61175731;61175731;61175731;61175731;61175942;61179245;61179245;61179245;61179245;61179298;61179347;61179347;61179347;61179347;61179347;61180248;61180248;61180315;61180315;61180315;61180315;61180315;61180315;61180315;61180315;61183300;61183300;611…	61172032;61172032;61172032;61174455;61174455;61174455;61174455;61175403;61175403;61175403;61175403;61175403;61175978;61175978;61175978;61175978;61175978;61175978;61175978;61175978;61175978;61175978;61179505;61179505;61179505;61179505;61179505;61179505;61179505;61179505;61179505;61179505;61180680;61180680;61180680;61180680;61180442;61180394;61180394;61180683;61180394;61180394;61183343;61183491;611…	+;+;+;+;+;+;+;+;+;+;+;+;+;+;+;+;+;+;+;+;+;+;+;+;+;+;+;+;+;+;+;+;+;+;+;+;+;+;+;+;+;+;+;+;+;+;+;+;+;+;+;+;+;+;+;+;+;+;+	2426	0.727365	0.184742	0.541189	0.339219	0.435914	0.425396	0.218442	0.167554	0.503734	0.282488	0.603127	0.376906
Adamts14	10;10;10;10;10;10;10;10;10;10;10;10;10;10;10;10;10;10;10;10;10;10;10;10;10;10;10;10;10;10;10;10;10;10;10;10;10;10;10;10;10;10;10;10	61197112;61198468;61200363;61200363;61201176;61201176;61202823;61202823;61204847;61204847;61205364;61205364;61207300;61207300;61211588;61211588;61213124;61213124;61213530;61213530;61218358;61218358;61221858;61221858;61222784;61222784;61224273;61224273;61225337;61225337;61227107;61227107;61229647;61229656;61230418;61230418;61245926;61245926;61249604;61249604;61270857;61270857;61273156;61273156	61198959;61198959;61200473;61200473;61201305;61201305;61203030;61203030;61204979;61204979;61205532;61205532;61207463;61207463;61211668;61211668;61213247;61213247;61213663;61213663;61218533;61218533;61222006;61222006;61222897;61222897;61224405;61224405;61225480;61225480;61227212;61227212;61229803;61229803;61230501;61230501;61246116;61246116;61249760;61249760;61271257;61271257;61273242;61273438	-;-;-;-;-;-;-;-;-;-;-;-;-;-;-;-;-;-;-;-;-;-;-;-;-;-;-;-;-;-;-;-;-;-;-;-;-;-;-;-;-;-;-;-	5197	1.06831	1.50918	1.31205	1.45484	1.07558	1.00152	0.639634	0.677869	1.54379	1.0467	0.796091	1.00287
Prf1	10;10;10	61297836;61299911;61302801	61297854;61300482;61304263	+;+;+	2054	0.0209536	0.06546	0.0824778	0	0.0980691	0.0436903	0.0234549	0.0879556	0.0517361	0.0834124	0.0245641	0.311617
Pald1	10;10;10;10;10;10;10;10;10;10;10;10;10;10;10;10;10;10;10;10	61319657;61323224;61339199;61340931;61341212;61342319;61342794;61343041;61343628;61344104;61346761;61347038;61347423;61348308;61348534;61350141;61350896;61352933;61355814;61383292	61321242;61323379;61339339;61341002;61341352;61342501;61342949;61343157;61343756;61344199;61346865;61347137;61347574;61348383;61348694;61350305;61351075;61353035;61356036;61383523	-;-;-;-;-;-;-;-;-;-;-;-;-;-;-;-;-;-;-;-	4274	8.46878	7.16212	8.57155	7.56949	8.18885	8.81862	9.13031	8.7921	8.5157	8.49831	8.66489	9.70211
Nodal	10;10;10	61417972;61422982;61424484	61418495;61423697;61425338	+;+;+	2095	0	0.021393	0	0	0	0	0	0	0	0.020445	0	0
Eif4ebp2	10;10;10;10;10;10;10	61432497;61432820;61434918;61434918;61452402;61452402;61452614	61433828;61433828;61435103;61435103;61452583;61452669;61452658	-;-;-;-;-;-;-	1786	4.4581	4.81809	5.47783	4.72295	5.07532	5.72808	5.12515	3.81856	2.97497	4.89238	3.44651	5.58044
D830039M14Rik	10	61475245	61476937	-	1693	0.0254216	0	0.175113	0	0.0594902	0.0795097	0.0284563	0.0533552	0.15692	0.0252996	0	0.108018
Lrrc20	10;10;10;10;10	61475833;61482336;61527060;61548048;61580130	61475889;61482482;61527209;61548215;61582226	+;+;+;+;+	2619	1.39683	1.24923	2.53888	1.64966	2.96113	2.27862	1.32444	1.22441	2.73881	1.73357	2.00355	1.53618
Npffr1	10;10;10;10	61595492;61613956;61623292;61625509	61595498;61614270;61623391;61628565	+;+;+;+	3479	0	0	0	0	0	0	0.0138478	0	0	0	0	0
Ppa1	10;10;10;10;10;10;10;10;10;10;10;10;10;10;10;10;10;10	61648552;61648621;61651560;61651560;61659449;61660912;61662688;61663689;61663690;61663690;61665340;61665340;61665340;61666911;61667585;61670418;61672391;61673819	61648791;61648791;61652820;61651618;61659502;61661031;61662883;61663776;61663776;61663776;61665605;61665425;61665466;61667038;61667670;61670487;61672433;61674168	+;+;+;+;+;+;+;+;+;+;+;+;+;+;+;+;+;+	2902	21.4897	25.5443	24.6642	17.4932	21.8128	22.5896	21.6977	24.9016	23.3075	23.4234	25.436	23.7888
Sar1a	10;10;10;10;10;10;10	61680310;61684880;61685066;61685554;61686375;61689774;61691285	61680413;61684953;61685185;61685619;61686478;61689905;61693295	+;+;+;+;+;+;+	2611	20.1265	21.4565	19.3027	19.1474	17.9755	19.8315	18.1377	20.4809	20.3293	20.8994	20.3094	16.8622
Tysnd1	10;10;10;10	61695514;61698298;61699443;61702034	61696742;61698428;61699628;61702773	+;+;+;+	2286	5.00801	5.03863	5.29868	5.2649	4.73625	6.12399	5.26864	5.09739	5.4853	4.5343	5.38537	5.57984
Aifm2	10;10;10;10;10;10;10;10;10;10;10;10;10;10;10;10;10;10;10;10;10;10;10;10;10;10;10;10;10;10;10;10;10;10;10;10;10;10;10;10;10;10;10;10;10;10;10	61715263;61715287;61715311;61715323;61715332;61715879;61720649;61725856;61725856;61725856;61725856;61725856;61726365;61726365;61726365;61726365;61726365;61727647;61727647;61727647;61727647;61727647;61728129;61728129;61728129;61728129;61728148;61732323;61732323;61732323;61732323;61732323;61734277;61734277;61734277;61734277;61734277;61735458;61735458;61735458;61735458;61736583;61736583;61736583;617…	61715352;61715352;61715352;61715352;61715352;61716235;61720731;61726054;61726054;61726054;61726054;61726054;61726480;61726480;61726480;61726480;61726480;61727921;61727766;61727766;61727766;61727766;61728221;61728221;61728221;61728221;61728221;61732431;61732431;61732431;61732431;61732431;61734570;61734429;61734429;61734429;61734429;61735658;61735658;61735658;61735658;61738647;61736758;61736758;617…	+;+;+;+;+;+;+;+;+;+;+;+;+;+;+;+;+;+;+;+;+;+;+;+;+;+;+;+;+;+;+;+;+;+;+;+;+;+;+;+;+;+;+;+;+;+;+	4121	7.7806	8.15669	11.9113	8.77412	10.6803	13.0004	7.856	7.49648	13.5895	7.59777	9.70895	7.4774
H2afy2	10;10;10;10;10;10;10;10;10	61738665;61741135;61746633;61747672;61749276;61751677;61753462;61757724;61783783	61739462;61741309;61746722;61747771;61749386;61751874;61753568;61757954;61784147	-;-;-;-;-;-;-;-;-	2175	28.3957	25.9431	30.26	26.5565	27.2283	26.7982	29.4818	28.3451	28.8262	28.4564	25.9581	27.8936
Col13a1	10;10;10;10;10;10;10;10;10;10;10;10;10;10;10;10;10;10;10;10;10;10;10;10;10;10;10;10;10;10;10;10;10;10;10;10;10;10;10;10;10;10;10;10;10;10;10;10;10;10;10;10;10;10;10;10;10;10;10;10;10;10;10;10;10;10;10;10;10;10;10;10;10;10;10;10;10;10;10;10;10;10;10;10;10;10;10;10;10;10;10;10;10;10;10;10;10;10;10;10;10;10;10;10;10;10;10;10;10;10;10;10;10;10;10;10;10;10;10;10;10;10;10;10;10;10;10;10;10;10;10;10;10;…	61838236;61838236;61838236;61838236;61838236;61840078;61840078;61840078;61840078;61840078;61843568;61843568;61843568;61843568;61843568;61848732;61848861;61849176;61849176;61849176;61849176;61849176;61850157;61850157;61850157;61850157;61850157;61850157;61850157;61851112;61851112;61851112;61851112;61851112;61851112;61851112;61853357;61853357;61853357;61856338;61856338;61856338;61856338;61856338;618…	61838708;61838708;61838708;61838708;61838708;61840116;61840116;61840116;61840116;61840116;61843654;61843654;61843654;61843654;61843654;61849211;61849211;61849211;61849211;61849211;61849211;61849211;61850210;61850210;61850210;61850210;61850210;61850210;61850210;61851525;61851165;61851165;61851165;61851165;61851165;61851165;61853392;61853392;61853392;61856418;61856418;61856418;61856418;61856418;618…	-;-;-;-;-;-;-;-;-;-;-;-;-;-;-;-;-;-;-;-;-;-;-;-;-;-;-;-;-;-;-;-;-;-;-;-;-;-;-;-;-;-;-;-;-;-;-;-;-;-;-;-;-;-;-;-;-;-;-;-;-;-;-;-;-;-;-;-;-;-;-;-;-;-;-;-;-;-;-;-;-;-;-;-;-;-;-;-;-;-;-;-;-;-;-;-;-;-;-;-;-;-;-;-;-;-;-;-;-;-;-;-;-;-;-;-;-;-;-;-;-;-;-;-;-;-;-;-;-;-;-;-;-;-;-;-;-;-;-;-;-;-;-;-;-;-;-;-;-;-;-;-;-;-;-;-;-;-;-;-;-;-;-;-;-;-;-;-;-;-;-;-;-;-;-;-;-;-;-;-;-;-;-;-;-;-;-;-;-;-;-;-;-;-;-	4605	2.48606	3.38692	2.74072	2.08864	3.47752	2.55286	4.08009	4.66854	3.59989	3.59028	4.07582	3.39539
Gm5424	10	62071015	62072609	+	1595	0.37777	0.140496	0.0796596	0.451459	0.0947181	0.140658	0.332251	0.198217	0.133249	0.107416	0.031633	0.601939
2010107G23Rik	10;10;10;10;10;10;10;10;10;10;10;10;10;10;10;10;10;10;10;10;10;10;10;10;10;10;10;10;10;10;10;10;10;10;10;10;10;10	62107655;62108210;62108210;62108210;62108212;62108835;62108917;62108918;62108920;62109884;62109884;62109884;62109884;62109884;62109884;62109884;62109884;62109947;62110236;62110236;62110236;62110236;62110598;62110706;62110957;62110959;62110959;62134489;62134489;62134489;62134489;62134521;62139662;62142266;62142266;62143870;62143870;62143870	62109123;62109123;62109123;62109123;62109123;62109123;62109123;62109123;62109123;62110012;62110012;62110031;62110012;62110010;62110012;62110012;62110012;62110012;62110496;62110314;62110314;62110314;62110968;62110945;62111013;62111050;62111050;62134761;62134761;62134761;62134706;62134761;62139870;62142349;62142382;62143910;62143920;62143906	-;-;-;-;-;-;-;-;-;-;-;-;-;-;-;-;-;-;-;-;-;-;-;-;-;-;-;-;-;-;-;-;-;-;-;-;-;-	2981	2.88754	2.67617	3.04039	2.65711	2.06096	2.90503	3.19991	3.28777	2.69141	2.01158	2.04798	2.68392
Neurog3	10;10	62133090;62133462	62133327;62134763	+;+	1540	3.35367	3.23041	3.10767	3.44007	1.63502	3.00104	3.78529	3.51937	2.44964	1.80786	1.90024	2.93906
Tspan15	10;10;10;10;10;10;10;10	62185396;62188643;62189814;62191468;62193867;62201778;62203080;62231020	62188162;62188759;62189861;62191584;62193962;62201852;62203265;62231218	-;-;-;-;-;-;-;-	3605	2.20865	2.87185	5.29845	2.76788	6.53752	6.0366	3.07367	3.01937	6.01339	4.36046	4.80055	2.59981
Tacr2	10;10;10;10;10	62252438;62258158;62261172;62261484;62265051	62253209;62258352;62261325;62261680;62265990	+;+;+;+;+	2258	0.114363	0.0396973	0.281349	0.182229	0.133813	0.238459	0.320038	0.200023	0.305903	0.227629	0.335173	0.242969
Hk1	10;10;10;10;10;10;10;10;10;10;10;10;10;10;10;10;10;10;10;10;10;10;10;10;10;10;10;10;10;10;10;10;10;10;10;10;10;10;10;10;10;10;10;10;10;10;10;10;10;10;10;10;10;10;10;10;10;10;10;10;10;10;10;10;10;10;10;10;10;10;10;10;10;10;10;10;10;10;10;10;10;10;10;10;10;10;10;10;10;10;10;10;10;10;10;10;10;10;10;10;10;10;10;10;10;10;10;10;10;10;10;10;10;10;10;10;10;10;10;10;10;10;10;10;10;10;10;10;10;10;10;10;10;…	62268855;62269104;62269108;62269909;62271589;62271589;62271589;62271589;62274447;62274447;62274447;62274447;62275681;62275681;62275681;62275681;62281033;62281033;62281033;62281033;62281811;62281811;62281811;62281811;62284279;62284279;62284279;62284279;62284609;62284701;62284701;62284701;62284701;62286348;62286348;62286348;62286348;62286348;62290160;62290160;62290160;62290160;62290160;62291975;622…	62270056;62270056;62270056;62270056;62271822;62271822;62271822;62271822;62274602;62274602;62274602;62274602;62275864;62275864;62275864;62275864;62281132;62281132;62281132;62281132;62281906;62281906;62281906;62281906;62284398;62284398;62284398;62284398;62284849;62284849;62284849;62284849;62284849;62286652;62286652;62286652;62286652;62286652;62290329;62290393;62290393;62290393;62290393;62292043;622…	-;-;-;-;-;-;-;-;-;-;-;-;-;-;-;-;-;-;-;-;-;-;-;-;-;-;-;-;-;-;-;-;-;-;-;-;-;-;-;-;-;-;-;-;-;-;-;-;-;-;-;-;-;-;-;-;-;-;-;-;-;-;-;-;-;-;-;-;-;-;-;-;-;-;-;-;-;-;-;-;-;-;-;-;-;-;-;-;-;-;-;-;-;-;-;-;-;-;-;-;-;-;-;-;-;-;-;-;-;-;-;-;-;-;-;-;-;-;-;-;-;-;-;-;-;-;-;-;-;-;-;-;-;-;-;-;-;-;-;-;-;-;-;-;-;-;-;-;-;-;-;-;-;-	8532	6.22478	6.0199	7.79339	6.86028	6.99423	7.5204	5.91195	4.78544	6.7942	6.3907	5.0916	6.24265
Hkdc1	10;10;10;10;10;10;10;10;10;10;10;10;10;10;10;10;10;10;10;10;10;10;10;10;10;10	62383137;62385678;62391311;62393687;62395155;62395159;62395398;62398585;62398585;62398790;62398790;62400192;62400192;62401724;62403492;62405425;62408615;62409789;62409790;62411507;62411507;62411706;62416383;62417775;62422298;62422298	62383922;62385911;62391466;62393870;62395254;62395493;62395493;62398704;62398704;62398929;62398929;62400361;62400496;62401957;62403647;62405608;62408714;62409885;62409885;62411804;62411626;62411854;62417937;62417937;62422408;62422491	-;-;-;-;-;-;-;-;-;-;-;-;-;-;-;-;-;-;-;-;-;-;-;-;-;-	5132	0.0167727	0	0	0.0200444	0	0	0.00938746	0.0264021	0.0207065	0.0333845	0	0.00890855
Supv3l1	10;10;10;10;10;10;10;10;10;10;10;10;10;10;10;10;10;10;10;10;10;10;10;10;10;10;10;10;10;10;10;10;10;10;10;10	62429209;62429255;62429340;62429443;62430471;62430471;62430471;62430471;62432289;62432289;62432359;62433052;62433052;62433052;62434395;62434395;62435459;62435459;62435646;62435646;62437434;62437434;62438974;62438974;62441135;62441135;62443379;62443395;62445039;62445039;62447024;62447024;62447696;62447696;62449415;62449415	62429834;62429834;62429808;62429834;62430621;62430968;62430619;62430619;62432465;62432465;62432399;62433127;62433132;62433132;62434614;62434614;62435552;62435552;62435826;62435826;62437525;62437525;62439051;62439051;62441246;62441246;62443563;62443563;62445153;62445153;62447131;62447131;62447773;62447773;62449683;62449738	-;-;-;-;-;-;-;-;-;-;-;-;-;-;-;-;-;-;-;-;-;-;-;-;-;-;-;-;-;-;-;-;-;-;-;-	2969	9.92979	10.0686	10.342	10.5155	10.3295	10.1558	12.2835	12.4284	10.2723	10.7189	10.7741	11.5182
4930507D05Rik	10	62449489	62451322	+	1834	0.727482	0.757561	0.669694	0.925476	0.933581	0.978626	0.840592	0.714172	0.840162	0.957537	0.852833	0.822637
Vps26a	10;10;10;10;10;10;10;10;10;10;10;10;10;10;10;10;10;10	62454843;62454843;62458924;62458924;62463691;62463691;62464632;62464632;62468290;62468290;62469901;62469901;62471060;62471060;62480558;62480558;62486378;62486658	62456858;62456858;62459066;62459066;62463759;62463759;62464738;62464738;62468454;62468454;62470057;62470057;62471135;62471135;62480707;62480707;62486598;62486805	-;-;-;-;-;-;-;-;-;-;-;-;-;-;-;-;-;-	3252	22.9222	26.2129	27.8182	22.6329	23.4294	28.2576	24.1919	27.138	26.5011	22.6806	25.429	22.2267
Srgn	10;10;10;10;10;10;10;10;10;10;10;10;10;10;10;10;10;10;10;10;10	62493833;62494428;62494684;62497779;62497779;62497779;62497915;62507642;62507642;62507642;62507642;62507676;62507742;62507913;62507913;62513090;62518052;62518052;62527339;62527339;62527339	62495106;62495106;62495106;62497923;62497923;62497923;62497923;62507836;62507741;62507755;62507836;62507836;62507836;62508097;62507938;62513280;62518144;62518144;62527425;62527425;62527451	-;-;-;-;-;-;-;-;-;-;-;-;-;-;-;-;-;-;-;-;-	2196	2.76342	3.04095	3.14364	3.25562	2.24733	3.10575	3.04942	3.08506	3.38735	3.25728	3.14768	3.91398
Kif1bp	10;10;10;10;10;10;10;10;10;10;10;10;10;10;10;10;10;10;10;10;10;10;10;10;10;10;10;10;10;10;10;10;10;10;10;10;10;10;10;10;10	62538626;62539655;62558470;62558474;62558543;62559548;62559599;62559734;62563236;62563236;62563236;62563236;62563236;62563236;62565871;62566037;62566037;62566037;62566037;62566037;62566037;62568172;62569459;62569459;62569459;62569459;62569459;62570050;62570399;62570399;62570399;62570399;62570399;62575050;62575050;62575050;62575050;62577964;62577964;62577964;62577964	62540056;62540056;62559883;62559883;62559883;62559883;62559883;62559883;62563351;62563578;62563508;62563351;62563351;62563351;62566121;62566121;62566121;62566121;62566121;62566121;62566121;62568418;62569642;62569642;62569642;62569642;62569642;62570478;62570403;62570478;62570478;62570415;62570478;62575148;62575148;62575148;62575148;62578394;62578416;62578457;62578440	-;-;-;-;-;-;-;-;-;-;-;-;-;-;-;-;-;-;-;-;-;-;-;-;-;-;-;-;-;-;-;-;-;-;-;-;-;-;-;-;-	4892	10.0383	10.206	10.1725	10.3457	9.97493	10.924	10.1041	9.76795	9.65561	10.2703	9.31329	10.4297
Ddx21	10;10;10;10;10;10;10;10;10;10;10;10;10;10;10	62580248;62583054;62584631;62585525;62587464;62588004;62588657;62589778;62590621;62591817;62593010;62593962;62595036;62598232;62602128	62582607;62583098;62584765;62585684;62587537;62588123;62588818;62589927;62590766;62592002;62593127;62594140;62595111;62598891;62602298	-;-;-;-;-;-;-;-;-;-;-;-;-;-;-	4742	41.632	45.8674	46.8806	44.7635	46.4292	48.0777	42.9646	44.4699	38.8133	46.906	38.3145	52.3133
Ddx50	10;10;10;10;10;10;10;10;10;10;10;10;10;10;10	62616023;62619585;62621389;62624768;62625145;62626163;62627521;62633977;62639861;62640447;62640745;62642776;62643297;62646914;62651025	62616516;62619629;62621523;62624927;62625218;62626282;62627682;62634126;62640006;62640632;62640862;62642954;62643372;62647201;62651218	-;-;-;-;-;-;-;-;-;-;-;-;-;-;-	2527	29.124	31.4987	29.1623	26.2767	26.086	31.3575	33.4013	33.1366	28.6165	29.1029	31.2472	29.9243
Stox1	10;10;10;10;10;10;10;10;10;10;10;10	62659043;62659043;62663955;62666126;62666176;62667821;62667821;62667821;62724263;62725768;62725768;62725768	62659667;62659667;62666325;62666325;62666325;62667973;62667973;62667973;62724432;62725801;62726128;62725801	-;-;-;-;-;-;-;-;-;-;-;-	3680	0.502898	0.535871	0.736563	0.489182	0.4379	0.548682	0.720029	0.613658	0.664162	0.826384	0.726657	0.59633
Ccar1	10;10;10;10;10;10;10;10;10;10;10;10;10;10;10;10;10;10;10;10;10;10;10;10;10	62743928;62745263;62746901;62747344;62750547;62750937;62751743;62753174;62756483;62760094;62763440;62764324;62765267;62765942;62766557;62770855;62771936;62776568;62776849;62780441;62783234;62783883;62785431;62790921;62792216	62744822;62745468;62747086;62747464;62750693;62751016;62751854;62753413;62756674;62760279;62763523;62764534;62765433;62766055;62766782;62771016;62772065;62776760;62776963;62780634;62783266;62783927;62785594;62791042;62792368	-;-;-;-;-;-;-;-;-;-;-;-;-;-;-;-;-;-;-;-;-;-;-;-;-	4478	138.304	137.898	132.136	126.724	127.864	120.953	133.922	152.047	131.515	125.924	139.883	125.384
Tet1	10;10;10;10;10;10;10;10;10;10;10;10;10;10;10;10;10;10;10;10;10;10;10;10;10;10;10;10;10;10;10;10;10;10;10	62804570;62804577;62812622;62813126;62813348;62813524;62813578;62813578;62813578;62814436;62814436;62814436;62814436;62814436;62816384;62816384;62818939;62819473;62819473;62822549;62822549;62832894;62832894;62833538;62833538;62838176;62838176;62839097;62864808;62864808;62864808;62865136;62878152;62878152;62898944	62813412;62813412;62813412;62813412;62813824;62813824;62813802;62813824;62813824;62814539;62814541;62814540;62814573;62814573;62816473;62816473;62819034;62819623;62819623;62822760;62822760;62832987;62832987;62833628;62833628;62840378;62840378;62840378;62864861;62864861;62864861;62865304;62880133;62880014;62899118	-;-;-;-;-;-;-;-;-;-;-;-;-;-;-;-;-;-;-;-;-;-;-;-;-;-;-;-;-;-;-;-;-;-;-	14710	1.05329	0.990207	1.05953	1.11539	1.0236	1.16827	1.0775	1.05314	0.776587	1.09774	1.08387	1.28671
Slc25a16	10;10;10;10;10;10;10;10;10;10;10;10;10;10;10;10;10;10;10;10;10;10	62920633;62920667;62920680;62928296;62928296;62928296;62930303;62930303;62932719;62932719;62937418;62937418;62937928;62937928;62941042;62941042;62942442;62942651;62942651;62944315;62944315;62944315	62920881;62920881;62920881;62929824;62928388;62928388;62930436;62930436;62932791;62932782;62937539;62937539;62937994;62937994;62941204;62941204;62942719;62942719;62942719;62944434;62944429;62946498	+;+;+;+;+;+;+;+;+;+;+;+;+;+;+;+;+;+;+;+;+;+	4799	0.9327	0.943248	1.16493	1.0289	1.47959	1.35573	0.903497	0.809379	1.02967	1.20491	0.904169	0.86693
Dna2	10;10;10;10;10;10;10;10;10;10;10;10;10;10;10;10;10;10;10;10;10;10;10;10;10;10;10;10;10;10;10;10;10;10;10;10;10;10;10;10;10;10;10;10;10;10;10;10;10;10;10;10;10;10;10;10;10;10;10;10;10;10;10;10;10;10;10;10;10;10;10	62947026;62947075;62947080;62947110;62949183;62949183;62949183;62949183;62950735;62950735;62950735;62954184;62954184;62954184;62955314;62955314;62955314;62956930;62956930;62956930;62958053;62958053;62958053;62958896;62958896;62958896;62959175;62959175;62959175;62960212;62960212;62960212;62961421;62961421;62961421;62961614;62961614;62961614;62962396;62962396;62962396;62963805;62963805;62963805;629…	62947169;62947169;62947169;62947169;62949695;62949365;62949365;62949365;62950918;62950918;62950918;62954329;62954329;62954329;62955445;62955445;62955445;62957149;62957149;62957149;62958170;62958170;62958170;62959058;62959058;62959058;62959369;62959369;62959369;62960442;62960442;62960442;62961537;62961537;62961537;62961723;62961723;62961723;62962505;62962505;62962505;62964029;62964029;62964029;629…	+;+;+;+;+;+;+;+;+;+;+;+;+;+;+;+;+;+;+;+;+;+;+;+;+;+;+;+;+;+;+;+;+;+;+;+;+;+;+;+;+;+;+;+;+;+;+;+;+;+;+;+;+;+;+;+;+;+;+;+;+;+;+;+;+;+;+;+;+;+;+	5878	1.58888	1.35721	1.5203	0.98878	1.28509	1.49618	1.49168	1.57517	1.48244	1.36265	1.76823	2.12337
Rufy2	10;10;10;10;10;10;10;10;10;10;10;10;10;10;10;10;10;10;10;10;10;10;10;10;10;10;10;10;10;10;10;10;10;10;10;10;10;10;10;10;10;10;10;10;10;10;10;10;10;10;10;10;10;10;10;10;10;10;10;10;10;10;10;10;10;10;10;10;10;10;10;10;10;10;10;10;10;10;10;10;10;10;10	62980223;62980239;62980242;62980252;62980262;62980293;62981428;62982671;62982671;62982671;62982671;62982671;62982671;62982671;62989123;62989123;62989123;62989123;62989123;62989123;62989123;62990980;62990980;62990980;62990980;62993117;62993117;62993117;62993117;62993117;62993980;62993980;62993980;62993980;62993980;62994705;62994705;62994705;62994705;62994705;62995310;62995310;62995310;62995310;629…	62980332;62980332;62980332;62980332;62980332;62980332;62981488;62982844;62982844;62982844;62982844;62982844;62982844;62982844;62989170;62990293;62989240;62989240;62989240;62989240;62989240;62991081;62991081;62991081;62991081;62993240;62993240;62993240;62993240;62993240;62994041;62994041;62994041;62994041;62994041;62994770;62994770;62994770;62994770;62994770;62995379;62995379;62995379;62995379;629…	+;+;+;+;+;+;+;+;+;+;+;+;+;+;+;+;+;+;+;+;+;+;+;+;+;+;+;+;+;+;+;+;+;+;+;+;+;+;+;+;+;+;+;+;+;+;+;+;+;+;+;+;+;+;+;+;+;+;+;+;+;+;+;+;+;+;+;+;+;+;+;+;+;+;+;+;+;+;+;+;+;+;+	8108	11.3383	11.0387	11.3298	11.0633	10.54	11.8484	11.8956	12.8232	11.1207	11.0039	12.1345	11.4973
Hnrnph3	10;10;10;10;10;10;10;10;10;10;10;10;10;10;10;10;10;10;10;10;10;10;10;10;10;10;10;10;10;10;10;10;10;10;10;10;10	63014664;63014664;63015428;63015431;63015802;63015802;63015802;63015802;63016080;63016080;63016080;63016407;63016407;63016407;63016418;63017222;63017222;63017222;63017222;63017524;63017524;63017524;63017524;63017807;63018041;63018041;63018086;63018760;63018760;63019393;63019393;63019393;63019393;63023720;63023720;63023720;63023720	63015714;63015714;63015714;63015714;63016168;63015894;63015894;63015894;63016175;63016175;63016175;63016542;63016542;63016542;63016542;63017337;63017337;63017337;63017337;63018084;63017610;63017610;63017610;63018225;63018225;63018225;63018225;63018898;63018898;63019527;63019527;63019527;63019527;63024217;63023847;63023894;63023894	-;-;-;-;-;-;-;-;-;-;-;-;-;-;-;-;-;-;-;-;-;-;-;-;-;-;-;-;-;-;-;-;-;-;-;-;-	3151	100.788	102.096	100.901	89.3199	91.7352	98.3551	105.511	118.381	99.403	100.468	114.984	108.732
Pbld2	10;10;10;10;10;10;10;10;10;10;10;10;10;10;10;10;10;10;10;10;10;10;10;10;10;10;10;10;10;10;10;10;10;10;10;10	63024315;63024512;63039089;63039089;63047468;63047468;63047942;63047942;63052201;63052201;63052429;63053864;63054210;63054327;63056779;63056779;63057641;63057641;63061582;63061618;63065784;63065784;63066525;63066525;63067429;63067431;63067658;63067658;63071407;63071407;63071869;63071869;63075061;63075061;63076349;63076349	63024465;63024736;63039232;63039232;63047567;63047567;63048040;63048040;63052310;63052261;63052458;63053952;63054505;63054505;63056841;63056841;63058128;63058813;63061701;63061701;63065883;63065883;63066623;63066628;63067538;63067538;63067687;63067687;63071495;63071495;63072047;63072047;63075123;63075123;63077534;63077962	+;+;+;+;+;+;+;+;+;+;+;+;+;+;+;+;+;+;+;+;+;+;+;+;+;+;+;+;+;+;+;+;+;+;+;+	4889	0.589813	0.559198	0.450465	0.547059	0.56652	0.559842	0.719346	0.628193	0.575997	0.770964	0.722403	0.56108
Atoh7	10	63100156	63100605	+	450	0	0	0	0	0	0	0.107059	0	0	0	0	0.101597
Mypn	10;10;10;10;10;10;10;10;10;10;10;10;10;10;10;10;10;10;10;10	63115795;63118421;63120029;63121902;63123271;63125669;63127628;63130983;63134933;63135708;63145836;63147877;63150023;63152795;63162222;63163513;63167233;63169255;63192387;63203718	63117026;63118554;63120194;63122109;63123397;63125748;63127777;63131204;63135071;63136295;63146208;63147993;63150046;63152936;63162293;63163624;63167284;63169430;63193283;63203952	-;-;-;-;-;-;-;-;-;-;-;-;-;-;-;-;-;-;-;-	5246	0.0164082	0.02563	0.0322931	0.0490222	0.00959941	0.0256595	0.0275504	0.0860946	0.0506414	0.00816475	0.0577065	0.0348598
Herc4	10;10;10;10;10;10;10;10;10;10;10;10;10;10;10;10;10;10;10;10;10;10;10;10;10	63243797;63245418;63245822;63264026;63269628;63273451;63274997;63278335;63283181;63285652;63286017;63287519;63287898;63289052;63290504;63299120;63306348;63307742;63308307;63311467;63311848;63314487;63315660;63316700;63317280	63244163;63245448;63246125;63264185;63269704;63273672;63275088;63278465;63283341;63285728;63286141;63287578;63288009;63289241;63290676;63299239;63306446;63307909;63308450;63311633;63311914;63314569;63315843;63316802;63317881	+;+;+;+;+;+;+;+;+;+;+;+;+;+;+;+;+;+;+;+;+;+;+;+;+	4019	14.0821	14.2294	13.4044	12.2474	10.613	12.761	14.7682	16.5647	12.4404	12.1282	14.7384	12.4336
Sirt1	10;10;10;10;10;10;10;10;10;10;10;10;10;10;10;10;10;10;10;10;10;10;10;10;10;10;10;10;10;10;10;10;10;10;10;10;10;10;10;10;10;10;10;10;10;10;10;10;10;10;10;10;10;10	63319005;63319007;63319007;63319007;63319058;63321749;63321749;63321749;63321749;63322147;63323967;63323967;63323967;63323967;63323967;63323967;63325126;63325126;63325126;63325126;63325126;63325126;63326039;63326039;63326039;63326039;63326039;63326660;63331390;63331745;63331745;63331745;63331745;63331745;63335636;63335636;63335636;63335636;63335636;63335636;63336980;63336980;63336980;63336980;633…	63320964;63320964;63320964;63320964;63320964;63322300;63322300;63322300;63322300;63322300;63324153;63324153;63324153;63324153;63324153;63324153;63325205;63325626;63325205;63325205;63325205;63325205;63326186;63326186;63326186;63326186;63326186;63326784;63331897;63331897;63331897;63331897;63331897;63331897;63335877;63335877;63335877;63335877;63335877;63335877;63336992;63337096;63337096;63336992;633…	-;-;-;-;-;-;-;-;-;-;-;-;-;-;-;-;-;-;-;-;-;-;-;-;-;-;-;-;-;-;-;-;-;-;-;-;-;-;-;-;-;-;-;-;-;-;-;-;-;-;-;-;-;-	5331	4.19811	4.08586	3.76571	3.5505	3.0984	3.60239	4.34682	4.53262	3.21928	4.01728	4.26844	3.99642
Dnajc12	10;10;10;10;10;10;10;10;10;10;10;10;10;10	63382443;63386563;63386571;63395785;63395785;63395785;63397239;63397239;63407002;63407002;63407002;63408189;63408189;63408189	63382518;63386775;63386775;63395863;63397378;63395863;63397378;63397378;63407206;63407206;63407206;63408827;63408280;63408840	+;+;+;+;+;+;+;+;+;+;+;+;+;+	2740	1.52363	1.53756	1.96305	1.57681	1.15788	1.88323	1.37145	1.73078	2.19125	1.23495	1.62044	1.56845
Gm7075	10	63421401	63421739	-	339	0.380874	0.132207	0.124933	0.151723	0.14855	0.13236	0	0	0.156734	0.126349	0.148834	0
Ctnna3	10;10;10;10;10;10;10;10;10;10;10;10;10;10;10;10;10;10;10;10;10;10;10;10;10;10;10;10;10;10;10;10;10;10;10;10;10;10;10;10;10;10;10;10;10;10;10;10;10;10;10;10;10;10;10;10;10;10;10	63430098;63457510;63504032;63504032;63504037;63537521;63537521;63537521;63566804;63566804;63566804;63574506;63581944;63581944;63581944;63581944;63583189;63820222;63820222;63820222;63821055;63852622;63852622;63852622;63852622;64076861;64250698;64250698;64250698;64260813;64260813;64260813;64409191;64409191;64409191;64487462;64487462;64487462;64585960;64585960;64585960;64675765;64675765;64675765;648…	63430179;63457664;63504135;63504135;63504135;63537713;63537713;63537713;63566970;63566970;63566970;63574727;63582063;63582063;63582063;63582063;63585641;63820485;63820485;63820485;63821215;63852825;63852825;63852825;63852825;64077487;64250778;64250778;64250778;64260965;64260965;64260965;64409283;64409283;64409283;64487618;64487618;64487618;64586160;64586160;64586160;64675916;64675916;64675916;648…	+;+;+;+;+;+;+;+;+;+;+;+;+;+;+;+;+;+;+;+;+;+;+;+;+;+;+;+;+;+;+;+;+;+;+;+;+;+;+;+;+;+;+;+;+;+;+;+;+;+;+;+;+;+;+;+;+;+;+	7227	0.220345	0.161239	0.181669	0.263326	0.104522	0.273181	0.253315	0.306226	0.14704	0.242995	0.279257	0.309979
Gm10118	10	63924866	63927434	-	2569	0.0167531	0	0	0	0	0	0.037506	0	0	0.066691	0.0196398	0
Lrrtm3	10;10;10;10;10;10;10;10;10	63928472;63929890;64087496;64087848;64089054;64089710;64089710;64090111;64090111	63930267;63930267;64089382;64089382;64089382;64090247;64090274;64090250;64090277	-;-;-;-;-;-;-;-;-	4251	1.79202	0.896155	0.378591	2.17787	1.1017	0.253324	1.04263	0.594978	0.187484	1.95471	0.344198	2.10794
Reep3	10;10;10;10;10;10;10;10	67009189;67014902;67021749;67034599;67035885;67039501;67062999;67096790	67013786;67015047;67021893;67034712;67036005;67039577;67063071;67096988	-;-;-;-;-;-;-;-	5473	13.1955	14.4617	14.0839	15.2526	13.8203	14.8064	11.3905	11.5368	12.5042	16.3331	13.1368	11.5278
Jmjd1c	10;10;10;10;10;10;10;10;10;10;10;10;10;10;10;10;10;10;10;10;10;10;10;10;10;10;10;10;10;10;10;10;10;10;10;10;10;10;10;10;10;10;10;10;10;10;10;10;10;10;10;10;10;10;10;10;10;10;10;10;10;10;10;10;10;10;10;10;10;10;10;10;10;10;10;10;10;10;10;10;10;10;10;10;10;10;10;10;10;10;10;10;10;10;10;10;10;10;10;10;10;10;10;10;10;10;10;10;10;10;10;10;10;10;10;10	67096125;67096405;67096492;67127258;67127258;67157907;67157907;67157907;67157907;67157907;67185749;67185750;67185753;67189736;67189736;67189736;67189736;67189736;67189736;67189736;67215270;67215270;67215270;67215270;67215270;67216983;67216983;67216983;67216983;67217740;67218038;67218038;67218038;67218117;67218277;67218277;67218277;67218277;67218277;67218954;67218954;67218954;67218954;67224009;672…	67096718;67096718;67096718;67127422;67127422;67158071;67158243;67158071;67158071;67158071;67186311;67186311;67186311;67189849;67191750;67191748;67189849;67189849;67189849;67189849;67216171;67215375;67215375;67215375;67215375;67217107;67217107;67217107;67217107;67218181;67218181;67218181;67218181;67218181;67218356;67218469;67218469;67218469;67218469;67220635;67220635;67220635;67220635;67224181;672…	+;+;+;+;+;+;+;+;+;+;+;+;+;+;+;+;+;+;+;+;+;+;+;+;+;+;+;+;+;+;+;+;+;+;+;+;+;+;+;+;+;+;+;+;+;+;+;+;+;+;+;+;+;+;+;+;+;+;+;+;+;+;+;+;+;+;+;+;+;+;+;+;+;+;+;+;+;+;+;+;+;+;+;+;+;+;+;+;+;+;+;+;+;+;+;+;+;+;+;+;+;+;+;+;+;+;+;+;+;+;+;+;+;+;+;+	14397	7.86817	8.40207	8.48989	9.36366	7.72324	8.43981	8.59995	9.14159	7.25195	8.50576	8.94706	8.07547
Nrbf2	10;10;10;10;10;10;10;10;10	67266689;67267841;67270106;67270106;67271400;67275570;67275570;67285097;67285097	67268166;67268166;67270146;67270146;67271446;67275654;67275654;67285305;67285180	-;-;-;-;-;-;-;-;-	1860	10.4357	10.9877	10.2921	10.4804	10.6132	10.8798	9.29857	10.15	9.71248	10.3857	9.43991	10.9135
Egr2	10;10;10;10;10;10;10;10;10;10;10;10;10;10;10;10;10;10;10	67535475;67535583;67535633;67537869;67537870;67537870;67537930;67538265;67538281;67538281;67538281;67538281;67538683;67539745;67539745;67539745;67539745;67539745;67539745	67535530;67535738;67535738;67538389;67538180;67538180;67537979;67538380;67538389;67538389;67538389;67538389;67538903;67542188;67542188;67539941;67540381;67540246;67542188	+;+;+;+;+;+;+;+;+;+;+;+;+;+;+;+;+;+;+	3398	0.83595	0.725429	0.448701	1.51366	0.755822	0.699856	0.921563	0.584835	0.656735	0.705888	0.712721	0.753457
Ado	10	67544512	67548955	-	4444	7.525	7.69495	6.78553	6.74753	6.08517	7.23937	7.36089	7.24635	6.49217	7.66239	6.76665	6.80019
Gm10797	10	67572042	67574263	+	2222	0	0	0	0	0	0	0	0	0.0239122	0	0	0
Zfp365	10;10;10;10;10;10;10;10;10;10;10;10;10;10;10	67886103;67886168;67889953;67889953;67889953;67896694;67897434;67897434;67897434;67898935;67901205;67909201;67909201;67912371;67912371	67889091;67889091;67889990;67889990;67889990;67897614;67897614;67897614;67897614;67899007;67901337;67909959;67909959;67912435;67912662	-;-;-;-;-;-;-;-;-;-;-;-;-;-;-	5205	0.471318	0.421921	0.471938	0.217397	0.406351	0.379304	0.296186	0.338414	0.469571	0.469057	0.368353	0.237157
Rtkn2	10;10;10;10;10;10;10;10;10;10;10;10;10;10;10;10;10;10;10;10;10;10;10;10;10;10;10;10;10;10;10;10;10;10;10;10;10;10;10;10;10;10;10;10;10;10;10;10;10;10;10;10;10;10;10;10;10;10;10;10;10;10;10;10;10;10;10;10;10	67979570;67979598;67979605;67979698;67979715;67987307;67987307;67987307;67987307;67987307;67997565;67997565;67997565;67997565;67997565;68001924;68001924;68001924;68001924;68001924;68003204;68003204;68003204;68003204;68003204;68005500;68005500;68005500;68005500;68005500;68013906;68017806;68017806;68017806;68017806;68017808;68025513;68025513;68025513;68025513;68025513;68026518;68026518;68026518;680…	67979812;67979812;67979812;67979812;67979812;67987503;67987503;67987512;67987503;67987512;67997623;67997623;67997623;67997623;67997623;68001977;68001977;68001977;68001977;68001977;68003321;68003321;68003321;68003321;68003321;68005694;68005694;68005694;68005689;68005694;68013915;68017900;68017900;68017900;68017900;68017900;68025619;68025619;68025619;68025619;68025619;68026649;68026649;68026649;680…	+;+;+;+;+;+;+;+;+;+;+;+;+;+;+;+;+;+;+;+;+;+;+;+;+;+;+;+;+;+;+;+;+;+;+;+;+;+;+;+;+;+;+;+;+;+;+;+;+;+;+;+;+;+;+;+;+;+;+;+;+;+;+;+;+;+;+;+;+	5547	0.512089	0.864532	0.748248	0.417258	0.481161	0.760371	0.634015	0.651382	0.708823	0.67951	0.52756	0.750027
Arid5b	10;10;10;10;10;10;10;10;10;10	68095593;68101895;68118251;68126699;68128789;68134994;68186026;68243004;68277930;68278690	68098669;68102093;68118348;68126751;68128993;68135106;68186256;68243229;68278184;68278726	-;-;-;-;-;-;-;-;-;-	4494	5.36308	8.07807	7.20952	9.13315	6.24158	7.22872	7.35404	7.15568	4.94205	7.95838	5.27675	6.75505
1700040L02Rik	10;10;10;10;10;10;10;10;10;10;10;10;10	68430953;68436280;68436280;68436843;68436843;68509697;68509697;68516266;68516266;68525598;68525598;68533812;68541747	68431323;68436420;68436420;68436965;68436965;68509769;68509769;68516410;68516410;68525767;68525767;68533900;68541896	-;-;-;-;-;-;-;-;-;-;-;-;-	1262	1.33004	1.06541	1.44307	1.14117	1.1173	1.45774	1.33611	1.28839	1.68409	1.32366	1.1994	1.08681
Tmem26	10;10;10;10;10;10	68723746;68740919;68748376;68751108;68775308;68778439	68724090;68740997;68748489;68751328;68775384;68782654	+;+;+;+;+;+	5052	0.212979	0.354856	0.0754496	0.22398	0.119616	0.150988	0.133506	0.0536404	0.105172	0.322175	0.0798966	0.180992
Rhobtb1	10;10;10;10;10;10;10;10;10;10;10;10;10;10;10;10;10;10;10;10;10;10;10;10;10;10;10;10;10;10;10;10;10;10;10;10;10;10;10;10;10;10;10;10;10;10;10;10;10;10;10;10;10;10;10;10;10;10;10;10;10;10;10;10;10;10;10;10;10;10;10;10;10;10;10;10;10;10;10;10;10;10;10;10;10;10;10;10	69151434;69155438;69208552;69212634;69212657;69212676;69213084;69213171;69213194;69215302;69215302;69215302;69215302;69215302;69215302;69215302;69215302;69215302;69219385;69219447;69248771;69248771;69248771;69248771;69248771;69248771;69248771;69248771;69248771;69248771;69249625;69249625;69249625;69249625;69249625;69249625;69249625;69249625;69249625;69249625;69261187;69265637;69266187;69266187;692…	69151488;69155531;69208612;69212734;69212734;69212734;69213375;69213375;69213375;69215352;69215352;69215352;69215352;69215352;69215352;69215352;69215352;69215352;69219539;69219539;69248972;69248972;69248972;69248972;69248972;69248972;69248972;69248972;69248972;69248972;69249728;69249728;69249728;69249723;69249728;69249728;69249728;69249728;69249713;69249728;69261245;69265792;69266372;69266372;692…	+;+;+;+;+;+;+;+;+;+;+;+;+;+;+;+;+;+;+;+;+;+;+;+;+;+;+;+;+;+;+;+;+;+;+;+;+;+;+;+;+;+;+;+;+;+;+;+;+;+;+;+;+;+;+;+;+;+;+;+;+;+;+;+;+;+;+;+;+;+;+;+;+;+;+;+;+;+;+;+;+;+;+;+;+;+;+;+	6075	24.7676	15.6772	16.2368	23.3591	15.9158	14.3732	27.8115	31.545	14.1338	20.6371	18.7285	23.8038
A930033H14Rik	10;10	69209762;69212753	69212384;69213098	-;-	2969	5.46501	3.74366	4.27946	5.14514	5.88562	4.54896	8.30796	11.3483	5.15403	4.89058	5.04717	4.34243
Cdk1	10;10;10;10;10;10;10;10;10;10;10;10;10;10;10;10;10;10;10;10;10;10;10;10;10;10;10;10;10;10;10;10;10;10;10;10	69336635;69338324;69340481;69340481;69340599;69340715;69340715;69340715;69340730;69340766;69340804;69342540;69342540;69342540;69342540;69342540;69342540;69345005;69345061;69345061;69345061;69345061;69345061;69346075;69346075;69346075;69346075;69350096;69350096;69350096;69350096;69350764;69351592;69352836;69352836;69352836	69338596;69338596;69340622;69340622;69340622;69340878;69340878;69340878;69340878;69340878;69340874;69342710;69342729;69342710;69342710;69342710;69342710;69345184;69345434;69345510;69345184;69345184;69345184;69346231;69346231;69346231;69346231;69350158;69350158;69350158;69350158;69350830;69351682;69352910;69352903;69352938	-;-;-;-;-;-;-;-;-;-;-;-;-;-;-;-;-;-;-;-;-;-;-;-;-;-;-;-;-;-;-;-;-;-;-;-	3445	14.4545	14.3236	18.49	11.2125	12.6152	15.4863	16.9492	15.8373	15.0222	11.5629	12.7711	18.2211
Ank3	10;10;10;10;10;10;10;10;10;10;10;10;10;10;10;10;10;10;10;10;10;10;10;10;10;10;10;10;10;10;10;10;10;10;10;10;10;10;10;10;10;10;10;10;10;10;10;10;10;10;10;10;10;10;10;10;10;10;10;10;10;10;10;10;10;10;10;10;10;10;10;10;10;10;10;10;10;10;10;10;10;10;10;10;10;10;10;10;10;10;10;10;10;10;10;10;10;10;10;10;10;10;10;10;10;10;10;10;10;10;10;10;10;10;10;10;10;10;10;10;10;10;10;10;10;10;10;10;10;10;10;10;10;…	69533772;69533772;69533772;69533815;69533843;69533847;69533847;69534065;69534208;69534222;69534222;69534222;69534222;69534222;69595050;69706296;69706370;69706474;69706478;69720799;69785514;69785525;69787456;69808416;69808416;69808416;69808416;69808416;69808416;69808416;69808416;69808416;69808416;69808416;69808416;69808416;69808416;69808416;69808416;69808416;69808873;69808873;69808873;69808873;698…	69534284;69534284;69534284;69534284;69534284;69534284;69534284;69534284;69534284;69534284;69534284;69534284;69534284;69534284;69595659;69710476;69706925;69706925;69706925;69720860;69785672;69785672;69787604;69808517;69808517;69808517;69808517;69808517;69808517;69808517;69808517;69808517;69808517;69808517;69808517;69808517;69808517;69808517;69808517;69808517;69808971;69808971;69808971;69808971;698…	+;+;+;+;+;+;+;+;+;+;+;+;+;+;+;+;+;+;+;+;+;+;+;+;+;+;+;+;+;+;+;+;+;+;+;+;+;+;+;+;+;+;+;+;+;+;+;+;+;+;+;+;+;+;+;+;+;+;+;+;+;+;+;+;+;+;+;+;+;+;+;+;+;+;+;+;+;+;+;+;+;+;+;+;+;+;+;+;+;+;+;+;+;+;+;+;+;+;+;+;+;+;+;+;+;+;+;+;+;+;+;+;+;+;+;+;+;+;+;+;+;+;+;+;+;+;+;+;+;+;+;+;+;+;+;+;+;+;+;+;+;+;+;+;+;+;+;+;+;+;+;+;+;+;+;+;+;+;+;+;+;+;+;+;+;+;+;+;+;+;+;+;+;+;+;+;+;+;+;+;+;+;+;+;+;+;+;+;+;+;+;+;+;+;+;+;+;+;+;+…	33152	3.01448	2.15493	3.32028	2.9757	2.39549	3.90203	4.38285	4.25331	3.09162	3.09433	4.31312	3.18288
Ccdc6	10;10;10;10;10;10;10;10;10;10;10;10;10;10;10;10;10;10	70097121;70142579;70154708;70167002;70169092;70174509;70175011;70175011;70175047;70182160;70182160;70182160;70182160;70187691;70187691;70187691;70187927;70189078	70097581;70142728;70154836;70167105;70169252;70175167;70175167;70175167;70175167;70182260;70182206;70182260;70182260;70188187;70187815;70187815;70188173;70193200	+;+;+;+;+;+;+;+;+;+;+;+;+;+;+;+;+;+	6385	10.0435	11.1537	10.0757	10.3915	9.12526	10.2951	10.0276	10.6529	8.696	10.3911	8.88193	9.85977
Mrln	10;10;10;10;10;10;10;10;10;10;10;10;10	70204664;70204667;70204710;70204725;70210660;70214931;70215761;70216897;70216952;70216952;70219477;70219477;70219477	70204759;70204759;70204759;70204759;70210946;70215285;70215797;70217066;70217066;70217066;70219710;70219711;70219580	+;+;+;+;+;+;+;+;+;+;+;+;+	1180	0.255315	0.189908	0.107676	0.174353	0.341413	0.41828	0.530758	0.34448	0.315196	0.399284	0.128275	0.271212
Slc16a9	10;10;10;10;10;10;10;10;10;10	70245100;70255960;70266979;70267092;70274926;70274926;70282289;70282289;70283874;70283874	70245378;70256192;70267235;70267235;70275021;70275021;70283197;70283197;70285968;70284080	+;+;+;+;+;+;+;+;+;+	3869	2.09131	2.20095	3.28398	1.94091	1.45778	3.07329	2.40322	3.28029	3.37832	2.28055	3.20803	1.87885
Fam13c	10;10;10;10;10;10;10;10;10;10;10;10;10;10;10;10;10;10;10;10;10;10;10;10;10;10;10;10;10;10;10;10;10;10;10;10;10;10;10;10;10;10;10	70440668;70440880;70440926;70441037;70448758;70448758;70448758;70451027;70451027;70451027;70477154;70477154;70477154;70498886;70498886;70498886;70520778;70520778;70520778;70534684;70534684;70534684;70536366;70536366;70536366;70542644;70542644;70542644;70544328;70544328;70544328;70551695;70551695;70551695;70553029;70553029;70553032;70554488;70554488;70554488;70557240;70557240;70557240	70440898;70441075;70441075;70441075;70448814;70448814;70448814;70451228;70451228;70451228;70477272;70477272;70477272;70498949;70498949;70498949;70520925;70520925;70520925;70534894;70534894;70534894;70536504;70536504;70536504;70542725;70542725;70542725;70544530;70544530;70544530;70551790;70551790;70551790;70553225;70553225;70553225;70554589;70554589;70554589;70558731;70558729;70558729	+;+;+;+;+;+;+;+;+;+;+;+;+;+;+;+;+;+;+;+;+;+;+;+;+;+;+;+;+;+;+;+;+;+;+;+;+;+;+;+;+;+;+	3520	3.32572	4.26538	3.47723	4.6466	3.31908	5.17534	2.90154	3.43871	3.80384	4.63611	3.29676	4.05234
Phyhipl	10;10;10;10;10;10;10;10;10;10;10;10;10;10;10;10;10;10;10;10;10;10;10;10;10;10;10;10;10;10;10;10;10;10;10;10;10;10;10;10;10;10	70557682;70558877;70559703;70563865;70565174;70565174;70565174;70567821;70568902;70568902;70568902;70568902;70570823;70570823;70570823;70570823;70570909;70592676;70599005;70599005;70599005;70601049;70601133;70607088;70607487;70607487;70607487;70607487;70607598;70609665;70614132;70625735;70625735;70625735;70625735;70626109;70626257;70626257;70651843;70655893;70655893;70655893	70559781;70559781;70559781;70565291;70565291;70565291;70565291;70571019;70569076;70569076;70569076;70569076;70571019;70571019;70571019;70571019;70571019;70592820;70599290;70599082;70599291;70602540;70602540;70607337;70607600;70607562;70607600;70607600;70607600;70609756;70614245;70625806;70625806;70625806;70625806;70626392;70626392;70626392;70651925;70655963;70655965;70655958	-;-;-;-;-;-;-;-;-;-;-;-;-;-;-;-;-;-;-;-;-;-;-;-;-;-;-;-;-;-;-;-;-;-;-;-;-;-;-;-;-;-	9732	0.172473	0.175	0.230649	0.200832	0.0827924	0.267413	0.217814	0.20884	0.152869	0.14964	0.181454	0.136235
4930533K18Rik	10;10;10;10;10;10;10	70868669;70872090;70875226;70923296;70923342;70925112;70933856	70868812;70872250;70875366;70923336;70923532;70925223;70934324	+;+;+;+;+;+;+	1259	2.08528	2.34949	2.01838	2.94142	1.51995	1.99581	2.37247	3.19278	2.06792	2.04125	2.36444	1.81567
Bicc1	10;10;10;10;10;10;10;10;10;10;10;10;10;10;10;10;10;10;10;10;10;10;10;10;10;10;10;10;10;10;10;10;10;10;10;10;10;10;10;10;10;10;10;10;10;10;10;10;10;10;10;10;10;10;10;10;10;10;10;10;10;10;10;10;10;10;10;10;10;10;10;10;10	70922832;70925102;70925102;70927715;70927715;70930591;70930591;70930591;70932085;70932085;70932085;70934502;70935832;70935832;70935832;70940486;70940486;70940486;70940486;70941000;70941000;70941000;70941000;70943370;70943370;70943370;70943370;70945225;70945225;70945225;70945225;70946545;70946545;70946545;70946545;70946805;70946805;70946805;70946805;70947772;70947772;70947772;70947772;70949939;709…	70925378;70925378;70925378;70927794;70927794;70930690;70930690;70930690;70932245;70932245;70932245;70935988;70935988;70935988;70935988;70940640;70940640;70940640;70940640;70941039;70941039;70941039;70941039;70943535;70943535;70943535;70943535;70945381;70945381;70945381;70945381;70946677;70946677;70946677;70946677;70947001;70947001;70947001;70947001;70948489;70947933;70947933;70947933;70950125;709…	-;-;-;-;-;-;-;-;-;-;-;-;-;-;-;-;-;-;-;-;-;-;-;-;-;-;-;-;-;-;-;-;-;-;-;-;-;-;-;-;-;-;-;-;-;-;-;-;-;-;-;-;-;-;-;-;-;-;-;-;-;-;-;-;-;-;-;-;-;-;-;-;-	7441	6.26407	8.33605	7.05778	9.2002	5.77962	7.56175	7.1737	6.29436	5.88383	7.78245	5.22109	9.06878
Tfam	10;10;10;10;10;10;10;10;10;10;10;10;10;10;10;10;10;10;10;10;10;10;10;10;10;10;10;10;10;10;10	71225464;71228446;71228457;71228512;71229087;71229087;71229087;71229087;71229116;71233357;71233357;71233357;71233357;71233357;71234865;71234865;71234865;71234865;71234865;71235283;71235543;71235543;71235543;71235543;71236916;71236916;71236916;71236916;71237458;71237840;71238235	71228699;71228699;71228699;71228699;71229143;71229143;71229143;71229143;71229143;71233452;71233452;71233452;71233452;71233452;71235014;71235014;71235014;71235014;71235014;71235321;71235613;71235613;71235613;71235613;71237042;71237031;71237031;71237031;71237678;71238280;71238280	-;-;-;-;-;-;-;-;-;-;-;-;-;-;-;-;-;-;-;-;-;-;-;-;-;-;-;-;-;-;-	4438	12.0155	11.755	11.2609	12.111	11.5173	12.5066	12.918	13.6167	11.6131	12.2957	13.1196	11.9808
Ube2d1	10;10;10;10;10;10;10;10;10;10;10;10;10	71254980;71255659;71256615;71256615;71257705;71258201;71259742;71259742;71262084;71262199;71262199;71285101;71285101	71255874;71255874;71256888;71256708;71258306;71258306;71262115;71259819;71262115;71262262;71262262;71285218;71285262	-;-;-;-;-;-;-;-;-;-;-;-;-	4371	6.41003	6.65456	5.99774	6.67195	7.17761	5.83074	6.09508	6.35475	6.12652	7.13381	6.17554	5.37621
Cisd1	10;10;10	71330480;71336214;71344724	71331126;71336419;71344954	-;-;-	1084	7.86132	7.85561	7.65781	7.63919	10.6849	9.89292	8.39977	7.16644	7.54841	10.5895	9.54171	9.40522
Ipmk	10;10;10;10;10;10;10;10;10;10;10;10;10;10;10;10;10;10;10;10;10;10;10;10;10;10;10;10;10;10	71347763;71347836;71347836;71347836;71347843;71363450;71363450;71363450;71363450;71363450;71366009;71366009;71366009;71366009;71372705;71372708;71372708;71372708;71376705;71376705;71376705;71376705;71381205;71381205;71381205;71381749;71402233;71409363;71432891;71432891	71348090;71348090;71348090;71348090;71348090;71363880;71363535;71363535;71363535;71363535;71366105;71366105;71366105;71366105;71372880;71372880;71372880;71372880;71376920;71376786;71376786;71377416;71382239;71382000;71385885;71381912;71402378;71409447;71433180;71433327	+;+;+;+;+;+;+;+;+;+;+;+;+;+;+;+;+;+;+;+;+;+;+;+;+;+;+;+;+;+	7093	2.02664	2.21153	2.57351	2.07389	2.15122	2.47345	2.0648	1.93574	1.96262	2.02899	2.16245	2.08838
Gm9923	10	72309225	72311848	+	2624	1.55819	1.33225	1.5979	1.56811	1.3434	1.55609	0.917996	1.08438	0.830203	1.50174	1.28829	1.35902
Zwint	10;10;10;10;10;10;10;10;10;10;10;10;10;10;10;10;10;10;10;10;10;10;10;10;10;10;10;10;10;10;10;10;10;10	72654845;72654895;72654896;72655443;72655983;72655983;72655983;72656237;72656238;72656238;72656238;72656238;72656530;72656530;72656530;72656530;72656591;72656817;72656817;72656817;72656817;72657046;72657046;72657046;72657046;72657266;72657266;72657266;72657266;72657266;72667899;72668812;72673966;72673966	72654977;72654977;72654977;72656073;72656073;72656073;72656073;72656696;72656361;72656361;72656361;72656361;72656598;72656696;72656696;72656696;72656653;72656873;72656873;72656873;72656873;72657185;72657185;72657185;72657185;72657388;72657388;72657388;72657388;72657388;72669789;72669165;72674324;72674964	+;+;+;+;+;+;+;+;+;+;+;+;+;+;+;+;+;+;+;+;+;+;+;+;+;+;+;+;+;+;+;+;+;+	4434	38.4961	39.9261	42.3142	36.9689	43.9643	42.5223	39.0714	33.0336	37.0397	38.9586	38.4953	39.893
Pcdh15	10;10;10;10;10;10;10;10;10;10;10;10;10;10;10;10;10;10;10;10;10;10;10;10;10;10;10;10;10;10;10;10;10;10;10;10;10;10;10;10;10;10;10;10;10;10;10;10;10;10;10;10;10;10;10;10;10;10;10;10;10;10;10;10;10;10;10;10;10;10;10;10;10;10;10;10;10;10;10;10;10;10;10;10;10;10;10;10;10;10;10;10;10;10;10;10;10;10;10;10;10;10;10;10;10;10;10;10;10;10;10;10;10;10;10;10;10;10;10;10;10;10;10;10;10;10;10;10;10;10;10;10;10;…	73099342;73099435;73099453;73483861;73483861;73483861;73714739;73714739;73821867;73821867;73821883;73821883;73821883;73821883;73821883;73821883;73821883;73821883;73821883;73821883;73821883;73821883;73821883;73821883;73821883;73821883;73821883;73821883;73821883;73821883;73821883;73821883;73821883;73821943;73821943;73821943;73947028;73947028;73947028;73947028;73947028;73947028;73947028;73947028;739…	73100216;73100216;73100216;73483933;73484120;73483933;73716595;73714787;73822263;73822259;73822259;73822263;73822259;73822259;73822259;73822259;73822259;73822259;73822259;73822259;73822259;73822259;73822259;73822259;73822259;73822259;73822259;73822259;73822259;73822259;73822259;73822259;73822263;73822259;73822259;73822259;73947146;73947146;73947146;73947146;73947146;73947146;73947146;73947146;739…	+;+;+;+;+;+;+;+;+;+;+;+;+;+;+;+;+;+;+;+;+;+;+;+;+;+;+;+;+;+;+;+;+;+;+;+;+;+;+;+;+;+;+;+;+;+;+;+;+;+;+;+;+;+;+;+;+;+;+;+;+;+;+;+;+;+;+;+;+;+;+;+;+;+;+;+;+;+;+;+;+;+;+;+;+;+;+;+;+;+;+;+;+;+;+;+;+;+;+;+;+;+;+;+;+;+;+;+;+;+;+;+;+;+;+;+;+;+;+;+;+;+;+;+;+;+;+;+;+;+;+;+;+;+;+;+;+;+;+;+;+;+;+;+;+;+;+;+;+;+;+;+;+;+;+;+;+;+;+;+;+;+;+;+;+;+;+;+;+;+;+;+;+;+;+;+;+;+;+;+;+;+;+;+;+;+;+;+;+;+;+;+;+;+;+;+;+;+;+;+…	23773	0.0887098	0.0584431	0.0516644	0.043271	0.0254197	0.0452984	0.0668752	0.0550957	0.0335252	0.0540516	0.0318353	0.0557709
Rsph14	10;10;10;10;10;10;10;10;10;10;10;10;10;10;10;10;10;10;10;10;10;10;10;10;10;10;10;10;10;10;10;10;10;10;10;10;10;10;10;10;10	74957477;74957477;74957477;74959568;74959568;74959568;74959672;74961507;74961507;74961507;74961507;74961671;75022304;75024513;75025046;75025046;75025046;75025046;75025046;75025046;75029703;75029703;75029703;75029703;75029703;75029703;75029703;75031114;75031114;75031114;75031114;75031114;75031114;75031114;75032504;75032504;75032524;75032524;75032524;75032524;75032524	74957783;74957783;74957783;74959704;74959704;74959704;74959704;74961732;74961732;74961732;74961732;74961732;75023559;75025164;75025164;75025164;75025164;75025164;75025164;75025164;75029805;75029805;75029805;75029805;75029805;75029805;75029805;75031358;75031361;75031358;75031361;75031361;75031358;75031361;75032553;75032553;75032586;75032528;75032562;75032586;75032565	-;-;-;-;-;-;-;-;-;-;-;-;-;-;-;-;-;-;-;-;-;-;-;-;-;-;-;-;-;-;-;-;-;-;-;-;-;-;-;-;-	3012	0	0	0.0421836	0.0170764	0	0.0297941	0	0	0.0176404	0	0	0
Gnaz	10;10;10;10;10;10;10;10	74967177;74967209;74978791;74990841;74990934;74990934;75014868;75014868	74967382;74967382;74978856;74992140;74992044;74992140;75016898;75016907	+;+;+;+;+;+;+;+	3612	1.62051	2.13421	1.58294	1.23886	2.34225	1.52796	1.04036	1.16289	1.38275	2.44282	1.98355	1.07588
Rab36	10;10;10;10;10;10;10;10;10;10;10;10;10;10;10;10;10;10;10;10;10;10;10;10;10;10;10;10;10;10;10;10;10;10;10;10;10;10;10;10;10;10;10;10;10;10;10;10;10;10;10;10;10;10;10;10;10;10;10;10;10	75037058;75037066;75037084;75037226;75037273;75037322;75037836;75038223;75038358;75038427;75038433;75038440;75038440;75041840;75041840;75041840;75041840;75041840;75041840;75041840;75041840;75044471;75044471;75044471;75044471;75044471;75044471;75044471;75044471;75046032;75046032;75046032;75046032;75046032;75046032;75046032;75048449;75048449;75048449;75048449;75048449;75048449;75049852;75049896;750…	75037321;75037321;75037321;75038520;75037321;75037483;75038520;75038520;75038520;75038520;75038520;75038520;75038520;75041931;75041931;75041931;75041931;75041931;75041931;75041931;75041931;75044536;75044536;75044536;75044536;75044536;75044536;75044536;75044536;75046133;75046094;75047572;75046133;75046133;75046133;75046133;75048513;75048788;75048513;75048513;75048513;75048513;75049951;75049951;750…	+;+;+;+;+;+;+;+;+;+;+;+;+;+;+;+;+;+;+;+;+;+;+;+;+;+;+;+;+;+;+;+;+;+;+;+;+;+;+;+;+;+;+;+;+;+;+;+;+;+;+;+;+;+;+;+;+;+;+;+;+	6175	2.30702	2.24999	2.46913	2.15731	1.95725	2.42698	1.88805	1.73347	2.44369	1.67167	2.13258	1.70288
Bcr	10;10;10;10;10;10;10;10;10;10;10;10;10;10;10;10;10;10;10;10;10;10;10	75060896;75125024;75131021;75131499;75135894;75140990;75143082;75145322;75153886;75154898;75157078;75158010;75159786;75160330;75166045;75168107;75175277;75176343;75177884;75180124;75181135;75181569;75182240	75062310;75125196;75131125;75131684;75136001;75141050;75143134;75145462;75154007;75155066;75157197;75158085;75159890;75160404;75166142;75168238;75175336;75176452;75178023;75180258;75181240;75181731;75184923	+;+;+;+;+;+;+;+;+;+;+;+;+;+;+;+;+;+;+;+;+;+;+	6537	7.89406	9.61225	9.49154	8.52907	9.86062	10.0146	7.6646	7.08189	8.86769	8.27553	8.0425	7.90303
Specc1l	10;10;10;10;10;10;10;10;10;10;10;10;10;10;10;10;10;10;10;10;10;10;10;10;10;10;10;10;10;10;10;10	75212073;75229855;75230682;75230682;75241065;75241065;75245079;75245079;75248437;75248437;75257868;75257868;75258968;75258968;75261794;75261794;75263279;75263279;75267499;75267499;75274017;75274017;75276771;75276771;75279859;75279859;75307237;75307237;75308034;75308034;75309790;75309790	75212219;75229868;75230871;75230871;75241218;75241218;75246712;75246712;75248644;75248644;75257941;75257941;75259143;75259143;75261957;75261957;75263370;75263370;75267589;75267589;75274100;75274100;75276927;75276927;75279961;75279961;75307353;75307353;75308093;75308093;75312399;75312399	+;+;+;+;+;+;+;+;+;+;+;+;+;+;+;+;+;+;+;+;+;+;+;+;+;+;+;+;+;+;+;+	6075	17.5839	18.3995	19.6668	20.1334	19.5714	21.7813	18.5331	17.2706	14.0289	21.2434	17.4328	22.3363
Adora2a	10;10;10	75316943;75325785;75333027	75317147;75326351;75334788	+;+;+	2534	0.254768	0.247615	0.317559	0.324761	0.536574	0.336436	0.266168	0.249532	0.335488	0.304255	0.119467	0.306716
Gucd1	10;10;10;10;10;10;10;10;10;10;10;10;10;10;10;10;10;10;10;10;10;10;10;10;10;10;10;10;10;10;10;10;10;10;10;10;10;10;10;10;10;10;10;10;10;10;10;10;10;10;10;10;10	75351111;75354655;75364934;75416467;75420665;75420665;75506283;75506825;75508798;75508832;75508965;75509592;75509592;75509592;75509592;75509592;75509592;75509697;75509717;75510032;75510032;75510032;75510032;75510032;75510032;75510032;75510032;75511121;75511121;75511121;75511121;75511121;75511121;75511121;75511121;75511121;75511180;75511903;75511921;75512072;75512072;75512072;75512072;75512072;755…	75352902;75354748;75365026;75418462;75420796;75420796;75508969;75508969;75508969;75508969;75508969;75510123;75509833;75509704;75509833;75509833;75509833;75509833;75509833;75510123;75510123;75510123;75510123;75510123;75510123;75510123;75510123;75511264;75511286;75511286;75511286;75511286;75511286;75511281;75511286;75511286;75511286;75512156;75512156;75512156;75512156;75512142;75512156;75512156;755…	-;-;-;-;-;-;-;-;-;-;-;-;-;-;-;-;-;-;-;-;-;-;-;-;-;-;-;-;-;-;-;-;-;-;-;-;-;-;-;-;-;-;-;-;-;-;-;-;-;-;-;-;-	8206	3.93884	3.79039	3.99989	3.62909	3.67594	3.8221	3.65756	3.69864	3.41874	3.73725	3.57229	3.76625
Upb1	10;10;10;10;10;10;10;10;10;10;10;10;10;10;10;10;10;10;10;10	75406911;75406958;75410043;75412767;75412767;75412767;75414990;75414990;75414990;75424493;75424493;75424493;75428181;75428181;75429962;75429962;75436146;75436876;75438057;75439854	75407159;75407159;75410221;75412938;75412938;75412938;75415077;75415077;75415077;75427777;75424777;75424587;75428342;75428342;75430319;75430131;75436227;75436918;75438211;75441679	+;+;+;+;+;+;+;+;+;+;+;+;+;+;+;+;+;+;+;+	6599	0.0978302	0.0543335	0.057762	0.070148	0.0457874	0.108792	0.0730057	0.0684425	0.152982	0.116833	0.14527	0.277125
Snrpd3	10;10;10;10;10;10	75517551;75518014;75519314;75519314;75532177;75535261	75518125;75518125;75519866;75519460;75532369;75537373	+;+;+;+;+;+	3434	62.9789	59.5011	54.9939	54.5794	51.1504	51.3378	60.7186	64.7622	59.3685	62.8514	61.5477	62.7467
Lrrc75b	10;10;10;10	75550125;75555950;75557220;75559956	75554120;75556050;75557348;75560330	-;-;-;-	4601	0.130959	0.058446	0.0920504	0.0558944	0.0656707	0.0975222	0.0523543	0.0588983	0.0923851	0.0837841	0.120626	0.02981
Ggt1	10;10;10;10;10;10;10;10;10;10;10;10;10;10;10;10;10;10;10;10;10;10;10;10;10;10;10;10;10;10;10;10;10;10;10;10;10;10;10;10;10;10;10;10;10;10;10;10;10;10;10;10;10;10;10;10;10;10;10;10;10;10;10;10;10;10;10;10;10;10;10;10;10;10;10;10;10;10;10;10;10;10;10;10;10;10;10;10;10;10;10;10;10;10;10;10;10;10;10;10;10;10;10;10;10;10;10;10;10;10;10;10;10;10;10;10;10;10;10;10;10;10;10;10;10;10;10;10	75561604;75561655;75561734;75564148;75564155;75564821;75564821;75564821;75564821;75566293;75566298;75568634;75568641;75568656;75568657;75568662;75568674;75571526;75571531;75571570;75573448;75573611;75573611;75573611;75573611;75573611;75573611;75573611;75573611;75573611;75573611;75573611;75573611;75573611;75573611;75573611;75573886;75573944;75574229;75574229;75574229;75574229;75574229;75574229;755…	75561647;75561806;75561806;75564258;75564258;75564905;75564905;75564905;75564905;75566349;75566349;75568766;75568766;75568770;75568969;75568770;75568770;75571643;75571643;75571643;75573748;75573748;75573748;75573748;75573748;75573748;75573748;75573748;75573748;75573748;75573748;75573748;75573748;75573748;75573748;75573748;75573943;75574051;75574280;75574396;75574396;75574396;75574396;75574396;755…	+;+;+;+;+;+;+;+;+;+;+;+;+;+;+;+;+;+;+;+;+;+;+;+;+;+;+;+;+;+;+;+;+;+;+;+;+;+;+;+;+;+;+;+;+;+;+;+;+;+;+;+;+;+;+;+;+;+;+;+;+;+;+;+;+;+;+;+;+;+;+;+;+;+;+;+;+;+;+;+;+;+;+;+;+;+;+;+;+;+;+;+;+;+;+;+;+;+;+;+;+;+;+;+;+;+;+;+;+;+;+;+;+;+;+;+;+;+;+;+;+;+;+;+;+;+;+;+	3411	0.26497	0.183951	0.285577	0.226183	0.147636	0.197317	0.254229	0.344267	0.0778848	0.175799	0.266252	0.20105
Ggt5	10;10;10;10;10;10;10;10;10;10;10;10;10;10;10;10;10;10;10;10;10;10;10;10	75589340;75589381;75589792;75602620;75602620;75602974;75602974;75603967;75603967;75604081;75604525;75604643;75605256;75605256;75605256;75605256;75608751;75608751;75609199;75609199;75609845;75610113;75610428;75614730	75589882;75589882;75589882;75602750;75602750;75603069;75603069;75604162;75604162;75604162;75604584;75604800;75605403;75605402;75605401;75605402;75608887;75608887;75609657;75609392;75609951;75610231;75610538;75617200	+;+;+;+;+;+;+;+;+;+;+;+;+;+;+;+;+;+;+;+;+;+;+;+	4736	1.76299	1.90213	2.61125	2.41097	1.72257	3.14545	1.77	1.62122	2.84962	1.84497	3.60086	1.52524
Susd2	10;10;10;10;10;10;10;10;10;10;10;10;10;10;10;10;10;10;10;10;10;10;10;10;10;10;10;10	75636619;75636619;75637501;75637501;75637682;75637682;75637965;75637965;75638347;75638347;75639342;75639342;75639595;75639595;75639834;75639834;75640189;75640189;75640456;75640456;75640775;75640775;75641433;75641433;75642125;75642463;75643874;75643874	75637370;75637370;75637606;75637606;75637858;75637858;75638237;75638237;75638595;75638595;75639500;75639500;75639738;75639738;75640102;75640102;75640274;75640274;75640657;75640657;75640949;75640949;75641600;75641600;75642276;75642670;75644008;75644008	-;-;-;-;-;-;-;-;-;-;-;-;-;-;-;-;-;-;-;-;-;-;-;-;-;-;-;-	3255	1.2429	0.771068	1.63945	1.46954	0.959209	1.66798	1.19886	0.999046	2.07308	1.13167	0.992043	0.772512
Cabin1	10;10;10;10;10;10;10;10;10;10;10;10;10;10;10;10;10;10;10;10;10;10;10;10;10;10;10;10;10;10;10;10;10;10;10;10;10	75646110;75646875;75648057;75652875;75655366;75656775;75657796;75658634;75684292;75694715;75699913;75713453;75715599;75717438;75721278;75725259;75725549;75726858;75732400;75733620;75734966;75737321;75738211;75739326;75740020;75742245;75743202;75745229;75746488;75747826;75750044;75751436;75753377;75754251;75754812;75755369;75764025	75646687;75647101;75648221;75653142;75655440;75657452;75657892;75658797;75684405;75695046;75700095;75713631;75715750;75717698;75721539;75725404;75725755;75727019;75732515;75733776;75735208;75737515;75738363;75739513;75740098;75742462;75743338;75745397;75746774;75747975;75750173;75751616;75753511;75754364;75754904;75755500;75764357	-;-;-;-;-;-;-;-;-;-;-;-;-;-;-;-;-;-;-;-;-;-;-;-;-;-;-;-;-;-;-;-;-;-;-;-;-	7460	11.3943	11.493	10.5767	12.3552	9.90293	11.7348	11.6243	12.1934	10.6907	10.6162	10.5847	11.1049
Ddt	10;10;10;10;10	75771230;75771233;75772738;75772738;75773216	75771506;75771506;75772913;75773034;75773414	-;-;-;-;-	773	31.5135	26.7286	32.9833	29.0107	34.0066	35.1762	29.2923	25.6501	43.7161	27.9823	31.4608	32.4703
Gm20441	10;10;10;10;10;10	75771451;75772738;75775871;75776744;75778101;75780847	75771506;75772913;75776047;75776894;75778188;75780954	-;-;-;-;-;-	756	23.1703	18.7336	26.7783	18.0972	23.2475	27.5392	20.0735	19.237	32.681	18.8666	22.8247	23.8874
Gstt3	10;10;10;10;10;10;10;10;10;10;10;10;10;10;10;10;10;10;10;10	75774115;75774800;75774920;75775400;75775490;75775871;75775871;75775871;75776744;75776744;75776744;75776744;75776754;75777200;75778101;75778101;75778101;75780632;75780847;75780847	75775010;75775010;75775010;75776047;75775497;75776047;75776047;75776047;75776864;75776894;75776894;75776894;75776894;75777260;75778188;75778188;75778188;75781050;75781414;75781018	-;-;-;-;-;-;-;-;-;-;-;-;-;-;-;-;-;-;-;-	2627	0.311281	0.341213	0.419171	0.19579	0.210865	0.597811	0.366779	0.275083	0.748352	0.21196	0.364918	0.261051
Gstt1	10;10;10;10;10;10;10;10;10;10;10;10;10	75783813;75783984;75786795;75786795;75786795;75794077;75794077;75794077;75797043;75797043;75797043;75797680;75798385	75784233;75784233;75786971;75786971;75786971;75794227;75794227;75794227;75797569;75797130;75797130;75797731;75798584	-;-;-;-;-;-;-;-;-;-;-;-;-	1528	4.33767	2.9918	5.29405	3.90468	3.36163	6.37224	5.86441	4.7589	5.94617	4.06458	4.68885	4.24872
Gstt4	10;10;10;10;10;10;10;10;10;10	75814943;75814944;75817199;75817199;75818500;75818500;75821231;75821231;75822312;75822312	75815258;75815226;75817375;75817375;75818650;75818650;75821343;75821318;75822527;75822543	-;-;-;-;-;-;-;-;-;-	989	0.0870349	0.181267	0.299764	0.0520061	0.101837	0.136107	0.0974246	0.228338	0.107448	0.216543	0.153048	0.0924543
Gstt2	10;10;10;10;10	75831845;75832395;75832661;75833652;75834175	75832094;75832568;75832811;75833739;75834881	-;-;-;-;-	1370	5.71756	3.66398	5.84277	5.63146	4.33745	7.66392	7.38471	6.7583	8.14447	3.43909	6.18715	4.50512
Mif	10;10;10	75859353;75859687;75860061	75859543;75859859;75860250	-;-;-	554	115.832	120.621	133.173	100.083	102.626	101.16	121.659	119.598	120.46	90.4581	111.565	122.054
Derl3	10;10;10;10;10;10;10	75893398;75893619;75893770;75893967;75894432;75895039;75895247	75893517;75893684;75893843;75894060;75894627;75895129;75895941	+;+;+;+;+;+;+	1336	29.0254	17.612	19.2424	18.7103	17.3013	24.6852	27.8024	27.4507	21.9929	19.8773	22.2816	24.8783
Smarcb1	10;10;10;10;10;10;10;10;10;10;10;10;10;10;10;10;10;10;10;10;10;10;10;10;10;10;10;10;10;10;10;10;10;10;10;10;10;10	75896769;75896773;75896775;75896777;75897445;75897445;75897445;75897445;75897528;75904384;75904384;75904384;75904384;75904384;75906030;75906030;75906030;75906030;75910154;75910154;75910154;75910154;75910154;75910264;75911519;75911519;75911519;75911519;75911519;75911519;75915064;75915064;75915064;75916773;75916800;75921303;75921303;75921303	75897088;75897088;75897088;75897088;75897605;75897576;75897576;75897576;75897576;75906196;75904574;75904574;75904574;75904574;75906196;75906196;75906196;75906196;75910281;75910281;75910281;75910281;75910281;75910281;75916572;75914162;75911656;75911826;75911656;75911656;75915164;75915193;75915193;75916911;75916911;75921589;75921614;75921617	-;-;-;-;-;-;-;-;-;-;-;-;-;-;-;-;-;-;-;-;-;-;-;-;-;-;-;-;-;-;-;-;-;-;-;-;-;-	7930	13.9103	13.5924	13.4054	13.2509	12.8659	14.0212	14.8964	15.1215	13.9834	14.1352	13.5903	14.4536
Mmp11	10;10;10;10;10;10;10;10;10;10;10;10;10;10;10;10;10;10;10;10;10;10;10;10;10	75923222;75923222;75923222;75923223;75923928;75923959;75924063;75925420;75925420;75925420;75926411;75926411;75926411;75926748;75926748;75926760;75927129;75927129;75927129;75927347;75927347;75928280;75928280;75932334;75932334	75924115;75923490;75923490;75923490;75923993;75924115;75924115;75925677;75925677;75925677;75926412;75926627;75926627;75926989;75926989;75926989;75927690;75927262;75927262;75927490;75927490;75928509;75928509;75932502;75932475	-;-;-;-;-;-;-;-;-;-;-;-;-;-;-;-;-;-;-;-;-;-;-;-;-	2572	24.6653	30.1983	24.6836	23.5373	24.6702	27.5814	28.8459	23.0041	30.4709	29.6928	27.9737	20.2819
Chchd10	10;10;10;10	75935573;75936238;75937307;75937575	75936004;75936445;75937454;75937725	+;+;+;+	939	55.5516	70.8788	76.2252	57.0211	73.3657	70.5305	67.8267	65.9922	99.6456	64.2256	78.8254	49.419
Vpreb3	10;10;10;10	75943057;75948300;75949143;75949143	75943290;75948409;75949637;75949657	+;+;+;+	859	2.60537	1.82612	2.95826	2.45494	1.70011	2.24611	4.09416	3.31247	2.0412	1.7452	2.4082	2.66116
Gm5134	10;10;10;10;10;10;10;10;10;10;10;10;10;10;10;10;10;10;10;10;10;10	75954514;75964416;75966351;75974086;75974181;75976312;75976312;75978309;75978309;75985920;75985920;75992395;75992395;75993825;75993825;75995780;75995780;75998160;76000389;76004695;76005990;76008502	75954700;75964520;75966410;75974285;75974285;75976417;75976417;75978389;75978389;75986140;75986140;75992530;75992530;75993932;75993932;75995930;75995930;75998354;76000557;76004910;76006092;76009591	+;+;+;+;+;+;+;+;+;+;+;+;+;+;+;+;+;+;+;+;+;+	3128	0.220147	0.343874	0.257255	0.230204	0.43468	0.200825	0.323435	0.649755	0.186849	0.369716	0.20969	0.672333
Zfp280b	10;10	76032654;76038234	76032749;76043234	+;+	5097	7.49822	10.6836	8.73305	7.14446	10.4926	8.09015	8.27043	6.86738	7.23451	10.2606	7.16681	9.58863
Slc5a4b	10;10;10;10;10;10;10;10;10;10;10;10;10;10;10	76057494;76060349;76062214;76063954;76070504;76072428;76074980;76081316;76089906;76090679;76103824;76106707;76108498;76110018;76110802	76058899;76060454;76062429;76064122;76070654;76072535;76075115;76081536;76089986;76090784;76103928;76106766;76108602;76110089;76110961	-;-;-;-;-;-;-;-;-;-;-;-;-;-;-	3202	0.255383	3.47125	0.317444	0.899533	2.8309	0.112105	0.481464	0.282106	0.431436	3.70535	0.346659	0.356954
Slc5a4a	10;10;10;10;10;10;10;10;10;10;10;10;10;10;10	76147451;76148361;76150467;76153577;76157018;76162523;76163689;76166676;76170651;76176519;76178090;76181651;76182670;76186498;76189059	76147665;76148432;76150571;76153636;76157122;76162628;76163769;76166896;76170786;76176626;76178240;76181819;76182885;76186600;76189265	+;+;+;+;+;+;+;+;+;+;+;+;+;+;+	2055	1.34038	4.57997	1.99911	1.72698	3.28372	1.85594	1.52383	1.7143	1.73232	5.7735	1.76776	1.53508
Prmt2	10;10;10;10;10;10;10;10;10;10;10;10;10;10;10;10;10;10;10;10;10;10;10;10;10;10;10;10;10;10;10;10;10;10;10;10;10;10;10;10;10;10;10;10;10;10;10;10;10;10;10;10;10;10;10;10;10;10;10;10;10;10;10;10	76207222;76207227;76207232;76207232;76207976;76208412;76208412;76208412;76208412;76208418;76208444;76209338;76209338;76209338;76209338;76209338;76209338;76209338;76210398;76210398;76210398;76210398;76210398;76210398;76210398;76211052;76211408;76217314;76217314;76217314;76217314;76217314;76217580;76217580;76220998;76220998;76220998;76220998;76220998;76222449;76222449;76222449;76222449;76222449;762…	76207793;76207793;76207793;76207793;76208583;76208673;76208583;76208583;76208583;76208583;76208583;76209474;76209474;76209474;76209474;76209474;76209474;76209474;76210527;76210863;76210527;76210527;76210527;76210527;76210527;76211110;76211549;76217489;76217489;76217489;76217489;76217489;76217641;76217641;76221162;76221162;76221162;76221162;76221162;76222610;76222610;76222610;76222610;76222610;762…	-;-;-;-;-;-;-;-;-;-;-;-;-;-;-;-;-;-;-;-;-;-;-;-;-;-;-;-;-;-;-;-;-;-;-;-;-;-;-;-;-;-;-;-;-;-;-;-;-;-;-;-;-;-;-;-;-;-;-;-;-;-;-;-	3177	8.08755	12.2873	9.14502	8.25664	10.1922	9.06721	7.03616	6.61058	7.59282	11.4327	8.75056	8.70626
S100b	10;10;10	76253853;76257027;76259928	76253958;76257172;76261159	+;+;+	1484	0.899057	4.22814	0.656405	0.970454	1.05196	0.665188	0.422031	0.304348	0.572862	4.12737	0.849978	0.308077
Dip2a	10;10;10;10;10;10;10;10;10;10;10;10;10;10;10;10;10;10;10;10;10;10;10;10;10;10;10;10;10;10;10;10;10;10;10;10;10;10;10;10;10;10;10;10;10;10;10;10;10;10;10;10;10;10;10;10;10;10;10;10;10;10;10;10;10;10;10;10;10;10;10;10;10;10;10;10;10;10;10;10;10;10;10;10;10;10;10;10;10;10;10;10;10;10;10;10;10;10;10;10;10;10;10;10;10;10;10;10;10;10;10;10;10;10;10;10;10;10;10;10;10;10;10;10;10;10;10;10;10;10;10;10;10;…	76259429;76262736;76263034;76263051;76263051;76263162;76264583;76264672;76265498;76265498;76265498;76265498;76265498;76265498;76266317;76266317;76266317;76266317;76266317;76268492;76268492;76268492;76268492;76268492;76270104;76270104;76270104;76270104;76270104;76270396;76270396;76270396;76270396;76270396;76271376;76272533;76272533;76272533;76272533;76273035;76273035;76273035;76273035;76274149;762…	76259722;76264873;76264873;76264873;76264873;76263215;76264873;76264873;76265621;76265621;76265621;76265621;76265508;76265621;76266491;76266491;76266491;76266491;76266491;76268566;76268566;76268566;76268566;76268566;76270161;76270161;76270161;76270161;76270161;76270571;76270457;76270457;76270457;76270457;76271405;76272703;76272703;76272703;76272703;76273203;76273203;76273203;76273203;76274279;762…	-;-;-;-;-;-;-;-;-;-;-;-;-;-;-;-;-;-;-;-;-;-;-;-;-;-;-;-;-;-;-;-;-;-;-;-;-;-;-;-;-;-;-;-;-;-;-;-;-;-;-;-;-;-;-;-;-;-;-;-;-;-;-;-;-;-;-;-;-;-;-;-;-;-;-;-;-;-;-;-;-;-;-;-;-;-;-;-;-;-;-;-;-;-;-;-;-;-;-;-;-;-;-;-;-;-;-;-;-;-;-;-;-;-;-;-;-;-;-;-;-;-;-;-;-;-;-;-;-;-;-;-;-;-;-;-;-;-;-;-;-;-;-;-;-;-;-;-;-;-;-;-;-;-;-;-;-;-;-;-;-;-	8215	3.66733	3.44798	3.05721	3.0491	3.4451	3.44103	2.85012	2.53453	2.97519	3.1857	2.90506	3.25568
Pcnt	10;10;10;10;10;10;10;10;10;10;10;10;10;10;10;10;10;10;10;10;10;10;10;10;10;10;10;10;10;10;10;10;10;10;10;10;10;10;10;10;10;10	76351254;76352909;76354173;76355059;76356164;76357035;76367308;76368731;76369835;76374851;76379905;76380163;76381233;76382020;76384741;76385704;76387427;76388852;76392194;76399856;76401332;76403624;76403758;76404422;76408698;76409468;76411526;76412021;76412498;76418360;76419978;76422768;76426885;76427813;76429200;76433004;76433607;76433985;76436426;76437145;76440143;76442565	76351779;76353036;76354311;76355135;76356396;76357154;76367481;76368833;76370079;76375300;76380055;76380439;76381425;76382187;76384905;76385870;76387529;76389532;76393039;76400026;76401535;76403644;76403874;76404651;76408910;76409630;76411758;76412172;76412649;76418566;76420542;76423225;76426972;76428053;76429311;76433140;76433781;76434040;76436681;76437216;76440355;76442912	-;-;-;-;-;-;-;-;-;-;-;-;-;-;-;-;-;-;-;-;-;-;-;-;-;-;-;-;-;-;-;-;-;-;-;-;-;-;-;-;-;-	9530	24.7891	24.8029	26.4869	24.9668	27.5624	27.2657	24.1287	23.0802	22.4686	26.9578	26.6198	27.3976
2610028H24Rik	10;10;10;10;10;10;10;10;10;10;10;10;10;10;10;10	76449081;76450327;76450633;76450633;76451313;76451313;76452784;76452784;76454705;76454705;76457501;76457501;76457880;76457880;76460487;76460487	76449321;76450376;76450669;76450669;76451386;76451386;76452948;76452948;76454819;76454819;76457616;76457616;76458162;76458162;76461110;76461095	+;+;+;+;+;+;+;+;+;+;+;+;+;+;+;+	1705	0.252427	0.157718	0.1242	0.150833	0.236286	0.210534	0.197792	0.238409	0.186978	0.175851	0.207145	0.24133
Ybey	10;10;10;10;10	76459569;76464257;76466237;76468157;76468774	76463319;76464325;76466365;76468386;76469114	-;-;-;-;-	4520	0.790313	0.822991	0.787079	0.603098	0.80217	1.02248	0.682144	0.679477	0.752326	0.928665	0.759053	0.981131
Mcm3ap	10;10;10;10;10;10;10;10;10;10;10;10;10;10;10;10;10;10;10;10;10;10;10;10;10;10;10;10;10	76468971;76469949;76471423;76476514;76476783;76477720;76481001;76482624;76483115;76484654;76488342;76489335;76489868;76490728;76492861;76493430;76496408;76499456;76501062;76501210;76502652;76504163;76504630;76506298;76507290;76508298;76511020;76512418;76515582	76469214;76471252;76471649;76476592;76476924;76477910;76481140;76482821;76483383;76484816;76488502;76489576;76490067;76490828;76492992;76493543;76496560;76499653;76501130;76501344;76502805;76504421;76504727;76506688;76507547;76508427;76511223;76512568;76515856	+;+;+;+;+;+;+;+;+;+;+;+;+;+;+;+;+;+;+;+;+;+;+;+;+;+;+;+;+	6382	11.3363	11.4539	11.3678	11.7423	11.5678	11.9803	12.3649	12.229	10.54	11.5168	12.7125	11.7628
Lss	10;10;10;10;10;10;10;10;10;10;10;10;10;10;10;10;10;10;10;10;10;10;10;10;10;10;10;10;10;10;10;10;10;10;10;10;10;10;10;10;10;10;10;10;10;10;10;10;10;10;10;10;10;10;10;10;10;10;10;10;10;10;10;10;10;10;10;10;10;10;10;10;10	76531588;76531607;76531607;76531612;76531682;76531850;76531850;76531850;76531850;76533513;76533513;76533513;76533513;76533513;76535559;76535559;76535559;76535559;76535559;76536244;76536244;76537569;76538352;76538352;76538352;76539785;76539785;76539785;76540312;76540312;76540312;76540846;76540846;76540846;76541819;76541819;76541819;76541882;76542468;76542468;76542468;76542468;76543851;76543851;765…	76531621;76531674;76531674;76531674;76532018;76532018;76532018;76532018;76532018;76533651;76533651;76533651;76533651;76533651;76535723;76536365;76535568;76535667;76535667;76536365;76536365;76537663;76538448;76538448;76538448;76539920;76539920;76539920;76540420;76540420;76540420;76540964;76540964;76540964;76541916;76541916;76541916;76541916;76542495;76542495;76542746;76542495;76543907;76543907;765…	+;+;+;+;+;+;+;+;+;+;+;+;+;+;+;+;+;+;+;+;+;+;+;+;+;+;+;+;+;+;+;+;+;+;+;+;+;+;+;+;+;+;+;+;+;+;+;+;+;+;+;+;+;+;+;+;+;+;+;+;+;+;+;+;+;+;+;+;+;+;+;+;+	10787	1.47226	2.31009	1.4959	1.44475	6.07364	2.44171	1.4783	1.03419	1.67965	2.6723	2.40884	1.31812
Spatc1l	10;10;10;10;10;10;10;10	76562272;76562309;76563848;76563848;76569336;76569336;76569666;76569666	76562567;76562567;76564195;76564131;76569487;76569487;76570030;76570201	+;+;+;+;+;+;+;+	1332	0	0	0	0	0	0	0	0	0.0797793	0	0	0
Ftcd	10;10;10;10;10;10;10;10;10;10;10;10;10;10;10;10;10;10;10;10;10;10;10;10;10;10;10;10;10;10	76575648;76575652;76576501;76576501;76578002;76578002;76579783;76579990;76579990;76581295;76581295;76581503;76581503;76583811;76583811;76584170;76584532;76584532;76587133;76587133;76587133;76587301;76587301;76587301;76588070;76588070;76588070;76588384;76589226;76589226	76575759;76575759;76576684;76576684;76578130;76578130;76579871;76580169;76580169;76581432;76581432;76581634;76581634;76584299;76583872;76584299;76584693;76584693;76587176;76587176;76587176;76587439;76587439;76587439;76588165;76588165;76588165;76588568;76590338;76589561	+;+;+;+;+;+;+;+;+;+;+;+;+;+;+;+;+;+;+;+;+;+;+;+;+;+;+;+;+;+	3192	0.12135	0.252735	0.145951	0.0483403	0.173541	0.112456	0.166022	0.141495	0.133165	0.161024	0.158066	0.315104
Col6a2	10;10;10;10;10;10;10;10;10;10;10;10;10;10;10;10;10;10;10;10;10;10;10;10;10;10;10;10;10;10;10;10;10;10;10;10;10;10;10;10;10;10;10;10;10;10;10;10;10;10;10;10;10;10;10;10;10;10;10;10;10;10;10;10;10;10;10;10;10;10;10;10;10;10;10;10;10;10;10;10;10;10;10	76595762;76597835;76601011;76603329;76603329;76603462;76603462;76603462;76604056;76604056;76604056;76604345;76604345;76604345;76604849;76604849;76604849;76605060;76605060;76605060;76605774;76605774;76605774;76606172;76606172;76606172;76606575;76606575;76606575;76607095;76607095;76607095;76607727;76607727;76607727;76608107;76608107;76608107;76608708;76608708;76608708;76609257;76609257;76609257;766…	76596811;76599893;76603367;76603367;76603367;76603914;76603914;76603914;76604208;76604208;76604208;76604390;76604390;76604390;76604884;76604884;76604884;76605122;76605122;76605122;76605836;76605836;76605836;76606207;76606207;76606207;76606625;76606625;76606625;76607157;76607157;76607157;76607789;76607789;76607789;76608169;76608169;76608169;76608770;76608770;76608770;76609346;76609346;76609346;766…	-;-;-;-;-;-;-;-;-;-;-;-;-;-;-;-;-;-;-;-;-;-;-;-;-;-;-;-;-;-;-;-;-;-;-;-;-;-;-;-;-;-;-;-;-;-;-;-;-;-;-;-;-;-;-;-;-;-;-;-;-;-;-;-;-;-;-;-;-;-;-;-;-;-;-;-;-;-;-;-;-;-;-	8326	33.9616	56.79	37.7438	52.1692	36.0058	37.9234	34.4225	29.5532	31.7037	54.8856	24.5486	40.7218
Col6a1	10;10;10;10;10;10;10;10;10;10;10;10;10;10;10;10;10;10;10;10;10;10;10;10;10;10;10;10;10;10;10;10;10;10;10;10;10;10;10;10;10;10;10;10;10;10;10	76708792;76710346;76710962;76711283;76711575;76712268;76712865;76713185;76713626;76713873;76714114;76714414;76714658;76714995;76715016;76715271;76716261;76716261;76716719;76716719;76717129;76717129;76717262;76717262;76717400;76717400;76717795;76717795;76718059;76718059;76718373;76718373;76718517;76718517;76718979;76718979;76719125;76719125;76719623;76720961;76721088;76721263;76721403;76721816;767…	76710181;76710375;76711139;76711466;76711684;76712401;76712873;76713221;76713661;76713938;76714176;76714449;76714708;76715057;76715333;76715333;76716323;76716323;76716781;76716781;76717164;76717164;76717315;76717315;76717462;76717462;76717857;76717857;76718112;76718112;76718417;76718417;76718543;76718543;76719005;76719005;76719236;76719169;76719676;76721005;76721108;76721283;76721531;76721975;767…	-;-;-;-;-;-;-;-;-;-;-;-;-;-;-;-;-;-;-;-;-;-;-;-;-;-;-;-;-;-;-;-;-;-;-;-;-;-;-;-;-;-;-;-;-;-;-	4380	114.544	250.021	124.93	169.039	203.641	126.158	102.237	96.3525	114.369	235.265	109.019	114.975
Pcbp3	10;10;10;10;10;10;10;10;10;10;10;10;10;10;10;10;10;10;10;10;10;10;10;10;10;10;10;10;10;10;10;10;10;10;10;10;10;10;10;10;10;10;10;10;10;10;10;10;10;10;10;10;10;10;10;10;10;10;10;10;10;10;10;10;10;10;10;10;10;10;10;10;10;10;10;10;10;10;10;10;10;10;10;10;10;10;10;10;10;10;10;10;10;10;10;10;10;10;10;10;10	76761857;76761858;76761858;76761860;76762232;76762370;76763222;76763222;76763222;76763222;76763222;76763222;76763305;76767864;76767864;76767864;76767864;76767864;76767864;76767864;76770260;76770260;76770260;76770260;76770961;76770961;76770961;76770961;76781832;76781832;76781832;76781832;76781832;76781832;76781832;76785071;76785071;76785140;76785140;76785140;76785140;76785140;76788391;76788391;767…	76762526;76762526;76762526;76762526;76762526;76762526;76763391;76763391;76763391;76763391;76763391;76763391;76763391;76767916;76767916;76767916;76767916;76767916;76767916;76767916;76770319;76770319;76770319;76770319;76771036;76771036;76771039;76771039;76781873;76781873;76781873;76781873;76781873;76781873;76781873;76785214;76785214;76785214;76785214;76785214;76785214;76785214;76788519;76788519;767…	-;-;-;-;-;-;-;-;-;-;-;-;-;-;-;-;-;-;-;-;-;-;-;-;-;-;-;-;-;-;-;-;-;-;-;-;-;-;-;-;-;-;-;-;-;-;-;-;-;-;-;-;-;-;-;-;-;-;-;-;-;-;-;-;-;-;-;-;-;-;-;-;-;-;-;-;-;-;-;-;-;-;-;-;-;-;-;-;-;-;-;-;-;-;-;-;-;-;-;-;-	2933	3.09621	2.78109	3.33563	3.5248	3.02185	4.29883	3.31798	2.94121	3.64123	3.19818	3.47489	3.70987
Gm10787	10;10;10	77011995;77016651;77021235	77012388;77016824;77022214	+;+;+	1548	0	0.173714	0.0547188	0.0664522	0.162657	0.0289858	0.0622435	0.0875295	0.102971	0	0.065187	0.029534
Slc19a1	10;10;10;10;10;10;10;10;10;10;10;10;10;10;10;10;10;10;10;10;10;10;10;10;10;10;10;10;10;10;10;10;10;10	77032241;77032271;77032684;77033212;77033268;77033281;77033319;77038350;77038350;77038350;77038350;77038350;77038350;77038350;77041816;77041816;77041816;77041816;77041816;77041816;77042500;77042782;77042782;77042782;77042791;77042898;77044761;77044761;77044761;77044761;77044761;77049540;77049540;77060644	77032290;77032399;77032780;77033347;77033445;77033347;77033450;77038579;77038579;77038579;77038579;77038579;77038579;77038579;77042330;77042569;77042569;77042569;77042361;77041847;77042974;77042974;77042974;77042974;77042974;77042956;77044898;77044902;77044902;77046268;77044902;77050431;77050432;77061002	+;+;+;+;+;+;+;+;+;+;+;+;+;+;+;+;+;+;+;+;+;+;+;+;+;+;+;+;+;+;+;+;+;+	4644	1.03797	0.955429	1.23117	0.863879	0.921721	0.966193	0.944026	1.15733	0.880973	0.959207	0.869159	1.04354
Col18a1	10;10;10;10;10;10;10;10;10;10;10;10;10;10;10;10;10;10;10;10;10;10;10;10;10;10;10;10;10;10;10;10;10;10;10;10;10;10;10;10;10;10;10;10;10;10;10;10;10;10;10;10;10;10;10;10;10;10;10;10;10;10;10;10;10;10;10;10;10;10;10;10;10;10;10;10;10;10;10;10;10;10;10;10;10;10;10;10;10;10;10;10;10;10;10;10;10;10;10;10;10;10;10;10;10;10;10;10;10;10;10;10;10;10;10;10;10;10;10;10;10;10;10;10;10;10;10;10;10;10;10;10	77052178;77052181;77053016;77054155;77054155;77054155;77054784;77054784;77054784;77055579;77055579;77055579;77057369;77057369;77057369;77058699;77058699;77058699;77059105;77059105;77059105;77059258;77059258;77059258;77059895;77059895;77059895;77060369;77060369;77060369;77063979;77063979;77063979;77064537;77064537;77064537;77065235;77065235;77065235;77066950;77066950;77066950;77067379;77067379;770…	77053407;77053407;77053407;77054270;77054270;77054270;77054981;77054981;77054981;77055827;77055827;77055827;77057401;77057401;77057401;77058830;77058830;77058830;77059178;77059178;77059178;77059402;77059402;77059402;77060023;77060023;77060023;77060412;77060412;77060412;77064041;77064041;77064041;77064579;77064579;77064579;77065303;77065303;77065303;77067024;77067024;77067024;77067432;77067432;770…	-;-;-;-;-;-;-;-;-;-;-;-;-;-;-;-;-;-;-;-;-;-;-;-;-;-;-;-;-;-;-;-;-;-;-;-;-;-;-;-;-;-;-;-;-;-;-;-;-;-;-;-;-;-;-;-;-;-;-;-;-;-;-;-;-;-;-;-;-;-;-;-;-;-;-;-;-;-;-;-;-;-;-;-;-;-;-;-;-;-;-;-;-;-;-;-;-;-;-;-;-;-;-;-;-;-;-;-;-;-;-;-;-;-;-;-;-;-;-;-;-;-;-;-;-;-;-;-;-;-;-;-	7021	13.958	19.3802	18.4526	18.5122	22.1417	18.4631	18.1905	15.233	17.2241	20.0039	15.1414	18.6821
Gm10941	10;10	77257776;77258727	77257986;77259223	-;-	708	1.03342	1.45596	1.31603	0.94441	1.56481	0.823884	0.680458	0.829305	1.20075	1.39144	1.14022	1.42064
Pofut2	10;10;10;10;10;10;10;10;10	77259300;77260574;77262437;77263265;77264956;77265836;77266913;77267184;77268527	77259453;77260824;77262581;77263375;77265022;77265961;77267093;77267307;77269586	+;+;+;+;+;+;+;+;+	2219	51.0491	52.0894	47.353	47.934	45.6154	46.6292	40.1217	36.3723	48.5117	53.5838	42.1328	48.0262
Adarb1	10;10;10;10;10;10;10;10;10;10;10;10;10;10;10;10;10;10;10;10;10;10;10;10;10;10;10;10;10;10;10;10;10;10;10;10;10;10;10;10;10;10;10;10;10;10;10;10;10;10;10;10;10;10;10;10;10;10;10;10;10;10;10;10;10;10;10;10;10;10;10;10;10;10;10;10;10;10;10;10;10;10;10;10;10;10;10;10;10;10;10;10;10;10;10	77290726;77290726;77290727;77290727;77290727;77290728;77295698;77295698;77295698;77295698;77295698;77295698;77303173;77303173;77303173;77303173;77303173;77303173;77311106;77311106;77311106;77311106;77311106;77311106;77312348;77312348;77312348;77312378;77312378;77312378;77313405;77313405;77313405;77313405;77313405;77313405;77316110;77316124;77317236;77317236;77317236;77317236;77317236;77317236;773…	77294961;77294961;77294961;77294961;77294961;77294961;77295876;77295876;77295876;77295876;77295876;77295876;77303354;77303354;77303354;77303354;77303354;77303354;77311274;77311274;77311274;77311274;77311274;77311274;77312526;77312526;77312526;77312526;77312526;77312526;77313573;77313573;77313573;77313573;77313573;77313573;77317350;77317350;77317350;77317350;77317350;77317350;77317350;77317350;773…	-;-;-;-;-;-;-;-;-;-;-;-;-;-;-;-;-;-;-;-;-;-;-;-;-;-;-;-;-;-;-;-;-;-;-;-;-;-;-;-;-;-;-;-;-;-;-;-;-;-;-;-;-;-;-;-;-;-;-;-;-;-;-;-;-;-;-;-;-;-;-;-;-;-;-;-;-;-;-;-;-;-;-;-;-;-;-;-;-;-;-;-;-;-;-	11272	1.38601	2.493	1.4165	2.73779	1.84511	1.49275	1.46171	1.53462	1.43297	1.57695	1.15484	1.20056
Fam207a	10;10;10;10;10;10	77486656;77489998;77497363;77503846;77514306;77515603	77488473;77490066;77497513;77503914;77514414;77515813	-;-;-;-;-;-	2427	15.3038	15.3826	14.0651	16.5089	16.2674	15.5113	15.9397	15.632	15.4342	15.301	14.8225	16.7277
Itgb2	10;10;10;10;10;10;10;10;10;10;10;10;10;10;10;10;10;10;10;10;10;10;10;10;10;10;10;10;10;10;10;10;10;10;10;10;10;10;10;10;10;10;10;10;10;10;10;10;10;10;10;10;10	77530252;77530347;77530370;77530374;77530380;77541966;77541966;77541966;77541966;77542398;77542398;77542398;77546013;77546013;77546013;77546013;77546013;77547126;77547126;77547126;77547126;77547126;77548546;77548546;77548546;77548546;77549946;77549946;77549946;77550973;77550973;77550973;77556088;77556088;77556088;77557390;77557390;77557390;77557952;77557952;77559479;77560150;77560150;77560150;775…	77530459;77530459;77530459;77530459;77530459;77542026;77542026;77542026;77542026;77542486;77542546;77542486;77546193;77546193;77546193;77546193;77546193;77547296;77547296;77547296;77547195;77547296;77548787;77548787;77548672;77548787;77550101;77550101;77550101;77551068;77551068;77551068;77556177;77556177;77556177;77557530;77557530;77557530;77558139;77558139;77559723;77560372;77560372;77560372;775…	+;+;+;+;+;+;+;+;+;+;+;+;+;+;+;+;+;+;+;+;+;+;+;+;+;+;+;+;+;+;+;+;+;+;+;+;+;+;+;+;+;+;+;+;+;+;+;+;+;+;+;+;+	3052	3.41264	3.39221	3.46923	4.04462	1.99652	2.79335	1.9258	2.63414	3.79521	2.18933	2.79386	6.7859
Pttg1ip	10;10;10;10;10;10;10;10;10;10;10;10;10;10;10;10;10;10;10;10;10;10;10;10;10;10;10;10;10;10;10;10;10;10;10;10;10;10;10;10	77581720;77581756;77581758;77581803;77581822;77582409;77583945;77586325;77586380;77587251;77587251;77587251;77587251;77587251;77587251;77589394;77589634;77589634;77589634;77589634;77589634;77592337;77592846;77592846;77592846;77592846;77592846;77592846;77592846;77593864;77593864;77593864;77593864;77593864;77593864;77597028;77597028;77597028;77597028;77597028	77581927;77581927;77581927;77581927;77581927;77582506;77584023;77586404;77586404;77587303;77587429;77587303;77587303;77587303;77587303;77589742;77589742;77589742;77589742;77589742;77589742;77593017;77593017;77592999;77592911;77593017;77593017;77593017;77593017;77593910;77593910;77593910;77593910;77593910;77593899;77597232;77597130;77597269;77597335;77598732	+;+;+;+;+;+;+;+;+;+;+;+;+;+;+;+;+;+;+;+;+;+;+;+;+;+;+;+;+;+;+;+;+;+;+;+;+;+;+;+	3426	38.8932	40.3443	46.7656	41.8258	45.3902	45.4593	38.4596	34.4078	44.5256	40.3444	36.4641	37.5384
Sumo3	10;10;10;10;10;10;10;10;10;10;10;10;10;10;10;10;10;10;10;10;10;10;10;10;10;10;10;10;10;10;10;10;10;10	77606097;77606197;77606209;77606225;77606225;77606571;77609812;77609812;77609812;77609812;77609812;77609812;77609838;77613709;77613980;77613980;77613980;77613980;77613980;77613980;77613980;77615133;77615638;77615927;77616148;77616148;77616148;77616148;77616148;77616190;77616642;77630726;77630849;77641460	77606341;77606341;77606341;77606341;77606350;77606968;77609940;77609940;77609940;77609940;77609940;77609940;77609944;77613811;77614051;77614051;77614051;77614051;77614051;77614051;77614051;77615225;77616060;77616034;77617422;77616748;77616307;77616710;77618331;77616643;77616898;77630761;77630894;77641543	+;+;+;+;+;+;+;+;+;+;+;+;+;+;+;+;+;+;+;+;+;+;+;+;+;+;+;+;+;+;+;+;+;+	3826	22.2281	21.2143	21.4751	22.0604	22.7969	23.467	23.9119	22.6534	20.0672	21.64	22.036	25.3209
Ube2g2	10;10;10;10;10;10;10;10;10;10;10;10;10;10;10;10;10;10;10;10;10;10;10	77622275;77622313;77622323;77622378;77630726;77630726;77630726;77630849;77630849;77630849;77634660;77641186;77641460;77641460;77641460;77643469;77643469;77643469;77643469;77644447;77644447;77644447;77644447	77622416;77622416;77622416;77622416;77630761;77630761;77630761;77630894;77630894;77630894;77634785;77641578;77641500;77641578;77641578;77643609;77643609;77643609;77643609;77644508;77644559;77645993;77644486	+;+;+;+;+;+;+;+;+;+;+;+;+;+;+;+;+;+;+;+;+;+;+	2431	8.69273	8.07504	8.46699	7.61672	7.3953	7.16148	8.18465	8.10038	7.38747	7.48816	7.72075	8.76384
Tspear	10;10;10;10;10;10;10;10;10;10;10;10;10;10;10;10;10;10;10;10;10;10;10;10;10	77686569;77829467;77864582;77864623;77864644;77866280;77866280;77866280;77867672;77867672;77867672;77869563;77869563;77870323;77870323;77873094;77873094;77874885;77874885;77881062;77881062;77883441;77883441;77886427;77886427	77686897;77829687;77864882;77864882;77864882;77866370;77866370;77866370;77868001;77867828;77867828;77869694;77869694;77870549;77870549;77873280;77873280;77875114;77875114;77881249;77881249;77883542;77883542;77887021;77886769	+;+;+;+;+;+;+;+;+;+;+;+;+;+;+;+;+;+;+;+;+;+;+;+;+	2933	0.102718	0.0458421	0.0866397	0.0701453	0.0343392	0.0764916	0.049277	0.107793	0.0543467	0.0292071	0	0.0935261
Gm7137	10	77787490	77788200	-	711	0	0	0	0	0	0	0	0	0	0.0602423	0	0
Gm19668	10	77798387	77799133	-	747	0	0	0.0566966	0	0	0	0	0	0	0	0	0
Lrrc3	10;10	77897575;77902399	77901732;77902536	-;-	4296	0.330605	0.32341	0.354908	0.598627	0.421998	0.532674	0.493427	0.304886	0.408144	0.408781	0.317104	0.340549
Trpm2	10;10;10;10;10;10;10;10;10;10;10;10;10;10;10;10;10;10;10;10;10;10;10;10;10;10;10;10;10;10;10;10;10;10;10;10;10;10;10;10;10;10;10;10;10;10;10;10;10;10;10;10;10;10;10;10;10;10;10;10;10;10;10;10;10;10;10;10;10;10;10;10;10;10;10;10;10;10;10;10;10;10;10;10;10;10;10;10;10;10;10;10;10;10;10;10;10;10;10;10;10;10;10;10;10;10;10;10;10;10;10;10;10;10;10;10;10;10;10;10;10;10;10;10;10;10;10;10;10	77907722;77909165;77909303;77909361;77911289;77911289;77911289;77911289;77912578;77912578;77912578;77912578;77913805;77913805;77913805;77913805;77914712;77914712;77914712;77916058;77917289;77917707;77917707;77917707;77917707;77918080;77918080;77918080;77918080;77918080;77918080;77918865;77918865;77918865;77918865;77918865;77918865;77919618;77919618;77919618;77919618;77919618;77919618;77920445;779…	77910322;77910322;77910322;77910322;77911405;77911405;77911405;77911405;77912679;77912679;77912679;77912679;77914798;77913910;77913910;77913910;77914798;77914798;77914798;77917808;77917808;77917808;77917808;77917808;77917808;77918153;77918153;77918153;77918153;77918153;77918153;77919022;77919022;77919022;77919022;77919022;77919022;77919705;77919705;77919705;77919705;77919705;77919705;77920532;779…	-;-;-;-;-;-;-;-;-;-;-;-;-;-;-;-;-;-;-;-;-;-;-;-;-;-;-;-;-;-;-;-;-;-;-;-;-;-;-;-;-;-;-;-;-;-;-;-;-;-;-;-;-;-;-;-;-;-;-;-;-;-;-;-;-;-;-;-;-;-;-;-;-;-;-;-;-;-;-;-;-;-;-;-;-;-;-;-;-;-;-;-;-;-;-;-;-;-;-;-;-;-;-;-;-;-;-;-;-;-;-;-;-;-;-;-;-;-;-;-;-;-;-;-;-;-;-;-;-	12323	0.195583	0.210944	0.158095	0.204517	0.126683	0.120158	0.203293	0.183256	0.168156	0.194645	0.180152	0.489724
1810043G02Rik	10;10;10;10;10;10;10;10;10;10;10;10;10;10;10;10;10;10;10;10;10;10;10;10;10;10;10;10;10;10;10;10;10;10;10;10;10;10;10	77978524;77978654;77978671;77978673;77978681;77978693;77979753;77979753;77979753;77979753;77979753;77980493;77980501;77980501;77980501;77981584;77981584;77981584;77981584;77981762;77982550;77982870;77982870;77982870;77982870;77982870;77983516;77983516;77983516;77983516;77983516;77983516;77983945;77984419;77984419;77984419;77984419;77985039;77986718	77978781;77978781;77978781;77978781;77983041;77978781;77980051;77983041;77980547;77979771;77979771;77980547;77980522;77980547;77980547;77981813;77981813;77981813;77981813;77981813;77982686;77982894;77983041;77983041;77983041;77983041;77983591;77985436;77983591;77983591;77983591;77983591;77984005;77984479;77985434;77985255;77985434;77985096;77986905	+;+;+;+;+;+;+;+;+;+;+;+;+;+;+;+;+;+;+;+;+;+;+;+;+;+;+;+;+;+;+;+;+;+;+;+;+;+;+	6627	2.72767	2.40762	2.26876	2.66988	2.39368	2.54581	2.71888	2.69206	2.38124	2.25569	2.86268	2.46289
Pfkl	10;10;10;10;10;10;10;10;10;10;10;10;10;10;10;10;10;10;10;10;10;10;10;10;10;10;10;10;10;10;10;10	77986947;77988675;77988865;77989566;77989890;77990142;77990463;77990672;77991354;77991354;77992016;77992016;77992392;77993382;77994136;77995244;77996320;77997237;77997524;77999826;77999826;78000135;78000676;78000680;78001311;78001311;78002010;78002010;78005441;78005441;78009599;78010005	77988357;77988780;77988964;77989677;77989951;77990306;77990824;77990824;77991441;77991441;77992176;77992086;77992538;77993445;77994200;77995369;77996412;77997619;77997619;77999934;77999934;78000179;78000841;78000841;78001500;78001500;78002087;78002087;78005514;78005514;78009807;78010083	-;-;-;-;-;-;-;-;-;-;-;-;-;-;-;-;-;-;-;-;-;-;-;-;-;-;-;-;-;-;-;-	4395	13.7097	12.8081	16.5844	12.405	10.5071	14.5789	13.8446	10.6773	13.649	12.0067	14.4419	15.614
Aire	10;10;10;10;10;10;10;10;10;10;10;10;10;10;10;10;10;10;10;10;10;10;10;10;10;10;10;10;10;10;10;10;10;10;10;10;10;10;10;10;10;10;10;10;10;10;10;10;10;10;10;10;10;10;10;10;10;10;10;10;10;10;10;10;10;10;10;10;10;10;10;10;10;10;10;10;10;10;10;10;10;10;10;10;10;10;10;10;10;10;10;10;10;10;10;10;10;10;10;10;10;10;10;10;10;10;10;10;10;10;10;10;10;10;10;10;10;10;10;10;10;10;10;10;10;10;10;10;10;10;10;10;10;…	78030022;78030022;78030022;78030023;78030023;78030031;78030031;78030031;78030031;78030031;78030031;78030031;78030071;78030071;78031821;78031821;78031821;78031821;78031821;78031821;78031821;78031821;78031821;78031821;78031821;78031821;78031821;78031821;78031855;78034381;78034381;78034381;78034381;78034381;78034381;78034381;78034381;78034381;78034381;78034381;78034381;78034381;78034381;78034381;780…	78030324;78030324;78030324;78030324;78030324;78030324;78030324;78030324;78030324;78030324;78030324;78030324;78030324;78030324;78031889;78031889;78031889;78031889;78031889;78031889;78031889;78031889;78031889;78031889;78031889;78031889;78031889;78031889;78031889;78034489;78034489;78034489;78034489;78034489;78034489;78034489;78034489;78034489;78034489;78034489;78034489;78034489;78034489;78034489;780…	-;-;-;-;-;-;-;-;-;-;-;-;-;-;-;-;-;-;-;-;-;-;-;-;-;-;-;-;-;-;-;-;-;-;-;-;-;-;-;-;-;-;-;-;-;-;-;-;-;-;-;-;-;-;-;-;-;-;-;-;-;-;-;-;-;-;-;-;-;-;-;-;-;-;-;-;-;-;-;-;-;-;-;-;-;-;-;-;-;-;-;-;-;-;-;-;-;-;-;-;-;-;-;-;-;-;-;-;-;-;-;-;-;-;-;-;-;-;-;-;-;-;-;-;-;-;-;-;-;-;-;-;-;-;-;-;-;-;-;-;-;-;-;-;-;-;-;-;-;-;-;-;-;-;-;-;-;-;-;-;-;-;-;-;-;-;-;-;-;-;-;-;-;-;-;-;-;-;-;-;-;-;-;-;-;-;-;-	3825	0.416323	0.480405	0.542553	0.457191	0.263312	0.187691	0.44083	0.460508	0.388947	0.347137	0.34296	0.430293
Dnmt3l	10;10;10;10;10;10;10;10;10;10;10;10;10;10;10;10;10;10;10;10;10;10;10;10;10;10;10;10;10;10;10;10;10;10;10;10;10;10;10;10;10;10;10;10;10;10;10;10;10;10;10;10;10;10;10;10;10;10;10;10;10	78041947;78042287;78045875;78045875;78049842;78049959;78050016;78050016;78050598;78050598;78050598;78050916;78050916;78050916;78051831;78051831;78051831;78051992;78051992;78051992;78052712;78052712;78052712;78053929;78053929;78053929;78054835;78054972;78054972;78054972;78055335;78055335;78055335;78056412;78056585;78056845;78056845;78056845;78056845;78056845;78056845;78056845;78057268;78057268;780…	78042127;78042388;78045903;78045988;78049911;78050203;78050203;78050203;78050684;78050684;78050684;78050960;78050960;78050960;78051910;78051910;78051910;78052104;78052104;78052104;78052883;78052883;78052883;78054016;78054016;78054016;78055066;78055066;78055066;78055066;78055716;78055716;78055716;78056750;78056750;78056920;78056920;78056920;78056920;78056920;78056920;78056920;78057368;78057407;780…	+;+;+;+;+;+;+;+;+;+;+;+;+;+;+;+;+;+;+;+;+;+;+;+;+;+;+;+;+;+;+;+;+;+;+;+;+;+;+;+;+;+;+;+;+;+;+;+;+;+;+;+;+;+;+;+;+;+;+;+;+	2988	1.498	1.30495	1.53081	1.22216	1.12919	1.42659	1.75744	1.9499	0.978017	1.3188	1.26643	1.72899
Icosl	10;10;10;10;10;10;10	78069360;78071161;78071738;78073707;78075205;78077144;78077893	78069535;78071279;78072091;78074000;78075354;78077173;78079525	+;+;+;+;+;+;+	2756	13.1646	10.7655	7.92954	11.6081	7.72919	8.33579	16.5716	15.7652	8.77196	9.66679	9.83098	13.3042
D10Jhu81e	10;10;10;10;10;10;10	78162067;78163397;78164838;78167395;78168809;78169373;78169595	78162718;78163553;78164930;78167514;78168922;78169425;78169768	-;-;-;-;-;-;-	1363	41.1442	35.9401	37.7225	40.868	43.6711	43.224	39.8348	37.5769	45.0247	39.7526	42.533	38.8424
Pwp2	10;10;10;10;10;10;10;10;10;10;10;10;10;10;10;10;10;10;10;10;10	78170910;78173381;78173573;78173833;78174931;78175486;78176253;78176956;78177750;78178166;78178428;78178961;78179715;78180126;78181049;78181511;78182386;78182623;78182946;78184058;78185071	78172134;78173455;78173723;78174051;78174996;78175594;78176400;78177136;78177900;78178313;78178576;78179097;78179785;78180269;78181278;78181646;78182529;78182722;78183040;78184170;78185149	-;-;-;-;-;-;-;-;-;-;-;-;-;-;-;-;-;-;-;-;-	3871	7.29357	7.43305	6.83809	6.51064	6.01023	7.27935	8.63716	9.13572	7.11002	7.04835	7.10354	8.00756
Trappc10	10;10;10;10;10;10;10;10;10;10;10;10;10;10;10;10;10;10;10;10;10;10;10	78186725;78188756;78193359;78196288;78197738;78199044;78200618;78201432;78202880;78203881;78207434;78207892;78209384;78210378;78210764;78211476;78214568;78217150;78220189;78222664;78228779;78231454;78244436	78188094;78188950;78193536;78196458;78197864;78199144;78200847;78201590;78203021;78204392;78207546;78208032;78209475;78210454;78210878;78211622;78214815;78217261;78220384;78222860;78228914;78231535;78244642	-;-;-;-;-;-;-;-;-;-;-;-;-;-;-;-;-;-;-;-;-;-;-	5048	5.40542	5.53126	4.84099	5.01298	5.29722	5.58208	5.25856	4.37516	4.45231	4.98918	4.34782	4.91784
Agpat3	10;10;10;10;10;10;10;10;10;10;10;10;10;10;10;10;10;10;10;10;10;10;10;10;10;10;10;10;10;10;10;10;10;10;10;10;10;10;10;10;10;10;10;10;10;10;10;10;10;10;10;10;10;10;10;10;10;10;10;10;10;10;10;10;10;10;10;10;10;10;10;10;10;10;10;10;10;10;10	78269178;78271563;78271563;78271563;78271563;78273611;78273614;78274072;78274072;78274072;78274072;78274072;78274072;78274072;78278010;78278010;78278010;78278010;78278010;78278010;78278010;78282374;78282374;78282374;78282374;78282374;78282374;78283095;78283095;78283095;78283095;78283095;78283095;78284189;78284189;78284189;78284189;78284189;78284189;78284267;78284313;78284995;78284995;78284995;782…	78273775;78273775;78273775;78273775;78273775;78273775;78273775;78274270;78274270;78274270;78274270;78274270;78274270;78274270;78278436;78278085;78278085;78278085;78278085;78278085;78278085;78282476;78282476;78282476;78282476;78282476;78282476;78283248;78283248;78283248;78283248;78283248;78283248;78284350;78284350;78284350;78284350;78284350;78284350;78284350;78284350;78285164;78285164;78285164;782…	-;-;-;-;-;-;-;-;-;-;-;-;-;-;-;-;-;-;-;-;-;-;-;-;-;-;-;-;-;-;-;-;-;-;-;-;-;-;-;-;-;-;-;-;-;-;-;-;-;-;-;-;-;-;-;-;-;-;-;-;-;-;-;-;-;-;-;-;-;-;-;-;-;-;-;-;-;-;-	7577	11.9397	12.67	13.5156	13.5221	16.3231	14.7869	12.3159	11.868	12.994	13.9232	12.7319	12.8522
Gm10146	10	78393309	78393756	+	448	11.6243	8.60351	10.3045	10.2179	11.2407	10.8169	10.9687	12.1986	11.7414	10.6125	13.7399	10.8174
Rrp1	10;10;10;10;10;10;10;10;10;10;10;10;10	78400362;78401850;78402425;78402610;78403505;78404925;78405415;78405566;78408413;78409134;78410966;78411404;78412820	78400984;78401966;78402444;78402707;78403584;78405286;78405479;78405695;78408474;78409219;78411023;78411486;78413043	-;-;-;-;-;-;-;-;-;-;-;-;-	2008	299.621	282.436	293.45	289.982	278.527	281.666	306.357	293.664	317.448	288.307	281.772	310.696
Cstb	10;10;10	78425670;78426927;78427311	78425857;78427028;78427619	+;+;+	599	22.1301	21.2494	31.6759	23.8709	20.9337	28.0156	19.4636	19.6043	36.3682	18.3056	22.1529	21.6
Pdxk	10;10;10;10;10;10;10;10;10;10;10;10;10;10;10;10;10;10;10;10;10	78436744;78440697;78441137;78443781;78443781;78444983;78444983;78446950;78446950;78447895;78447895;78449230;78449230;78450283;78450283;78451479;78451479;78453474;78453474;78464761;78464761	78440913;78440913;78441203;78443917;78443917;78445094;78445094;78446995;78446995;78447980;78447980;78449276;78449276;78450366;78450366;78451583;78451583;78453528;78453528;78464853;78464975	-;-;-;-;-;-;-;-;-;-;-;-;-;-;-;-;-;-;-;-;-	5124	2.43584	2.003	2.48791	1.99754	1.92628	2.87224	2.28471	2.18598	2.33312	2.3322	2.02843	2.6232
Gm9978	10	78484570	78487842	-	3273	0	0	0.0129399	0	0	0	0	0.0137993	0	0	0	0
Ilvbl	10;10;10;10;10;10;10;10;10;10;10;10;10;10;10;10	78574500;78575087;78576582;78576900;78577111;78577342;78579021;78579463;78579666;78581056;78583015;78583220;78583464;78583630;78583878;78584070	78574665;78575231;78576783;78577027;78577249;78577453;78579120;78579560;78579802;78581190;78583129;78583389;78583534;78583701;78583983;78584498	+;+;+;+;+;+;+;+;+;+;+;+;+;+;+;+	2325	4.33164	5.26254	4.37186	4.80051	6.84442	4.99842	4.91089	3.96288	4.11352	4.99249	4.5572	4.24741
Syde1	10;10;10;10;10;10;10;10	78584503;78586090;78586959;78587331;78588707;78589101;78589902;78591802	78585911;78586315;78587119;78587457;78588921;78589745;78590243;78591964	-;-;-;-;-;-;-;-	3288	16.2442	15.8663	14.8774	17.8017	16.8474	16.5943	18.7841	18.0496	15.3355	16.0751	14.6699	16.7691
Olfr1357	10;10;10;10;10;10;10;10;10	78611003;78611003;78611003;78611669;78613416;78613416;78617900;78617900;78618025	78612653;78612653;78612653;78612680;78613875;78613875;78618074;78618074;78618074	-;-;-;-;-;-;-;-;-	2313	0.0186073	0	0	0	0	0	0	0	0	0	0	0
Casp14	10;10;10;10;10;10;10	78711997;78713990;78714248;78714935;78715261;78715820;78718107	78713441;78714093;78714397;78715160;78715410;78715886;78718293	-;-;-;-;-;-;-	2329	0	0.0192436	0	0.0883367	0	0	0.0206855	0.0775701	0	0.0551725	0.064991	0.0196302
Ccdc105	10;10;10;10;10;10;10	78746924;78748251;78748443;78748646;78749127;78750541;78752405	78747297;78748364;78748538;78748812;78749325;78750645;78753067	-;-;-;-;-;-;-	1718	0.826705	0.652187	0.912129	0.688581	0.556933	0.86188	0.981476	1.28818	0.711326	0.648218	1.02789	0.718512
Slc1a6	10;10;10;10;10;10;10;10;10;10	78780496;78787762;78788959;78791165;78793290;78795924;78800029;78801802;78812802;78814420	78780681;78787964;78789096;78791369;78793332;78796267;78800262;78801996;78812936;78814825	+;+;+;+;+;+;+;+;+;+	2089	0.88591	0.665087	1.0948	0.886369	0.771408	1.22431	1.06085	1.18913	0.991951	0.738134	0.893645	1.02862
Olfr57	10;10;10	79028741;79034723;79034785	79028897;79035802;79036274	+;+;+	1709	0	0	0	0	0	0	0	0	0	0.0250628	0	0
2610008E11Rik	10;10;10;10;10;10	79064374;79068634;79088287;79092412;79094431;79097458	79068051;79068728;79088379;79092504;79094557;79097600	-;-;-;-;-;-	4229	12.7315	11.2125	11.7473	11.8947	10.1336	12.3926	14.3994	16.3402	11.3453	12.6096	16.8819	13.4161
Vmn2r80	10;10;10;10;10;10	79148797;79168170;79169038;79171509;79181988;79194011	79149030;79168461;79169847;79171736;79182111;79195012	+;+;+;+;+;+	2690	0	0	0	0	0	0	0	0	0	0.0159228	0.0187564	0
Vmn2r83	10;10;10;10;10;10	79468943;79477775;79478427;79480086;79481467;79491226	79469172;79478066;79479233;79480313;79481590;79492154	+;+;+;+;+;+	2610	0	0	0.0324539	0	0	0.0515747	0	0	0	0	0	0
Plpp2	10;10;10;10;10;10;10;10;10;10;10;10;10;10;10;10;10;10;10;10;10;10	79526430;79526430;79526435;79527450;79527450;79527450;79527487;79527815;79527815;79527815;79527815;79530498;79530498;79530498;79530498;79530877;79530877;79530877;79533624;79533624;79533624;79533665	79527248;79527248;79527248;79527626;79527626;79527626;79527626;79527872;79527872;79527872;79527872;79530772;79530772;79530772;79530772;79531028;79530981;79531028;79533772;79533760;79533787;79533742	-;-;-;-;-;-;-;-;-;-;-;-;-;-;-;-;-;-;-;-;-;-	1645	1.38666	1.66196	1.59626	1.53208	1.1633	2.42762	1.28861	1.34535	1.84108	1.11963	1.34955	1.41742
Mier2	10;10;10;10;10;10;10;10;10;10;10;10;10;10;10;10;10;10;10;10;10;10;10;10;10;10;10;10;10;10;10;10;10;10;10;10;10;10;10;10;10;10;10;10;10;10;10;10;10;10;10;10;10;10;10;10;10;10;10;10;10;10;10;10	79540245;79540245;79540246;79540863;79540921;79541514;79541514;79541514;79541514;79541668;79542405;79542405;79542467;79542597;79542597;79542597;79542597;79544081;79544520;79544520;79544520;79544689;79544689;79544689;79545045;79545045;79547655;79547655;79548354;79548354;79548786;79548786;79548802;79548874;79548881;79548906;79549184;79549184;79549184;79549184;79549184;79549184;79549537;79549537;795…	79541199;79541199;79540861;79541199;79541199;79542165;79541960;79541934;79541934;79542481;79542481;79542481;79542481;79542721;79542721;79542721;79542721;79544352;79544614;79544614;79544614;79544770;79544770;79544770;79545196;79545196;79547724;79547724;79548442;79548442;79548909;79548903;79548903;79548903;79548909;79548909;79549309;79549309;79549309;79549309;79549309;79549309;79549679;79549679;795…	-;-;-;-;-;-;-;-;-;-;-;-;-;-;-;-;-;-;-;-;-;-;-;-;-;-;-;-;-;-;-;-;-;-;-;-;-;-;-;-;-;-;-;-;-;-;-;-;-;-;-;-;-;-;-;-;-;-;-;-;-;-;-;-	4497	7.13963	6.59767	6.46069	7.01113	6.25982	6.5953	7.43484	7.4723	6.98279	6.42913	6.18202	7.11654
Theg	10;10;10;10;10;10;10;10;10;10;10;10;10;10;10;10;10	79576379;79576477;79576477;79579939;79579939;79579939;79583738;79583738;79584691;79584691;79585393;79585393;79585904;79586231;79586231;79586780;79586780	79576766;79576766;79576766;79580120;79580098;79580098;79583855;79583855;79584760;79584760;79585454;79585454;79585975;79586350;79586350;79587331;79587136	-;-;-;-;-;-;-;-;-;-;-;-;-;-;-;-;-	1564	0	0	0.054159	0	0	0	0.0308034	0	0	0	0	0
C2cd4c	10;10;10;10	79606857;79606857;79613757;79613890	79613338;79613338;79614018;79614025	-;-;-;-	6751	0.0255007	0.0531101	0.0188205	0.0533311	0.0447565	0.0332321	0.035681	0.0602114	0.0393519	0.0507567	0.0373683	0.0203164
Shc2	10;10;10;10;10;10;10;10;10;10;10;10;10;10;10;10;10;10;10;10;10;10;10;10;10;10;10;10;10;10;10	79617940;79618051;79618652;79620091;79621054;79621054;79621054;79621054;79622255;79622255;79622255;79623827;79623827;79626093;79626093;79626255;79626255;79626800;79626800;79627020;79627020;79627195;79627195;79629823;79629823;79630068;79630068;79631265;79631265;79637449;79637449	79620099;79620099;79620099;79620099;79622724;79621187;79621187;79621187;79623080;79622565;79622565;79623991;79623991;79626156;79626156;79626420;79626420;79626926;79626926;79627071;79627071;79627248;79627248;79629942;79629942;79630128;79630128;79631335;79631335;79637918;79637918	-;-;-;-;-;-;-;-;-;-;-;-;-;-;-;-;-;-;-;-;-;-;-;-;-;-;-;-;-;-;-	5537	1.10376	1.48126	1.29268	1.29119	1.00044	1.51539	1.20071	1.36222	1.31465	1.24544	1.12992	1.08166
Odf3l2	10;10;10;10	79639526;79642580;79644614;79645567	79640379;79642693;79644721;79645738	-;-;-;-	1248	0	0	0	0	0	0	0	0.0361901	0	0	0	0.0366336
Madcam1	10;10;10;10;10	79664574;79664912;79665431;79666339;79668237	79664667;79665178;79665757;79666770;79668536	+;+;+;+;+	1420	0.030309	0.0631244	0.0894768	0.0724423	0.106391	0.0631972	0.135708	0.0318065	0.0374176	0.0301636	0.106594	0
Tpgs1	10;10	79669410;79675400	79669783;79676126	+;+	1101	6.6454	6.92017	6.57789	6.35334	6.54066	6.64288	5.86344	5.49695	8.01097	6.65243	6.2782	6.68547
Cdc34	10;10;10;10;10;10;10;10;10;10;10	79682195;79682304;79682400;79684818;79684818;79685005;79685005;79685233;79685233;79687849;79687849	79682590;79682324;79682590;79684904;79684904;79685102;79685102;79685367;79685367;79688394;79688394	+;+;+;+;+;+;+;+;+;+;+	1262	11.8339	11.755	12.7527	9.5369	11.3726	10.4175	11.7578	11.2376	14.1463	12.3202	10.1149	11.9912
Gzmm	10;10;10;10;10;10;10;10;10	79689020;79692821;79693758;79694124;79694124;79694351;79694351;79694987;79694987	79689465;79692980;79693942;79694262;79694262;79694617;79694617;79695261;79695260	+;+;+;+;+;+;+;+;+	1472	0.350859	0.487156	0.28772	0.349416	0.342109	0.39627	0.327286	0.644341	0.433149	0.523764	0.377039	0.403765
Bsg	10;10;10;10;10;10;10;10;10;10;10;10;10;10;10;10;10;10;10;10;10;10;10;10;10;10;10;10;10;10;10;10;10;10;10;10;10;10	79704491;79704500;79704508;79704570;79708697;79709598;79709671;79709671;79709671;79709671;79710058;79710058;79710058;79710058;79710058;79710105;79710260;79710260;79710260;79710260;79710260;79710625;79710625;79710638;79710638;79710638;79710638;79710840;79711256;79711256;79711256;79711256;79711256;79711494;79711494;79711494;79711494;79711494	79704584;79704584;79704584;79704584;79709044;79709827;79709827;79709827;79709827;79709827;79710140;79710140;79710140;79710140;79710140;79710402;79710402;79710402;79710402;79710402;79710402;79710728;79710920;79710920;79710724;79710920;79710920;79710920;79711280;79711280;79711280;79711280;79711280;79711710;79711969;79711823;79711895;79711969	+;+;+;+;+;+;+;+;+;+;+;+;+;+;+;+;+;+;+;+;+;+;+;+;+;+;+;+;+;+;+;+;+;+;+;+;+;+	1814	272.349	248.601	280.38	269.164	275.944	290.196	251.691	228.59	315.869	275.057	283.231	256.544
Hcn2	10;10;10;10;10;10;10;10;10;10;10;10;10;10;10;10;10	79716634;79716634;79724388;79724388;79726147;79726147;79728893;79728893;79730847;79730847;79733671;79733671;79734063;79734063;79734858;79734858;79735979	79717219;79717219;79724811;79724811;79726308;79726308;79729111;79729111;79730993;79730993;79733911;79733911;79734227;79734227;79735872;79736108;79736108	+;+;+;+;+;+;+;+;+;+;+;+;+;+;+;+;+	3195	0.484944	0.364719	0.596512	0.225376	0.630466	0.842629	0.648384	0.296861	0.731722	0.455805	0.615879	0.400664
Polrmt	10;10;10;10;10;10;10;10;10;10;10;10;10;10;10;10;10;10;10;10;10;10;10;10;10;10;10;10;10;10;10;10;10;10;10;10;10;10;10;10;10;10;10;10;10;10;10;10;10;10;10;10;10;10;10;10;10;10;10;10;10;10;10;10;10;10;10;10;10;10;10;10;10;10;10;10;10;10;10;10;10;10;10;10;10;10;10;10;10;10;10;10;10;10;10;10;10;10;10;10;10;10;10;10;10;10;10;10;10;10;10;10;10;10;10;10;10;10;10;10;10;10;10;10;10;10;10;10;10;10;10;10;10;…	79736123;79736127;79736128;79736129;79736130;79736130;79736172;79736173;79736174;79736207;79736367;79736367;79736367;79736367;79736367;79736367;79736367;79736367;79736367;79736523;79736523;79736523;79736523;79736523;79736523;79736523;79736523;79736523;79736577;79736734;79736734;79736734;79736734;79736734;79736734;79736734;79736734;79736734;79736734;79736734;79737264;79737264;79737264;79737264;797…	79736283;79736283;79736283;79736283;79736283;79736283;79736283;79736443;79736283;79736283;79736443;79736443;79736614;79736443;79736443;79736443;79736443;79736443;79736443;79736614;79736614;79736614;79736614;79736614;79736614;79736614;79736614;79736614;79736614;79736806;79736806;79736806;79736783;79736768;79736806;79736806;79736806;79736806;79736806;79736806;79737509;79737886;79737362;79737713;797…	-;-;-;-;-;-;-;-;-;-;-;-;-;-;-;-;-;-;-;-;-;-;-;-;-;-;-;-;-;-;-;-;-;-;-;-;-;-;-;-;-;-;-;-;-;-;-;-;-;-;-;-;-;-;-;-;-;-;-;-;-;-;-;-;-;-;-;-;-;-;-;-;-;-;-;-;-;-;-;-;-;-;-;-;-;-;-;-;-;-;-;-;-;-;-;-;-;-;-;-;-;-;-;-;-;-;-;-;-;-;-;-;-;-;-;-;-;-;-;-;-;-;-;-;-;-;-;-;-;-;-;-;-;-;-;-;-;-;-;-	4685	4.51057	4.86927	4.5652	4.32551	4.47153	4.68333	4.8125	4.70451	4.55912	4.08667	3.99545	5.01588
Fgf22	10;10;10	79755119;79756580;79756764	79755305;79756683;79756961	+;+;+	489	0.0880138	0	0	0	0	0.367035	0.0985204	0.0923624	0.108656	0.175183	0	0
Rnf126	10;10;10;10;10;10;10;10;10	79758515;79760791;79760989;79761430;79761565;79762085;79762482;79762647;79766753	79759236;79760906;79761082;79761499;79761633;79762329;79762545;79762705;79766952	-;-;-;-;-;-;-;-;-	1639	25.8653	26.4152	22.0677	25.0737	24.3957	24.2829	26.9541	25.5725	25.8695	25.1401	23.0263	27.3922
Fstl3	10;10;10;10;10;10;10;10;10;10	79777272;79777292;79778563;79778563;79779965;79780581;79781124;79781124;79781432;79781432	79777397;79777397;79779093;79778748;79780180;79780725;79781351;79781351;79782607;79782630	+;+;+;+;+;+;+;+;+;+	2445	1.285	1.19149	1.87078	1.45151	1.174	1.85352	1.33988	0.997514	2.4991	1.41898	1.50642	1.38371
Prss57	10;10;10;10;10;10;10;10;10;10;10;10;10;10;10	79781474;79781476;79782918;79783096;79784346;79784346;79784346;79784454;79785755;79785755;79787358;79787358;79788843;79788843;79790869	79783460;79783460;79783399;79783460;79784609;79784565;79784609;79784583;79785899;79785899;79787511;79787511;79789042;79788985;79790961	-;-;-;-;-;-;-;-;-;-;-;-;-;-;-	2843	0.575263	0.662107	0.893824	0.796025	0.495968	0.726	0.643934	0.571913	1.3643	0.542371	0.727627	0.659327
Palm	10;10;10;10;10;10;10;10;10;10;10;10;10;10;10;10;10	79793572;79793572;79806640;79806640;79807034;79807034;79807578;79807578;79809470;79809470;79812343;79812343;79815185;79815185;79816792;79819041;79819041	79793740;79793740;79806691;79806691;79807114;79807114;79807708;79807708;79809620;79809620;79812364;79812364;79815241;79815241;79816923;79820896;79820896	+;+;+;+;+;+;+;+;+;+;+;+;+;+;+;+;+	2651	26.3168	28.9772	36.6969	27.0848	27.5632	46.4102	26.9868	24.1245	38.3415	28.8565	28.1869	29.6283
Misp	10;10;10;10;10;10;10;10;10;10	79821021;79822627;79825696;79825696;79827878;79827878;79829393;79829393;79830011;79830011	79821093;79822686;79827434;79827434;79828011;79828011;79829431;79829431;79830452;79830452	+;+;+;+;+;+;+;+;+;+	2487	0.830663	1.4597	0.800387	0.620435	0.668207	0.956216	0.910452	0.926186	0.790479	0.998903	2.29247	0.882387
Ptbp1	10;10;10;10;10;10;10;10;10;10;10;10;10;10;10;10;10;10;10;10;10;10;10;10;10;10;10;10;10;10;10;10;10;10;10;10;10;10;10;10;10;10;10;10;10;10;10;10;10;10;10;10;10;10;10;10;10;10;10;10;10;10;10;10;10;10;10;10;10;10;10;10;10;10;10;10;10;10;10;10;10;10;10;10;10;10;10;10;10;10;10;10;10;10;10;10;10;10;10;10;10;10;10;10;10;10;10;10;10;10;10;10;10;10;10;10;10;10	79854427;79854605;79854629;79854633;79854641;79854652;79854665;79854667;79854667;79854668;79855038;79856339;79856504;79856504;79856504;79856504;79856504;79856504;79856504;79856504;79856504;79857579;79858752;79858752;79858752;79858752;79858752;79858752;79858752;79858752;79858752;79858752;79858752;79858772;79858952;79858952;79858952;79858952;79858952;79858952;79858952;79858952;79858952;79858952;798…	79854721;79854721;79854721;79854721;79854721;79854721;79854721;79854721;79854721;79854721;79855163;79856534;79856534;79856534;79856534;79856534;79856534;79856534;79856534;79856534;79856534;79857695;79858824;79858824;79858824;79859271;79858824;79858824;79858824;79858824;79858824;79858824;79858824;79858824;79859044;79859271;79859271;79859096;79858981;79859014;79858981;79859271;79859271;79859271;798…	+;+;+;+;+;+;+;+;+;+;+;+;+;+;+;+;+;+;+;+;+;+;+;+;+;+;+;+;+;+;+;+;+;+;+;+;+;+;+;+;+;+;+;+;+;+;+;+;+;+;+;+;+;+;+;+;+;+;+;+;+;+;+;+;+;+;+;+;+;+;+;+;+;+;+;+;+;+;+;+;+;+;+;+;+;+;+;+;+;+;+;+;+;+;+;+;+;+;+;+;+;+;+;+;+;+;+;+;+;+;+;+;+;+;+;+;+;+	4740	28.8378	33.018	27.7971	29.5908	31.9893	29.6767	30.0849	28.5379	26.3087	29.8832	26.0576	30.9035
Plppr3	10;10;10;10;10;10;10;10;10;10;10;10;10;10;10;10;10;10;10;10;10;10;10;10;10;10;10;10;10;10;10;10;10;10;10;10;10;10;10;10;10;10;10;10;10;10;10;10;10;10;10;10;10;10;10;10	79860475;79862435;79864781;79864781;79864781;79865788;79866412;79866412;79866412;79866412;79866412;79866432;79866438;79866668;79866668;79866668;79866668;79866668;79866668;79866835;79866835;79866835;79866835;79866835;79866835;79866835;79866854;79866908;79867172;79867172;79867172;79867172;79867172;79867388;79867388;79867388;79867388;79867388;79867388;79867388;79867388;79867459;79874020;79874020;798…	79861796;79862480;79866181;79866181;79866181;79866181;79866725;79866585;79866585;79866585;79866585;79866585;79866585;79866725;79866725;79866725;79866725;79866725;79866725;79867281;79867307;79867307;79866878;79867030;79867030;79867030;79867307;79866988;79867307;79867307;79867307;79867307;79867307;79867573;79867573;79867573;79867573;79867573;79867573;79867573;79867573;79867573;79874570;79874107;798…	-;-;-;-;-;-;-;-;-;-;-;-;-;-;-;-;-;-;-;-;-;-;-;-;-;-;-;-;-;-;-;-;-;-;-;-;-;-;-;-;-;-;-;-;-;-;-;-;-;-;-;-;-;-;-;-	4357	7.85306	7.21084	6.00729	7.48432	7.59365	6.00395	8.44774	8.55205	6.19499	6.74385	6.4154	7.74395
Prtn3	10;10;10;10;10;10;10;10;10;10;10;10;10;10;10;10;10;10;10	79874476;79879614;79880428;79880980;79881004;79881036;79881036;79881042;79881783;79881935;79881935;79881935;79881935;79881935;79882789;79882818;79882818;79882818;79882818	79874721;79879742;79880593;79881177;79881177;79881177;79881177;79881177;79882165;79882389;79882165;79882165;79882165;79882165;79882844;79883174;79882880;79883041;79883174	+;+;+;+;+;+;+;+;+;+;+;+;+;+;+;+;+;+;+	1732	0.173944	0.0517532	0.317887	0.148482	0.0581507	0.129532	0.25034	0.104308	0.122709	0.12365	0.116524	0.211172
Elane	10;10;10;10;10	79886312;79886714;79886983;79887566;79887917	79886398;79886870;79887124;79887799;79888216	+;+;+;+;+	920	0.0467812	0	0	0	0	0	0	0.0981852	0	0	0	0
Cfd	10;10;10;10;10	79890853;79891456;79891703;79891992;79892425	79890980;79891612;79891850;79892249;79892656	+;+;+;+;+	923	0.419663	0.582687	0.596512	0.445799	0.218238	1.75008	0.313173	0.342531	0.863483	1.85622	0.765294	0.594392
Med16	10;10;10;10;10;10;10;10;10;10;10;10;10;10;10;10;10;10;10;10;10;10;10;10;10;10;10;10;10;10;10;10;10;10;10;10;10;10;10;10;10;10;10;10;10;10;10;10;10;10;10;10;10	79894708;79894935;79895627;79895627;79896348;79896348;79896759;79896759;79897565;79897565;79898236;79898236;79898236;79898897;79898897;79898897;79899201;79899201;79899201;79900097;79900097;79901838;79902423;79902423;79902997;79902997;79902997;79903179;79903355;79903382;79906765;79906765;79906765;79906765;79906765;79906765;79907039;79907039;79907039;79907039;79907039;79907039;79907491;79907491;799…	79895410;79895410;79895710;79895710;79896564;79896564;79896951;79896951;79897698;79897698;79898446;79898446;79898446;79899103;79899103;79899103;79899685;79899409;79899409;79900252;79900252;79902528;79902528;79902528;79903428;79903428;79903428;79903428;79903428;79903428;79906934;79906934;79906934;79906934;79906934;79906934;79907146;79907146;79907146;79907146;79907146;79907146;79907656;79907656;799…	-;-;-;-;-;-;-;-;-;-;-;-;-;-;-;-;-;-;-;-;-;-;-;-;-;-;-;-;-;-;-;-;-;-;-;-;-;-;-;-;-;-;-;-;-;-;-;-;-;-;-;-;-	4663	5.05795	4.72885	5.22252	5.5813	5.54019	4.78241	5.36212	4.53299	4.81991	4.9602	4.5986	6.11805
R3hdm4	10;10;10;10;10;10;10;10;10;10;10;10;10;10;10;10;10	79910053;79910238;79910702;79911942;79911942;79912075;79912075;79912396;79912396;79912649;79912649;79913225;79913225;79913557;79913557;79916823;79916823	79911139;79910532;79911139;79911997;79911997;79912160;79912160;79912481;79912481;79912769;79912769;79913346;79913346;79913711;79913711;79917006;79916930	-;-;-;-;-;-;-;-;-;-;-;-;-;-;-;-;-	1897	36.0055	33.4543	34.9848	33.6748	33.7404	34.2024	31.2372	32.0228	33.3867	30.73	30.6399	34.8011
Gm26602	10	79910856	79911140	+	285	23.256	16.9838	19.913	21.2955	17.1396	19.6798	15.5517	18.0661	21.6261	17.1329	16.8182	15.2396
Kiss1r	10;10;10;10;10	79916971;79919427;79920695;79921015;79921552	79918917;79919551;79920830;79921247;79922273	+;+;+;+;+	3163	0.217711	0.170035	0.107119	0.113828	0.14329	0.184417	0.274163	0.18563	0.134386	0.257292	0.271176	0.130088
Arid3a	10;10;10;10;10;10;10;10;10;10;10;10;10;10;10;10;10;10;10;10;10;10;10;10;10;10;10;10;10;10;10;10;10;10;10;10	79927043;79927139;79927341;79930424;79930635;79930635;79930635;79930635;79931766;79931766;79931766;79946279;79946485;79946485;79946485;79946485;79948860;79948860;79948860;79948860;79949365;79949365;79949365;79949365;79950628;79950628;79950628;79950634;79951248;79951248;79951248;79951248;79951740;79951740;79951740;79951740	79927256;79927256;79927400;79930530;79931218;79931288;79931288;79931288;79932078;79932078;79932078;79946312;79946557;79946557;79946557;79946557;79949043;79949043;79949043;79949043;79949612;79949612;79949612;79949612;79950924;79950924;79950924;79950924;79951346;79951346;79951346;79951346;79952643;79954703;79954711;79955018	+;+;+;+;+;+;+;+;+;+;+;+;+;+;+;+;+;+;+;+;+;+;+;+;+;+;+;+;+;+;+;+;+;+;+;+	5562	1.66367	1.668	1.65998	2.03443	1.56635	1.83933	1.66305	1.52662	1.36606	1.62489	1.57841	2.02208
Wdr18	10;10;10;10;10;10;10;10;10;10	79960152;79961002;79964926;79965210;79965980;79966206;79966345;79966560;79967320;79967471	79960372;79961112;79965059;79965351;79966123;79966270;79966469;79966726;79967388;79969246	+;+;+;+;+;+;+;+;+;+	2954	7.18284	7.3888	6.73853	5.90255	6.51217	6.94163	6.55617	7.32368	7.2127	6.55389	6.88329	7.2277
Grin3b	10;10;10;10;10;10;10;10;10;10;10;10;10;10;10;10;10;10;10;10;10;10	79970715;79972844;79973681;79973737;79974409;79975634;79975634;79975634;79975861;79975861;79975861;79976054;79976054;79976054;79976394;79976394;79976394;79976635;79976635;79976635;79976792;79976792	79971325;79973436;79974713;79974713;79974713;79975779;79975779;79975779;79975976;79975976;79975976;79976117;79976205;79976205;79976558;79976558;79976558;79976702;79976715;79976702;79977124;79977190	+;+;+;+;+;+;+;+;+;+;+;+;+;+;+;+;+;+;+;+;+;+	3296	0.587604	1.12862	0.411188	0.686619	1.20701	0.598992	0.774682	0.822182	0.757661	1.11759	0.964395	0.846128
Tmem259	10;10;10;10;10;10;10;10;10;10;10;10;10;10;10;10;10;10;10;10;10;10;10;10;10;10;10;10;10;10;10;10;10	79974948;79975890;79977118;79977358;79977963;79977963;79977963;79977963;79977963;79978188;79978188;79978188;79978392;79978392;79978392;79978548;79978548;79978693;79978693;79978693;79978693;79978693;79978868;79978868;79978868;79979098;79979098;79979291;79979291;79979496;79979496;79983910;79983910	79977853;79977853;79977853;79977853;79978062;79978605;79978320;79978062;79978062;79978605;79978320;79978320;79978475;79978605;79978475;79978605;79978605;79978793;79978776;79978773;79978793;79978793;79978940;79978990;79978990;79979208;79979208;79979390;79979390;79979753;79979753;79984040;79984330	-;-;-;-;-;-;-;-;-;-;-;-;-;-;-;-;-;-;-;-;-;-;-;-;-;-;-;-;-;-;-;-;-	4663	7.43925	8.60227	7.23887	8.10723	8.74767	7.3805	7.84172	6.96414	7.67996	7.90877	6.92494	7.7456
Cnn2	10;10;10;10;10;10;10;10;10;10;10;10;10	79988584;79988623;79991360;79991360;79992273;79992273;79992443;79992443;79993214;79993428;79993428;79994351;79994351	79988740;79988740;79991481;79991481;79992339;79992339;79992580;79992580;79993330;79993574;79993574;79994684;79996062	+;+;+;+;+;+;+;+;+;+;+;+;+	2460	9.62248	10.6944	10.9324	11.834	13.736	12.1477	12.9646	11.2913	11.0154	12.188	10.6447	9.77562
Abca7	10;10;10;10;10;10;10;10;10;10;10;10;10;10;10;10;10;10;10;10;10;10;10;10;10;10;10;10;10;10;10;10;10;10;10;10;10;10;10;10;10;10;10;10;10;10;10;10;10;10;10;10;10;10;10;10;10;10;10;10;10;10;10;10;10;10;10;10;10;10;10;10;10;10;10;10;10;10;10;10;10;10;10;10;10;10;10;10;10;10;10;10;10;10;10;10;10;10;10;10;10;10;10;10;10;10;10;10;10;10;10;10;10;10;10;10;10;10;10;10;10;10;10;10;10;10;10;10;10;10;10;10;10;…	79996494;79997576;79997608;79997615;79997769;79997769;79997769;79998014;79998014;79998014;79998244;79998244;79998244;79998451;79998451;79998451;79998757;79998757;79998757;79999381;79999381;79999381;79999681;79999681;79999681;80000712;80000712;80000712;80000923;80000923;80000923;80001490;80001490;80001490;80002035;80002035;80002035;80002507;80002507;80002507;80002831;80002831;80002831;80003132;800…	79996588;79997680;79997680;79997680;79997862;79997862;79997862;79998155;79998155;79998155;79998356;79998356;79998356;79998524;79998524;79998524;79998837;79998837;79998837;79999591;79999591;79999591;79999820;79999820;79999820;80000828;80000828;80000828;80001090;80001090;80001090;80001719;80001719;80001719;80002211;80002211;80002211;80002729;80002729;80002729;80003052;80003052;80003052;80003333;800…	+;+;+;+;+;+;+;+;+;+;+;+;+;+;+;+;+;+;+;+;+;+;+;+;+;+;+;+;+;+;+;+;+;+;+;+;+;+;+;+;+;+;+;+;+;+;+;+;+;+;+;+;+;+;+;+;+;+;+;+;+;+;+;+;+;+;+;+;+;+;+;+;+;+;+;+;+;+;+;+;+;+;+;+;+;+;+;+;+;+;+;+;+;+;+;+;+;+;+;+;+;+;+;+;+;+;+;+;+;+;+;+;+;+;+;+;+;+;+;+;+;+;+;+;+;+;+;+;+;+;+;+;+;+;+;+;+;+;+	6752	1.67005	2.26348	2.03858	1.98058	4.25123	1.83414	1.49838	1.06358	2.38437	2.62627	1.91297	1.82143
Hmha1	10;10;10;10;10;10;10;10;10;10;10;10;10;10;10;10;10;10;10;10;10;10;10;10;10;10;10;10;10;10;10;10;10;10;10;10;10;10;10;10;10;10;10;10;10;10;10;10;10;10;10;10;10;10;10;10;10;10;10;10;10;10;10;10;10;10;10;10;10;10;10;10;10;10;10;10;10;10;10;10;10;10;10;10;10;10;10;10;10;10;10;10;10;10;10;10;10;10;10;10;10;10;10;10;10	80016653;80016739;80016916;80017780;80017780;80017780;80019653;80020690;80020690;80020690;80020690;80020951;80020951;80020951;80020951;80021122;80021122;80021122;80021122;80021389;80021389;80021389;80021389;80021546;80021546;80021546;80021546;80021743;80021795;80021795;80021795;80022077;80022077;80022077;80022077;80022077;80022275;80022275;80022275;80022275;80024663;80024663;80024663;80024663;800…	80016918;80016918;80017103;80018104;80018104;80018104;80019798;80020833;80020833;80020833;80020833;80021035;80021035;80021035;80021035;80021194;80021194;80021194;80021194;80021455;80021455;80021455;80021455;80021859;80021683;80021683;80021683;80021859;80021859;80021859;80021859;80022355;80022187;80022187;80022187;80022187;80022355;80022355;80022355;80022355;80024851;80024851;80024851;80024851;800…	+;+;+;+;+;+;+;+;+;+;+;+;+;+;+;+;+;+;+;+;+;+;+;+;+;+;+;+;+;+;+;+;+;+;+;+;+;+;+;+;+;+;+;+;+;+;+;+;+;+;+;+;+;+;+;+;+;+;+;+;+;+;+;+;+;+;+;+;+;+;+;+;+;+;+;+;+;+;+;+;+;+;+;+;+;+;+;+;+;+;+;+;+;+;+;+;+;+;+;+;+;+;+;+;+	4478	3.86368	3.6231	3.94393	4.06602	3.01386	3.38679	3.25982	2.96529	3.95116	3.53907	3.49284	4.69642
Polr2e	10;10;10;10;10;10;10;10;10;10;10;10;10;10;10;10;10;10;10;10;10;10;10;10;10;10	80035949;80035949;80035949;80035951;80036175;80036510;80036527;80036527;80036527;80036527;80036764;80036764;80036764;80036764;80036915;80036915;80037188;80037188;80037188;80038439;80038439;80038439;80039583;80039583;80039583;80039583	80036301;80036301;80036301;80036301;80036301;80036598;80036598;80036598;80036973;80036598;80036973;80038613;80036842;80036842;80037185;80036973;80037384;80037384;80037384;80038613;80038613;80038613;80039650;80039701;80039710;80039795	-;-;-;-;-;-;-;-;-;-;-;-;-;-;-;-;-;-;-;-;-;-;-;-;-;-	2670	23.9373	23.987	23.1272	22.9816	26.0091	25.2247	26.7046	26.1688	27.9595	25.3785	25.851	27.1572
Gpx4	10;10;10;10;10;10;10;10;10;10;10;10;10;10;10;10;10;10;10;10;10;10;10;10;10;10;10;10;10;10;10;10;10;10;10	80047166;80048746;80053488;80054035;80054037;80054465;80054514;80054514;80054514;80054514;80054700;80054700;80054700;80054700;80054968;80054968;80054968;80054968;80054968;80055894;80055923;80055923;80055923;80055923;80055998;80056040;80056040;80056040;80056040;80056040;80056186;80056186;80056186;80056186;80056186	80047375;80048828;80053715;80054170;80054300;80054608;80054608;80054608;80054608;80054608;80054844;80054844;80054844;80054844;80055107;80055119;80055119;80055119;80055119;80055947;80055947;80055947;80055947;80055947;80056099;80056365;80056099;80056099;80056099;80056099;80056363;80056439;80056394;80056439;80056439	+;+;+;+;+;+;+;+;+;+;+;+;+;+;+;+;+;+;+;+;+;+;+;+;+;+;+;+;+;+;+;+;+;+;+	1724	44.6115	51.2655	49.059	41.1413	71.3607	46.7179	43.873	44.8246	55.352	60.2733	62.4245	47.8137
Sbno2	10;10;10;10;10;10;10;10;10;10;10;10;10;10;10;10;10;10;10;10;10;10;10;10;10;10;10;10;10;10;10;10	80057416;80057956;80058253;80058416;80058637;80058805;80059936;80060165;80060394;80060590;80060789;80060984;80061316;80062162;80062568;80063649;80064145;80064320;80066550;80066831;80067277;80068328;80068685;80068859;80069282;80069611;80069968;80072357;80082615;80084241;80086257;80102617	80057864;80058146;80058329;80058547;80058732;80058899;80060079;80060239;80060502;80060661;80060901;80061119;80061447;80062331;80062759;80063728;80064242;80064496;80066703;80066936;80067394;80068471;80068775;80068992;80069436;80069707;80070051;80072518;80082726;80084314;80086432;80102698	-;-;-;-;-;-;-;-;-;-;-;-;-;-;-;-;-;-;-;-;-;-;-;-;-;-;-;-;-;-;-;-	4227	7.16803	8.18541	8.29613	8.0187	10.5673	8.18423	7.68179	7.57562	9.11318	8.17735	8.34347	7.52784
Stk11	10;10;10;10;10;10;10;10;10;10;10;10;10;10;10;10;10;10;10;10;10;10;10;10;10;10;10;10;10;10;10;10;10;10;10;10;10;10;10;10;10;10;10;10;10;10;10;10;10;10;10;10;10;10;10;10;10;10;10;10;10;10;10;10;10;10;10	80115803;80115803;80116347;80116354;80116618;80117665;80124802;80124802;80124802;80124802;80124819;80125375;80125375;80125479;80125479;80125479;80125479;80125479;80126033;80126033;80126033;80126033;80126033;80126033;80126033;80126233;80126233;80126233;80126233;80126233;80126386;80126654;80126654;80126654;80126654;80126654;80126654;80126682;80127045;80127045;80127045;80127045;80127045;80127045;801…	80116907;80116907;80116716;80116907;80116907;80117814;80124885;80124885;80124885;80124885;80124885;80125568;80125568;80125568;80125568;80125568;80125568;80125568;80126509;80126369;80126165;80126165;80126165;80126165;80126165;80126369;80126369;80126369;80126369;80126369;80126781;80126781;80126781;80126781;80126781;80126781;80126781;80126781;80127102;80127102;80127102;80127102;80127102;80127102;801…	+;+;+;+;+;+;+;+;+;+;+;+;+;+;+;+;+;+;+;+;+;+;+;+;+;+;+;+;+;+;+;+;+;+;+;+;+;+;+;+;+;+;+;+;+;+;+;+;+;+;+;+;+;+;+;+;+;+;+;+;+;+;+;+;+;+;+	4580	42.5313	44.3584	43.0459	41.3943	44.1131	41.3039	46.2305	46.3782	47.3324	43.0193	48.604	43.7222
Cbarp	10;10;10;10;10;10;10;10;10;10;10;10;10;10;10;10;10;10;10;10;10;10;10;10;10;10;10;10;10;10;10;10;10;10;10;10;10;10;10;10;10;10;10;10;10;10;10;10;10;10;10;10;10;10;10;10;10;10;10;10;10;10;10;10;10;10;10;10;10;10;10;10;10;10;10;10;10;10;10;10;10;10;10	80130451;80130451;80130551;80130551;80132536;80133005;80133005;80133005;80133005;80133074;80134561;80134561;80134561;80134561;80134561;80134561;80135118;80135118;80135118;80135118;80135118;80135118;80135158;80135375;80135375;80135375;80135375;80135375;80135375;80135516;80136350;80136350;80136350;80136350;80136350;80136350;80136350;80136645;80136663;80136663;80136690;80136690;80136705;80136708;801…	80132251;80132251;80132251;80132251;80133185;80133185;80133185;80133185;80133185;80133185;80134768;80134681;80134768;80134768;80134768;80134768;80135246;80135246;80135246;80135246;80135246;80135246;80135246;80135588;80135546;80135546;80135546;80135546;80135546;80135546;80136494;80136494;80136494;80136494;80136494;80136494;80136494;80136743;80136743;80136743;80136743;80136743;80136743;80136743;801…	-;-;-;-;-;-;-;-;-;-;-;-;-;-;-;-;-;-;-;-;-;-;-;-;-;-;-;-;-;-;-;-;-;-;-;-;-;-;-;-;-;-;-;-;-;-;-;-;-;-;-;-;-;-;-;-;-;-;-;-;-;-;-;-;-;-;-;-;-;-;-;-;-;-;-;-;-;-;-;-;-;-;-	4996	2.55855	3.04111	2.89074	2.13107	2.87273	2.61352	2.42039	2.30527	3.07355	2.64915	2.69644	2.03153
Atp5d	10;10;10;10;10;10;10;10;10;10;10;10;10;10;10;10	80138632;80139705;80140479;80141457;80142041;80142041;80142315;80142370;80143832;80143832;80143832;80145219;80145219;80145423;80145423;80145423	80138855;80139925;80140546;80141666;80142400;80142606;80142606;80142606;80143985;80143985;80143985;80145307;80145307;80145812;80145818;80145813	+;+;+;+;+;+;+;+;+;+;+;+;+;+;+;+	1928	15.3136	14.459	16.0139	16.7001	18.362	15.8721	15.7673	14.243	17.4722	16.3065	15.2568	15.0578
Midn	10;10;10;10;10;10;10;10;10;10;10;10;10;10;10;10;10;10;10;10;10;10;10;10;10;10;10;10;10;10;10;10;10;10;10	80148272;80148272;80149112;80149682;80149682;80149682;80149886;80150457;80151154;80151238;80151378;80151378;80151378;80151378;80151661;80151661;80151661;80151661;80151661;80151661;80153517;80153591;80153591;80153591;80153816;80153816;80153816;80153816;80154331;80154331;80154331;80155134;80155134;80156365;80156365	80148349;80148349;80149267;80150278;80150313;80150313;80150313;80150582;80151465;80151465;80151465;80151465;80151465;80151465;80151723;80151723;80151723;80151723;80151723;80151723;80153687;80153696;80153719;80153719;80154133;80153868;80154133;80154133;80154472;80154472;80154472;80155406;80155406;80158368;80158367	+;+;+;+;+;+;+;+;+;+;+;+;+;+;+;+;+;+;+;+;+;+;+;+;+;+;+;+;+;+;+;+;+;+;+	4307	12.411	15.4632	13.0784	13.6138	14.5101	10.8242	12.8858	11.7763	12.8916	14.2509	11.1054	13.2793
Cirbp	10;10;10;10;10;10;10;10;10;10;10;10;10;10;10;10;10;10;10;10;10;10;10;10;10;10;10;10;10;10;10	80165985;80167778;80167840;80167863;80167886;80169808;80169808;80169808;80169808;80169808;80170016;80170016;80170016;80170016;80170202;80170202;80170202;80170202;80170227;80170425;80170425;80170425;80170425;80170694;80170694;80170694;80170982;80171982;80172414;80172637;80172637	80166076;80167916;80167916;80167916;80167916;80169916;80170129;80169916;80169916;80169916;80170122;80170122;80170122;80170122;80170340;80170340;80170340;80170316;80170340;80171204;80170506;80170506;80170506;80171137;80170764;80170764;80171655;80172512;80172512;80172698;80172786	+;+;+;+;+;+;+;+;+;+;+;+;+;+;+;+;+;+;+;+;+;+;+;+;+;+;+;+;+;+;+	2604	10.7432	9.15643	8.27855	12.424	9.53407	10.4593	16.6878	18.0383	11.2836	10.0666	11.4511	10.8678
1600002K03Rik	10;10;10	80172944;80174209;80174817	80173174;80174325;80175146	+;+;+	678	10.6645	11.3037	11.6813	11.4551	10.0271	10.3902	10.019	10.4586	10.6579	10.9924	11.9067	8.96841
Efna2	10;10;10;10	80179482;80186752;80188442;80188669	80179890;80187065;80188507;80190010	+;+;+;+	2131	2.3024	2.35554	3.2594	2.65497	1.9614	2.65304	2.01206	2.35258	2.4684	2.21096	2.55707	2.08105
Mum1	10;10;10;10;10;10;10;10;10;10;10;10;10;10;10;10;10;10;10;10;10;10;10;10;10;10;10;10;10;10;10;10;10;10;10;10;10;10;10;10;10;10;10;10;10;10;10;10;10;10;10;10;10;10;10;10;10;10;10;10;10;10;10;10;10;10;10	80226434;80226655;80226672;80226680;80226751;80228321;80228322;80228322;80228322;80228322;80228995;80228995;80228995;80228995;80228995;80230057;80230057;80230057;80232238;80232238;80232238;80232238;80234194;80234195;80234223;80234223;80234223;80234260;80236111;80236111;80236111;80236111;80236111;80236111;80236111;80238315;80238315;80238315;80238315;80238860;80238860;80238860;80239920;80239920;802…	80226704;80226704;80226806;80226704;80226806;80228438;80228438;80228438;80228438;80228438;80229171;80229080;80230127;80229080;80229080;80230127;80230127;80230127;80233047;80233047;80232680;80233047;80234327;80234327;80234327;80234327;80234327;80234327;80236181;80237114;80238920;80243903;80236181;80236181;80236181;80238391;80238920;80238391;80238391;80238920;80238920;80238920;80240392;80239995;802…	+;+;+;+;+;+;+;+;+;+;+;+;+;+;+;+;+;+;+;+;+;+;+;+;+;+;+;+;+;+;+;+;+;+;+;+;+;+;+;+;+;+;+;+;+;+;+;+;+;+;+;+;+;+;+;+;+;+;+;+;+;+;+;+;+;+;+	10361	5.91933	5.47198	5.7023	5.4358	4.93815	5.45663	6.17957	6.52566	6.10252	5.16749	5.94587	6.11583
Ndufs7	10;10;10;10;10;10;10;10;10;10;10;10;10;10;10;10;10;10;10;10;10;10;10;10;10;10;10;10;10;10;10;10;10;10	80249121;80249312;80249449;80249452;80249460;80249485;80252397;80252397;80252397;80252397;80252397;80253074;80253074;80253074;80253074;80253079;80253315;80253660;80253660;80253660;80253660;80254840;80254840;80254840;80254840;80255090;80255090;80255090;80255924;80255924;80255924;80256636;80256636;80256636	80249204;80249491;80249491;80249491;80249491;80249491;80252433;80252433;80252433;80252433;80252433;80253157;80253413;80253157;80253157;80253157;80253783;80253783;80253941;80253783;80253783;80255019;80255140;80255019;80255019;80255136;80255136;80255136;80256012;80256012;80256012;80256794;80256792;80256793	+;+;+;+;+;+;+;+;+;+;+;+;+;+;+;+;+;+;+;+;+;+;+;+;+;+;+;+;+;+;+;+;+;+	1718	15.6573	14.8699	15.0625	14.55	14.6854	15.5661	14.7782	15.2741	18.2161	14.186	16.1819	16.6588
Gamt	10;10;10;10;10;10;10;10;10;10;10;10;10;10;10;10;10;10;10	80258151;80258164;80258577;80258793;80258940;80258940;80259177;80259177;80259177;80259177;80259601;80259601;80259601;80259768;80259768;80259768;80260721;80260721;80260721	80258457;80258457;80259050;80259050;80259050;80259098;80259289;80259244;80259244;80259244;80259664;80259664;80259664;80259913;80259913;80259913;80260918;80260968;80261012	-;-;-;-;-;-;-;-;-;-;-;-;-;-;-;-;-;-;-	1444	6.02066	10.3045	15.7208	8.44174	16.1468	17.5875	5.8052	5.2234	19.097	9.04698	12.7884	5.03412
Dazap1	10;10;10;10;10;10;10;10;10;10;10;10;10;10;10;10;10;10;10;10;10;10;10;10;10;10;10;10;10;10;10;10;10;10;10;10;10;10;10;10;10;10;10;10;10;10;10;10;10;10;10;10;10;10;10;10;10	80261486;80264984;80265016;80265074;80265124;80274007;80274007;80274007;80274007;80274007;80274448;80274448;80274448;80274448;80274448;80274804;80274804;80274804;80274804;80274804;80277572;80277575;80277575;80277575;80277575;80278233;80278233;80278233;80278233;80278233;80280423;80280929;80280929;80280929;80280929;80282867;80283024;80283024;80283024;80283024;80284230;80284230;80284230;80284230;802…	80261575;80265178;80265178;80265178;80265178;80274047;80274047;80274047;80274047;80274047;80274614;80274614;80274614;80274614;80274614;80274869;80274869;80274869;80274869;80274869;80277682;80277682;80277682;80277682;80277682;80278376;80278281;80278281;80278281;80278281;80281011;80281011;80281011;80281011;80281005;80283177;80283177;80283177;80283177;80283177;80284259;80284259;80284259;80284259;802…	+;+;+;+;+;+;+;+;+;+;+;+;+;+;+;+;+;+;+;+;+;+;+;+;+;+;+;+;+;+;+;+;+;+;+;+;+;+;+;+;+;+;+;+;+;+;+;+;+;+;+;+;+;+;+;+;+	2944	22.7181	24.7384	24.3123	23.3934	24.9569	24.6907	24.301	24.6077	24.0578	26.1882	23.3593	26.9902
Rps15	10;10;10;10;10;10;10	80292453;80292645;80292775;80293642;80293642;80293967;80293967	80292483;80292860;80292860;80293876;80293876;80294087;80294114	+;+;+;+;+;+;+	630	1085.81	1021.43	1032.25	1038.07	959.689	1013.85	1198.52	1192.22	1016.36	1026.14	1113.69	1193.48
Apc2	10;10;10;10;10;10;10;10;10;10;10;10;10;10;10;10;10;10;10;10;10;10;10;10;10;10;10;10;10;10;10;10;10;10;10;10;10;10;10;10;10;10;10	80295977;80299091;80300847;80301034;80301035;80301820;80301820;80301820;80301820;80301820;80302137;80302137;80302137;80302137;80302137;80302137;80302314;80302314;80302314;80302314;80302314;80304696;80304696;80304907;80304907;80305185;80305185;80305529;80305529;80306134;80306134;80307129;80307129;80307437;80307437;80307932;80307932;80308214;80308214;80308961;80308961;80311033;80311033	80296053;80299278;80301978;80301315;80301249;80301978;80301978;80301978;80301978;80301978;80303355;80302227;80302227;80302227;80302227;80302227;80302494;80302347;80302406;80302361;80302494;80304804;80304804;80305020;80305020;80305262;80305262;80305627;80305627;80306506;80306521;80307224;80307224;80307576;80307576;80308009;80308009;80308330;80308330;80309175;80309175;80318256;80318263	+;+;+;+;+;+;+;+;+;+;+;+;+;+;+;+;+;+;+;+;+;+;+;+;+;+;+;+;+;+;+;+;+;+;+;+;+;+;+;+;+;+;+	11281	0.144976	0.0913767	0.153927	0.150459	0.17856	0.107392	0.119576	0.12011	0.103619	0.13289	0.161011	0.121581
2310011J03Rik	10;10	80318254;80320183	80319547;80320537	-;-	1649	6.49888	6.22401	5.44494	5.95749	6.07722	5.90466	6.60272	4.65621	5.31652	5.63651	5.59928	5.12914
Pcsk4	10;10;10;10;10;10;10;10;10;10;10;10;10;10;10;10;10;10;10;10;10;10;10;10;10;10;10;10;10;10;10;10;10;10;10;10;10;10;10;10;10;10;10;10;10;10;10;10;10;10;10;10;10;10;10;10;10;10;10;10;10;10	80321283;80321283;80321283;80321287;80321287;80322081;80322081;80322081;80322081;80322081;80322122;80322724;80322724;80322724;80322724;80322724;80322724;80322990;80322990;80322990;80322990;80323483;80323483;80323483;80323483;80323673;80323673;80323673;80323673;80323854;80323854;80323854;80323854;80324932;80324932;80324932;80324932;80325233;80325233;80325233;80325233;80325583;80325583;80325773;803…	80321951;80321951;80321951;80321921;80321951;80322209;80322209;80322209;80322209;80322209;80322209;80323126;80323127;80322848;80322848;80322848;80322848;80323175;80323175;80323175;80323175;80323600;80323600;80323600;80323600;80323776;80323776;80323776;80323776;80323954;80323954;80323954;80323954;80325144;80325144;80325144;80325144;80325849;80325405;80325405;80325259;80325671;80325671;80325849;803…	-;-;-;-;-;-;-;-;-;-;-;-;-;-;-;-;-;-;-;-;-;-;-;-;-;-;-;-;-;-;-;-;-;-;-;-;-;-;-;-;-;-;-;-;-;-;-;-;-;-;-;-;-;-;-;-;-;-;-;-;-;-	2958	0.698397	0.787881	0.758849	1.00851	0.578833	0.697775	0.912063	0.855055	1.20349	0.506805	0.596996	0.695517
Reep6	10;10;10;10;10;10;10;10;10;10;10;10;10;10;10;10;10;10;10;10;10;10;10;10;10;10;10;10;10;10;10;10;10;10;10;10	80329953;80329953;80329953;80329953;80330145;80330198;80330202;80333503;80333503;80333503;80333503;80333503;80333503;80333503;80333689;80333689;80333689;80333689;80333689;80333689;80333689;80333966;80333966;80333966;80333966;80333966;80333966;80334713;80334713;80334713;80335110;80335110;80335110;80335110;80335110;80335110	80330345;80330345;80330345;80330345;80330345;80330345;80330345;80333596;80333596;80333596;80333596;80333596;80333596;80333596;80333827;80333827;80333827;80333827;80333827;80333827;80333827;80334432;80334134;80334134;80334134;80334134;80334134;80334793;80334793;80334793;80335582;80336440;80336441;80336441;80336441;80336441	+;+;+;+;+;+;+;+;+;+;+;+;+;+;+;+;+;+;+;+;+;+;+;+;+;+;+;+;+;+;+;+;+;+;+;+	2506	10.2702	7.27895	8.7882	9.19491	9.30406	9.09575	10.4196	7.42541	10.2407	9.24671	9.66411	11.8037
Adamtsl5	10;10;10;10;10;10;10;10;10;10;10;10;10;10;10;10;10;10;10;10;10;10;10;10;10;10;10;10;10;10;10;10;10;10;10;10;10;10;10;10;10;10;10;10;10;10;10;10;10;10;10;10;10;10;10;10;10;10;10;10;10	80339110;80339649;80339793;80339821;80340841;80340841;80341589;80341589;80341589;80341589;80341743;80341743;80341743;80341743;80342059;80342059;80342059;80342059;80342307;80342307;80342307;80342307;80342739;80342909;80342909;80343006;80343599;80343599;80343599;80343599;80343599;80343599;80344833;80344833;80344833;80344833;80344833;80344833;80345043;80345043;80345043;80345043;80345043;80345209;803…	80339143;80340085;80341456;80341456;80341456;80341456;80341660;80341660;80341660;80341660;80341941;80341941;80341941;80341941;80342222;80342222;80342222;80342222;80342393;80343020;80343020;80342393;80343020;80343020;80343020;80343020;80343726;80343726;80343726;80343726;80343726;80343726;80344941;80344941;80345416;80344941;80344941;80344941;80345103;80345416;80345103;80345103;80345103;80345238;803…	-;-;-;-;-;-;-;-;-;-;-;-;-;-;-;-;-;-;-;-;-;-;-;-;-;-;-;-;-;-;-;-;-;-;-;-;-;-;-;-;-;-;-;-;-;-;-;-;-;-;-;-;-;-;-;-;-;-;-;-;-	4722	0.154947	0.161353	0.224229	0.228741	0.213293	0.209051	0.183646	0.162602	0.337567	0.154203	0.192331	0.135549
Plk5	10;10;10;10;10;10;10;10;10;10;10;10;10;10;10;10;10;10;10;10;10;10;10;10;10;10;10;10;10;10;10;10;10;10;10;10;10;10;10;10	80356459;80356459;80357977;80357984;80357984;80358242;80358242;80358242;80358775;80358787;80359242;80359242;80359242;80359270;80359410;80359410;80359410;80359410;80360155;80360155;80360155;80360155;80360440;80360440;80360440;80360440;80360686;80360686;80361122;80361122;80361404;80361404;80363009;80363009;80364016;80364016;80364223;80364223;80365090;80365090	80356667;80356667;80358091;80358091;80358091;80358917;80358358;80358358;80358916;80358916;80359329;80359329;80359329;80359329;80359505;80359505;80359505;80359505;80360353;80360353;80360353;80360353;80360527;80360785;80360566;80360566;80360762;80360762;80361194;80361194;80361481;80361481;80363165;80363165;80364145;80364145;80364333;80364333;80365489;80365489	+;+;+;+;+;+;+;+;+;+;+;+;+;+;+;+;+;+;+;+;+;+;+;+;+;+;+;+;+;+;+;+;+;+;+;+;+;+;+;+	2678	0	0.0334715	0	0	0.0188045	0	0	0.0337306	0	0.0319883	0	0
Mex3d	10;10;10;10;10;10	80380355;80380357;80380454;80381239;80386661;80386661	80382621;80382621;80381062;80381987;80387659;80387651	-;-;-;-;-;-	3266	6.5362	6.6555	6.39306	8.94505	8.21833	6.73187	6.26913	6.07089	5.80786	7.68516	7.50796	6.81721
Mbd3	10;10;10;10;10;10;10;10;10;10;10;10;10;10;10;10;10;10;10;10;10;10;10;10;10;10;10;10;10;10;10;10;10;10	80392539;80392539;80392539;80392839;80392982;80393095;80393095;80393095;80393095;80393893;80393893;80393893;80393893;80393893;80393895;80394566;80394566;80394566;80394566;80394566;80394566;80395064;80395064;80395064;80395064;80395064;80395064;80395436;80395436;80395436;80395436;80399122;80399218;80399218	80393018;80393018;80393280;80393018;80393018;80393280;80393280;80393280;80393280;80394070;80394070;80394070;80394070;80394070;80394070;80394656;80394656;80394656;80394656;80394656;80394656;80395326;80395201;80395285;80395201;80395170;80395201;80395719;80395595;80395595;80395595;80399550;80399422;80399550	-;-;-;-;-;-;-;-;-;-;-;-;-;-;-;-;-;-;-;-;-;-;-;-;-;-;-;-;-;-;-;-;-;-	1987	147.917	154.507	136.99	146.77	159.895	147.233	143.996	139.496	139.103	161.068	144.178	158.83
Uqcr11	10;10;10;10;10;10;10;10;10	80402997;80402997;80402998;80404136;80404136;80404136;80406500;80406557;80406696	80403155;80403155;80403155;80404286;80404286;80404286;80406795;80406766;80406830	-;-;-;-;-;-;-;-;-	641	85.6075	84.8122	103.932	77.9936	100.088	95.06	78.5404	71.7993	111.82	77.7797	90.8342	88.6557
Tcf3	10;10;10;10;10;10;10;10;10;10;10;10;10;10;10;10;10;10;10;10;10;10;10;10;10;10;10;10;10;10;10;10;10;10;10;10;10;10;10;10;10;10;10;10;10;10;10;10;10;10;10;10;10;10;10;10;10;10;10;10;10;10;10;10;10;10;10;10;10;10;10;10;10;10;10;10;10;10;10;10;10;10;10;10;10;10;10;10;10;10;10;10;10;10;10;10;10;10;10;10;10;10;10;10;10;10;10;10;10;10;10;10;10;10;10;10;10;10;10;10;10;10;10;10;10;10;10;10;10;10;10;10;10;…	80409514;80409514;80409547;80409547;80409608;80409608;80409620;80409626;80409626;80410054;80410054;80410398;80410398;80410398;80410398;80410398;80410398;80410398;80412627;80412827;80412827;80412827;80412827;80413205;80413205;80413205;80413205;80413205;80413205;80413205;80413205;80413205;80413205;80413205;80413205;80415162;80415162;80415162;80415162;80415162;80415162;80415162;80415162;80415162;804…	80410274;80410274;80410274;80410274;80410274;80410274;80410274;80410274;80410274;80410274;80410274;80410624;80410624;80410621;80410624;80410624;80410624;80410624;80413062;80413062;80413062;80413062;80413062;80413337;80413337;80413337;80413337;80413337;80413337;80413337;80413337;80413337;80413337;80413337;80413337;80415288;80415288;80415288;80415288;80415288;80415288;80415288;80415288;80415288;804…	-;-;-;-;-;-;-;-;-;-;-;-;-;-;-;-;-;-;-;-;-;-;-;-;-;-;-;-;-;-;-;-;-;-;-;-;-;-;-;-;-;-;-;-;-;-;-;-;-;-;-;-;-;-;-;-;-;-;-;-;-;-;-;-;-;-;-;-;-;-;-;-;-;-;-;-;-;-;-;-;-;-;-;-;-;-;-;-;-;-;-;-;-;-;-;-;-;-;-;-;-;-;-;-;-;-;-;-;-;-;-;-;-;-;-;-;-;-;-;-;-;-;-;-;-;-;-;-;-;-;-;-;-;-;-;-;-;-;-;-;-;-;-;-;-;-;-;-;-;-;-;-;-;-;-;-;-;-;-;-;-;-;-;-;-;-;-;-;-;-;-;-;-;-;-;-;-;-;-;-;-;-;-;-;-;-;-;-;-;-;-;-;-;-;-;-;-;-;-;-…	4039	28.11	28.4178	26.8857	27.5826	25.4224	28.284	31.0839	31.1874	32.5586	28.8659	29.4434	27.9247
Onecut3	10;10	80494835;80513857	80496190;80517276	+;+	4776	0.00901146	0	0	0.0215385	0	0.0187898	0.0201744	0.0094567	0	0	0.0105642	0
Atp8b3	10;10;10;10;10;10;10;10;10;10;10;10;10;10;10;10;10;10;10;10;10;10;10;10;10;10;10;10	80519585;80521770;80522011;80523652;80524329;80525178;80525488;80525984;80526170;80526867;80527064;80528494;80528692;80529121;80529373;80529631;80529936;80530540;80530964;80532498;80533123;80533276;80534165;80534443;80535287;80536256;80536759;80539016	80520462;80521897;80522149;80523891;80524412;80525401;80525854;80526083;80526245;80526978;80527228;80528606;80528880;80529277;80529404;80529839;80530126;80530628;80531122;80532580;80533193;80533348;80534226;80534541;80535400;80536347;80536814;80539124	-;-;-;-;-;-;-;-;-;-;-;-;-;-;-;-;-;-;-;-;-;-;-;-;-;-;-;-	4411	0.0683	0.0914452	0.0480077	0.0466416	0.0342497	0.071206	0.0327657	0.0204784	0.120456	0.0388413	0.0915071	0.0310941
Rexo1	10;10;10;10;10;10;10;10;10;10;10;10;10;10;10;10;10;10;10;10;10;10;10;10;10;10;10;10;10;10;10;10;10;10;10;10;10;10;10;10;10;10;10;10;10;10;10;10;10;10;10;10;10;10;10;10;10;10;10;10;10;10;10;10;10;10;10;10;10;10;10	80540922;80540925;80541664;80542273;80542273;80542565;80542565;80542565;80542565;80542616;80542908;80542908;80542908;80542908;80542908;80542908;80543301;80543301;80543301;80543301;80543301;80543301;80543647;80543647;80543647;80543647;80543647;80543647;80544003;80544003;80544003;80544003;80544003;80544003;80544283;80544283;80544283;80544283;80544283;80544283;80544760;80544760;80544760;80544760;805…	80542824;80542481;80542481;80542481;80542481;80542824;80542824;80542824;80542824;80542824;80543023;80543023;80543023;80543023;80543023;80543023;80543411;80543411;80543411;80543497;80543411;80543411;80543720;80543720;80543720;80543720;80543720;80543720;80544116;80544116;80544116;80544116;80544116;80544116;80544420;80544420;80544420;80544313;80544444;80544420;80544894;80544873;80545836;80544873;805…	-;-;-;-;-;-;-;-;-;-;-;-;-;-;-;-;-;-;-;-;-;-;-;-;-;-;-;-;-;-;-;-;-;-;-;-;-;-;-;-;-;-;-;-;-;-;-;-;-;-;-;-;-;-;-;-;-;-;-;-;-;-;-;-;-;-;-;-;-;-;-	7155	10.8153	9.53994	11.9155	10.5312	11.5708	12.7555	10.4971	10.3902	11.592	9.57216	9.84413	10.4728
Klf16	10;10	80567124;80576747	80569222;80577321	-;-	2674	3.55705	3.36892	3.50033	3.15452	3.05089	3.38958	2.77456	3.04029	3.59651	3.34777	3.20767	2.76979
Abhd17a	10;10;10;10;10;10;10;10;10;10;10;10;10;10	80583654;80583655;80583656;80584143;80585608;80585608;80585608;80586515;80586515;80586515;80586679;80590175;80590175;80590175	80584063;80584322;80584063;80584322;80585802;80585802;80585802;80586624;80587030;80587030;80586929;80590315;80590341;80590324	-;-;-;-;-;-;-;-;-;-;-;-;-;-	1547	8.76355	8.48854	10.6223	8.14566	9.83081	10.0936	8.90657	7.59079	10.3381	9.21988	8.44717	7.41783
Adat3	10;10;10;10;10;10;10;10	80602880;80606021;80606314;80609330;80609641;80611028;80612342;80614604	80602949;80608850;80607654;80609458;80609797;80611129;80612459;80615783	+;+;+;+;+;+;+;+	4586	3.45361	3.55732	3.26924	3.56651	3.76645	2.94502	3.17254	2.93485	3.11661	3.22223	3.19055	3.44934
Scamp4	10;10;10;10;10;10;10;10;10;10;10;10;10;10	80602882;80603253;80608803;80608803;80609330;80609330;80609641;80609641;80611028;80611028;80612342;80612342;80614604;80614604	80602949;80603313;80608850;80608850;80609458;80609458;80609797;80609797;80611129;80611129;80612459;80612459;80614963;80615783	+;+;+;+;+;+;+;+;+;+;+;+;+;+	1863	7.87773	8.22752	7.50203	7.89594	8.56878	6.88825	7.08553	6.81236	7.01595	7.35713	7.1227	8.02469
Csnk1g2	10;10;10;10;10;10;10;10;10;10;10;10;10;10;10;10;10;10;10;10;10;10;10	80622780;80629656;80634214;80634214;80637888;80637888;80638010;80638010;80638161;80638394;80638394;80638706;80638706;80638880;80638880;80639085;80639085;80639580;80639580;80639768;80639768;80640022;80640022	80622950;80629730;80634641;80634641;80637928;80637928;80638079;80638309;80638309;80638628;80638628;80638791;80638791;80638964;80638964;80639233;80639233;80639663;80639663;80639874;80639874;80640771;80640771	+;+;+;+;+;+;+;+;+;+;+;+;+;+;+;+;+;+;+;+;+;+;+	2511	73.7881	75.3933	70.874	73.9864	78.4959	74.2115	73.2911	66.5877	79.0118	81.8436	74.1248	71.8098
Btbd2	10;10;10;10;10;10;10;10;10;10;10;10;10;10;10;10;10;10;10;10;10;10;10;10;10;10;10;10;10;10;10	80642617;80642617;80642623;80643826;80643826;80643826;80644131;80644262;80644262;80644603;80644603;80644603;80644638;80645340;80645340;80645340;80645340;80646381;80646381;80646381;80646381;80647705;80647705;80647705;80647705;80648560;80648560;80648560;80656130;80656130;80656130	80643691;80643691;80643691;80644632;80643972;80643972;80644349;80644349;80644349;80644795;80644795;80644795;80644813;80645537;80645537;80645537;80645537;80646486;80646486;80646486;80646486;80647710;80647861;80647861;80647861;80648679;80648679;80648679;80656138;80657071;80656494	-;-;-;-;-;-;-;-;-;-;-;-;-;-;-;-;-;-;-;-;-;-;-;-;-;-;-;-;-;-;-	3586	7.6452	8.91117	8.14923	7.53008	8.58032	9.34687	7.8055	7.44357	8.14923	9.42406	7.58368	8.17224
Mknk2	10;10;10;10;10;10;10;10;10;10;10;10;10;10;10;10;10;10;10;10;10;10;10;10;10;10;10;10;10;10;10;10;10;10;10;10;10	80665327;80665332;80667613;80667613;80667966;80667966;80668522;80668522;80668945;80668945;80669155;80669155;80669298;80669298;80669630;80669630;80669896;80669896;80669923;80671559;80671559;80671559;80671610;80671736;80671736;80671736;80671736;80671928;80671928;80671928;80671928;80671946;80672170;80675824;80675824;80676081;80677936	80667332;80667332;80667656;80667656;80668130;80668130;80668716;80668716;80669040;80669040;80669210;80669210;80669402;80669402;80669703;80669703;80669975;80669975;80669975;80671656;80671656;80671656;80671656;80671837;80671837;80671837;80671837;80672251;80671976;80672015;80672015;80672015;80672291;80675940;80675940;80676293;80678112	-;-;-;-;-;-;-;-;-;-;-;-;-;-;-;-;-;-;-;-;-;-;-;-;-;-;-;-;-;-;-;-;-;-;-;-;-	3892	4.56706	4.68681	4.47246	4.66501	4.30868	4.94584	3.89917	3.87595	4.62798	4.11595	4.22617	4.27585
Mob3a	10;10;10;10	80685256;80689852;80691069;80701797	80687173;80690054;80691567;80701820	-;-;-;-	2644	4.60664	4.00042	4.48512	4.6882	4.62826	4.34445	4.75569	3.50184	4.32057	4.39015	4.50352	4.14995
Izumo4	10;10;10;10;10;10;10;10;10;10	80702693;80703049;80703209;80703730;80703853;80704039;80704180;80704418;80704699;80705064	80702959;80703129;80703280;80703756;80703928;80704086;80704194;80704435;80704713;80705382	+;+;+;+;+;+;+;+;+;+	938	5.46014	4.15692	3.29608	4.7157	3.86547	3.63552	4.62247	6.16327	4.02179	3.88139	4.46454	3.94799
Ap3d1	10;10;10;10;10;10;10;10;10;10;10;10;10;10;10;10;10;10;10;10;10;10;10;10;10;10;10;10;10;10;10	80706978;80708458;80708747;80709201;80709400;80709767;80710420;80710689;80712112;80712596;80712765;80713557;80713973;80714247;80715108;80715871;80716474;80717699;80719009;80719667;80721120;80721591;80722913;80723533;80723691;80727054;80727882;80729978;80730874;80732851;80741896	80707983;80708537;80708868;80709286;80709488;80709956;80710467;80710832;80712207;80712667;80712930;80713630;80714160;80714322;80715179;80716012;80716619;80717930;80719388;80719812;80721168;80721640;80722962;80723606;80723830;80727183;80727989;80730058;80730954;80732946;80742211	-;-;-;-;-;-;-;-;-;-;-;-;-;-;-;-;-;-;-;-;-;-;-;-;-;-;-;-;-;-;-	4730	84.6034	79.1095	79.0816	81.3919	83.5333	83.4885	76.4916	71.51	81.3957	75.6402	83.885	79.5099
Dot1l	10;10;10;10;10;10;10;10;10;10;10;10;10;10;10;10;10;10;10;10;10;10;10;10;10;10;10;10;10;10;10;10;10;10;10;10;10;10;10;10;10;10;10;10;10;10;10;10;10;10;10;10;10;10;10;10;10;10;10;10;10;10;10;10;10;10;10;10;10;10;10;10;10;10;10;10;10;10;10;10;10;10;10;10;10;10;10;10	80755206;80755208;80755463;80764602;80764602;80764602;80766163;80766163;80768605;80771138;80771138;80773104;80773104;80773706;80773706;80777556;80777556;80777556;80778263;80778263;80778263;80780843;80780843;80780843;80781368;80781368;80781368;80782143;80782143;80783184;80783184;80783184;80783424;80783424;80783424;80783873;80783873;80783873;80784565;80784565;80784565;80784742;80784742;80784742;807…	80755524;80755524;80755524;80764645;80764645;80764645;80766587;80766237;80768668;80771366;80771366;80773198;80773198;80773768;80773768;80777611;80777611;80777611;80778342;80778342;80778342;80780911;80780911;80780911;80781474;80781474;80781474;80782184;80782184;80783291;80783291;80783291;80783655;80783655;80783655;80783986;80783986;80783986;80784656;80784656;80784656;80784843;80784843;80784843;807…	+;+;+;+;+;+;+;+;+;+;+;+;+;+;+;+;+;+;+;+;+;+;+;+;+;+;+;+;+;+;+;+;+;+;+;+;+;+;+;+;+;+;+;+;+;+;+;+;+;+;+;+;+;+;+;+;+;+;+;+;+;+;+;+;+;+;+;+;+;+;+;+;+;+;+;+;+;+;+;+;+;+;+;+;+;+;+;+	8705	11.1144	11.0128	10.4506	10.9722	11.7841	11.0513	10.0559	10.8594	9.9735	10.5346	9.87069	12.1479
Plekhj1	10;10;10;10;10;10	80796100;80796591;80796732;80797773;80797910;80798081	80796522;80796654;80796822;80797839;80797977;80798626	-;-;-;-;-;-	1259	28.0316	23.3169	21.6976	22.7143	24.1593	25.1614	28.1253	23.892	25.828	26.128	22.4421	26.7993
Sf3a2	10;10;10;10;10;10;10;10;10;10;10;10;10;10;10;10;10;10;10;10;10;10;10;10;10;10;10	80798198;80798732;80798969;80801196;80801196;80801196;80801456;80801456;80801456;80802398;80802398;80802398;80802500;80802792;80802792;80803460;80803460;80803460;80803583;80803583;80803583;80803801;80803801;80803820;80803972;80803972;80803972	80798805;80798805;80799102;80801358;80801358;80801358;80801527;80801527;80801527;80802401;80802444;80802444;80802901;80802901;80802901;80803509;80803509;80803509;80803723;80803723;80803723;80803888;80803888;80803888;80804017;80804007;80804924	+;+;+;+;+;+;+;+;+;+;+;+;+;+;+;+;+;+;+;+;+;+;+;+;+;+;+	2658	39.0717	32.0372	33.1585	32.4317	28.8548	32.6481	37.2108	38.5043	36.9412	31.391	31.8901	38.2365
Amh	10;10;10;10;10	80805248;80806024;80806344;80806540;80806799	80805650;80806166;80806452;80806699;80807648	+;+;+;+;+	1665	72.0156	45.5182	52.9595	44.7924	25.4968	49.7747	73.0315	71.8574	62.6108	40.7743	48.7577	64.6651
Jsrp1	10;10;10;10;10;10;10;10;10;10;10;10;10;10;10;10;10;10;10;10;10;10;10	80808496;80808498;80808501;80809146;80809146;80809146;80810176;80810176;80810176;80810183;80810464;80810464;80810464;80810464;80811850;80811850;80812067;80812067;80812295;80812295;80813463;80813463;80813463	80809039;80809039;80809039;80809228;80809228;80809228;80810364;80810364;80810364;80810364;80810566;80810566;80810566;80810566;80812104;80811885;80812104;80812104;80812417;80812417;80813495;80813498;80813492	-;-;-;-;-;-;-;-;-;-;-;-;-;-;-;-;-;-;-;-;-;-;-	1333	18.7588	8.64089	11.2474	10.2251	5.59119	10.6368	17.2756	19.1774	14.7082	9.35048	9.38692	11.4211
Oaz1	10;10;10;10;10;10;10;10;10;10;10;10;10;10;10;10;10;10;10;10;10;10;10;10;10;10;10;10;10;10;10;10;10;10	80826656;80826682;80826683;80826686;80826693;80827712;80828237;80828237;80828237;80828237;80828243;80828296;80828296;80828296;80828296;80828461;80828461;80828461;80828461;80828461;80828593;80828711;80828711;80828711;80828711;80828711;80828711;80828719;80828871;80828871;80828871;80828871;80828871;80828893	80826905;80828633;80826905;80826905;80826905;80827737;80828382;80828294;80828294;80828291;80828294;80828382;80828382;80828382;80828382;80828633;80828633;80828633;80828633;80828633;80828633;80828796;80829284;80828796;80828796;80828796;80828796;80828796;80828977;80829005;80829290;80828957;80829290;80829285	+;+;+;+;+;+;+;+;+;+;+;+;+;+;+;+;+;+;+;+;+;+;+;+;+;+;+;+;+;+;+;+;+;+	2558	41.0197	35.8476	39.4384	39.8322	43.0154	39.7655	40.3793	42.3755	40.2132	38.4955	43.2751	42.3765
Lingo3	10;10	80832807;80843942	80836141;80844039	-;-	3433	0.0501471	0.0391654	0.0123368	0.0149822	0.0586758	0.0130702	0.0280667	0.0263124	0.0309543	0.0623832	0.0293939	0.0133174
Lsm7	10;10;10;10	80852825;80853758;80854618;80855181	80853100;80853829;80854708;80855209	-;-;-;-	468	98.6764	85.4229	96.4693	94.0759	85.1144	84.6585	106.132	107.412	103.541	86.4883	102.742	97.6895
Sppl2b	10;10;10;10;10;10;10;10;10;10;10;10;10;10;10	80855275;80861346;80862180;80862699;80862955;80863180;80863455;80864038;80865121;80865310;80865455;80865608;80866052;80866500;80867400	80855388;80861465;80862362;80862788;80863094;80863319;80863551;80864154;80865202;80865384;80865517;80865707;80866129;80866660;80868705	+;+;+;+;+;+;+;+;+;+;+;+;+;+;+	2866	5.52626	5.25434	5.37902	5.22237	5.65786	5.46393	5.12694	4.93256	6.28475	5.15601	5.33419	6.1575
Tmprss9	10;10;10;10;10;10;10;10;10;10;10;10;10;10;10;10;10;10	80879720;80882635;80883719;80883943;80885148;80886066;80887384;80888286;80889330;80890178;80892157;80892986;80894291;80894802;80897198;80897844;80898185;80899179	80879963;80882762;80883786;80884118;80885189;80886179;80887555;80888560;80889466;80890496;80892328;80893257;80894427;80895207;80897369;80898106;80898321;80899441	+;+;+;+;+;+;+;+;+;+;+;+;+;+;+;+;+;+	3497	0.0246147	0.0897135	0.0847774	0.0588322	0.0720024	0.025662	0.0964356	0.0904079	0.106357	0.0244966	0.07214	0.0261474
Timm13	10;10;10	80899450;80900482;80900624	80900259;80900550;80900969	-;-;-	1225	16.1966	18.9517	19.3265	14.1496	18.7046	20.4387	15.0625	14.969	18.8676	14.7553	17.0516	18.4741
Lmnb2	10;10;10;10;10;10;10;10;10;10;10;10;10;10;10;10;10;10;10;10;10;10;10;10;10;10;10;10;10;10;10;10;10;10;10	80901203;80901364;80902798;80903212;80903212;80903212;80903450;80903450;80903450;80903931;80903931;80903931;80904115;80904115;80904115;80904553;80904553;80904553;80904886;80904886;80904886;80905081;80905081;80905081;80906004;80907151;80907151;80907385;80907385;80909909;80909909;80909923;80917506;80917964;80917964	80902900;80902900;80902900;80903322;80903322;80903322;80903569;80903569;80903569;80904038;80904038;80904038;80904388;80904388;80904388;80904773;80904773;80904773;80905011;80905011;80905011;80905251;80905251;80905251;80906412;80907276;80907276;80907541;80907541;80910045;80910045;80910045;80917851;80918245;80918245	-;-;-;-;-;-;-;-;-;-;-;-;-;-;-;-;-;-;-;-;-;-;-;-;-;-;-;-;-;-;-;-;-;-;-	4286	13.0241	13.8449	14.437	11.0404	13.3005	14.0912	12.342	12.0237	13.0911	13.7011	13.4554	17.1525
Gadd45b	10;10;10;10	80930091;80930448;80931029;80931533	80930359;80930549;80931251;80932204	+;+;+;+	1266	10.3007	8.31935	7.86162	9.83178	11.3366	8.96691	9.93211	12.0583	12.213	9.67617	11.7967	8.41426
Gng7	10;10;10;10;10;10;10;10;10;10;10;10;10;10;10;10;10;10;10;10;10;10;10;10	80948624;80948624;80948624;80948629;80951187;80951712;80952831;80952831;80952831;80952831;80952831;80952831;80968431;80997992;80997992;80997992;80997992;80997992;80997992;81001233;81001233;81014856;81014856;81014856	80951746;80951746;80951746;80951746;80951746;80951746;80952946;80952946;80952946;80952946;80952946;80952946;80968542;80998190;80998044;80998044;80998044;80998044;80998044;81001378;81001365;81014913;81014945;81014925	-;-;-;-;-;-;-;-;-;-;-;-;-;-;-;-;-;-;-;-;-;-;-;-	3786	0.875326	0.887843	0.995605	0.991729	0.784773	1.06664	1.41246	1.93258	1.10869	0.803247	0.959519	0.881527
Diras1	10;10;10;10	81019589;81022091;81025339;81025581	81022470;81022470;81025409;81025662	-;-;-;-	3035	0.0141808	0.162439	0.0976826	0.0847348	0.0663703	0.0443525	0.0793681	0.0297629	0.105041	0.0282256	0.0498729	0.0301276
Slc39a3	10;10;10;10;10;10;10;10;10;10;10;10;10;10;10;10;10	81028538;81028540;81028541;81033612;81033612;81033612;81033857;81033883;81034918;81034918;81034918;81034918;81036988;81036988;81037204;81037204;81037204	81031700;81031700;81031700;81033933;81033912;81033933;81033933;81033933;81035005;81035009;81035005;81035005;81037250;81037111;81037282;81037308;81037426	-;-;-;-;-;-;-;-;-;-;-;-;-;-;-;-;-	4016	2.14336	2.35475	2.5732	2.24127	2.67091	2.81555	2.02735	2.04683	2.38146	2.66635	2.83933	2.67527
Sgta	10;10;10;10;10;10;10;10;10;10;10;10	81044075;81046190;81046475;81047639;81048380;81048838;81049253;81049782;81050999;81051223;81052116;81060128	81045003;81046312;81046564;81047676;81048442;81048976;81049357;81049881;81051086;81051329;81052251;81060178	-;-;-;-;-;-;-;-;-;-;-;-	1969	31.3009	30.5693	30.9953	31.9993	32.609	30.9464	31.0982	30.3701	35.0262	30.3676	30.8776	32.0658
Thop1	10;10;10;10;10;10;10;10;10;10;10;10;10;10;10;10;10;10;10;10;10;10;10;10;10;10	81070035;81070127;81070159;81073153;81073153;81073279;81075511;81075511;81076943;81076943;81076943;81077913;81077913;81077913;81078470;81078470;81078470;81078868;81079458;81079871;81079871;81080413;81081027;81081307;81081600;81081864	81070278;81070278;81070278;81074877;81073365;81073365;81075659;81075659;81077050;81077050;81077050;81078015;81078015;81078015;81078755;81078604;81078630;81079593;81079593;81080079;81080237;81080614;81081213;81081435;81081736;81082559	+;+;+;+;+;+;+;+;+;+;+;+;+;+;+;+;+;+;+;+;+;+;+;+;+;+	5059	8.36274	8.85912	9.94557	8.41814	10.1732	9.85384	8.85632	8.88306	9.68346	9.36401	8.88617	11.6669
Creb3l3	10;10;10;10;10;10;10;10;10;10;10;10;10;10;10;10;10;10;10;10;10	81084324;81085650;81086030;81086517;81088510;81089307;81089943;81090077;81090623;81091138;81091138;81091798;81091798;81091798;81092503;81092503;81092631;81092807;81092807;81098656;81098656	81085134;81085746;81086114;81086585;81088616;81089444;81090183;81090183;81091435;81091435;81091435;81091929;81091906;81091929;81092575;81092657;81092657;81092955;81092882;81098754;81098874	-;-;-;-;-;-;-;-;-;-;-;-;-;-;-;-;-;-;-;-;-	3016	1.15588	1.2334	0.60383	0.937955	1.21889	0.743866	2.6037	2.33613	0.598979	1.39177	1.37178	2.56182
Map2k2	10;10;10;10;10;10;10;10;10;10;10;10;10;10;10;10;10;10;10;10;10;10;10;10;10;10;10;10;10;10;10;10;10;10;10;10;10;10;10;10;10;10;10;10	81105915;81105947;81105972;81106345;81108748;81108748;81108748;81108748;81115026;81115026;81115026;81115026;81118152;81118152;81118152;81118152;81118612;81118977;81119109;81119109;81119109;81119257;81119257;81119257;81119257;81119490;81119490;81119490;81120854;81121043;81121046;81121046;81121903;81121903;81121903;81121903;81122160;81122567;81122567;81122567;81123620;81123620;81123620;81123620	81106238;81106238;81106238;81106373;81108958;81108958;81108958;81108958;81115172;81115172;81115172;81115172;81118229;81118229;81118229;81118229;81119160;81119160;81119125;81119160;81119160;81119327;81119381;81119381;81119381;81119703;81119703;81119703;81121110;81121110;81121110;81121110;81122562;81121964;81121964;81121964;81122612;81122612;81122612;81122612;81123927;81123845;81123883;81124697	+;+;+;+;+;+;+;+;+;+;+;+;+;+;+;+;+;+;+;+;+;+;+;+;+;+;+;+;+;+;+;+;+;+;+;+;+;+;+;+;+;+;+;+	3722	16.6859	18.1706	16.8294	16.7485	19.7808	19.0113	16.2961	17.0977	20.3567	18.6427	17.975	17.7372
Zbtb7a	10;10;10;10;10;10;10;10;10;10;10;10;10;10;10;10;10	81135220;81136271;81136549;81136566;81136578;81137399;81137953;81143962;81143962;81143962;81143962;81143962;81143962;81147970;81147970;81147970;81152698	81135591;81136699;81136659;81136699;81136699;81137480;81138070;81145217;81145217;81144107;81145217;81144496;81145217;81148458;81152222;81148443;81152995	+;+;+;+;+;+;+;+;+;+;+;+;+;+;+;+;+	6808	9.96946	9.96694	10.7436	10.5618	9.35715	9.87298	9.41875	9.73228	10.5751	8.8458	10.0865	9.78439
Pias4	10;10;10;10;10;10;10;10;10;10;10;10;10;10;10;10;10;10;10;10;10;10;10;10;10;10;10;10;10;10;10;10;10;10;10	81153266;81154235;81154448;81155502;81155591;81155591;81155672;81155833;81155833;81155833;81155833;81155859;81156092;81157012;81157012;81157012;81157227;81157227;81157227;81157227;81157437;81157437;81157437;81157651;81157651;81157651;81157933;81157933;81157933;81163043;81163785;81163785;81167685;81167685;81167685	81154372;81154578;81154578;81155751;81155751;81155751;81155751;81156124;81155906;81155906;81155906;81155933;81157117;81157117;81157117;81157117;81157355;81157259;81157355;81157355;81157527;81157527;81157527;81157692;81157692;81157692;81158011;81158017;81158017;81164190;81164190;81164190;81167714;81167721;81167923	-;-;-;-;-;-;-;-;-;-;-;-;-;-;-;-;-;-;-;-;-;-;-;-;-;-;-;-;-;-;-;-;-;-;-	4582	6.55632	5.6732	6.82149	5.62384	6.24261	6.6786	6.06674	5.63826	6.16909	5.78638	6.21049	6.9047
Eef2	10;10;10;10;10;10;10;10;10;10;10;10;10;10	81176631;81177665;81178053;81178681;81179081;81179346;81179544;81179882;81180153;81180565;81180804;81181228;81181493;81181889	81176729;81177879;81178234;81178892;81179259;81179451;81179796;81180077;81180411;81180672;81181157;81181410;81181625;81182507	+;+;+;+;+;+;+;+;+;+;+;+;+;+	3098	441.126	452.957	444.591	479.11	507.714	534.211	471.765	419.447	425.716	505.512	471.372	511.229
4930442H23Rik	10	81182605	81183849	-	1245	1.76303	2.44791	2.78947	2.52006	2.95275	2.16241	2.39915	1.37854	2.00582	1.58256	1.49946	1.90953
Dapk3	10;10;10;10;10;10;10;10;10;10;10;10;10;10;10;10;10;10	81183007;81183263;81183976;81183976;81189939;81189939;81190382;81190382;81190598;81190598;81191042;81191042;81191759;81191759;81192297;81192297;81192426;81192426	81183096;81183300;81184075;81184075;81190299;81190299;81190511;81190511;81190646;81190646;81191068;81191068;81191911;81191911;81192342;81192342;81193197;81193197	+;+;+;+;+;+;+;+;+;+;+;+;+;+;+;+;+;+	1766	24.6388	26.1398	27.6513	27.9305	27.7171	25.8396	27.4164	23.9381	27.6195	26.9218	25.1702	26.5614
Nmrk2	10;10;10;10;10;10;10	81198170;81199604;81200025;81200292;81200532;81200891;81201951	81199446;81199710;81200096;81200448;81200580;81200981;81202037	-;-;-;-;-;-;-	1840	0	0	0	0.0559066	0.0273687	0	0	0	0	0.0232784	0.027421	0
Atcay	10;10;10;10;10;10;10;10;10;10;10;10;10;10;10;10;10;10;10;10;10;10;10;10;10;10;10;10;10;10;10;10	81204508;81204508;81207514;81207514;81207834;81207834;81209812;81210053;81210053;81210524;81210524;81210524;81211846;81211846;81211846;81212472;81212472;81212472;81212849;81212849;81212849;81213223;81213223;81213223;81214722;81214722;81219155;81219155;81224424;81224424;81230492;81230492	81206741;81206741;81207546;81207546;81207908;81207908;81210088;81210088;81210088;81210622;81210622;81210622;81211932;81211932;81211932;81212603;81212603;81212603;81212951;81212951;81212951;81213276;81213408;81213408;81214943;81214943;81219213;81219232;81224551;81224551;81230833;81230785	-;-;-;-;-;-;-;-;-;-;-;-;-;-;-;-;-;-;-;-;-;-;-;-;-;-;-;-;-;-;-;-	3996	0.0107705	0	0.0317961	0.0257428	0.0126022	0.0673723	0.0241123	0.056513	0.0132965	0.0214376	0.113637	0.0114411
Zfr2	10;10;10;10;10;10;10;10;10;10;10;10;10;10;10;10;10;10;10;10;10;10;10;10;10;10;10;10;10;10;10;10;10;10;10;10;10;10;10;10;10;10;10;10;10;10;10;10;10;10;10;10	81233155;81233155;81233176;81233176;81233187;81233611;81233615;81237357;81237357;81237357;81237357;81237357;81239430;81239430;81239430;81239934;81239934;81239934;81241995;81241995;81242770;81242770;81243650;81244661;81244661;81245405;81245405;81246029;81246029;81246590;81246590;81247219;81247219;81248390;81248390;81248416;81248984;81248984;81248984;81249051;81249165;81249165;81249165;81249165;812…	81233242;81233242;81233242;81233242;81233242;81233761;81233761;81237591;81237591;81237577;81237553;81237591;81239514;81239514;81239514;81242417;81240214;81240214;81242174;81242174;81243795;81242956;81243795;81244780;81244780;81245544;81245544;81246161;81246161;81246756;81246756;81247393;81247393;81248528;81248528;81248528;81249078;81249078;81249078;81249078;81249260;81249260;81249260;81249260;812…	+;+;+;+;+;+;+;+;+;+;+;+;+;+;+;+;+;+;+;+;+;+;+;+;+;+;+;+;+;+;+;+;+;+;+;+;+;+;+;+;+;+;+;+;+;+;+;+;+;+;+;+	7483	2.95629	2.52751	2.48466	2.98308	2.50346	2.83623	3.17399	3.17478	3.20232	2.47274	3.0409	2.57828
Matk	10;10;10;10;10;10;10;10;10;10;10;10;10;10;10;10;10;10;10;10;10;10;10;10;10;10;10;10;10;10;10;10;10;10;10;10;10;10;10;10;10;10;10;10;10;10;10;10;10;10;10;10;10;10;10;10;10;10;10;10;10;10;10;10;10;10;10;10;10;10;10;10;10;10;10;10;10;10;10;10;10;10;10;10;10;10;10;10;10;10;10;10;10;10;10;10;10;10;10;10;10;10;10;10;10;10;10;10;10;10;10;10	81252935;81257299;81257299;81257299;81257305;81257342;81257448;81257830;81257918;81258169;81258215;81258480;81258480;81258480;81258480;81258480;81258480;81258480;81258480;81258480;81258480;81259174;81259174;81259174;81259174;81259177;81259177;81259177;81259177;81259177;81259177;81259383;81259383;81259383;81259383;81259383;81259383;81259383;81259383;81259383;81259383;81259587;81259587;81259587;812…	81253278;81257574;81257574;81257574;81257574;81257574;81257574;81257970;81257970;81258304;81258304;81258539;81258539;81258539;81258539;81258539;81258539;81258539;81258539;81258539;81258539;81259287;81259287;81259287;81259287;81259287;81259287;81259287;81259287;81259287;81259287;81259498;81259498;81259498;81259498;81259498;81259498;81259498;81259498;81259498;81259498;81259806;81259806;81260973;812…	+;+;+;+;+;+;+;+;+;+;+;+;+;+;+;+;+;+;+;+;+;+;+;+;+;+;+;+;+;+;+;+;+;+;+;+;+;+;+;+;+;+;+;+;+;+;+;+;+;+;+;+;+;+;+;+;+;+;+;+;+;+;+;+;+;+;+;+;+;+;+;+;+;+;+;+;+;+;+;+;+;+;+;+;+;+;+;+;+;+;+;+;+;+;+;+;+;+;+;+;+;+;+;+;+;+;+;+;+;+;+;+	4594	0.646424	0.712176	0.525487	0.705343	0.61386	0.439519	0.702617	0.599712	0.693944	0.438206	0.80174	0.676724
Mrpl54	10;10;10;10;10	81264713;81265430;81265651;81266773;81266773	81264997;81265807;81265807;81266934;81266924	-;-;-;-;-	825	45.8558	50.5768	47.7427	44.0151	47.3675	44.4349	43.6216	37.665	55.8379	47.9202	44.5836	41.6178
Apba3	10;10;10;10;10;10;10;10;10;10;10	81268172;81268779;81269545;81270968;81271196;81271365;81271662;81272185;81272584;81272822;81273049	81268319;81269461;81269584;81271113;81271282;81271526;81271832;81272397;81272703;81272959;81273246	+;+;+;+;+;+;+;+;+;+;+	2106	8.86933	8.19328	8.00391	8.27927	8.34526	8.05359	8.25817	7.31308	8.35091	8.74543	8.24141	9.11768
Tjp3	10;10;10;10;10;10;10;10;10;10;10;10;10;10;10;10;10;10;10;10;10	81273207;81273649;81273803;81274383;81274580;81275174;81276268;81277196;81277819;81278624;81279195;81279505;81279894;81280083;81280406;81280766;81281105;81282938;81283496;81283683;81291048	81273389;81273695;81274069;81274483;81274790;81275244;81276363;81277410;81278065;81278732;81279351;81279571;81279955;81280191;81280565;81280869;81281432;81283040;81283605;81283739;81291267	-;-;-;-;-;-;-;-;-;-;-;-;-;-;-;-;-;-;-;-;-	3024	0.29888	0.148209	0.210081	0.221112	0.199835	0.163218	0.254902	0.194163	0.316268	0.283282	0.150163	0.317491
Pip5k1c	10;10;10;10;10;10;10;10;10;10;10;10;10;10;10;10;10;10;10;10;10;10;10;10;10;10;10;10;10;10;10;10;10;10;10;10;10;10;10;10;10;10;10;10;10;10;10;10;10;10;10;10;10;10;10;10;10;10;10;10;10;10;10;10;10;10;10;10;10;10;10;10;10;10;10;10;10;10;10;10;10;10;10;10;10;10;10;10;10;10;10;10;10;10;10;10;10;10;10;10	81292963;81292980;81292988;81293004;81293005;81304684;81304684;81304684;81304684;81304684;81305139;81305186;81305186;81305186;81305186;81305699;81305699;81305699;81305699;81305699;81306308;81306308;81306308;81306308;81306308;81307484;81307484;81307484;81307484;81307484;81308948;81308948;81308948;81308948;81308948;81310679;81310679;81310679;81310679;81310688;81311643;81311643;81311643;81311643;813…	81293152;81293152;81293152;81293152;81293152;81304715;81304715;81304715;81304715;81304715;81305278;81305278;81305291;81305278;81305278;81305829;81305829;81305829;81305829;81305829;81306425;81306425;81306425;81306425;81306425;81307636;81307636;81307636;81307636;81307636;81309247;81309247;81309130;81309247;81309247;81310884;81310884;81310884;81310884;81310884;81311726;81311726;81311726;81311726;813…	+;+;+;+;+;+;+;+;+;+;+;+;+;+;+;+;+;+;+;+;+;+;+;+;+;+;+;+;+;+;+;+;+;+;+;+;+;+;+;+;+;+;+;+;+;+;+;+;+;+;+;+;+;+;+;+;+;+;+;+;+;+;+;+;+;+;+;+;+;+;+;+;+;+;+;+;+;+;+;+;+;+;+;+;+;+;+;+;+;+;+;+;+;+;+;+;+;+;+;+	5730	12.2807	14.126	12.5727	14.5775	13.2444	13.5706	13.1581	12.3357	13.0282	13.2758	12.5212	13.5879
Cactin	10;10;10;10;10;10;10;10;10	81321103;81322438;81323121;81323619;81323910;81324303;81324869;81325090;81325464	81321446;81323005;81323266;81323781;81324024;81324495;81324988;81325376;81326251	+;+;+;+;+;+;+;+;+	2724	35.202	36.3285	38.3566	36.6307	38.8596	37.1446	37.0874	33.7413	35.2269	39.8447	35.3776	42.513
Tbxa2r	10;10;10	81328732;81332392;81334459	81328917;81333255;81335171	+;+;+	1763	0.317359	0.381324	0.192183	0.175045	0.685538	0.305411	0.30059	0.281802	0.180827	0.826034	0.372043	0.285255
Gipc3	10;10;10;10;10;10	81337762;81338197;81340264;81341188;81341491;81343078	81338034;81338278;81340376;81341368;81341676;81343266	-;-;-;-;-;-	1024	0.58842	0.700286	0.289518	0.753428	0.295069	0.701093	0.611615	0.617493	0.518877	0.79474	0.44345	0.62506
Hmg20b	10;10;10;10;10;10;10;10;10;10;10;10;10;10;10;10;10;10;10;10;10;10;10;10;10;10;10;10;10;10;10;10;10;10;10;10;10;10;10;10;10;10;10;10;10;10;10;10;10;10;10;10;10;10;10;10;10;10;10;10;10;10;10;10;10;10;10;10;10;10;10;10;10;10;10;10;10;10;10;10;10;10;10	81346048;81346051;81346051;81346051;81346051;81346052;81346052;81346232;81346560;81346560;81346560;81346560;81346560;81346560;81346560;81346759;81346841;81346841;81346841;81346841;81346841;81346841;81346997;81346998;81347436;81347436;81347436;81347436;81347436;81347436;81347436;81347436;81347436;81347986;81347986;81347986;81347986;81347986;81347986;81347986;81347986;81348496;81348496;81348496;813…	81346477;81346477;81346477;81346477;81346477;81346477;81346112;81346477;81346730;81346692;81346692;81346692;81346692;81346692;81346692;81347056;81347056;81347056;81347056;81347056;81347056;81347056;81347056;81347056;81347922;81347508;81347562;81347508;81347508;81347508;81347508;81347508;81347508;81348032;81348032;81348032;81348032;81348032;81348032;81348032;81348032;81348616;81348616;81348616;813…	-;-;-;-;-;-;-;-;-;-;-;-;-;-;-;-;-;-;-;-;-;-;-;-;-;-;-;-;-;-;-;-;-;-;-;-;-;-;-;-;-;-;-;-;-;-;-;-;-;-;-;-;-;-;-;-;-;-;-;-;-;-;-;-;-;-;-;-;-;-;-;-;-;-;-;-;-;-;-;-;-;-;-	3149	32.1458	30.6142	29.9251	33.7449	31.9038	29.2246	32.648	31.554	36.5975	34.7528	33.8554	30.3291
Mfsd12	10;10;10;10;10;10;10;10;10;10;10;10;10	81357491;81357552;81360082;81360122;81361099;81361099;81361314;81362025;81362205;81362688;81362933;81363553;81363770	81357886;81357886;81360292;81360292;81361232;81361237;81361499;81362117;81362297;81362858;81363027;81363683;81366225	+;+;+;+;+;+;+;+;+;+;+;+;+	3971	2.91549	2.96832	2.78367	2.9402	2.7519	2.96045	2.59626	2.52498	3.85351	2.42691	3.21457	4.00657
4930404N11Rik	10;10;10;10;10;10;10;10;10;10;10;10	81363067;81363923;81364024;81364047;81364542;81364542;81364542;81364542;81364742;81364742;81365704;81365704	81364162;81364236;81364236;81364265;81364876;81364980;81364667;81364667;81364980;81364854;81365790;81365816	-;-;-;-;-;-;-;-;-;-;-;-	1751	1.9172	2.30363	2.39457	1.96806	1.95567	2.43441	2.0085	1.72819	2.9434	1.73677	2.07467	2.84599
Fzr1	10;10;10;10;10;10;10;10;10;10;10;10;10;10;10;10;10;10;10;10;10;10;10;10;10;10;10;10;10;10;10;10;10;10;10;10;10;10;10;10;10;10;10;10;10;10;10;10;10;10;10;10;10;10;10	81366222;81367098;81367372;81367509;81367641;81367641;81367641;81367641;81368131;81368131;81368131;81368131;81368276;81368523;81368523;81368523;81368523;81369074;81369074;81369074;81369074;81369338;81369338;81369338;81369338;81369971;81369971;81369971;81370198;81370198;81370198;81370465;81370465;81370465;81370697;81370697;81370697;81370697;81370955;81370955;81370955;81370955;81371095;81371095;813…	81367550;81367550;81367550;81367550;81367733;81367733;81367733;81367733;81368235;81368235;81368235;81368235;81368756;81370036;81368756;81368596;81368756;81369258;81369258;81369258;81369258;81369541;81369440;81369440;81369440;81370036;81370036;81370036;81370381;81370381;81370381;81370547;81370547;81370547;81370824;81370824;81370824;81370824;81371018;81371018;81371018;81371018;81371220;81371220;813…	-;-;-;-;-;-;-;-;-;-;-;-;-;-;-;-;-;-;-;-;-;-;-;-;-;-;-;-;-;-;-;-;-;-;-;-;-;-;-;-;-;-;-;-;-;-;-;-;-;-;-;-;-;-;-	4488	8.49651	9.03756	9.89921	8.95053	9.09998	10.9376	9.55371	7.96027	8.07413	9.27651	7.94819	10.2684
Dohh	10;10;10;10;10;10;10;10;10;10;10;10;10;10;10;10;10;10;10;10;10;10;10;10;10;10;10;10;10;10;10	81384428;81384459;81384466;81384467;81384895;81385621;81385719;81385719;81385719;81385719;81385719;81386413;81386413;81386413;81386413;81387240;81387240;81387240;81387240;81387317;81387707;81387707;81389005;81390329;81390359;81390359;81390359;81390789;81390789;81390789;81390789	81384578;81384626;81384578;81384578;81385097;81386047;81386101;81385994;81386047;81386047;81386047;81386489;81386489;81386489;81386489;81387681;81387451;81387480;81387480;81387480;81387918;81388352;81389130;81390584;81390584;81390584;81390584;81391135;81391267;81390858;81391560	+;+;+;+;+;+;+;+;+;+;+;+;+;+;+;+;+;+;+;+;+;+;+;+;+;+;+;+;+;+;+	3202	14.6106	13.871	12.9623	11.8385	13.9815	13.9991	13.3456	11.3266	14.5361	13.6041	13.63	14.0783
Smim24	10;10;10;10;10;10;10;10;10;10	81393051;81393627;81393654;81393784;81394088;81394088;81394093;81394776;81394776;81394776	81393159;81393895;81393895;81393895;81394150;81394150;81394150;81395392;81395141;81395392	+;+;+;+;+;+;+;+;+;+	1058	2.19668	1.99098	1.76135	1.40982	1.76112	1.99328	1.91249	1.62219	1.95859	2.14566	2.19368	1.68528
Nfic	10;10;10;10;10;10;10;10;10;10;10;10;10;10;10;10;10;10;10;10;10;10;10;10;10;10;10;10;10;10;10;10;10;10;10;10;10;10;10;10;10;10;10	81396186;81399138;81399138;81399196;81400509;81400769;81400953;81403352;81403352;81403352;81404824;81404824;81404824;81404824;81404824;81406089;81406089;81406089;81407555;81407555;81407555;81407555;81407555;81408106;81408106;81408106;81408106;81408335;81408335;81408335;81408335;81409611;81409611;81409611;81409611;81420267;81420267;81420267;81420267;81427076;81427076;81427076;81430786	81401071;81401071;81401071;81399625;81400554;81401071;81401071;81403428;81403428;81403428;81405008;81405008;81405008;81405008;81405008;81406214;81406214;81406214;81407679;81407641;81407679;81407679;81407679;81408229;81408229;81408229;81408229;81408409;81408409;81408409;81408409;81409682;81409682;81409682;81409682;81420798;81420798;81420798;81420798;81427173;81427114;81427187;81431005	-;-;-;-;-;-;-;-;-;-;-;-;-;-;-;-;-;-;-;-;-;-;-;-;-;-;-;-;-;-;-;-;-;-;-;-;-;-;-;-;-;-;-	6534	13.0882	12.9914	16.1398	14.1455	15.7919	20.0178	13.4929	12.1381	16.9385	13.1303	12.7256	12.7906
Celf5	10;10;10;10;10;10;10;10;10;10;10;10;10;10;10;10;10;10;10;10;10;10;10;10;10;10;10;10;10;10;10;10;10;10;10;10;10;10;10;10;10;10;10;10;10;10;10;10;10;10;10;10;10;10;10;10;10;10;10;10;10;10;10;10;10	81459227;81459228;81460930;81461548;81462669;81462669;81462669;81462669;81464340;81464340;81464340;81464340;81465967;81465967;81465967;81465967;81466925;81466925;81466925;81466925;81467015;81467156;81467156;81467156;81467156;81467156;81467507;81467759;81467985;81467985;81467985;81467985;81467985;81469444;81469444;81469444;81469444;81469444;81469444;81469444;81469445;81470629;81470629;81470629;814…	81462341;81462341;81462341;81462341;81462771;81462771;81462771;81462771;81464420;81464420;81464420;81464420;81466029;81466029;81466029;81466029;81467071;81467071;81467071;81467071;81467071;81467297;81467297;81467297;81467297;81467297;81468131;81468131;81468131;81468131;81468131;81468131;81468131;81469523;81469523;81469523;81469523;81469523;81469523;81469523;81469523;81470757;81470807;81470757;814…	-;-;-;-;-;-;-;-;-;-;-;-;-;-;-;-;-;-;-;-;-;-;-;-;-;-;-;-;-;-;-;-;-;-;-;-;-;-;-;-;-;-;-;-;-;-;-;-;-;-;-;-;-;-;-;-;-;-;-;-;-;-;-;-;-	6668	0.0709997	0.0739354	0.127032	0.0771356	0.0377613	0.127854	0.137275	0.0541874	0.0956203	0.0963534	0.158901	0.0617079
Ncln	10;10;10;10;10;10;10;10;10;10;10;10;10;10;10;10;10;10;10;10;10;10;10;10;10;10;10;10;10;10;10;10;10;10;10;10;10;10;10;10;10;10;10;10;10;10;10;10;10;10;10;10;10;10;10;10	81486249;81486457;81487098;81487290;81487340;81487380;81487680;81487680;81487680;81487680;81487680;81487680;81487847;81487847;81487847;81487847;81487847;81487847;81488195;81488195;81488195;81488195;81488195;81488195;81488226;81488428;81488428;81488428;81488428;81488549;81488549;81488549;81488549;81488549;81489802;81489802;81489802;81490227;81490227;81490227;81490925;81491170;81491170;81491977;814…	81487605;81487605;81487605;81487584;81487605;81487605;81487758;81487758;81487758;81487758;81487758;81487758;81487900;81487900;81487900;81487900;81487900;81487900;81488358;81488355;81488217;81488397;81488355;81488358;81488466;81488466;81488466;81488466;81488466;81488641;81488636;81488643;81488636;81488636;81490120;81490120;81490120;81490268;81490315;81490315;81491273;81491273;81491273;81492055;814…	-;-;-;-;-;-;-;-;-;-;-;-;-;-;-;-;-;-;-;-;-;-;-;-;-;-;-;-;-;-;-;-;-;-;-;-;-;-;-;-;-;-;-;-;-;-;-;-;-;-;-;-;-;-;-;-	3465	14.7686	15.0688	15.8776	16.64	15.6961	17.0027	15.6	14.2469	16.7909	16.0946	15.464	16.493
S1pr4	10	81497745	81500132	-	2388	0.0180229	0.0187681	0.070942	0.0215385	0.0421763	0.0563693	0	0	0.06675	0.0179365	0.0422569	0.0382903
Gna15	10;10;10;10;10;10;10;10;10;10;10;10;10;10	81502306;81502313;81503087;81507928;81507928;81507928;81509286;81509286;81511997;81511997;81512411;81512411;81514237;81523810	81503105;81503105;81503105;81508173;81508081;81508081;81509415;81509415;81512125;81512125;81512639;81512565;81514421;81524225	-;-;-;-;-;-;-;-;-;-;-;-;-;-	2135	0.282221	0.293891	0.456255	0.289091	0.212284	0.294229	0.112825	0.232701	0.273753	0.381177	0.283586	0.578175
Gna11	10;10;10;10;10;10;10;10;10;10;10;10	81528724;81530287;81531092;81531092;81531322;81531322;81532396;81533133;81533252;81535080;81535080;81544792	81530985;81530985;81531245;81531245;81532015;81531451;81532524;81533406;81533406;81535133;81535264;81545190	-;-;-;-;-;-;-;-;-;-;-;-	4097	11.3453	16.1355	12.9631	11.0476	21.9527	14.3361	10.0422	9.66802	11.8923	17.0932	13.5096	11.3934
Aes	10;10;10;10;10;10;10	81559494;81561219;81564095;81564673;81564848;81565292;81565472	81559668;81561316;81564158;81564717;81564910;81565366;81566362	+;+;+;+;+;+;+	1411	141.714	217.008	205.158	178.433	311.644	199.768	122.37	113.057	252.184	229.127	224.954	113.341
Tle2	10;10;10;10;10;10;10;10;10;10;10;10;10;10;10;10;10;10;10;10;10;10;10;10;10;10;10;10;10;10;10;10;10;10;10;10;10;10;10;10;10;10;10;10;10;10;10;10;10;10;10;10;10;10;10;10;10;10;10;10;10;10;10;10;10;10;10;10;10;10;10;10;10;10;10;10;10;10;10;10;10;10;10;10;10;10;10;10;10;10;10;10;10;10;10;10;10;10;10;10;10;10;10;10;10;10;10;10;10;10;10;10;10;10;10;10;10;10;10;10;10;10;10;10;10;10;10;10;10;10;10;10;10;…	81574561;81574734;81574739;81575260;81575262;81575331;81575417;81575499;81575532;81575578;81575578;81575805;81575805;81575805;81575805;81575805;81575805;81575805;81575805;81575805;81576236;81576236;81576236;81576236;81576236;81576236;81576236;81576236;81576529;81576598;81576598;81576598;81576598;81576598;81576598;81576598;81577629;81577629;81577629;81577629;81577629;81577629;81577689;81580257;815…	81575691;81574948;81574948;81575691;81575691;81575691;81575691;81575691;81575691;81575691;81575691;81575902;81575902;81575902;81575902;81575902;81575902;81575902;81575902;81575832;81576299;81576299;81576299;81576299;81576299;81576299;81576299;81576299;81576642;81576642;81576718;81576642;81576642;81576642;81576642;81576642;81577691;81577691;81577691;81577691;81577691;81577691;81577691;81580667;815…	+;+;+;+;+;+;+;+;+;+;+;+;+;+;+;+;+;+;+;+;+;+;+;+;+;+;+;+;+;+;+;+;+;+;+;+;+;+;+;+;+;+;+;+;+;+;+;+;+;+;+;+;+;+;+;+;+;+;+;+;+;+;+;+;+;+;+;+;+;+;+;+;+;+;+;+;+;+;+;+;+;+;+;+;+;+;+;+;+;+;+;+;+;+;+;+;+;+;+;+;+;+;+;+;+;+;+;+;+;+;+;+;+;+;+;+;+;+;+;+;+;+;+;+;+;+;+;+;+;+;+;+;+;+;+;+;+;+;+;+;+;+;+;+;+;+;+;+;+;+;+;+;+;+;+;+;+;+;+	6221	8.50259	12.5428	9.55158	11.0623	18.3997	11.1724	8.02296	8.6831	12.0683	13.1919	12.9117	6.19528
Tle6	10;10;10;10;10;10;10;10;10;10;10;10;10;10;10;10;10;10;10;10;10;10;10;10;10;10;10;10;10;10;10;10;10;10;10;10;10;10;10;10;10;10;10;10;10;10;10;10;10;10;10;10;10;10;10;10;10;10;10;10;10;10;10;10;10;10;10;10;10;10;10;10;10;10;10;10;10;10;10;10;10;10;10;10;10;10;10;10;10;10;10;10;10;10;10	81590904;81590904;81590905;81590905;81590905;81590907;81591133;81591260;81591260;81591260;81591260;81591260;81591260;81591886;81591886;81591886;81591886;81591886;81591886;81591886;81592713;81592713;81592713;81592713;81592713;81592713;81592713;81593919;81593995;81593995;81593995;81593995;81593995;81594239;81594327;81594327;81594327;81594327;81594327;81594327;81595208;81595208;81595208;81595208;815…	81591139;81591139;81591139;81591139;81591139;81591139;81591336;81591336;81591336;81591336;81591336;81591336;81591336;81592039;81592039;81592039;81592039;81592039;81592039;81592039;81592818;81592854;81592854;81592715;81592854;81592854;81592854;81594242;81594242;81594242;81594242;81594242;81594242;81594585;81594585;81594585;81594585;81594585;81594585;81594585;81595244;81595245;81595245;81595245;815…	-;-;-;-;-;-;-;-;-;-;-;-;-;-;-;-;-;-;-;-;-;-;-;-;-;-;-;-;-;-;-;-;-;-;-;-;-;-;-;-;-;-;-;-;-;-;-;-;-;-;-;-;-;-;-;-;-;-;-;-;-;-;-;-;-;-;-;-;-;-;-;-;-;-;-;-;-;-;-;-;-;-;-;-;-;-;-;-;-;-;-;-;-;-;-	3088	21.1152	21.8286	21.135	21.02	17.1232	21.5632	24.9775	25.8296	17.9634	17.7543	21.0609	21.7045
BC025920	10;10;10;10;10;10;10;10;10;10;10	81606270;81606303;81606876;81606883;81606883;81607025;81608110;81608139;81608139;81614232;81620542	81606390;81606390;81606984;81607057;81607057;81609809;81609545;81609545;81609836;81614293;81620703	+;+;+;+;+;+;+;+;+;+;+	3306	0.48168	0.596493	0.602106	0.606754	0.578833	0.583608	0.830629	1.09293	0.675011	0.712576	0.595201	0.622305
Sirt6	10;10;10;10;10;10;10;10;10;10;10;10;10;10;10;10;10;10;10;10;10;10	81621785;81621787;81622408;81622749;81622749;81623992;81623992;81624147;81624147;81625057;81625057;81625527;81625716;81625716;81625779;81626490;81626490;81626490;81626490;81626892;81627472;81627472	81622078;81622679;81622679;81622872;81622872;81624072;81624072;81624242;81624242;81625116;81625116;81625898;81625898;81625898;81625898;81627257;81626617;81626617;81626617;81627320;81627797;81627566	-;-;-;-;-;-;-;-;-;-;-;-;-;-;-;-;-;-;-;-;-;-	2785	2.8744	3.1059	3.10229	3.47203	3.48983	3.06115	3.20023	3.8435	3.54856	2.12239	3.2791	2.64298
Ankrd24	10;10;10;10;10;10;10;10;10;10;10;10;10;10;10;10;10;10;10;10;10;10;10;10;10;10;10;10;10;10;10;10;10;10;10;10;10;10;10;10;10;10;10;10;10;10;10;10;10;10;10;10;10;10;10;10;10;10;10;10;10;10;10;10;10;10;10;10;10;10;10;10;10;10;10;10;10;10;10;10;10;10;10;10;10;10;10;10;10;10;10;10;10;10;10;10;10;10;10;10;10	81628540;81628579;81628635;81628706;81628740;81629549;81629549;81629549;81629549;81633699;81633703;81633703;81633709;81633709;81634539;81634667;81634667;81634667;81634667;81634865;81634865;81634865;81634865;81634865;81634865;81635070;81635070;81635070;81635070;81635070;81635084;81635688;81635688;81635688;81635688;81635688;81635688;81636369;81636369;81636369;81636369;81636369;81636369;81638069;816…	81628640;81628640;81628640;81628925;81628925;81629742;81629748;81629748;81629747;81633755;81633755;81633755;81633755;81633755;81634753;81634753;81634753;81634753;81634753;81634995;81634995;81634995;81634995;81634985;81634995;81635158;81635158;81635158;81635158;81635158;81635158;81635898;81635752;81635752;81635752;81636426;81635752;81636426;81636426;81636421;81636426;81636426;81636426;81638139;816…	+;+;+;+;+;+;+;+;+;+;+;+;+;+;+;+;+;+;+;+;+;+;+;+;+;+;+;+;+;+;+;+;+;+;+;+;+;+;+;+;+;+;+;+;+;+;+;+;+;+;+;+;+;+;+;+;+;+;+;+;+;+;+;+;+;+;+;+;+;+;+;+;+;+;+;+;+;+;+;+;+;+;+;+;+;+;+;+;+;+;+;+;+;+;+;+;+;+;+;+;+	8142	14.9859	12.7596	12.8066	15.199	13.1617	13.9096	15.1003	15.6431	16.8104	11.2789	17.3326	12.6454
Gm10778	10;10;10;10;10;10;10	81649059;81661998;81661998;81662325;81662325;81662923;81662923	81649166;81662124;81662124;81662385;81662385;81667361;81664231	+;+;+;+;+;+;+	4735	0.690801	0.624711	0.47406	0.467088	0.489227	0.644384	0.803789	0.686778	0.650837	0.669396	0.564752	0.666228
Zfp433	10;10;10;10;10;10;10;10;10;10;10;10;10;10	81704825;81704878;81718469;81718919;81718919;81718919;81719245;81719245;81719245;81719857;81719857;81719857;81721483;81726618	81704900;81704900;81718616;81719045;81719045;81719045;81719305;81719305;81719305;81721468;81720268;81721976;81722146;81726686	+;+;+;+;+;+;+;+;+;+;+;+;+;+	2771	1.87935	1.77915	2.01751	2.07889	1.92638	2.23459	2.39926	2.67308	2.18591	2.41134	2.16677	2.29336
Gm3055	10;10	81745983;81747377	81746575;81747503	-;-	720	2.21171	2.48991	4.05877	2.78601	3.56706	3.36525	3.14485	3.07374	1.7711	3.03395	2.38258	4.38137
Gm4767	10;10;10;10;10;10;10	81812186;81821127;81821127;81821454;81821454;81822052;81822052	81812283;81821253;81821253;81821514;81821514;81826490;81823360	+;+;+;+;+;+;+	4725	0.528306	0.550151	0.573662	0.478962	0.490262	0.465318	0.632157	0.630879	0.438558	0.462317	0.459165	0.648286
Zfp781	10;10;10	81905073;81906467;81910888	81905665;81906593;81910899	-;-;-	732	1.64629	0.979635	1.33074	1.54583	1.51351	1.47115	2.30352	1.85103	1.08879	1.17028	1.44747	1.37406
Zfp873	10;10;10;10;10;10;10;10;10;10;10;10	82048123;82048143;82058370;82058370;82058417;82058683;82059260;82059517;82059517;82059517;82060259;82064189	82048229;82048229;82058496;82058496;82058496;82058743;82061584;82061329;82061586;82061581;82061348;82064745	+;+;+;+;+;+;+;+;+;+;+;+	3179	2.17969	1.52261	1.93177	1.47232	1.67914	1.79254	1.62154	1.91799	1.37053	1.53598	1.82519	1.51005
AU041133	10;10;10;10;10;10;10	82128013;82138253;82138253;82150217;82150217;82150706;82150706	82128098;82138379;82138379;82150277;82150277;82153065;82152011	+;+;+;+;+;+;+	2634	1.24182	1.17406	0.980826	1.21067	1.07064	1.19244	1.17057	1.37176	0.988427	1.26838	1.39833	1.24971
Zfp938	10;10;10;10;10;10;10;10	82224850;82224854;82227445;82227531;82227799;82227799;82241171;82241171	82226593;82226593;82227591;82227591;82227925;82227925;82241273;82241280	-;-;-;-;-;-;-;-	2128	2.73037	2.23249	2.12956	2.03029	2.4138	2.23506	2.6488	3.84159	3.27087	2.85817	2.65551	2.36328
4932415D10Rik	10	82282116	82285278	-	3163	0	0	0	0	0	0	0.0152313	0	0	0	0	0
Gm4924	10;10;10;10;10;10;10;10;10;10;10;10;10;10;10;10;10;10;10;10;10;10;10;10;10	82354255;82354259;82354296;82354316;82368571;82368571;82368571;82368571;82368898;82368898;82368898;82368898;82376561;82378593;82383763;82383763;82383763;82400754;82400754;82400754;82403971;82403971;82409434;82422000;82422000	82354381;82354381;82354381;82354381;82368697;82368697;82368697;82368697;82368958;82368958;82368958;82368958;82379636;82381237;82383844;82383844;82383844;82400986;82400986;82400846;82404029;82404029;82409486;82422882;82422208	+;+;+;+;+;+;+;+;+;+;+;+;+;+;+;+;+;+;+;+;+;+;+;+;+	6302	0.901478	1.29434	0.907263	1.06916	0.863014	0.911355	1.13905	1.4692	0.800957	1.04668	1.0408	1.03016
1190007I07Rik	10;10;10;10;10;10;10;10;10;10;10;10;10	82619851;82619851;82619942;82620026;82622361;82622708;82622708;82622708;82622708;82622965;82622965;82623094;82623153	82620217;82620217;82620217;82620217;82622824;82622824;82622824;82622824;82622926;82623137;82623196;82623190;82623228	-;-;-;-;-;-;-;-;-;-;-;-;-	1197	1.72586	1.53513	1.45067	1.58986	2.01939	1.38696	1.93189	2.37712	2.13065	1.82493	1.81249	1.83333
Tdg	10;10;10;10;10;10;10;10;10;10;10;10;10;10;10;10;10;10;10;10;10;10;10;10;10;10;10;10;10;10;10;10;10;10;10;10;10;10;10;10;10;10;10;10;10;10;10;10;10;10;10;10;10;10;10;10;10;10	82629828;82629859;82629876;82630667;82638701;82638701;82638701;82638701;82640418;82641162;82641316;82641316;82641316;82641440;82641441;82642021;82642021;82642021;82642021;82642021;82642021;82644024;82644170;82644170;82644170;82644170;82644170;82644170;82644438;82644451;82644451;82644451;82644451;82644478;82644615;82644615;82644615;82644615;82644615;82644615;82644615;82646905;82647222;82647222;826…	82629939;82630038;82630038;82630767;82638876;82638876;82638876;82638876;82641322;82641557;82641557;82641557;82641557;82641557;82641557;82642090;82642090;82642090;82642090;82642090;82642090;82644305;82644305;82644305;82644305;82644289;82644305;82644305;82644533;82644533;82644533;82644533;82644533;82644533;82644661;82644709;82644709;82644709;82644709;82644709;82644709;82647393;82647601;82647393;826…	+;+;+;+;+;+;+;+;+;+;+;+;+;+;+;+;+;+;+;+;+;+;+;+;+;+;+;+;+;+;+;+;+;+;+;+;+;+;+;+;+;+;+;+;+;+;+;+;+;+;+;+;+;+;+;+;+;+	5374	7.84852	9.09043	7.14016	7.34088	9.73622	7.39762	7.49451	7.02607	7.178	9.40493	8.29958	7.4865
Glt8d2	10;10;10;10;10;10;10;10;10;10;10;10;10;10;10;10;10;10;10;10;10;10;10;10;10;10;10;10;10;10;10;10;10;10;10	82650433;82651308;82651561;82652543;82652868;82652868;82652868;82652868;82654682;82654682;82654772;82659513;82659513;82659513;82660730;82660730;82660730;82662166;82662166;82662166;82664625;82664625;82664637;82669279;82670278;82670278;82670278;82670278;82672057;82672057;82672057;82690489;82690489;82690489;82690489	82651518;82651518;82652070;82652748;82653199;82652980;82652980;82652980;82654848;82654848;82654848;82659625;82659625;82659625;82660814;82660814;82660814;82662283;82662283;82662283;82664796;82664796;82664796;82672100;82670468;82670370;82670370;82670370;82672100;82672100;82672100;82690617;82690629;82690617;82690650	-;-;-;-;-;-;-;-;-;-;-;-;-;-;-;-;-;-;-;-;-;-;-;-;-;-;-;-;-;-;-;-;-;-;-	5773	0.0969173	0.0931612	0.139389	0.142551	0.1134	0.124358	0.0834513	0.0704117	0.0828333	0.170647	0.0873977	0.0712746
Hcfc2	10;10;10;10;10;10;10;10;10;10;10;10;10;10;10;10;10;10;10;10;10;10;10;10;10;10;10;10;10;10	82696160;82699007;82699211;82700919;82700919;82700919;82702443;82702443;82702443;82709009;82709009;82709964;82709964;82711835;82711835;82712050;82712050;82723619;82724344;82728253;82728349;82732603;82732603;82734350;82734350;82738279;82738279;82738980;82738980;82741281	82696207;82699306;82699306;82701067;82701067;82701067;82702603;82702603;82702603;82709057;82709217;82710048;82710048;82711941;82711941;82712230;82712238;82723786;82724396;82728427;82728427;82732676;82732676;82734481;82734481;82738464;82738464;82741395;82739265;82742428	+;+;+;+;+;+;+;+;+;+;+;+;+;+;+;+;+;+;+;+;+;+;+;+;+;+;+;+;+;+	5485	2.9111	2.85987	2.81062	2.7569	2.50645	2.77319	2.81066	2.36325	2.62517	2.88152	2.82399	3.02568
Nfyb	10;10;10;10;10;10;10;10;10;10;10;10;10;10;10;10;10;10;10;10;10;10;10;10;10;10;10;10	82748701;82749287;82750474;82750738;82751166;82751384;82751384;82752407;82752407;82752416;82752518;82754965;82754965;82754965;82755068;82756702;82756702;82756702;82756702;82756702;82761833;82761833;82761833;82761833;82763459;82763459;82764004;82764004	82750447;82752604;82750817;82750817;82751465;82751659;82751465;82752550;82752604;82752604;82752604;82755095;82755095;82755095;82755095;82756795;82757307;82756795;82756795;82756795;82761913;82761913;82761913;82761913;82763663;82763646;82764101;82764144	-;-;-;-;-;-;-;-;-;-;-;-;-;-;-;-;-;-;-;-;-;-;-;-;-;-;-;-	5068	10.1058	10.842	11.0394	9.6109	11.2184	11.1821	9.67712	9.29505	8.96383	10.0489	9.65688	10.6719
Txnrd1	10;10;10;10;10;10;10;10;10;10;10;10;10;10;10	82859206;82860524;82874613;82875624;82877266;82879206;82879750;82881723;82883914;82884485;82884942;82885186;82887173;82890384;82895977	82859300;82860630;82874735;82875696;82877385;82879348;82879865;82881948;82884006;82884561;82885098;82885293;82887268;82890518;82897724	+;+;+;+;+;+;+;+;+;+;+;+;+;+;+	3417	28.7555	35.5976	30.342	27.7115	41.0443	33.1305	30.1015	26.9247	25.2681	35.399	31.1115	32.4593
Eid3	10	82866626	82867930	+	1305	0.0659598	0.103031	0.0973618	0.118239	0.270122	0.206299	0.184584	0.449922	0.122145	0.229752	0.15465	0.140134
Gm4799	10	82954344	82955000	+	657	0.065508	0.136433	0.322316	0.0782862	0	0.204886	0.293312	0.0687446	0.242616	0.0651937	0.0767956	0.139174
Chst11	10;10;10	82985498;83092069;83190945	82985982;83092154;83195900	+;+;+	5527	22.9171	30.0194	27.7164	20.5569	26.5414	23.0966	21.0418	19.6285	29.7725	20.1413	20.8592	20.688
Slc41a2	10;10;10;10;10;10;10;10;10;10;10;10;10;10;10;10;10;10;10	83230848;83254783;83256011;83281370;83283722;83297154;83301016;83301162;83304304;83304304;83313415;83316055;83316215;83316342;83316572;83322839;83335202;83337226;83337760	83233750;83254931;83256142;83281449;83283869;83297300;83301306;83301306;83304375;83304375;83313522;83316789;83316789;83316789;83316789;83322883;83335402;83337440;83337882	-;-;-;-;-;-;-;-;-;-;-;-;-;-;-;-;-;-;-	5349	0.482768	0.611654	0.411726	0.509629	0.263608	0.436201	0.513378	0.66705	0.36753	0.448422	0.415032	0.384621
D10Wsu102e	10;10;10;10	83360221;83362047;83364379;83365704	83360373;83362133;83364515;83488505	+;+;+;+	123179	0.464702	0.449351	0.474139	0.447619	0.336462	0.473182	0.542469	0.547795	0.3839	0.405446	0.448927	0.512938
Aldh1l2	10;10;10;10;10;10;10;10;10;10;10;10;10;10;10;10;10;10;10;10;10;10;10;10;10;10;10;10;10;10;10;10;10;10;10;10;10;10;10;10;10;10;10;10;10;10;10;10;10;10;10;10;10;10;10;10;10;10;10;10;10;10;10;10;10;10;10;10;10;10;10;10;10;10;10;10;10;10;10;10;10	83487450;83489429;83492475;83492475;83493337;83493429;83493429;83494740;83494742;83495869;83495869;83495869;83497472;83497472;83497472;83499829;83499839;83499839;83499839;83501894;83501894;83501894;83501894;83502442;83502442;83502442;83502442;83503942;83503942;83503942;83503942;83503992;83504126;83504126;83504126;83504126;83506598;83506598;83506598;83506598;83506598;83508015;83508015;83508015;835…	83490634;83490634;83492674;83492674;83493534;83493534;83493534;83496091;83496034;83496017;83496034;83496034;83497502;83497570;83497570;83499938;83499938;83499938;83499938;83501987;83501987;83501987;83501987;83502529;83502529;83502529;83502529;83504196;83504047;83504047;83504047;83504047;83504196;83504196;83504196;83504196;83506748;83506748;83506748;83506748;83506748;83508142;83508120;83508142;835…	-;-;-;-;-;-;-;-;-;-;-;-;-;-;-;-;-;-;-;-;-;-;-;-;-;-;-;-;-;-;-;-;-;-;-;-;-;-;-;-;-;-;-;-;-;-;-;-;-;-;-;-;-;-;-;-;-;-;-;-;-;-;-;-;-;-;-;-;-;-;-;-;-;-;-;-;-;-;-;-;-	7503	0.298283	0.436057	0.462867	0.356467	0.617484	0.281073	0.365995	0.433413	0.346997	0.239765	0.309332	0.316856
A230046K03Rik	10;10;10;10;10;10;10;10;10;10;10;10;10;10;10;10;10;10;10;10;10;10;10;10;10;10;10;10;10;10;10;10;10	83543941;83546785;83549462;83549599;83550264;83550881;83554734;83555573;83556013;83556803;83558598;83558818;83560366;83564411;83569968;83571353;83572093;83572358;83573776;83574443;83576017;83576675;83579482;83580257;83581257;83583255;83585818;83586634;83588157;83590291;83590987;83591689;83594171	83544102;83546924;83549515;83549664;83550309;83550948;83554816;83555615;83556116;83556923;83558721;83558945;83560526;83564537;83570093;83571460;83572239;83572437;83573881;83574559;83576185;83576829;83579556;83580361;83581391;83583363;83585884;83586720;83588304;83590387;83591183;83591788;83596469	+;+;+;+;+;+;+;+;+;+;+;+;+;+;+;+;+;+;+;+;+;+;+;+;+;+;+;+;+;+;+;+;+	5854	9.10181	8.66661	8.06677	9.16394	7.68195	7.81814	9.30775	8.84942	7.68767	8.37768	9.00669	7.80982
Appl2	10;10;10;10;10;10;10;10;10;10;10;10;10;10;10;10;10;10;10;10;10;10;10;10;10;10;10;10;10;10;10;10;10;10;10;10;10;10;10;10;10;10;10;10;10;10;10;10;10;10;10;10;10;10;10;10;10;10;10;10;10;10;10;10;10;10;10;10;10;10;10;10;10;10;10;10;10;10;10;10;10;10;10;10;10;10;10;10;10;10;10;10;10;10;10;10;10;10;10;10;10;10;10;10;10;10	83600033;83600397;83600742;83601883;83601883;83601883;83601904;83602758;83602758;83602758;83602758;83602767;83602871;83603126;83603126;83603126;83603126;83603126;83603126;83605645;83605760;83605760;83605760;83605760;83605765;83608607;83608700;83608700;83608700;83608700;83608700;83608937;83608937;83608937;83608937;83608937;83608937;83610978;83610978;83610978;83610978;83610978;83610978;83611143;836…	83601041;83600827;83601041;83601930;83601930;83601930;83601930;83602898;83602898;83602898;83602898;83602898;83602898;83603162;83603384;83603162;83603130;83603162;83603162;83605934;83605934;83605934;83605934;83605934;83605934;83609095;83608752;83608752;83608752;83608752;83608752;83609095;83609095;83609095;83609095;83609008;83609095;83611102;83611066;83611268;83612900;83611199;83611066;83611199;836…	-;-;-;-;-;-;-;-;-;-;-;-;-;-;-;-;-;-;-;-;-;-;-;-;-;-;-;-;-;-;-;-;-;-;-;-;-;-;-;-;-;-;-;-;-;-;-;-;-;-;-;-;-;-;-;-;-;-;-;-;-;-;-;-;-;-;-;-;-;-;-;-;-;-;-;-;-;-;-;-;-;-;-;-;-;-;-;-;-;-;-;-;-;-;-;-;-;-;-;-;-;-;-;-;-;-	5949	40.4343	50.8378	43.8616	54.7367	52.4832	48.3093	40.799	44.0264	45.2555	40.4275	68.155	34.5061
1500009L16Rik	10;10;10;10;10;10	83722865;83737909;83757445;83758134;83759593;83761918	83723034;83737933;83757480;83758213;83759630;83762761	+;+;+;+;+;+	1193	6.27724	8.82842	8.41367	8.57953	8.27348	9.5156	5.8151	3.97514	7.30412	6.92928	10.0656	5.32682
Nuak1	10;10;10;10;10;10;10;10;10;10;10	84370905;84375296;84378092;84378092;84380747;84380747;84392256;84392256;84393992;84409616;84440115	84375387;84375387;84378224;84378224;84380866;84380866;84392388;84392321;84394143;84409736;84440597	-;-;-;-;-;-;-;-;-;-;-	5625	1.69094	5.76065	2.16091	1.94764	2.06805	2.12185	1.94419	1.44529	1.71915	6.49528	2.1617	1.85313
Ckap4	10;10;10;10;10	84526305;84526636;84533447;84533447;84533998	84528777;84528777;84533871;84534062;84534036	-;-;-;-;-	3089	24.3408	30.0191	28.3263	22.928	26.3123	23.3574	22.8171	19.9288	20.8301	28.6057	22.2955	27.8101
Tcp11l2	10;10;10;10;10;10;10;10;10;10;10;10;10;10;10;10;10;10	84576626;84576897;84584748;84584748;84587104;84587104;84589884;84589884;84591088;84591088;84594648;84594648;84594653;84604507;84604507;84604886;84608465;84613482	84577012;84577012;84585055;84585055;84587239;84587239;84590004;84590004;84591308;84591308;84595300;84594784;84594784;84604990;84604688;84605067;84608637;84614359	+;+;+;+;+;+;+;+;+;+;+;+;+;+;+;+;+;+	3438	5.08253	5.30572	6.07322	6.53772	5.77116	6.59085	7.73514	7.80341	7.04731	5.85549	7.44053	6.0905
Polr3b	10;10;10;10;10;10;10;10;10;10;10;10;10;10;10;10;10;10;10;10;10;10;10;10;10;10;10;10;10;10;10;10;10;10;10;10;10;10;10;10;10;10;10;10;10;10;10;10;10;10;10	84622292;84622293;84628250;84628250;84628483;84628483;84628627;84628627;84631785;84631785;84632455;84632455;84634901;84634901;84638055;84638055;84638134;84639096;84639742;84639742;84639742;84639742;84646796;84646796;84646796;84646796;84652674;84652674;84652674;84652674;84655945;84655945;84655945;84658125;84667322;84667322;84673328;84674557;84676883;84679746;84680366;84684177;84692797;84695555;846…	84622538;84622538;84628282;84628282;84628539;84628539;84628691;84628691;84631860;84631860;84632555;84632555;84634992;84634992;84638172;84638172;84638172;84639168;84639850;84639850;84639850;84639850;84646918;84646918;84646918;84646918;84652796;84652793;84652793;84652793;84656191;84656079;84656079;84658222;84667484;84667483;84673528;84674719;84677036;84679820;84680464;84684304;84693006;84695713;846…	+;+;+;+;+;+;+;+;+;+;+;+;+;+;+;+;+;+;+;+;+;+;+;+;+;+;+;+;+;+;+;+;+;+;+;+;+;+;+;+;+;+;+;+;+;+;+;+;+;+;+	5262	6.3961	6.85647	7.14726	7.36029	7.76145	7.87058	7.48923	7.11554	5.54352	7.83061	6.30924	8.30617
Rfx4	10;10;10;10;10;10;10;10;10;10;10;10;10;10;10;10;10;10;10;10;10;10;10;10;10;10;10;10;10;10;10;10;10;10;10;10;10;10;10;10;10;10;10;10;10;10;10;10;10;10;10;10;10;10;10;10;10;10;10;10;10;10;10;10;10	84756062;84762238;84762238;84780015;84780015;84780015;84798528;84798528;84798528;84814636;84814636;84814636;84834746;84835293;84835293;84838148;84838148;84840017;84840017;84840017;84840017;84840839;84840839;84840839;84840839;84844201;84844201;84844201;84844201;84858497;84858497;84858497;84858497;84860498;84860498;84860498;84860498;84863243;84863243;84863243;84863243;84868352;84868352;84868352;848…	84756513;84762324;84762385;84780101;84780101;84780101;84798588;84798588;84798588;84814670;84814670;84814759;84834877;84835354;84835354;84838279;84838279;84840230;84840230;84840230;84840230;84840916;84840916;84840916;84840916;84844364;84844364;84844364;84844364;84858597;84858597;84858597;84858597;84860556;84860556;84860556;84860556;84863387;84863387;84863387;84863387;84868446;84868446;84868446;848…	+;+;+;+;+;+;+;+;+;+;+;+;+;+;+;+;+;+;+;+;+;+;+;+;+;+;+;+;+;+;+;+;+;+;+;+;+;+;+;+;+;+;+;+;+;+;+;+;+;+;+;+;+;+;+;+;+;+;+;+;+;+;+;+;+	4724	0.00911066	0.0189747	0.00896536	0.0435513	0.0426405	0.0284949	0.0203965	0.0286824	0.0224949	0.0272009	0.0747635	0.00967796
Ric8b	10;10;10;10;10;10;10;10;10;10;10;10;10;10;10;10;10;10;10;10;10;10;10;10;10;10;10;10;10;10;10;10;10;10;10;10;10	84917616;84917654;84917656;84925546;84925546;84925546;84937393;84947412;84947412;84947412;84958016;84958016;84958016;84958016;84969863;84969863;84969863;84969863;84970729;84970729;84970729;84970729;84980048;84980048;84980048;84980048;84992120;84992120;84992120;84992120;85001782;85008716;85009452;85015076;85015076;85015076;85015076	84917825;84917825;84917825;84925593;84925593;84925593;84937451;84948020;84948020;84948020;84958110;84958110;84958110;84958110;84970091;84970091;84970091;84970091;84970824;84970824;84970824;84970824;84980192;84980192;84980192;84980192;84992264;84992264;84992168;84992264;85001901;85008793;85009627;85018337;85016209;85016447;85016447	+;+;+;+;+;+;+;+;+;+;+;+;+;+;+;+;+;+;+;+;+;+;+;+;+;+;+;+;+;+;+;+;+;+;+;+;+	5272	5.46964	6.3674	5.22978	5.80487	5.60706	5.94919	5.30014	5.73989	5.47254	6.03649	5.57949	5.6628
Fhl4	10;10;10;10	85096287;85097981;85102144;85102296	85099488;85099488;85102495;85102495	-;-;-;-	3554	0.0726597	0.075664	0.0238336	0.0144722	0.0425086	0.0505008	0.0677778	0.0889579	0.0149502	0.0241037	0.113573	0.102912
Tmem263	10;10;10;10;10;10;10	85102627;85102743;85110799;85110799;85114408;85114408;85120221	85102997;85102997;85110865;85110865;85117585;85114887;85120618	+;+;+;+;+;+;+	4014	2.81993	3.65112	3.00708	2.70368	2.28332	2.83931	3.18056	2.91425	2.88565	3.59603	3.23041	3.43972
Mterf2	10;10;10;10;10;10;10;10;10;10;10;10	85119433;85120499;85120548;85120610;85126368;85126368;85126368;85126368;85127115;85127962;85127962;85127962	85120814;85120814;85120814;85120814;85126465;85126486;85126577;85126486;85127208;85127995;85128027;85128027	-;-;-;-;-;-;-;-;-;-;-;-	1752	2.43198	2.71161	2.92502	3.7871	3.39172	3.22695	3.24476	3.63487	3.39663	2.93372	3.05263	2.6878
Cry1	10;10;10;10;10;10;10;10;10;10;10;10;10;10;10;10;10;10;10	85131700;85133051;85133242;85143016;85143639;85143724;85144154;85144154;85146344;85146736;85147907;85148437;85148614;85148703;85151213;85151213;85151228;85157086;85184314	85132307;85133158;85133313;85143168;85143841;85143841;85144441;85144305;85146655;85146876;85147995;85148798;85148798;85148798;85151356;85151355;85151308;85157194;85185064	-;-;-;-;-;-;-;-;-;-;-;-;-;-;-;-;-;-;-	3340	8.73661	6.89719	6.42894	7.8691	5.97065	8.19482	8.88524	9.95257	6.07689	7.23276	7.87033	9.22586
Btbd11	10;10;10;10;10;10;10;10;10;10;10;10;10;10;10;10;10;10;10;10;10;10;10;10;10;10;10;10;10;10;10;10;10;10;10;10;10;10;10;10;10;10;10;10;10;10;10;10;10;10;10;10;10;10;10;10;10;10;10;10;10;10;10;10	85386814;85386827;85546442;85546442;85561505;85561505;85598401;85598411;85598725;85598725;85598725;85598725;85605810;85624903;85624903;85624903;85627197;85627197;85627197;85629212;85629212;85629212;85629515;85631088;85631088;85631088;85631293;85631293;85631293;85632089;85632089;85632089;85633684;85633684;85633684;85633684;85639573;85640503;85640503;85640503;85640503;85640503;85645203;85645488;856…	85388478;85388478;85546591;85546591;85561709;85561709;85598577;85598577;85598877;85598877;85598877;85598877;85606049;85625068;85625068;85625068;85627286;85627286;85627286;85629313;85629313;85629313;85631181;85631181;85631181;85631181;85631428;85631428;85631428;85632309;85632309;85632309;85633862;85633862;85633862;85633862;85640194;85641636;85640608;85640608;85640594;85640608;85645590;85645590;856…	+;+;+;+;+;+;+;+;+;+;+;+;+;+;+;+;+;+;+;+;+;+;+;+;+;+;+;+;+;+;+;+;+;+;+;+;+;+;+;+;+;+;+;+;+;+;+;+;+;+;+;+;+;+;+;+;+;+;+;+;+;+;+;+	10033	0.193037	0.223354	0.173074	0.29221	0.175675	0.277279	0.211279	0.166562	0.174762	0.24761	0.176011	0.250626
Pwp1	10;10;10;10;10;10;10;10;10;10;10;10;10;10;10	85871831;85874278;85874449;85876298;85876486;85878479;85879262;85879830;85882003;85882871;85884463;85885610;85885797;85887223;85888030	85872014;85874336;85874633;85876383;85876582;85878589;85879392;85879891;85882099;85882932;85884574;85885700;85885918;85887328;85889103	+;+;+;+;+;+;+;+;+;+;+;+;+;+;+	2579	13.6175	14.7367	15.4695	14.5587	14.2152	16.4587	15.9343	15.6038	11.8875	16.0766	12.912	17.5146
Prdm4	10;10;10;10;10;10;10;10;10;10;10;10	85891970;85899175;85900842;85901704;85902927;85904131;85905349;85907276;85910223;85912838;85916524;85916808	85893439;85899343;85901156;85901831;85903012;85904270;85905498;85908070;85910408;85912971;85916729;85916945	-;-;-;-;-;-;-;-;-;-;-;-	3917	4.85655	5.44639	4.7791	4.37262	4.80829	5.10902	5.00583	5.30406	4.81547	5.32533	5.12662	5.3107
Ascl4	10;10;10;10	85927681;85928774;85943979;85946024	85929696;85929034;85944017;85946206	+;+;+;+	2238	1.44232	1.94253	2.10059	1.33296	2.31766	2.30565	1.85128	2.15937	1.21081	1.6842	1.73593	2.04284
Rtcb	10;10;10;10;10;10;10;10;10;10;10;10;10;10;10;10	85938637;85941899;85942488;85943209;85943815;85946191;85947177;85948860;85949466;85951355;85951355;85953437;85953437;85955719;85955719;85957615	85939119;85942018;85942598;85943397;85943990;85946350;85947333;85949622;85949622;85951454;85951454;85953504;85953504;85955779;85955797;85957823	-;-;-;-;-;-;-;-;-;-;-;-;-;-;-;-	2615	53.5886	54.4332	53.8029	52.9485	55.2884	59.4892	58.2907	56.2708	48.1346	61.079	53.7347	63.3593
Bpifc	10;10;10;10;10;10;10;10;10;10;10;10;10;10;10;10;10;10;10;10	85959340;85961993;85962994;85965223;85975372;85976194;85977701;85979177;85981246;85988719;85990983;85991154;85993328;85995901;85995945;86000516;86000516;86009343;86011785;86011785	85960541;85962069;85963057;85965265;85975439;85976364;85977754;85979353;85981337;85988779;85991046;85991309;85993456;85996065;85996065;86000639;86000639;86009432;86011856;86011895	-;-;-;-;-;-;-;-;-;-;-;-;-;-;-;-;-;-;-;-	2848	0.0755596	0.0157368	0.0594837	0.0361194	0.0530462	0.0157549	0	0	0	0.0150394	0.0177158	0
Fbxo7	10;10;10;10;10;10;10;10;10;10;10;10;10;10;10;10;10;10;10;10;10;10;10;10;10;10;10;10;10;10;10;10;10;10;10;10;10;10;10;10;10;10;10;10;10;10;10	86021972;86021987;86022019;86022189;86022197;86024416;86024416;86024568;86024568;86029009;86029009;86029009;86029009;86029009;86030928;86030928;86030928;86030928;86032971;86033234;86033234;86033234;86033234;86033234;86042452;86042922;86042922;86042922;86042922;86042922;86044423;86044423;86044423;86044423;86044423;86044423;86046773;86046773;86046773;86046773;86046773;86046773;86047722;86047722;860…	86022144;86022144;86022144;86022330;86022330;86024710;86024710;86024710;86024710;86029236;86029124;86029236;86029236;86029236;86031069;86031069;86031069;86031069;86033150;86033320;86033320;86033320;86033320;86033320;86043017;86043017;86043017;86043017;86043017;86043017;86044599;86044599;86044599;86044599;86044599;86044599;86046810;86046809;86046810;86046810;86046810;86046810;86051871;86048323;860…	+;+;+;+;+;+;+;+;+;+;+;+;+;+;+;+;+;+;+;+;+;+;+;+;+;+;+;+;+;+;+;+;+;+;+;+;+;+;+;+;+;+;+;+;+;+;+	6180	2.2564	1.85655	2.20671	2.15557	2.22457	2.57748	2.82199	2.76253	2.50189	2.33568	2.26148	2.26374
Syn3	10;10;10;10;10;10;10;10;10;10;10;10;10;10;10;10;10;10;10;10;10;10;10;10;10;10;10;10;10;10;10;10;10;10;10;10;10;10;10;10;10;10;10;10;10;10;10	86055125;86057371;86057423;86063962;86063962;86064796;86064796;86066741;86069026;86070502;86073226;86080207;86080207;86134986;86134986;86291593;86347774;86351145;86351551;86351551;86351551;86354346;86354346;86354346;86354346;86354346;86407613;86407613;86407613;86407613;86407613;86448866;86448866;86448866;86448866;86448866;86466979;86466979;86466979;86466979;86466979;86477666;86491754;86491754;864…	86055664;86057662;86057662;86064049;86064049;86064930;86064930;86066843;86069128;86073300;86073300;86080349;86080349;86135048;86135048;86294651;86351640;86351640;86351640;86351640;86351640;86354502;86354502;86354502;86354502;86354502;86407704;86407704;86407704;86407704;86407704;86448923;86448923;86448923;86448923;86448923;86467435;86467435;86467435;86467435;86467435;86477740;86491897;86491897;864…	-;-;-;-;-;-;-;-;-;-;-;-;-;-;-;-;-;-;-;-;-;-;-;-;-;-;-;-;-;-;-;-;-;-;-;-;-;-;-;-;-;-;-;-;-;-;-	12282	9.41232	14.9175	10.6588	10.3019	10.3448	10.1854	10.8693	11.466	12.6149	13.0568	12.2789	6.67056
Timp3	10;10;10;10;10;10;10;10;10;10;10;10	86300372;86300554;86300556;86302854;86303835;86326580;86338373;86338373;86343933;86343933;86344554;86345705	86300974;86300974;86300974;86303073;86306781;86326834;86338455;86338455;86343981;86344044;86344675;86349506	+;+;+;+;+;+;+;+;+;+;+;+	8144	23.7284	39.4912	28.7896	28.338	31.1649	30.7324	27.1347	27.3243	31.016	37.0312	29.6322	18.9353
Gm5174	10	86655939	86657381	+	1443	0	0	0	0	0	0	0	0	0	0.0593656	0	0
Hsp90b1	10;10;10;10;10;10;10;10;10;10;10;10;10;10;10;10;10;10;10;10;10;10;10;10;10;10;10;10;10;10;10;10;10;10;10;10;10;10;10;10;10;10;10;10	86690209;86690840;86691629;86691629;86692140;86692386;86692386;86692401;86693377;86693377;86693377;86693914;86693914;86693914;86694021;86694350;86694350;86694350;86694350;86695477;86695477;86695477;86695477;86695660;86695660;86695660;86695826;86695826;86695826;86696719;86696719;86698319;86698319;86698319;86698584;86698584;86701697;86701697;86701946;86702909;86702909;86703460;86704294;86705307	86691128;86691128;86692295;86691748;86692295;86692464;86692464;86692464;86693513;86693513;86693513;86694159;86694159;86694159;86694159;86694619;86694619;86694619;86694619;86695721;86695542;86695542;86695542;86695737;86695737;86695737;86695963;86695963;86695963;86696835;86696835;86698438;86698438;86698438;86698695;86698695;86701968;86702028;86702028;86703093;86703025;86703601;86704396;86705509	-;-;-;-;-;-;-;-;-;-;-;-;-;-;-;-;-;-;-;-;-;-;-;-;-;-;-;-;-;-;-;-;-;-;-;-;-;-;-;-;-;-;-;-	4032	1001.83	1196.2	1075.82	860.13	997.74	916.018	885.756	894.276	945.535	1110.6	937.617	1237.34
Ttc41	10;10;10;10;10;10;10;10;10;10;10;10;10;10;10;10;10;10;10;10;10	86705811;86705811;86707236;86712765;86712765;86719478;86719478;86724198;86724198;86729782;86730831;86733555;86736801;86744426;86750247;86758258;86759089;86760766;86763864;86775930;86776155	86706017;86706017;86707344;86713739;86713739;86719664;86719664;86724412;86724584;86729942;86731266;86733794;86736999;86744604;86750386;86758429;86759236;86760918;86763997;86776059;86776843	+;+;+;+;+;+;+;+;+;+;+;+;+;+;+;+;+;+;+;+;+	4646	0.926361	0.983958	0.966283	1.18455	1.09475	0.791937	0.850295	1.15684	0.903467	0.931137	1.07512	0.875799
Fabp3-ps1	10	86731754	86732409	-	656	2.95235	1.22977	1.22667	1.72492	0.76766	1.84678	3.15791	2.20318	1.45792	1.17528	1.76899	2.09079
Nt5dc3	10;10;10;10;10;10;10;10;10;10;10;10;10;10	86779005;86804781;86811530;86812325;86815854;86816953;86820207;86820668;86820910;86823064;86824187;86825155;86831700;86833931	86779311;86804965;86811604;86812380;86815944;86817090;86820267;86820770;86821011;86823145;86824273;86825295;86831764;86838389	+;+;+;+;+;+;+;+;+;+;+;+;+;+	5952	1.79328	1.61141	1.52275	2.22086	1.3368	1.9902	2.11258	1.82118	1.6247	1.80627	1.47499	1.87422
Stab2	10;10;10;10;10;10;10;10;10;10;10;10;10;10;10;10;10;10;10;10;10;10;10;10;10;10;10;10;10;10;10;10;10;10;10;10;10;10;10;10;10;10;10;10;10;10;10;10;10;10;10;10;10;10;10;10;10;10;10;10;10;10;10;10;10;10;10;10;10	86841203;86843501;86846030;86846868;86848025;86848934;86850557;86850778;86853545;86855100;86856546;86858108;86859744;86861368;86863448;86864992;86866611;86867148;86869022;86870191;86871812;86872597;86873824;86875480;86878830;86883784;86885628;86887772;86890729;86891605;86894004;86896498;86897940;86899792;86901572;86905516;86907138;86907333;86919016;86922082;86922867;86924397;86926597;86927817;869…	86841658;86843617;86846158;86846975;86848165;86849053;86850663;86850940;86853678;86855241;86856739;86858215;86859848;86861517;86863577;86865048;86866757;86867237;86869198;86870250;86871952;86872743;86873907;86875527;86878949;86883855;86885701;86887897;86890805;86891650;86894099;86896693;86898032;86899848;86901700;86905647;86907245;86907431;86919093;86922196;86923003;86924444;86926692;86927912;869…	-;-;-;-;-;-;-;-;-;-;-;-;-;-;-;-;-;-;-;-;-;-;-;-;-;-;-;-;-;-;-;-;-;-;-;-;-;-;-;-;-;-;-;-;-;-;-;-;-;-;-;-;-;-;-;-;-;-;-;-;-;-;-;-;-;-;-;-;-	8140	0.211493	0.275297	0.15609	0.176923	0.266021	0.19293	0.295924	0.255233	0.189294	0.315717	0.204546	0.381925
1700113H08Rik	10;10;10;10;10;10;10;10;10;10;10;10;10	87058045;87058046;87073958;87073958;87121410;87121410;87165023;87165023;87205979;87225877;87230006;87230006;87230006	87058159;87058159;87074051;87074051;87121478;87121478;87165134;87165134;87206194;87226236;87230588;87230587;87230589	+;+;+;+;+;+;+;+;+;+;+;+;+	1550	0	0.028915	0.0273241	0.0331833	0	0.0289484	0	0	0	0	0.0325514	0
Ascl1	10;10	87491041;87492353	87491991;87493660	-;-	2259	0.0381042	0.0198399	0.0187483	0	0	0	0	0	0.0235206	0.0948036	0.022335	0.0404769
Pah	10;10;10;10;10;10;10;10;10;10;10;10;10	87521795;87528299;87538142;87554346;87563402;87567274;87570208;87571226;87576157;87578260;87578853;87581848;87583532	87522076;87528406;87538325;87554434;87563469;87567470;87570343;87571295;87576213;87578355;87578986;87581963;87584129	+;+;+;+;+;+;+;+;+;+;+;+;+	2135	0.282221	0.230914	0.0793487	0.240909	0.0707613	0.273213	0.248216	0.211547	0.199093	0.220682	0.189057	0.364036
Igf1	10;10;10;10;10;10;10;10;10;10;10;10;10;10;10;10;10;10;10;10;10;10;10;10;10;10;10;10;10;10;10;10;10;10;10;10;10	87858265;87859068;87859258;87859331;87859490;87859611;87860030;87860606;87861296;87861296;87861329;87864731;87864731;87864731;87864731;87864731;87864731;87864731;87864731;87913619;87913619;87913619;87913619;87913619;87913619;87913619;87913619;87915298;87915298;87915298;87915298;87930675;87930675;87930675;87930675;87930675;87930675	87859013;87859412;87859412;87859412;87859639;87859639;87861385;87861385;87861385;87861385;87861385;87864887;87864887;87864887;87864887;87864887;87864887;87864887;87864887;87913800;87913800;87913800;87913800;87913800;87913800;87913800;87913800;87915349;87915349;87915894;87915349;87930899;87930877;87930893;87931801;87937042;87930895	+;+;+;+;+;+;+;+;+;+;+;+;+;+;+;+;+;+;+;+;+;+;+;+;+;+;+;+;+;+;+;+;+;+;+;+;+	9904	7.58306	6.95987	9.1085	6.51754	5.63889	9.33281	7.50568	9.61767	8.33154	7.2007	9.56215	8.22604
Pmch	10;10;10	88091072;88091688;88092140	88091385;88091886;88092375	+;+;+	749	1.55146	3.23123	2.03563	1.03005	1.61362	1.37785	0.900494	1.38692	1.48971	1.82995	1.0778	1.52599
Parpbp	10;10;10;10;10;10;10;10;10;10;10;10;10;10;10;10;10;10;10;10;10;10;10;10;10;10;10	88091432;88093595;88110299;88111596;88114521;88124808;88126157;88126210;88126230;88133094;88133094;88133094;88133151;88139866;88139866;88139866;88139866;88143940;88143940;88143940;88143940;88146496;88146496;88146496;88146852;88146852;88146852	88093186;88093727;88110380;88111774;88114701;88124962;88126327;88126327;88126327;88133198;88133198;88133198;88133198;88140096;88140096;88140096;88140096;88144095;88144095;88144095;88144095;88146648;88146578;88146941;88146933;88146878;88146878	-;-;-;-;-;-;-;-;-;-;-;-;-;-;-;-;-;-;-;-;-;-;-;-;-;-;-	3594	1.79627	2.07007	2.3097	1.31662	1.65339	2.02252	1.87666	1.80962	1.87754	1.96642	1.69867	2.02261
Nup37	10;10;10;10;10;10;10;10;10;10;10;10;10;10;10;10;10;10;10;10	88146992;88147071;88148162;88148162;88153524;88153524;88158858;88158858;88160876;88160876;88171995;88171995;88174386;88174386;88174883;88174883;88177073;88177073;88178134;88178134	88147072;88147169;88148379;88148379;88153648;88153648;88158930;88158930;88160970;88160970;88172085;88172085;88174567;88174567;88174933;88174933;88177166;88177166;88178388;88178388	+;+;+;+;+;+;+;+;+;+;+;+;+;+;+;+;+;+;+;+	1362	3.22317	3.61969	4.94422	2.71898	3.77134	3.85447	4.5276	4.11196	3.62802	3.01902	3.96377	4.43088
Ccdc53	10;10;10;10;10;10;10;10;10;10;10;10;10;10;10;10;10;10;10;10;10;10;10;10;10;10;10;10;10;10;10;10;10;10;10;10;10;10;10;10;10	88201093;88201146;88201152;88201171;88201184;88201263;88201812;88201812;88201812;88201812;88201812;88204546;88213179;88213647;88213647;88213647;88213647;88213647;88213647;88213647;88215967;88215967;88215967;88215967;88215967;88215983;88219250;88219250;88219250;88219253;88219253;88225032;88225032;88234394;88234394;88234394;88234554;88235429;88245756;88245756;88245756	88201292;88201292;88201292;88201292;88201910;88201292;88201910;88201910;88201910;88201910;88201910;88204743;88213291;88215767;88213712;88213712;88213712;88213712;88213712;88213712;88216074;88216074;88216065;88216074;88216074;88216074;88219360;88219360;88219360;88219360;88219360;88225141;88225362;88234458;88234458;88234458;88234660;88235589;88246007;88246006;88246158	+;+;+;+;+;+;+;+;+;+;+;+;+;+;+;+;+;+;+;+;+;+;+;+;+;+;+;+;+;+;+;+;+;+;+;+;+;+;+;+;+	4536	4.23176	4.55495	4.95792	4.2068	4.49629	4.85696	3.99346	4.49063	5.18913	4.95744	5.29463	4.12234
Dram1	10;10;10;10;10;10;10;10;10;10;10;10;10;10;10;10;10;10	88322804;88322804;88325334;88325334;88329083;88329083;88336811;88336811;88340520;88340520;88340563;88344644;88344644;88344644;88356758;88356792;88359379;88379015	88324785;88324785;88325426;88325426;88329141;88329141;88336988;88336988;88340662;88340662;88340662;88344711;88344711;88344711;88356996;88357075;88359516;88379080	-;-;-;-;-;-;-;-;-;-;-;-;-;-;-;-;-;-	3045	0.904591	1.5749	1.4187	1.21617	0.959209	1.03149	0.94929	0.800959	1.58788	1.11125	1.12674	1.33628
Gnptab	10;10;10;10;10;10;10;10;10;10;10;10;10;10;10;10;10;10;10;10;10;10;10;10;10;10;10;10;10;10;10;10;10;10;10;10;10;10;10;10;10;10;10;10;10;10;10;10;10;10;10;10;10;10;10;10;10;10;10;10;10;10;10;10;10;10;10;10	88379132;88379224;88379224;88379226;88379469;88379469;88400652;88400652;88400652;88411916;88411916;88411916;88411916;88412605;88412605;88412605;88412605;88414393;88414393;88414393;88414393;88419125;88419125;88419426;88419426;88428493;88428493;88429461;88429461;88429566;88429840;88429840;88429840;88431333;88431333;88431333;88432441;88432441;88432441;88433049;88433049;88433137;88433361;88436002;884…	88379296;88379535;88379314;88379535;88379535;88379535;88400737;88400737;88400737;88412035;88412035;88412035;88412035;88412646;88412646;88412646;88412646;88414598;88414555;88414598;88414598;88419189;88419189;88419560;88419560;88428654;88428654;88429640;88429640;88429640;88430010;88430010;88430010;88431456;88431456;88431456;88432644;88432644;88432644;88434088;88434088;88433288;88434088;88436201;884…	+;+;+;+;+;+;+;+;+;+;+;+;+;+;+;+;+;+;+;+;+;+;+;+;+;+;+;+;+;+;+;+;+;+;+;+;+;+;+;+;+;+;+;+;+;+;+;+;+;+;+;+;+;+;+;+;+;+;+;+;+;+;+;+;+;+;+;+	5883	7.2792	8.10584	7.57346	7.82483	8.72264	9.36603	7.4357	7.7233	7.07175	8.59121	6.94685	7.9112
Chpt1	10;10;10;10;10;10;10;10;10;10;10;10;10;10;10;10;10;10;10;10;10;10;10;10;10;10;10;10;10;10;10;10;10;10;10;10;10;10;10;10;10;10;10;10;10;10;10;10;10;10;10;10;10;10;10;10;10;10;10;10;10;10	88452745;88453004;88469514;88471388;88472419;88472817;88472817;88472839;88475333;88475426;88475426;88475426;88475426;88476348;88476348;88476348;88476348;88476348;88476348;88476348;88477010;88477010;88477010;88477010;88477010;88477010;88480815;88480815;88480815;88480815;88480815;88480815;88481353;88481353;88482231;88482231;88482231;88482231;88482231;88485593;88487042;88488382;88488382;88488382;884…	88453097;88453097;88472984;88471460;88472984;88475536;88475536;88472984;88475536;88475536;88475536;88475536;88475536;88476473;88476473;88476473;88476473;88476473;88476440;88476473;88477168;88477168;88477168;88477168;88477168;88477168;88480946;88480946;88480946;88480946;88480946;88480872;88481379;88481379;88482315;88482315;88482315;88482315;88482315;88486011;88487262;88488523;88488523;88488523;884…	-;-;-;-;-;-;-;-;-;-;-;-;-;-;-;-;-;-;-;-;-;-;-;-;-;-;-;-;-;-;-;-;-;-;-;-;-;-;-;-;-;-;-;-;-;-;-;-;-;-;-;-;-;-;-;-;-;-;-;-;-;-	8324	4.13635	4.0274	3.60229	3.60236	3.70852	3.3798	3.86037	4.5035	3.73412	3.94156	3.61257	3.24051
Sycp3	10;10;10;10;10;10;10;10;10;10;10;10;10;10;10;10;10;10;10;10;10;10;10;10;10	88459569;88459664;88459664;88462461;88462461;88462461;88463363;88463363;88463363;88463836;88463836;88463836;88466439;88466439;88467283;88467283;88467283;88469546;88469546;88469546;88472676;88472676;88472676;88472905;88472905	88459712;88459712;88459712;88462603;88462603;88462603;88463426;88463426;88463426;88463870;88463870;88463870;88466556;88466556;88467382;88467382;88467382;88469644;88469644;88469644;88473236;88472780;88472780;88473236;88473235	+;+;+;+;+;+;+;+;+;+;+;+;+;+;+;+;+;+;+;+;+;+;+;+;+	1264	3.43901	2.3402	2.74754	2.60426	1.71314	2.1654	3.58274	4.28784	1.97567	1.66043	1.87608	2.17019
Mybpc1	10;10;10;10;10;10;10;10;10;10;10;10;10;10;10;10;10;10;10;10;10;10;10;10;10;10;10;10;10;10;10;10;10;10;10;10;10;10;10;10;10;10;10;10;10;10;10;10;10;10;10;10;10;10;10;10;10;10;10;10;10;10;10;10;10;10;10;10;10;10;10;10;10;10;10;10;10;10;10;10;10;10;10;10;10;10;10	88518279;88518282;88518339;88519387;88519901;88519901;88521277;88522967;88522967;88522967;88522967;88524969;88524969;88524969;88526282;88526282;88526282;88526282;88526373;88529425;88529425;88529425;88529425;88529425;88531669;88531669;88531669;88531669;88531669;88533485;88533485;88533485;88533485;88533485;88536315;88536315;88536315;88536315;88536315;88537466;88540949;88540949;88540949;88542328;885…	88518569;88518569;88518569;88519701;88519943;88519943;88521335;88523278;88523153;88523153;88523153;88525105;88525105;88525105;88526441;88526441;88526441;88526441;88526441;88529564;88529564;88529564;88529564;88529564;88531864;88531864;88531864;88531864;88531864;88533573;88533573;88533573;88533573;88533573;88536534;88536482;88536482;88536482;88536482;88537519;88541083;88541083;88541083;88542516;885…	-;-;-;-;-;-;-;-;-;-;-;-;-;-;-;-;-;-;-;-;-;-;-;-;-;-;-;-;-;-;-;-;-;-;-;-;-;-;-;-;-;-;-;-;-;-;-;-;-;-;-;-;-;-;-;-;-;-;-;-;-;-;-;-;-;-;-;-;-;-;-;-;-;-;-;-;-;-;-;-;-;-;-;-;-;-;-	4527	0.0190142	0.0198004	0.0093555	0.0568081	0.011124	0	0.010642	0.00997685	0.0117369	0.643383	0	0.0201982
Spic	10;10;10;10;10;10;10;10;10;10;10;10;10;10;10;10;10;10;10;10;10;10	88674772;88675272;88675890;88676873;88677500;88677500;88677500;88677811;88678524;88678524;88678524;88679859;88679859;88679859;88680479;88680479;88680479;88680479;88682975;88682975;88682975;88684966	88676070;88676070;88676070;88676965;88677608;88677608;88677608;88679955;88678636;88678636;88678636;88679955;88679955;88679955;88680574;88680574;88680574;88680574;88683023;88683023;88683023;88685015	-;-;-;-;-;-;-;-;-;-;-;-;-;-;-;-;-;-;-;-;-;-	3841	0.481819	0.443399	0.430029	0.388333	0.314659	0.467274	0.627134	0.599694	0.567158	0.490659	0.840693	0.690363
[truncated: 34,060 more rows]

## Sheet: heat map
id	ave(logCTR)	ave(logM)	ave(logVM)	ave(logPM)
[truncated: 435 more rows]
