# Supplementary material for: Whole Cancer Cell Vaccine Protects Ovarian Functions in Tumor-bearing Mice through Downregulating CXCL10
Source: Research Square preprint supplement (doi:10.21203/rs.3.rs-3838016/v1), 2024-10-02
Supplement: Supplementary file 3 [file de2859ec584d7c2493ff5224.xlsx]

## Sheet: Peptides
Sequence	Length	Missed cleavages	Mass	Proteins	Leading razor protein	Start position	End position	Gene names	Protein names	Unique (Groups)	Unique (Proteins)	Charges	PEP	Score	Intensity	Intensity GST beads+Ovary lysate	Intensity CXCL10-GST-beads+Ovary lysate	LFQ intensity GST beads+Ovary lysate	LFQ intensity CXCL10-GST-beads+Ovary lysate
AIGKLEIIPASLSCPR	16	1	1723.97	D3YW23;CXCL10;P17515	D3YW23	44	59	Cxcl10	C-X-C motif chemokine;C-X-C motif chemokine 10	yes	no	2;3;4	0	203.61	17837000000	0	17296000000	0	88871000000
AFSQKR	6	1	735.403	D3YW23;CXCL10;P17515;Q9D1T8;E9Q707;Q9CXE0	D3YW23	88	93	Cxcl10;Prdm5	C-X-C motif chemokine;C-X-C motif chemokine 10;PR domain zinc finger protein 5	yes	no	2	6.1454e-39	154.91	441190000	0	441190000	0	2266900000
VEIIATMKK	9	1	1031.6	D3YW23;CXCL10;P17515	D3YW23	60	68	Cxcl10	C-X-C motif chemokine;C-X-C motif chemokine 10	yes	no	2;3	7.0528e-27	145.63	7672100000	0	7535700000	0	38719000000
VEIIATMK	8	0	903.51	D3YW23;CXCL10;P17515	D3YW23	60	67	Cxcl10	C-X-C motif chemokine;C-X-C motif chemokine 10	yes	no	1;2	2.0399e-67	136.11	8586300000	0	8473000000	0	43535000000
AIGKLEIIPASLSCPRVEIIATMK	24	2	2609.46	D3YW23;CXCL10;P17515	D3YW23	44	67	Cxcl10	C-X-C motif chemokine;C-X-C motif chemokine 10	yes	no	2;3;4	2.4328e-71	133.95	2291700000	0	2166200000	0	11130000000
LEIIPASLSCPR	12	0	1354.73	D3YW23;CXCL10;P17515	D3YW23	48	59	Cxcl10	C-X-C motif chemokine;C-X-C motif chemokine 10	yes	no	2;3	1.0456e-24	121.6	5430500000	0	5377800000	0	27632000000
CNCIHIDDGPVR	12	0	1454.64	D3YW23;CXCL10;P17515	D3YW23	30	41	Cxcl10	C-X-C motif chemokine;C-X-C motif chemokine 10	yes	no	2;3	8.1778e-14	111.27	891210000	0	856800000	0	4402300000
TIKNLMK	7	1	846.5	D3YW23;CXCL10;P17515	D3YW23	81	87	Cxcl10	C-X-C motif chemokine;C-X-C motif chemokine 10	yes	no	1;2	4.7875e-33	107.43	228320000	0	228320000	0	1173100000
LEIIPASLSCPRVEIIATMK	20	1	2240.23	D3YW23;CXCL10;P17515	D3YW23	48	67	Cxcl10	C-X-C motif chemokine;C-X-C motif chemokine 10	yes	no	2	1.015e-05	78.69	30876000	0	30876000	0	158650000
VEIIATMKKNDEQR	14	2	1673.88	D3YW23;CXCL10;P17515	D3YW23	60	73	Cxcl10	C-X-C motif chemokine;C-X-C motif chemokine 10	yes	no	3	0.0091694	50.155	1635100	0	1635100	0	8401500
VFRPETKEEFSK	12	2	1495.77	P24815	P24815	38	49	Hsd3b1	3 beta-hydroxysteroid dehydrogenase/Delta 5-->4-isomerase type 1;3-beta-hydroxy-Delta(5)-steroid dehydrogenase;Steroid Delta-isomerase	yes	yes	2	0	272.15	63738000	63738000	0	63738000	0
TIGGGDDSFNTFFSETGAGK	20	0	2006.89	P68373;P68369;P05213;A0A2R8VHF3;P05214	P68373	41	60	Tuba1c;Tuba1a;Tuba1b;Tuba3a	Tubulin alpha-1C chain;Tubulin alpha-1A chain;Tubulin alpha-1B chain;Tubulin alpha-3 chain	yes	no	2	0	242.43	30450000	30450000	0	30450000	0
MLLEYTDSSYDEKR	14	1	1748.79	A2AE89;P10649	A2AE89	19	32	Gstm1	Glutathione S-transferase Mu 1	yes	no	2;3	0	234.72	373470000	373470000	0	373470000	0
DASILFSCEGPNPER	15	0	1690.76	Q9QZ82	Q9QZ82	103	117	Cyp11a1	Cholesterol side-chain cleavage enzyme, mitochondrial	yes	yes	2	0	220.25	36712000	36712000	0	36712000	0
KASGPPVSELITK	13	1	1325.76	P15864;P43277	P15864	34	46	Hist1h1c;Hist1h1d	Histone H1.2;Histone H1.3	no	no	2;3	1.65e-239	213.99	76828000	76828000	0	76828000	0
EHALLAYTLGVK	12	0	1313.73	P10126;D3YZ68;D3Z3I8;P62631	P10126	135	146	Eef1a1;Eef1a2	Elongation factor 1-alpha 1;Elongation factor 1-alpha 2	no	no	2;3	0	207.34	402600000	402600000	0	402600000	0
GVVDSEDLPLNISR	14	0	1512.78	P11499;E9Q3D6;P07901	P11499	379	392	Hsp90ab1;Hsp90aa1	Heat shock protein HSP 90-beta;Heat shock protein HSP 90-alpha	no	no	2	0	204.17	224850000	224850000	0	224850000	0
ATVAATTKVPEIR	13	1	1355.78	Q9WTM5;A0A1B0GSR4;A0A1B0GRW3	Q9WTM5	2	14	Ruvbl2	RuvB-like 2	yes	no	2	6.1929e-213	185.77	16370000	16370000	0	16370000	0
HLEINPDHSIIETLR	15	0	1785.94	P07901	P07901	634	648	Hsp90aa1	Heat shock protein HSP 90-alpha	yes	yes	2;3;4	0	185.67	74518000	74518000	0	74518000	0
THINIVVIGHVDSGK	15	0	1587.87	P10126;D3YZ68;D3Z3I8;P62631	P10126	6	20	Eef1a1;Eef1a2	Elongation factor 1-alpha 1;Elongation factor 1-alpha 2	no	no	2;3;4	4.2438e-204	181.98	152530000	152530000	0	152530000	0
AVFPSIVGRPR	11	1	1197.7	P63260;P60710;E9Q5F4;E9Q1F2;P63268;P68134;P68033;P62737;G3UZ07;G3UYG0;E9Q606;B1ATY1;A0A1D5RM20;D3Z2K3;A0A494B9T3;D3YZY0;F6WX90;E9Q2D1	P63260	29	39	Actg1;Actb;Actg2;Acta1;Actc1;Acta2	Actin, cytoplasmic 2;Actin, cytoplasmic 2, N-terminally processed;Actin, cytoplasmic 1;Actin, cytoplasmic 1, N-terminally processed;Actin, gamma-enteric smooth muscle;Actin, alpha skeletal muscle;Actin, alpha cardiac muscle 1;Actin, aortic smooth muscle	yes	no	2;3	3.1249e-65	178.94	118950000	118950000	0	118950000	0
STLINSLFLTDLYPER	16	0	1880.99	D3Z1S1;F6WYM0;D3YYB1;D3Z3C0;P42208;D3YV76;F6UKN5;D3YZU7;E9Q3V6	D3Z1S1	81	96	Sept2	Septin-2	yes	no	2	2.8098e-179	176.29	22576000	22576000	0	22576000	0
YLTVAAVFR	9	0	1038.59	P99024;Q9D6F9;P68372	P99024	310	318	Tubb5;Tubb4a;Tubb4b	Tubulin beta-5 chain;Tubulin beta-4A chain;Tubulin beta-4B chain	no	no	2	2.1247e-130	173.59	32892000	32892000	0	32892000	0
VNADEVGGEALGR	13	0	1285.63	A8DUK4;E9Q223	A8DUK4	19	31	Hbbt1;Hbb-bs		yes	no	2	8.8079e-144	172.8	573770000	573770000	0	573770000	0
IEIESFFEGEDFSETLTR	18	0	2147.99	P20029	P20029	308	325	Hspa5	78 kDa glucose-regulated protein	yes	yes	2	0	171.73	0	0	0	0	0
LIDLHSPSEIVK	12	0	1349.76	P60867	P60867	88	99	Rps20	40S ribosomal protein S20	yes	yes	2;3	2.8911e-41	169.65	129340000	129340000	0	129340000	0
KHPDASVNFSEFSKK	15	2	1719.86	A0A0J9YUZ4;P63158;A0A0J9YUD8;D3YZ18;D3YVC6	A0A0J9YUZ4	44	58	Hmgb1	High mobility group protein B1	yes	no	3;4	2.079e-156	169.09	142410000	142410000	0	142410000	0
AGTVVLDDVELR	12	0	1285.69	P25206	P25206	2	13	Mcm3	DNA replication licensing factor MCM3	yes	yes	2	2.5532e-113	168.83	42789000	42789000	0	42789000	0
TIEYLEEVAVNFAK	14	0	1624.83	Q8BMS1	Q8BMS1	236	249	Hadha	Trifunctional enzyme subunit alpha, mitochondrial;Long-chain enoyl-CoA hydratase;Long chain 3-hydroxyacyl-CoA dehydrogenase	yes	yes	2	7.545e-125	168.79	45644000	45644000	0	45644000	0
TAVVVGTVTDDVR	13	0	1330.71	A0A1B0GSF7;A0A1B0GQU8;P35980;A0A1B0GRZ3;A0A1B0GS28;A0A1B0GSA8	A0A1B0GSF7	27	39	Rpl18	60S ribosomal protein L18	yes	no	2	1.9795e-123	166.97	47753000	47753000	0	47753000	0
IKGEHPGLSIGDVAK	15	1	1519.84	A0A0J9YUZ4;P63158;A0A0J9YUD8	A0A0J9YUZ4	127	141	Hmgb1	High mobility group protein B1	yes	no	2;3;4	3.3771e-52	161.04	1105800000	1105800000	0	1105800000	0
AAGVEAAAEVAATEPK	16	0	1483.75	Q9D0E1;B8JK33;B8JK32	Q9D0E1	2	17	Hnrnpm	Heterogeneous nuclear ribonucleoprotein M	yes	no	2	1.563e-119	160.52	22790000	22790000	0	22790000	0
FAGGDYTTTIEAFISASGR	19	0	1962.93	Q8CGC7	Q8CGC7	1216	1234	Eprs	Bifunctional glutamate/proline--tRNA ligase;Glutamate--tRNA ligase;Proline--tRNA ligase	yes	yes	2;3	6.4834e-46	159.02	41399000	41399000	0	41399000	0
FLSKPIFAK	9	1	1049.63	P15626;D3YX76	P15626	203	211	Gstm2	Glutathione S-transferase Mu 2	yes	no	2	5.1424e-62	158.61	104320000	104320000	0	104320000	0
EVDDLGPEVGDIK	13	0	1384.67	A0A0G2JGQ5;A0A0G2JG10;Q497W9;O35286	A0A0G2JGQ5	162	174	Dhx15	Pre-mRNA-splicing factor ATP-dependent RNA helicase DHX15	yes	no	2	2.834e-90	157.38	32997000	32997000	0	32997000	0
YGPIVDVYVPLDFYTR	16	0	1915.97	Q3TFP0;Q9R0U0	Q3TFP0	33	48	Srsf10	Serine/arginine-rich splicing factor 10	yes	no	2	4.4224e-103	156.69	85776000	85776000	0	85776000	0
GFGFVDFNSEEDAK	14	0	1560.67	P09405	P09405	608	621	Ncl	Nucleolin	yes	yes	2	1.3844e-90	156.48	68361000	68361000	0	68361000	0
GHYTEGAELVDSVLDVVR	18	0	1957.97	P99024;Q9CWF2;Q7TMM9;Q9ERD7;G3UZR1;Q922F4;P68372	P99024	104	121	Tubb5;Tubb2b;Tubb2a;Tubb3;Tubb6;Tubb4b	Tubulin beta-5 chain;Tubulin beta-2B chain;Tubulin beta-2A chain;Tubulin beta-3 chain;Tubulin beta-6 chain;Tubulin beta-4B chain	no	no	2;3	3.2906e-33	153.38	155000000	155000000	0	155000000	0
GLSEDTTEETLKESFEGSVR	20	1	2213.03	P09405	P09405	575	594	Ncl	Nucleolin	yes	yes	2;3	2.724e-117	153.21	165940000	165940000	0	165940000	0
YTMGDAPDFDR	11	0	1286.52	A2AE89;P10649	A2AE89	33	43	Gstm1	Glutathione S-transferase Mu 1	yes	no	2	9.5213e-66	153.05	81043000	81043000	0	81043000	0
VIFLEDDDVAAVVDGR	16	0	1731.87	P47856	P47856	289	304	Gfpt1	Glutamine--fructose-6-phosphate aminotransferase [isomerizing] 1	yes	yes	2	2.8604e-88	152.14	44802000	44802000	0	44802000	0
SFKEFLLSLDDSVDETEAVKR	21	2	2427.22	Q99MR6;A0A0G2JDN3;A0A1Y7VNN4	Q99MR6	151	171	Srrt	Serrate RNA effector molecule homolog	yes	no	3;4	1.388e-104	150.98	83538000	83538000	0	83538000	0
TLTAVHDAILEDLVFPSEIVGKR	23	1	2522.37	P62082	P62082	121	143	Rps7	40S ribosomal protein S7	yes	yes	3;4	2.7617e-105	149.44	274590000	274590000	0	274590000	0
GHYTEGAELVDSVLDVVRK	19	1	2086.07	P99024;Q9CWF2;Q7TMM9;Q9ERD7;G3UZR1;Q922F4;P68372	P99024	104	122	Tubb5;Tubb2b;Tubb2a;Tubb3;Tubb6;Tubb4b	Tubulin beta-5 chain;Tubulin beta-2B chain;Tubulin beta-2A chain;Tubulin beta-3 chain;Tubulin beta-6 chain;Tubulin beta-4B chain	no	no	3;4	1.3519e-220	148.44	222840000	222840000	0	222840000	0
TIISYIDEQFER	12	0	1512.75	D3Z1S1;F6WYM0;D3YYB1;D3Z3C0;P42208;F6UKN5;E9Q3V6	D3Z1S1	147	158	Sept2	Septin-2	yes	no	2	0	148.32	0	0	0	0	0
TKDIEDVFYK	10	1	1256.63	H7BX95;Q6PDM2	H7BX95	29	38	Srsf1	Serine/arginine-rich splicing factor 1	yes	no	2	2.5882e-12	147.75	187240000	187240000	0	187240000	0
HLEINPDHPIVETLR	15	0	1781.94	P11499	P11499	625	639	Hsp90ab1	Heat shock protein HSP 90-beta	yes	yes	2;3;4	1.7017e-119	147.56	126740000	126740000	0	126740000	0
AVFVDLEPTVIDEVR	15	0	1700.9	P68373;P68369;P05213;A0A2R8VHF3	P68373	65	79	Tuba1c;Tuba1a;Tuba1b	Tubulin alpha-1C chain;Tubulin alpha-1A chain;Tubulin alpha-1B chain	yes	no	2	1.2241e-74	147.26	458800000	426840000	31964000	426840000	164240000
LGTLESVYIVDPK	13	0	1432.78	Q9QZ82	Q9QZ82	90	102	Cyp11a1	Cholesterol side-chain cleavage enzyme, mitochondrial	yes	yes	2	2.1659e-16	147.19	399560000	399560000	0	399560000	0
LGLDFPNLPYLIDGSHK	17	0	1897.99	A2AE89;P10649;A2AE91;P15626;D3YX76;D3YVP6;Q80W21;E9QAC8;D3YVP5;Q8R5I6;D3YZ29	A2AE89	53	69	Gstm1;Gstm4;Gstm2;Gstm7	Glutathione S-transferase Mu 1;Glutathione S-transferase Mu 2;Glutathione S-transferase Mu 7	no	no	2;3	3.5617e-64	146.3	892110000	892110000	0	892110000	0
GTTITLVLKEEASDYLELDTIK	22	1	2451.3	P08113	P08113	244	265	Hsp90b1	Endoplasmin	yes	yes	3	1.0294e-90	145.9	197460000	154150000	43306000	154150000	222510000
SSGPTSLFAVTVAPPGAR	18	0	1713.9	Q8VEK3	Q8VEK3	182	199	Hnrnpu	Heterogeneous nuclear ribonucleoprotein U	yes	yes	2	7.9708e-76	145.29	76654000	76654000	0	76654000	0
TLTAVHDAILEDLVFPSEIVGK	22	0	2366.27	P62082	P62082	121	142	Rps7	40S ribosomal protein S7	yes	yes	3	0	144.82	168050000	168050000	0	168050000	0
GTVLLSGPR	9	0	898.524	A0A1B0GSF7;A0A1B0GQU8;P35980;A0A1B0GSS8	A0A1B0GSF7	83	91	Rpl18	60S ribosomal protein L18	yes	no	2	3.0034e-27	143.61	8366600	8366600	0	8366600	0
LSELLR	6	0	729.438	P11499;E9Q0C3;A0A668KLD0;Q6DFZ1;P07901	P11499	451	456	Hsp90ab1;Gbf1;Hsp90aa1	Heat shock protein HSP 90-beta;Heat shock protein HSP 90-alpha	no	no	2	2.2924e-12	142.53	153350000	153350000	0	153350000	0
EKLGTLESVYIVDPK	15	1	1689.92	Q9QZ82	Q9QZ82	88	102	Cyp11a1	Cholesterol side-chain cleavage enzyme, mitochondrial	yes	yes	2	7.9751e-16	141.13	109520000	109520000	0	109520000	0
TFHIFYYLLAGAK	13	0	1542.82	A0A2R8VHF9;E9QPE7;A0A338P6K2;O08638	A0A2R8VHF9	280	292	Myh11	Myosin-11	yes	no	2	3.9151e-41	140.16	18063000	18063000	0	18063000	0
AFGYYGPLR	9	0	1042.52	P84104	P84104	29	37	Srsf3	Serine/arginine-rich splicing factor 3	yes	yes	2	2.8328e-19	139.92	44116000	44116000	0	44116000	0
HASSILPITEFSDITR	16	0	1785.93	Q61029	Q61029	303	318	Tmpo	Lamina-associated polypeptide 2, isoforms beta/delta/epsilon/gamma	yes	yes	2;3	4.0618e-52	139.58	74714000	74714000	0	74714000	0
VAFITGGGTGLGK	13	0	1176.65	Q9CQ62	Q9CQ62	61	73	Decr1	2,4-dienoyl-CoA reductase, mitochondrial	yes	yes	2	1.3453e-33	136.48	12001000	12001000	0	12001000	0
NPDDITQEEYGEFYK	15	0	1846.79	P11499;E9Q3D6	P11499	292	306	Hsp90ab1	Heat shock protein HSP 90-beta	yes	no	2	8.1398e-29	136.27	40969000	40969000	0	40969000	0
VILHLKEDQTEYLEER	16	1	2014.04	P11499;P07901;B7ZC50	P11499	181	196	Hsp90ab1;Hsp90aa1	Heat shock protein HSP 90-beta;Heat shock protein HSP 90-alpha	no	no	2;3;4	2.7853e-20	135.6	122300000	122300000	0	122300000	0
KHLEINPDHSIIETLR	16	1	1914.03	P07901	P07901	633	648	Hsp90aa1	Heat shock protein HSP 90-alpha	yes	yes	4	2.1323e-44	135.47	17106000	17106000	0	17106000	0
AFSYYGPLR	9	0	1072.53	A0A3Q4EH04;A0A3Q4L335;A0A3Q4L393;Q8BL97	A0A3Q4EH04	30	38	Srsf7	Serine/arginine-rich splicing factor 7	yes	no	2	6.9696e-10	134.06	16575000	16575000	0	16575000	0
KHLEINPDHPIVETLR	16	1	1910.04	P11499	P11499	624	639	Hsp90ab1	Heat shock protein HSP 90-beta	yes	yes	3;4	3.7039e-37	133.86	92578000	92578000	0	92578000	0
STFVLDEFKR	10	1	1240.65	Q9D8N0	Q9D8N0	286	295	Eef1g	Elongation factor 1-gamma	yes	yes	2;3	8.5036e-13	133.23	223570000	223570000	0	223570000	0
SPPLLGSESPYEDFLSADSK	20	0	2138.01	P14873	P14873	1395	1414	Map1b	Microtubule-associated protein 1B;MAP1B heavy chain;MAP1 light chain LC1	yes	yes	2	6.7599e-58	132.44	6276300	6276300	0	6276300	0
SLLEKELESVGIR	13	1	1471.82	Q9QXB9	Q9QXB9	157	169	Drg2	Developmentally-regulated GTP-binding protein 2	yes	yes	2;3	4.062e-26	131.82	23018000	23018000	0	23018000	0
DLLHPSPEEEKRK	13	2	1576.82	A0A0G2JDW7;A0A0G2JG29;Q6ZWU9	A0A0G2JDW7	4	16	Rps27	40S ribosomal protein S27	yes	no	3	4.9172e-26	131.69	8680500	8680500	0	8680500	0
EALEALVPVTIEVEVPFDLHR	21	0	2375.27	Q8VDJ3;A0A087WP83	Q8VDJ3	965	985	Hdlbp	Vigilin	yes	no	3	2.3315e-213	131.54	65579000	65579000	0	65579000	0
IGGIGTVPVGR	11	0	1024.6	P10126;P62631	P10126	256	266	Eef1a1;Eef1a2	Elongation factor 1-alpha 1;Elongation factor 1-alpha 2	no	no	2	4.7174e-19	131.41	284240000	268560000	15675000	268560000	80541000
KKPEYLEGLPEK	12	2	1429.78	P15626;D3YX76	P15626	123	134	Gstm2	Glutathione S-transferase Mu 2	yes	no	2;3	4.8823e-19	131.17	293080000	293080000	0	293080000	0
EIIDLVLDR	9	0	1084.61	P68373;P68369;P05213;A0A2R8VHF3	P68373	113	121	Tuba1c;Tuba1a;Tuba1b	Tubulin alpha-1C chain;Tubulin alpha-1A chain;Tubulin alpha-1B chain	yes	no	2	3.3862e-08	131.06	10952000	10952000	0	10952000	0
DTTASAVAVGLR	12	0	1159.62	Q8BMS1	Q8BMS1	520	531	Hadha	Trifunctional enzyme subunit alpha, mitochondrial;Long-chain enoyl-CoA hydratase;Long chain 3-hydroxyacyl-CoA dehydrogenase	yes	yes	2	7.1452e-30	130.75	18166000	18166000	0	18166000	0
ISVYYNEATGGK	12	0	1300.63	P99024	P99024	47	58	Tubb5	Tubulin beta-5 chain	yes	yes	2	2.1152e-19	130.41	34677000	34677000	0	34677000	0
MELVEVLKR	9	1	1115.64	F6RBR6;A0A0R4J275;Q7TMF3	F6RBR6	1	9	Ndufa12	NADH dehydrogenase [ubiquinone] 1 alpha subcomplex subunit 12	yes	no	2	7.5117e-09	130.22	5237600	5237600	0	5237600	0
SSVSGVVATVFGATGFLGR	19	0	1810.96	A0A0R3P9C8;Q9DC69	A0A0R3P9C8	45	63	Ndufa9	NADH dehydrogenase [ubiquinone] 1 alpha subcomplex subunit 9, mitochondrial	yes	no	2;3	1.0563e-45	130.2	40359000	40359000	0	40359000	0
YEEIVKEVSTYIK	13	1	1599.84	P10126;D3YZ68;D3Z3I8	P10126	167	179	Eef1a1	Elongation factor 1-alpha 1	yes	no	2;3	7.4693e-26	129.89	78982000	78982000	0	78982000	0
SETAPAAPAAPAPAEKTPVK	20	1	1903.01	P43274	P43274	2	21	Hist1h1e	Histone H1.4	yes	yes	2	0.00017145	128.96	23234000	23234000	0	23234000	0
VYVGNLGTGAGKGELER	17	1	1718.9	A0A3Q4EH04;A0A3Q4L335;A0A3Q4L393;Q8BL97	A0A3Q4EH04	13	29	Srsf7	Serine/arginine-rich splicing factor 7	yes	no	2;3	1.0697e-10	128.76	57124000	57124000	0	57124000	0
STELLIR	7	0	830.486	A0A8I4SYN6;A0A1W2P768;P84228;P68433;E0CZ27;F8WI35;P84244;P02301	A0A8I4SYN6	58	64	Hist1h3b;Hist1h3a;H3f3a;H3f3c	Histone H3.2;Histone H3.1;Histone H3;Histone H3.3;Histone H3.3C	yes	no	2	0.0027302	128.75	104220000	104220000	0	104220000	0
HIYFITGETK	10	0	1207.62	P07901	P07901	491	500	Hsp90aa1	Heat shock protein HSP 90-alpha	yes	yes	2	4.1892e-09	128.36	192040000	192040000	0	192040000	0
HFSVEGQLEFR	11	0	1347.66	P11499;E9Q3D6;P07901	P11499	320	330	Hsp90ab1;Hsp90aa1	Heat shock protein HSP 90-beta;Heat shock protein HSP 90-alpha	no	no	2;3	6.9821e-14	128.36	75210000	75210000	0	75210000	0
YFDSFGDLSSASAIMGNAK	19	0	1979.89	A8DUK4;E9Q223;P02088	A8DUK4	42	60	Hbbt1;Hbb-bs;Hbb-b1	Hemoglobin subunit beta-1	yes	no	2	3.1958e-39	128.31	41936000	41936000	0	41936000	0
HAEKIEEVKK	10	2	1209.67	Q99MR6;A0A0G2JG65;A0A0G2JDF8	Q99MR6	735	744	Srrt	Serrate RNA effector molecule homolog	yes	no	2	3.9184e-194	128.27	0	0	0	0	0
DYFEEYGKIDTIEIITDR	18	1	2219.06	O88569;A0A0N4SUM2	O88569	130	147	Hnrnpa2b1	Heterogeneous nuclear ribonucleoproteins A2/B1	yes	no	3	2.997e-33	128.26	31627000	31627000	0	31627000	0
KPPPDGPYVEVVR	13	1	1451.78	P24472	P24472	205	217	Gsta4	Glutathione S-transferase A4	yes	yes	2;3	1.0873e-10	128.01	33540000	33540000	0	33540000	0
AEYLASIFGTEKDK	14	1	1570.79	E9PWX6;A0A494BA95;E9PWM2;A0A494B9X9;E9Q809;F8WH71;E9Q5Y2;E9PUZ3;E9Q1I7;E9Q5J3;G3UW94;Q8BGJ9;Q9D883	E9PWX6	2	15	U2af1l4;U2af1	Splicing factor U2AF 26 kDa subunit;Splicing factor U2AF 35 kDa subunit	yes	no	2	1.5872e-21	127.87	43199000	43199000	0	43199000	0
VTYVDFLVYDVLDQHR	16	0	1980.99	P15626;D3YX76	P15626	153	168	Gstm2	Glutathione S-transferase Mu 2	yes	no	2;3	1.1279e-28	127.3	94906000	94906000	0	94906000	0
YHTSQSGDEMTSLSEYVSR	19	0	2175.94	P11499;E9Q0C3	P11499	457	475	Hsp90ab1	Heat shock protein HSP 90-beta	yes	no	2;3	0.0019509	127.02	64838000	64838000	0	64838000	0
SLADLTAVDVPTR	13	0	1356.72	Q9DCT2	Q9DCT2	109	121	Ndufs3	NADH dehydrogenase [ubiquinone] iron-sulfur protein 3, mitochondrial	yes	yes	2	1.1326e-07	125.74	11951000	11951000	0	11951000	0
KHPDASVNFSEFSK	14	1	1591.76	A0A0J9YUZ4;P63158;A0A0J9YUD8;D3YZ18;D3YVC6	A0A0J9YUZ4	44	57	Hmgb1	High mobility group protein B1	yes	no	2;3;4	6.3367e-20	125.54	146740000	146740000	0	146740000	0
GLAVFISDIR	10	0	1089.62	P17427;A0A140LHG0;P17426	P17427	12	21	Ap2a2;Ap2a1	AP-2 complex subunit alpha-2;AP-2 complex subunit alpha-1	yes	no	2	5.136e-07	124.98	13356000	13356000	0	13356000	0
FTVAELK	7	0	806.454	Q3UJB0	Q3UJB0	443	449	Sf3b2		yes	yes	1	0.014005	124.34	8340400	8340400	0	8340400	0
ELIEIISGAAALD	13	0	1313.71	Q8C2Q8;Q91VR2	Q8C2Q8	262	274	Atp5c1	ATP synthase subunit gamma;ATP synthase subunit gamma, mitochondrial	yes	no	2	1.0633e-16	124.23	22380000	22380000	0	22380000	0
GYAFIEFASFEDAK	14	0	1593.74	P09405	P09405	525	538	Ncl	Nucleolin	yes	yes	2	4.3986e-17	124.1	49203000	49203000	0	49203000	0
KIEEIKDFLLTAR	13	2	1574.9	Q9JJI8	Q9JJI8	4	16	Rpl38	60S ribosomal protein L38	yes	yes	2	3.8325e-16	123.95	95994000	95994000	0	95994000	0
HFEATDILVSK	11	0	1258.66	Q05D44	Q05D44	1171	1181	Eif5b	Eukaryotic translation initiation factor 5B	yes	yes	2	1.6384e-06	123.35	13304000	13304000	0	13304000	0
MFASFPTTK	9	0	1028.5	Q91VB8;P01942	Q91VB8	33	41	haemaglobin alpha 2;Hba	Hemoglobin subunit alpha	yes	no	1;2	0.00084088	122.19	63445000	63445000	0	63445000	0
KGVVKAEK	8	2	857.533	A0A0J9YUZ4;P63158	A0A0J9YUZ4	187	194	Hmgb1	High mobility group protein B1	yes	no	2	0.0098618	122.19	22222000	22222000	0	22222000	0
VYGTGSLALYEK	12	0	1299.67	Q8C2Q8;Q91VR2;A2AKV0;A2AKV1;A2AKV2;A2AKV3;A2AKU9	Q8C2Q8	44	55	Atp5c1	ATP synthase subunit gamma;ATP synthase subunit gamma, mitochondrial	yes	no	2	1.398e-10	121.6	75307000	75307000	0	75307000	0
KFEAEILEAISSNSVVIIR	19	1	2117.17	A0A087WPL5;E9QNN1;Q3UR42;O70133;A0A0R4J2C3	A0A087WPL5	394	412	Dhx9	ATP-dependent RNA helicase A	yes	no	3	5.5517e-34	121.26	21331000	21331000	0	21331000	0
DISEASVFDAYVLPK	15	0	1652.83	P62855	P62855	52	66	Rps26	40S ribosomal protein S26	yes	yes	2	8.6967e-24	121.08	125400000	125400000	0	125400000	0
VAIVEELVVGYETSLK	16	0	1747.96	A0A0A6YW80;G3X8Y3;Q80UM3	A0A0A6YW80	289	304	Naa15	N-alpha-acetyltransferase 15, NatA auxiliary subunit	yes	no	2	0.0038666	121.04	15839000	15839000	0	15839000	0
ELLLTGPGLEER	12	0	1325.72	E9PV22;Q505F5	E9PV22	47	58	Lrrc47	Leucine-rich repeat-containing protein 47	yes	no	2	3.3874e-06	120.68	10879000	10879000	0	10879000	0
LITPAVVSER	10	0	1083.63	A0A1L1SQA8;P62852	A0A1L1SQA8	35	44	Rps25	40S ribosomal protein S25	yes	no	2	2.4938e-05	120.12	20197000	20197000	0	20197000	0
FFHLAFEEEFGR	12	0	1527.71	Q9QZD9	Q9QZD9	269	280	Eif3i	Eukaryotic translation initiation factor 3 subunit I	yes	yes	3	6.2547e-42	120.06	5892700	5892700	0	5892700	0
KHHEDEIDHHSKEIER	16	2	2037.96	E9PV44;O35143	E9PV44	40	55	Atpif1	ATPase inhibitor, mitochondrial	yes	no	2;3;4;5;6	2.2463e-20	119.56	54131000	54131000	0	54131000	0
SPASDTYIVFGEAK	14	0	1483.72	Q60817;P70670	Q60817	114	127	Naca	Nascent polypeptide-associated complex subunit alpha;Nascent polypeptide-associated complex subunit alpha, muscle-specific form	yes	no	2	8.2104e-14	119.39	24937000	24937000	0	24937000	0
TVPEELVKPEELSK	14	1	1596.86	Q99KP6	Q99KP6	193	206	Prpf19	Pre-mRNA-processing factor 19	yes	yes	2;3	2.5067e-06	118.9	27130000	27130000	0	27130000	0
ALSAIAELLTSEHER	15	0	1638.86	E9Q8Z4;E9Q8Z9;D3Z2H2;E9Q903;E9Q901;E9Q904;G3X9V2;E9Q8Z5;E9Q8Z6;E9Q8Z8;P30999;D3Z2H7;E9Q986;D3Z7H6;E9Q906;E9Q907;E9Q905	E9Q8Z4	641	655	Ctnnd1	Catenin delta-1	yes	no	3	2.2995e-19	118.51	7427600	7427600	0	7427600	0
LFIGGLSFETTDDSLREHFEK	21	1	2440.19	A2AL12;Q8BG05	A2AL12	37	57	Hnrnpa3	Heterogeneous nuclear ribonucleoprotein A3	yes	no	3	2.3118e-28	118.46	17429000	17429000	0	17429000	0
TTPDVIFVFGFR	12	0	1397.73	A0A286YEB7;P62849	A0A286YEB7	38	49	Rps24	40S ribosomal protein S24	yes	no	2	2.3404e-08	117.89	256380000	256380000	0	256380000	0
SILYVSPHPDAFPSLR	16	0	1797.94	G3UY93;Q9Z1Q9;G3UZ22	G3UY93	2	17	Vars	Valine--tRNA ligase	yes	no	2	3.2541e-20	117.79	28035000	28035000	0	28035000	0
AILVDLEPGTMDSVR	15	0	1614.83	P99024;Q9CWF2;Q7TMM9;Q9ERD7;A0A1D5RM76	P99024	63	77	Tubb5;Tubb2b;Tubb2a;Tubb3	Tubulin beta-5 chain;Tubulin beta-2B chain;Tubulin beta-2A chain;Tubulin beta-3 chain	yes	no	2	3.5663e-17	116.55	55136000	55136000	0	55136000	0
LFYHIVDSDEVSTK	14	0	1651.81	Q9CW03	Q9CW03	558	571	Smc3	Structural maintenance of chromosomes protein 3	yes	yes	2;3	5.9805e-12	116.55	13798000	13798000	0	13798000	0
DFSATDLTEFAAR	13	0	1442.67	Q8BWT1	Q8BWT1	26	38	Acaa2	3-ketoacyl-CoA thiolase, mitochondrial	yes	yes	2	5.2821e-11	116.23	24096000	24096000	0	24096000	0
GSLIITFDVDFPKEQLTEEAKEGIK	25	2	2806.46	Q99KV1;A0A338P778	Q99KV1	316	340	Dnajb11	DnaJ homolog subfamily B member 11	yes	no	3;4	8.9518e-25	115.55	15959000	15959000	0	15959000	0
TIAECLADELINAAK	15	0	1630.82	D3YYM6;D3Z1S8;Q91V55	D3YYM6	168	182	Rps5		yes	no	2	5.0168e-16	114.82	8468400	8468400	0	8468400	0
NPDDITNEEYGEFYK	15	0	1832.77	P07901	P07901	301	315	Hsp90aa1	Heat shock protein HSP 90-alpha	yes	yes	2	0.0039266	114.76	32334000	32334000	0	32334000	0
LAAAFAVSR	9	0	904.513	D3YXU1;Q99JY0	D3YXU1	139	147	Hadhb	Trifunctional enzyme subunit beta, mitochondrial;3-ketoacyl-CoA thiolase	yes	no	2	0.0074845	114.5	23610000	23610000	0	23610000	0
KHPDADSLYVEEVDVGEAAPR	21	1	2296.1	Q3UZG4;P31230	Q3UZG4	174	194	Aimp1	Aminoacyl tRNA synthase complex-interacting multifunctional protein 1;Endothelial monocyte-activating polypeptide 2	yes	no	2;3;4	9.4647e-79	113.99	44177000	44177000	0	44177000	0
IGGHGAEYGAEALER	15	0	1528.73	Q91VB8;P01942	Q91VB8	18	32	haemaglobin alpha 2;Hba	Hemoglobin subunit alpha	yes	no	2	0.0030881	113.77	255430000	255430000	0	255430000	0
IFVGGLSPDTPEEK	14	0	1487.75	F6ZV59;G5E8G0;G3X9W0;Q60668;E9Q5B6;F6SHF3	F6ZV59	94	107	Hnrnpd	Heterogeneous nuclear ribonucleoprotein D0	yes	no	2	1.3388e-10	113.63	75925000	75925000	0	75925000	0
KTEPATGFIDGDLIESFLDISRPK	24	2	2648.37	A0A494B987;Q3U1J4	A0A494B987	392	415	Ddb1	DNA damage-binding protein 1	yes	no	3;4	3.6721e-24	113.54	93505000	93505000	0	93505000	0
EKEESYDLILSR	12	1	1480.74	P24472	P24472	116	127	Gsta4	Glutathione S-transferase A4	yes	yes	3	4.5706e-20	113.24	11483000	11483000	0	11483000	0
SDAAVDTSSEITTK	14	0	1423.67	A0A087WP98;A0A087WPN6;A0A087WQN2;P26350	A0A087WP98	2	15	Ptma	Prothymosin alpha;Prothymosin alpha, N-terminally processed;Thymosin alpha	yes	no	2	6.9007e-11	113.22	50287000	50287000	0	50287000	0
KEAPAPPKAEAK	12	2	1235.69	P62751	P62751	7	18	Rpl23a	60S ribosomal protein L23a	yes	yes	2;3	8.7595e-06	113.22	12908000	12908000	0	12908000	0
LIPDSIGKDIEK	12	1	1326.74	P97351	P97351	188	199	Rps3a	40S ribosomal protein S3a	yes	yes	2	1.1659e-05	112.71	118590000	118590000	0	118590000	0
YGRPPDSHHSR	11	1	1307.61	Q62093	Q62093	92	102	Srsf2	Serine/arginine-rich splicing factor 2	yes	yes	2;3	4.307e-07	112.36	41498000	41498000	0	41498000	0
LSNIFVIGK	9	0	989.591	P62702	P62702	222	230	Rps4x	40S ribosomal protein S4, X isoform	yes	yes	2	0.011112	111.95	6797500	6797500	0	6797500	0
DFPLTGYVELR	11	0	1308.67	Q9DCT2	Q9DCT2	200	210	Ndufs3	NADH dehydrogenase [ubiquinone] iron-sulfur protein 3, mitochondrial	yes	yes	2	1.4741e-05	111.61	12411000	12411000	0	12411000	0
DGSASGTTLLEALDCILPPTRPTDKPLR	28	2	2993.55	P10126;D3YZ68	P10126	220	247	Eef1a1	Elongation factor 1-alpha 1	yes	no	3;4	1.0698e-21	111.4	77619000	77619000	0	77619000	0
IDGAVISESTPIAETIK	17	0	1742.93	Q61029	Q61029	269	285	Tmpo	Lamina-associated polypeptide 2, isoforms beta/delta/epsilon/gamma	yes	yes	2	5.8154e-11	111.31	134150000	134150000	0	134150000	0
IEEGTYGVVYR	11	0	1284.63	A2A9P6;P24788	A2A9P6	399	409	Cdk11b	Cyclin-dependent kinase 11B	yes	no	2	1.8002e-05	110.87	11806000	11806000	0	11806000	0
HGSLGFLPR	9	0	982.535	A0A087WNS0;A0A087WQK0;P27659	A0A087WNS0	11	19	Rpl3	60S ribosomal protein L3	yes	no	2	0.010278	110.81	15161000	15161000	0	15161000	0
SSVAVLTQESFAEHR	15	0	1659.82	Q8VDJ3;A0A087WP83;A0A087WQY9;A0A087WPC5;A0A087WS92;A0A087WPH2	Q8VDJ3	2	16	Hdlbp	Vigilin	yes	no	2	2.757e-47	110.66	0	0	0	0	0
TLLKDTTVTGLGR	13	1	1373.79	Q8BMS1	Q8BMS1	387	399	Hadha	Trifunctional enzyme subunit alpha, mitochondrial;Long-chain enoyl-CoA hydratase;Long chain 3-hydroxyacyl-CoA dehydrogenase	yes	yes	3	4.6132e-09	110.38	30912000	30912000	0	30912000	0
SGVSITIDDPVR	12	0	1257.66	F6RJ39;Q9JIX8;Q52KR6;B8JJ92;B8JJ91	F6RJ39	920	931	Acin1	Apoptotic chromatin condensation inducer in the nucleus	yes	no	2	6.9754e-06	110.14	28923000	28923000	0	28923000	0
SFVEFILEPLYK	12	0	1483.8	G3UZ34;A2AH85;O08810	G3UZ34	358	369	Eftud2	116 kDa U5 small nuclear ribonucleoprotein component	yes	no	2	8.0181e-06	109.42	13244000	13244000	0	13244000	0
YGAIRDIDLK	10	1	1162.63	H7BX95;Q6PDM2	H7BX95	39	48	Srsf1	Serine/arginine-rich splicing factor 1	yes	no	2	0.010225	109.29	30852000	30852000	0	30852000	0
GNSIIMLEALERV	13	1	1443.78	P62309	P62309	64	76	Snrpg	Small nuclear ribonucleoprotein G	yes	yes	2	0.00073394	109.24	23322000	23322000	0	23322000	0
LIEALSHEAIVLAACGR	17	0	1821.98	Q8BK67	Q8BK67	193	209	Rcc2	Protein RCC2	yes	yes	3	5.6895e-25	109.07	16819000	16819000	0	16819000	0
GGPPFAFVEFEDPRDAEDAVYGR	23	1	2540.16	H7BX95;Q6PDM2	H7BX95	52	74	Srsf1	Serine/arginine-rich splicing factor 1	yes	no	3	7.2654e-13	109.05	96687000	96687000	0	96687000	0
SPFIFNAIIR	10	0	1176.67	P24815	P24815	195	204	Hsd3b1	3 beta-hydroxysteroid dehydrogenase/Delta 5-->4-isomerase type 1;3-beta-hydroxy-Delta(5)-steroid dehydrogenase;Steroid Delta-isomerase	yes	yes	2	0.0031222	109.01	28755000	28755000	0	28755000	0
LANELAR	7	0	785.44	V9GXM7;V9GXE0;Q61884	V9GXM7	93	99	Mns1	Meiosis-specific nuclear structural protein 1	yes	no	2	0.014319	108.98	237440000	0	237440000	0	1220000000
KGHAVGDIPGVR	12	1	1204.67	P62267	P62267	108	119	Rps23	40S ribosomal protein S23	yes	yes	2;3	4.8795e-05	108.7	30234000	30234000	0	30234000	0
HLTDAYFK	8	0	993.492	P47911	P47911	219	226	Rpl6	60S ribosomal protein L6	yes	yes	2	0.018262	108.7	11076000	11076000	0	11076000	0
ILTFDQLALESPK	13	0	1473.81	A0A1B0GSF7;A0A1B0GQU8;P35980;A0A1B0GSS8	A0A1B0GSF7	68	80	Rpl18	60S ribosomal protein L18	yes	no	2	1.1155e-08	107.83	5732800	5732800	0	5732800	0
TTDGYLLR	8	0	937.487	P97351	P97351	129	136	Rps3a	40S ribosomal protein S3a	yes	yes	2	0.010962	107.43	17235000	17235000	0	17235000	0
YLYTLVITDKEK	12	1	1484.81	Q9JJI8	Q9JJI8	41	52	Rpl38	60S ribosomal protein L38	yes	yes	2;3	2.8929e-05	107.24	52266000	52266000	0	52266000	0
TEIIILATR	9	0	1028.62	A0A140LI77;D3YV43;P62908	A0A140LI77	46	54	Rps3	40S ribosomal protein S3	yes	no	2	1.6239e-87	106.6	0	0	0	0	0
ILGADTSVDLEETGR	15	0	1574.78	Q03265;D3Z6F5;D6RJ16	Q03265	59	73	Atp5a1	ATP synthase subunit alpha, mitochondrial;ATP synthase subunit alpha	yes	no	2	5.9385e-07	106.49	66092000	66092000	0	66092000	0
YESLTDPSKLDSGK	14	1	1538.75	P11499;E9PX27;D3Z1R1;P07901;B7ZC50;A2A6A2;B7ZC49	P11499	56	69	Hsp90ab1;Hsp90aa1	Heat shock protein HSP 90-beta;Heat shock protein HSP 90-alpha	no	no	2	8.9358e-07	106.49	11161000	11161000	0	11161000	0
ASSFVLALEPELESR	15	0	1646.85	Q91YQ5;A0A0N4SUJ8	Q91YQ5	67	81	Rpn1	Dolichyl-diphosphooligosaccharide--protein glycosyltransferase subunit 1	yes	no	2	7.9029e-07	106.01	85903000	85903000	0	85903000	0
FVIKPIDKK	9	2	1086.68	A0A5F8MPB9;P26041;P26043;Q7TSG6;P26040	A0A5F8MPB9	255	263	Msn;Rdx;Ezr	Moesin;Radixin;Ezrin	yes	no	2	8.592e-31	105.57	12032000	12032000	0	12032000	0
TEGISTSDIITR	12	0	1291.66	P49586;Q811Q9	P49586	197	208	Pcyt1a;Pcyt1b	Choline-phosphate cytidylyltransferase A;Choline-phosphate cytidylyltransferase B	yes	no	2	4.8228e-06	105.52	58400000	58400000	0	58400000	0
KPIDYTVLDDVGHGVK	16	1	1754.92	B7ZCU2;B7ZCU5;B7ZCU4;B7ZCU3;B7ZCU0;J3QNK8;Q8CBW3	B7ZCU2	139	154	Abi1	Abl interactor 1	yes	no	3;4	6.49e-25	105.28	20028000	20028000	0	20028000	0
LFIGGLSFETTEESLR	16	0	1797.91	O88569	O88569	23	38	Hnrnpa2b1	Heterogeneous nuclear ribonucleoproteins A2/B1	yes	yes	2	0.00077243	105.17	18913000	18913000	0	18913000	0
IAIYELLFK	9	0	1108.65	P63325;A0A338P731;Q3UW83;A0A338P7K4;A0A3B2W864	P63325	9	17	Rps10	40S ribosomal protein S10	yes	no	2	8.1666e-23	105.14	26048000	26048000	0	26048000	0
IYDALDITLIER	12	0	1433.78	Q9D0I9	Q9D0I9	322	333	Rars	Arginine--tRNA ligase, cytoplasmic	yes	yes	2	3.2315e-06	104.79	17694000	17694000	0	17694000	0
VLLATLSIPITPER	14	0	1521.91	P23116	P23116	322	335	Eif3a	Eukaryotic translation initiation factor 3 subunit A	yes	yes	2	0.0030373	104.79	16173000	16173000	0	16173000	0
RPPSAFFLFCSEYRPK	16	2	2000.99	A0A0J9YUZ4;P63158;A0A0J9YUD8;D3YZ18	A0A0J9YUZ4	111	126	Hmgb1	High mobility group protein B1	yes	no	3;4	1.0273e-05	104.66	123370000	123370000	0	123370000	0
HLVGVCYTEEEAK	13	0	1533.71	Q9D0M3;A0A2R8VHK1	Q9D0M3	134	146	Cyc1	Cytochrome c1, heme protein, mitochondrial	yes	no	2	2.336e-07	104.22	6271900	6271900	0	6271900	0
SAPATGGVKKPHR	13	2	1304.73	A0A8I4SYN6;A0A1W2P768;P84228;P68433	A0A8I4SYN6	29	41	Hist1h3b;Hist1h3a	Histone H3.2;Histone H3.1	yes	no	2;3	9.8396e-07	103.88	9792400	9792400	0	9792400	0
AAAAGAVVASAASGPAEGKK	20	1	1682.9	A0A1L1SRL0;A0A1L1STF9;Q8CH25	A0A1L1SRL0	2	21	Sltm	SAFB-like transcription modulator	yes	no	2	8.819e-08	103.75	5683900	5683900	0	5683900	0
TTGFGMIYDSLDYAK	15	0	1680.77	A0A286YEB7;P62849	A0A286YEB7	57	71	Rps24	40S ribosomal protein S24	yes	no	2	2.6024e-05	103.44	66738000	66738000	0	66738000	0
ATIAGGGVIPHIHK	14	0	1369.78	Q8R029;Q3UA95;Q3THW5;P0C0S6	Q8R029	65	78	H2afv;H2afz	Histone H2A;Histone H2A.V;Histone H2A.Z	yes	no	2	0.0027226	103.42	39679000	39679000	0	39679000	0
GLLSSLDHTSIR	12	0	1297.7	Q9D0M3;A0A2R8VHK1	Q9D0M3	100	111	Cyc1	Cytochrome c1, heme protein, mitochondrial	yes	no	2	5.2831e-05	103.26	15514000	15514000	0	15514000	0
LHPVILASIVDSYER	15	0	1710.93	Q9DCH4	Q9DCH4	98	112	Eif3f	Eukaryotic translation initiation factor 3 subunit F	yes	yes	3	0.00028446	102.73	9842700	9842700	0	9842700	0
SSLNPILFR	9	0	1045.59	O54734	O54734	175	183	Ddost	Dolichyl-diphosphooligosaccharide--protein glycosyltransferase 48 kDa subunit	yes	yes	2	0.001389	102.72	1807500	1807500	0	1807500	0
TLTLVDTGIGMTK	13	0	1348.73	P11499	P11499	83	95	Hsp90ab1	Heat shock protein HSP 90-beta	yes	yes	2	2.2059e-05	101.93	399480000	399480000	0	399480000	0
IIPGAAEKIER	11	1	1195.69	D3Z1S1;F6WYM0;D3YYB1;D3Z3C0;P42208;D3YV76;F6UKN5;D3YZU7;E9Q3V6	D3Z1S1	97	107	Sept2	Septin-2	yes	no	3	0.00015815	101.93	5481800	5481800	0	5481800	0
TVDLSSHLAK	10	0	1069.58	Q91YQ5;A0A0N4SUJ8	Q91YQ5	40	49	Rpn1	Dolichyl-diphosphooligosaccharide--protein glycosyltransferase subunit 1	yes	no	2	1.0788e-05	101.9	9664000	9664000	0	9664000	0
IHFPLATYAPVISAEK	16	0	1755.96	P68373;P68369;P05213;P05214;A0A0A0MQA5;P68368	P68373	265	280	Tuba1c;Tuba1a;Tuba1b;Tuba3a;Tuba4a	Tubulin alpha-1C chain;Tubulin alpha-1A chain;Tubulin alpha-1B chain;Tubulin alpha-3 chain;Tubulin alpha-4A chain	yes	no	2;3	3.0267e-05	101.39	46173000	46173000	0	46173000	0
AIAELGIYPAVDPLDSTSR	19	0	1987.03	P56480	P56480	388	406	Atp5b	ATP synthase subunit beta, mitochondrial	yes	yes	2;3	1.3776e-06	101.39	34257000	34257000	0	34257000	0
FGEVVDCTLKLDPITGR	17	1	1918.98	F6ZV59;G5E8G0;G3X9W0;Q60668;E9Q5B6	F6ZV59	30	46	Hnrnpd	Heterogeneous nuclear ribonucleoprotein D0	yes	no	2;3	8.3411e-06	101.39	26563000	26563000	0	26563000	0
LSIVPVRR	8	1	938.603	D3YVC1;D3YWJ3;P25444	D3YVC1	160	167	Rps2	40S ribosomal protein S2	yes	no	2;3	6.0888e-70	101.21	6351200	6351200	0	6351200	0
MKLYSEFLGK	10	1	1214.64	A2AE89;P10649;F6WHQ7;P15626;D3YX76	A2AE89	161	170	Gstm1;Gstm2	Glutathione S-transferase Mu 1;Glutathione S-transferase Mu 2	no	no	2	0.0039488	101.11	41814000	41814000	0	41814000	0
EYTINIHKR	9	1	1172.63	A0A0A6YXL3;A0A0A6YX26;P62900	A0A0A6YXL3	24	32	Rpl31	60S ribosomal protein L31	yes	no	2	0.0039579	100.45	2481000	2481000	0	2481000	0
LHFFMPGFAPLTSR	14	0	1619.83	P99024;Q9CWF2;Q7TMM9;Q9D6F9;P68372	P99024	263	276	Tubb5;Tubb2b;Tubb2a;Tubb4a;Tubb4b	Tubulin beta-5 chain;Tubulin beta-2B chain;Tubulin beta-2A chain;Tubulin beta-4A chain;Tubulin beta-4B chain	no	no	2;3	9.8654e-14	100.22	70118000	70118000	0	70118000	0
AAAGSAAVSGAGTPVAGPTGR	21	0	1724.88	V9GXI0;V9GXT7;Q9Z266	V9GXI0	2	22	Snapin	SNARE-associated protein Snapin	yes	no	2	3.1289e-11	100.19	2710100	2710100	0	2710100	0
DFTPSGIAGAFR	12	0	1237.61	P56135;F8WHP8	P56135	28	39	Atp5j2	ATP synthase subunit f, mitochondrial	yes	no	2	4.4988e-07	99.653	85437000	85437000	0	85437000	0
DLYEDELVPLFEK	13	0	1608.79	A2AW41;F7B5B5;Q8VHM5	A2AW41	175	187	Hnrnpr		yes	no	2	5.3491e-05	99.522	32372000	32372000	0	32372000	0
AFIPAIDSFGFETDLR	16	0	1797.89	G3UZ34;A2AH85;O08810	G3UZ34	863	878	Eftud2	116 kDa U5 small nuclear ribonucleoprotein component	yes	no	2	2.227e-15	99.5	26844000	26844000	0	26844000	0
AERGELDLTGAK	12	1	1258.65	Q8R0A0	Q8R0A0	2	13	Gtf2f2	General transcription factor IIF subunit 2	yes	yes	2	1.2997e-07	99.215	18425000	18425000	0	18425000	0
KESYSVYVYK	10	1	1264.63	Q8CBB6;Q8CGP2;Q8CGP1;Q6ZWY9;Q64525;Q64478;Q64475;P10854;P10853	Q8CBB6	35	44	Hist1h2br;Hist1h2bp;Hist1h2bk;Hist1h2bc;Hist2h2bb;Hist1h2bh;Hist1h2bb;Hist1h2bm;Hist1h2bf	Histone H2B;Histone H2B type 1-P;Histone H2B type 1-K;Histone H2B type 1-C/E/G;Histone H2B type 2-B;Histone H2B type 1-H;Histone H2B type 1-B;Histone H2B type 1-M;Histone H2B type 1-F/J/L	yes	no	2	0.00013068	99.013	43039000	43039000	0	43039000	0
VKVEPSHDASK	11	1	1195.62	B7FAV1;B7FAU9;Q8BTM8	B7FAV1	840	850	Flna	Filamin-A	yes	no	2	4.2004e-07	98.943	7528700	7528700	0	7528700	0
DVDLEFLAK	9	0	1048.54	Q01853	Q01853	669	677	Vcp	Transitional endoplasmic reticulum ATPase	yes	yes	2	0.0003558	98.523	8817500	8817500	0	8817500	0
DLPEHAVLK	9	0	1020.56	Q8VEK3	Q8VEK3	603	611	Hnrnpu	Heterogeneous nuclear ribonucleoprotein U	yes	yes	2	0.00035308	98.458	6317700	6317700	0	6317700	0
EHVIEALRR	9	1	1121.63	I7HLV2;Q6ZWV3;P86048	I7HLV2	146	154	Rpl10;Rpl10l	60S ribosomal protein L10;60S ribosomal protein L10-like	yes	no	2;3	0.001864	98.299	7024300	7024300	0	7024300	0
LIEVDDER	8	0	987.487	P62754	P62754	15	22	Rps6	40S ribosomal protein S6	yes	yes	2	0.0022498	98.299	4652500	4652500	0	4652500	0
TVEVLEPEVTK	11	0	1242.67	A0A0U1RQ05;A0A0R4J119;Q7TMB8;Q5SQX6	A0A0U1RQ05	81	91	Cyfip1;Cyfip2	Cytoplasmic FMR1-interacting protein 1;Cytoplasmic FMR1-interacting protein 2	yes	no	2	0.002901	98.249	20107000	20107000	0	20107000	0
TVTAMDVVYALKR	13	1	1465.8	P62806	P62806	81	93	Hist1h4a	Histone H4	yes	yes	2;3	0.00039603	98.249	10734000	10734000	0	10734000	0
ALLFVPR	7	0	814.507	P07901	P07901	340	346	Hsp90aa1	Heat shock protein HSP 90-alpha	yes	yes	2	0.01316	98.03	89592000	89592000	0	89592000	0
YFTEAGLKELSEYVR	15	1	1803.9	A0A087WPF9;A0A087WQS2;Q9CQC6	A0A087WPF9	173	187	Bzw1	Basic leucine zipper and W2 domain-containing protein 1	yes	no	3	0.004729	97.836	20602000	20602000	0	20602000	0
HLEDIVEK	8	0	981.513	A2AVJ7;Q99PL5	A2AVJ7	1234	1241	Rrbp1	Ribosome-binding protein 1	yes	no	2	0.0021299	97.798	5847300	5847300	0	5847300	0
AAGAAAIITEPEHTK	15	0	1478.77	Q8BK67;A2AWQ2	Q8BK67	76	90	Rcc2	Protein RCC2	yes	no	2;3	0.0021572	97.456	19006000	19006000	0	19006000	0
ADPDVLTEVPAALKR	15	1	1593.87	Q9D0D5	Q9D0D5	2	16	Gtf2e1	General transcription factor IIE subunit 1	yes	yes	2	0.00041035	97.214	29840000	29840000	0	29840000	0
DVEETGITVASVER	14	0	1503.74	Q3TIV5	Q3TIV5	341	354	Zc3h15	Zinc finger CCCH domain-containing protein 15	yes	yes	2	0.00026869	97.214	10597000	10597000	0	10597000	0
TTLVELPIAK	10	0	1083.65	H9KV01;H9KV15;H9KV00;Q9QX47	H9KV01	285	294	Son	Protein SON	yes	no	2	4.0583e-14	96.948	4029300	4029300	0	4029300	0
APILIATDVASR	12	0	1225.7	Q3TU25;Q3U741;Q501J6;S4R1I6;Q8BTS0;Q61656	S4R1I6	392	403	Ddx17;Ddx5	Probable ATP-dependent RNA helicase DDX17;Probable ATP-dependent RNA helicase DDX5	no	no	2	7.6795e-14	96.89	33790000	33790000	0	33790000	0
KEDMTYAVR	9	1	1111.53	H7BX95;Q6PDM2;F7AI47	H7BX95	165	173	Srsf1	Serine/arginine-rich splicing factor 1	yes	no	2	0.001497	96.668	6632200	6632200	0	6632200	0
SYELPDGQVITIGNER	16	0	1789.88	P63260;P60710;E9Q5F4;E9Q1F2;P63268;P68134;P68033;P62737;Q8BFZ3;A0A0U1RQ96	P63260	239	254	Actg1;Actb;Actg2;Acta1;Actc1;Acta2;Actbl2	Actin, cytoplasmic 2;Actin, cytoplasmic 2, N-terminally processed;Actin, cytoplasmic 1;Actin, cytoplasmic 1, N-terminally processed;Actin, gamma-enteric smooth muscle;Actin, alpha skeletal muscle;Actin, alpha cardiac muscle 1;Actin, aortic smooth muscle;Beta-actin-like protein 2	yes	no	2	0.0091195	96.64	20082000	20082000	0	20082000	0
GLFTGLTPR	9	0	960.539	A2AFW6;Q9D050;Q791V5	A2AFW6	69	77	Mtch2	Mitochondrial carrier homolog 2	yes	no	2	0.00027085	96.492	2364600	2364600	0	2364600	0
SLESLDTSLFAK	12	0	1309.68	Q9D554	Q9D554	292	303	Sf3a3	Splicing factor 3A subunit 3	yes	yes	2	1.3528e-08	96.342	34275000	34275000	0	34275000	0
SAPLPLTVEEFAPAK	15	0	1568.85	F6RJ39;Q9JIX8	F6RJ39	472	486	Acin1	Apoptotic chromatin condensation inducer in the nucleus	yes	no	2	0.0016288	96.334	25087000	25087000	0	25087000	0
TLEVEIEPGVR	11	0	1240.67	Q99KV1	Q99KV1	207	217	Dnajb11	DnaJ homolog subfamily B member 11	yes	yes	2	1.6066e-07	96.331	12289000	12289000	0	12289000	0
LLDMDGIIVEK	11	0	1244.67	P23116	P23116	341	351	Eif3a	Eukaryotic translation initiation factor 3 subunit A	yes	yes	2	1.6326e-07	96.143	13436000	13436000	0	13436000	0
VVDLMAYMASKE	12	1	1355.65	S4R1W1;A0A1D5RLD8;A0A0A0MQF6;P16858	S4R1W1	322	333	Gm3839;Gapdh	Glyceraldehyde-3-phosphate dehydrogenase	yes	no	2	2.0205e-06	96.015	9232100	9232100	0	9232100	0
ERHPGSFDVVHVK	13	1	1505.77	P62702	P62702	199	211	Rps4x	40S ribosomal protein S4, X isoform	yes	yes	3;4	1.3491e-12	95.981	23512000	23512000	0	23512000	0
EAGFLRPVTIFGPIADVAR	19	1	2028.12	A0A0U1RPW2;B9EHJ3;P39447	A0A0U1RPW2	640	658	Tjp1	Tight junction protein ZO-1	yes	no	3	2.4858e-69	95.666	0	0	0	0	0
FDDPLLGPR	9	0	1028.53	Q8BMJ2	Q8BMJ2	1120	1128	Lars	Leucine--tRNA ligase, cytoplasmic	yes	yes	2	0.00023067	95.531	1702600	1702600	0	1702600	0
VSELKEELK	9	1	1073.6	Q8VEK3	Q8VEK3	13	21	Hnrnpu	Heterogeneous nuclear ribonucleoprotein U	yes	yes	2	0.00077307	95.502	2527800	2527800	0	2527800	0
VTAEVVLVHPGGGSTSR	17	0	1664.88	Q91YQ5;A0A0N4SUJ8	Q91YQ5	50	66	Rpn1	Dolichyl-diphosphooligosaccharide--protein glycosyltransferase subunit 1	yes	no	2;3	5.2769e-06	95.401	123280000	123280000	0	123280000	0
LSTLPSDFCGLTHLVK	16	0	1786.93	Q922Q8	Q922Q8	51	66	Lrrc59	Leucine-rich repeat-containing protein 59	yes	yes	2	0.012607	95.401	17369000	17369000	0	17369000	0
GLAHAIR	7	0	736.434	P15626;D3YVP6;Q80W21;Q8R5I6;E9PVM7;P48774;E9Q5L9;E9Q024	P15626	12	18	Gstm2;Gstm7;Gstm4;Gstm5	Glutathione S-transferase Mu 2;Glutathione S-transferase Mu 7;Glutathione S-transferase Mu 5	no	no	2	0.013865	95.378	66409000	66409000	0	66409000	0
FAEAFEAIPR	10	0	1149.58	H3BL49;P42932;H3BJB6	H3BL49	382	391	Cct8	T-complex protein 1 subunit theta	yes	no	2	6.9247e-06	95.358	8446900	8446900	0	8446900	0
IFVFEPPPGVK	11	0	1228.69	Q9JHU4	Q9JHU4	4142	4152	Dync1h1	Cytoplasmic dynein 1 heavy chain 1	yes	yes	2	1.7765e-07	95.099	6399500	6399500	0	6399500	0
MLLEFTDTSYEEKR	14	1	1760.83	E9PVM7;P48774;E9Q5L9;E9Q024	E9PVM7	22	35	Gstm5	Glutathione S-transferase Mu 5	yes	no	2	0.020723	94.801	9633100	9633100	0	9633100	0
TNEGVIEFR	9	0	1063.53	Q3TWW8	Q3TWW8	146	154	Srsf6	Serine/arginine-rich splicing factor 6	yes	yes	2	0.00041062	94.692	7365200	7365200	0	7365200	0
IKATVEELKEK	11	2	1286.74	Q5SUF2	Q5SUF2	223	233	Luc7l3	Luc7-like protein 3	yes	yes	2	1.9069e-05	94.692	4287300	4287300	0	4287300	0
ELISNASDALDKIR	14	1	1543.82	P11499;E9PX27;D3Z1R1;P08113	P11499	42	55	Hsp90ab1;Hsp90b1	Heat shock protein HSP 90-beta;Endoplasmin	no	no	3	2.7261e-05	94.551	2379300	2379300	0	2379300	0
VLEGMDVVR	9	0	1016.53	P24369	P24369	172	180	Ppib	Peptidyl-prolyl cis-trans isomerase B	yes	yes	2	0.00084919	94.302	13021000	13021000	0	13021000	0
TSPDTLRR	8	1	944.504	Q62093	Q62093	25	32	Srsf2	Serine/arginine-rich splicing factor 2	yes	yes	3	0.0024091	94.302	4060200	4060200	0	4060200	0
TVGEYLQR	8	0	964.498	Q8VIM6	Q8VIM6	714	721	Strc	Stereocilin	yes	yes	2	0.0042229	94.262	17403000	0	17403000	0	89421000
KGEKDIPGLTDTTVPR	16	2	1725.93	P62754	P62754	116	131	Rps6	40S ribosomal protein S6	yes	yes	2;4	8.9321e-05	94.191	17964000	17964000	0	17964000	0
AALSGLLHR	9	0	936.551	D3YXU1;Q99JY0	D3YXU1	83	91	Hadhb	Trifunctional enzyme subunit beta, mitochondrial;3-ketoacyl-CoA thiolase	yes	no	2;3	0.014121	94.114	89461000	89461000	0	89461000	0
HLCEPGADGAETFADGVPR	19	0	1997.89	F6WR45;E9QAS4;E9PYU4;E9QAS5;E9PYL1;Q6PDQ2;A2A8L1	F6WR45	346	364	Chd4;Chd5	Chromodomain-helicase-DNA-binding protein 4;Chromodomain-helicase-DNA-binding protein 5	yes	no	2;3	3.193e-33	94.01	5789700	5789700	0	5789700	0
VVASDKETYELR	12	1	1408.72	Q9D7S7	Q9D7S7	96	107	Rpl22l1	60S ribosomal protein L22-like 1	yes	yes	3	9.4442e-07	93.959	3349400	3349400	0	3349400	0
TIRYPDPLIK	10	1	1214.7	P62702	P62702	146	155	Rps4x	40S ribosomal protein S4, X isoform	yes	yes	2	0.0011672	93.649	14770000	14770000	0	14770000	0
YEEIVKEVSTYIKK	14	2	1727.93	P10126;D3YZ68;D3Z3I8	P10126	167	180	Eef1a1	Elongation factor 1-alpha 1	yes	no	2;4	0.00078605	93.258	86699000	86699000	0	86699000	0
AAIAAAAAAAAAK	13	0	1040.6	Q9CR57	Q9CR57	148	160	Rpl14	60S ribosomal protein L14	yes	yes	2	0.00014061	93.178	8739400	8739400	0	8739400	0
ALAAAGYDVEK	11	0	1106.56	P15864;I7HFT9;Q07133;P43274;P43277	P43274	65	75	Hist1h1c;Hist1h1t;Hist1h1e;Hist1h1d	Histone H1.2;Histone H1t;Histone H1.4;Histone H1.3	no	no	2	6.157e-05	93.111	24639000	24639000	0	24639000	0
TRYFPVFEK	9	1	1185.62	P24472	P24472	130	138	Gsta4	Glutathione S-transferase A4	yes	yes	2	0.0073836	93.111	14207000	14207000	0	14207000	0
KGEDALFTTR	10	1	1136.58	Q8BU14	Q8BU14	66	75	Sec62	Translocation protein SEC62	yes	yes	2	2.2708e-45	93.096	0	0	0	0	0
IILDLISESPIK	12	0	1339.8	H3BLP7;A0A286YDM3;H3BK96;H3BKD0;H3BLL4;B2M1R6;P61979	H3BLP7	5	16	Hnrnpk	Heterogeneous nuclear ribonucleoprotein K	yes	no	2	7.6503e-05	93.058	12943000	12943000	0	12943000	0
VLALSVETEYTFPLTEK	17	0	1939.02	P14869	P14869	248	264	Rplp0	60S acidic ribosomal protein P0	yes	yes	2	3.7948e-06	93.011	21209000	21209000	0	21209000	0
LLQDSVDFSLADAINTEFK	19	0	2125.06	A2AKJ2;A0A0A6YWC8;P20152	A2AKJ2	79	97	Vim	Vimentin	yes	no	2	1.493e-06	92.468	11602000	0	0	0	0
AVDSLVPIGR	10	0	1025.59	Q03265;D3Z6F5	Q03265	195	204	Atp5a1	ATP synthase subunit alpha, mitochondrial;ATP synthase subunit alpha	yes	no	2	0.00068342	92.439	21819000	21819000	0	21819000	0
TPVEPEVAIHR	11	0	1246.67	P60867	P60867	9	19	Rps20	40S ribosomal protein S20	yes	yes	2	3.3368e-48	92.051	0	0	0	0	0
SETAPAAPAAPAPVEK	16	0	1505.77	P43277	P43277	2	17	Hist1h1d	Histone H1.3	yes	yes	2	0.0024963	91.914	39835000	39835000	0	39835000	0
HHLDGETEEERIR	13	1	1619.77	A2AE89;P10649;F6WHQ7	A2AE89	84	96	Gstm1	Glutathione S-transferase Mu 1	yes	no	4	3.9103e-05	91.914	8375000	8375000	0	8375000	0
LYSEFLGK	8	0	955.501	A2AE89;P10649;F6WHQ7;D3YVP8;P15626;D3YX76;D3YVP6;Q80W21;E9QAC8;D3YVP5;D3YVP9;G5E8M7;O35660	A2AE89	163	170	Gstm1;Gstm6;Gstm2;Gstm7	Glutathione S-transferase Mu 1;Glutathione S-transferase Mu 2;Glutathione S-transferase Mu 7;Glutathione S-transferase Mu 6	no	no	2	0.014936	91.906	242900000	242900000	0	242900000	0
LHYGLPVVVK	10	0	1123.68	F7BAC9;E9Q6A9;Q02248	F7BAC9	50	59	Ctnnb1	Catenin beta-1	yes	no	2	0.00083192	91.906	1973400	1973400	0	1973400	0
EIEVGGGRK	9	1	943.509	P62082	P62082	50	58	Rps7	40S ribosomal protein S7	yes	yes	2	1.0514e-44	91.906	0	0	0	0	0
IEDVTPIPSDSTR	13	0	1428.71	P62264	P62264	129	141	Rps14	40S ribosomal protein S14	yes	yes	2	0.00014923	91.855	13511000	13511000	0	13511000	0
TSASIILR	8	0	859.513	P11983	P11983	371	378	Tcp1	T-complex protein 1 subunit alpha	yes	yes	2	0.01621	91.626	2920700	2920700	0	2920700	0
DIILPFR	7	0	872.512	Q3TWV4;P84091	Q3TWV4	280	286	Ap2m1	AP-2 complex subunit mu	yes	no	2	1.59e-05	91.584	10557000	10557000	0	10557000	0
FVGDADLER	9	0	1020.49	E9Q8Z4;E9Q8Z9;D3Z2H2;E9Q903;E9Q901;E9Q904;G3X9V2;E9Q8Z5;E9Q8Z6;E9Q8Z8;P30999	E9Q8Z4	5	13	Ctnnd1	Catenin delta-1	yes	no	2	0.0042106	91.318	4286800	4286800	0	4286800	0
YYVTIIDAPGHRDFIK	16	1	1906.99	P10126;D3YZ68;D3Z3I8	P10126	85	100	Eef1a1	Elongation factor 1-alpha 1	yes	no	3;4	1.5503e-21	91.076	191940000	191940000	0	191940000	0
TLAPGLFFR	9	0	1020.58	Z4YKT6;Q99J47	Z4YKT6	285	293	Dhrs7b	Dehydrogenase/reductase SDR family member 7B	yes	no	2	0.0045224	91.041	1615400	1615400	0	1615400	0
GMGGAFVLVLYDEIK	15	0	1610.84	P48962;P51881	P48962	281	295	Slc25a4;Slc25a5	ADP/ATP translocase 1;ADP/ATP translocase 2;ADP/ATP translocase 2, N-terminally processed	yes	no	2	2.1364e-05	91.03	16835000	16835000	0	16835000	0
TVTEYKIEEDGKK	13	2	1538.78	Q9Z1D1	Q9Z1D1	66	78	Eif3g	Eukaryotic translation initiation factor 3 subunit G	yes	yes	3;4	1.8294e-07	90.926	9615600	9615600	0	9615600	0
LPVALDPGSK	10	0	995.565	Q91YQ5	Q91YQ5	118	127	Rpn1	Dolichyl-diphosphooligosaccharide--protein glycosyltransferase subunit 1	yes	yes	2	0.0011107	90.906	3472300	3472300	0	3472300	0
TGAESISLLELCR	13	0	1447.73	Q61550	Q61550	578	590	Rad21	Double-strand-break repair protein rad21 homolog	yes	yes	2	0.0011565	90.685	3950400	3950400	0	3950400	0
LLVATSVAAR	10	0	999.608	F8WHR6;Q569Z5	F8WHR6	668	677	Ddx46	Probable ATP-dependent RNA helicase DDX46	yes	no	2	0.0011801	90.657	3765500	3765500	0	3765500	0
EFVEAVLELR	10	0	1203.65	Q9QZQ8	Q9QZQ8	240	249	H2afy	Core histone macro-H2A.1	yes	yes	2	0.0011877	90.629	3378900	3378900	0	3378900	0
IAGSFLPFLDEDRLEDLGVSSLEER	25	1	2806.4	E9PYG9;F6TVP2;Q60710	E9PYG9	105	129	Samhd1	Deoxynucleoside triphosphate triphosphohydrolase SAMHD1	yes	no	3	0.0006523	90.475	22329000	22329000	0	22329000	0
ITVTSEVPFSKR	12	1	1362.75	P67984	P67984	70	81	Rpl22	60S ribosomal protein L22	yes	yes	2;3	0.0035237	90.108	56199000	56199000	0	56199000	0
IEFDDFEECLLR	12	0	1584.71	B1ARW4;Q99LY9	B1ARW4	58	69	Ndufs5	NADH dehydrogenase [ubiquinone] iron-sulfur protein 5;NADH dehydrogenase [ubiquinone] iron-sulfur protein 5, N-terminally processed	yes	no	2	0.0006549	90.108	6977700	6977700	0	6977700	0
SEAGLAGAPAR	11	0	998.515	Q9DCR2	Q9DCR2	150	160	Ap3s1	AP-3 complex subunit sigma-1	yes	yes	2	0.00068649	89.698	660300	660300	0	660300	0
GLALDGK	7	0	672.381	F7DF62;J3QNU6;Q8BWG8	F7DF62	27	33	Arrb1	Beta-arrestin-1	yes	no	1	0.018316	89.673	15383000	15383000	0	15383000	0
VYADGIFDLFHSGHAR	16	0	1803.87	P49586;Q811Q9;D3Z3T5	P49586	79	94	Pcyt1a;Pcyt1b	Choline-phosphate cytidylyltransferase A;Choline-phosphate cytidylyltransferase B	yes	no	3	0.0013908	89.466	14608000	14608000	0	14608000	0
KVEEAEPEEFVVEK	14	1	1660.82	Q9DCC5;P23198;D3Z1A9;D3Z313	Q9DCC5	21	34	Cbx3	Chromobox protein homolog 3	yes	no	2	0.0048279	89.301	22201000	22201000	0	22201000	0
DLANIAEVEVSIPAK	15	0	1567.85	Q8VDJ3;A0A087WP83	Q8VDJ3	649	663	Hdlbp	Vigilin	yes	no	2	0.00070322	89.301	17310000	17310000	0	17310000	0
VDFSITK	7	0	808.433	F8WJG3;P62996	F8WJG3	91	97	Tra2b	Transformer-2 protein homolog beta	yes	no	1	0.018893	89.296	5056600	5056600	0	5056600	0
MLVDVFAPEFR	11	0	1322.67	Q3UMB9	Q3UMB9	993	1003	Kiaa1033	WASH complex subunit 7	yes	yes	2	0.00098137	89.247	3800400	3800400	0	3800400	0
GYELLFQPEVVR	12	0	1448.77	E9Q8Z4;E9Q8Z9;D3Z2H2;E9Q903;E9Q901;E9Q904;G3X9V2;E9Q8Z5;E9Q8Z6;E9Q8Z8;P30999;D3Z2H7;E9Q986;D3Z7H6;E9Q906;E9Q907;E9Q905	E9Q8Z4	585	596	Ctnnd1	Catenin delta-1	yes	no	2	0.0039256	89.247	2630100	2630100	0	2630100	0
VKEVVKK	7	2	828.543	P11499	P11499	198	204	Hsp90ab1	Heat shock protein HSP 90-beta	yes	yes	2	5.8091e-05	89.123	6156200	6156200	0	6156200	0
DTTVTGLGR	9	0	918.477	Q8BMS1	Q8BMS1	391	399	Hadha	Trifunctional enzyme subunit alpha, mitochondrial;Long-chain enoyl-CoA hydratase;Long chain 3-hydroxyacyl-CoA dehydrogenase	yes	yes	2	0.015453	88.954	5329500	5329500	0	5329500	0
HFFTVTDPR	9	0	1118.55	A0A494BB84;Q3U4F0;Q91V61	A0A494BB84	26	34	Sfxn3	Sideroflexin-3	yes	no	2	0.01553	88.942	4554700	4554700	0	4554700	0
DVATFLR	7	0	820.444	Q9D0M3	Q9D0M3	269	275	Cyc1	Cytochrome c1, heme protein, mitochondrial	yes	yes	2	4.2028e-32	88.734	0	0	0	0	0
AATAGGGPGAAAGAVGAGGAAAASGLAVYR	30	0	2370.2	Q3UNN4;P97496;Q3UZD0	Q3UNN4	2	31	Smarcc1	SWI/SNF complex subunit SMARCC1	yes	no	3	8.915e-09	88.517	7924300	7924300	0	7924300	0
SVEAAAELSAK	11	0	1074.56	Q9D0J8	Q9D0J8	5	15	Ptms	Parathymosin	yes	yes	2	0.0014731	88.496	6413900	6413900	0	6413900	0
SEAVVEYVFSGSR	13	0	1428.69	Q3TJ56;Q78PY7	Q3TJ56	527	539	Snd1	Staphylococcal nuclease domain-containing protein 1	yes	no	2	0.0017358	88.441	7235200	7235200	0	7235200	0
LPIFFFGTHETAFLGPK	17	0	1921.01	F6RB63;A2BI12;Q99JF8	F6RB63	40	56	Psip1	PC4 and SFRS1-interacting protein	yes	no	2;3	0.00027642	88.187	18798000	18798000	0	18798000	0
VCTLAIIDPGDSDIIR	16	0	1756.9	A0A2I3BQF4;P62889	A0A2I3BQF4	70	85	Rpl30	60S ribosomal protein L30	yes	no	2	0.0007076	88.187	13723000	13723000	0	13723000	0
FALGISAINEAVDSGDVGR	19	0	1889.95	Q9JKF1	Q9JKF1	623	641	Iqgap1	Ras GTPase-activating-like protein IQGAP1	yes	yes	2	1.0926e-05	88.087	11309000	11309000	0	11309000	0
VTLLDGTEYSCDLEKR	16	1	1897.91	Q80UE5;O70318;A0A1W2P6I5;Q80UE4;Q8C928	Q80UE5	215	230	Epb4.1l2;Epb41l2	Band 4.1-like protein 2	yes	no	3	0.00026577	87.932	13450000	13450000	0	13450000	0
YGGPYHIGGSPFK	13	0	1378.67	B7FAV1;B7FAU9;Q8BTM8	B7FAV1	2437	2449	Flna	Filamin-A	yes	no	2	0.0031743	87.913	5357600	5357600	0	5357600	0
LLDAVDTYIPVPTR	14	0	1571.86	Q8BFR5;A0A0U1RNQ6	Q8BFR5	239	252	Tufm	Elongation factor Tu, mitochondrial	yes	no	2	0.0022031	87.363	23708000	23708000	0	23708000	0
TITLEVEPSDTIENVK	16	0	1786.92	A0A0A6YW67;E9Q9J0;E9Q4P0;E9Q5F6;E9QNP0;Q5SX22;P62984;P62983;P0CG49;P0CG50	A0A0A6YW67	12	27	Gm8797;Uba52;Kxd1;Ubc;Ubb;Rps27a	Ubiquitin-60S ribosomal protein L40;Ubiquitin;60S ribosomal protein L40;Ubiquitin-40S ribosomal protein S27a;Ubiquitin;40S ribosomal protein S27a;Polyubiquitin-B;Ubiquitin;Polyubiquitin-C;Ubiquitin;Ubiquitin-related 1;Ubiquitin-related 2	yes	no	2	0.0004882	87.363	8306100	8306100	0	8306100	0
AATAAVPGAAAGR	13	0	1082.58	Q8CHW4	Q8CHW4	2	14	Eif2b5	Translation initiation factor eIF-2B subunit epsilon	yes	yes	2	0.0017642	87.308	5524700	5524700	0	5524700	0
SSHYDELLAAEAR	13	0	1460.69	Q3TJ56;Q78PY7	Q3TJ56	473	485	Snd1	Staphylococcal nuclease domain-containing protein 1	yes	no	2;3	0.0030562	87.298	16512000	16512000	0	16512000	0
ASGVAVSDGVIK	12	0	1101.6	A0A494B9A7;F8WGL3;P18760	A0A494B9A7	2	13	Cfl1	Cofilin-1	yes	no	2	0.0017803	87.298	5614500	5614500	0	5614500	0
SLGTADVHFER	11	0	1230.6	G3X9I4;Q9JJW6;O08583	G3X9I4	114	124	Alyref2;Alyref	Aly/REF export factor 2;THO complex subunit 4	yes	no	2;3	0.00021923	87.184	48284000	48284000	0	48284000	0
DLDKPFLLPVESVYSIPGR	19	1	2144.15	Q8BFR5;A0A0U1RNQ6	Q8BFR5	253	271	Tufm	Elongation factor Tu, mitochondrial	yes	no	3	0.0069772	87.16	33620000	33620000	0	33620000	0
TGAHLELSLAK	11	0	1138.63	Q8VDJ3;A0A087WP83;A0A087WQY9;A0A087WPC5;A0A087WS92	Q8VDJ3	111	121	Hdlbp	Vigilin	yes	no	2	0.0023539	87.149	6392000	6392000	0	6392000	0
DGTGVVEFVR	10	0	1077.55	H7BX95;Q6PDM2;F7AI47	H7BX95	155	164	Srsf1	Serine/arginine-rich splicing factor 1	yes	no	2	0.012934	86.67	27398000	27398000	0	27398000	0
FLASVSTVLTSK	12	0	1251.71	Q91VB8;P01942	Q91VB8	129	140	haemaglobin alpha 2;Hba	Hemoglobin subunit alpha	yes	no	2	0.0043219	86.624	14529000	14529000	0	14529000	0
VIPHFTATADAFKEDR	16	1	1816.91	Q921X9	Q921X9	430	445	Pdia5	Protein disulfide-isomerase A5	yes	yes	4	0.0022122	86.378	3289800	3289800	0	3289800	0
KKETITESAGR	11	2	1218.66	A0A0A6YVS2;Q921L3	A0A0A6YVS2	65	75	Tmco1	Transmembrane and coiled-coil domain-containing protein 1	yes	no	3	0.00011274	86.344	6199300	6199300	0	6199300	0
GTAYVVYEDIFDAK	14	0	1589.76	A0A1W2P7L7;P59708	A0A1W2P7L7	48	61	Sf3b6	Splicing factor 3B subunit 6	yes	no	2	0.002911	86.313	31770000	31770000	0	31770000	0
ILGLLDTHLK	10	0	1121.68	Q9D8N0	Q9D8N0	138	147	Eef1g	Elongation factor 1-gamma	yes	yes	2	0.010791	86.136	78988000	78988000	0	78988000	0
IIGATDSSGELMFLMK	16	0	1711.85	Q9DCC5;P23198;Q7TPM0;Q9CYJ8;P83917	Q9DCC5	126	141	Cbx3;Cbx1	Chromobox protein homolog 3;Chromobox protein homolog 1	yes	no	2	0.0028835	86.114	5614000	5614000	0	5614000	0
EAYPGDVFYLHSR	13	0	1552.73	Q03265;D3Z6F5	Q03265	335	347	Atp5a1	ATP synthase subunit alpha, mitochondrial;ATP synthase subunit alpha	yes	no	2	5.64e-30	86.014	0	0	0	0	0
VGLKAPGIIPR	11	1	1119.71	Q03265;D3Z6F5	Q03265	172	182	Atp5a1	ATP synthase subunit alpha, mitochondrial;ATP synthase subunit alpha	yes	no	3	2.7495e-06	85.958	20099000	20099000	0	20099000	0
HLLIGLPSGAILSLPK	16	0	1628	Z4YJW0;Q8C7X2	Z4YJW0	864	879	Emc1	ER membrane protein complex subunit 1	yes	no	2;3	0.00076883	85.958	6259500	6259500	0	6259500	0
KAPDFVFYAPR	11	1	1309.68	A0A5F8MPB9;P26041;P26043;Q7TSG6;P26040	A0A5F8MPB9	263	273	Msn;Rdx;Ezr	Moesin;Radixin;Ezrin	yes	no	2	0.015331	85.731	20614000	20614000	0	20614000	0
VFDFAGEEVR	10	0	1167.56	O88271	O88271	164	173	Cfdp1	Craniofacial development protein 1	yes	yes	2	0.014011	85.676	26860000	26860000	0	26860000	0
LTSDDVKEQIYK	12	1	1437.74	A0A0U1RQ71;Q921R2;P62301	A0A0U1RQ71	28	39	Rps13	40S ribosomal protein S13	yes	no	2	0.015969	85.377	25193000	25193000	0	25193000	0
GASKEILSEVER	12	1	1316.69	F6Q609;E9Q133;Q3U0I3;P80318	F6Q609	236	247	Cct3	T-complex protein 1 subunit gamma	yes	no	2	0.01592	85.355	4870000	4870000	0	4870000	0
LFYADHPFIFLVR	13	0	1636.88	P19324	P19324	380	392	Serpinh1	Serpin H1	yes	yes	2	0.0047776	85.29	8416700	8416700	0	8416700	0
VLSGAVAAEAAEAK	14	0	1285.69	Q9JLI8	Q9JLI8	38	51	Sart3	Squamous cell carcinoma antigen recognized by T-cells 3	yes	yes	2	0.0030422	85.288	8408100	8408100	0	8408100	0
MTLDTLSIYETPSMGLLDKK	20	1	2255.14	Q8JZQ9	Q8JZQ9	430	449	Eif3b	Eukaryotic translation initiation factor 3 subunit B	yes	yes	3	6.3527e-06	85.087	16609000	16609000	0	16609000	0
NIVEAAAVR	9	0	941.529	P62855	P62855	43	51	Rps26	40S ribosomal protein S26	yes	yes	2	3.5475e-23	85.064	0	0	0	0	0
TAVAPIER	8	0	855.481	P48962;P51881;Q3V132	P48962	24	31	Slc25a4;Slc25a5;Slc25a31	ADP/ATP translocase 1;ADP/ATP translocase 2;ADP/ATP translocase 2, N-terminally processed;ADP/ATP translocase 4;ADP/ATP translocase 4, N-terminally processed	yes	no	2	9.6145e-05	84.568	62294000	62294000	0	62294000	0
TVDREELKPIR	11	2	1354.76	A0A494BAD3;P97742	A0A494BAD3	285	295	Cpt1a	Carnitine O-palmitoyltransferase 1, liver isoform	yes	no	3	1.3487e-06	84.479	6489500	6489500	0	6489500	0
IEKLEEYITTSK	12	1	1452.77	Q9CU62	Q9CU62	435	446	Smc1a	Structural maintenance of chromosomes protein 1A	yes	yes	3	1.2843e-06	84.365	4646800	4646800	0	4646800	0
GTEDFIVESLDASFR	15	0	1684.79	A0A286YDB7;A0A286YCT4;A0A286YCG8;Q9CY50	A0A286YDB7	94	108	Ssr1	Translocon-associated protein subunit alpha	yes	no	2	0.0019878	84.289	5580400	5580400	0	5580400	0
VAPAPAVVK	9	0	850.528	P12970	P12970	12	20	Rpl7a	60S ribosomal protein L7a	yes	yes	2	1.4615e-05	84.244	6430900	6430900	0	6430900	0
YYVTIIDAPGHR	12	0	1403.72	P10126;D3YZ68;D3Z3I8	P10126	85	96	Eef1a1	Elongation factor 1-alpha 1	yes	no	2	0.0039957	84.213	94431000	94431000	0	94431000	0
FVFGTTPEDILR	12	0	1393.72	Q80YQ1;P35441	Q80YQ1	217	228	Thbs1	Thrombospondin-1	yes	no	2	0.0039685	84.17	33433000	33433000	0	33433000	0
FAAATGATPIAGR	13	0	1202.64	A0A1L1SRW0;P14206	A0A1L1SRW0	6	18	Rpsa	40S ribosomal protein SA	yes	no	2	0.0042139	84.17	11961000	11961000	0	11961000	0
SFDAVVFDVLK	11	0	1238.65	A0A087WQA4;A0A0A6YXI6;A0A087WPL3;A0A087WQ61;A0A087WQU0;Q8C134;Q9ERD6	A0A087WQA4	37	47	Ralgps2	Ras-specific guanine nucleotide-releasing factor RalGPS2	yes	no	2	0.0022809	84.17	7125400	7125400	0	7125400	0
VAEITGVVETAK	12	0	1215.67	A2AQ19	A2AQ19	407	418	Rtf1	RNA polymerase-associated protein RTF1 homolog	yes	yes	2	0.0075451	83.862	6737400	6737400	0	6737400	0
SLEEIYLFSLPIK	13	0	1550.86	D3YVC1;D3YWJ3;P25444	D3YVC1	77	89	Rps2	40S ribosomal protein S2	yes	no	2	1.3945e-29	83.862	0	0	0	0	0
SIEIESSDVIR	11	0	1246.64	Q3UKJ7	Q3UKJ7	2	12	Smu1	WD40 repeat-containing protein SMU1;WD40 repeat-containing protein SMU1, N-terminally processed	yes	yes	2	3.5049e-26	83.783	0	0	0	0	0
LASGGADLALGSIEK	15	0	1400.75	A0A0U1RPJ3;Q8CGN5	A0A0U1RPJ3	94	108	Plin1	Perilipin-1	yes	no	2	0.0021852	83.617	28067000	28067000	0	28067000	0
ESELTDEDIVTILER	15	0	1760.87	F6Z6F4;Q6PGB8	F6Z6F4	680	694	Smarca1	Probable global transcription activator SNF2L1	yes	no	2	0.0021852	83.617	9665100	9665100	0	9665100	0
NILFVITKPDVYK	13	1	1548.89	Q60817;P70670	Q60817	101	113	Naca	Nascent polypeptide-associated complex subunit alpha;Nascent polypeptide-associated complex subunit alpha, muscle-specific form	yes	no	2	0.020782	83.31	3712700	3712700	0	3712700	0
KATGPPVSELITK	13	1	1339.77	P43276	P43276	34	46	Hist1h1b	Histone H1.5	yes	yes	2	0.019877	83.137	8330700	8330700	0	8330700	0
GLVAVVTGGASGLGLATAK	19	0	1640.95	Q99N15;A2AFQ2	Q99N15	10	28	Hsd17b10		yes	no	2	6.0462e-35	83.087	0	0	0	0	0
VASIETGLAAAAAK	14	0	1271.71	Q80TJ7;Q9WTU0	Q80TJ7	865	878	Phf8;Phf2	Histone lysine demethylase PHF8;Lysine-specific demethylase PHF2	yes	no	2	0.01785	82.831	4221700	4221700	0	4221700	0
GIAYIEFK	8	0	939.507	P09405	P09405	432	439	Ncl	Nucleolin	yes	yes	1	0.0022513	82.671	6647900	6647900	0	6647900	0
ALEEALEAKEELER	14	1	1628.83	A0A2R8VHF9;E9QPE7;A0A338P6K2;O08638	A0A2R8VHF9	1491	1504	Myh11	Myosin-11	yes	no	2;3	0.0031099	82.55	31213000	31213000	0	31213000	0
IFYPETTDIYDRK	13	1	1659.81	Q9JKF1;A0A0U1RNG5	Q9JKF1	131	143	Iqgap1	Ras GTPase-activating-like protein IQGAP1	yes	no	2;3	0.0057894	82.417	19920000	19920000	0	19920000	0
LGGVSSTEELDIR	13	0	1374.7	A2AIR2;Q5DTM8;A2AIR1;A2AIR0	A2AIR2	37	49	Rnf20	E3 ubiquitin-protein ligase BRE1A	yes	no	2	0.0033319	82.417	9537300	9537300	0	9537300	0
GFAFVTFESPADAKDAAR	18	1	1898.92	A2AFI4;A2AFI3;A0A2I3BRL8;Q91VM5;Q9WV02	A2AFI4	50	67	Rbmx;Rbmxl1	RNA binding motif protein, X-linked-like-1;RNA-binding motif protein, X chromosome;RNA-binding motif protein, X chromosome, N-terminally processed	yes	no	2	0.0015854	82.362	5375200	5375200	0	5375200	0
KIFDIDEAEEAIKDVK	16	2	1861.97	Q99L45;E0CXJ3	Q99L45	87	102	Eif2s2	Eukaryotic translation initiation factor 2 subunit 2	yes	no	2	5.156e-27	82.362	0	0	0	0	0
SIYYITGESK	10	0	1159.58	P11499;E9Q0C3	P11499	482	491	Hsp90ab1	Heat shock protein HSP 90-beta	yes	no	2	0.01053	82.287	114100000	114100000	0	114100000	0
GVTIKPTVDDD	11	1	1158.58	Q9Z0N1	Q9Z0N1	462	472	Eif2s3x	Eukaryotic translation initiation factor 2 subunit 3, X-linked	yes	yes	2	0.0064935	82.279	0	0	0	0	0
VAELSSDDFHLDR	13	0	1502.7	F8WHM5;Q61543	F8WHM5	283	295	Glg1	Golgi apparatus protein 1	yes	no	3	0.0042753	82.069	2402200	2402200	0	2402200	0
VLLATLSIPITPERTDIAR	19	1	2078.21	P23116	P23116	322	340	Eif3a	Eukaryotic translation initiation factor 3 subunit A	yes	yes	3	8.9755e-05	82.007	14957000	14957000	0	14957000	0
ESDDPMAYIHFTAEGEVTFK	20	0	2286.02	P08113;F7C312	P08113	365	384	Hsp90b1	Endoplasmin	yes	no	3	2.3998e-08	81.967	33241000	33241000	0	33241000	0
FLDGIYVSEK	10	0	1169.6	A0A0G2JES3;A0A140T8T4;P51410	A0A0G2JES3	174	183	Rpl9	60S ribosomal protein L9	yes	no	2	0.010185	81.95	21777000	21777000	0	21777000	0
KHNLCGETEEER	12	1	1500.66	P15626;D3YX76;D3YVP6;Q80W21;E9QAC8;D3YVP5;D3YZ29;D3YVP9;G5E8M7;O35660	P15626	83	94	Gstm2;Gstm7;Gstm6	Glutathione S-transferase Mu 2;Glutathione S-transferase Mu 7;Glutathione S-transferase Mu 6	no	no	3	1.1928e-07	81.92	2288900	2288900	0	2288900	0
LIHPDEDISLEER	13	0	1564.77	M0QWF0;Q9JMD0	M0QWF0	227	239	Zfp207;Znf207	BUB3-interacting and GLEBS motif-containing protein ZNF207	yes	no	2	0.0030543	81.865	13187000	13187000	0	13187000	0
VIDPATATSVDLR	13	0	1356.72	G5E839;P80315	G5E839	164	176	Cct4	T-complex protein 1 subunit delta	yes	no	2	0.0059038	81.865	7366700	7366700	0	7366700	0
SIYGERFPDENFK	13	1	1600.75	P24369	P24369	117	129	Ppib	Peptidyl-prolyl cis-trans isomerase B	yes	yes	2	0.0099099	81.625	14546000	14546000	0	14546000	0
AIIIFVPVPQLK	12	0	1336.85	P62082	P62082	59	70	Rps7	40S ribosomal protein S7	yes	yes	2	0.008765	81.594	31919000	31919000	0	31919000	0
LLALSGPGGGR	11	0	996.572	Q3TUQ5;O35691	Q3TUQ5	44	54	Pnn	Pinin	yes	no	2	0.0018103	81.548	2134900	2134900	0	2134900	0
AHATTSNTVSK	11	0	1115.56	O54724	O54724	101	111	Ptrf	Polymerase I and transcript release factor	yes	yes	2	0.0018467	81.525	1746900	1746900	0	1746900	0
VYVGSIYYELGEDTIR	16	0	1875.93	Q3UEB3	Q3UEB3	136	151	Puf60	Poly(U)-binding-splicing factor PUF60	yes	yes	2	0.0013368	81.494	7185700	7185700	0	7185700	0
VVTDTDETELAR	12	0	1347.65	Q6ZWX6	Q6ZWX6	277	288	Eif2s1	Eukaryotic translation initiation factor 2 subunit 1	yes	yes	2	0.0025762	81.338	94864000	94864000	0	94864000	0
LFNLSKEDDVR	11	1	1334.68	P62754	P62754	144	154	Rps6	40S ribosomal protein S6	yes	yes	2	1.0462e-17	81.338	0	0	0	0	0
GIVEFASKPAAR	12	1	1244.69	Q8VIJ6	Q8VIJ6	406	417	Sfpq	Splicing factor, proline- and glutamine-rich	yes	yes	2	0.0092798	80.688	7546800	7546800	0	7546800	0
TLGDFIK	7	0	792.438	A0A1L1SQX6;A0A1L1SV46;Q8BM13	A0A1L1SQX6	249	255	Olfm2	Noelin-2	yes	no	1	0.020978	80.555	11907000	0	11907000	0	61178000
AIGNIELGIR	10	0	1054.61	P14873	P14873	55	64	Map1b	Microtubule-associated protein 1B;MAP1B heavy chain;MAP1 light chain LC1	yes	yes	2	0.010549	80.438	2293500	2293500	0	2293500	0
SGELLAK	7	0	716.407	D3Z036;O88543	D3Z036	31	37	Cops3	COP9 signalosome complex subunit 3	yes	no	1	0.018768	80.377	81045000	0	81045000	0	416420000
VVTIAPGLFATPLLTTLPEK	20	0	2080.22	Q99N15;A2AFQ2;O08756	Q99N15	193	212	Hsd17b10	3-hydroxyacyl-CoA dehydrogenase type-2	yes	no	2	2.0112e-41	80.3	0	0	0	0	0
ELSAVTFPDIIR	12	0	1359.74	A0A087WRI1;Q8CFQ1;Q99K94;Q8C3V4;A0A087WSP5;P42225	A0A087WRI1	56	67	Stat1	Signal transducer and activator of transcription;Signal transducer and activator of transcription 1	yes	no	2	0.0016009	80.231	11333000	11333000	0	11333000	0
EITALAPSTMK	11	0	1160.61	P63260;P60710;E9Q1F2;P63268;P68134;P68033;P62737;B1ATY1;F8WGM8	P63260	316	326	Actg1;Actb;Actg2;Acta1;Actc1;Acta2	Actin, cytoplasmic 2;Actin, cytoplasmic 2, N-terminally processed;Actin, cytoplasmic 1;Actin, cytoplasmic 1, N-terminally processed;Actin, gamma-enteric smooth muscle;Actin, alpha skeletal muscle;Actin, alpha cardiac muscle 1;Actin, aortic smooth muscle	yes	no	2	0.007724	79.986	29586000	29586000	0	29586000	0
ATIATMPVPETR	12	0	1285.67	D6RI83;D3Z0S6;Q62189	D6RI83	2	13	Snrpa	U1 small nuclear ribonucleoprotein A	yes	no	2	0.0013428	79.974	18744000	18744000	0	18744000	0
SEITLVTPKPEK	12	1	1340.76	Q9QXK3	Q9QXK3	591	602	Copg2	Coatomer subunit gamma-2	yes	yes	2	0.0099404	79.974	4718500	4718500	0	4718500	0
VLSIGDGIAR	10	0	999.571	Q03265;D3Z6F5	Q03265	74	83	Atp5a1	ATP synthase subunit alpha, mitochondrial;ATP synthase subunit alpha	yes	no	2	0.018912	79.906	11709000	11709000	0	11709000	0
VYTLSVSGDR	10	0	1095.56	A0A140LHA2;Q9WVA3	A0A140LHA2	140	149	Bub3	Mitotic checkpoint protein BUB3	yes	no	2	0.010755	79.906	3021700	3021700	0	3021700	0
LLEVEHPAAK	10	0	1105.61	P11983;A0A3B2WDE2;F2Z483	P11983	64	73	Tcp1	T-complex protein 1 subunit alpha	yes	no	2	0.010755	79.906	2200200	2200200	0	2200200	0
FGYVDFESAEDLEK	14	0	1647.73	P09405	P09405	351	364	Ncl	Nucleolin	yes	yes	2	0.0019134	79.82	53613000	53613000	0	53613000	0
LLLEYTDTSYEDK	13	0	1588.75	P15626	P15626	19	31	Gstm2	Glutathione S-transferase Mu 2	yes	yes	2	0.0020815	79.741	32423000	32423000	0	32423000	0
MLLEYTDSSYDEK	13	0	1592.69	A2AE89;P10649	A2AE89	19	31	Gstm1	Glutathione S-transferase Mu 1	yes	no	2	0.0020598	79.693	99411000	99411000	0	99411000	0
VETGVLKPGMVVTFAPVNVTTEVK	24	1	2514.38	P10126	P10126	267	290	Eef1a1	Elongation factor 1-alpha 1	yes	yes	2;3;4	3.5158e-09	79.652	176720000	176720000	0	176720000	0
DIVPGDIVEIAVGDKVPADIR	21	1	2190.19	O55143	O55143	144	164	Atp2a2	Sarcoplasmic/endoplasmic reticulum calcium ATPase 2	yes	yes	3	4.5369e-08	79.568	9065000	9065000	0	9065000	0
YLDLILNDFVR	11	0	1379.74	Q8R2P8;Q99MN1	Q8R2P8	258	268	Kars	Lysine--tRNA ligase	yes	no	2	0.016169	79.148	10470000	10470000	0	10470000	0
SHEGETAYIR	10	0	1161.54	H7BX95;Q6PDM2	H7BX95	182	191	Srsf1	Serine/arginine-rich splicing factor 1	yes	no	3	0.0008848	79.148	8210300	8210300	0	8210300	0
KFGYVDFESAEDLEK	15	1	1775.83	P09405	P09405	350	364	Ncl	Nucleolin	yes	yes	2;3	0.00046466	78.932	47807000	47807000	0	47807000	0
DKPLKDVIIVDSGK	14	2	1525.87	P24369	P24369	191	204	Ppib	Peptidyl-prolyl cis-trans isomerase B	yes	yes	2	0.008736	78.903	46975000	46975000	0	46975000	0
LSSFIGAIAIGDLVK	15	0	1502.87	P80314;A0A1W2P6Q3;A0A1W2P7B7	P80314	26	40	Cct2	T-complex protein 1 subunit beta	yes	no	2	0.021021	78.763	40005000	40005000	0	40005000	0
AKEALELTDTGLLSGSEER	19	1	2018.02	Q9JHU4	Q9JHU4	1298	1316	Dync1h1	Cytoplasmic dynein 1 heavy chain 1	yes	yes	2	4.5815e-33	78.763	0	0	0	0	0
APGFGFGIAISGGR	14	0	1305.68	A0A0U1RPW2;B9EHJ3;P39447;A0A0U1RPB2	A0A0U1RPW2	29	42	Tjp1	Tight junction protein ZO-1	yes	no	2	0.0012107	78.692	13238000	13238000	0	13238000	0
HGRPGIGATHSSR	13	1	1331.68	D3YTQ9;P62843	D3YTQ9	101	113	Rps15	40S ribosomal protein S15	yes	no	2;4	0.016048	78.655	23114000	23114000	0	23114000	0
GLCGAIHSSVAK	12	0	1198.61	Q8C2Q8;Q91VR2;A2AKV0;A2AKV1;A2AKV2;A2AKV3;A2AKU9	Q8C2Q8	77	88	Atp5c1	ATP synthase subunit gamma;ATP synthase subunit gamma, mitochondrial	yes	no	2	0.0033124	78.655	7698400	7698400	0	7698400	0
DAALATALGDKK	12	1	1172.64	P14733	P14733	147	158	Lmnb1	Lamin-B1	yes	yes	2	0.017822	78.655	3108500	3108500	0	3108500	0
TLTLLGSPADISAATEK	17	0	1686.9	Q3UIR3	Q3UIR3	345	361	Dtx3l	E3 ubiquitin-protein ligase DTX3L	yes	yes	2	0.0043648	78.653	10227000	10227000	0	10227000	0
LIVENLSSR	9	0	1029.58	Q9D8S5;O35326;Q3TWW8;Q542V3;Q8VE97	Q3TWW8	112	120	Srsf5;Srsf6;Srsf4	Serine/arginine-rich splicing factor 5;Serine/arginine-rich splicing factor 6;Serine/arginine-rich splicing factor 4	no	no	2	0.016349	78.516	10141000	10141000	0	10141000	0
TVTLGGDVFDPHGTLSGGAR	20	0	1955.97	Q8CG48	Q8CG48	649	668	Smc2	Structural maintenance of chromosomes protein 2	yes	yes	2;3	1.6083e-08	78.486	37717000	37717000	0	37717000	0
EIVDAAEDYAKER	13	1	1507.72	Q8BJY7;Q922B2	Q8BJY7	16	28	Dars	Aspartate--tRNA ligase, cytoplasmic	yes	no	2;3	0.0074989	78.486	9969700	9969700	0	9969700	0
GFCFITFKEEEPVKK	15	2	1857.93	F6ZV59;G5E8G0;G3X9W0;Q60668;F6SHF3	F6ZV59	134	148	Hnrnpd	Heterogeneous nuclear ribonucleoprotein D0	yes	no	3	0.0065126	78.373	15057000	15057000	0	15057000	0
TSGPPVSELITK	12	0	1227.67	P43274	P43274	35	46	Hist1h1e	Histone H1.4	yes	yes	2	0.0033985	78.342	44752000	44752000	0	44752000	0
VHIEIGPDGR	10	0	1091.57	Q8C2Q7;O35737;Q9Z2X1;P70333	Q8C2Q7	317	326	Hnrnph1;Hnrnpf;Hnrnph2	Heterogeneous nuclear ribonucleoprotein H;Heterogeneous nuclear ribonucleoprotein H, N-terminally processed;Heterogeneous nuclear ribonucleoprotein F;Heterogeneous nuclear ribonucleoprotein F, N-terminally processed;Heterogeneous nuclear ribonucleoprotein H2	yes	no	2	0.011362	78.334	5060400	5060400	0	5060400	0
SFDFEIETK	9	0	1114.52	A2AW05;Q08943	A2AW05	388	396	Ssrp1	FACT complex subunit SSRP1	yes	no	2	0.016904	78.334	3181900	3181900	0	3181900	0
TLEEILLER	9	0	1114.62	A0A0A6YXI9;Q6NZF1	A0A0A6YXI9	160	168	Zc3h11a	Zinc finger CCCH domain-containing protein 11A	yes	no	2	0.016904	78.334	2100200	2100200	0	2100200	0
LGTEEISPR	9	0	1000.52	Q9WTI7	Q9WTI7	901	909	Myo1c	Unconventional myosin-Ic	yes	yes	2	0.016904	78.334	1936000	1936000	0	1936000	0
FLDFIGHIL	9	0	1073.59	O70172	O70172	397	405	Pip4k2a	Phosphatidylinositol 5-phosphate 4-kinase type-2 alpha	yes	yes	2	0.015431	77.748	20819000	20819000	0	20819000	0
VFLENVIR	8	0	988.571	P62806	P62806	61	68	Hist1h4a	Histone H4	yes	yes	2	0.020106	77.674	4780800	4780800	0	4780800	0
SHGVLGLYR	9	0	1000.55	Q8JZU2	Q8JZU2	77	85	Slc25a1	Tricarboxylate transport protein, mitochondrial	yes	yes	2	0.015244	77.674	1995100	1995100	0	1995100	0
FATEAAITILR	11	0	1204.68	P11983	P11983	516	526	Tcp1	T-complex protein 1 subunit alpha	yes	yes	2	0.0080241	77.662	6815600	6815600	0	6815600	0
CLDAFPNLRDFLAR	14	1	1706.86	A2AE89;P10649;F6WHQ7	A2AE89	200	213	Gstm1	Glutathione S-transferase Mu 1	no	no	3	0.00084219	77.527	15037000	15037000	0	15037000	0
AEVLAAR	7	0	728.418	Q9QZ82;A0A087WRU6	Q9QZ82	350	356	Cyp11a1	Cholesterol side-chain cleavage enzyme, mitochondrial	yes	no	2	0.022347	77.496	5478300	5478300	0	5478300	0
NAFACFDEEASGFIHEDHLR	20	0	2364.02	Q9CQ19	Q9CQ19	105	124	Myl9	Myosin regulatory light polypeptide 9	yes	yes	3	1.4886e-08	77.39	4486200	4486200	0	4486200	0
LEDVLPLAFTR	11	0	1272.71	A2AM65;Z4YKA3;Z4YKB8;Q3TEA8	A2AM65	95	105	Hp1bp3	Heterochromatin protein 1-binding protein 3	yes	no	2	0.0080761	77.379	11484000	11484000	0	11484000	0
GIVKDIIHDPGR	12	1	1318.74	P62918	P62918	43	54	Rpl8	60S ribosomal protein L8	yes	yes	2	1.0524e-05	77.379	10135000	10135000	0	10135000	0
LLLSGTADGADLR	13	0	1300.7	A0A1W2P6X1;E9QKG6;A0A0G2JDZ9;E9Q804;Q99NH0	A0A1W2P6X1	149	161	Ankrd17	Ankyrin repeat domain-containing protein 17	yes	no	2	4.4021e-14	77.379	0	0	0	0	0
AAEVGDDFLGDFVVGER	17	0	1794.84	Q9Z0H8	Q9Z0H8	69	85	Clip2	CAP-Gly domain-containing linker protein 2	yes	yes	2	0.0075702	77.185	2945900	2945900	0	2945900	0
LASSLTTK	8	0	819.47	Q9DB77	Q9DB77	85	92	Uqcrc2	Cytochrome b-c1 complex subunit 2, mitochondrial	yes	yes	2	0.019346	77.058	3474200	3474200	0	3474200	0
LLAAEAEELKPLFMK	15	1	1701.94	A0A087WSJ5;A0A087WNN8;Q61263	A0A087WSJ5	10	24	Soat1	Sterol O-acyltransferase 1	yes	no	2;3	0.0021876	76.927	46578000	46578000	0	46578000	0
VILHLKEDQTEYLEERR	17	2	2170.14	P11499;P07901	P11499	181	197	Hsp90ab1;Hsp90aa1	Heat shock protein HSP 90-beta;Heat shock protein HSP 90-alpha	no	no	4	4.6881e-06	76.85	10040000	10040000	0	10040000	0
DIRPEYREDFVLTVTGK	17	2	2037.05	B1AUB6;B1AUB8;B1AUB9;B1AUC0;Q02780	B1AUB6	74	90	Nfia	Nuclear factor 1;Nuclear factor 1 A-type	yes	no	3	0.0032694	76.85	8948200	8948200	0	8948200	0
AIDLFTDAIK	10	0	1105.6	E9Q1V0;F8WJK8;Q99L47	E9Q1V0	95	104	St13	Hsc70-interacting protein	yes	no	2	0.011283	76.827	20692000	20692000	0	20692000	0
GYSFTTTAER	10	0	1131.52	P63260;P60710;E9Q5F4;E9Q1F2;G3UZ07	P63260	197	206	Actg1;Actb	Actin, cytoplasmic 2;Actin, cytoplasmic 2, N-terminally processed;Actin, cytoplasmic 1;Actin, cytoplasmic 1, N-terminally processed	yes	no	2	0.011283	76.827	3966500	3966500	0	3966500	0
SISESAFSAR	10	0	1053.51	P51655	P51655	355	364	Gpc4	Glypican-4;Secreted glypican-4	yes	yes	2	0.011283	76.827	927380	927380	0	927380	0
IVVNLTGR	8	0	870.529	D3YVB4;D3Z712;F8WJ41;P62245	D3YVB4	61	68	Rps15a	40S ribosomal protein S15a	yes	no	2	0.020225	76.774	7106700	7106700	0	7106700	0
AIEPPPLDAVIEAEHTLR	18	0	1970.05	A0A087WPL5;E9QNN1	A0A087WPL5	822	839	Dhx9		yes	no	3	6.05e-06	76.768	8653100	8653100	0	8653100	0
KYDAFLASESLIK	13	1	1483.79	A0A3B2WDD2;A0A3B2WBL1;Q5XJF6;P53026	A0A3B2WDD2	79	91	Rpl10a	Ribosomal protein;60S ribosomal protein L10a	yes	no	3	2.8487e-05	76.728	3546000	3546000	0	3546000	0
YLVLDCVPEER	11	0	1391.68	Q8CGF7	Q8CGF7	1059	1069	Tcerg1	Transcription elongation regulator 1	yes	yes	2	0.0080065	76.465	11005000	11005000	0	11005000	0
YLLLVLMDAER	11	0	1334.73	A2AAN2;Q8BMA6	A2AAN2	84	94	Srp68	Signal recognition particle subunit SRP68	yes	no	2	2.1495e-10	76.465	0	0	0	0	0
FVDHVFDEQVIDSLTVK	17	0	1990	Q91YQ5	Q91YQ5	356	372	Rpn1	Dolichyl-diphosphooligosaccharide--protein glycosyltransferase subunit 1	yes	yes	2	5.3217e-05	76.357	5870700	5870700	0	5870700	0
ELAEDGYSGVEVR	13	0	1422.66	A0A140LI77;D3YV43;P62908	A0A140LI77	28	40	Rps3	40S ribosomal protein S3	yes	no	2	0.0014918	76.143	82232000	82232000	0	82232000	0
DLLLFLAER	9	0	1088.62	Q9JIG7	Q9JIG7	99	107	Ccdc22	Coiled-coil domain-containing protein 22	yes	yes	2	0.013553	75.854	202300000	0	202300000	0	1039400000
TEILPPFFK	9	0	1090.61	G5E866;Q99NB9	G5E866	808	816	Sf3b1	Splicing factor 3B subunit 1	yes	no	2	0.014121	75.854	4473000	4473000	0	4473000	0
FGFPEGSVELYAEK	14	0	1571.75	A0A140LI77;D3YV43;P62908	A0A140LI77	77	90	Rps3	40S ribosomal protein S3	yes	no	2	0.00064338	75.819	63189000	63189000	0	63189000	0
NPPGFAFVEFEDPRDAADAVRELDGR	26	2	2889.37	P84104	P84104	44	69	Srsf3	Serine/arginine-rich splicing factor 3	yes	yes	3;4	3.8887e-14	75.71	61876000	61876000	0	61876000	0
IEEVLSGVLDTELR	14	0	1571.84	H9KV01;H9KV15;H9KV00;Q9QX47;H9KV02	H9KV01	65	78	Son	Protein SON	yes	no	2	2.0801e-14	75.695	0	0	0	0	0
LLTTIGKDLDFAK	13	1	1433.81	A0A0J9YVC1;A0A0J9YUC1;E9Q770;A0A0J9YUS5;E9PVC6;E9Q9E1;E9PVC5;Q6NZJ6	A0A0J9YVC1	771	783	Eif4g1	Eukaryotic translation initiation factor 4 gamma 1	yes	no	2	0.0087226	75.509	8082500	8082500	0	8082500	0
SVSLYYTGEK	10	0	1145.56	P09405	P09405	460	469	Ncl	Nucleolin	yes	yes	2	0.010265	75.378	61179000	61179000	0	61179000	0
LAALSASLAR	10	0	971.576	Q5SQ20;Q9EQ61	Q5SQ20	280	289	Pes1	Pescadillo homolog	yes	no	2	0.010265	75.378	1495600	1495600	0	1495600	0
KLYGDTDYLEER	12	1	1500.71	P70698	P70698	466	477	Ctps1	CTP synthase 1	yes	yes	2	0.021791	75.294	13476000	13476000	0	13476000	0
YESLTDPSKLDSGKELK	17	2	1908.97	P11499;E9PX27;D3Z1R1	P11499	56	72	Hsp90ab1	Heat shock protein HSP 90-beta	yes	no	3	1.9439e-05	75.239	22363000	22363000	0	22363000	0
EFEVYGPIKR	10	1	1236.65	Q62376;A0A1B0GRR8;A0A1B0GR44	Q62376	122	131	Snrnp70	U1 small nuclear ribonucleoprotein 70 kDa	yes	no	2	0.0002045	75.213	36334000	36334000	0	36334000	0
ITQSNAILR	9	0	1014.58	A2AE89;P10649;F6WHQ7;A2AE91;E9PV63;P15626;D3YX76;D3YVP6;Q80W21;E9QAC8;D3YVP5;Q8R5I6;D3YZ29;E9PVM7;P48774	A2AE89	70	78	Gstm1;Gstm4;Gstm5;Gstm2;Gstm7	Glutathione S-transferase Mu 1;Glutathione S-transferase Mu 2;Glutathione S-transferase Mu 7;Glutathione S-transferase Mu 5	no	no	2	0.01391	75.213	9698400	9698400	0	9698400	0
FVDLYGAQK	9	0	1039.53	Q8BMS1	Q8BMS1	720	728	Hadha	Trifunctional enzyme subunit alpha, mitochondrial;Long-chain enoyl-CoA hydratase;Long chain 3-hydroxyacyl-CoA dehydrogenase	yes	yes	2	0.01391	75.213	1948400	1948400	0	1948400	0
GFAFISFHR	9	0	1080.55	Q9Z1D1	Q9Z1D1	281	289	Eif3g	Eukaryotic translation initiation factor 3 subunit G	yes	yes	2	0.01391	75.213	1825600	1825600	0	1825600	0
EGDVLTLLESER	12	0	1359.69	G3UYV7;P62858	G3UYV7	39	50	Rps28	40S ribosomal protein S28	yes	no	2	6.2423e-11	74.944	0	0	0	0	0
DKVEASSLPEAR	12	1	1300.66	Q05CL8	Q05CL8	275	286	Larp7	La-related protein 7	yes	yes	2	3.1865e-11	74.841	0	0	0	0	0
KAEAGAGSATEFQFR	15	1	1568.76	P63325	P63325	139	153	Rps10	40S ribosomal protein S10	yes	yes	3	1.534e-05	74.789	1810800	1810800	0	1810800	0
ERPAPAVSSTCATAEDSSVLYSR	23	1	2453.15	Q8CGC7	Q8CGC7	734	756	Eprs	Bifunctional glutamate/proline--tRNA ligase;Glutamate--tRNA ligase;Proline--tRNA ligase	yes	yes	3	6.2842e-10	74.579	9318200	9318200	0	9318200	0
FGGGSVELLK	10	0	1005.55	Q8BMS1	Q8BMS1	611	620	Hadha	Trifunctional enzyme subunit alpha, mitochondrial;Long-chain enoyl-CoA hydratase;Long chain 3-hydroxyacyl-CoA dehydrogenase	yes	yes	2	0.00041077	74.464	36000000	36000000	0	36000000	0
LYSVSYLLK	9	0	1084.62	B7FAV1;B7FAU9;Q8BTM8	B7FAV1	2549	2557	Flna	Filamin-A	yes	no	2	0.013611	74.301	8643000	8643000	0	8643000	0
SGDAAIVDMVPGKPMCVESFSDYPPLGR	28	1	2994.39	P10126	P10126	396	423	Eef1a1	Elongation factor 1-alpha 1	yes	yes	3	8.2156e-17	74.274	14855000	14855000	0	14855000	0
ITAEEMYDIFGK	12	0	1415.66	A0A1W2P7L7;P59708	A0A1W2P7L7	20	31	Sf3b6	Splicing factor 3B subunit 6	yes	no	2	0.0042628	74.162	19636000	19636000	0	19636000	0
IVESDVGDSFYIR	13	0	1498.73	A0A0U1RPW2;B9EHJ3;P39447	A0A0U1RPW2	510	522	Tjp1	Tight junction protein ZO-1	yes	no	2	0.0022018	74.162	11228000	11228000	0	11228000	0
IAVEPVNPSELPK	13	0	1391.77	G3UZ34;A2AH85;O08810	G3UZ34	580	592	Eftud2	116 kDa U5 small nuclear ribonucleoprotein component	yes	no	2	0.01377	74.162	9079100	9079100	0	9079100	0
FYLLVVVGETVTEEHLR	17	0	2003.07	P14873	P14873	37	53	Map1b	Microtubule-associated protein 1B;MAP1B heavy chain;MAP1 light chain LC1	yes	yes	3	7.9852e-06	74.141	17204000	17204000	0	17204000	0
IGGSVLQTHK	10	0	1038.58	Q8BIZ0	Q8BIZ0	387	396	Pcdh20	Protocadherin-20	yes	yes	2	0.0093863	74.127	17723000	17723000	0	17723000	0
LADFGVLHR	9	0	1026.56	Q9D0R2	Q9D0R2	433	441	Tars	Threonine--tRNA ligase, cytoplasmic	yes	yes	2	0.013553	74.127	2155400	2155400	0	2155400	0
TDASSASSFLDSDELERTGIDLGTTGR	27	1	2800.3	F7AA45;E9Q8F0;Q8VH51	F7AA45	170	196	Rbm39	RNA-binding protein 39	yes	no	3	1.2669e-14	74.074	6289900	6289900	0	6289900	0
LGVLHPDVITK	11	0	1190.7	Q9WUA2	Q9WUA2	561	571	Farsb	Phenylalanine--tRNA ligase beta subunit	yes	yes	2	0.021026	73.985	2254000	2254000	0	2254000	0
CLEEFELLGK	10	0	1236.61	Q8R1B4;M0QWV3	Q8R1B4	79	88	Eif3c;G730046D07Rik	Eukaryotic translation initiation factor 3 subunit C	yes	no	2	0.0092483	73.931	16700000	16700000	0	16700000	0
TLKDSERETIQMQEK	15	2	1834.91	A0A494BAF9;Q8BI79	A0A494BAF9	991	1005	Ccdc40	Coiled-coil domain-containing protein 40	yes	no	2	1.0006e-06	73.885	4932300000	3818500000	981030000	3818500000	5040600000
SIEIPRPVDGVEVPGCGK	18	1	1907.98	Q80XR5;P26369;Q3KQM4	Q80XR5	410	427	U2af2	Splicing factor U2AF 65 kDa subunit	yes	no	2;3	0.015538	73.848	33668000	33668000	0	33668000	0
GLLSSLDHTSIRR	13	1	1453.8	Q9D0M3;A0A2R8VHK1	Q9D0M3	100	112	Cyc1	Cytochrome c1, heme protein, mitochondrial	yes	no	3;4	0.0004254	73.848	14847000	14847000	0	14847000	0
GFALVGVGSEASSK	14	0	1307.67	H3BJ30;H3BJW3;Q6NVF9	H3BJ30	125	138	Cpsf6	Cleavage and polyadenylation specificity factor subunit 6	yes	no	2	0.00091609	73.781	26722000	26722000	0	26722000	0
ALEEALEAKEEFER	14	1	1662.81	Q5SV64;Q3UH59;Q61879	Q5SV64	1522	1535	Myh10	Myosin-10	yes	no	2	0.0016339	73.781	7925800	7925800	0	7925800	0
ALKGPAPAHGHH	12	1	1191.63	P56379	P56379	47	58	Mp68	6.8 kDa mitochondrial proteolipid	yes	yes	2;3	0.007133	73.616	25916000	0	0	0	0
LKAEHDSILAEK	12	1	1352.73	Q9D0R2;A0A2I3BPK8	Q9D0R2	63	74	Tars	Threonine--tRNA ligase, cytoplasmic	yes	no	3	0.010048	73.466	7628000	7628000	0	7628000	0
VVDLLAPYAK	10	0	1087.63	P56480	P56480	189	198	Atp5b	ATP synthase subunit beta, mitochondrial	yes	yes	2	0.0087768	73.26	4748300	4748300	0	4748300	0
IDLAVLLGK	9	0	940.596	A0A0H2UH17;A0A0G2JDV6;Q80X50	A0A0H2UH17	282	290	Ubap2l	Ubiquitin-associated protein 2-like	yes	no	2	0.013264	73.248	2684600	2684600	0	2684600	0
SAPDFTATAVVDGAFKEIK	19	1	1966	D3Z4A4;Q61171	D3Z4A4	11	29	Prdx2	Peroxiredoxin-2	yes	no	2	1.7942e-07	73.156	4481200	4481200	0	4481200	0
DGSLIVSSSYDGLCR	15	0	1627.75	F6Q3W0;P61965	F6Q3W0	113	127	Wdr5	WD repeat-containing protein 5	yes	no	2	0.0011052	73.067	2760600	2760600	0	2760600	0
LFDSTTLEHQK	11	0	1317.66	Q9QZD9	Q9QZD9	214	224	Eif3i	Eukaryotic translation initiation factor 3 subunit I	yes	yes	2	0.019938	72.928	5583700	5583700	0	5583700	0
GTVVTGTLER	10	0	1031.56	Q8BFR5;A0A0U1RNQ6	Q8BFR5	272	281	Tufm	Elongation factor Tu, mitochondrial	yes	no	2	0.0090037	72.928	4113100	4113100	0	4113100	0
TIEKFEKEAAEMGK	14	2	1609.8	P10126;D3YZ68;D3Z3I8;P62631	P10126	38	51	Eef1a1;Eef1a2	Elongation factor 1-alpha 1;Elongation factor 1-alpha 2	no	no	3;4	0.00076184	72.891	35463000	35463000	0	35463000	0
VASPVKRPK	9	2	980.613	J3QNW0;P13864	J3QNW0	837	845	Dnmt1	DNA (cytosine-5)-methyltransferase;DNA (cytosine-5)-methyltransferase 1	yes	no	2	0.0092975	72.789	1728400	0	1728400	0	8880900
LISEILSESVVPDVR	15	0	1654.91	O54941	O54941	202	216	Smarce1	SWI/SNF-related matrix-associated actin-dependent regulator of chromatin subfamily E member 1	yes	yes	2	0.01012	72.652	14118000	14118000	0	14118000	0
HALIIYDDLSK	11	0	1286.69	Q03265;D3Z6F5	Q03265	306	316	Atp5a1	ATP synthase subunit alpha, mitochondrial;ATP synthase subunit alpha	yes	no	2	0.0068688	72.643	17121000	17121000	0	17121000	0
GLGLDESGLAK	11	0	1058.56	P60122	P60122	23	33	Ruvbl1	RuvB-like 1	yes	yes	2	0.0068688	72.643	9650700	9650700	0	9650700	0
AFKDTGKTPVEPEVAIHR	18	2	1994.06	P60867	P60867	2	19	Rps20	40S ribosomal protein S20	yes	yes	4	3.6848e-07	72.583	10642000	10642000	0	10642000	0
LLLPGELAK	9	0	952.596	Q8CBB6;Q8CGP2;Q8CGP1;Q6ZWY9;Q64525;Q64478;Q64475;P10854;P10853;Q9D2U9;Q8CGP0;Q64524;P70696	Q8CBB6	101	109	Hist1h2br;Hist1h2bp;Hist1h2bk;Hist1h2bc;Hist2h2bb;Hist1h2bh;Hist1h2bb;Hist1h2bm;Hist1h2bf;Hist3h2ba;Hist3h2bb;Hist2h2be;Hist1h2ba	Histone H2B;Histone H2B type 1-P;Histone H2B type 1-K;Histone H2B type 1-C/E/G;Histone H2B type 2-B;Histone H2B type 1-H;Histone H2B type 1-B;Histone H2B type 1-M;Histone H2B type 1-F/J/L;Histone H2B type 3-A;Histone H2B type 3-B;Histone H2B type 2-E;Histone H2B type 1-A	yes	no	2	0.016349	72.485	270190000	270190000	0	270190000	0
AVVGVVAGGGR	11	0	940.545	P62918	P62918	164	174	Rpl8	60S ribosomal protein L8	yes	yes	2	0.0069427	72.485	17646000	17646000	0	17646000	0
KSDIDEIVLVGGSTR	15	1	1587.85	P20029	P20029	354	368	Hspa5	78 kDa glucose-regulated protein	yes	yes	2	0.00070982	72.265	3701100	3701100	0	3701100	0
EILETLIK	8	0	957.575	P47856;D3YYE0;D3YYD9	P47856	18	25	Gfpt1	Glutamine--fructose-6-phosphate aminotransferase [isomerizing] 1	yes	no	1	0.017446	72.234	2028300	2028300	0	2028300	0
ISAVAVAER	9	0	914.519	A0A087WPL5;E9QNN1;Q3UR42;O70133	A0A087WPL5	450	458	Dhx9	ATP-dependent RNA helicase A	yes	no	2	3.031e-05	72.23	0	0	0	0	0
LMELHGEGGSSGK	13	0	1300.61	P97351	P97351	228	240	Rps3a	40S ribosomal protein S3a	yes	yes	2	0.0032702	72.2	14511000	14511000	0	14511000	0
LTENLSALR	9	0	1015.57	D3Z390;Q921C5	D3Z390	318	326	Bicd2	Protein bicaudal D homolog 2	yes	no	2	0.0029133	72.138	40095000	0	40095000	0	206010000
IIASSPDMDLPTVSALR	17	0	1784.93	Q922Q4	Q922Q4	30	46	Pycr2	Pyrroline-5-carboxylate reductase 2	yes	yes	2	4.7009e-05	72.006	998610000	0	998610000	0	5130900000
INVYYNEATGGK	12	0	1327.64	P68372	P68372	47	58	Tubb4b	Tubulin beta-4B chain	yes	yes	2	0.0052804	72.006	6666300	6666300	0	6666300	0
HGYIGEFEIIDDHR	14	0	1699.8	D3YVB4;D3Z712;F8WJ41;P62245	D3YVB4	44	57	Rps15a	40S ribosomal protein S15a	yes	no	2	0.0016316	71.889	13061000	13061000	0	13061000	0
DQVANSAFVER	11	0	1234.59	P07901	P07901	501	511	Hsp90aa1	Heat shock protein HSP 90-alpha	yes	yes	2	0.0073493	71.614	7385900	7385900	0	7385900	0
FVPREEGPYEVEVTYDGVPVPGSPFPLEAVAPTKPSK	37	2	3984.02	B7FAV1;B7FAU9;Q8BTM8	B7FAV1	1009	1045	Flna	Filamin-A	yes	no	4	1.0011e-27	71.359	28180000	28180000	0	28180000	0
VYSLFLDESR	10	0	1227.61	Q9WTM5	Q9WTM5	429	438	Ruvbl2	RuvB-like 2	yes	yes	2	0.012881	71.349	11526000	11526000	0	11526000	0
LLATEQEDAAVAK	13	0	1357.71	A2AVJ7;Q99PL5	A2AVJ7	770	782	Rrbp1	Ribosome-binding protein 1	yes	no	2	0.020361	71.349	6058700	6058700	0	6058700	0
ELELKVPLVVR	11	1	1293.8	Q9Z2I8	Q9Z2I8	383	393	Suclg2	Succinyl-CoA ligase [GDP-forming] subunit beta, mitochondrial	yes	yes	2	1.7884e-05	71.223	1196700	1196700	0	1196700	0
AATFGLILDDVSLTHLTFGK	20	0	2118.14	Q5SQG5;P67778	Q5SQG5	158	177	Phb	Prohibitin	yes	no	3	3.3572e-08	71.073	16867000	16867000	0	16867000	0
IFHTVTTTDDPVIR	14	0	1613.84	O70194	O70194	223	236	Eif3d	Eukaryotic translation initiation factor 3 subunit D	yes	yes	2	0.0021095	70.977	19799000	19799000	0	19799000	0
TIKAELDAAEKLR	13	2	1456.82	Q8CBM2;A2AL85;Q8BSY0	Q8CBM2	240	252	Asph	Aspartyl/asparaginyl beta-hydroxylase	yes	no	2	0.012254	70.977	3682400	3682400	0	3682400	0
DIEEIIDELKAGK	13	1	1471.78	Q9D6J6	Q9D6J6	199	211	Ndufv2	NADH dehydrogenase [ubiquinone] flavoprotein 2, mitochondrial	yes	yes	2	0.014218	70.977	3542600	3542600	0	3542600	0
LLGSFEVFITDAR	13	0	1466.78	Q8BVY0	Q8BVY0	147	159	Rsl1d1	Ribosomal L1 domain-containing protein 1	yes	yes	2	5.8933e-08	70.977	0	0	0	0	0
YLYTLVITDKEKAEK	15	2	1812.99	Q9JJI8	Q9JJI8	41	55	Rpl38	60S ribosomal protein L38	yes	yes	3;4	0.00013184	70.529	48305000	48305000	0	48305000	0
STPVTVVLPDTK	12	0	1255.7	G3UZ34;A2AH85;O08810	G3UZ34	173	184	Eftud2	116 kDa U5 small nuclear ribonucleoprotein component	yes	no	2	0.0064936	70.412	12874000	12874000	0	12874000	0
FAISELFAKNDLAVVDVR	18	1	2006.08	P09405	P09405	327	344	Ncl	Nucleolin	yes	yes	3	4.058e-05	70.335	8542500	8542500	0	8542500	0
VIIVVKDGPGFYTTR	15	1	1663.93	Q8BMS1	Q8BMS1	535	549	Hadha	Trifunctional enzyme subunit alpha, mitochondrial;Long-chain enoyl-CoA hydratase;Long chain 3-hydroxyacyl-CoA dehydrogenase	yes	yes	2;3	0.0001505	70.281	11968000	11968000	0	11968000	0
TGVLAHLEEERDLK	14	1	1608.85	A0A2R8VHF9;E9QPE7;A0A338P6K2;O08638	A0A2R8VHF9	772	785	Myh11	Myosin-11	yes	no	3	0.0079608	70.281	5107600	5107600	0	5107600	0
GYAYVEFENPDEAEK	15	0	1759.76	Q99M28	Q99M28	204	218	Rnps1	RNA-binding protein with serine-rich domain 1	yes	yes	2	0.011	70.17	6270200	6270200	0	6270200	0
LGDPLEAFPVFK	12	0	1331.71	A0A494B9D7;Q8VE10	A0A494B9D7	35	46	Naa40	N-alpha-acetyltransferase 40	yes	no	2	0.0067308	70.1	8192100	8192100	0	8192100	0
TTYLVLDEADR	11	0	1294.64	S4R1I6;Q8BTS0;Q61656	S4R1I6	242	252	Ddx5	Probable ATP-dependent RNA helicase DDX5	yes	no	2	0.0080557	70.1	7656100	7656100	0	7656100	0
LTELGTVDPK	10	0	1071.58	Q9JKF1	Q9JKF1	1466	1475	Iqgap1	Ras GTPase-activating-like protein IQGAP1	yes	yes	2	0.016056	70.056	6405900	6405900	0	6405900	0
FGEVVDCTLK	10	0	1166.56	F6ZV59;G5E8G0;G3X9W0;Q60668;E9Q5B6	F6ZV59	30	39	Hnrnpd	Heterogeneous nuclear ribonucleoprotein D0	yes	no	2	0.016056	70.056	6016000	6016000	0	6016000	0
VIGMHYFSPVDK	12	0	1391.69	Q8BMS1	Q8BMS1	494	505	Hadha	Trifunctional enzyme subunit alpha, mitochondrial;Long-chain enoyl-CoA hydratase;Long chain 3-hydroxyacyl-CoA dehydrogenase	yes	yes	2	0.0067854	70.028	8650800	8650800	0	8650800	0
VLPPPAGYVPIR	12	0	1277.75	G5E866;Q99NB9	G5E866	414	425	Sf3b1	Splicing factor 3B subunit 1	yes	no	2	0.0068423	69.954	4911700	4911700	0	4911700	0
TIPGTALVEMGDEYAVER	18	0	1949.94	Q921F4	Q921F4	419	436	Hnrnpll	Heterogeneous nuclear ribonucleoprotein L-like	yes	yes	2	2.0017e-05	69.602	4471200	4471200	0	4471200	0
FEDGDLTLYQSNAILR	16	0	1853.92	A0A494BAS3;A0A494BAU3;A0A494BAM8;A0A494B908;A0A494BAW2;P46425;P19157	A0A494BAS3	39	54	Gstp2;Gstp1	Glutathione S-transferase P 2;Glutathione S-transferase P 1	yes	no	2	0.00062441	69.451	22801000	22801000	0	22801000	0
ASAELDIKDVSDER	14	1	1546.75	P14873	P14873	1232	1245	Map1b	Microtubule-associated protein 1B;MAP1B heavy chain;MAP1 light chain LC1	yes	yes	2	0.0098018	69.451	3614200	3614200	0	3614200	0
AGPALGEGER	10	0	955.472	Q99MR6;A0A0G2JDN3;A0A0G2JDF1	Q99MR6	291	300	Srrt	Serrate RNA effector molecule homolog	yes	no	2	0.01761	69.423	704280	704280	0	704280	0
IVLTNPVCTEVGEK	14	0	1557.81	Q9Z0N1;Q9Z0N2	Q9Z0N1	427	440	Eif2s3x;Eif2s3y	Eukaryotic translation initiation factor 2 subunit 3, X-linked;Eukaryotic translation initiation factor 2 subunit 3, Y-linked	yes	no	2	0.0029627	69.349	12468000	12468000	0	12468000	0
TYFPHFDVSHGSAQVK	16	0	1818.87	Q91VB8;P01942	Q91VB8	42	57	haemaglobin alpha 2;Hba	Hemoglobin subunit alpha	yes	no	3;4	0.001503	69.331	82941000	82941000	0	82941000	0
KGFEFTLMVVGESGLGK	17	1	1797.93	D3Z1S1;F6WYM0;D3YYB1;D3Z3C0;P42208;D3YV76;D3YZU7	D3Z1S1	64	80	Sept2	Septin-2	yes	no	3	2.3106e-05	69.188	7934400	7934400	0	7934400	0
LLLEYTDTSYEDKK	14	1	1716.85	P15626	P15626	19	32	Gstm2	Glutathione S-transferase Mu 2	yes	yes	3	0.0006262	69.108	41962000	41962000	0	41962000	0
VLLGETGKEKLPR	13	2	1438.85	A0A1B0GRR3;A0A1B0GSE8;P62281	A0A1B0GRR3	23	35	Rps11	40S ribosomal protein S11	yes	no	3	0.022152	69.03	7495700	7495700	0	7495700	0
AVIDAAETSSLRK	13	1	1359.74	Q5SU72;Q5SU71;Q61510	Q5SU72	249	261	Trim25	E3 ubiquitin/ISG15 ligase TRIM25	yes	no	3	2.1604e-07	69.03	2914000	2914000	0	2914000	0
HHEDEIDHHSKEIER	15	1	1909.87	E9PV44;O35143	E9PV44	41	55	Atpif1	ATPase inhibitor, mitochondrial	yes	no	4;5;6	0.00096618	68.972	16751000	16751000	0	16751000	0
YATALYSAASK	11	0	1144.58	F6XVM5;A0A338P776;Q9DB20	F6XVM5	38	48	Atp5o	ATP synthase subunit O, mitochondrial	yes	no	2	0.0086191	68.893	10630000	10630000	0	10630000	0
LYSEDELPAEFK	12	0	1439.68	Q8BTU1	Q8BTU1	171	182	Cfap20	Cilia- and flagella-associated protein 20	yes	yes	2	0.0076494	68.893	9286200	9286200	0	9286200	0
AVTLDKDAYYR	11	1	1313.66	G3X956;Q920B9	G3X956	2	12	Supt16;Supt16h	FACT complex subunit SPT16	yes	no	2	0.0026125	68.735	8549100	8549100	0	8549100	0
VTVLEGDILDAQCLR	15	0	1700.88	P24815	P24815	56	70	Hsd3b1	3 beta-hydroxysteroid dehydrogenase/Delta 5-->4-isomerase type 1;3-beta-hydroxy-Delta(5)-steroid dehydrogenase;Steroid Delta-isomerase	yes	yes	2	0.0018945	68.069	8136300	8136300	0	8136300	0
DPGVITYDLPTPPGEK	16	0	1697.85	G3UY93;Q9Z1Q9	G3UY93	273	288	Vars	Valine--tRNA ligase	yes	no	2	0.0010219	68.069	2992000	2992000	0	2992000	0
EIVEPELSIEVCEEK	15	0	1801.87	Z4YL78;A0A0R4J0K2;K3W4R5;A2AGT5	Z4YL78	581	595	Ckap5	Cytoskeleton-associated protein 5	yes	no	2	0.0018945	68.069	2480600	2480600	0	2480600	0
IGLFGGAGVGK	11	0	974.555	P56480	P56480	202	212	Atp5b	ATP synthase subunit beta, mitochondrial	yes	yes	2	0.010903	67.993	5590600	5590600	0	5590600	0
QTVAVGVIK	9	0	913.56	P10126;P62631	P10126	431	439	Eef1a1;Eef1a2	Elongation factor 1-alpha 1;Elongation factor 1-alpha 2	no	no	1	0.0164	67.981	17708000	17708000	0	17708000	0
GEHPGLSIGDVAK	13	0	1278.66	A0A0J9YUZ4;P63158;A0A0J9YUD8	A0A0J9YUZ4	129	141	Hmgb1	High mobility group protein B1	yes	no	2	0.0067521	67.726	27693000	27693000	0	27693000	0
NLSPGAVESDVR	12	0	1242.62	F8WHL2;Q8CIE6	F8WHL2	171	182	Copa	Coatomer subunit alpha;Coatomer subunit alpha;Xenin;Proxenin	yes	no	2	0.0092859	67.726	6017100	6017100	0	6017100	0
VLEQIEEVDGR	11	0	1285.65	J3QNW0;P13864	J3QNW0	795	805	Dnmt1	DNA (cytosine-5)-methyltransferase;DNA (cytosine-5)-methyltransferase 1	yes	no	2	0.012214	67.563	2642200	2642200	0	2642200	0
KYEFGESDLR	10	1	1242.59	Q9JHU4	Q9JHU4	4202	4211	Dync1h1	Cytoplasmic dynein 1 heavy chain 1	yes	yes	2	0.003742	67.563	0	0	0	0	0
YVAADTLYSQIK	12	0	1370.71	S4R1Y6;A0A1D5RLZ3;A0A087WSP0;E9Q9X1;S4R1P5;Q91ZU6	S4R1Y6	73	84	Dst	Dystonin	yes	no	2	0.0096381	67.494	849140000	0	849140000	0	4363000000
ELVAESLGIR	10	0	1085.61	Q8CJ53	Q8CJ53	88	97	Trip10	Cdc42-interacting protein 4	yes	yes	2	0.021441	67.494	1661100	1661100	0	1661100	0
ELLTTMGDRFTDEEVDELYR	20	1	2431.12	Q6ZWQ9;Q3THE2	Q6ZWQ9	125	144	Myl12a;Myl12b	Myosin regulatory light chain 12B	yes	no	3	2.4309e-06	67.43	25552000	25552000	0	25552000	0
EALFNEFVAAAR	12	0	1336.68	Q8CGF7;A0A494B9W7	Q8CGF7	772	783	Tcerg1	Transcription elongation regulator 1	yes	no	2	0.0098808	67.334	7019600	7019600	0	7019600	0
LKGEATVSFDDPPSAK	16	1	1660.83	G3UXT7;Q8CFQ9;P56959	G3UXT7	24	39	Fus	RNA-binding protein FUS	yes	no	2;3	0.0045891	67.275	56332000	56332000	0	56332000	0
HLDLSNVASYK	11	0	1245.64	A0A2R8W6S4;Q9WVE8	A0A2R8W6S4	81	91	Pacsin2	Protein kinase C and casein kinase substrate in neurons protein 2	yes	no	2	0.013301	67.207	4701900	4701900	0	4701900	0
SLVDTVYALKDEVK	14	1	1578.85	A2AFJ8;F6WMJ3;Q8K4I3	A2AFJ8	420	433	Arhgef6	Rho guanine nucleotide exchange factor 6	yes	no	2	0.015359	67.153	5902100	5902100	0	5902100	0
EVYENYPAYDLTER	14	0	1760.79	Q7TNV0	Q7TNV0	354	367	Dek	Protein DEK	yes	yes	2	0.0045588	67.153	3311500	3311500	0	3311500	0
EISEGDEVEVYSR	13	0	1510.68	A0A0G2JEP0;Q61584;A0A0G2JGL6	A0A0G2JEP0	58	70	Fxr1	Fragile X mental retardation syndrome-related protein 1	yes	no	2	0.0072006	67.153	2313700	2313700	0	2313700	0
IYVLLRR	7	1	931.597	P84089;G3UW85	P84089	91	97	Erh	Enhancer of rudimentary homolog	yes	no	3	0.015674	67.035	2655100	2655100	0	2655100	0
TLLVADPR	8	0	883.513	P14131	P14131	118	125	Rps16	40S ribosomal protein S16	yes	yes	2	0.0023368	67.032	0	0	0	0	0
EAAVPDAVPDR	11	0	1138.56	Q80UE5;O70318	Q80UE5	704	714	Epb4.1l2;Epb41l2	Band 4.1-like protein 2	yes	no	2	0.014872	66.692	11407000	11407000	0	11407000	0
GHAVGDIPGVR	11	0	1076.57	P62267	P62267	109	119	Rps23	40S ribosomal protein S23	yes	yes	2	0.014872	66.692	3650000	3650000	0	3650000	0
VIAVADDFCK	10	0	1136.55	A0A0R4J0H0;A0A0R4J1G7;A0A3Q4EHV9;A7ISP9;F8WJ93;Q3UMY5	A0A0R4J0H0	702	711	Eml4	Echinoderm microtubule-associated protein-like 4	yes	no	2	0.0037616	66.621	1586300	1586300	0	1586300	0
ISDLGGGVPLR	11	0	1082.61	Q922H2	Q922H2	285	295	Pdk3	[Pyruvate dehydrogenase (acetyl-transferring)] kinase isozyme 3, mitochondrial	yes	yes	2	0.015087	66.621	1176900	1176900	0	1176900	0
DAEDAMDAMDGAVLDGR	17	0	1750.71	Q62093	Q62093	67	83	Srsf2	Serine/arginine-rich splicing factor 2	yes	yes	2	8.1927e-05	66.498	22326000	22326000	0	22326000	0
GYIFLEYASPAHAVDAVK	18	0	1949.99	Q8JZQ9	Q8JZQ9	220	237	Eif3b	Eukaryotic translation initiation factor 3 subunit B	yes	yes	2	0.0002256	66.498	5785900	5785900	0	5785900	0
HFSGLEEAVYR	11	0	1306.63	H3BL49;P42932;H3BKR8	H3BL49	21	31	Cct8	T-complex protein 1 subunit theta	yes	no	2	0.015657	66.435	6922400	6922400	0	6922400	0
VVDFIDEGVNIGLEVK	16	0	1744.92	Q9CZN7	Q9CZN7	444	459	Shmt2	Serine hydroxymethyltransferase	yes	yes	2	0.0017947	66.267	2440300	2440300	0	2440300	0
SKITVTSEVPFSKR	14	2	1577.88	P67984	P67984	68	81	Rpl22	60S ribosomal protein L22	yes	yes	2;3	0.0021476	66.262	9513000	9513000	0	9513000	0
AGAKDILVATDVAGR	15	1	1455.8	D3Z0M9	D3Z0M9	711	725	Ddx23		yes	yes	2	0.010733	66.262	3695800	3695800	0	3695800	0
TFHIFYYLLAGAKEK	15	1	1799.96	A0A2R8VHF9;E9QPE7;A0A338P6K2;O08638	A0A2R8VHF9	280	294	Myh11	Myosin-11	yes	no	3	0.0082127	66.246	10369000	10369000	0	10369000	0
VLSSALTK	8	0	817.491	A0A0N4SW95;Q6B966	A0A0N4SW95	76	83	Nlrp14	NACHT, LRR and PYD domains-containing protein 14	yes	no	1	0.017902	66.073	5128900	0	5128900	0	26353000
IGRIEDVTPIPSDSTRR	17	2	1911.02	P62264	P62264	126	142	Rps14	40S ribosomal protein S14	yes	yes	3	1.2502e-08	66.022	7712100	7712100	0	7712100	0
VLYLGAASGTTVSHVSDIVGPDGLVYAVEFSHR	33	0	3415.74	P35550	P35550	169	201	Fbl	rRNA 2-O-methyltransferase fibrillarin	yes	yes	3	6.7212e-23	65.587	8410200	8410200	0	8410200	0
DIIGVAETGSGK	12	0	1145.59	D3Z0M9	D3Z0M9	429	440	Ddx23		yes	yes	2	0.012664	65.5	6109200	6109200	0	6109200	0
DKYVGVSSDSVGGFR	15	1	1571.76	Q5SUH7;Q5SUH6;Q99KN9	Q5SUH7	157	171	Clint1	Clathrin interactor 1	yes	no	2	0.012568	65.5	3953200	3953200	0	3953200	0
IDCFSEVPTSVFGEK	15	0	1713.79	F6U250;F6V095;F7CHQ7;A2APD7;Q9D6Z1	F6U250	65	79	Nop56	Nucleolar protein 56	yes	no	2	0.0038056	65.395	17703000	17703000	0	17703000	0
LYGPSSVSFADDFVR	15	0	1658.79	P19324;A0A140LHR4	P19324	133	147	Serpinh1	Serpin H1	yes	no	2	0.0038056	65.395	15766000	15766000	0	15766000	0
GVGIISEGNETVEDIAAR	18	0	1828.92	D3YYN7;A0A0G2JGX4;Q8VCE0;Q6PIC6;Q6PIE5;Q8VDN2	D3YYN7	627	644	Atp1a2;Atp1a3;Atp1a1	Sodium/potassium-transporting ATPase subunit alpha-3;Sodium/potassium-transporting ATPase subunit alpha-2;Sodium/potassium-transporting ATPase subunit alpha-1	yes	no	2	0.00032532	65.395	3482400	3482400	0	3482400	0
AAAAGAVVASAASGPAEGK	19	0	1554.8	A0A1L1SRL0;A0A1L1STF9;Q8CH25	A0A1L1SRL0	2	20	Sltm	SAFB-like transcription modulator	yes	no	2	0.0055953	65.395	3475200	3475200	0	3475200	0
AAYFGVYDTAK	11	0	1204.58	P48962	P48962	189	199	Slc25a4	ADP/ATP translocase 1	yes	yes	2	0.018976	65.347	26872000	26872000	0	26872000	0
CLDAFPNLR	9	0	1104.54	A2AE89;P10649;F6WHQ7	A2AE89	200	208	Gstm1	Glutathione S-transferase Mu 1	no	no	2	0.018271	65.313	2127000	2127000	0	2127000	0
AALESLRPR	9	1	1011.58	Q6NS54;A0A0R4IZX2	Q6NS54	2	10	Slc9a3r2	Na(+)/H(+) exchange regulatory cofactor NHE-RF	yes	no	2	0.0093511	65.252	2807100	2807100	0	2807100	0
ADAEVITFPK	10	0	1089.57	A2AN81;F6YUI5;B7ZCL7;Q9ESX5	A2AN81	2	11	Dkc1	H/ACA ribonucleoprotein complex subunit 4	yes	no	2	0.011526	65.224	7660900	7660900	0	7660900	0
TFEELKKHEDSAIPR	15	2	1798.92	A0A1W2P7S8;Q6A068	A0A1W2P7S8	751	765	Cdc5l	Cell division cycle 5-like protein	yes	no	4	0.0054141	65.219	5248400	5248400	0	5248400	0
VAPEEHPVLLTEAPLNPK	18	0	1953.06	P63260;P60710;E9Q5F4;G3UZ07;G3UYG0;E9Q606	P63260	96	113	Actg1;Actb	Actin, cytoplasmic 2;Actin, cytoplasmic 2, N-terminally processed;Actin, cytoplasmic 1;Actin, cytoplasmic 1, N-terminally processed	yes	no	3	5.1129e-05	65.107	17446000	17446000	0	17446000	0
ELISNSSDALDKIR	14	1	1559.82	P07901;B7ZC50;A2A6A2;B7ZC49	P07901	47	60	Hsp90aa1	Heat shock protein HSP 90-alpha	yes	no	3	0.0030468	65.092	2271200	2271200	0	2271200	0
SAVEEVVKETPEYR	14	1	1634.82	A2AIR2;Q5DTM8	A2AIR2	369	382	Rnf20	E3 ubiquitin-protein ligase BRE1A	yes	no	3	0.01171	65.092	1404300	1404300	0	1404300	0
TTDIVIR	7	0	816.471	Q6ZPJ3	Q6ZPJ3	650	656	Ube2o	E2/E3 hybrid ubiquitin-protein ligase UBE2O	yes	yes	2	0.00049738	64.803	0	0	0	0	0
LRDLEDSLAR	10	1	1186.63	P48678	P48678	320	329	Lmna	Prelamin-A/C;Lamin-A/C	yes	yes	2	0.0082478	64.73	0	0	0	0	0
GKFEDMAK	8	1	924.438	A0A0J9YUZ4;P63158;A0A0J9YUD8;D3YZ18;D3YVC6	A0A0J9YUZ4	72	79	Hmgb1	High mobility group protein B1	yes	no	2	0.022474	64.567	7371700	7371700	0	7371700	0
VALVTASTDGIGFAIAR	17	0	1660.91	A0A2I3BQ25;A0A2I3BRG8;A0A2I3BPY3;Q9D2U3;Q99LB2	A0A2I3BQ25	35	51	Dhrs4	Dehydrogenase/reductase SDR family member 4	yes	no	2;3	0.00076576	64.55	15546000	15546000	0	15546000	0
SETAPAETAAPAPVEK	16	0	1567.77	P43276	P43276	2	17	Hist1h1b	Histone H1.5	yes	yes	2	0.0011517	64.55	12638000	12638000	0	12638000	0
GTIEILSDVQLIK	13	0	1427.82	P14869;S4R1N1	P14869	150	162	Rplp0	60S acidic ribosomal protein P0	yes	no	2	0.020129	64.374	16417000	16417000	0	16417000	0
YGVIILDEAHER	12	0	1413.73	A0A0G2JGQ5;A0A0G2JG10;Q497W9;O35286	A0A0G2JGQ5	44	55	Dhx15	Pre-mRNA-splicing factor ATP-dependent RNA helicase DHX15	yes	no	2	0.014448	64.297	15176000	15176000	0	15176000	0
TVVTGIEMFHK	11	0	1260.65	Q8BFR5;A0A0U1RPC4	Q8BFR5	301	311	Tufm	Elongation factor Tu, mitochondrial	yes	no	2	0.0026925	64.297	6857000	6857000	0	6857000	0
TSFVNFTDICK	11	0	1330.62	Q99L45	Q99L45	215	225	Eif2s2	Eukaryotic translation initiation factor 2 subunit 2	yes	yes	2	0.021981	64.297	6210000	6210000	0	6210000	0
ALTDELAALGR	11	0	1128.61	Q9EQ06	Q9EQ06	198	208	Hsd17b11	Estradiol 17-beta-dehydrogenase 11	yes	yes	2	0.021851	64.04	19180000	19180000	0	19180000	0
LVGLTGTKEEIDGVAR	16	1	1656.9	Q5SUD5;Q5SUC9	Q5SUD5	212	227	Sco1	Protein SCO1 homolog, mitochondrial	yes	no	3	0.00025405	63.894	1835500	1835500	0	1835500	0
SETAPAAPAAPAPAEKTPVKK	21	2	2031.1	P43274	P43274	2	22	Hist1h1e	Histone H1.4	yes	yes	3	6.4831e-06	63.578	7276500	7276500	0	7276500	0
FLHLPSILDK	10	0	1181.68	A0A1B0GSR5	A0A1B0GSR5	17	26			yes	yes	2	0.013207	63.565	732780000	0	732780000	0	3765100000
ALELEQER	8	0	986.503	A0A5F8MPB9;P26041;P26043	A0A5F8MPB9	372	379	Msn;Rdx	Moesin;Radixin	yes	no	2	0.0043919	63.48	0	0	0	0	0
YSSVYGASVSDEDLK	15	0	1618.74	S4R238;Q9D9P1;D3Z0L4;Q9CRB9	S4R238	49	63	Chchd3	MICOS complex subunit Mic19	yes	no	2	0.0060491	63.473	6939500	6939500	0	6939500	0
NPPGFAFVEFEDPRDAADAVR	21	1	2319.09	P84104	P84104	44	64	Srsf3	Serine/arginine-rich splicing factor 3	yes	yes	2;3	7.546e-05	63.447	197010000	197010000	0	197010000	0
TTTIAVEVK	9	0	960.549	Q8VDJ3	Q8VDJ3	295	303	Hdlbp	Vigilin	yes	yes	2	0.013024	63.419	0	0	0	0	0
LYLVDLAGSEK	11	0	1206.65	E9QAK5;P28738;Q61768;P33175	E9QAK5	227	237	Kif5b;Kif5c;Kif5a	Kinesin-like protein;Kinesin heavy chain isoform 5C;Kinesin-1 heavy chain;Kinesin heavy chain isoform 5A	yes	no	2	0.021468	63.283	15356000	15356000	0	15356000	0
VLPSITTEILK	11	0	1212.73	Q5SQG5;P67778	Q5SQG5	118	128	Phb	Prohibitin	yes	no	2	0.0040985	63.216	37082000	37082000	0	37082000	0
HATAHSLVLVDELGR	15	0	1616.86	P54276	P54276	1201	1215	Msh6	DNA mismatch repair protein Msh6	yes	yes	3	0.0031694	63.128	1381600	1381600	0	1381600	0
RPFPYEIDEILGVR	14	1	1702.9	Q6A058	Q6A058	525	538	Armcx2	Armadillo repeat-containing X-linked protein 2	yes	yes	3	0.00017245	63.037	5372200	5372200	0	5372200	0
SGKAPILIATDVASR	15	1	1497.85	Q3TU25;Q3U741;Q501J6	Q3TU25	387	401	Ddx17	Probable ATP-dependent RNA helicase DDX17	yes	no	3	0.018214	62.861	1202400	1202400	0	1202400	0
LLGVEGTTLR	10	0	1057.61	Q9WTI7	Q9WTI7	341	350	Myo1c	Unconventional myosin-Ic	yes	yes	2	0.016698	62.546	2733600	2733600	0	2733600	0
AITGASLADIMAK	13	0	1260.67	Q8BP67	Q8BP67	81	93	Rpl24	60S ribosomal protein L24	yes	yes	2	0.00053947	62.466	27740000	27740000	0	27740000	0
GEHPGLSIGDVAKK	14	1	1406.75	A0A0J9YUZ4;P63158;A0A0J9YUD8	A0A0J9YUZ4	129	142	Hmgb1	High mobility group protein B1	yes	no	2;3	0.00020532	62.466	9651300	9651300	0	9651300	0
EVVKPLLVSTLGEK	14	1	1510.9	Q9Z2D6	Q9Z2D6	318	331	Mecp2	Methyl-CpG-binding protein 2	yes	yes	2	0.00025683	62.466	4894800	4894800	0	4894800	0
ENVLIGEGAGFK	12	0	1232.64	P45952	P45952	260	271	Acadm	Medium-chain specific acyl-CoA dehydrogenase, mitochondrial	yes	yes	2	0.015937	62.303	5549400	5549400	0	5549400	0
EGSYSISVLYGEEEVPR	17	0	1912.91	B7FAV1;B7FAU9;Q8BTM8	B7FAV1	1492	1508	Flna	Filamin-A	yes	no	2	0.0030925	62.258	8328400	8328400	0	8328400	0
TVINYDVAR	9	0	1049.55	Q810A7	Q810A7	569	577	Ddx42	ATP-dependent RNA helicase DDX42	yes	yes	2	0.01419	61.999	0	0	0	0	0
SVAGEIVLITGAGHGIGR	18	0	1705.95	Q9EQ06	Q9EQ06	33	50	Hsd17b11	Estradiol 17-beta-dehydrogenase 11	yes	yes	3	2.0412e-09	61.962	11342000	11342000	0	11342000	0
LVEDKPGSR	9	1	999.535	Q542V3;Q8VE97	Q542V3	172	180	Srsf4	Serine/arginine-rich splicing factor 4	yes	no	2	0.0091288	61.962	976720	976720	0	976720	0
IKIEHPGLSIGDTAKK	16	2	1705.97	P30681	P30681	113	128	Hmgb2	High mobility group protein B2	yes	yes	4	0.0042239	61.821	45863000	45863000	0	45863000	0
TLDELGIHLTKEELK	15	1	1737.95	G3UZ34;A2AH85;O08810	G3UZ34	385	399	Eftud2	116 kDa U5 small nuclear ribonucleoprotein component	yes	no	3	0.00040094	61.641	10832000	10832000	0	10832000	0
GMGGAFVLVLYDEIKK	16	1	1738.93	P48962;P51881	P48962	281	296	Slc25a4;Slc25a5	ADP/ATP translocase 1;ADP/ATP translocase 2;ADP/ATP translocase 2, N-terminally processed	yes	no	3	2.7177e-07	61.641	0	0	0	0	0
TKPDSSIYPLVDSK	14	1	1548.8	Q8BTI8	Q8BTI8	1103	1116	Srrm2	Serine/arginine repetitive matrix protein 2	yes	yes	2	0.0012421	61.435	9334800	9334800	0	9334800	0
YYTSASGDEMVSLKDYCTR	19	1	2244.97	P07901	P07901	466	484	Hsp90aa1	Heat shock protein HSP 90-alpha	yes	yes	2;3	0.0042439	61.375	27839000	27839000	0	27839000	0
NCIVLIDSTPYR	12	0	1449.73	P62242	P62242	99	110	Rps8	40S ribosomal protein S8	yes	yes	2	0.016645	61.353	11706000	11706000	0	11706000	0
SLAENYFDSTGR	12	0	1358.61	B2KGR2;O89112	B2KGR2	16	27	Lancl1	LanC-like protein 1	yes	no	2	0.016645	61.353	2861600	2861600	0	2861600	0
EAAAALVEEETRR	13	1	1443.73	D6RGA5;Q9D287	D6RGA5	30	42	Bcas2	Pre-mRNA-splicing factor SPF27	yes	no	3	0.00050207	61.212	2780100	2780100	0	2780100	0
ALLGDK	6	0	615.359	Q8VC60	Q8VC60	203	208	Glb1l	Beta-galactosidase-1-like protein	yes	yes	2	0.0017064	61.006	0	0	0	0	0
ATNFLAHEK	9	0	1029.52	D3YUQ9;E9QN08;Q80T06;P57776;D3Z7N2;D3YY68;D3YZT9;A0A0R4J1L2;Q91VK2	D3YUQ9	2	10	Eef1d	Elongation factor 1-delta	yes	no	2	0.015387	60.892	13055000	13055000	0	13055000	0
SINGLGK	7	0	687.392	Q8VEH6	Q8VEH6	220	226	Cbwd1	COBW domain-containing protein 1	yes	yes	1	0.016929	60.799	26443000	0	26443000	0	135870000
TLFGFLGK	8	0	881.501	F6TN80;D6RE22;D3Z4B0;Q3UIX4;F6RDI8;E9Q6E5	F6TN80	24	31	Srsf11		yes	no	1	0.012739	60.788	4670300	4670300	0	4670300	0
ISDDKFGR	8	1	936.466	Q5XJY5	Q5XJY5	305	312	Arcn1	Coatomer subunit delta	yes	yes	2	0.0043673	60.76	0	0	0	0	0
GAGTGGLGLAVEGPSEAK	18	0	1569.8	B7FAV1;B7FAU9;Q8BTM8	B7FAV1	1358	1375	Flna	Filamin-A	yes	no	2	0.0031391	60.628	23234000	23234000	0	23234000	0
GCILTLVER	9	0	1059.57	Q8R1B4	Q8R1B4	440	448	Eif3c	Eukaryotic translation initiation factor 3 subunit C	yes	yes	2	0.013578	60.59	0	0	0	0	0
FKLGLDFPNLPYLIDGSHK	19	1	2173.16	A2AE89;P10649;A2AE91;P15626;D3YX76;D3YVP6;Q80W21;E9QAC8;D3YVP5;Q8R5I6;D3YZ29	A2AE89	51	69	Gstm1;Gstm4;Gstm2;Gstm7	Glutathione S-transferase Mu 1;Glutathione S-transferase Mu 2;Glutathione S-transferase Mu 7	no	no	3	1.3712e-05	60.564	172820000	172820000	0	172820000	0
ASLGSLEGEVEAEASSPK	18	0	1759.85	E9Q616	E9Q616	5521	5538	Ahnak		yes	yes	2	0.0032706	60.448	19006000	19006000	0	19006000	0
ELLIIGGVAAR	11	0	1110.68	Q91VR5	Q91VR5	320	330	Ddx1	ATP-dependent RNA helicase DDX1	yes	yes	2	0.02003	60.436	7578800	7578800	0	7578800	0
VSISEGDDKIEYR	13	1	1509.73	P35550;A0A140LIR6	P35550	129	141	Fbl	rRNA 2-O-methyltransferase fibrillarin	yes	no	3	0.020236	60.401	4243700	4243700	0	4243700	0
TADDPSLSLIK	11	0	1158.61	O54734	O54734	63	73	Ddost	Dolichyl-diphosphooligosaccharide--protein glycosyltransferase 48 kDa subunit	yes	yes	2	0.02001	60.398	9290200	9290200	0	9290200	0
VVLDTMK	7	0	804.442	G3UZA0;Q8BGA5	G3UZA0	204	210	Krr1	KRR1 small subunit processome component homolog	yes	no	1	0.01675	60.344	35734000	0	35734000	0	183600000
KLDPGSEETQTLVR	14	1	1571.82	Q9D8N0	Q9D8N0	401	414	Eef1g	Elongation factor 1-gamma	yes	yes	3	0.00039925	60.196	1486500	1486500	0	1486500	0
RGDLPFVVTR	10	1	1158.65	Q8VDD5	Q8VDD5	1923	1932	Myh9	Myosin-9	yes	yes	2	0.020265	60.102	26475000	26475000	0	26475000	0
GVEICIATPGR	11	0	1171.6	Q3TU25;Q3U741;Q501J6;S4R1I6;Q8BTS0;Q61656	S4R1I6	217	227	Ddx17;Ddx5	Probable ATP-dependent RNA helicase DDX17;Probable ATP-dependent RNA helicase DDX5	no	no	2	0.019861	60.102	8065000	8065000	0	8065000	0
IPFLLSGTSYKDLMPHDLAR	20	1	2273.19	D3YXU1;Q99JY0	D3YXU1	63	82	Hadhb	Trifunctional enzyme subunit beta, mitochondrial;3-ketoacyl-CoA thiolase	yes	no	3;4	0.00049491	60.034	23221000	23221000	0	23221000	0
FGLGSIAGAVGATAVYPIDLVK	22	0	2118.17	Q9QXX4	Q9QXX4	333	354	Slc25a13	Calcium-binding mitochondrial carrier protein Aralar2	yes	yes	2;3	0.00018918	59.857	42361000	42361000	0	42361000	0
VNILFDFVK	9	0	1093.62	A0A1Y7VKT5;Q8BVV6;P59325	A0A1Y7VKT5	21	29	Eif5	Eukaryotic translation initiation factor 5	yes	no	2	0.011964	59.597	0	0	0	0	0
LVPGGGATEIELAK	14	0	1353.75	H3BL49;P42932;H3BJB6	H3BL49	349	362	Cct8	T-complex protein 1 subunit theta	yes	no	2	0.010486	59.57	0	0	0	0	0
DIPVLVATDVAAR	13	0	1338.75	Q810A7	Q810A7	548	560	Ddx42	ATP-dependent RNA helicase DDX42	yes	yes	2	0.016477	59.542	5324500	5324500	0	5324500	0
TALVSADGEEVAVK	14	0	1387.72	A0A0R4J0Q5;P21619	A0A0R4J0Q5	557	570	Lmnb2	Lamin-B2	yes	no	2	0.014221	59.542	2640400	2640400	0	2640400	0
RGFGFVEFEDPRDADDAVYELDGK	24	2	2746.25	Q9D8S5;O35326	Q9D8S5	37	60	Srsf5	Serine/arginine-rich splicing factor 5	yes	no	4	2.3989e-07	59.539	6967400	6967400	0	6967400	0
TLLAHAIAGELDLPILK	17	0	1787.06	Q9DBY8	Q9DBY8	311	327	Nvl	Nuclear valosin-containing protein-like	yes	yes	3	0.00014638	59.513	4653700	4653700	0	4653700	0
EMAEAFAGEIPK	12	0	1291.61	P17427	P17427	142	153	Ap2a2	AP-2 complex subunit alpha-2	yes	yes	2	0.0056779	59.426	8839700	8839700	0	8839700	0
IAGYVTHLMK	10	0	1131.61	P63276	P63276	50	59	Rps17	40S ribosomal protein S17	yes	yes	2;3	0.0085276	59.245	9017400	9017400	0	9017400	0
EVPAPALPVVR	11	0	1146.68	Q3TIX9	Q3TIX9	60	70	Usp39	U4/U6.U5 tri-snRNP-associated protein 2	yes	yes	2	0.021624	59.245	3229600	3229600	0	3229600	0
TAVCDIPPR	9	0	1027.51	P99024;Q9CWF2;Q7TMM9;Q9D6F9;P68372	P99024	351	359	Tubb5;Tubb2b;Tubb2a;Tubb4a;Tubb4b	Tubulin beta-5 chain;Tubulin beta-2B chain;Tubulin beta-2A chain;Tubulin beta-4A chain;Tubulin beta-4B chain	no	no	2	0.011392	59.245	0	0	0	0	0
ESEITDEDIDGILER	15	0	1732.8	Q91ZW3	Q91ZW3	665	679	Smarca5	SWI/SNF-related matrix-associated actin-dependent regulator of chromatin subfamily A member 5	yes	yes	2	0.01154	59.198	10083000	10083000	0	10083000	0
VSADGAAKAEPK	12	1	1142.59	P18608	P18608	6	17	Hmgn1	Non-histone chromosomal protein HMG-14	yes	yes	2	0.00969	59.067	3345900	3345900	0	3345900	0
FHISAFPTLK	10	0	1159.64	Q921X9	Q921X9	345	354	Pdia5	Protein disulfide-isomerase A5	yes	yes	2	0.022578	58.981	15214000	15214000	0	15214000	0
EKPSTEEEKEVGGLR	15	2	1686.84	Q31125	Q31125	280	294	Slc39a7	Zinc transporter SLC39A7	yes	yes	4	0.0078081	58.831	3047700	3047700	0	3047700	0
VLEDIQLNLFTR	12	0	1459.8	Q8CGC7	Q8CGC7	1404	1415	Eprs	Bifunctional glutamate/proline--tRNA ligase;Glutamate--tRNA ligase;Proline--tRNA ligase	yes	yes	2	0.018418	58.699	3916000	3916000	0	3916000	0
SPSLGSDLTFATR	13	0	1350.68	B7ZNU9;Q61235	B7ZNU9	373	385	Sntb2	Beta-2-syntrophin	yes	no	2	0.017775	58.676	13381000	13381000	0	13381000	0
VVIEDGVGDAVLTR	14	0	1441.78	P01027	P01027	292	305	C3	Complement C3;Complement C3 beta chain;C3-beta-c;Complement C3 alpha chain;C3a anaphylatoxin;Acylation stimulating protein;Complement C3b alpha chain;Complement C3c alpha chain fragment 1;Complement C3dg fragment;Complement C3g fragment;Complement C3d fragment;Complement C3f fragment;Complement C3c alpha chain fragment 2	yes	yes	2	0.014263	58.676	2594500	2594500	0	2594500	0
AIGTDEDLAHSSIR	14	0	1483.73	F7CZD1;F6TXD3;Q9Z1J3	F7CZD1	43	56	Gm28036;Nfs1	Cysteine desulfurase, mitochondrial	yes	no	2	0.014263	58.676	2192600	2192600	0	2192600	0
HGVVPLATYMR	11	0	1242.65	Q9CQM8;O09167	Q9CQM8	22	32	Rpl21	60S ribosomal protein L21	yes	no	2	0.017231	58.676	0	0	0	0	0
VSGLLEEVAGGFTSK	15	0	1492.78	P54276	P54276	868	882	Msh6	DNA mismatch repair protein Msh6	yes	yes	2	0.011254	58.674	19920000	19920000	0	19920000	0
VVAGVAAALAHKYH	14	1	1405.78	A8DUK4	A8DUK4	134	147	Hbbt1		yes	yes	3;4	0.00013362	58.674	8283500	8283500	0	8283500	0
KSFTPDHVVYAR	12	1	1418.73	O54724	O54724	301	312	Ptrf	Polymerase I and transcript release factor	yes	yes	3	0.0063605	58.674	7024100	7024100	0	7024100	0
EVLLTTAK	8	0	873.517	A0A668KL90;A2AHJ7;A2AHK0;Q80UP3	A0A668KL90	592	599	Dgkz	Diacylglycerol kinase;Diacylglycerol kinase zeta	yes	no	1	0.011929	58.604	5419600	0	5419600	0	27846000
SETAPAAPAAPAPAEK	16	0	1477.74	P43274	P43274	2	17	Hist1h1e	Histone H1.4	yes	yes	2	0.004074	58.172	34427000	34427000	0	34427000	0
IHACLYFIAPTGHSLK	16	0	1826.95	A0A0J9YTY0;A0A0J9YUL3;Q8C1B7;A0A0J9YVA6	A0A0J9YTY0	147	162	Sept11	Septin-11	yes	no	2;3	0.0017184	58.079	12606000	12606000	0	12606000	0
IDIIPNPQER	10	0	1193.64	P11499;E9PX27	P11499	73	82	Hsp90ab1	Heat shock protein HSP 90-beta	yes	no	2	0.013891	57.96	0	0	0	0	0
IITLTNVGGLGTK	13	0	1285.76	A0A571BED3;A0A571BG73;Q3UY96	A0A571BED3	636	648	Cfap74	Cilia- and flagella-associated protein 74	yes	no	2	0.019001	57.859	10416000000	0	10416000000	0	53517000000
RVLGLVLLR	9	1	1037.71	P27048;P63163	P27048	65	73	Snrpb;Snrpn	Small nuclear ribonucleoprotein-associated protein B;Small nuclear ribonucleoprotein-associated protein N	yes	no	3	0.008866	57.859	4125600	4125600	0	4125600	0
DLDVEGTDEPIFGKKPR	17	2	1914.97	Q9CZU3	Q9CZU3	63	79	Skiv2l2	Superkiller viralicidic activity 2-like 2	yes	yes	2	0.021251	57.836	1317700	1317700	0	1317700	0
AGYSPIMLTALATLK	15	0	1548.86	Q8BX02	Q8BX02	692	706	Kank2	KN motif and ankyrin repeat domain-containing protein 2	yes	yes	2	0.01072	57.802	13095000	13095000	0	13095000	0
KHHLDGETEEER	12	1	1478.67	A2AE89;P10649;F6WHQ7	A2AE89	83	94	Gstm1	Glutathione S-transferase Mu 1	yes	no	3	0.0059315	57.802	5193500	5193500	0	5193500	0
VGSLGLLAHSKEK	13	1	1337.77	A0A0R4J1H6;E9QP99;P55937	A0A0R4J1H6	183	195	Golga3	Golgin subfamily A member 3	yes	no	2	0.022326	57.598	840830	0	840830	0	4320300
ACARPLISVYSEKGESSGK	19	2	2038.02	Q9D8E6	Q9D8E6	2	20	Rpl4	60S ribosomal protein L4	yes	yes	3	0.00077621	57.496	26042000	26042000	0	26042000	0
DVFLGTFLYEYSR	13	0	1608.78	P07724	P07724	348	360	Alb	Serum albumin	yes	yes	2	0.00098274	57.492	0	0	0	0	0
LTMSRQLR	8	1	1003.56	Q3TCJ8	Q3TCJ8	172	179	Ccdc69	Coiled-coil domain-containing protein 69	yes	yes	2	0.0097161	57.463	0	0	0	0	0
GAVDGGLSIPHSTK	14	0	1337.69	D3YYV8;P47962	D3YYV8	115	128	Rpl5	60S ribosomal protein L5	yes	no	2	0.014327	57.348	10723000	10723000	0	10723000	0
FGELALTK	8	0	877.491	Q8BMS1	Q8BMS1	327	334	Hadha	Trifunctional enzyme subunit alpha, mitochondrial;Long-chain enoyl-CoA hydratase;Long chain 3-hydroxyacyl-CoA dehydrogenase	yes	yes	1	0.011867	57.177	8001400	8001400	0	8001400	0
EEVMSLKR	8	1	990.517	A0A1L1SQS5;Q80XP8	A0A1L1SQS5	10	17	Fam76b	Protein FAM76B	yes	no	3	0.0086489	57.177	365850	0	365850	0	1879800
SALPAQSAATLPAR	14	0	1352.74	Q62261	Q62261	2177	2190	Sptbn1	Spectrin beta chain, non-erythrocytic 1	yes	yes	2	0.014343	57.019	4518600	4518600	0	4518600	0
SGSIVVEGHELHEEDIR	17	0	1904.92	Q8BU30	Q8BU30	930	946	Iars	Isoleucine--tRNA ligase, cytoplasmic	yes	yes	2	0.0079792	57.019	3222700	3222700	0	3222700	0
TGLLIAAGGGGAAK	14	0	1155.66	D3Z3S1;Q9WUQ2	D3Z3S1	25	38	Preb	Prolactin regulatory element-binding protein	yes	no	2	0.014357	56.725	6523900	6523900	0	6523900	0
NFYVEVPELAK	11	0	1307.68	F8WHR6;Q569Z5	F8WHR6	334	344	Ddx46	Probable ATP-dependent RNA helicase DDX46	yes	no	2	0.0030296	56.563	0	0	0	0	0
VSHIEDPALIR	11	0	1248.68	Q9CQC7	Q9CQC7	57	67	Ndufb4	NADH dehydrogenase [ubiquinone] 1 beta subcomplex subunit 4	yes	yes	3	0.015599	56.548	3350000	3350000	0	3350000	0
VTPTRTEIIILATR	14	1	1582.94	A0A140LI77;D3YV43;P62908	A0A140LI77	41	54	Rps3	40S ribosomal protein S3	yes	no	3	5.2603e-06	56.482	0	0	0	0	0
SSGLISELPSEEGR	14	0	1459.72	F7AI27;D3Z030;Q6EDY6	F7AI27	567	580	Lrrc16a	Leucine-rich repeat-containing protein 16A	yes	no	2	0.014374	56.359	5661100	5661100	0	5661100	0
SPFSVGVSPSLDLSK	15	0	1518.79	B7FAV1;B7FAU9;Q8BTM8	B7FAV1	935	949	Flna	Filamin-A	yes	no	2	0.021461	56.225	41904000	41904000	0	41904000	0
AVVGVVAGGGRIDKPILK	18	2	1748.07	P62918	P62918	164	181	Rpl8	60S ribosomal protein L8	yes	yes	3	2.3099e-10	56.215	0	0	0	0	0
VRTELADKVTK	11	2	1258.72	Q8VDD5	Q8VDD5	1267	1277	Myh9	Myosin-9	yes	yes	4	0.0088914	56.205	2517300	2517300	0	2517300	0
VSHLLGINVTDFTR	14	0	1570.85	Q8VDD5	Q8VDD5	374	387	Myh9	Myosin-9	yes	yes	2;3	7.9228e-07	55.885	15636000	15636000	0	15636000	0
TAPGSLDHITVVTADGK	17	0	1680.87	Q9D6S7	Q9D6S7	111	127	Mrrf	Ribosome-recycling factor, mitochondrial	yes	yes	3	0.00012844	55.864	4497300	4497300	0	4497300	0
VLDSGAPIKIPVGPETLGR	19	1	1918.09	P56480	P56480	125	143	Atp5b	ATP synthase subunit beta, mitochondrial	yes	yes	3	0.01007	55.688	43409000	43409000	0	43409000	0
TVDATGKEVELTHR	14	1	1554.8	Q922U1	Q922U1	264	277	Prpf3	U4/U6 small nuclear ribonucleoprotein Prp3	yes	yes	3	0.016441	55.656	1439800	1439800	0	1439800	0
YTMGDAPDYDR	11	0	1302.52	P15626;Q8R5I6	P15626	33	43	Gstm2;Gstm4	Glutathione S-transferase Mu 2	yes	no	2	0.0027739	55.567	0	0	0	0	0
SPEVLLGSAR	10	0	1027.57	D3Z2T9;P11440	D3Z2T9	171	180	Cdk1	Cyclin-dependent kinase 1	yes	no	2	0.0079138	55.549	0	0	0	0	0
DGYDYDGYR	9	0	1122.43	H7BX95;Q6PDM2	H7BX95	75	83	Srsf1	Serine/arginine-rich splicing factor 1	yes	no	2	0.018506	55.531	0	0	0	0	0
LESAGLGYR	9	0	964.498	A0A171EBL2;A0A8I4P9C4;E9Q555	A0A171EBL2	2498	2506	Rnf213	E3 ubiquitin-protein ligase RNF213	yes	no	2	0.018506	55.531	0	0	0	0	0
SHCFVTYSTVEEAVATR	17	0	1955.9	F6RJ39;Q9JIX8;Q52KR6;B8JJ92;B8JJ91	F6RJ39	983	999	Acin1	Apoptotic chromatin condensation inducer in the nucleus	yes	no	2;3	0.009232	55.452	7225500	7225500	0	7225500	0
AGNLGGGVVTIER	13	0	1241.67	P67984	P67984	53	65	Rpl22	60S ribosomal protein L22	yes	yes	2	0.022134	55.401	67210000	67210000	0	67210000	0
LCSLFYTNEEVAK	13	0	1572.75	Q8K310;A0A494BAZ7;A0A494BAD4	Q8K310	804	816	Matr3	Matrin-3	yes	no	2	0.022134	55.401	4490700	4490700	0	4490700	0
VTAGISFAIPSDK	13	0	1304.7	Q9R118	Q9R118	347	359	Htra1	Serine protease HTRA1	yes	yes	2	0.022134	55.401	3563700	3563700	0	3563700	0
ALAAAGYDVEKNNSR	15	1	1577.78	P15864;I7HFT9;Q07133;P43274;P43277	P43274	65	79	Hist1h1c;Hist1h1t;Hist1h1e;Hist1h1d	Histone H1.2;Histone H1t;Histone H1.4;Histone H1.3	no	no	3	0.0022447	55.186	1677400	1677400	0	1677400	0
SSGAGSTSDAYTVIQVGR	18	0	1754.84	A0A0N4SW73;Q8R361	A0A0N4SW73	35	52	Rab11fip5	Rab11 family-interacting protein 5	yes	no	2	0.0074009	54.7	1646600	1646600	0	1646600	0
RAPFDLFENK	10	1	1235.63	P11499;E9Q3D6	P11499	338	347	Hsp90ab1	Heat shock protein HSP 90-beta	yes	no	2	0.0069192	54.608	0	0	0	0	0
KHHLDGETEEERIR	14	2	1747.86	A2AE89;P10649;F6WHQ7	A2AE89	83	96	Gstm1	Glutathione S-transferase Mu 1	yes	no	5	0.0045529	54.524	5334200	5334200	0	5334200	0
SLAGSSGPGASSGPGGDHSELIVR	24	0	2194.06	D3YUQ9;E9QN08;Q80T06;P57776;A0A0R4J1E2	D3YUQ9	60	83	Eef1d	Elongation factor 1-delta	yes	no	2	2.7023e-05	54.501	11987000	11987000	0	11987000	0
EASLILGVSPSAGK	14	0	1327.73	Q78YY6	Q78YY6	94	107	Dnajc15	DnaJ homolog subfamily C member 15	yes	yes	2	0.013957	54.471	4300200	4300200	0	4300200	0
TTGFTFVVDR	10	0	1141.58	A0A3B2WDB3;Q3UN02	A0A3B2WDB3	197	206	Lclat1	Lysocardiolipin acyltransferase 1	yes	no	2	0.010148	54.416	0	0	0	0	0
KVPGVTAIELDEDTGTFR	18	1	1946.99	A0A0G2JEP0;Q61584;A0A0H2UH27	A0A0G2JEP0	246	263	Fxr1	Fragile X mental retardation syndrome-related protein 1	yes	no	3	8.8063e-07	54.368	10034000	10034000	0	10034000	0
LPGGELNPGEDEVEGLKR	18	1	1907.96	A0A1D5RLS2;A0A1D5RM23;Q9CQF3	A0A1D5RLS2	45	62	Nudt21	Cleavage and polyadenylation specificity factor subunit 5	yes	no	3	0.0020288	54.288	5770900	5770900	0	5770900	0
MVQLVPLLK	9	0	1039.65	Q9QZ82;A0A087WRU6	Q9QZ82	366	374	Cyp11a1	Cholesterol side-chain cleavage enzyme, mitochondrial	yes	no	2	0.014844	54.205	1186000	1186000	0	1186000	0
SCGSSTPDEFPTDIPGTK	18	0	1894.83	Q9Z0N1;A2AAW9	Q9Z0N1	104	121	Eif2s3x	Eukaryotic translation initiation factor 2 subunit 3, X-linked	yes	no	2	0.0082358	53.754	22007000	22007000	0	22007000	0
VYSASLESLLTKR	13	1	1465.81	Q7TPV4	Q7TPV4	972	984	Mybbp1a	Myb-binding protein 1A	yes	yes	3	0.0099737	53.754	2289900	2289900	0	2289900	0
AAHGGSAASSALK	13	0	1126.57	G5E8R8;Q6P5G6	G5E8R8	2	14	Ubxn7	UBX domain-containing protein 7	yes	no	2	0.0094089	53.751	4549200	4549200	0	4549200	0
AVAVGRPSNEELR	13	1	1396.74	A0A0J9YTY0;A0A0J9YUL3;Q8C1B7	A0A0J9YTY0	2	14	Sept11	Septin-11	yes	no	2	0.0061951	53.683	15472000	15472000	0	15472000	0
NPPGFAFVEFEDPRDAEDAVR	21	1	2377.1	A0A3Q4EH04;A0A3Q4L335;A0A3Q4L393;Q8BL97	A0A3Q4EH04	45	65	Srsf7	Serine/arginine-rich splicing factor 7	yes	no	3	8.9758e-07	53.625	69358000	69358000	0	69358000	0
GITGVDLFGTTDAVVK	16	0	1591.85	F8WHL2;Q8CIE6	F8WHL2	183	198	Copa	Coatomer subunit alpha;Coatomer subunit alpha;Xenin;Proxenin	yes	no	2	0.010157	53.567	84551000	84551000	0	84551000	0
DFTPSGIAGAFRR	13	1	1393.71	P56135;F8WHP8	P56135	28	40	Atp5j2	ATP synthase subunit f, mitochondrial	yes	no	3	0.00077199	53.557	7442800	7442800	0	7442800	0
DVVFVVGEGEDHDIPIGIDK	20	0	2152.07	Q64378	Q64378	185	204	Fkbp5	Peptidyl-prolyl cis-trans isomerase FKBP5;Peptidyl-prolyl cis-trans isomerase FKBP5, N-terminally processed	yes	yes	2;3	0.01548	53.278	6794100	6794100	0	6794100	0
ATEEPSGTGSDELIK	15	0	1532.72	O54724	O54724	33	47	Ptrf	Polymerase I and transcript release factor	yes	yes	2	0.0096932	53.211	12816000	12816000	0	12816000	0
DKFLVRPDLR	10	2	1257.72	A0A0G2JER8;Q6P6J4	A0A0G2JER8	2	11	Alkbh2	Alpha-ketoglutarate-dependent dioxygenase alkB homolog 2	yes	no	2	0.010644	53.166	4348900	0	4348900	0	22345000
SGVSLAALKK	10	1	972.597	P15864;P43275;P43274;P43277	P43274	55	64	Hist1h1c;Hist1h1a;Hist1h1e;Hist1h1d	Histone H1.2;Histone H1.1;Histone H1.4;Histone H1.3	no	no	3	0.0061136	53.124	36320000	36320000	0	36320000	0
LPETSLFETEETR	13	0	1550.75	Q8R2P8;Q99MN1	Q8R2P8	435	447	Kars	Lysine--tRNA ligase	yes	no	2	0.020081	53.08	9295400	9295400	0	9295400	0
GPPPPPTASEPTR	13	0	1302.66	Q8CGF7	Q8CGF7	1084	1096	Tcerg1	Transcription elongation regulator 1	yes	yes	2	0.019824	52.79	3268200	3268200	0	3268200	0
SDFDEFER	8	0	1043.42	Q80XR5;P26369;A0A140LJ08	Q80XR5	2	9	U2af2	Splicing factor U2AF 65 kDa subunit	yes	no	2	0.021917	52.716	665080	665080	0	665080	0
VGDVYIPR	8	0	917.497	Q62093	Q62093	40	47	Srsf2	Serine/arginine-rich splicing factor 2	yes	yes	1	0.022425	52.683	15075000	15075000	0	15075000	0
AGKPVLHYFDGR	12	1	1358.71	P30115	P30115	2	13	Gsta3	Glutathione S-transferase A3	yes	yes	3	0.010363	52.555	10341000	10341000	0	10341000	0
EALELTDTGLLSGSEER	17	0	1818.88	Q9JHU4	Q9JHU4	1300	1316	Dync1h1	Cytoplasmic dynein 1 heavy chain 1	yes	yes	2	0.011344	52.555	1612400	1612400	0	1612400	0
DTGKTPVEPEVAIHR	15	1	1647.86	P60867	P60867	5	19	Rps20	40S ribosomal protein S20	yes	yes	4	0.0025541	52.527	4380800	4380800	0	4380800	0
ECLPLIIFLR	10	0	1272.73	P62702	P62702	40	49	Rps4x	40S ribosomal protein S4, X isoform	yes	yes	2	0.0147	52.482	0	0	0	0	0
IGIEIIKR	8	1	940.607	P63038	P63038	463	470	Hspd1	60 kDa heat shock protein, mitochondrial	yes	yes	3	0.012956	52.403	2365800	2365800	0	2365800	0
SGELMIK	7	0	776.41	Q8VDC1	Q8VDC1	1302	1308	Fyco1	FYVE and coiled-coil domain-containing protein 1	yes	yes	1	0.015954	52.231	2359600	0	2359600	0	12124000
LFYSTFATDDRR	12	1	1490.72	Q8BH95	Q8BH95	262	273	Echs1	Enoyl-CoA hydratase, mitochondrial	yes	yes	3	0.0068963	51.979	1581700	1581700	0	1581700	0
SAWYMGPVTR	10	0	1166.55	A0A338P6Q0;A0A338P675;P47941	A0A338P6Q0	12	21	Crkl	Crk-like protein	yes	no	3	0.011258	51.445	1772300	0	1772300	0	9106200
AVLGEVALYSGAR	13	0	1304.71	G3UY93;Q9Z1Q9;G3UZ22;G3UYW2	G3UY93	202	214	Vars	Valine--tRNA ligase	yes	no	2	0.018493	51.286	44557000	44557000	0	44557000	0
ISTVELEDLKR	11	1	1301.72	Q99MQ4	Q99MQ4	246	256	Aspn	Asporin	yes	yes	3	0.0066028	51.286	4581300	4581300	0	4581300	0
VVDALGNAIDGK	12	0	1170.62	Q03265;D3Z6F5	Q03265	150	161	Atp5a1	ATP synthase subunit alpha, mitochondrial;ATP synthase subunit alpha	yes	no	2	0.022676	51.268	2981700	2981700	0	2981700	0
LASAAYPDPSK	11	0	1118.56	A2A7S7;Q91WQ3	A2A7S7	372	382	Yars	Tyrosine--tRNA ligase;Tyrosine--tRNA ligase, cytoplasmic;Tyrosine--tRNA ligase, cytoplasmic, N-terminally processed	yes	no	2	0.0097318	51.268	0	0	0	0	0
HSQFIGYPITLYLEK	15	0	1807.95	P11499	P11499	205	219	Hsp90ab1	Heat shock protein HSP 90-beta	yes	yes	3	0.020455	51.265	9517500	9517500	0	9517500	0
LTPEEEEILNKKR	13	2	1597.87	P62242	P62242	129	141	Rps8	40S ribosomal protein S8	yes	yes	4	0.012815	51.218	2645600	2645600	0	2645600	0
TDASSASSFLDSDELER	17	0	1828.8	F7AA45;E9Q8F0;Q8VH51	F7AA45	170	186	Rbm39	RNA-binding protein 39	yes	no	2	0.012237	51.211	15565000	15565000	0	15565000	0
TTPPSVFFPVFVR	13	0	1492.81	D3Z7A7;E9PXE6;F8VPR2;A2AQW2;Q6ZPF4;A2APV2	D3Z7A7	908	920	Fmnl3;Fmnl2	Formin-like protein 3;Formin-like protein 2	yes	no	2	0.018918	51.092	6421800	6421800	0	6421800	0
TVEAEAAHGTVTR	13	0	1340.67	O88844	O88844	302	314	Idh1	Isocitrate dehydrogenase [NADP] cytoplasmic	yes	yes	2	0.018918	51.092	2716900	2716900	0	2716900	0
LVDPVAAAGGPGSR	14	0	1265.67	A0A0U1RPR4;A0A0U1RNN2;A0A0U1RP07;A0A0U1RNG1;Q9CWK3	A0A0U1RPR4	27	40	Cd2bp2	CD2 antigen cytoplasmic tail-binding protein 2	yes	no	2	0.011531	51.092	1673400	1673400	0	1673400	0
VREEVPLELVEAHVK	15	1	1745.97	Q3UNN4;P97496	Q3UNN4	724	738	Smarcc1	SWI/SNF complex subunit SMARCC1	yes	no	3	0.021366	50.608	6891100	6891100	0	6891100	0
LLVVDPETDEHFKR	14	1	1696.88	Q6NS54;A0A0R4IZX2;A0A3Q4EHM9;A0A0R4J006;A0A3Q4EBU8;Q9JHL1	Q6NS54	225	238	Slc9a3r2	Na(+)/H(+) exchange regulatory cofactor NHE-RF;Na(+)/H(+) exchange regulatory cofactor NHE-RF2	yes	no	4	0.0022869	50.563	2886300	2886300	0	2886300	0
ADKMDMSLDDIIK	13	1	1493.71	G3X9I4;Q9JJW6;O08583	G3X9I4	2	14	Alyref2;Alyref	Aly/REF export factor 2;THO complex subunit 4	yes	no	2	0.00613	50.484	13488000	13488000	0	13488000	0
YGASLLHTYAGPSLLVLSTR	20	0	2118.15	E9Q405;A0A1C7ZN10;K3W4L0;B2RRE2;E9QAX2;Q9JMH9	E9Q405	98	117	Myo18a	Unconventional myosin-XVIIIa	yes	no	3	1.9998e-11	50.425	0	0	0	0	0
EIAGATPHITAAEGR	15	0	1492.76	Q8CAQ8;E9QAY6;A0A0U1RP81;E9Q800	Q8CAQ8	315	329	Immt	MICOS complex subunit Mic60	yes	no	2;3	0.01059	50.354	4620900	4620900	0	4620900	0
DLGLAFEIPAHIK	13	0	1422.79	Q91VR5;A0A1Y7VM48	Q91VR5	211	223	Ddx1	ATP-dependent RNA helicase DDX1	yes	no	2	0.020714	50.353	12042000	12042000	0	12042000	0
SSITPGTVLIILTGR	15	0	1526.9	P47911;A0A0J9YU32	P47911	150	164	Rpl6	60S ribosomal protein L6	yes	no	2	0.0060153	50.286	19487000	19487000	0	19487000	0
TVVSGSCAAHSLLITTEGK	19	0	1929.98	Q8BK67;A2AWQ2	Q8BK67	150	168	Rcc2	Protein RCC2	yes	no	2	0.0098948	50.207	12328000	12328000	0	12328000	0
SSTPLPTVSSSAENTR	16	0	1632.8	Q61029;Q61033	Q61029	157	172	Tmpo	Lamina-associated polypeptide 2, isoforms beta/delta/epsilon/gamma;Lamina-associated polypeptide 2, isoforms alpha/zeta	yes	no	2	0.011146	50.207	8161200	8161200	0	8161200	0
DNSTATALEVVAGER	15	0	1531.75	Q8CG48	Q8CG48	534	548	Smc2	Structural maintenance of chromosomes protein 2	yes	yes	2	0.01072	50.207	2488500	2488500	0	2488500	0
RLAEDGAHVVVSSR	14	1	1494.79	A0A2I3BQ25;A0A2I3BRG8;A0A2I3BPY3;Q9D2U3;Q99LB2	A0A2I3BQ25	52	65	Dhrs4	Dehydrogenase/reductase SDR family member 4	yes	no	3	0.003555	50.155	1900600	1900600	0	1900600	0
SVEVSDPVPAGDLVK	15	0	1510.79	P21981	P21981	634	648	Tgm2	Protein-glutamine gamma-glutamyltransferase 2	yes	yes	2	0.010771	50.149	4806000	4806000	0	4806000	0
SGYPDIGFPLFPLSK	15	0	1636.85	Q6ZPJ3	Q6ZPJ3	1245	1259	Ube2o	E2/E3 hybrid ubiquitin-protein ligase UBE2O	yes	yes	2	0.010775	50.145	17821000	17821000	0	17821000	0
FLISLGKR	8	1	932.581	Q8K561	Q8K561	642	649	Otoa	Otoancorin	yes	yes	3	0.0082827	50.127	36173000	0	36173000	0	185860000
SEAAPAAPAAAPPAEKAPAK	20	1	1814.95	P15864	P15864	2	21	Hist1h1c	Histone H1.2	yes	yes	2	0.0031483	49.627	11037000	11037000	0	11037000	0
TGTAEMSSILEER	13	0	1422.67	Q03265;D6RJ16	Q03265	46	58	Atp5a1	ATP synthase subunit alpha, mitochondrial	yes	no	2	0.020997	49.5	0	0	0	0	0
SGGITGIEAFAFGSGLR	17	0	1638.84	A0A0U1RNP2;E9PYH6	A0A0U1RNP2	341	357	Setd1a	Histone-lysine N-methyltransferase	yes	no	2	0.010921	49.298	6999200	6999200	0	6999200	0
APSHVPFLLIGGGTAAFAAAR	21	0	2023.1	B1AU25;Q9Z0X1	B1AU25	123	143	Aifm1	Apoptosis-inducing factor 1, mitochondrial	yes	no	3	0.016891	49.188	15233000	15233000	0	15233000	0
LIHPDEDISLEERR	14	1	1720.87	M0QWF0;Q9JMD0	M0QWF0	227	240	Zfp207;Znf207	BUB3-interacting and GLEBS motif-containing protein ZNF207	yes	no	3	0.011139	49.12	4652100	4652100	0	4652100	0
LSPSMAVK	8	0	831.452	Q9QY01	Q9QY01	912	919	Ulk2	Serine/threonine-protein kinase ULK2	yes	yes	2	0.017242	49.058	41806000	0	41806000	0	214810000
LVEKYESDRTELGFTSFIR	19	2	2289.16	Q921X9	Q921X9	482	500	Pdia5	Protein disulfide-isomerase A5	yes	yes	3	0.0055909	48.848	6929300	6929300	0	6929300	0
TEDPDLPAFYFDPLINPISHR	21	0	2456.2	B7ZC27;Q99PV0	B7ZC27	287	307	Prpf8	Pre-mRNA-processing-splicing factor 8	yes	no	3	0.018229	48.824	6879000	6879000	0	6879000	0
LSDADKRLANR	11	2	1257.68	A0A1D5RLR3;Q8C5L7	A0A1D5RLR3	113	123	Rbm34	RNA-binding protein 34	yes	no	2	0.0065484	48.796	0	0	0	0	0
KVHPAVVIR	9	1	1017.64	P62830	P62830	75	83	Rpl23	60S ribosomal protein L23	yes	yes	3	0.010326	48.794	2636300	2636300	0	2636300	0
SDTAIIYPEAPEELSR	16	0	1789.87	A0A0J9YUY9;A0A0J9YU94;A0A0J9YVF6;A0A0J9YV01;H9H9S3;A0A0M3HEP2;Q9R0G7	A0A0J9YUY9	146	161	Zeb2	Zinc finger E-box-binding homeobox 2	yes	no	2	0.011257	48.741	1395600	1395600	0	1395600	0
GFEFTLMVVGESGLGK	16	0	1669.84	D3Z1S1;F6WYM0;D3YYB1;D3Z3C0;P42208;D3YV76;D3YZU7;E9Q9F5;E9Q1G8;O55131	D3Z1S1	65	80	Sept2;Sept7	Septin-2;Septin-7	yes	no	2	0.00055861	48.659	0	0	0	0	0
IEDVTPIPSDSTRR	14	1	1584.81	P62264	P62264	129	142	Rps14	40S ribosomal protein S14	yes	yes	2;3	0.0080587	48.561	11000000	11000000	0	11000000	0
LDHKFDLMYAK	11	1	1379.69	P68373;P68369;P05213;P05214;A0A0A0MQA5;P68368;Q3UX10;Q9JJZ2	P68373	391	401	Tuba1c;Tuba1a;Tuba1b;Tuba3a;Tuba4a;Tubal3;Tuba8	Tubulin alpha-1C chain;Tubulin alpha-1A chain;Tubulin alpha-1B chain;Tubulin alpha-3 chain;Tubulin alpha-4A chain;Tubulin alpha chain-like 3;Tubulin alpha-8 chain	yes	no	2	0.019798	48.284	9522400	9522400	0	9522400	0
LATPSK	6	0	615.359	Q8CHP0	Q8CHP0	361	366	Zc3h3	Zinc finger CCCH domain-containing protein 3	yes	yes	2	0.02234	48.242	0	0	0	0	0
SEPKLR	6	1	728.418	Q059U7	REV__Q640M1	111	116	Intu	Protein inturned	yes	no	2	0.011104	48.242	0	0	0	0	0
STVGLR	6	0	631.365	G3UZ73	G3UZ73	363	368	Cobl		yes	yes	2	0.02234	48.242	0	0	0	0	0
LAVTSLEGVGESTR	14	0	1417.74	Q61578	Q61578	331	344	Fdxr	NADPH:adrenodoxin oxidoreductase, mitochondrial	yes	yes	2	0.0088206	48.004	0	0	0	0	0
SLVIPEKFQHILR	13	1	1578.92	A0A3Q4EGP3;S4R1N6;F6YVP7;P62270	A0A3Q4EGP3	2	14	Rps18;Gm10260	40S ribosomal protein S18	yes	no	3	0.0070957	47.915	4570400	4570400	0	4570400	0
GDINILLIGDPSVAK	15	0	1523.86	P25206	P25206	337	351	Mcm3	DNA replication licensing factor MCM3	yes	yes	2	0.012755	47.915	2959800	2959800	0	2959800	0
TYEDLKR	7	1	923.471	Q9D554	Q9D554	491	497	Sf3a3	Splicing factor 3A subunit 3	yes	yes	3	0.017721	47.849	540860	540860	0	540860	0
DLRGFPSGDKAQNQLR	16	2	1800.92	A2ANF5	A2ANF5	112	127	Tmem29		yes	yes	2	0.0098429	47.844	13547000	0	13547000	0	69607000
KYDLESASAILPSSALEDPELGSLGK	26	1	2689.37	A0A0N4SW73;Q8R361	A0A0N4SW73	202	227	Rab11fip5	Rab11 family-interacting protein 5	yes	no	3	6.069e-05	47.745	5959900	5959900	0	5959900	0
SHTILLVQPTK	11	0	1235.72	P84089;A0A1W2P7H9;A0A1W2P7T3	P84089	2	12	Erh	Enhancer of rudimentary homolog	yes	no	2	0.012037	47.706	2601700	2601700	0	2601700	0
AVSILPLLGHGVPR	14	0	1427.86	Q923D5	Q923D5	179	192	Wbp11	WW domain-binding protein 11	yes	yes	2	0.0099031	47.706	0	0	0	0	0
HRRIYAGMVSLMDEAVGNVTK	21	2	2346.19	A0A0R4J138;P50429	A0A0R4J138	263	283	Arsb	Arylsulfatase B	yes	no	2	0.0035173	47.666	97917000	0	97917000	0	503110000
TRHTLEKR	8	2	1039.59	O54724	O54724	268	275	Ptrf	Polymerase I and transcript release factor	yes	yes	3	0.0056111	47.603	0	0	0	0	0
MMLGAEGGEGFVVK	14	0	1423.68	Q8C2Q7;O35737	Q8C2Q7	1	14	Hnrnph1	Heterogeneous nuclear ribonucleoprotein H;Heterogeneous nuclear ribonucleoprotein H, N-terminally processed	yes	no	2	0.0087846	47.302	2026100	2026100	0	2026100	0
ELEDPEFAAAETLDR	15	0	1704.78	A0A2R8VJN7;A0A2R8W6T4;A0A2R8W6M8;Q8K1N4	A0A2R8VJN7	128	142	Spats2	Spermatogenesis-associated serine-rich protein 2	yes	no	2	0.013312	47.288	1755200	1755200	0	1755200	0
VEAGDVIYIEANSGAVKR	18	1	1889.98	P60122	P60122	185	202	Ruvbl1	RuvB-like 1	yes	yes	3	0.0030679	47.09	5478600	5478600	0	5478600	0
TIVFVETK	8	0	935.533	S4R1I6;Q8BTS0;Q61656	S4R1I6	344	351	Ddx5	Probable ATP-dependent RNA helicase DDX5	yes	no	1	0.018626	47.082	2617800	2617800	0	2617800	0
SYGRPPPDVEGMTSLK	16	1	1732.85	Q62093	Q62093	2	17	Srsf2	Serine/arginine-rich splicing factor 2	yes	yes	2	0.0043307	47.062	6272400	6272400	0	6272400	0
AYRVLGR	7	1	833.487	Q673U1	Q673U1	2	8	Hs3st2	Heparan sulfate glucosamine 3-O-sulfotransferase 2	yes	yes	2	0.018194	47.045	128100000	0	128100000	0	658190000
ATEGDVELELETETSGPERPPEKPR	25	2	2765.34	Q9CR41	Q9CR41	2	26	Hypk	Huntingtin-interacting protein K	yes	yes	3	0.00012637	46.982	5021600	5021600	0	5021600	0
TKVTVLEGDILDAQCLRR	18	2	2086.12	P24815	P24815	54	71	Hsd3b1	3 beta-hydroxysteroid dehydrogenase/Delta 5-->4-isomerase type 1;3-beta-hydroxy-Delta(5)-steroid dehydrogenase;Steroid Delta-isomerase	yes	yes	4	0.0081281	46.892	1027300	1027300	0	1027300	0
ASGADSKGDDLSTAILK	17	1	1647.83	Q01853	Q01853	2	18	Vcp	Transitional endoplasmic reticulum ATPase	yes	yes	2;3	0.0029437	46.592	52893000	52893000	0	52893000	0
TLEPICDADPSALAK	15	0	1599.78	E9PUF4;E9Q640;E9PYZ7;Q6NZN0	E9PUF4	20	34	Rbm26	RNA-binding protein 26	yes	no	2	0.013793	46.592	3429200	3429200	0	3429200	0
KSEIEYYAMLAK	12	1	1444.73	A0A2I3BQF4;P62889	A0A2I3BQF4	36	47	Rpl30	60S ribosomal protein L30	yes	no	2	0.01913	46.462	6748300	6748300	0	6748300	0
STVHEILCK	9	0	1085.55	B0V2N8;B0V2N7;P07356	B0V2N8	2	10	Anxa2	Annexin;Annexin A2	yes	no	2	0.019132	46.426	883880	883880	0	883880	0
VHEIFKR	7	1	927.529	A0A0R4J0V5;P08775	A0A0R4J0V5	221	227	Polr2a	DNA-directed RNA polymerase II subunit RPB1	yes	no	3	0.016941	46.426	536650	536650	0	536650	0
ELTAEVYRLQDEMK	14	1	1723.85	A0A1Y7VNC5;Q61043	A0A1Y7VNC5	1270	1283	Nin	Ninein	yes	no	2	0.016413	46.406	37878000	0	37878000	0	194620000
GRELPTAFDYVEFTR	15	1	1799.88	A3KGU5;A3KGU7;E9Q447;A3KGU9;P16546	A3KGU5	2438	2452	Sptan1	Spectrin alpha chain, non-erythrocytic 1	yes	no	3	0.011313	46.319	3061200	3061200	0	3061200	0
KLIYTVVGR	9	1	1047.64	Q91ZV4	Q91ZV4	279	287	Mogat1	2-acylglycerol O-acyltransferase 1	yes	yes	3	0.0083792	46.158	100120000	0	100120000	0	514400000
ALIAGGGAPEIELALR	16	0	1549.88	G5E839;P80315	G5E839	390	405	Cct4	T-complex protein 1 subunit delta	yes	no	2	0.014016	45.915	11894000	11894000	0	11894000	0
LIVAYVDDLDRR	12	1	1446.78	Q8CGF7	Q8CGF7	1072	1083	Tcerg1	Transcription elongation regulator 1	yes	yes	3	0.0072159	45.915	5342300	5342300	0	5342300	0
SSYYVVSGNDPAAEEPSR	18	0	1926.86	P14873	P14873	2378	2395	Map1b	Microtubule-associated protein 1B;MAP1B heavy chain;MAP1 light chain LC1	yes	yes	2	0.012155	45.915	3106000	3106000	0	3106000	0
ADKEAAFDDAVEER	14	1	1564.7	Q60972	Q60972	2	15	Rbbp4	Histone-binding protein RBBP4	yes	yes	2	0.0071192	45.879	5752300	5752300	0	5752300	0
IKEIIALKPEGDAK	14	2	1523.89	E9QP46;Q6ZWQ0	E9QP46	2074	2087	Syne2	Nesprin-2	yes	no	3	0.017447	45.33	1051800	1051800	0	1051800	0
LGVYDADGDGDFDVDDAK	18	0	1885.79	Q8CBM2;A2AL85;Q8BSY0;A2AL71;A2AL77;A2AL83;A2AL79;Q9CR06;A2AL74;A2AL78;A2AL76;A2AL75;Q3TU40;A2AL81	Q8CBM2	29	46	Asph	Aspartyl/asparaginyl beta-hydroxylase	yes	no	2	0.012391	45.257	4721600	4721600	0	4721600	0
ADAAASPVGKR	11	1	1041.56	Q3UI14;A0A286YDJ6;Q6ZPY7	Q3UI14	2	12	Kdm3b	Lysine-specific demethylase 3B	yes	no	2	0.0049369	45.161	0	0	0	0	0
LGISFLEDLSDR	12	0	1363.7	D3Z1Y7;Q8BW24;F6Z595;Q3LR78	D3Z1Y7	114	125	Zbtb38		yes	no	1	0.017181	45.137	27190000	0	27190000	0	139700000
SVGDGETVEFDVVEGEK	17	0	1794.82	A0A0A0MQD2;B2RUF0;P62960;Q9Z2C8;Q9JKB3	A0A0A0MQD2	61	77	Ybx2;Ybx1;Ybx3	Nuclease-sensitive element-binding protein 1;Y-box-binding protein 2;Y-box-binding protein 3	yes	no	2	8.4125e-05	45.115	0	0	0	0	0
ALVAIGTHDLDTLSGPFTYTAK	22	0	2290.18	Q9WUA2;A0A087WPV4	Q9WUA2	155	176	Farsb	Phenylalanine--tRNA ligase beta subunit	yes	no	3	0.011936	45.047	7674900	7674900	0	7674900	0
RGGPPFAFVEFEDPRDAEDAVYGR	24	2	2696.26	H7BX95;Q6PDM2	H7BX95	51	74	Srsf1	Serine/arginine-rich splicing factor 1	yes	no	4	0.00046879	44.953	9424300	9424300	0	9424300	0
FVKEPAFEDITLESER	16	1	1908.95	A0A1B0GRU8;A0A6Q6PUT5;Q9R1C7	A0A1B0GRU8	743	758	Prpf40a	Pre-mRNA-processing factor 40 homolog A	yes	no	3	0.013909	44.734	15723000	15723000	0	15723000	0
RYEEIVK	7	1	935.508	P10126;D3YZ68;D3Z3I8	P10126	166	172	Eef1a1	Elongation factor 1-alpha 1	yes	no	3	0.015829	44.447	1297800	1297800	0	1297800	0
TMMSFKER	8	1	1028.48	B1AYB5;B1AYB6	B1AYB5	1506	1513	Mbd5	Methyl-CpG-binding domain protein 5	yes	no	3	0.011463	44.395	2165000	0	2165000	0	11124000
LAVEALSSLDGDLSGR	16	0	1601.83	Q04447	Q04447	157	172	Ckb	Creatine kinase B-type	yes	yes	2	0.01827	44.299	3037000	3037000	0	3037000	0
SEVPGIFCAGADLKER	16	1	1747.86	A0A0R4J1L8;F6R307;F6RT60;A0A0R4J023;Q9JLZ3	A0A0R4J1L8	106	121	Auh	Methylglutaconyl-CoA hydratase, mitochondrial	yes	no	3	0.013834	44.294	3024000	3024000	0	3024000	0
MDGIVPDIAVGTKR	14	1	1470.79	E9Q279;E9QMW9;Q8CB58;Q8BGJ5;Q922I7;P17225	E9Q279	1	14	Ptbp1	Polypyrimidine tract-binding protein 1	yes	no	2	0.0051865	44.188	2213500	2213500	0	2213500	0
ADIEVACYGYEGIDAVK	17	0	1871.86	Q6ZWX6	Q6ZWX6	193	209	Eif2s1	Eukaryotic translation initiation factor 2 subunit 1	yes	yes	2	0.00011319	43.991	0	0	0	0	0
KVTSVVFHPSQELVFSASPDATIR	24	1	2614.38	Q99KP6	Q99KP6	266	289	Prpf19	Pre-mRNA-processing factor 19	yes	yes	3	0.00016996	43.888	7963300	7963300	0	7963300	0
GIEKPPFELPDFIKR	15	2	1784.98	Q3UJB0	Q3UJB0	499	513	Sf3b2		yes	yes	4	0.017375	43.791	5760500	5760500	0	5760500	0
SEAAPAAPAAAPPAEK	16	0	1447.73	P15864	P15864	2	17	Hist1h1c	Histone H1.2	yes	yes	2	0.0083707	43.549	9180700	9180700	0	9180700	0
ELAINLVTKGFNK	13	1	1445.82	Q8BVR0	Q8BVR0	30	42	Banf2	Barrier-to-autointegration factor-like protein	yes	yes	3	0.022477	43.544	40813000	0	40813000	0	209700000
STSETTEEAFSSSVR	15	0	1616.72	Q8CAQ8	Q8CAQ8	180	194	Immt	MICOS complex subunit Mic60	yes	yes	2	0.020172	43.544	2996700	2996700	0	2996700	0
GTEITHAVVIKK	12	1	1294.76	Q8R1B4	Q8R1B4	319	330	Eif3c	Eukaryotic translation initiation factor 3 subunit C	yes	yes	3	0.006	43.501	10132000	10132000	0	10132000	0
AVIGIGIEEEDRK	13	1	1427.76	Q91YR7	Q91YR7	528	540	Prpf6	Pre-mRNA-processing factor 6	yes	yes	3	0.0055135	43.297	1320600	1320600	0	1320600	0
ASLVPLKEK	9	1	983.602	P56135	P56135	2	10	Atp5j2	ATP synthase subunit f, mitochondrial	yes	yes	2	0.016509	43.083	50542000	50542000	0	50542000	0
SAASGIPYHSEVPVSLK	17	0	1740.9	Q62261	Q62261	2241	2257	Sptbn1	Spectrin beta chain, non-erythrocytic 1	yes	yes	3	0.018278	42.813	12457000	12457000	0	12457000	0
AAEGASDPAGLSEGSGR	17	0	1530.69	Q6P5D8	Q6P5D8	2	18	Smchd1	Structural maintenance of chromosomes flexible hinge domain-containing protein 1	yes	yes	2	0.0072402	42.809	2561300	2561300	0	2561300	0
AEIAASRTSHSRAK	14	2	1483.79	Q9ET77	Q9ET77	381	394	Jph3	Junctophilin-3	yes	yes	2	0.022327	42.743	70927000	0	70927000	0	364430000
QEISQRLRIYHSS	13	2	1615.84	Q80ZI6	Q80ZI6	715	727	Lrsam1	E3 ubiquitin-protein ligase LRSAM1	yes	yes	2	0.010908	42.743	0	0	0	0	0
IIAPPERK	8	1	922.56	P63260;P60710;E9Q1F2;P63268;P68134;P68033;P62737;B1ATY1;Q8BFZ3	P63260	329	336	Actg1;Actb;Actg2;Acta1;Actc1;Acta2;Actbl2	Actin, cytoplasmic 2;Actin, cytoplasmic 2, N-terminally processed;Actin, cytoplasmic 1;Actin, cytoplasmic 1, N-terminally processed;Actin, gamma-enteric smooth muscle;Actin, alpha skeletal muscle;Actin, alpha cardiac muscle 1;Actin, aortic smooth muscle;Beta-actin-like protein 2	yes	no	3	0.0154	42.599	2844900	2844900	0	2844900	0
LGGSLADSYLDEGFLLDKK	19	1	2040.04	P80314	P80314	205	223	Cct2	T-complex protein 1 subunit beta	yes	yes	3	0.002859	42.529	19936000	19936000	0	19936000	0
HLITLSNSTFTFSYK	15	0	1757.9	P24815	P24815	318	332	Hsd3b1	3 beta-hydroxysteroid dehydrogenase/Delta 5-->4-isomerase type 1;3-beta-hydroxy-Delta(5)-steroid dehydrogenase;Steroid Delta-isomerase	yes	yes	3	0.0045327	42.52	0	0	0	0	0
SSVLEVEKR	9	1	1045.58	A0A571BGD8;A6H644;Q8BG95	A0A571BGD8	133	141	Ppp1r12b	Protein phosphatase 1 regulatory subunit;Protein phosphatase 1 regulatory subunit 12B	yes	no	3	0.014842	42.395	2612100	2612100	0	2612100	0
GEPETFLPLDYLEVKPTDEKLR	22	2	2588.34	Q9CU62	Q9CU62	565	586	Smc1a	Structural maintenance of chromosomes protein 1A	yes	yes	3	0.015654	42.325	12366000	12366000	0	12366000	0
SLEEGEGPIAVIMTPTR	17	0	1798.91	F8WHR6;Q569Z5	F8WHR6	439	455	Ddx46	Probable ATP-dependent RNA helicase DDX46	yes	no	2	0.0016008	42.095	0	0	0	0	0
SSGLPITSAVDLEDAAK	17	0	1672.85	Q9Z2I8	Q9Z2I8	408	424	Suclg2	Succinyl-CoA ligase [GDP-forming] subunit beta, mitochondrial	yes	yes	2	0.016993	42.041	4466400	4466400	0	4466400	0
YYEAADTVTQFDNVR	15	0	1790.81	A0A1W2P6N7;Q3UID0;Q6PDG5	A0A1W2P6N7	14	28	Smarcc2	SWI/SNF complex subunit SMARCC2	yes	no	2	0.017014	42.001	0	0	0	0	0
RHPDYSVSLLLR	12	1	1454.8	P07724	P07724	361	372	Alb	Serum albumin	yes	yes	3	0.013494	41.644	1521900	1521900	0	1521900	0
YDFGIYDDDPEIITLERR	18	1	2229.06	Q9DC23	Q9DC23	120	137	Dnajc10	DnaJ homolog subfamily C member 10	yes	yes	3	0.0039161	41.554	4792300	4792300	0	4792300	0
MVNEYKR	7	1	938.464	E9QL87;A0A0A6YXV9;A0A0R4J1R5;E9PVL3;P0DOV1;P0DOV2;Q504N7;Q8BV49	E9QL87	1	7	BC094916;Pyhin1	Pyrin and HIN domain-containing protein 1-like;Pyrin and HIN domain-containing protein 1	yes	no	3	0.01363	41.502	2075500	0	2075500	0	10664000
MNVLADALK	9	0	973.527	D3YVB4;D3Z712;F8WJ41;P62245	D3YVB4	4	12	Rps15a	40S ribosomal protein S15a	yes	no	2	0.01758	41.448	0	0	0	0	0
RLAQDGAHVVISSRK	15	2	1635.92	Q149L0	Q149L0	56	70	Dhrs2		yes	yes	2	0.016669	41.283	29801000	0	29801000	0	153120000
DSYVGDEAQSKR	12	1	1353.62	P63260;P60710;E9Q5F4;P63268;P68134;P68033;P62737;G3UZ07;G3UYG0;E9Q606;A0A1D5RM20;D3Z2K3;A0A494B9T3;D3YZY0	P63260	51	62	Actg1;Actb;Actg2;Acta1;Actc1;Acta2	Actin, cytoplasmic 2;Actin, cytoplasmic 2, N-terminally processed;Actin, cytoplasmic 1;Actin, cytoplasmic 1, N-terminally processed;Actin, gamma-enteric smooth muscle;Actin, alpha skeletal muscle;Actin, alpha cardiac muscle 1;Actin, aortic smooth muscle	yes	no	3	0.014246	41.242	740190	740190	0	740190	0
GPPDFSSDEEREPTPVLGSGASVGR	25	1	2542.19	Q61029;Q61033	Q61029	61	85	Tmpo	Lamina-associated polypeptide 2, isoforms beta/delta/epsilon/gamma;Lamina-associated polypeptide 2, isoforms alpha/zeta	yes	no	3	0.0026903	40.937	6832400	6832400	0	6832400	0
PAGSKAK	7	1	657.381	Q3UHC2	Q3UHC2	683	689	Lrrk1	Leucine-rich repeat serine/threonine-protein kinase 1	yes	yes	1	0.018856	40.921	4799500	0	4799500	0	24660000
GCGVVKFESPEVAER	15	1	1662.8	Q9D0E1	Q9D0E1	692	706	Hnrnpm	Heterogeneous nuclear ribonucleoprotein M	yes	yes	3	0.016102	40.801	1033800	1033800	0	1033800	0
QASISELKR	9	1	1030.58	A0A1W2P8C0	A0A1W2P8C0	1	9			yes	yes	3	0.0048687	40.724	17112000	0	0	0	0
ALVPTPGKK	9	1	909.565	P09405	P09405	117	125	Ncl	Nucleolin	yes	yes	3	0.010557	40.724	2695400	2695400	0	2695400	0
YYPTEDVPRK	10	1	1266.62	P47911	P47911	123	132	Rpl6	60S ribosomal protein L6	yes	yes	3	0.0088617	40.589	2273200	2273200	0	2273200	0
STLGPPDPPLWEKNSQR	17	1	1920.97	Q0ZCJ7	Q0ZCJ7	120	136	Mamstr	MEF2-activating motif and SAP domain-containing transcriptional regulator	yes	yes	2	0.014673	40.577	8822700	0	8822700	0	45332000
FAYDGLKR	8	1	968.508	Q91VD9	Q91VD9	292	299	Ndufs1	NADH-ubiquinone oxidoreductase 75 kDa subunit, mitochondrial	yes	yes	3	0.018051	40.002	2047000	2047000	0	2047000	0
CLQAGMNLGGFK	12	0	1294.62	D3Z473	D3Z473	663	674	Nr3c2		yes	yes	2	0.01519	40.002	759690	0	759690	0	3903300
ITDTIGPTETSIAPR	15	0	1570.82	Q91Z96	Q91Z96	354	368	Bmp2k	BMP-2-inducible protein kinase	yes	yes	2	0.020629	39.918	0	0	0	0	0
LSPVAEEFRDR	11	1	1317.67	Q00623	Q00623	164	174	Apoa1	Apolipoprotein A-I;Proapolipoprotein A-I;Truncated apolipoprotein A-I	yes	yes	3	0.019067	39.917	2357500	2357500	0	2357500	0
LLLSTSLDAKDELEERLER	19	2	2229.19	A0A0G2JFJ6;Q7TPD0	A0A0G2JFJ6	35	53	Ints3	Integrator complex subunit 3	yes	no	4	0.0083586	39.657	2532500	2532500	0	2532500	0
KLFIGGLSFETTDDSLREHFEK	22	2	2568.29	A2AL12;Q8BG05	A2AL12	36	57	Hnrnpa3	Heterogeneous nuclear ribonucleoprotein A3	yes	no	4	0.0056137	39.276	14907000	14907000	0	14907000	0
YLHDESGLNRR	11	1	1358.67	D3Z1S1;F6WYM0;D3YYB1;D3Z3C0;P42208;F6UKN5;E9Q3V6	D3Z1S1	159	169	Sept2	Septin-2	yes	no	3	0.017535	39.266	1370300	1370300	0	1370300	0
AVKDELLSEKPEVK	14	2	1583.88	B1AUB6;B1AUB8;B1AUB9;B1AUC0;Q02780	B1AUB6	47	60	Nfia	Nuclear factor 1;Nuclear factor 1 A-type	yes	no	4	0.011646	39.005	8628800	8628800	0	8628800	0
GYGFVSFKDPSDYVR	15	1	1735.82	D3YYW8;Q91V81	D3YYW8	392	406	Rbm42	RNA-binding protein 42	yes	no	3	0.020619	39.005	2335100	2335100	0	2335100	0
AYLFAHVADFVPSEESDLVGTLK	23	0	2507.26	Q5SWD9	Q5SWD9	251	273	Tsr1	Pre-rRNA-processing protein TSR1 homolog	yes	yes	3	0.00020441	38.933	9279500	9279500	0	9279500	0
IIFPAAEDKDQDLITIIGKEDAVR	24	2	2669.43	Q8VDJ3;A0A087WP83	Q8VDJ3	761	784	Hdlbp	Vigilin	yes	no	4	0.001838	38.933	6839900	6839900	0	6839900	0
GLVAVVTGGASGLGLATAKR	20	1	1797.05	Q99N15;A2AFQ2	Q99N15	10	29	Hsd17b10		yes	no	3	0.0045115	38.915	2217800	2217800	0	2217800	0
IKGEHPGLSIGDVAKK	16	2	1647.93	A0A0J9YUZ4;P63158;A0A0J9YUD8	A0A0J9YUZ4	127	142	Hmgb1	High mobility group protein B1	yes	no	4	0.020587	38.889	159930000	159930000	0	159930000	0
VRVELSNGEKR	11	2	1285.71	P84104	P84104	76	86	Srsf3	Serine/arginine-rich splicing factor 3	yes	yes	4	0.01797	38.783	1182500	1182500	0	1182500	0
RLGGGLGGTR	10	1	942.536	Q62376;A0A1B0GSX5;A0A1B0GR50	Q62376	191	200	Snrnp70	U1 small nuclear ribonucleoprotein 70 kDa	yes	no	3	0.0085351	37.696	967530	967530	0	967530	0
KTGSYGALAEISASK	15	1	1481.77	Q9DBR7	Q9DBR7	442	456	Ppp1r12a	Protein phosphatase 1 regulatory subunit 12A	yes	yes	3	0.0031602	37.583	1077200	1077200	0	1077200	0
SSGLSTPVAPSAGHLAHVR	19	0	1842.97	Q8BX02	Q8BX02	173	191	Kank2	KN motif and ankyrin repeat domain-containing protein 2	yes	yes	4	0.0066235	37.237	5956700	5956700	0	5956700	0
LRPSGDDVELIGEEEDVSVYDIADHPDFR	29	1	3286.53	Q6ZPJ3	Q6ZPJ3	619	647	Ube2o	E2/E3 hybrid ubiquitin-protein ligase UBE2O	yes	yes	4	1.2038e-08	37.21	4286500	4286500	0	4286500	0
LDIQDKDGDTPLHEALR	17	1	1934.97	F6ZBL2;Q80SY4	F6ZBL2	327	343	Mib1	E3 ubiquitin-protein ligase MIB1	yes	no	3	0.021933	37.177	8104600	0	8104600	0	41642000
QYEKAEELYERALDIR	16	2	2025.02	H9KV07;Q7TNH6	H9KV07	1025	1040	Nphp3	Nephrocystin-3	yes	no	4	0.013361	37.092	18075000	0	18075000	0	92869000
ELEFYLRK	8	1	1096.59	P62242	P62242	194	201	Rps8	40S ribosomal protein S8	yes	yes	3	0.021114	36.395	2635800	2635800	0	2635800	0
MEVLTDKEGWILIDR	15	1	1816.94	O70479	O70479	61	75	Tnfaip1	BTB/POZ domain-containing adapter for CUL3-mediated RhoA degradation protein 2	yes	yes	3;4	0.013032	36.392	462540000	0	462540000	0	2376600000
HPDASVNFSEFSKK	14	1	1591.76	A0A0J9YUZ4;P63158;A0A0J9YUD8;D3YZ18;D3YVC6	A0A0J9YUZ4	45	58	Hmgb1	High mobility group protein B1	yes	no	3	0.0048085	35.891	51210000	51210000	0	51210000	0
FKELVNAVATVR	12	1	1345.77	Q8C0J6	Q8C0J6	50	61	Sowahc	Ankyrin repeat domain-containing protein SOWAHC	yes	yes	4	0.020593	35.645	1625200	0	1625200	0	8350200
KLFIGGLSFETTEESLR	17	1	1926.01	O88569	O88569	22	38	Hnrnpa2b1	Heterogeneous nuclear ribonucleoproteins A2/B1	yes	yes	3	0.0099301	35.64	10573000	10573000	0	10573000	0
YTVGGSETFDSLTDLVEHFKK	21	1	2372.15	P29351	P29351	176	196	Ptpn6	Tyrosine-protein phosphatase non-receptor type 6	yes	yes	3;4	0.0041901	35.174	18948000	18948000	0	18948000	0
VLEDSDLKKSDIDEIVLVGGSTR	23	2	2487.31	P20029	P20029	346	368	Hspa5	78 kDa glucose-regulated protein	yes	yes	3	0.0094609	35.174	8468100	8468100	0	8468100	0
RGNMGHLTR	9	1	1040.53	G3X9K4;A0A5F8MQ25;Q8R3Q2	G3X9K4	476	484	Ppp6r2	Serine/threonine-protein phosphatase 6 regulatory subunit 2	yes	no	3	0.01574	34.387	14449000	0	14449000	0	74240000
APKPEDIDEEDDDVPDLVENFDEASKNEAN	30	2	3358.45	Q9CQH7	Q9CQH7	129	158	Btf3l4	Transcription factor BTF3 homolog 4	yes	yes	3	2.4443e-05	34.236	11043000	11043000	0	11043000	0
CLELFTELAEDKENYKK	17	2	2129.04	P07901	P07901	421	437	Hsp90aa1	Heat shock protein HSP 90-alpha	yes	yes	4	0.010648	33.947	1325500	1325500	0	1325500	0
LAKARGPR	8	2	867.54	F6UFI2;A0A2K6EDL8;Q923P0	F6UFI2	1011	1018	Col20a1	Collagen alpha-1(XX) chain	yes	no	1	0.021614	33.738	7491600	0	7491600	0	38492000
VIFHPEFLSSTSPLLPVDYEEFVR	24	0	2820.44	A0A1B0GT92;Q9Z1E4	A0A1B0GT92	411	434	Gys1	Glycogen [starch] synthase, muscle	yes	no	3	0.011701	33.425	2997400	2997400	0	2997400	0
RTEEGPTLSYGR	12	1	1364.67	Q8K310;A0A494BAZ2	Q8K310	149	160	Matr3	Matrin-3	yes	no	3	0.016305	33.192	1300200	1300200	0	1300200	0
LAEKFPVISVPHLPEK	16	1	1803.03	Q8C788;Q91ZR2	Q8C788	314	329	Snx18	Sorting nexin;Sorting nexin-18	yes	no	4	0.015874	32.995	7521600	7521600	0	7521600	0
ESIESEIRR	9	1	1117.57	Q01853	Q01853	701	709	Vcp	Transitional endoplasmic reticulum ATPase	yes	yes	3	0.018991	32.415	2909700	2909700	0	2909700	0
IFYPETTDVYDRK	13	1	1645.8	Q3UQ44	Q3UQ44	128	140	Iqgap2	Ras GTPase-activating-like protein IQGAP2	yes	yes	3	0.015262	32.275	1748300	1748300	0	1748300	0
EFLLSLDDSVDETEAVKR	18	1	2065.02	Q99MR6;A0A0G2JDN3;A0A1Y7VNN4	Q99MR6	154	171	Srrt	Serrate RNA effector molecule homolog	yes	no	3	0.013175	32.181	11807000	11807000	0	11807000	0
SFKPDFGAESIYGGFLLGVR	20	1	2159.11	O55029	O55029	423	442	Copb2	Coatomer subunit beta	yes	yes	3	0.01729	32.121	6234400	6234400	0	6234400	0
KALAAAGYDVEK	12	1	1234.66	P15864;I7HFT9;Q07133;P43274;P43277	P43274	64	75	Hist1h1c;Hist1h1t;Hist1h1e;Hist1h1d	Histone H1.2;Histone H1t;Histone H1.4;Histone H1.3	no	no	3	0.015641	32.068	1314800	1314800	0	1314800	0
KLFIGGLSFETTDESLR	17	1	1911.99	Q5EBP8;P49312	Q5EBP8	15	31	Hnrnpa1	Heterogeneous nuclear ribonucleoprotein A1;Heterogeneous nuclear ribonucleoprotein A1, N-terminally processed	yes	no	3	0.014339	31.883	5692500	5692500	0	5692500	0
GNKYLAK	7	1	792.449	O55134	O55134	982	988	Pcdh12	Protocadherin-12	yes	yes	1	0.022154	31.579	7104900	0	7104900	0	36506000
KLEAAATALATK	12	1	1186.69	Q9D8E6	Q9D8E6	353	364	Rpl4	60S ribosomal protein L4	yes	yes	3	0.018164	31.526	3009900	3009900	0	3009900	0
TTHFVEGGDAGNREDQINR	19	1	2114.97	P14148	P14148	246	264	Rpl7	60S ribosomal protein L7	yes	yes	4	0.016612	31.462	622430	622430	0	622430	0
QRSATSDLELR	11	1	1274.66	A0A087WSE3;E9QQ25;Q62407	A0A087WSE3	236	246	Speg	Striated muscle-specific serine/threonine-protein kinase	yes	no	4	0.019217	31.431	5375500	0	5375500	0	27620000
NVDVEFFKR	9	1	1152.59	P14873	P14873	2367	2375	Map1b	Microtubule-associated protein 1B;MAP1B heavy chain;MAP1 light chain LC1	yes	yes	3	0.02091	31.422	1485600	1485600	0	1485600	0
VIHLSNLPHSGYSDSAVLK	19	0	2036.07	Q8K310;A0A494BAZ7;A0A494BAD4;A0A494B9X1	Q8K310	497	515	Matr3	Matrin-3	yes	no	4	0.012723	30.956	1422700	1422700	0	1422700	0
MSFRDLR	7	1	923.465	F6TQ80;Q8R3P7	F6TQ80	1	7	Cluap1	Clusterin-associated protein 1	yes	no	1	0.02277	30.669	7011400	0	7011400	0	36025000
LRITNIDQVALNSLK	15	1	1696.98	E9Q2J8;Q8BUG5	E9Q2J8	368	382	Caps2	Calcyphosin-2	yes	no	4;5	0.0096571	30.483	283610000	0	283610000	0	1457200000
EEYTFAVETLPR	12	0	1453.71	Q61098	Q61098	388	399	Il18r1	Interleukin-18 receptor 1	yes	yes	4	0.019584	29.807	1566700	0	1566700	0	8050100
QTVAVGVIKNVEKK	14	2	1511.9	P62631	P62631	431	444	Eef1a2	Elongation factor 1-alpha 2	yes	yes	3	0.021513	29.491	0	0	0	0	0
EKPKHEHK	8	2	1031.55	Q8R0F5	Q8R0F5	248	255	Rbmx2	RNA-binding motif protein, X-linked 2	yes	yes	1	0.020831	29.376	51424000	0	51424000	0	264220000
DGTVTAGNASGVSDGAGAVIIASEDAVKK	29	1	2659.33	Q8BWT1	Q8BWT1	242	270	Acaa2	3-ketoacyl-CoA thiolase, mitochondrial	yes	yes	3	0.010555	29.346	13813000	13813000	0	13813000	0
TLKQSQPK	8	1	928.534	A0A140LIV4;F6YMQ0;F6Z0V3;Q3UVV9	A0A140LIV4	66	73	Vwa3a	von Willebrand factor A domain-containing protein 3A	yes	no	1	0.022216	29.338	1578400	1578400	0	1578400	0
RAPGDQGEKYIDLR	14	2	1616.83	Q8R2Y2	Q8R2Y2	634	647	Mcam	Cell surface glycoprotein MUC18	yes	yes	3	0.01528	28.632	0	0	0	0	0
IFHTVTTTDDPVIRK	15	1	1741.94	O70194	O70194	223	237	Eif3d	Eukaryotic translation initiation factor 3 subunit D	yes	yes	3	0.021497	28.546	4538700	4538700	0	4538700	0
AQTLPTSVVTITSESSPGKR	20	1	2058.1	Q62261	Q62261	2325	2344	Sptbn1	Spectrin beta chain, non-erythrocytic 1	yes	yes	3	0.015775	28.412	3324600	3324600	0	3324600	0
SLEDAAEYIHKAEHER	16	1	1896.9	A0A2I3BPY7;Q9EP71	A0A2I3BPY7	638	653	Rai14	Ankycorbin	yes	no	3	0.012781	28.212	0	0	0	0	0
GLVKEALEFLGRALQK	16	2	1771.04	E9PXF7;D3Z6F0	E9PXF7	263	278	Gm14446		yes	no	4	0.019227	28.089	484160000	0	484160000	0	2487700000
DPIPYLPPLEKLPHEK	16	1	1885.03	Q62376;A0A1B0GRR8;A0A1B0GR69;A0A1B0GRV8	Q62376	17	32	Snrnp70	U1 small nuclear ribonucleoprotein 70 kDa	yes	no	4	0.010458	27.85	2121500	2121500	0	2121500	0
HYNGEAYEDDEHHPR	15	0	1867.75	P63037	P63037	375	389	Dnaja1	DnaJ homolog subfamily A member 1	yes	yes	4	0.0097437	27.767	1012200	1012200	0	1012200	0
LTLQNDKRENVLK	13	2	1569.88	D3Z7J3;Q9DCW2	D3Z7J3	80	92	Plscr2	Phospholipid scramblase 2	yes	no	4	0.016927	27.681	9341400	0	9341400	0	47997000
GKGTVAAAASGAAGGGGGGAGAGAPGGGR	29	1	2124.04	A0A0G2JFJ6;Q7TPD0	A0A0G2JFJ6	6	34	Ints3	Integrator complex subunit 3	yes	no	3	0.0016697	27.638	14821000	14821000	0	14821000	0
TLTGKEIEIDIEPTDK	16	1	1800.94	P29595	P29595	7	22	Nedd8	NEDD8	yes	yes	3;4	0.011875	27.496	56408000	0	56408000	0	289830000
SLAPSIHGHDYVKK	14	1	1550.82	P25206	P25206	302	315	Mcm3	DNA replication licensing factor MCM3	yes	yes	3	0.021482	27.335	1780500	1780500	0	1780500	0
LPETSLFETEETRK	14	1	1678.84	Q8R2P8;Q99MN1	Q8R2P8	435	448	Kars	Lysine--tRNA ligase	yes	no	3	0.021735	27.029	11687000	11687000	0	11687000	0
TTGFGMIYDSLDYAKK	16	1	1808.87	A0A286YEB7;P62849	A0A286YEB7	57	72	Rps24	40S ribosomal protein S24	yes	no	3	0.013139	26.808	3029600	3029600	0	3029600	0
KHPSLIPLFVFIGAGGTGAALYVMR	25	1	2614.45	Q62425	Q62425	11	35	Ndufa4	Cytochrome c oxidase subunit NDUFA4	yes	yes	4	0.019555	25.157	8166300	8166300	0	8166300	0
AASIFGGAKPVDTAAR	16	1	1530.82	B2RWE8;Q8BGD9	B2RWE8	357	372	Eif4b	Eukaryotic translation initiation factor 4B	yes	no	3	0.020502	25.054	0	0	0	0	0
GPPPPPTASEPTRR	14	1	1458.76	Q8CGF7	Q8CGF7	1084	1097	Tcerg1	Transcription elongation regulator 1	yes	yes	3	0.021581	24.935	1085800	1085800	0	1085800	0
LFKDQLVYPLLAFTR	15	1	1823.03	Q3UGI9;Q3UD93;Q3U7U3	Q3UGI9	227	241	Fbxo7	F-box only protein 7	yes	no	4	0.01462	24.191	1355200	0	1355200	0	6963400
KGTPASATGASTSSHCK	17	1	1646.77	F6R3V4;H3BIX0;H3BL37;O08784	F6R3V4	565	581	Tcof1	Treacle protein	yes	no	3	0.013363	23.33	1214300	1214300	0	1214300	0
RIVSQLLTLMDGLK	14	1	1585.92	Q01853	Q01853	323	336	Vcp	Transitional endoplasmic reticulum ATPase	yes	yes	4	0.013803	20.806	235710000	0	229280000	0	1178000000
LAQQVCLAIANISDRR	16	1	1826.98	A0A0R4J0H7;Q8K2Z4	A0A0R4J0H7	801	816	Ncapd2	Condensin complex subunit 1	yes	no	3	0.017107	20.737	22515000	0	22515000	0	115680000
NITVAYKFHVGSYGDTGHLFTESCSISPK	29	1	3214.54	E9Q137	E9Q137	45	73	Tex264		yes	yes	4	0.013347	18.356	220300000	0	220300000	0	1131900000
FDFLLLVCCAMLILIR	16	0	1996.07	Q8R3D1	Q8R3D1	348	363	Tbc1d13	TBC1 domain family member 13	yes	yes	6	0.018551	17.917	2840900	0	2840900	0	14597000
QKLLQAQLEEQLQAKLLR	18	2	2149.26	Q8CJ40	Q8CJ40	362	379	Crocc	Rootletin	yes	yes	7	0.021488	16.306	340610	0	340610	0	1750100
NTKRGSWYIEALTQVFSER	19	2	2284.16	P29594	P29594	379	397	Casp2	Caspase-2;Caspase-2 subunit p18;Caspase-2 subunit p13;Caspase-2 subunit p12	yes	yes	6	0.021988	15.592	775540	0	775540	0	3984800
IVNYTPDLPRQSVDSAIEK	19	1	2144.11	Q922W6;O55123;P28862	Q922W6	120	138	Mmp3;Mmp10	Stromelysin-2;Stromelysin-1	yes	no	5	0.02109	15.422	23407000	23407000	0	23407000	0
VGRQAVIYRWNDIGSVTHSK	20	2	2285.2	A0A0R4J080;Q62130	A0A0R4J080	245	264	Ptpn14	Tyrosine-protein phosphatase non-receptor type 14	yes	no	6	0.020458	15.09	177910	177910	0	177910	0
SQYPEIVFLGTGSAIPMKIR	20	1	2206.18	B1ATP7;Q80Y81	B1ATP7	473	492	Elac2	Zinc phosphodiesterase ELAC protein 2	yes	no	7	0.019627	14.928	79742	0	0	0	0
IESLMDEIEFLKKLHEEELR	20	2	2500.29	G5E846;A0A2R8W6R6;G3X981;P15331	G5E846	222	241	Prph	Peripherin	yes	no	6	0.020376	14.77	473260	473260	0	473260	0
VTIDLQVTMPHNYPYVALQLFGR	23	0	2674.39	Q14BN8;Q9D9S3	Q14BN8	68	90	Rwdd2a	RWD domain-containing protein 2A	yes	no	6	0.018401	13.188	16268000	0	16268000	0	83587000
VFFLFDNLLVYCKR	14	1	1832.96	Q3LAC4	Q3LAC4	256	269	Prex2	Phosphatidylinositol 3,4,5-trisphosphate-dependent Rac exchanger 2 protein	yes	yes	6	0.022682	11.614	1120200	0	1120200	0	5755700
PLQDPEVQKHATQILRNMLR	20	2	2386.29	A0A1D5RLI4;D6RGQ8;E9Q0A3;Q68FM7	A0A1D5RLI4	179	198	Arhgef11		yes	no	6	0.022693	8.3901	704690	704690	0	704690	0
ILDPIHDIDEEIEAEYNILR	20	0	2409.21	B1AYY3;F6QNG5;Q8K3H5	B1AYY3	51	70	Myo3a	Myosin-IIIa	yes	no	6	0.021086	8.1875	507580	0	507580	0	2608000
TIMLLMSFFVVLYVLENAVFHSR	23	0	2728.45	A0A494BAP1;A0A494BA90;A0A0N4SVQ3;Q9EQ44	A0A494BAP1	239	261	Vmn1r41	Vomeronasal type-1 receptor 41	yes	no	6	0.020305	7.1933	1197500	1197500	0	1197500	0
TYESTQEWTQYMMLEQTR	18	0	2324.01	Q8K0A8;P27664	Q8K0A8	690	707	Pde6a	Rod cGMP-specific 3,5-cyclic phosphodiesterase subunit alpha	yes	no	7	0.022788	4.5266	90204	90204	0	90204	0
FVNLLFSVGNFYLLYLLFR	19	0	2337.29	A0A2R8VJX4;Q3UGP8	A0A2R8VJX4	98	116	Alg10b	Putative Dol-P-Glc:Glc(2)Man(9)GlcNAc(2)-PP-Dol alpha-1,2-glucosyltransferase	yes	no	6	0.021542	3.2874	5705600	5705600	0	5705600	0
YWHEDCLKCACCDCR	15	1	2131.78	E0CXD7;E0CY33;E0CYK7;A0A140LHX4;A0A140LIB4;E9PWI9;Q8BZL8;Q924W9	E0CXD7	32	46	Lmo3;Lmo1	LIM domain only protein 3;Rhombotin-1	yes	no	7	0.022766	0.68953	737060	0	737060	0	3787100
CCFCFGPDGEDTEEQQNVKK	20	1	2446.98	Q8BHJ6	Q8BHJ6	356	375	Serinc5	Serine incorporator 5	yes	yes	6	0.022653	0.30394	5869900	5869900	0	5869900	0

## Sheet: Protein Groups
Protein IDs	Majority protein IDs	Protein names	Gene names	Fasta headers	Number of proteins	Peptides	Unique peptides	Peptides BTP20221219-09-06	Peptides BTP20221219-09-07	Peptides BTP20221219-09-08	Unique peptides BTP20221219-09-06	Unique peptides BTP20221219-09-07	Unique peptides BTP20221219-09-08	Sequence coverage [%]	Unique sequence coverage [%]	Mol. weight [kDa]	Sequence length	Sequence lengths	Q-value	Score	Sequence coverage BTP20221219-09-06 [%]	Sequence coverage BTP20221219-09-07 [%]	Sequence coverage BTP20221219-09-08 [%]	Intensity	Intensity GST beads+Ovary lysate	Intensity CXCL10-GST-beads+Ovary lysate	LFQ intensity GST beads+Ovary lysate	LFQ intensity CXCL10-GST-beads+Ovary lysate
D3YW23;CXCL10;P17515;Q9D1T8;E9Q707;Q9CXE0	D3YW23;CXCL10;P17515	C-X-C motif chemokine;C-X-C motif chemokine 10	Cxcl10	tr|D3YW23|D3YW23_MOUSE C-X-C motif chemokine OS=Mus musculus OX=10090 GN=Cxcl10 PE=3 SV=1;sp|CXCL10|;sp|P17515|CXL10_MOUSE C-X-C motif chemokine 10 OS=Mus musculus OX=10090 GN=Cxcl10 PE=1 SV=1	6	10	10	0	10	6	0	10	6	59.1	59.1	10.249	93	93;98;98;221;415;599	0	323.31	0	59.1	39.8	43410000000	0	42408000000	0	181380000000
A2AE89;P10649;F6WHQ7;A2AE91;D3YVP8;E9PV63	A2AE89;P10649;F6WHQ7	Glutathione S-transferase Mu 1	Gstm1	tr|A2AE89|A2AE89_MOUSE Glutathione transferase OS=Mus musculus OX=10090 GN=Gstm1 PE=1 SV=2;sp|P10649|GSTM1_MOUSE Glutathione S-transferase Mu 1 OS=Mus musculus OX=10090 GN=Gstm1 PE=1 SV=2;tr|F6WHQ7|F6WHQ7_MOUSE Glutathione S-transferase Mu 1 (Fragment) OS=	6	13	6	13	0	0	6	0	0	37.3	16	28.556	244	244;218;194;184;123;158	0	323.31	37.3	0	0	1949300000	1949300000	0	1766600000	0
P10126;D3YZ68;D3Z3I8	P10126;D3YZ68;D3Z3I8	Elongation factor 1-alpha 1	Eef1a1	sp|P10126|EF1A1_MOUSE Elongation factor 1-alpha 1 OS=Mus musculus OX=10090 GN=Eef1a1 PE=1 SV=3;tr|D3YZ68|D3YZ68_MOUSE Elongation factor 1-alpha 1 (Fragment) OS=Mus musculus OX=10090 GN=Eef1a1 PE=1 SV=1;tr|D3Z3I8|D3Z3I8_MOUSE Elongation factor 1-alpha 1 (Fr	3	13	8	13	1	0	8	0	0	37.2	24	50.113	462	462;249;186	0	323.31	37.2	2.4	0	1615100000	1599400000	15675000	1488700000	0
P11499;E9PX27;E9Q3D6;D3Z1R1;E9Q0C3;A0A668KLD0;Q6DFZ1	P11499	Heat shock protein HSP 90-beta	Hsp90ab1	sp|P11499|HS90B_MOUSE Heat shock protein HSP 90-beta OS=Mus musculus OX=10090 GN=Hsp90ab1 PE=1 SV=3	7	18	11	18	0	0	11	0	0	26.8	18.2	83.28	724	724;112;189;76;161;187;1861	0	323.31	26.8	0	0	1476000000	1476000000	0	1344700000	0
P99024;Q9CWF2;Q7TMM9;Q9D6F9;Q9ERD7;G3UZR1;Q922F4;A0A1D5RM76	P99024;Q9CWF2;Q7TMM9	Tubulin beta-5 chain;Tubulin beta-2B chain;Tubulin beta-2A chain	Tubb5;Tubb2b;Tubb2a	sp|P99024|TBB5_MOUSE Tubulin beta-5 chain OS=Mus musculus OX=10090 GN=Tubb5 PE=1 SV=1;sp|Q9CWF2|TBB2B_MOUSE Tubulin beta-2B chain OS=Mus musculus OX=10090 GN=Tubb2b PE=1 SV=1;sp|Q7TMM9|TBB2A_MOUSE Tubulin beta-2A chain OS=Mus musculus OX=10090 GN=Tubb2a PE	8	7	2	7	0	0	2	0	0	17.6	6.1	49.67	444	444;445;445;444;450;66;447;122	0	323.31	17.6	0	0	570670000	570670000	0	543180000	0
P68373;P68369;P05213;A0A2R8VHF3;P05214;A0A0A0MQA5;P68368;Q3UX10;Q9JJZ2	P68373;P68369;P05213;A0A2R8VHF3;P05214	Tubulin alpha-1C chain;Tubulin alpha-1A chain;Tubulin alpha-1B chain;Tubulin alpha-3 chain	Tuba1c;Tuba1a;Tuba1b;Tuba3a	sp|P68373|TBA1C_MOUSE Tubulin alpha-1C chain OS=Mus musculus OX=10090 GN=Tuba1c PE=1 SV=1;sp|P68369|TBA1A_MOUSE Tubulin alpha-1A chain OS=Mus musculus OX=10090 GN=Tuba1a PE=1 SV=1;sp|P05213|TBA1B_MOUSE Tubulin alpha-1B chain OS=Mus musculus OX=10090 GN=Tub	9	5	5	5	1	0	5	1	0	15.8	15.8	49.909	449	449;451;451;267;450;477;448;446;449	0	323.31	15.8	3.3	0	555900000	523930000	31964000	520240000	0
Q9QZ82;A0A087WRU6	Q9QZ82	Cholesterol side-chain cleavage enzyme, mitochondrial	Cyp11a1	sp|Q9QZ82|CP11A_MOUSE Cholesterol side-chain cleavage enzyme, mitochondrial OS=Mus musculus OX=10090 GN=Cyp11a1 PE=1 SV=1	2	5	5	5	0	0	5	0	0	8.7	8.7	60.314	526	526;279	0	323.31	8.7	0	0	552460000	552460000	0	552460000	0
P62082	P62082	40S ribosomal protein S7	Rps7	sp|P62082|RS7_MOUSE 40S ribosomal protein S7 OS=Mus musculus OX=10090 GN=Rps7 PE=1 SV=1	1	4	4	4	0	0	4	0	0	22.7	22.7	22.127	194	194	0	323.31	22.7	0	0	474560000	474560000	0	474560000	0
P07901;B7ZC50;A2A6A2;B7ZC49	P07901	Heat shock protein HSP 90-alpha	Hsp90aa1	sp|P07901|HS90A_MOUSE Heat shock protein HSP 90-alpha OS=Mus musculus OX=10090 GN=Hsp90aa1 PE=1 SV=4	4	15	9	15	0	0	9	0	0	23.3	14.9	84.787	733	733;201;98;103	0	323.31	23.3	0	0	444410000	444410000	0	430730000	0
P24815	P24815	3 beta-hydroxysteroid dehydrogenase/Delta 5-->4-isomerase type 1;3-beta-hydroxy-Delta(5)-steroid dehydrogenase;Steroid Delta-isomerase	Hsd3b1	sp|P24815|3BHS1_MOUSE 3 beta-hydroxysteroid dehydrogenase/Delta 5-->4-isomerase type 1 OS=Mus musculus OX=10090 GN=Hsd3b1 PE=1 SV=3	1	5	5	5	0	0	5	0	0	14.7	14.7	42.062	373	373	0	323.31	14.7	0	0	101660000	101660000	0	101660000	0
D3Z1S1;F6WYM0;D3YYB1;D3Z3C0;P42208;D3YV76;F6UKN5;D3YZU7;E9Q3V6;E9Q9F5;E9Q1G8;O55131	D3Z1S1;F6WYM0;D3YYB1;D3Z3C0;P42208;D3YV76;F6UKN5;D3YZU7;E9Q3V6	Septin-2	Sept2	tr|D3Z1S1|D3Z1S1_MOUSE Septin-2 (Fragment) OS=Mus musculus OX=10090 GN=Septin2 PE=1 SV=1;tr|F6WYM0|F6WYM0_MOUSE Septin-2 (Fragment) OS=Mus musculus OX=10090 GN=Septin2 PE=1 SV=2;tr|D3YYB1|D3YYB1_MOUSE Septin-2 (Fragment) OS=Mus musculus OX=10090 GN=Septin2	12	6	6	6	0	0	6	0	0	37.9	37.9	20.015	177	177;212;213;221;361;77;107;120;321;437;437;436	0	323.31	37.9	0	0	37362000	37362000	0	37362000	0
P20029	P20029	78 kDa glucose-regulated protein	Hspa5	sp|P20029|BIP_MOUSE Endoplasmic reticulum chaperone BiP OS=Mus musculus OX=10090 GN=Hspa5 PE=1 SV=3	1	3	3	3	0	0	3	0	0	6.3	6.3	72.421	655	655	0	323.31	6.3	0	0	12169000	12169000	0	12169000	0
Q99MR6;A0A0G2JDN3;A0A1Y7VNN4;A0A0G2JDF1;A0A0G2JG65;A0A0G2JDF8	Q99MR6;A0A0G2JDN3;A0A1Y7VNN4	Serrate RNA effector molecule homolog	Srrt	sp|Q99MR6|SRRT_MOUSE Serrate RNA effector molecule homolog OS=Mus musculus OX=10090 GN=Srrt PE=1 SV=1;tr|A0A0G2JDN3|A0A0G2JDN3_MOUSE Serrate RNA effector molecule homolog OS=Mus musculus OX=10090 GN=Srrt PE=1 SV=1;tr|A0A1Y7VNN4|A0A1Y7VNN4_MOUSE Serrate RNA	6	4	4	4	0	0	4	0	0	4.7	4.7	100.45	875	875;467;63;239;269;517	0	316.9	4.7	0	0	96049000	96049000	0	96049000	0
Q8VDJ3;A0A087WP83;A0A087WQY9;A0A087WPC5;A0A087WS92;A0A087WPH2	Q8VDJ3;A0A087WP83	Vigilin	Hdlbp	sp|Q8VDJ3|VIGLN_MOUSE Vigilin OS=Mus musculus OX=10090 GN=Hdlbp PE=1 SV=1;tr|A0A087WP83|A0A087WP83_MOUSE Vigilin OS=Mus musculus OX=10090 GN=Hdlbp PE=1 SV=1	6	6	6	6	0	0	6	0	0	7.5	7.5	141.74	1268	1268;1199;129;141;178;22	0	293.59	7.5	0	0	96121000	96121000	0	96121000	0
A0A0J9YUZ4;P63158;A0A0J9YUD8;D3YZ18;D3YVC6	A0A0J9YUZ4;P63158;A0A0J9YUD8;D3YZ18	High mobility group protein B1	Hmgb1	tr|A0A0J9YUZ4|A0A0J9YUZ4_MOUSE High mobility group protein B1 (Fragment) OS=Mus musculus OX=10090 GN=Hmgb1 PE=1 SV=1;sp|P63158|HMGB1_MOUSE High mobility group protein B1 OS=Mus musculus OX=10090 GN=Hmgb1 PE=1 SV=2;tr|A0A0J9YUD8|A0A0J9YUD8_MOUSE High mobili	5	10	10	10	0	0	10	0	0	29.9	29.9	24.233	211	211;215;171;124;92	0	284.86	29.9	0	0	1796400000	1796400000	0	1796400000	0
P09405	P09405	Nucleolin	Ncl	sp|P09405|NUCL_MOUSE Nucleolin OS=Mus musculus OX=10090 GN=Ncl PE=1 SV=2	1	9	9	9	0	0	9	0	0	15.3	15.3	76.722	707	707	0	275.84	15.3	0	0	463990000	463990000	0	463990000	0
P15864;I7HFT9;Q07133;P43275	P15864	Histone H1.2	Hist1h1c	sp|P15864|H12_MOUSE Histone H1.2 OS=Mus musculus OX=10090 GN=H1-2 PE=1 SV=2	4	7	2	7	0	0	2	0	0	27.4	9.4	21.266	212	212;209;208;213	0	255.36	27.4	0	0	97045000	97045000	0	97045000	0
Q9WTM5;A0A1B0GSR4;A0A1B0GRW3	Q9WTM5;A0A1B0GSR4;A0A1B0GRW3	RuvB-like 2	Ruvbl2	sp|Q9WTM5|RUVB2_MOUSE RuvB-like 2 OS=Mus musculus OX=10090 GN=Ruvbl2 PE=1 SV=3;tr|A0A1B0GSR4|A0A1B0GSR4_MOUSE RuvB-like helicase (Fragment) OS=Mus musculus OX=10090 GN=Ruvbl2 PE=1 SV=1;tr|A0A1B0GRW3|A0A1B0GRW3_MOUSE RuvB-like helicase (Fragment) OS=Mus mus	3	2	2	2	0	0	2	0	0	5	5	51.112	463	463;221;237	0	222.1	5	0	0	27896000	27896000	0	27896000	0
Q8BMS1	Q8BMS1	Trifunctional enzyme subunit alpha, mitochondrial;Long-chain enoyl-CoA hydratase;Long chain 3-hydroxyacyl-CoA dehydrogenase	Hadha	sp|Q8BMS1|ECHA_MOUSE Trifunctional enzyme subunit alpha, mitochondrial OS=Mus musculus OX=10090 GN=Hadha PE=1 SV=1	1	9	9	9	0	0	9	0	0	12.2	12.2	82.669	763	763	0	212.57	12.2	0	0	166620000	166620000	0	166620000	0
A8DUK4;E9Q223;P02088	A8DUK4;E9Q223		Hbbt1;Hbb-bs	tr|A8DUK4|A8DUK4_MOUSE Beta-globin OS=Mus musculus OX=10090 GN=Hbb-bs PE=1 SV=1;tr|E9Q223|E9Q223_MOUSE Hemoglobin, beta adult s chain (Fragment) OS=Mus musculus OX=10090 GN=Hbb-bs PE=1 SV=1	3	3	3	3	0	0	3	0	0	31.3	31.3	15.748	147	147;103;147	0	197.42	31.3	0	0	623990000	623990000	0	623990000	0
A0A1B0GSF7;A0A1B0GQU8;P35980;A0A1B0GSS8;A0A1B0GRZ3;A0A1B0GS28;A0A1B0GSA8	A0A1B0GSF7;A0A1B0GQU8;P35980;A0A1B0GSS8	60S ribosomal protein L18	Rpl18	tr|A0A1B0GSF7|A0A1B0GSF7_MOUSE 60S ribosomal protein L18 OS=Mus musculus OX=10090 GN=Rpl18 PE=1 SV=1;tr|A0A1B0GQU8|A0A1B0GQU8_MOUSE 60S ribosomal protein L18 OS=Mus musculus OX=10090 GN=Rpl18 PE=1 SV=1;sp|P35980|RL18_MOUSE 60S ribosomal protein L18 OS=Mus	7	3	3	3	0	0	3	0	0	25.7	25.7	15.245	136	136;159;188;155;57;80;126	0	169.18	25.7	0	0	61853000	61853000	0	61853000	0
P15626;D3YX76;D3YVP6;Q80W21;E9QAC8;D3YVP5;Q8R5I6;D3YZ29;D3YVP9;G5E8M7;O35660	P15626;D3YX76	Glutathione S-transferase Mu 2	Gstm2	sp|P15626|GSTM2_MOUSE Glutathione S-transferase Mu 2 OS=Mus musculus OX=10090 GN=Gstm2 PE=1 SV=2;tr|D3YX76|D3YX76_MOUSE Glutathione S-transferase OS=Mus musculus OX=10090 GN=Gstm2 PE=1 SV=1	11	13	6	13	0	0	6	0	0	54.6	28.4	25.716	218	218;184;181;218;193;214;218;119;154;232;218	0	156.77	54.6	0	0	635390000	635390000	0	635390000	0
Q9D0E1;B8JK33;B8JK32	Q9D0E1;B8JK33;B8JK32	Heterogeneous nuclear ribonucleoprotein M	Hnrnpm	sp|Q9D0E1|HNRPM_MOUSE Heterogeneous nuclear ribonucleoprotein M OS=Mus musculus OX=10090 GN=Hnrnpm PE=1 SV=3;tr|B8JK33|B8JK33_MOUSE Heterogeneous nuclear ribonucleoprotein M OS=Mus musculus OX=10090 GN=Hnrnpm PE=1 SV=1;tr|B8JK32|B8JK32_MOUSE Heterogeneous	3	2	2	2	0	0	2	0	0	4.3	4.3	77.648	729	729;640;679	0	128.6	4.3	0	0	23824000	23824000	0	23824000	0
P25206	P25206	DNA replication licensing factor MCM3	Mcm3	sp|P25206|MCM3_MOUSE DNA replication licensing factor MCM3 OS=Mus musculus OX=10090 GN=Mcm3 PE=1 SV=2	1	3	3	3	0	0	3	0	0	5	5	91.545	812	812	0	128.16	5	0	0	47529000	47529000	0	47529000	0
A0A140LI77;D3YV43;P62908	A0A140LI77;D3YV43;P62908	40S ribosomal protein S3	Rps3	tr|A0A140LI77|A0A140LI77_MOUSE 40S ribosomal protein S3 OS=Mus musculus OX=10090 GN=Rps3 PE=1 SV=1;tr|D3YV43|D3YV43_MOUSE 40S ribosomal protein S3 OS=Mus musculus OX=10090 GN=Rps3 PE=1 SV=1;sp|P62908|RS3_MOUSE 40S ribosomal protein S3 OS=Mus musculus OX=10	3	4	4	4	0	0	4	0	0	28.5	28.5	15.797	144	144;191;243	0	114.09	28.5	0	0	145420000	145420000	0	145420000	0
P60867	P60867	40S ribosomal protein S20	Rps20	sp|P60867|RS20_MOUSE 40S ribosomal protein S20 OS=Mus musculus OX=10090 GN=Rps20 PE=1 SV=1	1	4	4	4	0	0	4	0	0	25.2	25.2	13.373	119	119	0	113.04	25.2	0	0	144370000	144370000	0	144370000	0
P63260;P60710;E9Q5F4;E9Q1F2;P63268;P68134;P68033;P62737;G3UZ07;G3UYG0;E9Q606;B1ATY1;A0A1D5RM20;D3Z2K3;A0A494B9T3;D3YZY0;Q8BFZ3;F6WX90;F8WGM8;E9Q2D1;A0A0U1RQ96	P63260;P60710;E9Q5F4;E9Q1F2;P63268;P68134;P68033;P62737;G3UZ07	Actin, cytoplasmic 2;Actin, cytoplasmic 2, N-terminally processed;Actin, cytoplasmic 1;Actin, cytoplasmic 1, N-terminally processed;Actin, gamma-enteric smooth muscle;Actin, alpha skeletal muscle;Actin, alpha cardiac muscle 1;Actin, aortic smooth muscle	Actg1;Actb;Actg2;Acta1;Actc1;Acta2	sp|P63260|ACTG_MOUSE Actin, cytoplasmic 2 OS=Mus musculus OX=10090 GN=Actg1 PE=1 SV=1;sp|P60710|ACTB_MOUSE Actin, cytoplasmic 1 OS=Mus musculus OX=10090 GN=Actb PE=1 SV=1;tr|E9Q5F4|E9Q5F4_MOUSE Actin, cytoplasmic 1 (Fragment) OS=Mus musculus OX=10090 GN=Ac	21	7	7	7	0	0	7	0	0	22.9	22.9	41.792	375	375;375;265;295;376;377;377;377;268;132;150;153;151;195;214;221;376;43;105;108;195	0	106.56	22.9	0	0	193620000	193620000	0	183850000	0
Q3TFP0;Q9R0U0	Q3TFP0;Q9R0U0	Serine/arginine-rich splicing factor 10	Srsf10	tr|Q3TFP0|Q3TFP0_MOUSE Serine/arginine-rich-splicing factor 10 OS=Mus musculus OX=10090 GN=Srsf10 PE=1 SV=1;sp|Q9R0U0|SRS10_MOUSE Serine/arginine-rich splicing factor 10 OS=Mus musculus OX=10090 GN=Srsf10 PE=1 SV=2	2	1	1	1	0	0	1	0	0	8.8	8.8	22.135	182	182;262	0	106.35	8.8	0	0	85776000	85776000	0	85776000	0
D3YVC1;D3YWJ3;P25444	D3YVC1;D3YWJ3;P25444	40S ribosomal protein S2	Rps2	tr|D3YVC1|D3YVC1_MOUSE 40S ribosomal protein S2 (Fragment) OS=Mus musculus OX=10090 GN=Rps2 PE=1 SV=1;tr|D3YWJ3|D3YWJ3_MOUSE 40S ribosomal protein S2 OS=Mus musculus OX=10090 GN=Rps2 PE=1 SV=1;sp|P25444|RS2_MOUSE 40S ribosomal protein S2 OS=Mus musculus OX	3	2	2	2	0	0	2	0	0	7.8	7.8	28.601	269	269;302;293	0	106.07	7.8	0	0	6351200	6351200	0	6351200	0
P08113;F7C312	P08113	Endoplasmin	Hsp90b1	sp|P08113|ENPL_MOUSE Endoplasmin OS=Mus musculus OX=10090 GN=Hsp90b1 PE=1 SV=2	2	3	2	3	1	0	2	1	0	7	5.2	92.475	802	802;373	0	105.61	7	2.7	0	230700000	187390000	43306000	128430000	0
A0A0G2JGQ5;A0A0G2JG10;Q497W9;O35286	A0A0G2JGQ5;A0A0G2JG10;Q497W9;O35286	Pre-mRNA-splicing factor ATP-dependent RNA helicase DHX15	Dhx15	tr|A0A0G2JGQ5|A0A0G2JGQ5_MOUSE ATP-dependent RNA helicase DHX15 (Fragment) OS=Mus musculus OX=10090 GN=Dhx15 PE=1 SV=1;tr|A0A0G2JG10|A0A0G2JG10_MOUSE RNA helicase OS=Mus musculus OX=10090 GN=Dhx15 PE=1 SV=1;tr|Q497W9|Q497W9_MOUSE RNA helicase OS=Mus muscul	4	2	2	2	0	0	2	0	0	13.4	13.4	21.176	186	186;608;703;795	0	99.388	13.4	0	0	48173000	48173000	0	48173000	0
P47856;D3YYE0;D3YYD9	P47856;D3YYE0;D3YYD9	Glutamine--fructose-6-phosphate aminotransferase [isomerizing] 1	Gfpt1	sp|P47856|GFPT1_MOUSE Glutamine--fructose-6-phosphate aminotransferase [isomerizing] 1 OS=Mus musculus OX=10090 GN=Gfpt1 PE=1 SV=3;tr|D3YYE0|D3YYE0_MOUSE Glutamine--fructose-6-phosphate aminotransferase [isomerizing] 1 OS=Mus musculus OX=10090 GN=Gfpt1 PE=	3	2	2	2	0	0	2	0	0	3.4	3.4	78.538	697	697;102;124	0	97.302	3.4	0	0	46831000	46831000	0	46831000	0
P14873	P14873	Microtubule-associated protein 1B;MAP1B heavy chain;MAP1 light chain LC1	Map1b	sp|P14873|MAP1B_MOUSE Microtubule-associated protein 1B OS=Mus musculus OX=10090 GN=Map1b PE=1 SV=2	1	6	6	6	0	0	6	0	0	3.6	3.6	270.25	2464	2464	0	93.848	3.6	0	0	33979000	33979000	0	33979000	0
Q8VEK3	Q8VEK3	Heterogeneous nuclear ribonucleoprotein U	Hnrnpu	sp|Q8VEK3|HNRPU_MOUSE Heterogeneous nuclear ribonucleoprotein U OS=Mus musculus OX=10090 GN=Hnrnpu PE=1 SV=1	1	3	3	3	0	0	3	0	0	4.5	4.5	87.917	800	800	0	93.662	4.5	0	0	85500000	85500000	0	85500000	0
Q99N15;A2AFQ2;O08756	Q99N15;A2AFQ2		Hsd17b10	tr|Q99N15|Q99N15_MOUSE 17beta-hydroxysteroid dehydrogenase type 10/short chain L-3-hydroxyacyl-CoA dehydrogenase OS=Mus musculus OX=10090 GN=Hsd17b10 PE=1 SV=1;tr|A2AFQ2|A2AFQ2_MOUSE 3-hydroxyacyl-CoA dehydrogenase type-2 OS=Mus musculus OX=10090 GN=Hsd17b	3	3	3	3	0	0	3	0	0	15.3	15.3	27.273	261	261;271;261	0	89.261	15.3	0	0	2217800	2217800	0	2217800	0
A0A0U1RPW2;B9EHJ3;P39447;A0A0U1RPB2	A0A0U1RPW2;B9EHJ3;P39447	Tight junction protein ZO-1	Tjp1	tr|A0A0U1RPW2|A0A0U1RPW2_MOUSE Tight junction protein ZO-1 OS=Mus musculus OX=10090 GN=Tjp1 PE=1 SV=1;tr|B9EHJ3|B9EHJ3_MOUSE Tight junction protein ZO-1 OS=Mus musculus OX=10090 GN=Tjp1 PE=1 SV=1;sp|P39447|ZO1_MOUSE Tight junction protein ZO-1 OS=Mus muscu	4	3	3	3	0	0	3	0	0	4.1	4.1	127.25	1128	1128;1685;1745;171	0	86.179	4.1	0	0	24466000	24466000	0	24466000	0
Q03265;D3Z6F5;D6RJ16	Q03265;D3Z6F5	ATP synthase subunit alpha, mitochondrial;ATP synthase subunit alpha	Atp5a1	sp|Q03265|ATPA_MOUSE ATP synthase subunit alpha, mitochondrial OS=Mus musculus OX=10090 GN=Atp5f1a PE=1 SV=1;tr|D3Z6F5|D3Z6F5_MOUSE ATP synthase subunit alpha OS=Mus musculus OX=10090 GN=Atp5a1 PE=1 SV=1	3	8	8	8	0	0	8	0	0	17.2	17.2	59.752	553	553;503;89	0	83.41	17.2	0	0	139820000	139820000	0	139820000	0
Q61029;Q61033	Q61029;Q61033	Lamina-associated polypeptide 2, isoforms beta/delta/epsilon/gamma;Lamina-associated polypeptide 2, isoforms alpha/zeta	Tmpo	sp|Q61029|LAP2B_MOUSE Lamina-associated polypeptide 2, isoforms beta/delta/epsilon/gamma OS=Mus musculus OX=10090 GN=Tmpo PE=1 SV=4;sp|Q61033|LAP2A_MOUSE Lamina-associated polypeptide 2, isoforms alpha/zeta OS=Mus musculus OX=10090 GN=Tmpo PE=1 SV=4	2	4	4	4	0	0	4	0	0	16.4	16.4	50.372	452	452;693	0	82.15	16.4	0	0	223860000	223860000	0	223860000	0
Q3UZG4;P31230	Q3UZG4;P31230	Aminoacyl tRNA synthase complex-interacting multifunctional protein 1;Endothelial monocyte-activating polypeptide 2	Aimp1	tr|Q3UZG4|Q3UZG4_MOUSE Aminoacyl tRNA synthase complex-interacting multifunctional protein 1 OS=Mus musculus OX=10090 GN=Aimp1 PE=1 SV=1;sp|P31230|AIMP1_MOUSE Aminoacyl tRNA synthase complex-interacting multifunctional protein 1 OS=Mus musculus OX=10090 GN	2	1	1	1	0	0	1	0	0	6.6	6.6	35.166	319	319;310	0	82.024	6.6	0	0	44177000	44177000	0	44177000	0
B7FAV1;B7FAU9;Q8BTM8	B7FAV1;B7FAU9;Q8BTM8	Filamin-A	Flna	tr|B7FAV1|B7FAV1_MOUSE Filamin, alpha (Fragment) OS=Mus musculus OX=10090 GN=Flna PE=1 SV=1;tr|B7FAU9|B7FAU9_MOUSE Filamin, alpha OS=Mus musculus OX=10090 GN=Flna PE=1 SV=1;sp|Q8BTM8|FLNA_MOUSE Filamin-A OS=Mus musculus OX=10090 GN=Flna PE=1 SV=5	3	7	7	7	0	0	7	0	0	4.6	4.6	274.63	2583	2583;2639;2647	0	72.422	4.6	0	0	123180000	123180000	0	120440000	0
H7BX95;Q6PDM2;F7AI47	H7BX95;Q6PDM2	Serine/arginine-rich splicing factor 1	Srsf1	tr|H7BX95|H7BX95_MOUSE Serine/arginine-rich splicing factor 1 OS=Mus musculus OX=10090 GN=Srsf1 PE=1 SV=1;sp|Q6PDM2|SRSF1_MOUSE Serine/arginine-rich splicing factor 1 OS=Mus musculus OX=10090 GN=Srsf1 PE=1 SV=3	3	8	8	8	0	0	8	0	0	32.4	32.4	28.329	253	253;248;106	0	70.544	32.4	0	0	366450000	366450000	0	357030000	0
Q8CGC7	Q8CGC7	Bifunctional glutamate/proline--tRNA ligase;Glutamate--tRNA ligase;Proline--tRNA ligase	Eprs	sp|Q8CGC7|SYEP_MOUSE Bifunctional glutamate/proline--tRNA ligase OS=Mus musculus OX=10090 GN=Eprs1 PE=1 SV=4	1	3	3	3	0	0	3	0	0	3.6	3.6	170.08	1512	1512	0	68.125	3.6	0	0	54633000	54633000	0	54633000	0
A0A2R8VHF9;E9QPE7;A0A338P6K2;O08638	A0A2R8VHF9;E9QPE7;A0A338P6K2;O08638	Myosin-11	Myh11	tr|A0A2R8VHF9|A0A2R8VHF9_MOUSE Myosin-11 OS=Mus musculus OX=10090 GN=Myh11 PE=1 SV=1;tr|E9QPE7|E9QPE7_MOUSE Myosin-11 OS=Mus musculus OX=10090 GN=Myh11 PE=1 SV=2;tr|A0A338P6K2|A0A338P6K2_MOUSE Myosin-11 OS=Mus musculus OX=10090 GN=Myh11 PE=1 SV=1;sp|O08638	4	4	4	4	0	0	4	0	0	2.2	2.2	223.35	1938	1938;1972;1979;1972	0	63.099	2.2	0	0	64753000	64753000	0	64753000	0
Q9D0M3;A0A2R8VHK1	Q9D0M3;A0A2R8VHK1	Cytochrome c1, heme protein, mitochondrial	Cyc1	sp|Q9D0M3|CY1_MOUSE Cytochrome c1, heme protein, mitochondrial OS=Mus musculus OX=10090 GN=Cyc1 PE=1 SV=1;tr|A0A2R8VHK1|A0A2R8VHK1_MOUSE Cytochrome c1, heme protein, mitochondrial (Fragment) OS=Mus musculus OX=10090 GN=Cyc1 PE=1 SV=1	2	4	4	4	0	0	4	0	0	10.2	10.2	35.327	325	325;165	0	61.656	10.2	0	0	36633000	36633000	0	36633000	0
Q9JHU4	Q9JHU4	Cytoplasmic dynein 1 heavy chain 1	Dync1h1	sp|Q9JHU4|DYHC1_MOUSE Cytoplasmic dynein 1 heavy chain 1 OS=Mus musculus OX=10090 GN=Dync1h1 PE=1 SV=2	1	4	4	4	0	0	4	0	0	0.9	0.9	532.04	4644	4644	0	59.462	0.9	0	0	8011900	8011900	0	8011900	0
P43274	P43274	Histone H1.4	Hist1h1e	sp|P43274|H14_MOUSE Histone H1.4 OS=Mus musculus OX=10090 GN=H1-4 PE=1 SV=2	1	8	4	8	0	0	4	0	0	26.5	15.1	21.977	219	219	0	56.692	26.5	0	0	173640000	173640000	0	173640000	0
A0A087WPL5;E9QNN1;Q3UR42;O70133;A0A0R4J2C3	A0A087WPL5;E9QNN1;Q3UR42;O70133	ATP-dependent RNA helicase A	Dhx9	tr|A0A087WPL5|A0A087WPL5_MOUSE RNA helicase OS=Mus musculus OX=10090 GN=Dhx9 PE=1 SV=1;tr|E9QNN1|E9QNN1_MOUSE RNA helicase OS=Mus musculus OX=10090 GN=Dhx9 PE=1 SV=1;tr|Q3UR42|Q3UR42_MOUSE RNA helicase (Fragment) OS=Mus musculus OX=10090 GN=Dhx9 PE=1 SV=1;	5	3	3	3	0	0	3	0	0	3.3	3.3	149.62	1383	1383;1384;735;1380;459	0	54.992	3.3	0	0	29984000	29984000	0	29984000	0
P84104	P84104	Serine/arginine-rich splicing factor 3	Srsf3	sp|P84104|SRSF3_MOUSE Serine/arginine-rich splicing factor 3 OS=Mus musculus OX=10090 GN=Srsf3 PE=1 SV=1	1	4	4	4	0	0	4	0	0	28	28	19.329	164	164	0	53.826	28	0	0	304180000	304180000	0	304180000	0
P62855	P62855	40S ribosomal protein S26	Rps26	sp|P62855|RS26_MOUSE 40S ribosomal protein S26 OS=Mus musculus OX=10090 GN=Rps26 PE=1 SV=3	1	2	2	2	0	0	2	0	0	20.9	20.9	13.015	115	115	0	53.511	20.9	0	0	125400000	125400000	0	125400000	0
Q9QZD9	Q9QZD9	Eukaryotic translation initiation factor 3 subunit I	Eif3i	sp|Q9QZD9|EIF3I_MOUSE Eukaryotic translation initiation factor 3 subunit I OS=Mus musculus OX=10090 GN=Eif3i PE=1 SV=1	1	2	2	2	0	0	2	0	0	7.1	7.1	36.46	325	325	0	50.904	7.1	0	0	11476000	11476000	0	11476000	0
O88569;A0A0N4SUM2	O88569	Heterogeneous nuclear ribonucleoproteins A2/B1	Hnrnpa2b1	sp|O88569|ROA2_MOUSE Heterogeneous nuclear ribonucleoproteins A2/B1 OS=Mus musculus OX=10090 GN=Hnrnpa2b1 PE=1 SV=2	2	3	3	3	0	0	3	0	0	9.9	9.9	37.402	353	353;155	0	49.638	9.9	0	0	61114000	61114000	0	61114000	0
A0A0R3P9C8;Q9DC69	A0A0R3P9C8;Q9DC69	NADH dehydrogenase [ubiquinone] 1 alpha subcomplex subunit 9, mitochondrial	Ndufa9	tr|A0A0R3P9C8|A0A0R3P9C8_MOUSE NADH dehydrogenase [ubiquinone] 1 alpha subcomplex subunit 9, mitochondrial OS=Mus musculus OX=10090 GN=Ndufa9 PE=1 SV=1;sp|Q9DC69|NDUA9_MOUSE NADH dehydrogenase [ubiquinone] 1 alpha subcomplex subunit 9, mitochondrial OS=Mus	2	1	1	1	0	0	1	0	0	5.1	5.1	42.121	373	373;377	0	48.976	5.1	0	0	40359000	40359000	0	40359000	0
Q8BU14	Q8BU14	Translocation protein SEC62	Sec62	sp|Q8BU14|SEC62_MOUSE Translocation protein SEC62 OS=Mus musculus OX=10090 GN=Sec62 PE=1 SV=1	1	1	1	1	0	0	1	0	0	2.5	2.5	45.58	398	398	0	48.644	2.5	0	0	0	0	0	0	0
G3UZ34;A2AH85;O08810	G3UZ34;A2AH85;O08810	116 kDa U5 small nuclear ribonucleoprotein component	Eftud2	tr|G3UZ34|G3UZ34_MOUSE 116 kDa U5 small nuclear ribonucleoprotein component OS=Mus musculus OX=10090 GN=Eftud2 PE=1 SV=1;tr|A2AH85|A2AH85_MOUSE 116 kDa U5 small nuclear ribonucleoprotein component OS=Mus musculus OX=10090 GN=Eftud2 PE=1 SV=1;sp|O08810|U5S1	3	5	5	5	0	0	5	0	0	7.1	7.1	108.34	962	962;972;971	0	47.194	7.1	0	0	72872000	72872000	0	72872000	0
A0A5F8MPB9;P26041;P26043;Q7TSG6;P26040	A0A5F8MPB9;P26041;P26043;Q7TSG6;P26040	Moesin;Radixin;Ezrin	Msn;Rdx;Ezr	tr|A0A5F8MPB9|A0A5F8MPB9_MOUSE Radixin OS=Mus musculus OX=10090 GN=Rdx PE=1 SV=1;sp|P26041|MOES_MOUSE Moesin OS=Mus musculus OX=10090 GN=Msn PE=1 SV=3;sp|P26043|RADI_MOUSE Radixin OS=Mus musculus OX=10090 GN=Rdx PE=1 SV=3;tr|Q7TSG6|Q7TSG6_MOUSE Radixin OS=	5	3	3	3	0	0	3	0	0	4.5	4.5	71.027	604	604;577;583;389;586	0	46.238	4.5	0	0	32646000	32646000	0	32646000	0
Q91YQ5;A0A0N4SUJ8	Q91YQ5;A0A0N4SUJ8	Dolichyl-diphosphooligosaccharide--protein glycosyltransferase subunit 1	Rpn1	sp|Q91YQ5|RPN1_MOUSE Dolichyl-diphosphooligosaccharide--protein glycosyltransferase subunit 1 OS=Mus musculus OX=10090 GN=Rpn1 PE=1 SV=1;tr|A0A0N4SUJ8|A0A0N4SUJ8_MOUSE Dolichyl-diphosphooligosaccharide--protein glycosyltransferase subunit 1 (Fragment) OS=M	2	5	5	5	0	0	5	0	0	11.3	11.3	68.527	608	608;90	0	43.575	11.3	0	0	228190000	228190000	0	228190000	0
P24472	P24472	Glutathione S-transferase A4	Gsta4	sp|P24472|GSTA4_MOUSE Glutathione S-transferase A4 OS=Mus musculus OX=10090 GN=Gsta4 PE=1 SV=3	1	3	3	3	0	0	3	0	0	15.3	15.3	25.564	222	222	0	43.435	15.3	0	0	59229000	59229000	0	59229000	0
Q8BK67;A2AWQ2	Q8BK67;A2AWQ2	Protein RCC2	Rcc2	sp|Q8BK67|RCC2_MOUSE Protein RCC2 OS=Mus musculus OX=10090 GN=Rcc2 PE=1 SV=1;tr|A2AWQ2|A2AWQ2_MOUSE Protein RCC2 (Fragment) OS=Mus musculus OX=10090 GN=Rcc2 PE=1 SV=1	2	3	3	3	0	0	3	0	0	9.8	9.8	55.983	520	520;170	0	40.916	9.8	0	0	48153000	48153000	0	48153000	0
Q8C2Q8;Q91VR2;A2AKV0;A2AKV1;A2AKV2;A2AKV3;A2AKU9	Q8C2Q8;Q91VR2;A2AKV0;A2AKV1;A2AKV2;A2AKV3;A2AKU9	ATP synthase subunit gamma;ATP synthase subunit gamma, mitochondrial	Atp5c1	tr|Q8C2Q8|Q8C2Q8_MOUSE ATP synthase subunit gamma OS=Mus musculus OX=10090 GN=Atp5c1 PE=1 SV=1;sp|Q91VR2|ATPG_MOUSE ATP synthase subunit gamma, mitochondrial OS=Mus musculus OX=10090 GN=Atp5f1c PE=1 SV=1;tr|A2AKV0|A2AKV0_MOUSE ATP synthase, H+-transporting	7	3	3	3	0	0	3	0	0	13.5	13.5	30.255	274	274;298;101;154;171;188;297	0	40.308	13.5	0	0	105380000	105380000	0	105380000	0
Q99KV1;A0A338P778	Q99KV1;A0A338P778	DnaJ homolog subfamily B member 11	Dnajb11	sp|Q99KV1|DJB11_MOUSE DnaJ homolog subfamily B member 11 OS=Mus musculus OX=10090 GN=Dnajb11 PE=1 SV=1;tr|A0A338P778|A0A338P778_MOUSE DnaJ homolog subfamily B member 11 (Fragment) OS=Mus musculus OX=10090 GN=Dnajb11 PE=1 SV=1	2	2	2	2	0	0	2	0	0	10.1	10.1	40.555	358	358;127	0	38.842	10.1	0	0	28248000	28248000	0	28248000	0
A2AL12;Q8BG05	A2AL12;Q8BG05	Heterogeneous nuclear ribonucleoprotein A3	Hnrnpa3	tr|A2AL12|A2AL12_MOUSE Heterogeneous nuclear ribonucleoprotein A3 OS=Mus musculus OX=10090 GN=Hnrnpa3 PE=1 SV=1;sp|Q8BG05|ROA3_MOUSE Heterogeneous nuclear ribonucleoprotein A3 OS=Mus musculus OX=10090 GN=Hnrnpa3 PE=1 SV=1	2	2	2	2	0	0	2	0	0	6.9	6.9	34.476	318	318;379	0	37.887	6.9	0	0	32336000	32336000	0	32336000	0
A0A3Q4EH04;A0A3Q4L335;A0A3Q4L393;Q8BL97	A0A3Q4EH04;A0A3Q4L335;A0A3Q4L393;Q8BL97	Serine/arginine-rich splicing factor 7	Srsf7	tr|A0A3Q4EH04|A0A3Q4EH04_MOUSE Serine/arginine-rich-splicing factor 7 OS=Mus musculus OX=10090 GN=Srsf7 PE=1 SV=1;tr|A0A3Q4L335|A0A3Q4L335_MOUSE Serine/arginine-rich-splicing factor 7 OS=Mus musculus OX=10090 GN=Srsf7 PE=1 SV=1;tr|A0A3Q4L393|A0A3Q4L393_MOU	4	3	3	3	0	0	3	0	0	34.3	34.3	15.763	137	137;215;235;267	0	37.174	34.3	0	0	143060000	143060000	0	143060000	0
Q62093	Q62093	Serine/arginine-rich splicing factor 2	Srsf2	sp|Q62093|SRSF2_MOUSE Serine/arginine-rich splicing factor 2 OS=Mus musculus OX=10090 GN=Srsf2 PE=1 SV=4	1	5	5	5	0	0	5	0	0	27.1	27.1	25.476	221	221	0	37.083	27.1	0	0	89231000	89231000	0	82748000	0
Q9CQ62	Q9CQ62	2,4-dienoyl-CoA reductase, mitochondrial	Decr1	sp|Q9CQ62|DECR_MOUSE 2,4-dienoyl-CoA reductase [(3E)-enoyl-CoA-producing], mitochondrial OS=Mus musculus OX=10090 GN=Decr1 PE=1 SV=1	1	1	1	1	0	0	1	0	0	3.9	3.9	36.213	335	335	0	36.871	3.9	0	0	12001000	12001000	0	12001000	0
F6WR45;E9QAS4;E9PYU4;E9QAS5;E9PYL1;Q6PDQ2;A2A8L1	F6WR45;E9QAS4;E9PYU4;E9QAS5;E9PYL1;Q6PDQ2;A2A8L1	Chromodomain-helicase-DNA-binding protein 4;Chromodomain-helicase-DNA-binding protein 5	Chd4;Chd5	tr|F6WR45|F6WR45_MOUSE Chromodomain-helicase-DNA-binding protein 4 (Fragment) OS=Mus musculus OX=10090 GN=Chd4 PE=1 SV=1;tr|E9QAS4|E9QAS4_MOUSE DNA helicase OS=Mus musculus OX=10090 GN=Chd4 PE=1 SV=1;tr|E9PYU4|E9PYU4_MOUSE DNA helicase OS=Mus musculus OX=1	7	1	1	1	0	0	1	0	0	4.3	4.3	50.304	444	444;1902;1915;1922;1952;1915;1946	0	36.496	4.3	0	0	5789700	5789700	0	5789700	0
G3UY93;Q9Z1Q9;G3UZ22;G3UYW2	G3UY93;Q9Z1Q9;G3UZ22	Valine--tRNA ligase	Vars	tr|G3UY93|G3UY93_MOUSE Valine--tRNA ligase (Fragment) OS=Mus musculus OX=10090 GN=Vars PE=1 SV=1;sp|Q9Z1Q9|SYVC_MOUSE Valine--tRNA ligase OS=Mus musculus OX=10090 GN=Vars1 PE=1 SV=1;tr|G3UZ22|G3UZ22_MOUSE Valyl-tRNA synthetase (Fragment) OS=Mus musculus OX	4	3	3	3	0	0	3	0	0	3.5	3.5	141.41	1278	1278;1263;230;125	0	36.211	3.5	0	0	75584000	75584000	0	75584000	0
Q99L45;E0CXJ3	Q99L45;E0CXJ3	Eukaryotic translation initiation factor 2 subunit 2	Eif2s2	sp|Q99L45|IF2B_MOUSE Eukaryotic translation initiation factor 2 subunit 2 OS=Mus musculus OX=10090 GN=Eif2s2 PE=1 SV=1;tr|E0CXJ3|E0CXJ3_MOUSE Eukaryotic translation initiation factor 2 subunit 2 (Fragment) OS=Mus musculus OX=10090 GN=Eif2s2 PE=1 SV=1	2	2	2	2	0	0	2	0	0	8.2	8.2	38.092	331	331;118	0	35.946	8.2	0	0	6210000	6210000	0	6210000	0
Q9JJI8	Q9JJI8	60S ribosomal protein L38	Rpl38	sp|Q9JJI8|RL38_MOUSE 60S ribosomal protein L38 OS=Mus musculus OX=10090 GN=Rpl38 PE=1 SV=3	1	3	3	3	0	0	3	0	0	40	40	8.2038	70	70	0	35.835	40	0	0	196560000	196560000	0	196560000	0
P62754	P62754	40S ribosomal protein S6	Rps6	sp|P62754|RS6_MOUSE 40S ribosomal protein S6 OS=Mus musculus OX=10090 GN=Rps6 PE=1 SV=1	1	3	3	3	0	0	3	0	0	14.1	14.1	28.68	249	249	0	35.677	14.1	0	0	22617000	22617000	0	22617000	0
E9Q8Z4;E9Q8Z9;D3Z2H2;E9Q903;E9Q901;E9Q904;G3X9V2;E9Q8Z5;E9Q8Z6;E9Q8Z8;P30999;D3Z2H7;E9Q986;D3Z7H6;E9Q906;E9Q907;E9Q905	E9Q8Z4;E9Q8Z9;D3Z2H2;E9Q903;E9Q901;E9Q904;G3X9V2;E9Q8Z5;E9Q8Z6;E9Q8Z8;P30999;D3Z2H7;E9Q986;D3Z7H6;E9Q906;E9Q907;E9Q905	Catenin delta-1	Ctnnd1	tr|E9Q8Z4|E9Q8Z4_MOUSE Catenin delta-1 OS=Mus musculus OX=10090 GN=Ctnnd1 PE=1 SV=1;tr|E9Q8Z9|E9Q8Z9_MOUSE Catenin delta-1 OS=Mus musculus OX=10090 GN=Ctnnd1 PE=1 SV=1;tr|D3Z2H2|D3Z2H2_MOUSE Catenin delta-1 OS=Mus musculus OX=10090 GN=Ctnnd1 PE=1 SV=1;tr|E	17	3	3	3	0	0	3	0	0	4.1	4.1	96.871	868	868;878;884;892;907;913;932;940;961;967;938;609;830;837;839;860;866	0	35.42	4.1	0	0	14344000	14344000	0	14344000	0
H9KV01;H9KV15;H9KV00;Q9QX47;H9KV02	H9KV01;H9KV15;H9KV00;Q9QX47;H9KV02	Protein SON	Son	tr|H9KV01|H9KV01_MOUSE Protein SON OS=Mus musculus OX=10090 GN=Son PE=1 SV=1;tr|H9KV15|H9KV15_MOUSE Protein SON OS=Mus musculus OX=10090 GN=Son PE=1 SV=1;tr|H9KV00|H9KV00_MOUSE Protein SON OS=Mus musculus OX=10090 GN=Son PE=1 SV=1;sp|Q9QX47|SON_MOUSE Prote	5	2	2	2	0	0	2	0	0	1	1	252.18	2321	2321;2343;2477;2444;454	0	35.074	1	0	0	4029300	4029300	0	4029300	0
F6ZV59;G5E8G0;G3X9W0;Q60668;E9Q5B6;F6SHF3	F6ZV59;G5E8G0;G3X9W0;Q60668;E9Q5B6;F6SHF3	Heterogeneous nuclear ribonucleoprotein D0	Hnrnpd	tr|F6ZV59|F6ZV59_MOUSE Heterogeneous nuclear ribonucleoprotein D0 (Fragment) OS=Mus musculus OX=10090 GN=Hnrnpd PE=1 SV=1;tr|G5E8G0|G5E8G0_MOUSE Heterogeneous nuclear ribonucleoprotein D0 OS=Mus musculus OX=10090 GN=Hnrnpd PE=1 SV=1;tr|G3X9W0|G3X9W0_MOUSE	6	4	4	4	0	0	4	0	0	21.3	21.3	24.611	216	216;287;336;355;107;150	0	34.933	21.3	0	0	123560000	123560000	0	123560000	0
P63325;A0A338P731;Q3UW83;A0A338P7K4;A0A3B2W864	P63325;A0A338P731;Q3UW83;A0A338P7K4;A0A3B2W864	40S ribosomal protein S10	Rps10	sp|P63325|RS10_MOUSE 40S ribosomal protein S10 OS=Mus musculus OX=10090 GN=Rps10 PE=1 SV=1;tr|A0A338P731|A0A338P731_MOUSE 40S ribosomal protein S10 (Fragment) OS=Mus musculus OX=10090 GN=Rps10 PE=1 SV=1;tr|Q3UW83|Q3UW83_MOUSE 40S ribosomal protein S10 OS=M	5	2	2	2	0	0	2	0	0	14.5	14.5	18.916	165	165;107;154;169;287	0	34.902	14.5	0	0	27859000	27859000	0	27859000	0
S4R1I6;Q8BTS0;Q61656	S4R1I6;Q8BTS0;Q61656	Probable ATP-dependent RNA helicase DDX5	Ddx5	tr|S4R1I6|S4R1I6_MOUSE RNA helicase OS=Mus musculus OX=10090 GN=Ddx5 PE=1 SV=1;tr|Q8BTS0|Q8BTS0_MOUSE Probable ATP-dependent RNA helicase DDX5 OS=Mus musculus OX=10090 GN=Ddx5 PE=1 SV=1;sp|Q61656|DDX5_MOUSE Probable ATP-dependent RNA helicase DDX5 OS=Mus m	3	4	2	4	0	0	2	0	0	10.3	4.7	46.072	406	406;615;614	0	34.64	10.3	0	0	52129000	52129000	0	52129000	0
P62702	P62702	40S ribosomal protein S4, X isoform	Rps4x	sp|P62702|RS4X_MOUSE 40S ribosomal protein S4, X isoform OS=Mus musculus OX=10090 GN=Rps4x PE=1 SV=2	1	4	4	4	0	0	4	0	0	16	16	29.597	263	263	0	34.59	16	0	0	45080000	45080000	0	45080000	0
P48962;P51881;Q3V132	P48962;P51881	ADP/ATP translocase 1;ADP/ATP translocase 2;ADP/ATP translocase 2, N-terminally processed	Slc25a4;Slc25a5	sp|P48962|ADT1_MOUSE ADP/ATP translocase 1 OS=Mus musculus OX=10090 GN=Slc25a4 PE=1 SV=4;sp|P51881|ADT2_MOUSE ADP/ATP translocase 2 OS=Mus musculus OX=10090 GN=Slc25a5 PE=1 SV=3	3	4	4	4	0	0	4	0	0	11.7	11.7	32.904	298	298;298;320	0	32.975	11.7	0	0	106000000	106000000	0	106000000	0
P35550;A0A140LIR6	P35550;A0A140LIR6	rRNA 2-O-methyltransferase fibrillarin	Fbl	sp|P35550|FBRL_MOUSE rRNA 2-O-methyltransferase fibrillarin OS=Mus musculus OX=10090 GN=Fbl PE=1 SV=2;tr|A0A140LIR6|A0A140LIR6_MOUSE rRNA 2-O-methyltransferase fibrillarin (Fragment) OS=Mus musculus OX=10090 GN=Fbl PE=1 SV=1	2	2	2	2	0	0	2	0	0	14.1	14.1	34.306	327	327;85	0	31.866	14.1	0	0	12654000	12654000	0	12654000	0
E9PV44;O35143	E9PV44;O35143	ATPase inhibitor, mitochondrial	Atpif1	tr|E9PV44|E9PV44_MOUSE ATP synthase F1 subunit epsilon OS=Mus musculus OX=10090 GN=Atpif1 PE=1 SV=1;sp|O35143|ATIF1_MOUSE ATPase inhibitor, mitochondrial OS=Mus musculus OX=10090 GN=Atp5if1 PE=1 SV=2	2	2	2	2	0	0	2	0	0	21.6	21.6	8.7887	74	74;106	0	30.663	21.6	0	0	70882000	70882000	0	70882000	0
Q8CGF7;A0A494B9W7	Q8CGF7	Transcription elongation regulator 1	Tcerg1	sp|Q8CGF7|TCRG1_MOUSE Transcription elongation regulator 1 OS=Mus musculus OX=10090 GN=Tcerg1 PE=1 SV=2	2	5	5	5	0	0	5	0	0	4.5	4.5	123.79	1100	1100;779	0	29.612	4.5	0	0	27721000	27721000	0	27721000	0
Q3UKJ7	Q3UKJ7	WD40 repeat-containing protein SMU1;WD40 repeat-containing protein SMU1, N-terminally processed	Smu1	sp|Q3UKJ7|SMU1_MOUSE WD40 repeat-containing protein SMU1 OS=Mus musculus OX=10090 GN=Smu1 PE=2 SV=2	1	1	1	1	0	0	1	0	0	2.1	2.1	57.543	513	513	0	29.455	2.1	0	0	0	0	0	0	0
Q9D8N0	Q9D8N0	Elongation factor 1-gamma	Eef1g	sp|Q9D8N0|EF1G_MOUSE Elongation factor 1-gamma OS=Mus musculus OX=10090 GN=Eef1g PE=1 SV=3	1	3	3	3	0	0	3	0	0	7.8	7.8	50.06	437	437	0	29.436	7.8	0	0	304050000	304050000	0	304050000	0
Q9QXB9	Q9QXB9	Developmentally-regulated GTP-binding protein 2	Drg2	sp|Q9QXB9|DRG2_MOUSE Developmentally-regulated GTP-binding protein 2 OS=Mus musculus OX=10090 GN=Drg2 PE=1 SV=1	1	1	1	1	0	0	1	0	0	3.6	3.6	40.718	364	364	0	29.391	3.6	0	0	23018000	23018000	0	23018000	0
A0A0G2JDW7;A0A0G2JG29;Q6ZWU9	A0A0G2JDW7;A0A0G2JG29;Q6ZWU9	40S ribosomal protein S27	Rps27	tr|A0A0G2JDW7|A0A0G2JDW7_MOUSE 40S ribosomal protein S27 (Fragment) OS=Mus musculus OX=10090 GN=Rps27 PE=1 SV=1;tr|A0A0G2JG29|A0A0G2JG29_MOUSE 40S ribosomal protein S27 OS=Mus musculus OX=10090 GN=Rps27 PE=1 SV=1;sp|Q6ZWU9|RS27_MOUSE 40S ribosomal protein	3	1	1	1	0	0	1	0	0	15.9	15.9	9.2327	82	82;83;84	0	29.308	15.9	0	0	8680500	8680500	0	8680500	0
P62918	P62918	60S ribosomal protein L8	Rpl8	sp|P62918|RL8_MOUSE 60S ribosomal protein L8 OS=Mus musculus OX=10090 GN=Rpl8 PE=1 SV=2	1	3	3	3	0	0	3	0	0	11.7	11.7	28.024	257	257	0	28.773	11.7	0	0	27781000	27781000	0	27781000	0
B7ZCU2;B7ZCU5;B7ZCU4;B7ZCU3;B7ZCU0;J3QNK8;Q8CBW3	B7ZCU2;B7ZCU5;B7ZCU4;B7ZCU3;B7ZCU0;J3QNK8;Q8CBW3	Abl interactor 1	Abi1	tr|B7ZCU2|B7ZCU2_MOUSE Abl interactor 1 OS=Mus musculus OX=10090 GN=Abi1 PE=1 SV=1;tr|B7ZCU5|B7ZCU5_MOUSE Abl interactor 1 OS=Mus musculus OX=10090 GN=Abi1 PE=1 SV=1;tr|B7ZCU4|B7ZCU4_MOUSE Abl interactor 1 OS=Mus musculus OX=10090 GN=Abi1 PE=1 SV=1;tr|B7ZC	7	1	1	1	0	0	1	0	0	4.1	4.1	43.174	393	393;422;451;452;480;481;481	0	28.188	4.1	0	0	20028000	20028000	0	20028000	0
P56480	P56480	ATP synthase subunit beta, mitochondrial	Atp5b	sp|P56480|ATPB_MOUSE ATP synthase subunit beta, mitochondrial OS=Mus musculus OX=10090 GN=Atp5f1b PE=1 SV=2	1	4	4	4	0	0	4	0	0	11.2	11.2	56.3	529	529	0	27.877	11.2	0	0	88005000	88005000	0	88005000	0
A0A494B987;Q3U1J4	A0A494B987;Q3U1J4	DNA damage-binding protein 1	Ddb1	tr|A0A494B987|A0A494B987_MOUSE DNA damage-binding protein 1 OS=Mus musculus OX=10090 GN=Ddb1 PE=1 SV=1;sp|Q3U1J4|DDB1_MOUSE DNA damage-binding protein 1 OS=Mus musculus OX=10090 GN=Ddb1 PE=1 SV=2	2	1	1	1	0	0	1	0	0	5.3	5.3	50.58	451	451;1140	0	27.435	5.3	0	0	93505000	93505000	0	93505000	0
Q91VB8;P01942	Q91VB8;P01942	Hemoglobin subunit alpha	haemaglobin alpha 2;Hba	tr|Q91VB8|Q91VB8_MOUSE Alpha globin 1 OS=Mus musculus OX=10090 GN=Hba-a1 PE=1 SV=1;sp|P01942|HBA_MOUSE Hemoglobin subunit alpha OS=Mus musculus OX=10090 GN=Hba PE=1 SV=2	2	4	4	4	0	0	4	0	0	36.6	36.6	15.112	142	142;142	0	26.773	36.6	0	0	416340000	416340000	0	381650000	0
A0A286YEB7;P62849	A0A286YEB7;P62849	40S ribosomal protein S24	Rps24	tr|A0A286YEB7|A0A286YEB7_MOUSE 40S ribosomal protein S24 OS=Mus musculus OX=10090 GN=Rps24 PE=1 SV=1;sp|P62849|RS24_MOUSE 40S ribosomal protein S24 OS=Mus musculus OX=10090 GN=Rps24 PE=1 SV=1	2	3	3	3	0	0	3	0	0	23.7	23.7	13.605	118	118;133	0	26.097	23.7	0	0	326140000	326140000	0	326140000	0
P62264	P62264	40S ribosomal protein S14	Rps14	sp|P62264|RS14_MOUSE 40S ribosomal protein S14 OS=Mus musculus OX=10090 GN=Rps14 PE=1 SV=3	1	3	3	3	0	0	3	0	0	11.3	11.3	16.273	151	151	0	25.823	11.3	0	0	32224000	32224000	0	32224000	0
Q01853	Q01853	Transitional endoplasmic reticulum ATPase	Vcp	sp|Q01853|TERA_MOUSE Transitional endoplasmic reticulum ATPase OS=Mus musculus OX=10090 GN=Vcp PE=1 SV=4	1	4	4	3	1	1	3	1	1	6.1	6.1	89.321	806	806	0	25.561	4.3	1.7	1.7	300330000	64620000	229280000	64620000	0
Q8BFR5;A0A0U1RNQ6;A0A0U1RPC4	Q8BFR5;A0A0U1RNQ6	Elongation factor Tu, mitochondrial	Tufm	sp|Q8BFR5|EFTU_MOUSE Elongation factor Tu, mitochondrial OS=Mus musculus OX=10090 GN=Tufm PE=1 SV=1;tr|A0A0U1RNQ6|A0A0U1RNQ6_MOUSE Elongation factor Tu, mitochondrial (Fragment) OS=Mus musculus OX=10090 GN=Tufm PE=1 SV=1	3	4	4	4	0	0	4	0	0	11.9	11.9	49.508	452	452;118;116	0	25.429	11.9	0	0	68298000	68298000	0	68298000	0
P23116	P23116	Eukaryotic translation initiation factor 3 subunit A	Eif3a	sp|P23116|EIF3A_MOUSE Eukaryotic translation initiation factor 3 subunit A OS=Mus musculus OX=10090 GN=Eif3a PE=1 SV=5	1	3	3	3	0	0	3	0	0	2.2	2.2	161.93	1344	1344	0	25.352	2.2	0	0	44566000	44566000	0	44566000	0
O54724	O54724	Polymerase I and transcript release factor	Ptrf	sp|O54724|CAVN1_MOUSE Caveolae-associated protein 1 OS=Mus musculus OX=10090 GN=Cavin1 PE=1 SV=1	1	4	4	4	0	0	4	0	0	11.7	11.7	43.953	392	392	0	25.195	11.7	0	0	21587000	21587000	0	21587000	0
Q6ZPJ3	Q6ZPJ3	E2/E3 hybrid ubiquitin-protein ligase UBE2O	Ube2o	sp|Q6ZPJ3|UBE2O_MOUSE (E3-independent) E2 ubiquitin-conjugating enzyme UBE2O OS=Mus musculus OX=10090 GN=Ube2o PE=1 SV=3	1	3	3	3	0	0	3	0	0	4	4	140.83	1288	1288	0	25.19	4	0	0	22107000	22107000	0	22107000	0
E9PWX6;A0A494BA95;E9PWM2;A0A494B9X9;E9Q809;F8WH71;E9Q5Y2;E9PUZ3;E9Q1I7;E9Q5J3;G3UW94;Q8BGJ9;Q9D883	E9PWX6;A0A494BA95;E9PWM2;A0A494B9X9;E9Q809;F8WH71;E9Q5Y2;E9PUZ3;E9Q1I7;E9Q5J3;G3UW94;Q8BGJ9;Q9D883	Splicing factor U2AF 26 kDa subunit;Splicing factor U2AF 35 kDa subunit	U2af1l4;U2af1	tr|E9PWX6|E9PWX6_MOUSE Splicing factor U2AF 26 kDa subunit OS=Mus musculus OX=10090 GN=U2af1l4 PE=4 SV=1;tr|A0A494BA95|A0A494BA95_MOUSE Splicing factor U2AF 35 kDa subunit OS=Mus musculus OX=10090 GN=U2af1 PE=4 SV=1;tr|E9PWM2|E9PWM2_MOUSE Splicing factor U	13	1	1	1	0	0	1	0	0	37.8	37.8	3.9143	37	37;45;46;75;102;146;181;187;210;216;239;220;239	0	24.799	37.8	0	0	43199000	43199000	0	43199000	0
F7AA45;E9Q8F0;Q8VH51	F7AA45;E9Q8F0;Q8VH51	RNA-binding protein 39	Rbm39	tr|F7AA45|F7AA45_MOUSE RNA-binding protein 39 (Fragment) OS=Mus musculus OX=10090 GN=Rbm39 PE=1 SV=1;tr|E9Q8F0|E9Q8F0_MOUSE RNA-binding protein 39 OS=Mus musculus OX=10090 GN=Rbm39 PE=1 SV=1;sp|Q8VH51|RBM39_MOUSE RNA-binding protein 39 OS=Mus musculus OX=1	3	2	2	2	0	0	2	0	0	8.7	8.7	33.828	311	311;415;530	0	23.81	8.7	0	0	21855000	21855000	0	21855000	0
P56135;F8WHP8	P56135;F8WHP8	ATP synthase subunit f, mitochondrial	Atp5j2	sp|P56135|ATPK_MOUSE ATP synthase subunit f, mitochondrial OS=Mus musculus OX=10090 GN=Atp5mf PE=1 SV=3;tr|F8WHP8|F8WHP8_MOUSE ATP synthase subunit f, mitochondrial OS=Mus musculus OX=10090 GN=Atp5j2 PE=1 SV=1	2	3	3	3	0	0	3	0	0	25	25	10.344	88	88;76	0	23.242	25	0	0	143420000	143420000	0	143420000	0
Q60817;P70670	Q60817;P70670	Nascent polypeptide-associated complex subunit alpha;Nascent polypeptide-associated complex subunit alpha, muscle-specific form	Naca	sp|Q60817|NACA_MOUSE Nascent polypeptide-associated complex subunit alpha OS=Mus musculus OX=10090 GN=Naca PE=1 SV=1;sp|P70670|NACAM_MOUSE Nascent polypeptide-associated complex subunit alpha, muscle-specific form OS=Mus musculus OX=10090 GN=Naca PE=1 SV=2	2	2	2	2	0	0	2	0	0	12.6	12.6	23.384	215	215;2187	0	22.768	12.6	0	0	28649000	28649000	0	28649000	0
F6RJ39;Q9JIX8;Q52KR6;B8JJ92;B8JJ91	F6RJ39;Q9JIX8;Q52KR6;B8JJ92;B8JJ91	Apoptotic chromatin condensation inducer in the nucleus	Acin1	tr|F6RJ39|F6RJ39_MOUSE Apoptotic chromatin condensation inducer in the nucleus (Fragment) OS=Mus musculus OX=10090 GN=Acin1 PE=1 SV=1;sp|Q9JIX8|ACINU_MOUSE Apoptotic chromatin condensation inducer in the nucleus OS=Mus musculus OX=10090 GN=Acin1 PE=1 SV=3;	5	3	3	3	0	0	3	0	0	3.5	3.5	143.54	1272	1272;1338;552;580;634	0	21.979	3.5	0	0	61235000	61235000	0	61235000	0
Q8VDD5	Q8VDD5	Myosin-9	Myh9	sp|Q8VDD5|MYH9_MOUSE Myosin-9 OS=Mus musculus OX=10090 GN=Myh9 PE=1 SV=4	1	3	3	3	0	0	3	0	0	1.8	1.8	226.37	1960	1960	0	21.845	1.8	0	0	44628000	44628000	0	44628000	0
P97351	P97351	40S ribosomal protein S3a	Rps3a	sp|P97351|RS3A_MOUSE 40S ribosomal protein S3a OS=Mus musculus OX=10090 GN=Rps3a PE=1 SV=3	1	3	3	3	0	0	3	0	0	12.5	12.5	29.885	264	264	0	21.379	12.5	0	0	150340000	150340000	0	150340000	0
Q9JKF1;A0A0U1RNG5	Q9JKF1	Ras GTPase-activating-like protein IQGAP1	Iqgap1	sp|Q9JKF1|IQGA1_MOUSE Ras GTPase-activating-like protein IQGAP1 OS=Mus musculus OX=10090 GN=Iqgap1 PE=1 SV=2	2	3	3	3	0	0	3	0	0	2.5	2.5	188.74	1657	1657;186	0	20.993	2.5	0	0	37635000	37635000	0	37635000	0
H3BL49;P42932;H3BJB6;H3BKR8	H3BL49;P42932;H3BJB6	T-complex protein 1 subunit theta	Cct8	tr|H3BL49|H3BL49_MOUSE T-complex protein 1 subunit theta OS=Mus musculus OX=10090 GN=Cct8 PE=1 SV=1;sp|P42932|TCPQ_MOUSE T-complex protein 1 subunit theta OS=Mus musculus OX=10090 GN=Cct8 PE=1 SV=3;tr|H3BJB6|H3BJB6_MOUSE T-complex protein 1 subunit theta (	4	3	3	3	0	0	3	0	0	7.2	7.2	53.082	489	489;548;239;71	0	20.944	7.2	0	0	15369000	15369000	0	15369000	0
Q8BWT1	Q8BWT1	3-ketoacyl-CoA thiolase, mitochondrial	Acaa2	sp|Q8BWT1|THIM_MOUSE 3-ketoacyl-CoA thiolase, mitochondrial OS=Mus musculus OX=10090 GN=Acaa2 PE=1 SV=3	1	2	2	2	0	0	2	0	0	10.6	10.6	41.829	397	397	0	20.254	10.6	0	0	37910000	37910000	0	37910000	0
F8WHR6;Q569Z5	F8WHR6;Q569Z5	Probable ATP-dependent RNA helicase DDX46	Ddx46	tr|F8WHR6|F8WHR6_MOUSE RNA helicase OS=Mus musculus OX=10090 GN=Ddx46 PE=1 SV=1;sp|Q569Z5|DDX46_MOUSE Probable ATP-dependent RNA helicase DDX46 OS=Mus musculus OX=10090 GN=Ddx46 PE=1 SV=2	2	3	3	3	0	0	3	0	0	3.7	3.7	117	1028	1028;1032	0	20.242	3.7	0	0	3765500	3765500	0	3765500	0
Q9DCT2	Q9DCT2	NADH dehydrogenase [ubiquinone] iron-sulfur protein 3, mitochondrial	Ndufs3	sp|Q9DCT2|NDUS3_MOUSE NADH dehydrogenase [ubiquinone] iron-sulfur protein 3, mitochondrial OS=Mus musculus OX=10090 GN=Ndufs3 PE=1 SV=2	1	2	2	2	0	0	2	0	0	9.1	9.1	30.149	263	263	0	19.777	9.1	0	0	24362000	24362000	0	24362000	0
Q62376;A0A1B0GRR8;A0A1B0GSX5;A0A1B0GR50;A0A1B0GR69;A0A1B0GRV8;A0A1B0GR44	Q62376;A0A1B0GRR8	U1 small nuclear ribonucleoprotein 70 kDa	Snrnp70	sp|Q62376|RU17_MOUSE U1 small nuclear ribonucleoprotein 70 kDa OS=Mus musculus OX=10090 GN=Snrnp70 PE=1 SV=2;tr|A0A1B0GRR8|A0A1B0GRR8_MOUSE U1 small nuclear ribonucleoprotein 70 kDa (Fragment) OS=Mus musculus OX=10090 GN=Snrnp70 PE=1 SV=1	7	3	3	3	0	0	3	0	0	8	8	51.991	448	448;168;84;86;109;111;116	0	19.739	8	0	0	39423000	39423000	0	39423000	0
D3YYM6;D3Z1S8;Q91V55	D3YYM6;D3Z1S8;Q91V55		Rps5	tr|D3YYM6|D3YYM6_MOUSE 40S ribosomal protein S5 (Fragment) OS=Mus musculus OX=10090 GN=Rps5 PE=1 SV=1;tr|D3Z1S8|D3Z1S8_MOUSE 40S ribosomal protein S5 (Fragment) OS=Mus musculus OX=10090 GN=Rps5 PE=1 SV=1;tr|Q91V55|Q91V55_MOUSE 40S ribosomal protein S5 OS=M	3	1	1	1	0	0	1	0	0	8.2	8.2	20.413	182	182;189;204	0	19.3	8.2	0	0	8468400	8468400	0	8468400	0
D3YXU1;Q99JY0	D3YXU1;Q99JY0	Trifunctional enzyme subunit beta, mitochondrial;3-ketoacyl-CoA thiolase	Hadhb	tr|D3YXU1|D3YXU1_MOUSE Trifunctional enzyme subunit beta, mitochondrial (Fragment) OS=Mus musculus OX=10090 GN=Hadhb PE=1 SV=1;sp|Q99JY0|ECHB_MOUSE Trifunctional enzyme subunit beta, mitochondrial OS=Mus musculus OX=10090 GN=Hadhb PE=1 SV=1	2	3	3	3	0	0	3	0	0	22	22	18.966	173	173;475	0	19.281	22	0	0	136290000	136290000	0	136290000	0
P24369	P24369	Peptidyl-prolyl cis-trans isomerase B	Ppib	sp|P24369|PPIB_MOUSE Peptidyl-prolyl cis-trans isomerase B OS=Mus musculus OX=10090 GN=Ppib PE=1 SV=2	1	3	3	3	0	0	3	0	0	16.7	16.7	23.713	216	216	0	19.134	16.7	0	0	74542000	74542000	0	74542000	0
Q9Z0N1;A2AAW9;Q9Z0N2	Q9Z0N1	Eukaryotic translation initiation factor 2 subunit 3, X-linked	Eif2s3x	sp|Q9Z0N1|IF2G_MOUSE Eukaryotic translation initiation factor 2 subunit 3, X-linked OS=Mus musculus OX=10090 GN=Eif2s3x PE=1 SV=2	3	3	3	3	0	0	3	0	0	9.1	9.1	51.065	472	472;344;472	0	18.8	9.1	0	0	34476000	34476000	0	34476000	0
P67984	P67984	60S ribosomal protein L22	Rpl22	sp|P67984|RL22_MOUSE 60S ribosomal protein L22 OS=Mus musculus OX=10090 GN=Rpl22 PE=1 SV=2	1	3	3	3	0	0	3	0	0	21.1	21.1	14.759	128	128	0	18.776	21.1	0	0	132920000	132920000	0	132920000	0
Q921X9	Q921X9	Protein disulfide-isomerase A5	Pdia5	sp|Q921X9|PDIA5_MOUSE Protein disulfide-isomerase A5 OS=Mus musculus OX=10090 GN=Pdia5 PE=1 SV=1	1	3	3	3	0	0	3	0	0	8.7	8.7	59.266	517	517	0	18.554	8.7	0	0	25434000	25434000	0	25434000	0
Q9EQ06	Q9EQ06	Estradiol 17-beta-dehydrogenase 11	Hsd17b11	sp|Q9EQ06|DHB11_MOUSE Estradiol 17-beta-dehydrogenase 11 OS=Mus musculus OX=10090 GN=Hsd17b11 PE=1 SV=1	1	2	2	2	0	0	2	0	0	9.7	9.7	32.88	298	298	0	18.351	9.7	0	0	30522000	30522000	0	30522000	0
D3YVB4;D3Z712;F8WJ41;P62245	D3YVB4;D3Z712;F8WJ41;P62245	40S ribosomal protein S15a	Rps15a	tr|D3YVB4|D3YVB4_MOUSE 40S ribosomal protein S15a (Fragment) OS=Mus musculus OX=10090 GN=Rps15a PE=1 SV=1;tr|D3Z712|D3Z712_MOUSE 40S ribosomal protein S15a (Fragment) OS=Mus musculus OX=10090 GN=Rps15a PE=1 SV=2;tr|F8WJ41|F8WJ41_MOUSE 40S ribosomal protein	4	3	3	3	0	0	3	0	0	43.7	43.7	8.1066	71	71;78;108;130	0	18.236	43.7	0	0	20168000	20168000	0	20168000	0
Q8R1B4;M0QWV3	Q8R1B4	Eukaryotic translation initiation factor 3 subunit C	Eif3c	sp|Q8R1B4|EIF3C_MOUSE Eukaryotic translation initiation factor 3 subunit C OS=Mus musculus OX=10090 GN=Eif3c PE=1 SV=1	2	3	3	3	0	0	3	0	0	3.4	3.4	105.53	911	911;249	0	18.123	3.4	0	0	26831000	26831000	0	26831000	0
P47911;A0A0J9YU32	P47911	60S ribosomal protein L6	Rpl6	sp|P47911|RL6_MOUSE 60S ribosomal protein L6 OS=Mus musculus OX=10090 GN=Rpl6 PE=1 SV=3	2	3	3	3	0	0	3	0	0	11.1	11.1	33.509	296	296;74	0	18.012	11.1	0	0	32836000	32836000	0	32836000	0
Q5SQG5;P67778	Q5SQG5;P67778	Prohibitin	Phb	tr|Q5SQG5|Q5SQG5_MOUSE Prohibitin (Fragment) OS=Mus musculus OX=10090 GN=Phb PE=1 SV=1;sp|P67778|PHB1_MOUSE Prohibitin 1 OS=Mus musculus OX=10090 GN=Phb1 PE=1 SV=1	2	2	2	2	0	0	2	0	0	15	15	22.999	207	207;272	0	17.861	15	0	0	53949000	53949000	0	53949000	0
P11983;A0A3B2WDE2;F2Z483	P11983	T-complex protein 1 subunit alpha	Tcp1	sp|P11983|TCPA_MOUSE T-complex protein 1 subunit alpha OS=Mus musculus OX=10090 GN=Tcp1 PE=1 SV=3	3	3	3	3	0	0	3	0	0	5.2	5.2	60.448	556	556;54;103	0	17.854	5.2	0	0	11937000	11937000	0	11937000	0
Q8CG48	Q8CG48	Structural maintenance of chromosomes protein 2	Smc2	sp|Q8CG48|SMC2_MOUSE Structural maintenance of chromosomes protein 2 OS=Mus musculus OX=10090 GN=Smc2 PE=1 SV=2	1	2	2	2	0	0	2	0	0	2.9	2.9	134.24	1191	1191	0	17.763	2.9	0	0	40205000	40205000	0	40205000	0
Q3UNN4;P97496;Q3UZD0	Q3UNN4;P97496;Q3UZD0	SWI/SNF complex subunit SMARCC1	Smarcc1	tr|Q3UNN4|Q3UNN4_MOUSE SWI/SNF complex subunit SMARCC1 OS=Mus musculus OX=10090 GN=Smarcc1 PE=1 SV=1;sp|P97496|SMRC1_MOUSE SWI/SNF complex subunit SMARCC1 OS=Mus musculus OX=10090 GN=Smarcc1 PE=1 SV=2;tr|Q3UZD0|Q3UZD0_MOUSE SWI/SNF complex subunit SMARCC1	3	2	2	2	0	0	2	0	0	4.1	4.1	122.78	1098	1098;1104;485	0	17.72	4.1	0	0	14815000	14815000	0	14815000	0
Q9D554	Q9D554	Splicing factor 3A subunit 3	Sf3a3	sp|Q9D554|SF3A3_MOUSE Splicing factor 3A subunit 3 OS=Mus musculus OX=10090 GN=Sf3a3 PE=1 SV=2	1	2	2	2	0	0	2	0	0	3.8	3.8	58.841	501	501	0	17.62	3.8	0	0	34816000	34816000	0	34816000	0
Q62261	Q62261	Spectrin beta chain, non-erythrocytic 1	Sptbn1	sp|Q62261|SPTB2_MOUSE Spectrin beta chain, non-erythrocytic 1 OS=Mus musculus OX=10090 GN=Sptbn1 PE=1 SV=2	1	3	3	3	0	0	3	0	0	2.2	2.2	274.22	2363	2363	0	17.383	2.2	0	0	20300000	20300000	0	20300000	0
Q99KP6	Q99KP6	Pre-mRNA-processing factor 19	Prpf19	sp|Q99KP6|PRP19_MOUSE Pre-mRNA-processing factor 19 OS=Mus musculus OX=10090 GN=Prpf19 PE=1 SV=1	1	2	2	2	0	0	2	0	0	7.5	7.5	55.238	504	504	0	17.371	7.5	0	0	35093000	35093000	0	35093000	0
A0A1W2P6X1;E9QKG6;A0A0G2JDZ9;E9Q804;Q99NH0	A0A1W2P6X1;E9QKG6;A0A0G2JDZ9;E9Q804;Q99NH0	Ankyrin repeat domain-containing protein 17	Ankrd17	tr|A0A1W2P6X1|A0A1W2P6X1_MOUSE Ankyrin repeat domain-containing protein 17 OS=Mus musculus OX=10090 GN=Ankrd17 PE=1 SV=1;tr|E9QKG6|E9QKG6_MOUSE Ankyrin repeat domain-containing protein 17 OS=Mus musculus OX=10090 GN=Ankrd17 PE=1 SV=1;tr|A0A0G2JDZ9|A0A0G2JD	5	1	1	1	0	0	1	0	0	0.8	0.8	170.43	1600	1600;2352;2494;2602;2603	0	17.356	0.8	0	0	0	0	0	0	0
P62242	P62242	40S ribosomal protein S8	Rps8	sp|P62242|RS8_MOUSE 40S ribosomal protein S8 OS=Mus musculus OX=10090 GN=Rps8 PE=1 SV=2	1	3	3	3	0	0	3	0	0	15.9	15.9	24.205	208	208	0	17.346	15.9	0	0	16988000	16988000	0	16988000	0
Q8K310;A0A494BAZ7;A0A494BAD4;A0A494BAZ2;A0A494B9X1	Q8K310;A0A494BAZ7;A0A494BAD4	Matrin-3	Matr3	sp|Q8K310|MATR3_MOUSE Matrin-3 OS=Mus musculus OX=10090 GN=Matr3 PE=1 SV=1;tr|A0A494BAZ7|A0A494BAZ7_MOUSE Matrin-3 OS=Mus musculus OX=10090 GN=Matr3 PE=1 SV=1;tr|A0A494BAD4|A0A494BAD4_MOUSE Matrin-3 OS=Mus musculus OX=10090 GN=Matr3 PE=1 SV=1	5	3	3	3	0	0	3	0	0	5.2	5.2	94.629	846	846;508;558;385;403	0	17.338	5.2	0	0	7213600	7213600	0	7213600	0
A0A1L1SRL0;A0A1L1STF9;Q8CH25	A0A1L1SRL0;A0A1L1STF9;Q8CH25	SAFB-like transcription modulator	Sltm	tr|A0A1L1SRL0|A0A1L1SRL0_MOUSE SAFB-like transcription modulator OS=Mus musculus OX=10090 GN=Sltm PE=1 SV=1;tr|A0A1L1STF9|A0A1L1STF9_MOUSE SAFB-like transcription modulator OS=Mus musculus OX=10090 GN=Sltm PE=1 SV=1;sp|Q8CH25|SLTM_MOUSE SAFB-like transcrip	3	2	2	2	0	0	2	0	0	32.3	32.3	6.6177	62	62;664;1031	0	17.307	32.3	0	0	9159100	9159100	0	9159100	0
Q8R2P8;Q99MN1	Q8R2P8;Q99MN1	Lysine--tRNA ligase	Kars	tr|Q8R2P8|Q8R2P8_MOUSE Lysine--tRNA ligase OS=Mus musculus OX=10090 GN=Kars PE=1 SV=1;sp|Q99MN1|SYK_MOUSE Lysine--tRNA ligase OS=Mus musculus OX=10090 GN=Kars1 PE=1 SV=1	2	3	3	3	0	0	3	0	0	4	4	71.29	624	624;595	0	17.151	4	0	0	31452000	31452000	0	31452000	0
Q8JZQ9	Q8JZQ9	Eukaryotic translation initiation factor 3 subunit B	Eif3b	sp|Q8JZQ9|EIF3B_MOUSE Eukaryotic translation initiation factor 3 subunit B OS=Mus musculus OX=10090 GN=Eif3b PE=1 SV=1	1	2	2	2	0	0	2	0	0	4.7	4.7	91.369	803	803	0	16.844	4.7	0	0	22395000	22395000	0	22395000	0
Q9Z1D1	Q9Z1D1	Eukaryotic translation initiation factor 3 subunit G	Eif3g	sp|Q9Z1D1|EIF3G_MOUSE Eukaryotic translation initiation factor 3 subunit G OS=Mus musculus OX=10090 GN=Eif3g PE=1 SV=2	1	2	2	2	0	0	2	0	0	6.9	6.9	35.638	320	320	0	16.594	6.9	0	0	11441000	11441000	0	11441000	0
A0A8I4SYN6;A0A1W2P768;P84228;P68433;E0CZ27;F8WI35;P84244;P02301	A0A8I4SYN6;A0A1W2P768;P84228;P68433;E0CZ27;F8WI35;P84244;P02301	Histone H3.2;Histone H3.1;Histone H3;Histone H3.3;Histone H3.3C	Hist1h3b;Hist1h3a;H3f3a;H3f3c	tr|A0A8I4SYN6|A0A8I4SYN6_MOUSE H3.4 histone OS=Mus musculus OX=10090 GN=H3f4 PE=4 SV=1;tr|A0A1W2P768|A0A1W2P768_MOUSE Histone H3.2 OS=Mus musculus OX=10090 GN=H3c14 PE=1 SV=1;sp|P84228|H32_MOUSE Histone H3.2 OS=Mus musculus OX=10090 GN=H3c2 PE=1 SV=2;sp|P6	8	2	2	2	0	0	2	0	0	14.7	14.7	15.429	136	136;181;136;136;119;135;136;136	0	16.571	14.7	0	0	114020000	114020000	0	114020000	0
P17427;A0A140LHG0;P17426	P17427;A0A140LHG0;P17426	AP-2 complex subunit alpha-2;AP-2 complex subunit alpha-1	Ap2a2;Ap2a1	sp|P17427|AP2A2_MOUSE AP-2 complex subunit alpha-2 OS=Mus musculus OX=10090 GN=Ap2a2 PE=1 SV=2;tr|A0A140LHG0|A0A140LHG0_MOUSE AP-2 complex subunit alpha-1 OS=Mus musculus OX=10090 GN=Ap2a1 PE=4 SV=1;sp|P17426|AP2A1_MOUSE AP-2 complex subunit alpha-1 OS=Mus	3	2	2	2	0	0	2	0	0	2.3	2.3	104.02	938	938;38;977	0	16.535	2.3	0	0	22196000	22196000	0	18448000	0
A0A0G2JEP0;Q61584;A0A0G2JGL6;A0A0H2UH27	A0A0G2JEP0;Q61584;A0A0G2JGL6;A0A0H2UH27	Fragile X mental retardation syndrome-related protein 1	Fxr1	tr|A0A0G2JEP0|A0A0G2JEP0_MOUSE Fragile X mental retardation syndrome-related protein 1 OS=Mus musculus OX=10090 GN=Fxr1 PE=1 SV=1;sp|Q61584|FXR1_MOUSE Fragile X mental retardation syndrome-related protein 1 OS=Mus musculus OX=10090 GN=Fxr1 PE=1 SV=2;tr|A0A	4	2	2	2	0	0	2	0	0	5.5	5.5	63.915	568	568;677;133;454	0	16.198	5.5	0	0	12348000	12348000	0	12348000	0
P49586;Q811Q9;D3Z3T5	P49586;Q811Q9;D3Z3T5	Choline-phosphate cytidylyltransferase A;Choline-phosphate cytidylyltransferase B	Pcyt1a;Pcyt1b	sp|P49586|PCY1A_MOUSE Choline-phosphate cytidylyltransferase A OS=Mus musculus OX=10090 GN=Pcyt1a PE=1 SV=1;sp|Q811Q9|PCY1B_MOUSE Choline-phosphate cytidylyltransferase B OS=Mus musculus OX=10090 GN=Pcyt1b PE=1 SV=2;tr|D3Z3T5|D3Z3T5_MOUSE Choline-phosphate	3	2	2	2	0	0	2	0	0	7.6	7.6	41.666	367	367;369;265	0	16.173	7.6	0	0	73008000	73008000	0	73008000	0
Q9CU62	Q9CU62	Structural maintenance of chromosomes protein 1A	Smc1a	sp|Q9CU62|SMC1A_MOUSE Structural maintenance of chromosomes protein 1A OS=Mus musculus OX=10090 GN=Smc1a PE=1 SV=4	1	2	2	2	0	0	2	0	0	2.8	2.8	143.23	1233	1233	0	15.697	2.8	0	0	17012000	17012000	0	17012000	0
Q9CW03	Q9CW03	Structural maintenance of chromosomes protein 3	Smc3	sp|Q9CW03|SMC3_MOUSE Structural maintenance of chromosomes protein 3 OS=Mus musculus OX=10090 GN=Smc3 PE=1 SV=2	1	1	1	1	0	0	1	0	0	1.2	1.2	141.55	1217	1217	0	15.223	1.2	0	0	13798000	13798000	0	13798000	0
P14869;S4R1N1	P14869;S4R1N1	60S acidic ribosomal protein P0	Rplp0	sp|P14869|RLA0_MOUSE 60S acidic ribosomal protein P0 OS=Mus musculus OX=10090 GN=Rplp0 PE=1 SV=3;tr|S4R1N1|S4R1N1_MOUSE 60S acidic ribosomal protein P0 (Fragment) OS=Mus musculus OX=10090 GN=Rplp0 PE=1 SV=1	2	2	2	2	0	0	2	0	0	9.5	9.5	34.216	317	317;221	0	15.117	9.5	0	0	37626000	37626000	0	37626000	0
E9Q405;A0A1C7ZN10;K3W4L0;B2RRE2;E9QAX2;Q9JMH9	E9Q405;A0A1C7ZN10;K3W4L0;B2RRE2;E9QAX2;Q9JMH9	Unconventional myosin-XVIIIa	Myo18a	tr|E9Q405|E9Q405_MOUSE Unconventional myosin-XVIIIa OS=Mus musculus OX=10090 GN=Myo18a PE=1 SV=1;tr|A0A1C7ZN10|A0A1C7ZN10_MOUSE Unconventional myosin-XVIIIa OS=Mus musculus OX=10090 GN=Myo18a PE=1 SV=1;tr|K3W4L0|K3W4L0_MOUSE Unconventional myosin-XVIIIa OS	6	1	1	1	0	0	1	0	0	1.2	1.2	193.64	1700	1700;1722;2036;2047;2083;2050	0	14.699	1.2	0	0	0	0	0	0	0
Q6ZWX6	Q6ZWX6	Eukaryotic translation initiation factor 2 subunit 1	Eif2s1	sp|Q6ZWX6|IF2A_MOUSE Eukaryotic translation initiation factor 2 subunit 1 OS=Mus musculus OX=10090 GN=Eif2s1 PE=1 SV=3	1	2	2	2	0	0	2	0	0	9.2	9.2	36.108	315	315	0	14.535	9.2	0	0	94864000	94864000	0	94864000	0
Q9Z2I8	Q9Z2I8	Succinyl-CoA ligase [GDP-forming] subunit beta, mitochondrial	Suclg2	sp|Q9Z2I8|SUCB2_MOUSE Succinate--CoA ligase [GDP-forming] subunit beta, mitochondrial OS=Mus musculus OX=10090 GN=Suclg2 PE=1 SV=3	1	2	2	2	0	0	2	0	0	6.5	6.5	46.839	433	433	0	14.517	6.5	0	0	5663100	5663100	0	5663100	0
V9GXI0;V9GXT7;Q9Z266	V9GXI0;V9GXT7;Q9Z266	SNARE-associated protein Snapin	Snapin	tr|V9GXI0|V9GXI0_MOUSE SNARE-associated protein Snapin OS=Mus musculus OX=10090 GN=Snapin PE=1 SV=1;tr|V9GXT7|V9GXT7_MOUSE SNARE-associated protein Snapin OS=Mus musculus OX=10090 GN=Snapin PE=1 SV=1;sp|Q9Z266|SNAPN_MOUSE SNARE-associated protein Snapin OS	3	1	1	1	0	0	1	0	0	39.6	39.6	5.3409	53	53;56;136	0	14.505	39.6	0	0	2710100	2710100	0	2710100	0
Q05CL8	Q05CL8	La-related protein 7	Larp7	sp|Q05CL8|LARP7_MOUSE La-related protein 7 OS=Mus musculus OX=10090 GN=Larp7 PE=1 SV=2	1	1	1	1	0	0	1	0	0	2.1	2.1	64.802	570	570	0	14.497	2.1	0	0	0	0	0	0	0
D3YUQ9;E9QN08;Q80T06;P57776;D3Z7N2;D3YY68;D3YZT9;A0A0R4J1L2;Q91VK2;A0A0R4J1E2	D3YUQ9;E9QN08;Q80T06;P57776;D3Z7N2;D3YY68;D3YZT9;A0A0R4J1L2;Q91VK2;A0A0R4J1E2	Elongation factor 1-delta	Eef1d	tr|D3YUQ9|D3YUQ9_MOUSE Elongation factor 1-delta (Fragment) OS=Mus musculus OX=10090 GN=Eef1d PE=1 SV=8;tr|E9QN08|E9QN08_MOUSE Elongation factor 1-delta (Fragment) OS=Mus musculus OX=10090 GN=Eef1d PE=1 SV=1;tr|Q80T06|Q80T06_MOUSE Elongation factor 1-delta	10	2	2	2	0	0	2	0	0	17.1	17.1	21.478	193	193;245;281;281;129;190;210;257;276;660	0	14.381	17.1	0	0	25042000	25042000	0	25042000	0
A0A0N4SW73;Q8R361	A0A0N4SW73;Q8R361	Rab11 family-interacting protein 5	Rab11fip5	tr|A0A0N4SW73|A0A0N4SW73_MOUSE Rab11 family-interacting protein 5 OS=Mus musculus OX=10090 GN=Rab11fip5 PE=1 SV=1;sp|Q8R361|RFIP5_MOUSE Rab11 family-interacting protein 5 OS=Mus musculus OX=10090 GN=Rab11fip5 PE=1 SV=2	2	2	2	2	0	0	2	0	0	3.3	3.3	139.55	1318	1318;645	0	14.348	3.3	0	0	7606500	7606500	0	7606500	0
G3UYV7;P62858	G3UYV7;P62858	40S ribosomal protein S28	Rps28	tr|G3UYV7|G3UYV7_MOUSE 40S ribosomal protein S28 (Fragment) OS=Mus musculus OX=10090 GN=Rps28 PE=1 SV=1;sp|P62858|RS28_MOUSE 40S ribosomal protein S28 OS=Mus musculus OX=10090 GN=Rps28 PE=1 SV=1	2	1	1	1	0	0	1	0	0	21.4	21.4	6.3442	56	56;69	0	14.205	21.4	0	0	0	0	0	0	0
A0A087WP98;A0A087WPN6;A0A087WQN2;P26350	A0A087WP98;A0A087WPN6;A0A087WQN2;P26350	Prothymosin alpha;Prothymosin alpha, N-terminally processed;Thymosin alpha	Ptma	tr|A0A087WP98|A0A087WP98_MOUSE Prothymosin alpha OS=Mus musculus OX=10090 GN=Ptma PE=1 SV=1;tr|A0A087WPN6|A0A087WPN6_MOUSE Prothymosin alpha OS=Mus musculus OX=10090 GN=Ptma PE=1 SV=1;tr|A0A087WQN2|A0A087WQN2_MOUSE Prothymosin alpha (Fragment) OS=Mus muscu	4	1	1	1	0	0	1	0	0	24.1	24.1	6.4913	58	58;98;145;111	0	14.161	24.1	0	0	50287000	50287000	0	50287000	0
P62267	P62267	40S ribosomal protein S23	Rps23	sp|P62267|RS23_MOUSE 40S ribosomal protein S23 OS=Mus musculus OX=10090 GN=Rps23 PE=1 SV=3	1	2	2	2	0	0	2	0	0	8.4	8.4	15.807	143	143	0	14.139	8.4	0	0	33884000	33884000	0	33884000	0
G3X9I4;Q9JJW6;O08583	G3X9I4;Q9JJW6;O08583	Aly/REF export factor 2;THO complex subunit 4	Alyref2;Alyref	tr|G3X9I4|G3X9I4_MOUSE Aly/REF export factor 2 OS=Mus musculus OX=10090 GN=Alyref2 PE=1 SV=1;sp|Q9JJW6|ALRF2_MOUSE Aly/REF export factor 2 OS=Mus musculus OX=10090 GN=Alyref2 PE=1 SV=1;sp|O08583|THOC4_MOUSE THO complex subunit 4 OS=Mus musculus OX=10090 GN	3	2	2	2	0	0	2	0	0	11	11	23.785	218	218;218;255	0	13.872	11	0	0	61772000	61772000	0	61772000	0
Q8CBB6;Q8CGP2;Q8CGP1;Q6ZWY9;Q64525;Q64478;Q64475;P10854;P10853;Q9D2U9;Q8CGP0;Q64524;P70696	Q8CBB6;Q8CGP2;Q8CGP1;Q6ZWY9;Q64525;Q64478;Q64475;P10854;P10853;Q9D2U9;Q8CGP0;Q64524;P70696	Histone H2B;Histone H2B type 1-P;Histone H2B type 1-K;Histone H2B type 1-C/E/G;Histone H2B type 2-B;Histone H2B type 1-H;Histone H2B type 1-B;Histone H2B type 1-M;Histone H2B type 1-F/J/L;Histone H2B type 3-A;Histone H2B type 3-B;Histone H2B type 2-E;Histone H2B type 1-A	Hist1h2br;Hist1h2bp;Hist1h2bk;Hist1h2bc;Hist2h2bb;Hist1h2bh;Hist1h2bb;Hist1h2bm;Hist1h2bf;Hist3h2ba;Hist3h2bb;Hist2h2be;Hist1h2ba	tr|Q8CBB6|Q8CBB6_MOUSE Histone H2B OS=Mus musculus OX=10090 GN=H2bc24 PE=2 SV=1;sp|Q8CGP2|H2B1P_MOUSE Histone H2B type 1-P OS=Mus musculus OX=10090 GN=Hist1h2bp PE=1 SV=3;sp|Q8CGP1|H2B1K_MOUSE Histone H2B type 1-K OS=Mus musculus OX=10090 GN=H2bc12 PE=1 SV	13	2	2	2	0	0	2	0	0	14.2	14.2	14.888	134	134;126;126;126;126;126;126;126;126;126;126;126;127	0	13.67	14.2	0	0	313230000	313230000	0	313230000	0
A2AAN2;Q8BMA6	A2AAN2;Q8BMA6	Signal recognition particle subunit SRP68	Srp68	tr|A2AAN2|A2AAN2_MOUSE Signal recognition particle subunit SRP68 OS=Mus musculus OX=10090 GN=Srp68 PE=1 SV=1;sp|Q8BMA6|SRP68_MOUSE Signal recognition particle subunit SRP68 OS=Mus musculus OX=10090 GN=Srp68 PE=1 SV=2	2	1	1	1	0	0	1	0	0	1.9	1.9	65.952	587	587;625	0	13.668	1.9	0	0	0	0	0	0	0
A0A2I3BQ25;A0A2I3BRG8;A0A2I3BPY3;Q9D2U3;Q99LB2	A0A2I3BQ25;A0A2I3BRG8;A0A2I3BPY3;Q9D2U3;Q99LB2	Dehydrogenase/reductase SDR family member 4	Dhrs4	tr|A0A2I3BQ25|A0A2I3BQ25_MOUSE Dehydrogenase/reductase SDR family member 4 (Fragment) OS=Mus musculus OX=10090 GN=Dhrs4 PE=1 SV=1;tr|A0A2I3BRG8|A0A2I3BRG8_MOUSE Dehydrogenase/reductase SDR family member 4 (Fragment) OS=Mus musculus OX=10090 GN=Dhrs4 PE=1 S	5	2	2	2	0	0	2	0	0	25	25	13.189	124	124;179;194;216;279	0	13.565	25	0	0	17446000	17446000	0	17446000	0
Q80UE5;O70318;A0A1W2P6I5;Q80UE4;Q8C928	Q80UE5;O70318;A0A1W2P6I5;Q80UE4;Q8C928	Band 4.1-like protein 2	Epb4.1l2;Epb41l2	tr|Q80UE5|Q80UE5_MOUSE Band 4.1-like protein 2 OS=Mus musculus OX=10090 GN=Epb41l2 PE=1 SV=1;sp|O70318|E41L2_MOUSE Band 4.1-like protein 2 OS=Mus musculus OX=10090 GN=Epb41l2 PE=1 SV=2;tr|A0A1W2P6I5|A0A1W2P6I5_MOUSE Band 4.1-like protein 2 (Fragment) OS=Mu	5	2	2	2	0	0	2	0	0	2.9	2.9	101.81	918	918;988;513;794;806	0	13.403	2.9	0	0	24856000	24856000	0	24856000	0
Q3TJ56;Q78PY7	Q3TJ56;Q78PY7	Staphylococcal nuclease domain-containing protein 1	Snd1	tr|Q3TJ56|Q3TJ56_MOUSE Staphylococcal nuclease domain-containing protein 1 OS=Mus musculus OX=10090 GN=Snd1 PE=1 SV=1;sp|Q78PY7|SND1_MOUSE Staphylococcal nuclease domain-containing protein 1 OS=Mus musculus OX=10090 GN=Snd1 PE=1 SV=1	2	2	2	2	0	0	2	0	0	4.3	4.3	67.692	608	608;910	0	13.275	4.3	0	0	23747000	23747000	0	23747000	0
Q3TWW8	Q3TWW8	Serine/arginine-rich splicing factor 6	Srsf6	sp|Q3TWW8|SRSF6_MOUSE Serine/arginine-rich splicing factor 6 OS=Mus musculus OX=10090 GN=Srsf6 PE=1 SV=1	1	2	1	2	0	0	1	0	0	5.3	2.7	39.025	339	339	0	13.173	5.3	0	0	17506000	17506000	0	17506000	0
P62806	P62806	Histone H4	Hist1h4a	sp|P62806|H4_MOUSE Histone H4 OS=Mus musculus OX=10090 GN=H4c1 PE=1 SV=2	1	2	2	2	0	0	2	0	0	20.4	20.4	11.367	103	103	0	13.099	20.4	0	0	15515000	15515000	0	14125000	0
A0A0J9YTY0;A0A0J9YUL3;Q8C1B7;A0A0J9YVA6	A0A0J9YTY0;A0A0J9YUL3;Q8C1B7;A0A0J9YVA6	Septin-11	Sept11	tr|A0A0J9YTY0|A0A0J9YTY0_MOUSE Septin OS=Mus musculus OX=10090 GN=Septin11 PE=1 SV=1;tr|A0A0J9YUL3|A0A0J9YUL3_MOUSE Septin OS=Mus musculus OX=10090 GN=Septin11 PE=1 SV=1;sp|Q8C1B7|SEP11_MOUSE Septin-11 OS=Mus musculus OX=10090 GN=Septin11 PE=1 SV=4;tr|A0A0	4	2	2	2	0	0	2	0	0	6.8	6.8	48.978	425	425;432;431;204	0	12.973	6.8	0	0	28078000	28078000	0	28078000	0
A0A1W2P7L7;P59708	A0A1W2P7L7;P59708	Splicing factor 3B subunit 6	Sf3b6	tr|A0A1W2P7L7|A0A1W2P7L7_MOUSE Splicing factor 3B subunit 6 (Fragment) OS=Mus musculus OX=10090 GN=Sf3b6 PE=1 SV=1;sp|P59708|SF3B6_MOUSE Splicing factor 3B subunit 6 OS=Mus musculus OX=10090 GN=Sf3b6 PE=1 SV=1	2	2	2	2	0	0	2	0	0	23.4	23.4	13.037	111	111;125	0	12.906	23.4	0	0	51406000	51406000	0	51406000	0
P07724	P07724	Serum albumin	Alb	sp|P07724|ALBU_MOUSE Albumin OS=Mus musculus OX=10090 GN=Alb PE=1 SV=3	1	2	2	2	0	0	2	0	0	4.1	4.1	68.692	608	608	0	12.877	4.1	0	0	1521900	1521900	0	1521900	0
A0A2I3BQF4;P62889	A0A2I3BQF4;P62889	60S ribosomal protein L30	Rpl30	tr|A0A2I3BQF4|A0A2I3BQF4_MOUSE 60S ribosomal protein L30 OS=Mus musculus OX=10090 GN=Rpl30 PE=1 SV=1;sp|P62889|RL30_MOUSE 60S ribosomal protein L30 OS=Mus musculus OX=10090 GN=Rpl30 PE=1 SV=2	2	2	2	2	0	0	2	0	0	29.8	29.8	10.457	94	94;115	0	12.869	29.8	0	0	20472000	20472000	0	20472000	0
Q9DCC5;P23198;D3Z1A9;D3Z313;Q7TPM0;Q9CYJ8;P83917	Q9DCC5;P23198;D3Z1A9;D3Z313;Q7TPM0;Q9CYJ8;P83917	Chromobox protein homolog 3;Chromobox protein homolog 1	Cbx3;Cbx1	tr|Q9DCC5|Q9DCC5_MOUSE Cbx3 protein OS=Mus musculus OX=10090 GN=Cbx3 PE=1 SV=1;sp|P23198|CBX3_MOUSE Chromobox protein homolog 3 OS=Mus musculus OX=10090 GN=Cbx3 PE=1 SV=2;tr|D3Z1A9|D3Z1A9_MOUSE Chromobox protein homolog 3 OS=Mus musculus OX=10090 GN=Cbx3 P	7	2	2	2	0	0	2	0	0	16.4	16.4	20.811	183	183;183;71;110;138;150;185	0	12.856	16.4	0	0	27815000	27815000	0	27815000	0
A0A0G2JFJ6;Q7TPD0	A0A0G2JFJ6;Q7TPD0	Integrator complex subunit 3	Ints3	tr|A0A0G2JFJ6|A0A0G2JFJ6_MOUSE Integrator complex subunit 3 OS=Mus musculus OX=10090 GN=Ints3 PE=1 SV=1;sp|Q7TPD0|INT3_MOUSE Integrator complex subunit 3 OS=Mus musculus OX=10090 GN=Ints3 PE=1 SV=2	2	2	2	2	0	0	2	0	0	4.6	4.6	117.25	1035	1035;1041	0	12.855	4.6	0	0	17354000	17354000	0	17354000	0
Q9D8E6	Q9D8E6	60S ribosomal protein L4	Rpl4	sp|Q9D8E6|RL4_MOUSE 60S ribosomal protein L4 OS=Mus musculus OX=10090 GN=Rpl4 PE=1 SV=3	1	2	2	2	0	0	2	0	0	7.4	7.4	47.153	419	419	0	12.851	7.4	0	0	29052000	29052000	0	29052000	0
P19324;A0A140LHR4	P19324;A0A140LHR4	Serpin H1	Serpinh1	sp|P19324|SERPH_MOUSE Serpin H1 OS=Mus musculus OX=10090 GN=Serpinh1 PE=1 SV=3;tr|A0A140LHR4|A0A140LHR4_MOUSE Serpin H1 (Fragment) OS=Mus musculus OX=10090 GN=Serpinh1 PE=1 SV=1	2	2	2	2	0	0	2	0	0	6.7	6.7	46.533	417	417;203	0	12.74	6.7	0	0	24183000	24183000	0	24183000	0
P60122	P60122	RuvB-like 1	Ruvbl1	sp|P60122|RUVB1_MOUSE RuvB-like 1 OS=Mus musculus OX=10090 GN=Ruvbl1 PE=1 SV=1	1	2	2	2	0	0	2	0	0	6.4	6.4	50.213	456	456	0	12.676	6.4	0	0	15129000	15129000	0	15129000	0
Q6NS54;A0A0R4IZX2;A0A3Q4EHM9;A0A0R4J006;A0A3Q4EBU8;Q9JHL1	Q6NS54;A0A0R4IZX2;A0A3Q4EHM9;A0A0R4J006;A0A3Q4EBU8;Q9JHL1	Na(+)/H(+) exchange regulatory cofactor NHE-RF;Na(+)/H(+) exchange regulatory cofactor NHE-RF2	Slc9a3r2	tr|Q6NS54|Q6NS54_MOUSE Na(+)/H(+) exchange regulatory cofactor NHE-RF OS=Mus musculus OX=10090 GN=Slc9a3r2 PE=1 SV=1;tr|A0A0R4IZX2|A0A0R4IZX2_MOUSE Na(+)/H(+) exchange regulatory cofactor NHE-RF OS=Mus musculus OX=10090 GN=Slc9a3r2 PE=1 SV=1;tr|A0A3Q4EHM9|	6	2	2	2	0	0	2	0	0	7.3	7.3	35.299	316	316;337;205;226;231;337	0	12.67	7.3	0	0	5693400	5693400	0	5693400	0
P43276	P43276	Histone H1.5	Hist1h1b	sp|P43276|H15_MOUSE Histone H1.5 OS=Mus musculus OX=10090 GN=H1-5 PE=1 SV=2	1	2	2	2	0	0	2	0	0	13	13	22.576	223	223	0	12.64	13	0	0	20969000	20969000	0	20969000	0
O54734	O54734	Dolichyl-diphosphooligosaccharide--protein glycosyltransferase 48 kDa subunit	Ddost	sp|O54734|OST48_MOUSE Dolichyl-diphosphooligosaccharide--protein glycosyltransferase 48 kDa subunit OS=Mus musculus OX=10090 GN=Ddost PE=1 SV=2	1	2	2	2	0	0	2	0	0	4.5	4.5	49.027	441	441	0	12.556	4.5	0	0	11098000	11098000	0	11098000	0
M0QWF0;Q9JMD0	M0QWF0;Q9JMD0	BUB3-interacting and GLEBS motif-containing protein ZNF207	Zfp207;Znf207	tr|M0QWF0|M0QWF0_MOUSE Zinc finger protein 207 (Fragment) OS=Mus musculus OX=10090 GN=Zfp207 PE=1 SV=1;sp|Q9JMD0|ZN207_MOUSE BUB3-interacting and GLEBS motif-containing protein ZNF207 OS=Mus musculus OX=10090 GN=Znf207 PE=1 SV=1	2	2	2	2	0	0	2	0	0	4.1	4.1	35.072	342	342;495	0	12.468	4.1	0	0	17839000	17839000	0	17839000	0
P54276	P54276	DNA mismatch repair protein Msh6	Msh6	sp|P54276|MSH6_MOUSE DNA mismatch repair protein Msh6 OS=Mus musculus OX=10090 GN=Msh6 PE=1 SV=3	1	2	2	2	0	0	2	0	0	2.2	2.2	151.08	1358	1358	0	12.448	2.2	0	0	21301000	21301000	0	21301000	0
B1AUB6;B1AUB8;B1AUB9;B1AUC0;Q02780	B1AUB6;B1AUB8;B1AUB9;B1AUC0;Q02780	Nuclear factor 1;Nuclear factor 1 A-type	Nfia	tr|B1AUB6|B1AUB6_MOUSE Nuclear factor 1 (Fragment) OS=Mus musculus OX=10090 GN=Nfia PE=1 SV=1;tr|B1AUB8|B1AUB8_MOUSE Nuclear factor 1 OS=Mus musculus OX=10090 GN=Nfia PE=1 SV=1;tr|B1AUB9|B1AUB9_MOUSE Nuclear factor 1 OS=Mus musculus OX=10090 GN=Nfia PE=1 S	5	2	2	2	0	0	2	0	0	13.8	13.8	25.912	225	225;380;487;498;532	0	12.419	13.8	0	0	17577000	17577000	0	17577000	0
A2AIR2;Q5DTM8;A2AIR1;A2AIR0	A2AIR2;Q5DTM8;A2AIR1;A2AIR0	E3 ubiquitin-protein ligase BRE1A	Rnf20	tr|A2AIR2|A2AIR2_MOUSE E3 ubiquitin protein ligase (Fragment) OS=Mus musculus OX=10090 GN=Rnf20 PE=1 SV=1;sp|Q5DTM8|BRE1A_MOUSE E3 ubiquitin-protein ligase BRE1A OS=Mus musculus OX=10090 GN=Rnf20 PE=1 SV=2;tr|A2AIR1|A2AIR1_MOUSE E3 ubiquitin protein ligase	4	2	2	2	0	0	2	0	0	4.5	4.5	70.389	606	606;973;117;174	0	12.409	4.5	0	0	10942000	10942000	0	10942000	0
A2AVJ7;Q99PL5	A2AVJ7;Q99PL5	Ribosome-binding protein 1	Rrbp1	tr|A2AVJ7|A2AVJ7_MOUSE Ribosome-binding protein 1 OS=Mus musculus OX=10090 GN=Rrbp1 PE=1 SV=1;sp|Q99PL5|RRBP1_MOUSE Ribosome-binding protein 1 OS=Mus musculus OX=10090 GN=Rrbp1 PE=1 SV=2	2	2	2	2	0	0	2	0	0	1.4	1.4	158.39	1464	1464;1605	0	12.363	1.4	0	0	11906000	11906000	0	11906000	0
O70194	O70194	Eukaryotic translation initiation factor 3 subunit D	Eif3d	sp|O70194|EIF3D_MOUSE Eukaryotic translation initiation factor 3 subunit D OS=Mus musculus OX=10090 GN=Eif3d PE=1 SV=2	1	2	2	2	0	0	2	0	0	2.7	2.7	63.988	548	548	0	12.343	2.7	0	0	24337000	24337000	0	24337000	0
P80314;A0A1W2P6Q3;A0A1W2P7B7	P80314;A0A1W2P6Q3;A0A1W2P7B7	T-complex protein 1 subunit beta	Cct2	sp|P80314|TCPB_MOUSE T-complex protein 1 subunit beta OS=Mus musculus OX=10090 GN=Cct2 PE=1 SV=4;tr|A0A1W2P6Q3|A0A1W2P6Q3_MOUSE T-complex protein 1 subunit beta OS=Mus musculus OX=10090 GN=Cct2 PE=1 SV=1;tr|A0A1W2P7B7|A0A1W2P7B7_MOUSE T-complex protein 1 s	3	2	2	2	0	0	2	0	0	6.4	6.4	57.477	535	535;181;217	0	12.221	6.4	0	0	59941000	59941000	0	59941000	0
Q8BX02	Q8BX02	KN motif and ankyrin repeat domain-containing protein 2	Kank2	sp|Q8BX02|KANK2_MOUSE KN motif and ankyrin repeat domain-containing protein 2 OS=Mus musculus OX=10090 GN=Kank2 PE=1 SV=1	1	2	2	2	0	0	2	0	0	4	4	90.244	843	843	0	12.149	4	0	0	19051000	19051000	0	19051000	0
F6RBR6;A0A0R4J275;Q7TMF3	F6RBR6;A0A0R4J275;Q7TMF3	NADH dehydrogenase [ubiquinone] 1 alpha subcomplex subunit 12	Ndufa12	tr|F6RBR6|F6RBR6_MOUSE NADH dehydrogenase [ubiquinone] 1 alpha subcomplex subunit 12 OS=Mus musculus OX=10090 GN=Ndufa12 PE=1 SV=2;tr|A0A0R4J275|A0A0R4J275_MOUSE NADH dehydrogenase [ubiquinone] 1 alpha subcomplex subunit 12 OS=Mus musculus OX=10090 GN=Nduf	3	1	1	1	0	0	1	0	0	10.6	10.6	9.8821	85	85;149;145	0	12.124	10.6	0	0	5237600	5237600	0	5237600	0
G5E839;P80315	G5E839;P80315	T-complex protein 1 subunit delta	Cct4	tr|G5E839|G5E839_MOUSE T-complex protein 1 subunit delta OS=Mus musculus OX=10090 GN=Cct4 PE=1 SV=1;sp|P80315|TCPD_MOUSE T-complex protein 1 subunit delta OS=Mus musculus OX=10090 GN=Cct4 PE=1 SV=3	2	2	2	2	0	0	2	0	0	5.7	5.7	54.861	509	509;539	0	12.082	5.7	0	0	19260000	19260000	0	19260000	0
F8WHL2;Q8CIE6	F8WHL2;Q8CIE6	Coatomer subunit alpha;Coatomer subunit alpha;Xenin;Proxenin	Copa	tr|F8WHL2|F8WHL2_MOUSE Coatomer subunit alpha OS=Mus musculus OX=10090 GN=Copa PE=1 SV=1;sp|Q8CIE6|COPA_MOUSE Coatomer subunit alpha OS=Mus musculus OX=10090 GN=Copa PE=1 SV=2	2	2	2	2	0	0	2	0	0	2.3	2.3	139.41	1233	1233;1224	0	12.025	2.3	0	0	90568000	90568000	0	90568000	0
G5E866;Q99NB9	G5E866;Q99NB9	Splicing factor 3B subunit 1	Sf3b1	tr|G5E866|G5E866_MOUSE Splicing factor 3B subunit 1 OS=Mus musculus OX=10090 GN=Sf3b1 PE=1 SV=1;sp|Q99NB9|SF3B1_MOUSE Splicing factor 3B subunit 1 OS=Mus musculus OX=10090 GN=Sf3b1 PE=1 SV=1	2	2	2	2	0	0	2	0	0	1.6	1.6	145.83	1304	1304;1304	0	12.015	1.6	0	0	9384800	9384800	0	9384800	0
Q8C2Q7;O35737;Q9Z2X1;P70333	Q8C2Q7;O35737;Q9Z2X1;P70333	Heterogeneous nuclear ribonucleoprotein H;Heterogeneous nuclear ribonucleoprotein H, N-terminally processed;Heterogeneous nuclear ribonucleoprotein F;Heterogeneous nuclear ribonucleoprotein F, N-terminally processed;Heterogeneous nuclear ribonucleoprotein H2	Hnrnph1;Hnrnpf;Hnrnph2	tr|Q8C2Q7|Q8C2Q7_MOUSE Heterogeneous nuclear ribonucleoprotein H OS=Mus musculus OX=10090 GN=Hnrnph1 PE=1 SV=1;sp|O35737|HNRH1_MOUSE Heterogeneous nuclear ribonucleoprotein H OS=Mus musculus OX=10090 GN=Hnrnph1 PE=1 SV=3;sp|Q9Z2X1|HNRPF_MOUSE Heterogeneous	4	2	2	2	0	0	2	0	0	5.1	5.1	51.217	472	472;449;415;449	0	12.001	5.1	0	0	7086500	7086500	0	7086500	0
J3QNW0;P13864	J3QNW0;P13864	DNA (cytosine-5)-methyltransferase;DNA (cytosine-5)-methyltransferase 1	Dnmt1	tr|J3QNW0|J3QNW0_MOUSE DNA (cytosine-5)-methyltransferase OS=Mus musculus OX=10090 GN=Dnmt1 PE=1 SV=1;sp|P13864|DNMT1_MOUSE DNA (cytosine-5)-methyltransferase 1 OS=Mus musculus OX=10090 GN=Dnmt1 PE=1 SV=5	2	2	2	1	1	0	1	1	0	1.3	1.3	169.95	1501	1501;1620	0	11.945	0.7	0.6	0	4370600	2642200	1728400	0	8880900
D3Z0M9	D3Z0M9		Ddx23	tr|D3Z0M9|D3Z0M9_MOUSE RNA helicase OS=Mus musculus OX=10090 GN=Ddx23 PE=1 SV=1	1	2	2	2	0	0	2	0	0	3.3	3.3	95.493	819	819	0	11.867	3.3	0	0	9805000	9805000	0	9805000	0
Q9D0R2;A0A2I3BPK8	Q9D0R2;A0A2I3BPK8	Threonine--tRNA ligase, cytoplasmic	Tars	sp|Q9D0R2|SYTC_MOUSE Threonine--tRNA ligase 1, cytoplasmic OS=Mus musculus OX=10090 GN=Tars1 PE=1 SV=2;tr|A0A2I3BPK8|A0A2I3BPK8_MOUSE Threonyl-tRNA synthetase OS=Mus musculus OX=10090 GN=Tars PE=1 SV=1	2	2	2	2	0	0	2	0	0	2.9	2.9	83.355	722	722;119	0	11.866	2.9	0	0	9783500	9783500	0	9783500	0
Q9CQ19	Q9CQ19	Myosin regulatory light polypeptide 9	Myl9	sp|Q9CQ19|MYL9_MOUSE Myosin regulatory light polypeptide 9 OS=Mus musculus OX=10090 GN=Myl9 PE=1 SV=3	1	1	1	1	0	0	1	0	0	11.6	11.6	19.854	172	172	0	11.827	11.6	0	0	4486200	4486200	0	4486200	0
Q8CBM2;A2AL85;Q8BSY0;A2AL71;A2AL77;A2AL83;A2AL79;Q9CR06;A2AL74;A2AL78;A2AL76;A2AL75;Q3TU40;A2AL81	Q8CBM2;A2AL85;Q8BSY0;A2AL71;A2AL77;A2AL83;A2AL79;Q9CR06;A2AL74;A2AL78;A2AL76;A2AL75;Q3TU40;A2AL81	Aspartyl/asparaginyl beta-hydroxylase	Asph	tr|Q8CBM2|Q8CBM2_MOUSE Aspartyl/asparaginyl beta-hydroxylase OS=Mus musculus OX=10090 GN=Asph PE=1 SV=1;tr|A2AL85|A2AL85_MOUSE Aspartyl/asparaginyl beta-hydroxylase OS=Mus musculus OX=10090 GN=Asph PE=1 SV=1;sp|Q8BSY0|ASPH_MOUSE Aspartyl/asparaginyl beta-h	14	2	2	2	0	0	2	0	0	4.7	4.7	75.127	658	658;725;741;73;149;163;197;207;215;245;261;272;294;310	0	11.819	4.7	0	0	8404000	8404000	0	8404000	0
P84089;A0A1W2P7H9;A0A1W2P7T3;G3UW85	P84089;A0A1W2P7H9;A0A1W2P7T3;G3UW85	Enhancer of rudimentary homolog	Erh	sp|P84089|ERH_MOUSE Enhancer of rudimentary homolog OS=Mus musculus OX=10090 GN=Erh PE=1 SV=1;tr|A0A1W2P7H9|A0A1W2P7H9_MOUSE Enhancer of rudimentary homolog OS=Mus musculus OX=10090 GN=Erh PE=1 SV=1;tr|A0A1W2P7T3|A0A1W2P7T3_MOUSE Enhancer of rudimentary ho	4	2	2	2	0	0	2	0	0	17.3	17.3	12.259	104	104;71;89;123	0	11.724	17.3	0	0	5256700	5256700	0	5256700	0
Q8CAQ8;E9QAY6;A0A0U1RP81;E9Q800	Q8CAQ8;E9QAY6;A0A0U1RP81;E9Q800	MICOS complex subunit Mic60	Immt	sp|Q8CAQ8|MIC60_MOUSE MICOS complex subunit Mic60 OS=Mus musculus OX=10090 GN=Immt PE=1 SV=1;tr|E9QAY6|E9QAY6_MOUSE MICOS complex subunit MIC60 OS=Mus musculus OX=10090 GN=Immt PE=1 SV=1;tr|A0A0U1RP81|A0A0U1RP81_MOUSE MICOS complex subunit MIC60 OS=Mus mus	4	2	2	2	0	0	2	0	0	4	4	83.899	757	757;470;488;679	0	11.67	4	0	0	7617500	7617500	0	7617500	0
Q810A7	Q810A7	ATP-dependent RNA helicase DDX42	Ddx42	sp|Q810A7|DDX42_MOUSE ATP-dependent RNA helicase DDX42 OS=Mus musculus OX=10090 GN=Ddx42 PE=1 SV=3	1	2	2	2	0	0	2	0	0	2.4	2.4	101.96	929	929	0	11.631	2.4	0	0	5324500	5324500	0	5324500	0
Q3UJB0	Q3UJB0		Sf3b2	tr|Q3UJB0|Q3UJB0_MOUSE Splicing factor 3b, subunit 2 OS=Mus musculus OX=10090 GN=Sf3b2 PE=1 SV=1	1	2	2	2	0	0	2	0	0	2.5	2.5	98.197	878	878	0	11.614	2.5	0	0	14101000	14101000	0	14101000	0
Q9WUA2;A0A087WPV4	Q9WUA2;A0A087WPV4	Phenylalanine--tRNA ligase beta subunit	Farsb	sp|Q9WUA2|SYFB_MOUSE Phenylalanine--tRNA ligase beta subunit OS=Mus musculus OX=10090 GN=Farsb PE=1 SV=2;tr|A0A087WPV4|A0A087WPV4_MOUSE Phenylalanine--tRNA ligase beta subunit (Fragment) OS=Mus musculus OX=10090 GN=Farsb PE=1 SV=1	2	2	2	2	0	0	2	0	0	5.6	5.6	65.696	589	589;237	0	11.6	5.6	0	0	9928900	9928900	0	9928900	0
Q9WTI7	Q9WTI7	Unconventional myosin-Ic	Myo1c	sp|Q9WTI7|MYO1C_MOUSE Unconventional myosin-Ic OS=Mus musculus OX=10090 GN=Myo1c PE=1 SV=2	1	2	2	2	0	0	2	0	0	1.8	1.8	121.94	1063	1063	0	11.549	1.8	0	0	4669500	4669500	0	4669500	0
Q80XR5;P26369;A0A140LJ08;Q3KQM4	Q80XR5;P26369;A0A140LJ08;Q3KQM4	Splicing factor U2AF 65 kDa subunit	U2af2	tr|Q80XR5|Q80XR5_MOUSE Splicing factor U2AF subunit OS=Mus musculus OX=10090 GN=U2af2 PE=1 SV=1;sp|P26369|U2AF2_MOUSE Splicing factor U2AF 65 kDa subunit OS=Mus musculus OX=10090 GN=U2af2 PE=1 SV=3;tr|A0A140LJ08|A0A140LJ08_MOUSE Splicing factor U2AF 65 kDa	4	2	2	2	0	0	2	0	0	5.5	5.5	53.12	471	471;475;111;307	0	11.468	5.5	0	0	34334000	34334000	0	34334000	0
Q91VR5;A0A1Y7VM48	Q91VR5;A0A1Y7VM48	ATP-dependent RNA helicase DDX1	Ddx1	sp|Q91VR5|DDX1_MOUSE ATP-dependent RNA helicase DDX1 OS=Mus musculus OX=10090 GN=Ddx1 PE=1 SV=1;tr|A0A1Y7VM48|A0A1Y7VM48_MOUSE ATP-dependent RNA helicase DDX1 (Fragment) OS=Mus musculus OX=10090 GN=Ddx1 PE=1 SV=1	2	2	2	2	0	0	2	0	0	3.2	3.2	82.499	740	740;190	0	11.382	3.2	0	0	19621000	19621000	0	19621000	0
O55143	O55143	Sarcoplasmic/endoplasmic reticulum calcium ATPase 2	Atp2a2	sp|O55143|AT2A2_MOUSE Sarcoplasmic/endoplasmic reticulum calcium ATPase 2 OS=Mus musculus OX=10090 GN=Atp2a2 PE=1 SV=2	1	1	1	1	0	0	1	0	0	2	2	114.86	1044	1044	0	11.343	2	0	0	9065000	9065000	0	9065000	0
Q8BVY0	Q8BVY0	Ribosomal L1 domain-containing protein 1	Rsl1d1	sp|Q8BVY0|RL1D1_MOUSE Ribosomal L1 domain-containing protein 1 OS=Mus musculus OX=10090 GN=Rsl1d1 PE=1 SV=1	1	1	1	1	0	0	1	0	0	2.9	2.9	50.421	452	452	0	11.23	2.9	0	0	0	0	0	0	0
Q8R0A0	Q8R0A0	General transcription factor IIF subunit 2	Gtf2f2	sp|Q8R0A0|T2FB_MOUSE General transcription factor IIF subunit 2 OS=Mus musculus OX=10090 GN=Gtf2f2 PE=1 SV=1	1	1	1	1	0	0	1	0	0	4.8	4.8	28.381	249	249	0	10.886	4.8	0	0	18425000	18425000	0	18425000	0
D3Z4A4;Q61171	D3Z4A4;Q61171	Peroxiredoxin-2	Prdx2	tr|D3Z4A4|D3Z4A4_MOUSE Peroxiredoxin-2 (Fragment) OS=Mus musculus OX=10090 GN=Prdx2 PE=1 SV=8;sp|Q61171|PRDX2_MOUSE Peroxiredoxin-2 OS=Mus musculus OX=10090 GN=Prdx2 PE=1 SV=3	2	1	1	1	0	0	1	0	0	13	13	15.977	146	146;198	0	10.746	13	0	0	4481200	4481200	0	4481200	0
Q5SU72;Q5SU71;Q61510	Q5SU72;Q5SU71;Q61510	E3 ubiquitin/ISG15 ligase TRIM25	Trim25	tr|Q5SU72|Q5SU72_MOUSE E3 ubiquitin/ISG15 ligase TRIM25 OS=Mus musculus OX=10090 GN=Trim25 PE=1 SV=1;tr|Q5SU71|Q5SU71_MOUSE E3 ubiquitin/ISG15 ligase TRIM25 OS=Mus musculus OX=10090 GN=Trim25 PE=1 SV=1;sp|Q61510|TRI25_MOUSE E3 ubiquitin/ISG15 ligase TRIM25	3	1	1	1	0	0	1	0	0	3.4	3.4	44.163	387	387;626;634	0	10.665	3.4	0	0	2914000	2914000	0	2914000	0
Q9D8S5;O35326	Q9D8S5;O35326	Serine/arginine-rich splicing factor 5	Srsf5	tr|Q9D8S5|Q9D8S5_MOUSE Serine/arginine-rich-splicing factor 5 OS=Mus musculus OX=10090 GN=Srsf5 PE=1 SV=1;sp|O35326|SRSF5_MOUSE Serine/arginine-rich splicing factor 5 OS=Mus musculus OX=10090 GN=Srsf5 PE=1 SV=2	2	2	1	2	0	0	1	0	0	12.2	8.9	30.978	270	270;269	0	10.62	12.2	0	0	6967400	6967400	0	6967400	0
Q9D7S7	Q9D7S7	60S ribosomal protein L22-like 1	Rpl22l1	sp|Q9D7S7|RL22L_MOUSE 60S ribosomal protein L22-like 1 OS=Mus musculus OX=10090 GN=Rpl22l1 PE=1 SV=1	1	1	1	1	0	0	1	0	0	9.8	9.8	14.467	122	122	0	10.025	9.8	0	0	3349400	3349400	0	3349400	0
A0A494BAF9;Q8BI79	A0A494BAF9;Q8BI79	Coiled-coil domain-containing protein 40	Ccdc40	tr|A0A494BAF9|A0A494BAF9_MOUSE Coiled-coil domain-containing protein 40 OS=Mus musculus OX=10090 GN=Ccdc40 PE=1 SV=1;sp|Q8BI79|CCD40_MOUSE Coiled-coil domain-containing protein 40 OS=Mus musculus OX=10090 GN=Ccdc40 PE=1 SV=1	2	1	1	1	1	1	1	1	1	1.2	1.2	144.24	1262	1262;1192	0	9.9997	1.2	1.2	1.2	4932300000	3818500000	981030000	0	0
A0A494BAD3;P97742	A0A494BAD3;P97742	Carnitine O-palmitoyltransferase 1, liver isoform	Cpt1a	tr|A0A494BAD3|A0A494BAD3_MOUSE Carnitine O-palmitoyltransferase (Fragment) OS=Mus musculus OX=10090 GN=Cpt1a PE=1 SV=1;sp|P97742|CPT1A_MOUSE Carnitine O-palmitoyltransferase 1, liver isoform OS=Mus musculus OX=10090 GN=Cpt1a PE=1 SV=4	2	1	1	1	0	0	1	0	0	2.7	2.7	46.147	401	401;773	0	9.8701	2.7	0	0	6489500	6489500	0	6489500	0
A2AKJ2;A0A0A6YWC8;P20152	A2AKJ2;A0A0A6YWC8;P20152	Vimentin	Vim	tr|A2AKJ2|A2AKJ2_MOUSE Vimentin (Fragment) OS=Mus musculus OX=10090 GN=Vim PE=1 SV=2;tr|A0A0A6YWC8|A0A0A6YWC8_MOUSE Vimentin OS=Mus musculus OX=10090 GN=Vim PE=1 SV=1;sp|P20152|VIME_MOUSE Vimentin OS=Mus musculus OX=10090 GN=Vim PE=1 SV=3	3	1	1	0	0	1	0	0	1	14.2	14.2	14.85	134	134;427;466	0	9.8259	0	0	14.2	11602000	0	0	0	0
Q05D44	Q05D44	Eukaryotic translation initiation factor 5B	Eif5b	sp|Q05D44|IF2P_MOUSE Eukaryotic translation initiation factor 5B OS=Mus musculus OX=10090 GN=Eif5b PE=1 SV=2	1	1	1	1	0	0	1	0	0	0.9	0.9	137.61	1216	1216	0	9.7856	0.9	0	0	13304000	13304000	0	13304000	0
S4R1W1;A0A1D5RLD8;A0A0A0MQF6;P16858	S4R1W1;A0A1D5RLD8;A0A0A0MQF6;P16858	Glyceraldehyde-3-phosphate dehydrogenase	Gm3839;Gapdh	tr|S4R1W1|S4R1W1_MOUSE Glyceraldehyde-3-phosphate dehydrogenase OS=Mus musculus OX=10090 GN=Gm3839 PE=1 SV=1;tr|A0A1D5RLD8|A0A1D5RLD8_MOUSE Glyceraldehyde-3-phosphate dehydrogenase OS=Mus musculus OX=10090 GN=Gm10358 PE=1 SV=1;tr|A0A0A0MQF6|A0A0A0MQF6_MOUS	4	1	1	1	0	0	1	0	0	3.6	3.6	35.812	333	333;333;359;333	0	9.6945	3.6	0	0	9232100	9232100	0	9232100	0
Q6ZWQ9;Q3THE2	Q6ZWQ9;Q3THE2	Myosin regulatory light chain 12B	Myl12a;Myl12b	tr|Q6ZWQ9|Q6ZWQ9_MOUSE Myosin, light chain 12A, regulatory, non-sarcomeric OS=Mus musculus OX=10090 GN=Myl12a PE=1 SV=1;sp|Q3THE2|ML12B_MOUSE Myosin regulatory light chain 12B OS=Mus musculus OX=10090 GN=Myl12b PE=1 SV=2	2	1	1	1	0	0	1	0	0	11.6	11.6	19.895	172	172;172	0	9.6142	11.6	0	0	25552000	25552000	0	25552000	0
Q9D0I9	Q9D0I9	Arginine--tRNA ligase, cytoplasmic	Rars	sp|Q9D0I9|SYRC_MOUSE Arginine--tRNA ligase, cytoplasmic OS=Mus musculus OX=10090 GN=Rars1 PE=1 SV=2	1	1	1	1	0	0	1	0	0	1.8	1.8	75.673	660	660	0	9.4906	1.8	0	0	17694000	17694000	0	17694000	0
E9PV22;Q505F5	E9PV22;Q505F5	Leucine-rich repeat-containing protein 47	Lrrc47	tr|E9PV22|E9PV22_MOUSE Leucine-rich repeat-containing protein 47 OS=Mus musculus OX=10090 GN=Lrrc47 PE=1 SV=1;sp|Q505F5|LRC47_MOUSE Leucine-rich repeat-containing protein 47 OS=Mus musculus OX=10090 GN=Lrrc47 PE=1 SV=1	2	1	1	1	0	0	1	0	0	2	2	65.903	603	603;581	0	9.4701	2	0	0	10879000	10879000	0	10879000	0
P62751	P62751	60S ribosomal protein L23a	Rpl23a	sp|P62751|RL23A_MOUSE 60S ribosomal protein L23a OS=Mus musculus OX=10090 GN=Rpl23a PE=1 SV=1	1	1	1	1	0	0	1	0	0	7.7	7.7	17.695	156	156	0	9.0575	7.7	0	0	12908000	12908000	0	12908000	0
P12970	P12970	60S ribosomal protein L7a	Rpl7a	sp|P12970|RL7A_MOUSE 60S ribosomal protein L7a OS=Mus musculus OX=10090 GN=Rpl7a PE=1 SV=2	1	1	1	1	0	0	1	0	0	3.4	3.4	29.976	266	266	0	8.8352	3.4	0	0	6430900	6430900	0	6430900	0
Q3TWV4;P84091	Q3TWV4;P84091	AP-2 complex subunit mu	Ap2m1	tr|Q3TWV4|Q3TWV4_MOUSE AP-2 complex subunit mu OS=Mus musculus OX=10090 GN=Ap2m1 PE=1 SV=1;sp|P84091|AP2M1_MOUSE AP-2 complex subunit mu OS=Mus musculus OX=10090 GN=Ap2m1 PE=1 SV=1	2	1	1	1	0	0	1	0	0	1.6	1.6	49.389	433	433;435	0	8.7986	1.6	0	0	10557000	10557000	0	10557000	0
A2A9P6;P24788	A2A9P6;P24788	Cyclin-dependent kinase 11B	Cdk11b	tr|A2A9P6|A2A9P6_MOUSE Cyclin-dependent kinase 11B OS=Mus musculus OX=10090 GN=Cdk11b PE=1 SV=1;sp|P24788|CD11B_MOUSE Cyclin-dependent kinase 11B OS=Mus musculus OX=10090 GN=Cdk11b PE=1 SV=2	2	1	1	1	0	0	1	0	0	1.5	1.5	87.319	750	750;784	0	8.7447	1.5	0	0	11806000	11806000	0	11806000	0
Q5SUF2	Q5SUF2	Luc7-like protein 3	Luc7l3	sp|Q5SUF2|LC7L3_MOUSE Luc7-like protein 3 OS=Mus musculus OX=10090 GN=Luc7l3 PE=1 SV=1	1	1	1	1	0	0	1	0	0	2.5	2.5	51.45	432	432	0	8.7197	2.5	0	0	4287300	4287300	0	4287300	0
Q921F4	Q921F4	Heterogeneous nuclear ribonucleoprotein L-like	Hnrnpll	sp|Q921F4|HNRLL_MOUSE Heterogeneous nuclear ribonucleoprotein L-like OS=Mus musculus OX=10090 GN=Hnrnpll PE=1 SV=3	1	1	1	1	0	0	1	0	0	3	3	64.124	591	591	0	8.6986	3	0	0	4471200	4471200	0	4471200	0
Q9CQH7	Q9CQH7	Transcription factor BTF3 homolog 4	Btf3l4	sp|Q9CQH7|BT3L4_MOUSE Transcription factor BTF3 homolog 4 OS=Mus musculus OX=10090 GN=Btf3l4 PE=1 SV=1	1	1	1	1	0	0	1	0	0	19	19	17.27	158	158	0	8.6118	19	0	0	11043000	11043000	0	11043000	0
A0A1L1SQA8;P62852	A0A1L1SQA8;P62852	40S ribosomal protein S25	Rps25	tr|A0A1L1SQA8|A0A1L1SQA8_MOUSE 40S ribosomal protein S25 OS=Mus musculus OX=10090 GN=Rps25 PE=1 SV=1;sp|P62852|RS25_MOUSE 40S ribosomal protein S25 OS=Mus musculus OX=10090 GN=Rps25 PE=1 SV=1	2	1	1	1	0	0	1	0	0	10.8	10.8	10.309	93	93;125	0	8.6031	10.8	0	0	20197000	20197000	0	20197000	0
A0A3B2WDD2;A0A3B2WBL1;Q5XJF6;P53026	A0A3B2WDD2;A0A3B2WBL1;Q5XJF6;P53026	Ribosomal protein;60S ribosomal protein L10a	Rpl10a	tr|A0A3B2WDD2|A0A3B2WDD2_MOUSE Ribosomal protein OS=Mus musculus OX=10090 GN=Rpl10a PE=1 SV=1;tr|A0A3B2WBL1|A0A3B2WBL1_MOUSE Ribosomal protein OS=Mus musculus OX=10090 GN=Rpl10a PE=1 SV=1;tr|Q5XJF6|Q5XJF6_MOUSE Ribosomal protein OS=Mus musculus OX=10090 GN	4	1	1	1	0	0	1	0	0	6.8	6.8	21.636	190	190;216;217;217	0	8.5454	6.8	0	0	3546000	3546000	0	3546000	0
Q922Q4	Q922Q4	Pyrroline-5-carboxylate reductase 2	Pycr2	sp|Q922Q4|P5CR2_MOUSE Pyrroline-5-carboxylate reductase 2 OS=Mus musculus OX=10090 GN=Pycr2 PE=1 SV=1	1	1	1	0	1	0	0	1	0	5.3	5.3	33.659	320	320	0	8.3278	0	5.3	0	998610000	0	998610000	0	5130900000
A2AW41;F7B5B5;Q8VHM5	A2AW41;F7B5B5;Q8VHM5		Hnrnpr	tr|A2AW41|A2AW41_MOUSE Heterogeneous nuclear ribonucleoprotein R (Fragment) OS=Mus musculus OX=10090 GN=Hnrnpr PE=1 SV=1;tr|F7B5B5|F7B5B5_MOUSE Heterogeneous nuclear ribonucleoprotein R OS=Mus musculus OX=10090 GN=Hnrnpr PE=1 SV=1;tr|Q8VHM5|Q8VHM5_MOUSE He	3	1	1	1	0	0	1	0	0	4.8	4.8	30.064	270	270;531;632	0	8.2717	4.8	0	0	32372000	32372000	0	32372000	0
H3BLP7;A0A286YDM3;H3BK96;H3BKD0;H3BLL4;B2M1R6;P61979	H3BLP7;A0A286YDM3;H3BK96;H3BKD0;H3BLL4;B2M1R6;P61979	Heterogeneous nuclear ribonucleoprotein K	Hnrnpk	tr|H3BLP7|H3BLP7_MOUSE Heterogeneous nuclear ribonucleoprotein K (Fragment) OS=Mus musculus OX=10090 GN=Hnrnpk PE=1 SV=1;tr|A0A286YDM3|A0A286YDM3_MOUSE Heterogeneous nuclear ribonucleoprotein K (Fragment) OS=Mus musculus OX=10090 GN=Hnrnpk PE=1 SV=1;tr|H3B	7	1	1	1	0	0	1	0	0	5.7	5.7	23.254	210	210;230;256;299;394;440;463	0	8.1163	5.7	0	0	12943000	12943000	0	12943000	0
A0A0A0MQD2;B2RUF0;P62960;Q9Z2C8;Q9JKB3	A0A0A0MQD2;B2RUF0;P62960;Q9Z2C8;Q9JKB3	Nuclease-sensitive element-binding protein 1;Y-box-binding protein 2;Y-box-binding protein 3	Ybx2;Ybx1;Ybx3	tr|A0A0A0MQD2|A0A0A0MQD2_MOUSE Y-box-binding protein 2 OS=Mus musculus OX=10090 GN=Ybx2 PE=1 SV=1;tr|B2RUF0|B2RUF0_MOUSE Y box protein 2 OS=Mus musculus OX=10090 GN=Ybx2 PE=1 SV=1;sp|P62960|YBOX1_MOUSE Y-box-binding protein 1 OS=Mus musculus OX=10090 GN=Yb	5	1	1	1	0	0	1	0	0	6	6	31.438	282	282;359;322;360;361	0	8.0751	6	0	0	0	0	0	0	0
A0A0A6YVS2;Q921L3	A0A0A6YVS2;Q921L3	Transmembrane and coiled-coil domain-containing protein 1	Tmco1	tr|A0A0A6YVS2|A0A0A6YVS2_MOUSE Calcium load-activated calcium channel (Fragment) OS=Mus musculus OX=10090 GN=Tmco1 PE=1 SV=1;sp|Q921L3|TMCO1_MOUSE Calcium load-activated calcium channel OS=Mus musculus OX=10090 GN=Tmco1 PE=1 SV=1	2	1	1	1	0	0	1	0	0	5.5	5.5	22.283	200	200;188	0	7.9479	5.5	0	0	6199300	6199300	0	6199300	0
Q9CR41	Q9CR41	Huntingtin-interacting protein K	Hypk	sp|Q9CR41|HYPK_MOUSE Huntingtin-interacting protein K OS=Mus musculus OX=10090 GN=Hypk PE=1 SV=3	1	1	1	1	0	0	1	0	0	20.7	20.7	13.651	121	121	0	7.8984	20.7	0	0	5021600	5021600	0	5021600	0
Q9D6S7	Q9D6S7	Ribosome-recycling factor, mitochondrial	Mrrf	sp|Q9D6S7|RRFM_MOUSE Ribosome-recycling factor, mitochondrial OS=Mus musculus OX=10090 GN=Mrrf PE=1 SV=1	1	1	1	1	0	0	1	0	0	6.5	6.5	29.05	262	262	0	7.8913	6.5	0	0	4497300	4497300	0	4497300	0
Q9CR57	Q9CR57	60S ribosomal protein L14	Rpl14	sp|Q9CR57|RL14_MOUSE 60S ribosomal protein L14 OS=Mus musculus OX=10090 GN=Rpl14 PE=1 SV=3	1	1	1	1	0	0	1	0	0	6	6	23.564	217	217	0	7.852	6	0	0	8739400	8739400	0	8739400	0
Q9DBY8	Q9DBY8	Nuclear valosin-containing protein-like	Nvl	sp|Q9DBY8|NVL_MOUSE Nuclear valosin-containing protein-like OS=Mus musculus OX=10090 GN=Nvl PE=1 SV=1	1	1	1	1	0	0	1	0	0	2	2	94.475	855	855	0	7.8345	2	0	0	4653700	4653700	0	4653700	0
Q6A058	Q6A058	Armadillo repeat-containing X-linked protein 2	Armcx2	sp|Q6A058|ARMX2_MOUSE Armadillo repeat-containing X-linked protein 2 OS=Mus musculus OX=10090 GN=Armcx2 PE=2 SV=2	1	1	1	1	0	0	1	0	0	1.8	1.8	81.035	784	784	0	7.7633	1.8	0	0	5372200	5372200	0	5372200	0
Q9QXX4	Q9QXX4	Calcium-binding mitochondrial carrier protein Aralar2	Slc25a13	sp|Q9QXX4|CMC2_MOUSE Calcium-binding mitochondrial carrier protein Aralar2 OS=Mus musculus OX=10090 GN=Slc25a13 PE=1 SV=1	1	1	1	1	0	0	1	0	0	3.3	3.3	74.466	676	676	0	7.7231	3.3	0	0	42361000	42361000	0	42361000	0
Q5SWD9	Q5SWD9	Pre-rRNA-processing protein TSR1 homolog	Tsr1	sp|Q5SWD9|TSR1_MOUSE Pre-rRNA-processing protein TSR1 homolog OS=Mus musculus OX=10090 GN=Tsr1 PE=1 SV=1	1	1	1	1	0	0	1	0	0	2.9	2.9	92.104	803	803	0	7.6895	2.9	0	0	9279500	9279500	0	9279500	0
Q8BMJ2	Q8BMJ2	Leucine--tRNA ligase, cytoplasmic	Lars	sp|Q8BMJ2|SYLC_MOUSE Leucine--tRNA ligase, cytoplasmic OS=Mus musculus OX=10090 GN=Lars1 PE=1 SV=2	1	1	1	1	0	0	1	0	0	0.8	0.8	134.19	1178	1178	0	7.637	0.8	0	0	1702600	1702600	0	1702600	0
Q5SUD5;Q5SUC9	Q5SUD5;Q5SUC9	Protein SCO1 homolog, mitochondrial	Sco1	tr|Q5SUD5|Q5SUD5_MOUSE Protein SCO1 homolog, mitochondrial OS=Mus musculus OX=10090 GN=Sco1 PE=1 SV=1;sp|Q5SUC9|SCO1_MOUSE Protein SCO1 homolog, mitochondrial OS=Mus musculus OX=10090 GN=Sco1 PE=1 SV=1	2	1	1	1	0	0	1	0	0	5.5	5.5	32.118	289	289;284	0	7.5951	5.5	0	0	1835500	1835500	0	1835500	0
Q9Z2D6	Q9Z2D6	Methyl-CpG-binding protein 2	Mecp2	sp|Q9Z2D6|MECP2_MOUSE Methyl-CpG-binding protein 2 OS=Mus musculus OX=10090 GN=Mecp2 PE=1 SV=1	1	1	1	1	0	0	1	0	0	2.9	2.9	52.307	484	484	0	7.5904	2.9	0	0	4894800	4894800	0	4894800	0
Q3TIV5	Q3TIV5	Zinc finger CCCH domain-containing protein 15	Zc3h15	sp|Q3TIV5|ZC3HF_MOUSE Zinc finger CCCH domain-containing protein 15 OS=Mus musculus OX=10090 GN=Zc3h15 PE=1 SV=2	1	1	1	1	0	0	1	0	0	3.3	3.3	48.327	426	426	0	7.5707	3.3	0	0	10597000	10597000	0	10597000	0
A2AFW6;Q9D050;Q791V5	A2AFW6;Q9D050;Q791V5	Mitochondrial carrier homolog 2	Mtch2	tr|A2AFW6|A2AFW6_MOUSE Mitochondrial carrier homolog 2 OS=Mus musculus OX=10090 GN=Mtch2 PE=1 SV=1;tr|Q9D050|Q9D050_MOUSE Mitochondrial carrier homolog 2 OS=Mus musculus OX=10090 GN=Mtch2 PE=1 SV=1;sp|Q791V5|MTCH2_MOUSE Mitochondrial carrier homolog 2 OS=M	3	1	1	1	0	0	1	0	0	3.1	3.1	32.345	294	294;312;303	0	7.5673	3.1	0	0	2364600	2364600	0	2364600	0
F6RB63;A2BI12;Q99JF8	F6RB63;A2BI12;Q99JF8	PC4 and SFRS1-interacting protein	Psip1	tr|F6RB63|F6RB63_MOUSE PC4 and SFRS1-interacting protein (Fragment) OS=Mus musculus OX=10090 GN=Psip1 PE=1 SV=1;tr|A2BI12|A2BI12_MOUSE PC4 and SFRS1-interacting protein OS=Mus musculus OX=10090 GN=Psip1 PE=1 SV=1;sp|Q99JF8|PSIP1_MOUSE PC4 and SFRS1-interac	3	1	1	1	0	0	1	0	0	18.9	18.9	10.353	90	90;327;528	0	7.5584	18.9	0	0	18798000	18798000	0	18798000	0
Q9DCH4	Q9DCH4	Eukaryotic translation initiation factor 3 subunit F	Eif3f	sp|Q9DCH4|EIF3F_MOUSE Eukaryotic translation initiation factor 3 subunit F OS=Mus musculus OX=10090 GN=Eif3f PE=1 SV=2	1	1	1	1	0	0	1	0	0	4.2	4.2	37.984	361	361	0	7.546	4.2	0	0	9842700	9842700	0	9842700	0
D3YYN7;A0A0G2JGX4;Q8VCE0;Q6PIC6;Q6PIE5;Q8VDN2	D3YYN7;A0A0G2JGX4;Q8VCE0;Q6PIC6;Q6PIE5;Q8VDN2	Sodium/potassium-transporting ATPase subunit alpha-3;Sodium/potassium-transporting ATPase subunit alpha-2;Sodium/potassium-transporting ATPase subunit alpha-1	Atp1a2;Atp1a3;Atp1a1	tr|D3YYN7|D3YYN7_MOUSE Sodium/potassium-transporting ATPase subunit alpha OS=Mus musculus OX=10090 GN=Atp1a2 PE=1 SV=1;tr|A0A0G2JGX4|A0A0G2JGX4_MOUSE Sodium/potassium-transporting ATPase subunit alpha OS=Mus musculus OX=10090 GN=Atp1a3 PE=1 SV=1;tr|Q8VCE0|	6	1	1	1	0	0	1	0	0	1.9	1.9	103.58	947	947;1026;1053;1013;1020;1023	0	7.4877	1.9	0	0	3482400	3482400	0	3482400	0
Q9D0D5	Q9D0D5	General transcription factor IIE subunit 1	Gtf2e1	sp|Q9D0D5|T2EA_MOUSE General transcription factor IIE subunit 1 OS=Mus musculus OX=10090 GN=Gtf2e1 PE=1 SV=1	1	1	1	1	0	0	1	0	0	3.4	3.4	49.593	440	440	0	7.3868	3.4	0	0	29840000	29840000	0	29840000	0
A0A0A6YW67;E9Q9J0;E9Q4P0;E9Q5F6;E9QNP0;Q5SX22;P62984;P62983;P0CG49;P0CG50	A0A0A6YW67;E9Q9J0;E9Q4P0;E9Q5F6;E9QNP0;Q5SX22;P62984;P62983;P0CG49;P0CG50	Ubiquitin-60S ribosomal protein L40;Ubiquitin;60S ribosomal protein L40;Ubiquitin-40S ribosomal protein S27a;Ubiquitin;40S ribosomal protein S27a;Polyubiquitin-B;Ubiquitin;Polyubiquitin-C;Ubiquitin;Ubiquitin-related 1;Ubiquitin-related 2	Gm8797;Uba52;Kxd1;Ubc;Ubb;Rps27a	tr|A0A0A6YW67|A0A0A6YW67_MOUSE Predicted pseudogene 8797 OS=Mus musculus OX=10090 GN=Gm8797 PE=4 SV=1;tr|E9Q9J0|E9Q9J0_MOUSE Ubiquitin-60S ribosomal protein L40 (Fragment) OS=Mus musculus OX=10090 GN=Uba52 PE=3 SV=1;tr|E9Q4P0|E9Q4P0_MOUSE KxDL motif-contai	10	1	1	1	0	0	1	0	0	20.8	20.8	8.7279	77	77;96;193;201;232;236;128;156;305;734	0	7.3114	20.8	0	0	8306100	8306100	0	8306100	0
D6RGA5;Q9D287	D6RGA5;Q9D287	Pre-mRNA-splicing factor SPF27	Bcas2	tr|D6RGA5|D6RGA5_MOUSE Pre-mRNA-splicing factor SPF27 OS=Mus musculus OX=10090 GN=Bcas2 PE=1 SV=1;sp|Q9D287|SPF27_MOUSE Pre-mRNA-splicing factor SPF27 OS=Mus musculus OX=10090 GN=Bcas2 PE=1 SV=1	2	1	1	1	0	0	1	0	0	16.7	16.7	8.6486	78	78;225	0	7.2992	16.7	0	0	2780100	2780100	0	2780100	0
Q8BP67	Q8BP67	60S ribosomal protein L24	Rpl24	sp|Q8BP67|RL24_MOUSE 60S ribosomal protein L24 OS=Mus musculus OX=10090 GN=Rpl24 PE=1 SV=2	1	1	1	1	0	0	1	0	0	8.3	8.3	17.779	157	157	0	7.268	8.3	0	0	27740000	27740000	0	27740000	0
A0A494BAS3;A0A494BAU3;A0A494BAM8;A0A494B908;A0A494BAW2;P46425;P19157	A0A494BAS3;A0A494BAU3;A0A494BAM8;A0A494B908;A0A494BAW2;P46425;P19157	Glutathione S-transferase P 2;Glutathione S-transferase P 1	Gstp2;Gstp1	tr|A0A494BAS3|A0A494BAS3_MOUSE Glutathione S-transferase P 2 (Fragment) OS=Mus musculus OX=10090 GN=Gstp2 PE=1 SV=1;tr|A0A494BAU3|A0A494BAU3_MOUSE Glutathione transferase (Fragment) OS=Mus musculus OX=10090 GN=Gstp2 PE=1 SV=1;tr|A0A494BAM8|A0A494BAM8_MOUSE	7	1	1	1	0	0	1	0	0	19	19	9.5698	84	84;95;132;160;193;210;210	0	7.2045	19	0	0	22801000	22801000	0	22801000	0
E9PYG9;F6TVP2;Q60710	E9PYG9;F6TVP2;Q60710	Deoxynucleoside triphosphate triphosphohydrolase SAMHD1	Samhd1	tr|E9PYG9|E9PYG9_MOUSE Deoxynucleoside triphosphate triphosphohydrolase SAMHD1 OS=Mus musculus OX=10090 GN=Samhd1 PE=1 SV=1;tr|F6TVP2|F6TVP2_MOUSE Deoxynucleoside triphosphate triphosphohydrolase SAMHD1 (Fragment) OS=Mus musculus OX=10090 GN=Samhd1 PE=1 SV	3	1	1	1	0	0	1	0	0	4.3	4.3	67.245	582	582;631;658	0	7.1856	4.3	0	0	22329000	22329000	0	22329000	0
B1ARW4;Q99LY9	B1ARW4;Q99LY9	NADH dehydrogenase [ubiquinone] iron-sulfur protein 5;NADH dehydrogenase [ubiquinone] iron-sulfur protein 5, N-terminally processed	Ndufs5	tr|B1ARW4|B1ARW4_MOUSE NADH dehydrogenase [ubiquinone] iron-sulfur protein 5 (Fragment) OS=Mus musculus OX=10090 GN=Ndufs5 PE=1 SV=1;sp|Q99LY9|NDUS5_MOUSE NADH dehydrogenase [ubiquinone] iron-sulfur protein 5 OS=Mus musculus OX=10090 GN=Ndufs5 PE=1 SV=3	2	1	1	1	0	0	1	0	0	13.2	13.2	10.909	91	91;106	0	7.1838	13.2	0	0	6977700	6977700	0	6977700	0
Q9DCR2	Q9DCR2	AP-3 complex subunit sigma-1	Ap3s1	sp|Q9DCR2|AP3S1_MOUSE AP-3 complex subunit sigma-1 OS=Mus musculus OX=10090 GN=Ap3s1 PE=1 SV=2	1	1	1	1	0	0	1	0	0	5.7	5.7	21.732	193	193	0	7.1634	5.7	0	0	660300	660300	0	660300	0
P62309	P62309	Small nuclear ribonucleoprotein G	Snrpg	sp|P62309|RUXG_MOUSE Small nuclear ribonucleoprotein G OS=Mus musculus OX=10090 GN=Snrpg PE=1 SV=1	1	1	1	1	0	0	1	0	0	17.1	17.1	8.496	76	76	0	7.1343	17.1	0	0	23322000	23322000	0	23322000	0
Z4YJW0;Q8C7X2	Z4YJW0;Q8C7X2	ER membrane protein complex subunit 1	Emc1	tr|Z4YJW0|Z4YJW0_MOUSE ER membrane protein complex subunit 1 OS=Mus musculus OX=10090 GN=Emc1 PE=1 SV=1;sp|Q8C7X2|EMC1_MOUSE ER membrane protein complex subunit 1 OS=Mus musculus OX=10090 GN=Emc1 PE=1 SV=1	2	1	1	1	0	0	1	0	0	1.6	1.6	111.56	997	997;997	0	7.1142	1.6	0	0	6259500	6259500	0	6259500	0
F7BAC9;E9Q6A9;Q02248	F7BAC9;E9Q6A9;Q02248	Catenin beta-1	Ctnnb1	tr|F7BAC9|F7BAC9_MOUSE Catenin beta-1 (Fragment) OS=Mus musculus OX=10090 GN=Ctnnb1 PE=1 SV=1;tr|E9Q6A9|E9Q6A9_MOUSE Catenin beta-1 OS=Mus musculus OX=10090 GN=Ctnnb1 PE=1 SV=1;sp|Q02248|CTNB1_MOUSE Catenin beta-1 OS=Mus musculus OX=10090 GN=Ctnnb1 PE=1 SV	3	1	1	1	0	0	1	0	0	5.9	5.9	18.667	169	169;607;781	0	7.0799	5.9	0	0	1973400	1973400	0	1973400	0
H3BJ30;H3BJW3;Q6NVF9	H3BJ30;H3BJW3;Q6NVF9	Cleavage and polyadenylation specificity factor subunit 6	Cpsf6	tr|H3BJ30|H3BJ30_MOUSE Cleavage and polyadenylation specificity factor subunit 6 OS=Mus musculus OX=10090 GN=Cpsf6 PE=1 SV=1;tr|H3BJW3|H3BJW3_MOUSE Cleavage and polyadenylation specificity factor subunit 6 OS=Mus musculus OX=10090 GN=Cpsf6 PE=1 SV=1;sp|Q6N	3	1	1	1	0	0	1	0	0	2.5	2.5	59.308	552	552;588;551	0	7.0381	2.5	0	0	26722000	26722000	0	26722000	0
Q3UMB9	Q3UMB9	WASH complex subunit 7	Kiaa1033	sp|Q3UMB9|WASC4_MOUSE WASH complex subunit 4 OS=Mus musculus OX=10090 GN=Washc4 PE=1 SV=2	1	1	1	1	0	0	1	0	0	0.9	0.9	136.37	1173	1173	0	7.0082	0.9	0	0	3800400	3800400	0	3800400	0
F6Q3W0;P61965	F6Q3W0;P61965	WD repeat-containing protein 5	Wdr5	tr|F6Q3W0|F6Q3W0_MOUSE WD repeat-containing protein 5 (Fragment) OS=Mus musculus OX=10090 GN=Wdr5 PE=1 SV=1;sp|P61965|WDR5_MOUSE WD repeat-containing protein 5 OS=Mus musculus OX=10090 GN=Wdr5 PE=1 SV=1	2	1	1	1	0	0	1	0	0	5.3	5.3	31.014	281	281;334	0	6.9566	5.3	0	0	2760600	2760600	0	2760600	0
Q61550	Q61550	Double-strand-break repair protein rad21 homolog	Rad21	sp|Q61550|RAD21_MOUSE Double-strand-break repair protein rad21 homolog OS=Mus musculus OX=10090 GN=Rad21 PE=1 SV=3	1	1	1	1	0	0	1	0	0	2	2	72.082	635	635	0	6.9369	2	0	0	3950400	3950400	0	3950400	0
Q9QZQ8	Q9QZQ8	Core histone macro-H2A.1	H2afy	sp|Q9QZQ8|H2AY_MOUSE Core histone macro-H2A.1 OS=Mus musculus OX=10090 GN=Macroh2a1 PE=1 SV=3	1	1	1	1	0	0	1	0	0	2.7	2.7	39.735	372	372	0	6.9253	2.7	0	0	3378900	3378900	0	3378900	0
Q8BTI8	Q8BTI8	Serine/arginine repetitive matrix protein 2	Srrm2	sp|Q8BTI8|SRRM2_MOUSE Serine/arginine repetitive matrix protein 2 OS=Mus musculus OX=10090 GN=Srrm2 PE=1 SV=3	1	1	1	1	0	0	1	0	0	0.5	0.5	294.84	2703	2703	0	6.9059	0.5	0	0	9334800	9334800	0	9334800	0
Q3UEB3	Q3UEB3	Poly(U)-binding-splicing factor PUF60	Puf60	sp|Q3UEB3|PUF60_MOUSE Poly(U)-binding-splicing factor PUF60 OS=Mus musculus OX=10090 GN=Puf60 PE=1 SV=2	1	1	1	1	0	0	1	0	0	2.8	2.8	60.248	564	564	0	6.8739	2.8	0	0	7185700	7185700	0	7185700	0
D6RI83;D3Z0S6;Q62189	D6RI83;D3Z0S6;Q62189	U1 small nuclear ribonucleoprotein A	Snrpa	tr|D6RI83|D6RI83_MOUSE U1 small nuclear ribonucleoprotein A OS=Mus musculus OX=10090 GN=Snrpa PE=1 SV=1;tr|D3Z0S6|D3Z0S6_MOUSE U1 small nuclear ribonucleoprotein A (Fragment) OS=Mus musculus OX=10090 GN=Snrpa PE=1 SV=1;sp|Q62189|SNRPA_MOUSE U1 small nuclea	3	1	1	1	0	0	1	0	0	27.3	27.3	4.9937	44	44;247;287	0	6.872	27.3	0	0	18744000	18744000	0	9395400	0
Q9D0J8	Q9D0J8	Parathymosin	Ptms	sp|Q9D0J8|PTMS_MOUSE Parathymosin OS=Mus musculus OX=10090 GN=Ptms PE=1 SV=3	1	1	1	1	0	0	1	0	0	10.9	10.9	11.43	101	101	0	6.8318	10.9	0	0	6413900	6413900	0	6413900	0
A2AFI4;A2AFI3;A0A2I3BRL8;Q91VM5;Q9WV02	A2AFI4;A2AFI3;A0A2I3BRL8;Q91VM5;Q9WV02	RNA binding motif protein, X-linked-like-1;RNA-binding motif protein, X chromosome;RNA-binding motif protein, X chromosome, N-terminally processed	Rbmx;Rbmxl1	tr|A2AFI4|A2AFI4_MOUSE RNA-binding motif protein, X chromosome (Fragment) OS=Mus musculus OX=10090 GN=Rbmx PE=1 SV=1;tr|A2AFI3|A2AFI3_MOUSE RNA-binding motif protein, X chromosome OS=Mus musculus OX=10090 GN=Rbmx PE=1 SV=1;tr|A0A2I3BRL8|A0A2I3BRL8_MOUSE Pr	5	1	1	1	0	0	1	0	0	17.5	17.5	11.298	103	103;301;388;388;391	0	6.7999	17.5	0	0	5375200	5375200	0	5375200	0
A0A087WRI1;Q8CFQ1;Q99K94;Q8C3V4;A0A087WSP5;P42225	A0A087WRI1;Q8CFQ1;Q99K94;Q8C3V4;A0A087WSP5;P42225	Signal transducer and activator of transcription;Signal transducer and activator of transcription 1	Stat1	tr|A0A087WRI1|A0A087WRI1_MOUSE Signal transducer and activator of transcription 1 (Fragment) OS=Mus musculus OX=10090 GN=Stat1 PE=1 SV=1;tr|Q8CFQ1|Q8CFQ1_MOUSE Signal transducer and activator of transcription 1 (Fragment) OS=Mus musculus OX=10090 GN=Stat1	6	1	1	1	0	0	1	0	0	9.2	9.2	15.068	131	131;243;712;749;755;749	0	6.7956	9.2	0	0	11333000	11333000	0	11333000	0
Q5SV64;Q3UH59;Q61879	Q5SV64;Q3UH59;Q61879	Myosin-10	Myh10	tr|Q5SV64|Q5SV64_MOUSE Myosin-10 OS=Mus musculus OX=10090 GN=Myh10 PE=1 SV=1;tr|Q3UH59|Q3UH59_MOUSE Myosin-10 OS=Mus musculus OX=10090 GN=Myh10 PE=1 SV=1;sp|Q61879|MYH10_MOUSE Myosin-10 OS=Mus musculus OX=10090 GN=Myh10 PE=1 SV=2	3	1	1	1	0	0	1	0	0	0.7	0.7	232.47	2007	2007;2013;1976	0	6.7868	0.7	0	0	7925800	7925800	0	7925800	0
Q8VC60	Q8VC60	Beta-galactosidase-1-like protein	Glb1l	sp|Q8VC60|GLB1L_MOUSE Beta-galactosidase-1-like protein OS=Mus musculus OX=10090 GN=Glb1l PE=1 SV=1	1	1	1	1	1	0	1	1	0	0.9	0.9	73.278	646	646	0	6.7679	0.9	0.9	0	0	0	0	0	0
Q8CHW4	Q8CHW4	Translation initiation factor eIF-2B subunit epsilon	Eif2b5	sp|Q8CHW4|EI2BE_MOUSE Translation initiation factor eIF-2B subunit epsilon OS=Mus musculus OX=10090 GN=Eif2b5 PE=1 SV=1	1	1	1	1	0	0	1	0	0	1.8	1.8	80.085	717	717	0	6.7535	1.8	0	0	5524700	5524700	0	5524700	0
A0A494B9A7;F8WGL3;P18760	A0A494B9A7;F8WGL3;P18760	Cofilin-1	Cfl1	tr|A0A494B9A7|A0A494B9A7_MOUSE Cofilin-1 OS=Mus musculus OX=10090 GN=Cfl1 PE=1 SV=1;tr|F8WGL3|F8WGL3_MOUSE Cofilin-1 OS=Mus musculus OX=10090 GN=Cfl1 PE=1 SV=1;sp|P18760|COF1_MOUSE Cofilin-1 OS=Mus musculus OX=10090 GN=Cfl1 PE=1 SV=3	3	1	1	1	0	0	1	0	0	6.7	6.7	19.714	178	178;227;166	0	6.7495	6.7	0	0	5614500	5614500	0	5614500	0
Q9CZN7	Q9CZN7	Serine hydroxymethyltransferase	Shmt2	sp|Q9CZN7|GLYM_MOUSE Serine hydroxymethyltransferase, mitochondrial OS=Mus musculus OX=10090 GN=Shmt2 PE=1 SV=1	1	1	1	1	0	0	1	0	0	3.2	3.2	55.758	504	504	0	6.746	3.2	0	0	2440300	2440300	0	2440300	0
Q3TUQ5;O35691	Q3TUQ5;O35691	Pinin	Pnn	tr|Q3TUQ5|Q3TUQ5_MOUSE Pinin OS=Mus musculus OX=10090 GN=Pnn PE=1 SV=1;sp|O35691|PININ_MOUSE Pinin OS=Mus musculus OX=10090 GN=Pnn PE=1 SV=4	2	1	1	1	0	0	1	0	0	1.5	1.5	82.504	726	726;725	0	6.7423	1.5	0	0	2134900	2134900	0	2134900	0
I7HLV2;Q6ZWV3;P86048	I7HLV2;Q6ZWV3;P86048	60S ribosomal protein L10;60S ribosomal protein L10-like	Rpl10;Rpl10l	tr|I7HLV2|I7HLV2_MOUSE 60S ribosomal protein L10 (Fragment) OS=Mus musculus OX=10090 GN=Rpl10 PE=1 SV=1;sp|Q6ZWV3|RL10_MOUSE 60S ribosomal protein L10 OS=Mus musculus OX=10090 GN=Rpl10 PE=1 SV=3;sp|P86048|RL10L_MOUSE 60S ribosomal protein L10-like OS=Mus m	3	1	1	1	0	0	1	0	0	4.5	4.5	23.072	201	201;214;214	0	6.7296	4.5	0	0	7024300	7024300	0	7024300	0
Z4YL78;A0A0R4J0K2;K3W4R5;A2AGT5	Z4YL78;A0A0R4J0K2;K3W4R5;A2AGT5	Cytoskeleton-associated protein 5	Ckap5	tr|Z4YL78|Z4YL78_MOUSE Cytoskeleton-associated protein 5 OS=Mus musculus OX=10090 GN=Ckap5 PE=1 SV=1;tr|A0A0R4J0K2|A0A0R4J0K2_MOUSE Cytoskeleton-associated protein 5 OS=Mus musculus OX=10090 GN=Ckap5 PE=1 SV=1;tr|K3W4R5|K3W4R5_MOUSE Cytoskeleton-associated	4	1	1	1	0	0	1	0	0	0.8	0.8	218.71	1972	1972;2011;2032;2032	0	6.7225	0.8	0	0	2480600	2480600	0	2480600	0
A0A286YDB7;A0A286YCT4;A0A286YCG8;Q9CY50	A0A286YDB7;A0A286YCT4;A0A286YCG8;Q9CY50	Translocon-associated protein subunit alpha	Ssr1	tr|A0A286YDB7|A0A286YDB7_MOUSE Translocon-associated protein subunit alpha (Fragment) OS=Mus musculus OX=10090 GN=Ssr1 PE=1 SV=1;tr|A0A286YCT4|A0A286YCT4_MOUSE Translocon-associated protein subunit alpha OS=Mus musculus OX=10090 GN=Ssr1 PE=1 SV=1;tr|A0A286	4	1	1	1	0	0	1	0	0	13	13	13.111	115	115;298;318;286	0	6.7016	13	0	0	5580400	5580400	0	5580400	0
A0A1D5RLS2;A0A1D5RM23;Q9CQF3	A0A1D5RLS2;A0A1D5RM23;Q9CQF3	Cleavage and polyadenylation specificity factor subunit 5	Nudt21	tr|A0A1D5RLS2|A0A1D5RLS2_MOUSE Cleavage and polyadenylation specificity factor subunit 5 (Fragment) OS=Mus musculus OX=10090 GN=Nudt21 PE=1 SV=1;tr|A0A1D5RM23|A0A1D5RM23_MOUSE Cleavage and polyadenylation specificity factor subunit 5 OS=Mus musculus OX=100	3	1	1	1	0	0	1	0	0	10.7	10.7	19.633	169	169;218;227	0	6.6928	10.7	0	0	5770900	5770900	0	5770900	0
A0A0U1RPJ3;Q8CGN5	A0A0U1RPJ3;Q8CGN5	Perilipin-1	Plin1	tr|A0A0U1RPJ3|A0A0U1RPJ3_MOUSE Perilipin-1 (Fragment) OS=Mus musculus OX=10090 GN=Plin1 PE=1 SV=1;sp|Q8CGN5|PLIN1_MOUSE Perilipin-1 OS=Mus musculus OX=10090 GN=Plin1 PE=1 SV=2	2	1	1	1	0	0	1	0	0	7.9	7.9	20.016	190	190;517	0	6.6605	7.9	0	0	28067000	28067000	0	28067000	0
F6Z6F4;Q6PGB8	F6Z6F4;Q6PGB8	Probable global transcription activator SNF2L1	Smarca1	tr|F6Z6F4|F6Z6F4_MOUSE Probable global transcription activator SNF2L1 (Fragment) OS=Mus musculus OX=10090 GN=Smarca1 PE=1 SV=1;sp|Q6PGB8|SMCA1_MOUSE Probable global transcription activator SNF2L1 OS=Mus musculus OX=10090 GN=Smarca1 PE=1 SV=1	2	1	1	1	0	0	1	0	0	2	2	88.595	768	768;1046	0	6.6605	2	0	0	9665100	9665100	0	9665100	0
A0A087WSJ5;A0A087WNN8;Q61263	A0A087WSJ5;A0A087WNN8;Q61263	Sterol O-acyltransferase 1	Soat1	tr|A0A087WSJ5|A0A087WSJ5_MOUSE Sterol O-acyltransferase 1 (Fragment) OS=Mus musculus OX=10090 GN=Soat1 PE=1 SV=1;tr|A0A087WNN8|A0A087WNN8_MOUSE Sterol O-acyltransferase 1 (Fragment) OS=Mus musculus OX=10090 GN=Soat1 PE=1 SV=1;sp|Q61263|SOAT1_MOUSE Sterol O	3	1	1	1	0	0	1	0	0	46.9	46.9	3.7034	32	32;220;540	0	6.66	46.9	0	0	46578000	46578000	0	46578000	0
A0A087WQA4;A0A0A6YXI6;A0A087WPL3;A0A087WQ61;A0A087WQU0;Q8C134;Q9ERD6	A0A087WQA4;A0A0A6YXI6;A0A087WPL3;A0A087WQ61;A0A087WQU0;Q8C134;Q9ERD6	Ras-specific guanine nucleotide-releasing factor RalGPS2	Ralgps2	tr|A0A087WQA4|A0A087WQA4_MOUSE Ras-specific guanine nucleotide-releasing factor RalGPS2 (Fragment) OS=Mus musculus OX=10090 GN=Ralgps2 PE=1 SV=1;tr|A0A0A6YXI6|A0A0A6YXI6_MOUSE Ras-specific guanine nucleotide-releasing factor RalGPS2 OS=Mus musculus OX=1009	7	1	1	1	0	0	1	0	0	16.4	16.4	7.13	67	67;78;128;463;489;523;590	0	6.6419	16.4	0	0	7125400	7125400	0	7125400	0
P14131	P14131	40S ribosomal protein S16	Rps16	sp|P14131|RS16_MOUSE 40S ribosomal protein S16 OS=Mus musculus OX=10090 GN=Rps16 PE=1 SV=4	1	1	1	1	0	0	1	0	0	5.5	5.5	16.445	146	146	0	6.6314	5.5	0	0	0	0	0	0	0
P43277	P43277	Histone H1.3	Hist1h1d	sp|P43277|H13_MOUSE Histone H1.3 OS=Mus musculus OX=10090 GN=H1-3 PE=1 SV=2	1	6	1	6	0	0	1	0	0	24.4	7.2	22.099	221	221	0	6.6027	24.4	0	0	39835000	39835000	0	39835000	0
G3X956;Q920B9	G3X956;Q920B9	FACT complex subunit SPT16	Supt16;Supt16h	tr|G3X956|G3X956_MOUSE FACT complex subunit OS=Mus musculus OX=10090 GN=Supt16 PE=1 SV=1;sp|Q920B9|SP16H_MOUSE FACT complex subunit SPT16 OS=Mus musculus OX=10090 GN=Supt16h PE=1 SV=2	2	1	1	1	0	0	1	0	0	1.1	1.1	119.84	1047	1047;1047	0	6.5829	1.1	0	0	8549100	8549100	0	8549100	0
Q8R029;Q3UA95;Q3THW5;P0C0S6	Q8R029;Q3UA95;Q3THW5;P0C0S6	Histone H2A;Histone H2A.V;Histone H2A.Z	H2afv;H2afz	tr|Q8R029|Q8R029_MOUSE Histone H2A OS=Mus musculus OX=10090 GN=H2az2 PE=2 SV=1;tr|Q3UA95|Q3UA95_MOUSE Histone H2A OS=Mus musculus OX=10090 GN=H2az1 PE=2 SV=1;sp|Q3THW5|H2AV_MOUSE Histone H2A.V OS=Mus musculus OX=10090 GN=H2az2 PE=1 SV=3;sp|P0C0S6|H2AZ_MOUS	4	1	1	1	0	0	1	0	0	15.6	15.6	9.3748	90	90;105;128;128	0	6.565	15.6	0	0	39679000	39679000	0	39679000	0
A0A0U1RQ05;A0A0R4J119;Q7TMB8;Q5SQX6	A0A0U1RQ05;A0A0R4J119;Q7TMB8;Q5SQX6	Cytoplasmic FMR1-interacting protein 1;Cytoplasmic FMR1-interacting protein 2	Cyfip1;Cyfip2	tr|A0A0U1RQ05|A0A0U1RQ05_MOUSE Cytoplasmic FMR1-interacting protein 1 (Fragment) OS=Mus musculus OX=10090 GN=Cyfip1 PE=1 SV=1;tr|A0A0R4J119|A0A0R4J119_MOUSE Cytoplasmic FMR1-interacting protein OS=Mus musculus OX=10090 GN=Cyfip1 PE=1 SV=1;sp|Q7TMB8|CYFP1_M	4	1	1	1	0	0	1	0	0	1.1	1.1	112.79	969	969;1251;1253;1253	0	6.5375	1.1	0	0	20107000	20107000	0	20107000	0
D3Z390;Q921C5	D3Z390;Q921C5	Protein bicaudal D homolog 2	Bicd2	tr|D3Z390|D3Z390_MOUSE Protein bicaudal D homolog 2 OS=Mus musculus OX=10090 GN=Bicd2 PE=1 SV=2;sp|Q921C5|BICD2_MOUSE Protein bicaudal D homolog 2 OS=Mus musculus OX=10090 GN=Bicd2 PE=1 SV=1	2	1	1	1	1	0	1	1	0	1.2	1.2	84.702	746	746;820	0	6.5356	1.2	1.2	0	40095000	0	40095000	0	142530000
Q9JLI8	Q9JLI8	Squamous cell carcinoma antigen recognized by T-cells 3	Sart3	sp|Q9JLI8|SART3_MOUSE Squamous cell carcinoma antigen recognized by T-cells 3 OS=Mus musculus OX=10090 GN=Sart3 PE=1 SV=1	1	1	1	1	0	0	1	0	0	1.5	1.5	109.62	962	962	0	6.5168	1.5	0	0	8408100	8408100	0	8408100	0
Q9DBR7	Q9DBR7	Protein phosphatase 1 regulatory subunit 12A	Ppp1r12a	sp|Q9DBR7|MYPT1_MOUSE Protein phosphatase 1 regulatory subunit 12A OS=Mus musculus OX=10090 GN=Ppp1r12a PE=1 SV=2	1	1	1	1	0	0	1	0	0	1.5	1.5	114.99	1029	1029	0	6.5003	1.5	0	0	1077200	1077200	0	1077200	0
E9Q616	E9Q616		Ahnak	tr|E9Q616|E9Q616_MOUSE AHNAK nucleoprotein (desmoyokin) OS=Mus musculus OX=10090 GN=Ahnak PE=1 SV=1	1	1	1	1	0	0	1	0	0	0.3	0.3	604.25	5656	5656	0	6.4854	0.3	0	0	19006000	19006000	0	19006000	0
A0A0R4J138;P50429	A0A0R4J138;P50429	Arylsulfatase B	Arsb	tr|A0A0R4J138|A0A0R4J138_MOUSE Arylsulfatase B OS=Mus musculus OX=10090 GN=Arsb PE=1 SV=1;sp|P50429|ARSB_MOUSE Arylsulfatase B OS=Mus musculus OX=10090 GN=Arsb PE=1 SV=3	2	1	1	0	1	0	0	1	0	3.9	3.9	59.704	534	534;534	0	6.4538	0	3.9	0	97917000	0	97917000	0	503110000
A0A0R4J0H0;A0A0R4J1G7;A0A3Q4EHV9;A7ISP9;F8WJ93;Q3UMY5	A0A0R4J0H0;A0A0R4J1G7;A0A3Q4EHV9;A7ISP9;F8WJ93;Q3UMY5	Echinoderm microtubule-associated protein-like 4	Eml4	tr|A0A0R4J0H0|A0A0R4J0H0_MOUSE Echinoderm microtubule-associated protein-like 4 OS=Mus musculus OX=10090 GN=Eml4 PE=1 SV=1;tr|A0A0R4J1G7|A0A0R4J1G7_MOUSE Echinoderm microtubule-associated protein-like 4 OS=Mus musculus OX=10090 GN=Eml4 PE=1 SV=1;tr|A0A3Q4E	6	1	1	1	0	0	1	0	0	1.1	1.1	97.507	876	876;919;941;977;988;988	0	6.4246	1.1	0	0	1586300	1586300	0	1586300	0
F6U250;F6V095;F7CHQ7;A2APD7;Q9D6Z1	F6U250;F6V095;F7CHQ7;A2APD7;Q9D6Z1	Nucleolar protein 56	Nop56	tr|F6U250|F6U250_MOUSE Nucleolar protein 56 (Fragment) OS=Mus musculus OX=10090 GN=Nop56 PE=1 SV=1;tr|F6V095|F6V095_MOUSE Nucleolar protein 56 (Fragment) OS=Mus musculus OX=10090 GN=Nop56 PE=1 SV=1;tr|F7CHQ7|F7CHQ7_MOUSE Nucleolar protein 56 (Fragment) OS=	5	1	1	1	0	0	1	0	0	11.1	11.1	15.498	135	135;173;222;296;580	0	6.4196	11.1	0	0	17703000	17703000	0	17703000	0
A0A0A6YW80;G3X8Y3;Q80UM3	A0A0A6YW80;G3X8Y3;Q80UM3	N-alpha-acetyltransferase 15, NatA auxiliary subunit	Naa15	tr|A0A0A6YW80|A0A0A6YW80_MOUSE N-alpha-acetyltransferase 15, NatA auxiliary subunit OS=Mus musculus OX=10090 GN=Naa15 PE=1 SV=1;tr|G3X8Y3|G3X8Y3_MOUSE N-alpha-acetyltransferase 15, NatA auxiliary subunit OS=Mus musculus OX=10090 GN=Naa15 PE=1 SV=1;sp|Q80UM	3	1	1	1	0	0	1	0	0	2	2	95.295	815	815;865;865	0	6.4127	2	0	0	15839000	15839000	0	15839000	0
Q9DC23	Q9DC23	DnaJ homolog subfamily C member 10	Dnajc10	sp|Q9DC23|DJC10_MOUSE DnaJ homolog subfamily C member 10 OS=Mus musculus OX=10090 GN=Dnajc10 PE=1 SV=2	1	1	1	1	0	0	1	0	0	2.3	2.3	90.582	793	793	0	6.4072	2.3	0	0	4792300	4792300	0	4792300	0
A0A0A6YXL3;A0A0A6YX26;P62900	A0A0A6YXL3;A0A0A6YX26;P62900	60S ribosomal protein L31	Rpl31	tr|A0A0A6YXL3|A0A0A6YXL3_MOUSE 60S ribosomal protein L31 OS=Mus musculus OX=10090 GN=Rpl31 PE=1 SV=1;tr|A0A0A6YX26|A0A0A6YX26_MOUSE 60S ribosomal protein L31 OS=Mus musculus OX=10090 GN=Rpl31 PE=1 SV=1;sp|P62900|RL31_MOUSE 60S ribosomal protein L31 OS=Mus	3	1	1	1	0	0	1	0	0	10.3	10.3	9.9416	87	87;129;125	0	6.4025	10.3	0	0	2481000	2481000	0	2481000	0
Q80YQ1;P35441	Q80YQ1;P35441	Thrombospondin-1	Thbs1	tr|Q80YQ1|Q80YQ1_MOUSE Thrombospondin-1 OS=Mus musculus OX=10090 GN=Thbs1 PE=1 SV=1;sp|P35441|TSP1_MOUSE Thrombospondin-1 OS=Mus musculus OX=10090 GN=Thbs1 PE=1 SV=1	2	1	1	1	0	0	1	0	0	1	1	129.69	1171	1171;1170	0	6.4014	1	0	0	33433000	33433000	0	33433000	0
P29351	P29351	Tyrosine-protein phosphatase non-receptor type 6	Ptpn6	sp|P29351|PTN6_MOUSE Tyrosine-protein phosphatase non-receptor type 6 OS=Mus musculus OX=10090 GN=Ptpn6 PE=1 SV=2	1	1	1	1	0	0	1	0	0	3.5	3.5	67.558	595	595	0	6.3778	3.5	0	0	18948000	18948000	0	18948000	0
A0A1L1SRW0;P14206	A0A1L1SRW0;P14206	40S ribosomal protein SA	Rpsa	tr|A0A1L1SRW0|A0A1L1SRW0_MOUSE 40S ribosomal protein SA (Fragment) OS=Mus musculus OX=10090 GN=Rpsa PE=1 SV=1;sp|P14206|RSSA_MOUSE 40S ribosomal protein SA OS=Mus musculus OX=10090 GN=Rpsa PE=1 SV=4	2	1	1	1	0	0	1	0	0	14	14	10.125	93	93;295	0	6.3753	14	0	0	11961000	11961000	0	11961000	0
Q8VIM6	Q8VIM6	Stereocilin	Strc	sp|Q8VIM6|STRC_MOUSE Stereocilin OS=Mus musculus OX=10090 GN=Strc PE=2 SV=2	1	1	1	0	1	0	0	1	0	0.4	0.4	196.34	1809	1809	0	6.3744	0	0.4	0	17403000	0	17403000	0	89421000
P30681	P30681	High mobility group protein B2	Hmgb2	sp|P30681|HMGB2_MOUSE High mobility group protein B2 OS=Mus musculus OX=10090 GN=Hmgb2 PE=1 SV=3	1	1	1	1	0	0	1	0	0	7.6	7.6	24.162	210	210	0	6.3743	7.6	0	0	45863000	45863000	0	45863000	0
F8WHM5;Q61543	F8WHM5;Q61543	Golgi apparatus protein 1	Glg1	tr|F8WHM5|F8WHM5_MOUSE Golgi apparatus protein 1 (Fragment) OS=Mus musculus OX=10090 GN=Glg1 PE=1 SV=1;sp|Q61543|GSLG1_MOUSE Golgi apparatus protein 1 OS=Mus musculus OX=10090 GN=Glg1 PE=1 SV=1	2	1	1	1	0	0	1	0	0	1.1	1.1	132.35	1163	1163;1175	0	6.369	1.1	0	0	2402200	2402200	0	2402200	0
Q3UIR3	Q3UIR3	E3 ubiquitin-protein ligase DTX3L	Dtx3l	sp|Q3UIR3|DTX3L_MOUSE E3 ubiquitin-protein ligase DTX3L OS=Mus musculus OX=10090 GN=Dtx3l PE=1 SV=1	1	1	1	1	0	0	1	0	0	2.3	2.3	83.043	748	748	0	6.36	2.3	0	0	10227000	10227000	0	10227000	0
Q5XJY5	Q5XJY5	Coatomer subunit delta	Arcn1	sp|Q5XJY5|COPD_MOUSE Coatomer subunit delta OS=Mus musculus OX=10090 GN=Arcn1 PE=1 SV=2	1	1	1	1	0	0	1	0	0	1.6	1.6	57.229	511	511	0	6.3598	1.6	0	0	0	0	0	0	0
Z4YKT6;Q99J47	Z4YKT6;Q99J47	Dehydrogenase/reductase SDR family member 7B	Dhrs7b	tr|Z4YKT6|Z4YKT6_MOUSE Dehydrogenase/reductase SDR family member 7B OS=Mus musculus OX=10090 GN=Dhrs7b PE=1 SV=1;sp|Q99J47|DRS7B_MOUSE Dehydrogenase/reductase SDR family member 7B OS=Mus musculus OX=10090 GN=Dhrs7b PE=1 SV=1	2	1	1	1	0	0	1	0	0	2.9	2.9	33.225	308	308;323	0	6.3446	2.9	0	0	1615400	1615400	0	1615400	0
Q7TNV0	Q7TNV0	Protein DEK	Dek	sp|Q7TNV0|DEK_MOUSE Protein DEK OS=Mus musculus OX=10090 GN=Dek PE=1 SV=1	1	1	1	1	0	0	1	0	0	3.7	3.7	43.158	380	380	0	6.3412	3.7	0	0	3311500	3311500	0	3311500	0
G3UXT7;Q8CFQ9;P56959	G3UXT7;Q8CFQ9;P56959	RNA-binding protein FUS	Fus	tr|G3UXT7|G3UXT7_MOUSE RNA-binding protein FUS (Fragment) OS=Mus musculus OX=10090 GN=Fus PE=1 SV=1;tr|Q8CFQ9|Q8CFQ9_MOUSE Fusion, derived from t(1216) malignant liposarcoma (Human) OS=Mus musculus OX=10090 GN=Fus PE=1 SV=1;sp|P56959|FUS_MOUSE RNA-binding	3	1	1	1	0	0	1	0	0	12.3	12.3	13.897	130	130;517;518	0	6.3383	12.3	0	0	56332000	56332000	0	56332000	0
A0A087WPF9;A0A087WQS2;Q9CQC6	A0A087WPF9;A0A087WQS2;Q9CQC6	Basic leucine zipper and W2 domain-containing protein 1	Bzw1	tr|A0A087WPF9|A0A087WPF9_MOUSE eIF5-mimic protein 2 (Fragment) OS=Mus musculus OX=10090 GN=Bzw1 PE=1 SV=1;tr|A0A087WQS2|A0A087WQS2_MOUSE eIF5-mimic protein 2 OS=Mus musculus OX=10090 GN=Bzw1 PE=1 SV=1;sp|Q9CQC6|5MP2_MOUSE eIF5-mimic protein 2 OS=Mus muscul	3	1	1	1	0	0	1	0	0	5.9	5.9	29.032	253	253;451;419	0	6.3252	5.9	0	0	20602000	20602000	0	20602000	0
A0A1W2P8C0	A0A1W2P8C0			tr|A0A1W2P8C0|A0A1W2P8C0_MOUSE Band 4.1-like protein 2 (Fragment) OS=Mus musculus OX=10090 GN=Epb41l2 PE=1 SV=1	1	1	1	0	0	1	0	0	1	4.4	4.4	22.248	204	204	0	6.3126	0	0	4.4	17112000	0	0	0	0
Q3UI14;A0A286YDJ6;Q6ZPY7	Q3UI14;A0A286YDJ6;Q6ZPY7	Lysine-specific demethylase 3B	Kdm3b	tr|Q3UI14|Q3UI14_MOUSE Lysine-specific demethylase 3B OS=Mus musculus OX=10090 GN=Kdm3b PE=1 SV=1;tr|A0A286YDJ6|A0A286YDJ6_MOUSE Lysine-specific demethylase 3B OS=Mus musculus OX=10090 GN=Kdm3b PE=1 SV=1;sp|Q6ZPY7|KDM3B_MOUSE Lysine-specific demethylase 3B	3	1	1	1	0	0	1	0	0	2.3	2.3	51.172	481	481;1333;1762	0	6.3065	2.3	0	0	0	0	0	0	0
E9Q279;E9QMW9;Q8CB58;Q8BGJ5;Q922I7;P17225	E9Q279;E9QMW9;Q8CB58;Q8BGJ5;Q922I7;P17225	Polypyrimidine tract-binding protein 1	Ptbp1	tr|E9Q279|E9Q279_MOUSE Polypyrimidine tract-binding protein 1 OS=Mus musculus OX=10090 GN=Ptbp1 PE=1 SV=1;tr|E9QMW9|E9QMW9_MOUSE Polypyrimidine tract-binding protein 1 OS=Mus musculus OX=10090 GN=Ptbp1 PE=1 SV=1;tr|Q8CB58|Q8CB58_MOUSE Polypyrimidine tract-	6	1	1	1	0	0	1	0	0	22.6	22.6	6.428	62	62;353;489;529;555;527	0	6.2851	22.6	0	0	2213500	2213500	0	2213500	0
P68372	P68372	Tubulin beta-4B chain	Tubb4b	sp|P68372|TBB4B_MOUSE Tubulin beta-4B chain OS=Mus musculus OX=10090 GN=Tubb4b PE=1 SV=1	1	6	1	6	0	0	1	0	0	14.2	2.7	49.83	445	445	0	6.2773	14.2	0	0	6666300	6666300	0	6666300	0
A0A1W2P7S8;Q6A068	A0A1W2P7S8;Q6A068	Cell division cycle 5-like protein	Cdc5l	tr|A0A1W2P7S8|A0A1W2P7S8_MOUSE Predicted gene, 32717 OS=Mus musculus OX=10090 GN=Gm32717 PE=1 SV=1;sp|Q6A068|CDC5L_MOUSE Cell division cycle 5-like protein OS=Mus musculus OX=10090 GN=Cdc5l PE=1 SV=2	2	1	1	1	0	0	1	0	0	1.9	1.9	92.162	802	802;802	0	6.2665	1.9	0	0	5248400	5248400	0	5248400	0
Q91YR7	Q91YR7	Pre-mRNA-processing factor 6	Prpf6	sp|Q91YR7|PRP6_MOUSE Pre-mRNA-processing factor 6 OS=Mus musculus OX=10090 GN=Prpf6 PE=1 SV=1	1	1	1	1	0	0	1	0	0	1.4	1.4	106.72	941	941	0	6.2586	1.4	0	0	1320600	1320600	0	1320600	0
S4R238;Q9D9P1;D3Z0L4;Q9CRB9	S4R238;Q9D9P1;D3Z0L4;Q9CRB9	MICOS complex subunit Mic19	Chchd3	tr|S4R238|S4R238_MOUSE MICOS complex subunit Mic19 OS=Mus musculus OX=10090 GN=Chchd3 PE=1 SV=1;tr|Q9D9P1|Q9D9P1_MOUSE MICOS complex subunit Mic19 OS=Mus musculus OX=10090 GN=Chchd3 PE=1 SV=1;tr|D3Z0L4|D3Z0L4_MOUSE MICOS complex subunit Mic19 (Fragment) OS	4	1	1	1	0	0	1	0	0	17.9	17.9	9.4173	84	84;175;192;227	0	6.2183	17.9	0	0	6939500	6939500	0	6939500	0
A0A1D5RLR3;Q8C5L7	A0A1D5RLR3;Q8C5L7	RNA-binding protein 34	Rbm34	tr|A0A1D5RLR3|A0A1D5RLR3_MOUSE RNA-binding protein 34 OS=Mus musculus OX=10090 GN=Rbm34 PE=1 SV=1;sp|Q8C5L7|RBM34_MOUSE RNA-binding protein 34 OS=Mus musculus OX=10090 GN=Rbm34 PE=1 SV=2	2	1	1	1	0	0	1	0	0	2.6	2.6	46.699	422	422;442	0	6.1839	2.6	0	0	0	0	0	0	0
Q99MQ4	Q99MQ4	Asporin	Aspn	sp|Q99MQ4|ASPN_MOUSE Asporin OS=Mus musculus OX=10090 GN=Aspn PE=1 SV=1	1	1	1	1	0	0	1	0	0	2.9	2.9	42.572	373	373	0	6.1803	2.9	0	0	4581300	4581300	0	4581300	0
A0A494B9D7;Q8VE10	A0A494B9D7;Q8VE10	N-alpha-acetyltransferase 40	Naa40	tr|A0A494B9D7|A0A494B9D7_MOUSE N-alpha-acetyltransferase 40 OS=Mus musculus OX=10090 GN=Naa40 PE=1 SV=1;sp|Q8VE10|NAA40_MOUSE N-alpha-acetyltransferase 40 OS=Mus musculus OX=10090 GN=Naa40 PE=1 SV=1	2	1	1	1	0	0	1	0	0	6.3	6.3	22.321	191	191;237	0	6.1719	6.3	0	0	8192100	8192100	0	8192100	0
Q8BH95	Q8BH95	Enoyl-CoA hydratase, mitochondrial	Echs1	sp|Q8BH95|ECHM_MOUSE Enoyl-CoA hydratase, mitochondrial OS=Mus musculus OX=10090 GN=Echs1 PE=1 SV=1	1	1	1	1	0	0	1	0	0	4.1	4.1	31.474	290	290	0	6.1614	4.1	0	0	1581700	1581700	0	1581700	0
A0A3Q4EGP3;S4R1N6;F6YVP7;P62270	A0A3Q4EGP3;S4R1N6;F6YVP7;P62270	40S ribosomal protein S18	Rps18;Gm10260	tr|A0A3Q4EGP3|A0A3Q4EGP3_MOUSE 40S ribosomal protein S18 OS=Mus musculus OX=10090 GN=Rps18 PE=4 SV=1;tr|S4R1N6|S4R1N6_MOUSE 40S ribosomal protein S18 OS=Mus musculus OX=10090 GN=Rps18 PE=3 SV=1;tr|F6YVP7|F6YVP7_MOUSE 40S ribosomal protein S18 OS=Mus muscul	4	1	1	1	0	0	1	0	0	34.2	34.2	4.2981	38	38;107;152;152	0	6.149	34.2	0	0	4570400	4570400	0	4570400	0
Q60972	Q60972	Histone-binding protein RBBP4	Rbbp4	sp|Q60972|RBBP4_MOUSE Histone-binding protein RBBP4 OS=Mus musculus OX=10090 GN=Rbbp4 PE=1 SV=5	1	1	1	1	0	0	1	0	0	3.3	3.3	47.655	425	425	0	6.1476	3.3	0	0	5752300	5752300	0	5752300	0
P56379	P56379	6.8 kDa mitochondrial proteolipid	Mp68	sp|P56379|ATP68_MOUSE ATP synthase subunit ATP5MJ, mitochondrial OS=Mus musculus OX=10090 GN=Atp5mj PE=1 SV=1	1	1	1	0	0	1	0	0	1	20.7	20.7	6.6979	58	58	0	6.1467	0	0	20.7	25916000	0	0	0	0
Q6P5D8	Q6P5D8	Structural maintenance of chromosomes flexible hinge domain-containing protein 1	Smchd1	sp|Q6P5D8|SMHD1_MOUSE Structural maintenance of chromosomes flexible hinge domain-containing protein 1 OS=Mus musculus OX=10090 GN=Smchd1 PE=1 SV=2	1	1	1	1	0	0	1	0	0	0.8	0.8	225.65	2007	2007	0	6.1403	0.8	0	0	2561300	2561300	0	2561300	0
Q8BJY7;Q922B2	Q8BJY7;Q922B2	Aspartate--tRNA ligase, cytoplasmic	Dars	tr|Q8BJY7|Q8BJY7_MOUSE Aspartyl-tRNA synthetase OS=Mus musculus OX=10090 GN=Dars PE=1 SV=1;sp|Q922B2|SYDC_MOUSE Aspartate--tRNA ligase, cytoplasmic OS=Mus musculus OX=10090 GN=Dars1 PE=1 SV=2	2	1	1	1	0	0	1	0	0	14.9	14.9	10.218	87	87;501	0	6.125	14.9	0	0	9969700	9969700	0	9969700	0
A2AQ19	A2AQ19	RNA polymerase-associated protein RTF1 homolog	Rtf1	sp|A2AQ19|RTF1_MOUSE RNA polymerase-associated protein RTF1 homolog OS=Mus musculus OX=10090 GN=Rtf1 PE=1 SV=1	1	1	1	1	0	0	1	0	0	1.7	1.7	80.796	715	715	0	6.1223	1.7	0	0	6737400	6737400	0	6737400	0
Q9Z0H8	Q9Z0H8	CAP-Gly domain-containing linker protein 2	Clip2	sp|Q9Z0H8|CLIP2_MOUSE CAP-Gly domain-containing linker protein 2 OS=Mus musculus OX=10090 GN=Clip2 PE=1 SV=2	1	1	1	1	0	0	1	0	0	1.6	1.6	115.91	1047	1047	0	6.1209	1.6	0	0	2945900	2945900	0	2945900	0
Q8BTU1	Q8BTU1	Cilia- and flagella-associated protein 20	Cfap20	sp|Q8BTU1|CFA20_MOUSE Cilia- and flagella-associated protein 20 OS=Mus musculus OX=10090 GN=Cfap20 PE=1 SV=1	1	1	1	1	0	0	1	0	0	6.2	6.2	22.748	193	193	0	6.1164	6.2	0	0	9286200	9286200	0	9286200	0
Q31125	Q31125	Zinc transporter SLC39A7	Slc39a7	sp|Q31125|S39A7_MOUSE Zinc transporter SLC39A7 OS=Mus musculus OX=10090 GN=Slc39a7 PE=1 SV=2	1	1	1	1	0	0	1	0	0	3.2	3.2	50.656	476	476	0	6.1075	3.2	0	0	3047700	3047700	0	3047700	0
D3Z2T9;P11440	D3Z2T9;P11440	Cyclin-dependent kinase 1	Cdk1	tr|D3Z2T9|D3Z2T9_MOUSE Cyclin-dependent kinase 1 (Fragment) OS=Mus musculus OX=10090 GN=Cdk1 PE=1 SV=1;sp|P11440|CDK1_MOUSE Cyclin-dependent kinase 1 OS=Mus musculus OX=10090 GN=Cdk1 PE=1 SV=3	2	1	1	1	0	0	1	0	0	5	5	22.893	200	200;297	0	6.1016	5	0	0	0	0	0	0	0
Q8BU30	Q8BU30	Isoleucine--tRNA ligase, cytoplasmic	Iars	sp|Q8BU30|SYIC_MOUSE Isoleucine--tRNA ligase, cytoplasmic OS=Mus musculus OX=10090 GN=Iars1 PE=1 SV=2	1	1	1	1	0	0	1	0	0	1.3	1.3	144.27	1262	1262	0	6.098	1.3	0	0	3222700	3222700	0	3222700	0
A2AM65;Z4YKA3;Z4YKB8;Q3TEA8	A2AM65;Z4YKA3;Z4YKB8;Q3TEA8	Heterochromatin protein 1-binding protein 3	Hp1bp3	tr|A2AM65|A2AM65_MOUSE Heterochromatin protein 1-binding protein 3 (Fragment) OS=Mus musculus OX=10090 GN=Hp1bp3 PE=1 SV=1;tr|Z4YKA3|Z4YKA3_MOUSE Heterochromatin protein 1-binding protein 3 OS=Mus musculus OX=10090 GN=Hp1bp3 PE=1 SV=1;tr|Z4YKB8|Z4YKB8_MOUS	4	1	1	1	0	0	1	0	0	3.8	3.8	32.539	292	292;516;554;554	0	6.0928	3.8	0	0	11484000	11484000	0	11484000	0
P48678	P48678	Prelamin-A/C;Lamin-A/C	Lmna	sp|P48678|LMNA_MOUSE Prelamin-A/C OS=Mus musculus OX=10090 GN=Lmna PE=1 SV=2	1	1	1	1	0	0	1	0	0	1.5	1.5	74.237	665	665	0	6.0837	1.5	0	0	0	0	0	0	0
Q8K561	Q8K561	Otoancorin	Otoa	sp|Q8K561|OTOAN_MOUSE Otoancorin OS=Mus musculus OX=10090 GN=Otoa PE=2 SV=1	1	1	1	0	1	0	0	1	0	0.7	0.7	126.43	1137	1137	0	6.0818	0	0.7	0	36173000	0	36173000	0	185860000
Q91ZV4	Q91ZV4	2-acylglycerol O-acyltransferase 1	Mogat1	sp|Q91ZV4|MOGT1_MOUSE 2-acylglycerol O-acyltransferase 1 OS=Mus musculus OX=10090 GN=Mogat1 PE=1 SV=2	1	1	1	0	1	0	0	1	0	2.7	2.7	38.791	335	335	0	6.0768	0	2.7	0	100120000	0	100120000	0	514400000
P63276	P63276	40S ribosomal protein S17	Rps17	sp|P63276|RS17_MOUSE 40S ribosomal protein S17 OS=Mus musculus OX=10090 GN=Rps17 PE=1 SV=2	1	1	1	1	0	0	1	0	0	7.4	7.4	15.524	135	135	0	6.0692	7.4	0	0	9017400	9017400	0	9017400	0
F6XVM5;A0A338P776;Q9DB20	F6XVM5;A0A338P776;Q9DB20	ATP synthase subunit O, mitochondrial	Atp5o	tr|F6XVM5|F6XVM5_MOUSE ATP synthase subunit O, mitochondrial (Fragment) OS=Mus musculus OX=10090 GN=Atp5o PE=1 SV=1;tr|A0A338P776|A0A338P776_MOUSE ATP synthase subunit O, mitochondrial (Fragment) OS=Mus musculus OX=10090 GN=Atp5o PE=1 SV=1;sp|Q9DB20|ATPO_M	3	1	1	1	0	0	1	0	0	15.5	15.5	7.8391	71	71;109;213	0	6.0645	15.5	0	0	10630000	10630000	0	10630000	0
A0A1L1SQS5;Q80XP8	A0A1L1SQS5;Q80XP8	Protein FAM76B	Fam76b	tr|A0A1L1SQS5|A0A1L1SQS5_MOUSE Protein FAM76B (Fragment) OS=Mus musculus OX=10090 GN=Fam76b PE=1 SV=1;sp|Q80XP8|FA76B_MOUSE Protein FAM76B OS=Mus musculus OX=10090 GN=Fam76b PE=1 SV=1	2	1	1	0	1	0	0	1	0	10.8	10.8	8.6919	74	74;339	0	6.063	0	10.8	0	365850	0	365850	0	1879800
A0A0J9YVC1;A0A0J9YUC1;E9Q770;A0A0J9YUS5;E9PVC6;E9Q9E1;E9PVC5;Q6NZJ6	A0A0J9YVC1;A0A0J9YUC1;E9Q770;A0A0J9YUS5;E9PVC6;E9Q9E1;E9PVC5;Q6NZJ6	Eukaryotic translation initiation factor 4 gamma 1	Eif4g1	tr|A0A0J9YVC1|A0A0J9YVC1_MOUSE Eukaryotic translation initiation factor 4 gamma 1 (Fragment) OS=Mus musculus OX=10090 GN=Eif4g1 PE=1 SV=1;tr|A0A0J9YUC1|A0A0J9YUC1_MOUSE Eukaryotic translation initiation factor 4 gamma 1 (Fragment) OS=Mus musculus OX=10090	8	1	1	1	0	0	1	0	0	1.6	1.6	86.999	795	795;900;958;1303;1553;1593;1594;1600	0	6.0594	1.6	0	0	8082500	8082500	0	8082500	0
Q61578	Q61578	NADPH:adrenodoxin oxidoreductase, mitochondrial	Fdxr	sp|Q61578|ADRO_MOUSE NADPH:adrenodoxin oxidoreductase, mitochondrial OS=Mus musculus OX=10090 GN=Fdxr PE=1 SV=1	1	1	1	1	0	0	1	0	0	2.8	2.8	54.201	494	494	0	6.0545	2.8	0	0	0	0	0	0	0
P27048;P63163	P27048;P63163	Small nuclear ribonucleoprotein-associated protein B;Small nuclear ribonucleoprotein-associated protein N	Snrpb;Snrpn	sp|P27048|RSMB_MOUSE Small nuclear ribonucleoprotein-associated protein B OS=Mus musculus OX=10090 GN=Snrpb PE=1 SV=1;sp|P63163|RSMN_MOUSE Small nuclear ribonucleoprotein-associated protein N OS=Mus musculus OX=10090 GN=Snrpn PE=1 SV=1	2	1	1	1	0	0	1	0	0	3.9	3.9	23.656	231	231;240	0	6.0523	3.9	0	0	4125600	4125600	0	4125600	0
Q542V3;Q8VE97	Q542V3;Q8VE97	Serine/arginine-rich splicing factor 4	Srsf4	tr|Q542V3|Q542V3_MOUSE Serine/arginine-rich-splicing factor 4 OS=Mus musculus OX=10090 GN=Srsf4 PE=1 SV=1;sp|Q8VE97|SRSF4_MOUSE Serine/arginine-rich splicing factor 4 OS=Mus musculus OX=10090 GN=Srsf4 PE=2 SV=1	2	2	1	2	0	0	1	0	0	3.7	1.8	56.248	491	491;489	0	6.0396	3.7	0	0	976720	976720	0	976720	0
Q8VIJ6	Q8VIJ6	Splicing factor, proline- and glutamine-rich	Sfpq	sp|Q8VIJ6|SFPQ_MOUSE Splicing factor, proline- and glutamine-rich OS=Mus musculus OX=10090 GN=Sfpq PE=1 SV=1	1	1	1	1	0	0	1	0	0	1.7	1.7	75.441	699	699	0	6.0325	1.7	0	0	7546800	7546800	0	7546800	0
Q8BIZ0	Q8BIZ0	Protocadherin-20	Pcdh20	sp|Q8BIZ0|PCD20_MOUSE Protocadherin-20 OS=Mus musculus OX=10090 GN=Pcdh20 PE=2 SV=3	1	1	1	1	0	0	1	0	0	1.1	1.1	104.74	952	952	0	6.0275	1.1	0	0	17723000	17723000	0	17723000	0
G5E8R8;Q6P5G6	G5E8R8;Q6P5G6	UBX domain-containing protein 7	Ubxn7	tr|G5E8R8|G5E8R8_MOUSE UBX domain-containing protein 7 OS=Mus musculus OX=10090 GN=Ubxn7 PE=1 SV=1;sp|Q6P5G6|UBXN7_MOUSE UBX domain-containing protein 7 OS=Mus musculus OX=10090 GN=Ubxn7 PE=1 SV=2	2	1	1	1	0	0	1	0	0	2.7	2.7	54.812	489	489;467	0	6.0265	2.7	0	0	4549200	4549200	0	4549200	0
S4R1Y6;A0A1D5RLZ3;A0A087WSP0;E9Q9X1;S4R1P5;Q91ZU6	S4R1Y6;A0A1D5RLZ3;A0A087WSP0;E9Q9X1;S4R1P5;Q91ZU6	Dystonin	Dst	tr|S4R1Y6|S4R1Y6_MOUSE Dystonin (Fragment) OS=Mus musculus OX=10090 GN=Dst PE=1 SV=2;tr|A0A1D5RLZ3|A0A1D5RLZ3_MOUSE Dystonin (Fragment) OS=Mus musculus OX=10090 GN=Dst PE=1 SV=1;tr|A0A087WSP0|A0A087WSP0_MOUSE Dystonin OS=Mus musculus OX=10090 GN=Dst PE=1 S	6	1	1	0	1	0	0	1	0	0.7	0.7	186.94	1638	1638;1674;5175;7406;7717;7393	0	6.016	0	0.7	0	849140000	0	849140000	0	4363000000
E9Q2J8;Q8BUG5	E9Q2J8;Q8BUG5	Calcyphosin-2	Caps2	tr|E9Q2J8|E9Q2J8_MOUSE Calcyphosin-2 OS=Mus musculus OX=10090 GN=Caps2 PE=4 SV=1;sp|Q8BUG5|CAYP2_MOUSE Calcyphosin-2 OS=Mus musculus OX=10090 GN=Caps2 PE=2 SV=2	2	1	1	0	1	0	0	1	0	2.5	2.5	67.433	592	592;550	0	6.0152	0	2.5	0	283610000	0	283610000	0	1457200000
P18608	P18608	Non-histone chromosomal protein HMG-14	Hmgn1	sp|P18608|HMGN1_MOUSE Non-histone chromosomal protein HMG-14 OS=Mus musculus OX=10090 GN=Hmgn1 PE=1 SV=2	1	1	1	1	0	0	1	0	0	12.5	12.5	10.152	96	96	0	6.0137	12.5	0	0	3345900	3345900	0	3345900	0
Q3TCJ8	Q3TCJ8	Coiled-coil domain-containing protein 69	Ccdc69	sp|Q3TCJ8|CCD69_MOUSE Coiled-coil domain-containing protein 69 OS=Mus musculus OX=10090 GN=Ccdc69 PE=1 SV=1	1	1	1	0	1	0	0	1	0	4	4	23.296	202	202	0	6.0125	0	4	0	0	0	0	0	0
A2A7S7;Q91WQ3	A2A7S7;Q91WQ3	Tyrosine--tRNA ligase;Tyrosine--tRNA ligase, cytoplasmic;Tyrosine--tRNA ligase, cytoplasmic, N-terminally processed	Yars	tr|A2A7S7|A2A7S7_MOUSE Tyrosine--tRNA ligase OS=Mus musculus OX=10090 GN=Yars PE=1 SV=1;sp|Q91WQ3|SYYC_MOUSE Tyrosine--tRNA ligase, cytoplasmic OS=Mus musculus OX=10090 GN=Yars1 PE=1 SV=3	2	1	1	1	0	0	1	0	0	2	2	63.001	564	564;528	0	6.0118	2	0	0	0	0	0	0	0
P63037	P63037	DnaJ homolog subfamily A member 1	Dnaja1	sp|P63037|DNJA1_MOUSE DnaJ homolog subfamily A member 1 OS=Mus musculus OX=10090 GN=Dnaja1 PE=1 SV=1	1	1	1	1	0	0	1	0	0	3.8	3.8	44.868	397	397	0	6.0113	3.8	0	0	1012200	1012200	0	1012200	0
A2ANF5	A2ANF5		Tmem29	tr|A2ANF5|A2ANF5_MOUSE Transmembrane protein 29 OS=Mus musculus OX=10090 GN=Tmem29 PE=4 SV=1	1	1	1	0	1	0	0	1	0	7.8	7.8	23.155	204	204	0	6.0069	0	7.8	0	13547000	0	13547000	0	69607000
Q923D5	Q923D5	WW domain-binding protein 11	Wbp11	sp|Q923D5|WBP11_MOUSE WW domain-binding protein 11 OS=Mus musculus OX=10090 GN=Wbp11 PE=1 SV=2	1	1	1	1	0	0	1	0	0	2.2	2.2	69.874	641	641	0	6.0042	2.2	0	0	0	0	0	0	0
Q9QXK3	Q9QXK3	Coatomer subunit gamma-2	Copg2	sp|Q9QXK3|COPG2_MOUSE Coatomer subunit gamma-2 OS=Mus musculus OX=10090 GN=Copg2 PE=1 SV=1	1	1	1	1	0	0	1	0	0	1.4	1.4	97.679	871	871	0	6.0026	1.4	0	0	4718500	4718500	0	4718500	0
Q7TPV4	Q7TPV4	Myb-binding protein 1A	Mybbp1a	sp|Q7TPV4|MBB1A_MOUSE Myb-binding protein 1A OS=Mus musculus OX=10090 GN=Mybbp1a PE=1 SV=2	1	1	1	1	0	0	1	0	0	1	1	152.04	1344	1344	0	6.0011	1	0	0	2289900	2289900	0	2289900	0
O54941	O54941	SWI/SNF-related matrix-associated actin-dependent regulator of chromatin subfamily E member 1	Smarce1	sp|O54941|SMCE1_MOUSE SWI/SNF-related matrix-associated actin-dependent regulator of chromatin subfamily E member 1 OS=Mus musculus OX=10090 GN=Smarce1 PE=1 SV=1	1	1	1	1	0	0	1	0	0	3.6	3.6	46.638	411	411	0	5.9948	3.6	0	0	14118000	14118000	0	14118000	0
A0A3B2WDB3;Q3UN02	A0A3B2WDB3;Q3UN02	Lysocardiolipin acyltransferase 1	Lclat1	tr|A0A3B2WDB3|A0A3B2WDB3_MOUSE Lysocardiolipin acyltransferase 1 (Fragment) OS=Mus musculus OX=10090 GN=Lclat1 PE=1 SV=1;sp|Q3UN02|LCLT1_MOUSE Lysocardiolipin acyltransferase 1 OS=Mus musculus OX=10090 GN=Lclat1 PE=1 SV=2	2	1	1	1	0	0	1	0	0	2.8	2.8	41.839	355	355;376	0	5.9936	2.8	0	0	0	0	0	0	0
A0A0G2JES3;A0A140T8T4;P51410	A0A0G2JES3;A0A140T8T4;P51410	60S ribosomal protein L9	Rpl9	tr|A0A0G2JES3|A0A0G2JES3_MOUSE 60S ribosomal protein L9 (Fragment) OS=Mus musculus OX=10090 GN=Rpl9 PE=1 SV=1;tr|A0A140T8T4|A0A140T8T4_MOUSE 60S ribosomal protein L9 OS=Mus musculus OX=10090 GN=Rpl9-ps6 PE=3 SV=1;sp|P51410|RL9_MOUSE 60S ribosomal protein L	3	1	1	1	0	0	1	0	0	5.2	5.2	21.622	191	191;192;192	0	5.992	5.2	0	0	21777000	21777000	0	21777000	0
Q5SQ20;Q9EQ61	Q5SQ20;Q9EQ61	Pescadillo homolog	Pes1	tr|Q5SQ20|Q5SQ20_MOUSE Pescadillo homolog OS=Mus musculus OX=10090 GN=Pes1 PE=1 SV=1;sp|Q9EQ61|PESC_MOUSE Pescadillo homolog OS=Mus musculus OX=10090 GN=Pes1 PE=1 SV=1	2	1	1	1	0	0	1	0	0	1.7	1.7	68.23	588	588;584	0	5.9886	1.7	0	0	1495600	1495600	0	1495600	0
A0A087WNS0;A0A087WQK0;P27659	A0A087WNS0;A0A087WQK0;P27659	60S ribosomal protein L3	Rpl3	tr|A0A087WNS0|A0A087WNS0_MOUSE 60S ribosomal protein L3 OS=Mus musculus OX=10090 GN=Rpl3 PE=1 SV=1;tr|A0A087WQK0|A0A087WQK0_MOUSE 60S ribosomal protein L3 (Fragment) OS=Mus musculus OX=10090 GN=Rpl3 PE=1 SV=1;sp|P27659|RL3_MOUSE 60S ribosomal protein L3 OS	3	1	1	1	0	0	1	0	0	5	5	19.773	180	180;188;403	0	5.9881	5	0	0	15161000	15161000	0	15161000	0
P62830	P62830	60S ribosomal protein L23	Rpl23	sp|P62830|RL23_MOUSE 60S ribosomal protein L23 OS=Mus musculus OX=10090 GN=Rpl23 PE=1 SV=1	1	1	1	1	0	0	1	0	0	6.4	6.4	14.865	140	140	0	5.9861	6.4	0	0	2636300	2636300	0	2636300	0
P30115	P30115	Glutathione S-transferase A3	Gsta3	sp|P30115|GSTA3_MOUSE Glutathione S-transferase A3 OS=Mus musculus OX=10090 GN=Gsta3 PE=1 SV=2	1	1	1	1	0	0	1	0	0	5.4	5.4	25.36	221	221	0	5.9845	5.4	0	0	10341000	10341000	0	10341000	0
A0A0G2JER8;Q6P6J4	A0A0G2JER8;Q6P6J4	Alpha-ketoglutarate-dependent dioxygenase alkB homolog 2	Alkbh2	tr|A0A0G2JER8|A0A0G2JER8_MOUSE DNA oxidative demethylase ALKBH2 (Fragment) OS=Mus musculus OX=10090 GN=Alkbh2 PE=1 SV=1;sp|Q6P6J4|ALKB2_MOUSE DNA oxidative demethylase ALKBH2 OS=Mus musculus OX=10090 GN=Alkbh2 PE=1 SV=1	2	1	1	0	1	0	0	1	0	22.7	22.7	4.7332	44	44;239	0	5.9729	0	22.7	0	4348900	0	4348900	0	22345000
A0A140LHA2;Q9WVA3	A0A140LHA2;Q9WVA3	Mitotic checkpoint protein BUB3	Bub3	tr|A0A140LHA2|A0A140LHA2_MOUSE Mitotic checkpoint protein BUB3 OS=Mus musculus OX=10090 GN=Bub3 PE=1 SV=1;sp|Q9WVA3|BUB3_MOUSE Mitotic checkpoint protein BUB3 OS=Mus musculus OX=10090 GN=Bub3 PE=1 SV=2	2	1	1	1	0	0	1	0	0	3.1	3.1	36.766	324	324;326	0	5.9684	3.1	0	0	3021700	3021700	0	3021700	0
P21981	P21981	Protein-glutamine gamma-glutamyltransferase 2	Tgm2	sp|P21981|TGM2_MOUSE Protein-glutamine gamma-glutamyltransferase 2 OS=Mus musculus OX=10090 GN=Tgm2 PE=1 SV=4	1	1	1	1	0	0	1	0	0	2.2	2.2	77.06	686	686	0	5.9677	2.2	0	0	4806000	4806000	0	4806000	0
Q80ZI6	Q80ZI6	E3 ubiquitin-protein ligase LRSAM1	Lrsam1	sp|Q80ZI6|LRSM1_MOUSE E3 ubiquitin-protein ligase LRSAM1 OS=Mus musculus OX=10090 GN=Lrsam1 PE=1 SV=1	1	1	1	0	1	0	0	1	0	1.8	1.8	83.976	727	727	0	5.9623	0	1.8	0	0	0	0	0	0
A0A0U1RNP2;E9PYH6	A0A0U1RNP2;E9PYH6	Histone-lysine N-methyltransferase	Setd1a	tr|A0A0U1RNP2|A0A0U1RNP2_MOUSE Predicted gene, 49388 (Fragment) OS=Mus musculus OX=10090 GN=Gm49388 PE=4 SV=1;sp|E9PYH6|SET1A_MOUSE Histone-lysine N-methyltransferase SETD1A OS=Mus musculus OX=10090 GN=Setd1a PE=1 SV=1	2	1	1	1	0	0	1	0	0	1.4	1.4	127.86	1173	1173;1716	0	5.9617	1.4	0	0	6999200	6999200	0	6999200	0
Q99M28	Q99M28	RNA-binding protein with serine-rich domain 1	Rnps1	sp|Q99M28|RNPS1_MOUSE RNA-binding protein with serine-rich domain 1 OS=Mus musculus OX=10090 GN=Rnps1 PE=1 SV=1	1	1	1	1	0	0	1	0	0	4.9	4.9	34.208	305	305	0	5.9586	4.9	0	0	6270200	6270200	0	6270200	0
A0A0J9YUY9;A0A0J9YU94;A0A0J9YVF6;A0A0J9YV01;H9H9S3;A0A0M3HEP2;Q9R0G7	A0A0J9YUY9;A0A0J9YU94;A0A0J9YVF6;A0A0J9YV01;H9H9S3;A0A0M3HEP2;Q9R0G7	Zinc finger E-box-binding homeobox 2	Zeb2	tr|A0A0J9YUY9|A0A0J9YUY9_MOUSE Zinc finger E-box-binding homeobox 2 (Fragment) OS=Mus musculus OX=10090 GN=Zeb2 PE=1 SV=1;tr|A0A0J9YU94|A0A0J9YU94_MOUSE Zinc finger E-box-binding homeobox 2 (Fragment) OS=Mus musculus OX=10090 GN=Zeb2 PE=1 SV=1;tr|A0A0J9YVF	7	1	1	1	0	0	1	0	0	8.7	8.7	20.551	184	184;214;731;1191;1214;1259;1215	0	5.9486	8.7	0	0	1395600	1395600	0	1395600	0
A0A338P6Q0;A0A338P675;P47941	A0A338P6Q0;A0A338P675;P47941	Crk-like protein	Crkl	tr|A0A338P6Q0|A0A338P6Q0_MOUSE Crk-like protein OS=Mus musculus OX=10090 GN=Crkl PE=1 SV=1;tr|A0A338P675|A0A338P675_MOUSE Crk-like protein (Fragment) OS=Mus musculus OX=10090 GN=Crkl PE=1 SV=1;sp|P47941|CRKL_MOUSE Crk-like protein OS=Mus musculus OX=10090	3	1	1	0	1	0	0	1	0	9.3	9.3	12.435	108	108;148;303	0	5.9485	0	9.3	0	1772300	0	1772300	0	9106200
E9Q1V0;F8WJK8;Q99L47	E9Q1V0;F8WJK8;Q99L47	Hsc70-interacting protein	St13	tr|E9Q1V0|E9Q1V0_MOUSE Hsc70-interacting protein (Fragment) OS=Mus musculus OX=10090 GN=St13 PE=1 SV=1;tr|F8WJK8|F8WJK8_MOUSE Hsc70-interacting protein OS=Mus musculus OX=10090 GN=St13 PE=1 SV=1;sp|Q99L47|F10A1_MOUSE Hsc70-interacting protein OS=Mus muscul	3	1	1	1	0	0	1	0	0	7.8	7.8	14.245	129	129;362;371	0	5.9476	7.8	0	0	20692000	20692000	0	20692000	0
P51655	P51655	Glypican-4;Secreted glypican-4	Gpc4	sp|P51655|GPC4_MOUSE Glypican-4 OS=Mus musculus OX=10090 GN=Gpc4 PE=1 SV=2	1	1	1	1	0	0	1	0	0	1.8	1.8	62.586	557	557	0	5.9476	1.8	0	0	927380	927380	0	927380	0
A3KGU5;A3KGU7;E9Q447;A3KGU9;P16546	A3KGU5;A3KGU7;E9Q447;A3KGU9;P16546	Spectrin alpha chain, non-erythrocytic 1	Sptan1	tr|A3KGU5|A3KGU5_MOUSE Spectrin alpha chain, non-erythrocytic 1 OS=Mus musculus OX=10090 GN=Sptan1 PE=1 SV=1;tr|A3KGU7|A3KGU7_MOUSE Spectrin alpha chain, non-erythrocytic 1 OS=Mus musculus OX=10090 GN=Sptan1 PE=1 SV=1;tr|E9Q447|E9Q447_MOUSE Spectrin alpha	5	1	1	1	0	0	1	0	0	0.6	0.6	282.89	2457	2457;2477;2478;2498;2472	0	5.9464	0.6	0	0	3061200	3061200	0	3061200	0
B1AYB5;B1AYB6	B1AYB5;B1AYB6	Methyl-CpG-binding domain protein 5	Mbd5	tr|B1AYB5|B1AYB5_MOUSE Methyl-CpG-binding domain protein 5 OS=Mus musculus OX=10090 GN=Mbd5 PE=4 SV=1;sp|B1AYB6|MBD5_MOUSE Methyl-CpG-binding domain protein 5 OS=Mus musculus OX=10090 GN=Mbd5 PE=2 SV=1	2	1	1	0	1	0	0	1	0	0.5	0.5	183.59	1728	1728;1498	0	5.9407	0	0.5	0	2165000	0	2165000	0	11124000
A2AN81;F6YUI5;B7ZCL7;Q9ESX5	A2AN81;F6YUI5;B7ZCL7;Q9ESX5	H/ACA ribonucleoprotein complex subunit 4	Dkc1	tr|A2AN81|A2AN81_MOUSE H/ACA ribonucleoprotein complex subunit DKC1 (Fragment) OS=Mus musculus OX=10090 GN=Dkc1 PE=1 SV=1;tr|F6YUI5|F6YUI5_MOUSE H/ACA ribonucleoprotein complex subunit DKC1 (Fragment) OS=Mus musculus OX=10090 GN=Dkc1 PE=1 SV=1;tr|B7ZCL7|B7	4	1	1	1	0	0	1	0	0	6.9	6.9	16.478	145	145;184;260;509	0	5.9383	6.9	0	0	7660900	7660900	0	7660900	0
A0A0U1RPR4;A0A0U1RNN2;A0A0U1RP07;A0A0U1RNG1;Q9CWK3	A0A0U1RPR4;A0A0U1RNN2;A0A0U1RP07;A0A0U1RNG1;Q9CWK3	CD2 antigen cytoplasmic tail-binding protein 2	Cd2bp2	tr|A0A0U1RPR4|A0A0U1RPR4_MOUSE CD2 antigen cytoplasmic tail-binding protein 2 (Fragment) OS=Mus musculus OX=10090 GN=Cd2bp2 PE=1 SV=1;tr|A0A0U1RNN2|A0A0U1RNN2_MOUSE CD2 antigen cytoplasmic tail-binding protein 2 OS=Mus musculus OX=10090 GN=Cd2bp2 PE=1 SV=1	5	1	1	1	0	0	1	0	0	29.2	29.2	5.0797	48	48;79;130;162;342	0	5.9381	29.2	0	0	1673400	1673400	0	1673400	0
Q91ZW3	Q91ZW3	SWI/SNF-related matrix-associated actin-dependent regulator of chromatin subfamily A member 5	Smarca5	sp|Q91ZW3|SMCA5_MOUSE SWI/SNF-related matrix-associated actin-dependent regulator of chromatin subfamily A member 5 OS=Mus musculus OX=10090 GN=Smarca5 PE=1 SV=1	1	1	1	1	0	0	1	0	0	1.4	1.4	121.63	1051	1051	0	5.9378	1.4	0	0	10083000	10083000	0	10083000	0
A0A1B0GT92;Q9Z1E4	A0A1B0GT92;Q9Z1E4	Glycogen [starch] synthase, muscle	Gys1	tr|A0A1B0GT92|A0A1B0GT92_MOUSE Glycogen [starch] synthase OS=Mus musculus OX=10090 GN=Gys1 PE=1 SV=1;sp|Q9Z1E4|GYS1_MOUSE Glycogen [starch] synthase, muscle OS=Mus musculus OX=10090 GN=Gys1 PE=1 SV=2	2	1	1	1	0	0	1	0	0	3.6	3.6	76.623	674	674;738	0	5.9318	3.6	0	0	2997400	2997400	0	2997400	0
P29595	P29595	NEDD8	Nedd8	sp|P29595|NEDD8_MOUSE NEDD8 OS=Mus musculus OX=10090 GN=Nedd8 PE=1 SV=2	1	1	1	0	1	0	0	1	0	19.8	19.8	8.9723	81	81	0	5.9254	0	19.8	0	56408000	0	56408000	0	289830000
A0A668KL90;A2AHJ7;A2AHK0;Q80UP3	A0A668KL90;A2AHJ7;A2AHK0;Q80UP3	Diacylglycerol kinase;Diacylglycerol kinase zeta	Dgkz	tr|A0A668KL90|A0A668KL90_MOUSE Diacylglycerol kinase OS=Mus musculus OX=10090 GN=Dgkz PE=1 SV=1;tr|A2AHJ7|A2AHJ7_MOUSE Diacylglycerol kinase OS=Mus musculus OX=10090 GN=Dgkz PE=1 SV=1;tr|A2AHK0|A2AHK0_MOUSE Diacylglycerol kinase OS=Mus musculus OX=10090 GN	4	1	1	0	1	0	0	1	0	0.9	0.9	104.15	934	934;946;1123;929	0	5.9234	0	0.9	0	5419600	0	5419600	0	27846000
A0A1Y7VKT5;Q8BVV6;P59325	A0A1Y7VKT5;Q8BVV6;P59325	Eukaryotic translation initiation factor 5	Eif5	tr|A0A1Y7VKT5|A0A1Y7VKT5_MOUSE Eukaryotic translation initiation factor 5 (Fragment) OS=Mus musculus OX=10090 GN=Eif5 PE=1 SV=1;tr|Q8BVV6|Q8BVV6_MOUSE Eukaryotic translation initiation factor 5 OS=Mus musculus OX=10090 GN=Eif5 PE=1 SV=1;sp|P59325|IF5_MOUSE	3	1	1	1	0	0	1	0	0	25	25	4.1798	36	36;375;429	0	5.9221	25	0	0	0	0	0	0	0
Q5SUH7;Q5SUH6;Q99KN9	Q5SUH7;Q5SUH6;Q99KN9	Clathrin interactor 1	Clint1	tr|Q5SUH7|Q5SUH7_MOUSE Clathrin interactor 1 OS=Mus musculus OX=10090 GN=Clint1 PE=1 SV=1;tr|Q5SUH6|Q5SUH6_MOUSE Clathrin interactor 1 OS=Mus musculus OX=10090 GN=Clint1 PE=1 SV=1;sp|Q99KN9|EPN4_MOUSE Clathrin interactor 1 OS=Mus musculus OX=10090 GN=Clint	3	1	1	1	0	0	1	0	0	2.4	2.4	67.73	623	623;641;631	0	5.9007	2.4	0	0	3953200	3953200	0	3953200	0
Q922Q8	Q922Q8	Leucine-rich repeat-containing protein 59	Lrrc59	sp|Q922Q8|LRC59_MOUSE Leucine-rich repeat-containing protein 59 OS=Mus musculus OX=10090 GN=Lrrc59 PE=1 SV=1	1	1	1	1	0	0	1	0	0	5.2	5.2	34.877	307	307	0	5.8994	5.2	0	0	17369000	17369000	0	17369000	0
F6TN80;D6RE22;D3Z4B0;Q3UIX4;F6RDI8;E9Q6E5	F6TN80;D6RE22;D3Z4B0;Q3UIX4;F6RDI8;E9Q6E5		Srsf11	tr|F6TN80|F6TN80_MOUSE Serine and arginine-rich-splicing factor 11 (Fragment) OS=Mus musculus OX=10090 GN=Srsf11 PE=1 SV=1;tr|D6RE22|D6RE22_MOUSE Serine and arginine-rich-splicing factor 11 OS=Mus musculus OX=10090 GN=Srsf11 PE=1 SV=1;tr|D3Z4B0|D3Z4B0_MOUS	6	1	1	1	0	0	1	0	0	7.9	7.9	10.925	101	101;112;192;476;500;511	0	5.8949	7.9	0	0	4670300	4670300	0	4670300	0
A0A2I3BPY7;Q9EP71	A0A2I3BPY7;Q9EP71	Ankycorbin	Rai14	tr|A0A2I3BPY7|A0A2I3BPY7_MOUSE Ankycorbin OS=Mus musculus OX=10090 GN=Rai14 PE=1 SV=1;sp|Q9EP71|RAI14_MOUSE Ankycorbin OS=Mus musculus OX=10090 GN=Rai14 PE=1 SV=1	2	1	1	1	0	0	1	0	0	1.7	1.7	105.71	950	950;979	0	5.8934	1.7	0	0	0	0	0	0	0
P63038	P63038	60 kDa heat shock protein, mitochondrial	Hspd1	sp|P63038|CH60_MOUSE 60 kDa heat shock protein, mitochondrial OS=Mus musculus OX=10090 GN=Hspd1 PE=1 SV=1	1	1	1	1	0	0	1	0	0	1.4	1.4	60.955	573	573	0	5.8875	1.4	0	0	2365800	2365800	0	2365800	0
O70479	O70479	BTB/POZ domain-containing adapter for CUL3-mediated RhoA degradation protein 2	Tnfaip1	sp|O70479|BACD2_MOUSE BTB/POZ domain-containing adapter for CUL3-mediated RhoA degradation protein 2 OS=Mus musculus OX=10090 GN=Tnfaip1 PE=2 SV=1	1	1	1	0	1	0	0	1	0	4.7	4.7	36.134	316	316	0	5.885	0	4.7	0	462540000	0	462540000	0	2210300000
A0A1B0GSR5	A0A1B0GSR5			tr|A0A1B0GSR5|A0A1B0GSR5_MOUSE Serine/threonine-protein kinase LMTK3 OS=Mus musculus OX=10090 GN=Lmtk3 PE=1 SV=1	1	1	1	0	1	0	0	1	0	0.7	0.7	153.77	1450	1450	0.0025773	5.8792	0	0.7	0	732780000	0	732780000	0	3765100000
A0A0H2UH17;A0A0G2JDV6;Q80X50	A0A0H2UH17;A0A0G2JDV6;Q80X50	Ubiquitin-associated protein 2-like	Ubap2l	tr|A0A0H2UH17|A0A0H2UH17_MOUSE Ubiquitin-associated protein 2-like OS=Mus musculus OX=10090 GN=Ubap2l PE=1 SV=1;tr|A0A0G2JDV6|A0A0G2JDV6_MOUSE Ubiquitin-associated protein 2-like OS=Mus musculus OX=10090 GN=Ubap2l PE=1 SV=1;sp|Q80X50|UBP2L_MOUSE Ubiquitin-	3	1	1	1	0	0	1	0	0	0.9	0.9	103.94	983	983;1067;1107	0.0025707	5.8773	0.9	0	0	2684600	2684600	0	2684600	0
A0A2R8W6S4;Q9WVE8	A0A2R8W6S4;Q9WVE8	Protein kinase C and casein kinase substrate in neurons protein 2	Pacsin2	tr|A0A2R8W6S4|A0A2R8W6S4_MOUSE Protein kinase C and casein kinase substrate in neurons protein 2 (Fragment) OS=Mus musculus OX=10090 GN=Pacsin2 PE=1 SV=1;sp|Q9WVE8|PACN2_MOUSE Protein kinase C and casein kinase substrate in neurons protein 2 OS=Mus musculu	2	1	1	1	0	0	1	0	0	4	4	31.165	272	272;486	0.0025641	5.8761	4	0	0	4701900	4701900	0	4701900	0
A0A2R8VJN7;A0A2R8W6T4;A0A2R8W6M8;Q8K1N4	A0A2R8VJN7;A0A2R8W6T4;A0A2R8W6M8;Q8K1N4	Spermatogenesis-associated serine-rich protein 2	Spats2	tr|A0A2R8VJN7|A0A2R8VJN7_MOUSE Spermatogenesis-associated serine-rich protein 2 (Fragment) OS=Mus musculus OX=10090 GN=Spats2 PE=1 SV=1;tr|A0A2R8W6T4|A0A2R8W6T4_MOUSE Spermatogenesis-associated serine-rich protein 2 (Fragment) OS=Mus musculus OX=10090 GN=S	4	1	1	1	0	0	1	0	0	9.4	9.4	17.202	160	160;200;255;545	0.0025575	5.8758	9.4	0	0	1755200	1755200	0	1755200	0
E9Q137	E9Q137		Tex264	sp|E9Q137|TX264_MOUSE Testis-expressed protein 264 homolog OS=Mus musculus OX=10090 GN=Tex264 PE=2 SV=1	1	1	1	0	1	0	0	1	0	9.4	9.4	33.589	309	309	0.002551	5.8746	0	9.4	0	220300000	0	220300000	0	1131900000
H9KV07;Q7TNH6	H9KV07;Q7TNH6	Nephrocystin-3	Nphp3	tr|H9KV07|H9KV07_MOUSE Nephrocystin-3 OS=Mus musculus OX=10090 GN=Nphp3 PE=1 SV=2;sp|Q7TNH6|NPHP3_MOUSE Nephrocystin-3 OS=Mus musculus OX=10090 GN=Nphp3 PE=1 SV=2	2	1	1	0	1	0	0	1	0	1.3	1.3	137.54	1205	1205;1325	0.0025445	5.8742	0	1.3	0	18075000	0	18075000	0	92869000
F6R3V4;H3BIX0;H3BL37;O08784	F6R3V4;H3BIX0;H3BL37;O08784	Treacle protein	Tcof1	tr|F6R3V4|F6R3V4_MOUSE Treacle protein OS=Mus musculus OX=10090 GN=Tcof1 PE=1 SV=1;tr|H3BIX0|H3BIX0_MOUSE Treacle protein (Fragment) OS=Mus musculus OX=10090 GN=Tcof1 PE=1 SV=1;tr|H3BL37|H3BL37_MOUSE Treacle protein OS=Mus musculus OX=10090 GN=Tcof1 PE=1 S	4	1	1	1	0	0	1	0	0	1.7	1.7	102.15	1013	1013;1056;1356;1320	0.0025381	5.8741	1.7	0	0	1214300	1214300	0	1214300	0
Q9JIG7	Q9JIG7	Coiled-coil domain-containing protein 22	Ccdc22	sp|Q9JIG7|CCD22_MOUSE Coiled-coil domain-containing protein 22 OS=Mus musculus OX=10090 GN=Ccdc22 PE=1 SV=1	1	1	1	0	1	0	0	1	0	1.4	1.4	70.843	627	627	0.0025316	5.8679	0	1.4	0	202300000	0	202300000	0	1039400000
E9QL87;A0A0A6YXV9;A0A0R4J1R5;E9PVL3;P0DOV1;P0DOV2;Q504N7;Q8BV49	E9QL87;A0A0A6YXV9;A0A0R4J1R5;E9PVL3;P0DOV1;P0DOV2;Q504N7;Q8BV49	Pyrin and HIN domain-containing protein 1-like;Pyrin and HIN domain-containing protein 1	BC094916;Pyhin1	tr|E9QL87|E9QL87_MOUSE Interferon-activated gene 214 OS=Mus musculus OX=10090 GN=Ifi214 PE=3 SV=1;tr|A0A0A6YXV9|A0A0A6YXV9_MOUSE Interferon-activated gene 209 OS=Mus musculus OX=10090 GN=Ifi209 PE=1 SV=1;tr|A0A0R4J1R5|A0A0R4J1R5_MOUSE Interferon-activated	8	1	1	0	1	0	0	1	0	3.3	3.3	23.308	213	213;213;219;393;425;619;393;420	0.0025253	5.8655	0	3.3	0	2075500	0	2075500	0	10664000
E9PUF4;E9Q640;E9PYZ7;Q6NZN0	E9PUF4;E9Q640;E9PYZ7;Q6NZN0	RNA-binding protein 26	Rbm26	tr|E9PUF4|E9PUF4_MOUSE RNA-binding protein 26 OS=Mus musculus OX=10090 GN=Rbm26 PE=1 SV=1;tr|E9Q640|E9Q640_MOUSE RNA-binding protein 26 OS=Mus musculus OX=10090 GN=Rbm26 PE=1 SV=1;tr|E9PYZ7|E9PYZ7_MOUSE RNA-binding protein 26 OS=Mus musculus OX=10090 GN=Rb	4	1	1	1	0	0	1	0	0	1.5	1.5	111.01	983	983;1001;1009;1012	0.0025189	5.8604	1.5	0	0	3429200	3429200	0	3429200	0
A0A0R4J1L8;F6R307;F6RT60;A0A0R4J023;Q9JLZ3	A0A0R4J1L8;F6R307;F6RT60;A0A0R4J023;Q9JLZ3	Methylglutaconyl-CoA hydratase, mitochondrial	Auh	tr|A0A0R4J1L8|A0A0R4J1L8_MOUSE Methylglutaconyl-CoA hydratase, mitochondrial OS=Mus musculus OX=10090 GN=Auh PE=1 SV=1;tr|F6R307|F6R307_MOUSE Methylglutaconyl-CoA hydratase, mitochondrial (Fragment) OS=Mus musculus OX=10090 GN=Auh PE=1 SV=1;tr|F6RT60|F6RT6	5	1	1	1	0	0	1	0	0	11.1	11.1	15.451	144	144;219;239;314;314	0.0025126	5.8591	11.1	0	0	3024000	3024000	0	3024000	0
A0A1B0GRU8;A0A6Q6PUT5;Q9R1C7	A0A1B0GRU8;A0A6Q6PUT5;Q9R1C7	Pre-mRNA-processing factor 40 homolog A	Prpf40a	tr|A0A1B0GRU8|A0A1B0GRU8_MOUSE Pre-mRNA-processing factor 40 homolog A OS=Mus musculus OX=10090 GN=Prpf40a PE=1 SV=1;tr|A0A6Q6PUT5|A0A6Q6PUT5_MOUSE Pre-mRNA-processing factor 40 homolog A (Fragment) OS=Mus musculus OX=10090 GN=Prpf40a PE=1 SV=1;sp|Q9R1C7|P	3	1	1	1	0	0	1	0	0	1.7	1.7	105.53	926	926;966;953	0.0025063	5.8567	1.7	0	0	15723000	15723000	0	15723000	0
Q78YY6	Q78YY6	DnaJ homolog subfamily C member 15	Dnajc15	sp|Q78YY6|DJC15_MOUSE DnaJ homolog subfamily C member 15 OS=Mus musculus OX=10090 GN=Dnajc15 PE=1 SV=1	1	1	1	1	0	0	1	0	0	9.4	9.4	15.953	149	149	0.0025	5.8552	9.4	0	0	4300200	4300200	0	4300200	0
O88271	O88271	Craniofacial development protein 1	Cfdp1	sp|O88271|CFDP1_MOUSE Craniofacial development protein 1 OS=Mus musculus OX=10090 GN=Cfdp1 PE=1 SV=1	1	1	1	1	0	0	1	0	0	3.4	3.4	32.921	295	295	0.0024938	5.8535	3.4	0	0	26860000	26860000	0	26860000	0
Q9D6J6	Q9D6J6	NADH dehydrogenase [ubiquinone] flavoprotein 2, mitochondrial	Ndufv2	sp|Q9D6J6|NDUV2_MOUSE NADH dehydrogenase [ubiquinone] flavoprotein 2, mitochondrial OS=Mus musculus OX=10090 GN=Ndufv2 PE=1 SV=2	1	1	1	1	0	0	1	0	0	5.2	5.2	27.285	248	248	0.0024876	5.8472	5.2	0	0	3542600	3542600	0	3542600	0
A0A0R4J0Q5;P21619	A0A0R4J0Q5;P21619	Lamin-B2	Lmnb2	tr|A0A0R4J0Q5|A0A0R4J0Q5_MOUSE Lamin-B2 OS=Mus musculus OX=10090 GN=Lmnb2 PE=1 SV=1;sp|P21619|LMNB2_MOUSE Lamin-B2 OS=Mus musculus OX=10090 GN=Lmnb2 PE=1 SV=2	2	1	1	1	0	0	1	0	0	2.3	2.3	69.084	615	615;596	0.0024814	5.8471	2.3	0	0	2640400	2640400	0	2640400	0
P01027	P01027	Complement C3;Complement C3 beta chain;C3-beta-c;Complement C3 alpha chain;C3a anaphylatoxin;Acylation stimulating protein;Complement C3b alpha chain;Complement C3c alpha chain fragment 1;Complement C3dg fragment;Complement C3g fragment;Complement C3d fragment;Complement C3f fragment;Complement C3c alpha chain fragment 2	C3	sp|P01027|CO3_MOUSE Complement C3 OS=Mus musculus OX=10090 GN=C3 PE=1 SV=3	1	1	1	1	0	0	1	0	0	0.8	0.8	186.48	1663	1663	0.0024691	5.8458	0.8	0	0	2594500	2594500	0	2594500	0
F7CZD1;F6TXD3;Q9Z1J3	F7CZD1;F6TXD3;Q9Z1J3	Cysteine desulfurase, mitochondrial	Gm28036;Nfs1	tr|F7CZD1|F7CZD1_MOUSE Cysteine desulfurase (Fragment) OS=Mus musculus OX=10090 GN=Gm28036 PE=4 SV=1;tr|F6TXD3|F6TXD3_MOUSE Cysteine desulfurase (Fragment) OS=Mus musculus OX=10090 GN=Gm28036 PE=4 SV=1;sp|Q9Z1J3|NFS1_MOUSE Cysteine desulfurase, mitochondri	3	1	1	1	0	0	1	0	0	8.5	8.5	18.052	164	164;174;459	0.0024752	5.8458	8.5	0	0	2192600	2192600	0	2192600	0
V9GXM7;V9GXE0;Q61884	V9GXM7;V9GXE0;Q61884	Meiosis-specific nuclear structural protein 1	Mns1	tr|V9GXM7|V9GXM7_MOUSE Meiosis-specific nuclear structural protein 1 (Fragment) OS=Mus musculus OX=10090 GN=Mns1 PE=1 SV=1;tr|V9GXE0|V9GXE0_MOUSE Meiosis-specific nuclear structural protein 1 (Fragment) OS=Mus musculus OX=10090 GN=Mns1 PE=1 SV=1;sp|Q61884|	3	1	1	0	1	0	0	1	0	3.4	3.4	24.899	206	206;219;491	0.0024631	5.8441	0	3.4	0	237440000	0	237440000	0	1220000000
D3YYV8;P47962	D3YYV8;P47962	60S ribosomal protein L5	Rpl5	tr|D3YYV8|D3YYV8_MOUSE 60S ribosomal protein L5 (Fragment) OS=Mus musculus OX=10090 GN=Rpl5 PE=1 SV=1;sp|P47962|RL5_MOUSE 60S ribosomal protein L5 OS=Mus musculus OX=10090 GN=Rpl5 PE=1 SV=3	2	1	1	1	0	0	1	0	0	8.6	8.6	17.997	163	163;297	0.002457	5.8439	8.6	0	0	10723000	10723000	0	10723000	0
Q5EBP8;P49312	Q5EBP8;P49312	Heterogeneous nuclear ribonucleoprotein A1;Heterogeneous nuclear ribonucleoprotein A1, N-terminally processed	Hnrnpa1	tr|Q5EBP8|Q5EBP8_MOUSE Heterogeneous nuclear ribonucleoprotein A1 OS=Mus musculus OX=10090 GN=Hnrnpa1 PE=1 SV=1;sp|P49312|ROA1_MOUSE Heterogeneous nuclear ribonucleoprotein A1 OS=Mus musculus OX=10090 GN=Hnrnpa1 PE=1 SV=2	2	1	1	1	0	0	1	0	0	4.6	4.6	38.833	373	373;320	0.002451	5.8435	4.6	0	0	5692500	5692500	0	5692500	0
D3Z3S1;Q9WUQ2	D3Z3S1;Q9WUQ2	Prolactin regulatory element-binding protein	Preb	tr|D3Z3S1|D3Z3S1_MOUSE Prolactin regulatory element-binding protein OS=Mus musculus OX=10090 GN=Preb PE=1 SV=1;sp|Q9WUQ2|PREB_MOUSE Prolactin regulatory element-binding protein OS=Mus musculus OX=10090 GN=Preb PE=1 SV=1	2	1	1	1	0	0	1	0	0	4	4	37.965	350	350;417	0.002439	5.8429	4	0	0	6523900	6523900	0	6523900	0
F7AI27;D3Z030;Q6EDY6	F7AI27;D3Z030;Q6EDY6	Leucine-rich repeat-containing protein 16A	Lrrc16a	tr|F7AI27|F7AI27_MOUSE F-actin-uncapping protein LRRC16A (Fragment) OS=Mus musculus OX=10090 GN=Carmil1 PE=1 SV=1;tr|D3Z030|D3Z030_MOUSE F-actin-uncapping protein LRRC16A OS=Mus musculus OX=10090 GN=Carmil1 PE=1 SV=2;sp|Q6EDY6|CARL1_MOUSE F-actin-uncapping	3	1	1	1	0	0	1	0	0	1.5	1.5	102.6	932	932;1332;1374	0.0024331	5.8424	1.5	0	0	5661100	5661100	0	5661100	0
Q3UGI9;Q3UD93;Q3U7U3	Q3UGI9;Q3UD93;Q3U7U3	F-box only protein 7	Fbxo7	tr|Q3UGI9|Q3UGI9_MOUSE F-box only protein 7 OS=Mus musculus OX=10090 GN=Fbxo7 PE=1 SV=1;tr|Q3UD93|Q3UD93_MOUSE F-box only protein 7 OS=Mus musculus OX=10090 GN=Fbxo7 PE=1 SV=1;sp|Q3U7U3|FBX7_MOUSE F-box only protein 7 OS=Mus musculus OX=10090 GN=Fbxo7 PE=1	3	1	1	0	1	0	0	1	0	3.4	3.4	48.727	442	442;444;523	0.0024272	5.835	0	3.4	0	1355200	0	1355200	0	6963400
Q0ZCJ7	Q0ZCJ7	MEF2-activating motif and SAP domain-containing transcriptional regulator	Mamstr	sp|Q0ZCJ7|MASTR_MOUSE MEF2-activating motif and SAP domain-containing transcriptional regulator OS=Mus musculus OX=10090 GN=Mamstr PE=1 SV=2	1	1	1	0	1	0	0	1	0	4	4	45.402	421	421	0.0024213	5.8335	0	4	0	8822700	0	8822700	0	45332000
A0A571BGD8;A6H644;Q8BG95	A0A571BGD8;A6H644;Q8BG95	Protein phosphatase 1 regulatory subunit;Protein phosphatase 1 regulatory subunit 12B	Ppp1r12b	tr|A0A571BGD8|A0A571BGD8_MOUSE Protein phosphatase 1 regulatory subunit 12B OS=Mus musculus OX=10090 GN=Ppp1r12b PE=1 SV=1;tr|A6H644|A6H644_MOUSE Protein phosphatase 1 regulatory subunit OS=Mus musculus OX=10090 GN=Ppp1r12b PE=1 SV=1;sp|Q8BG95|MYPT2_MOUSE	3	1	1	1	0	0	1	0	0	4.8	4.8	21.34	186	186;992;976	0.0024155	5.8285	4.8	0	0	2612100	2612100	0	2612100	0
Q922H2	Q922H2	[Pyruvate dehydrogenase (acetyl-transferring)] kinase isozyme 3, mitochondrial	Pdk3	sp|Q922H2|PDK3_MOUSE [Pyruvate dehydrogenase (acetyl-transferring)] kinase isozyme 3, mitochondrial OS=Mus musculus OX=10090 GN=Pdk3 PE=1 SV=1	1	1	1	1	0	0	1	0	0	2.7	2.7	47.922	415	415	0.0024096	5.8214	2.7	0	0	1176900	1176900	0	1176900	0
D3Z473	D3Z473		Nr3c2	tr|D3Z473|D3Z473_MOUSE Mineralocorticoid receptor OS=Mus musculus OX=10090 GN=Nr3c2 PE=1 SV=1	1	1	1	0	1	0	0	1	0	1.4	1.4	94.371	867	867	0.0024038	5.8184	0	1.4	0	759690	0	759690	0	3903300
Q8JZU2	Q8JZU2	Tricarboxylate transport protein, mitochondrial	Slc25a1	sp|Q8JZU2|TXTP_MOUSE Tricarboxylate transport protein, mitochondrial OS=Mus musculus OX=10090 GN=Slc25a1 PE=1 SV=1	1	1	1	1	0	0	1	0	0	2.9	2.9	33.931	311	311	0.0023981	5.8169	2.9	0	0	1995100	1995100	0	1995100	0
Q3UQ44	Q3UQ44	Ras GTPase-activating-like protein IQGAP2	Iqgap2	sp|Q3UQ44|IQGA2_MOUSE Ras GTPase-activating-like protein IQGAP2 OS=Mus musculus OX=10090 GN=Iqgap2 PE=1 SV=2	1	1	1	1	0	0	1	0	0	0.8	0.8	180.53	1575	1575	0.0023923	5.8164	0.8	0	0	1748300	1748300	0	1748300	0
Q8R2Y2	Q8R2Y2	Cell surface glycoprotein MUC18	Mcam	sp|Q8R2Y2|MUC18_MOUSE Cell surface glycoprotein MUC18 OS=Mus musculus OX=10090 GN=Mcam PE=1 SV=1	1	1	1	0	1	0	0	1	0	2.2	2.2	71.545	648	648	0.0023866	5.8159	0	2.2	0	0	0	0	0	0
A2AFJ8;F6WMJ3;Q8K4I3	A2AFJ8;F6WMJ3;Q8K4I3	Rho guanine nucleotide exchange factor 6	Arhgef6	tr|A2AFJ8|A2AFJ8_MOUSE Rho guanine nucleotide exchange factor 6 OS=Mus musculus OX=10090 GN=Arhgef6 PE=1 SV=1;tr|F6WMJ3|F6WMJ3_MOUSE Rho guanine nucleotide exchange factor 6 OS=Mus musculus OX=10090 GN=Arhgef6 PE=1 SV=1;sp|Q8K4I3|ARHG6_MOUSE Rho guanine nu	3	1	1	1	0	0	1	0	0	2.9	2.9	55.13	483	483;795;771	0.002381	5.8136	2.9	0	0	5902100	5902100	0	5902100	0
O70172	O70172	Phosphatidylinositol 5-phosphate 4-kinase type-2 alpha	Pip4k2a	sp|O70172|PI42A_MOUSE Phosphatidylinositol 5-phosphate 4-kinase type-2 alpha OS=Mus musculus OX=10090 GN=Pip4k2a PE=1 SV=1	1	1	1	1	0	0	1	0	0	2.2	2.2	46.151	405	405	0.0023753	5.8116	2.2	0	0	20819000	20819000	0	20819000	0
Q64378	Q64378	Peptidyl-prolyl cis-trans isomerase FKBP5;Peptidyl-prolyl cis-trans isomerase FKBP5, N-terminally processed	Fkbp5	sp|Q64378|FKBP5_MOUSE Peptidyl-prolyl cis-trans isomerase FKBP5 OS=Mus musculus OX=10090 GN=Fkbp5 PE=1 SV=1	1	1	1	1	0	0	1	0	0	4.4	4.4	50.966	456	456	0.0023697	5.8102	4.4	0	0	6794100	6794100	0	6794100	0
A0A494BB84;Q3U4F0;Q91V61	A0A494BB84;Q3U4F0;Q91V61	Sideroflexin-3	Sfxn3	tr|A0A494BB84|A0A494BB84_MOUSE Sideroflexin-3 (Fragment) OS=Mus musculus OX=10090 GN=Sfxn3 PE=1 SV=1;tr|Q3U4F0|Q3U4F0_MOUSE Sideroflexin-3 OS=Mus musculus OX=10090 GN=Sfxn3 PE=1 SV=1;sp|Q91V61|SFXN3_MOUSE Sideroflexin-3 OS=Mus musculus OX=10090 GN=Sfxn3 PE	3	1	1	1	0	0	1	0	0	8.2	8.2	12.494	110	110;281;321	0.0023641	5.8088	8.2	0	0	4554700	4554700	0	4554700	0
Q9CQC7	Q9CQC7	NADH dehydrogenase [ubiquinone] 1 beta subcomplex subunit 4	Ndufb4	sp|Q9CQC7|NDUB4_MOUSE NADH dehydrogenase [ubiquinone] 1 beta subcomplex subunit 4 OS=Mus musculus OX=10090 GN=Ndufb4 PE=1 SV=3	1	1	1	1	0	0	1	0	0	8.5	8.5	15.081	129	129	0.0023585	5.8069	8.5	0	0	3350000	3350000	0	3350000	0
G3X9K4;A0A5F8MQ25;Q8R3Q2	G3X9K4;A0A5F8MQ25;Q8R3Q2	Serine/threonine-protein phosphatase 6 regulatory subunit 2	Ppp6r2	tr|G3X9K4|G3X9K4_MOUSE Serine/threonine-protein phosphatase 6 regulatory subunit 2 OS=Mus musculus OX=10090 GN=Ppp6r2 PE=1 SV=1;tr|A0A5F8MQ25|A0A5F8MQ25_MOUSE Serine/threonine-protein phosphatase 6 regulatory subunit 2 OS=Mus musculus OX=10090 GN=Ppp6r2 PE	3	1	1	0	1	0	0	1	0	1	1	100.46	923	923;950;923	0.0023529	5.803	0	1	0	14449000	0	14449000	0	74240000
Q8C788;Q91ZR2	Q8C788;Q91ZR2	Sorting nexin;Sorting nexin-18	Snx18	tr|Q8C788|Q8C788_MOUSE Sorting nexin OS=Mus musculus OX=10090 GN=Snx18 PE=1 SV=1;sp|Q91ZR2|SNX18_MOUSE Sorting nexin-18 OS=Mus musculus OX=10090 GN=Snx18 PE=1 SV=1	2	1	1	1	0	0	1	0	0	2.6	2.6	67.789	615	615;614	0.0023474	5.7993	2.6	0	0	7521600	7521600	0	7521600	0
F6Q609;E9Q133;Q3U0I3;P80318	F6Q609;E9Q133;Q3U0I3;P80318	T-complex protein 1 subunit gamma	Cct3	tr|F6Q609|F6Q609_MOUSE T-complex protein 1 subunit gamma (Fragment) OS=Mus musculus OX=10090 GN=Cct3 PE=1 SV=8;tr|E9Q133|E9Q133_MOUSE T-complex protein 1 subunit gamma OS=Mus musculus OX=10090 GN=Cct3 PE=1 SV=1;tr|Q3U0I3|Q3U0I3_MOUSE T-complex protein 1 su	4	1	1	1	0	0	1	0	0	3.9	3.9	34.162	306	306;507;521;545	0.0023419	5.7981	3.9	0	0	4870000	4870000	0	4870000	0
P45952	P45952	Medium-chain specific acyl-CoA dehydrogenase, mitochondrial	Acadm	sp|P45952|ACADM_MOUSE Medium-chain specific acyl-CoA dehydrogenase, mitochondrial OS=Mus musculus OX=10090 GN=Acadm PE=1 SV=1	1	1	1	1	0	0	1	0	0	2.9	2.9	46.481	421	421	0.0023364	5.7976	2.9	0	0	5549400	5549400	0	5549400	0
Q8VDC1	Q8VDC1	FYVE and coiled-coil domain-containing protein 1	Fyco1	sp|Q8VDC1|FYCO1_MOUSE FYVE and coiled-coil domain-containing protein 1 OS=Mus musculus OX=10090 GN=Fyco1 PE=1 SV=1	1	1	1	0	1	0	0	1	0	0.5	0.5	162.33	1437	1437	0.002331	5.7971	0	0.5	0	2359600	0	2359600	0	12124000
A0A0U1RQ71;Q921R2;P62301	A0A0U1RQ71;Q921R2;P62301	40S ribosomal protein S13	Rps13	tr|A0A0U1RQ71|A0A0U1RQ71_MOUSE 40S ribosomal protein S13 OS=Mus musculus OX=10090 GN=Rps13 PE=1 SV=1;tr|Q921R2|Q921R2_MOUSE 40S ribosomal protein S13 OS=Mus musculus OX=10090 GN=Rps13 PE=1 SV=1;sp|P62301|RS13_MOUSE 40S ribosomal protein S13 OS=Mus musculus	3	1	1	1	0	0	1	0	0	22.6	22.6	5.8728	53	53;140;151	0.0023256	5.7967	22.6	0	0	25193000	25193000	0	25193000	0
D3YTQ9;P62843	D3YTQ9;P62843	40S ribosomal protein S15	Rps15	tr|D3YTQ9|D3YTQ9_MOUSE 40S ribosomal protein S15 OS=Mus musculus OX=10090 GN=Rps15 PE=1 SV=1;sp|P62843|RS15_MOUSE 40S ribosomal protein S15 OS=Mus musculus OX=10090 GN=Rps15 PE=1 SV=2	2	1	1	1	0	0	1	0	0	11	11	13.742	118	118;145	0.0023202	5.7946	11	0	0	23114000	23114000	0	23114000	0
A0A1Y7VNC5;Q61043	A0A1Y7VNC5;Q61043	Ninein	Nin	tr|A0A1Y7VNC5|A0A1Y7VNC5_MOUSE Ninein OS=Mus musculus OX=10090 GN=Nin PE=1 SV=1;sp|Q61043|NIN_MOUSE Ninein OS=Mus musculus OX=10090 GN=Nin PE=1 SV=4	2	1	1	0	1	0	0	1	0	0.7	0.7	227.67	1979	1979;2113	0.0023148	5.7848	0	0.7	0	37878000	0	37878000	0	194620000
Q922U1	Q922U1	U4/U6 small nuclear ribonucleoprotein Prp3	Prpf3	sp|Q922U1|PRPF3_MOUSE U4/U6 small nuclear ribonucleoprotein Prp3 OS=Mus musculus OX=10090 GN=Prpf3 PE=1 SV=1	1	1	1	1	0	0	1	0	0	2	2	77.454	683	683	0.0023095	5.7841	2	0	0	1439800	1439800	0	1439800	0
P14148	P14148	60S ribosomal protein L7	Rpl7	sp|P14148|RL7_MOUSE 60S ribosomal protein L7 OS=Mus musculus OX=10090 GN=Rpl7 PE=1 SV=2	1	1	1	1	0	0	1	0	0	7	7	31.419	270	270	0.0023041	5.7796	7	0	0	622430	622430	0	622430	0
B2KGR2;O89112	B2KGR2;O89112	LanC-like protein 1	Lancl1	tr|B2KGR2|B2KGR2_MOUSE Glutathione S-transferase LANCL1 (Fragment) OS=Mus musculus OX=10090 GN=Lancl1 PE=1 SV=1;sp|O89112|LANC1_MOUSE Glutathione S-transferase LANCL1 OS=Mus musculus OX=10090 GN=Lancl1 PE=1 SV=1	2	1	1	1	0	0	1	0	0	6.9	6.9	19.656	173	173;399	0.0022989	5.7787	6.9	0	0	2861600	2861600	0	2861600	0
Q149L0	Q149L0		Dhrs2	tr|Q149L0|Q149L0_MOUSE Dehydrogenase/reductase member 2 OS=Mus musculus OX=10090 GN=Dhrs2 PE=1 SV=1	1	1	1	0	1	0	0	1	0	5.3	5.3	30.056	282	282	0.0022936	5.7781	0	5.3	0	29801000	0	29801000	0	153120000
G3UZA0;Q8BGA5	G3UZA0;Q8BGA5	KRR1 small subunit processome component homolog	Krr1	tr|G3UZA0|G3UZA0_MOUSE KRR1 small subunit processome component OS=Mus musculus OX=10090 GN=Krr1 PE=1 SV=1;sp|Q8BGA5|KRR1_MOUSE KRR1 small subunit processome component homolog OS=Mus musculus OX=10090 GN=Krr1 PE=2 SV=1	2	1	1	0	1	0	0	1	0	2.2	2.2	36.66	323	323;380	0.0022883	5.776	0	2.2	0	35734000	0	35734000	0	183600000
B1AU25;Q9Z0X1	B1AU25;Q9Z0X1	Apoptosis-inducing factor 1, mitochondrial	Aifm1	tr|B1AU25|B1AU25_MOUSE Apoptosis-inducing factor 1, mitochondrial OS=Mus musculus OX=10090 GN=Aifm1 PE=1 SV=1;sp|Q9Z0X1|AIFM1_MOUSE Apoptosis-inducing factor 1, mitochondrial OS=Mus musculus OX=10090 GN=Aifm1 PE=1 SV=1	2	1	1	1	0	0	1	0	0	3.5	3.5	66.113	608	608;612	0.0022831	5.7723	3.5	0	0	15233000	15233000	0	15233000	0
A2AW05;Q08943	A2AW05;Q08943	FACT complex subunit SSRP1	Ssrp1	tr|A2AW05|A2AW05_MOUSE FACT complex subunit SSRP1 (Fragment) OS=Mus musculus OX=10090 GN=Ssrp1 PE=1 SV=1;sp|Q08943|SSRP1_MOUSE FACT complex subunit SSRP1 OS=Mus musculus OX=10090 GN=Ssrp1 PE=1 SV=2	2	1	1	1	0	0	1	0	0	1.4	1.4	71.527	623	623;708	0.0022727	5.772	1.4	0	0	3181900	3181900	0	3181900	0
A0A0A6YXI9;Q6NZF1	A0A0A6YXI9;Q6NZF1	Zinc finger CCCH domain-containing protein 11A	Zc3h11a	tr|A0A0A6YXI9|A0A0A6YXI9_MOUSE Zinc finger CCCH domain-containing protein 11A (Fragment) OS=Mus musculus OX=10090 GN=Zc3h11a PE=1 SV=1;sp|Q6NZF1|ZC11A_MOUSE Zinc finger CCCH domain-containing protein 11A OS=Mus musculus OX=10090 GN=Zc3h11a PE=1 SV=1	2	1	1	1	0	0	1	0	0	4.6	4.6	20.851	194	194;792	0.0022779	5.772	4.6	0	0	2100200	2100200	0	2100200	0
Q8VEH6	Q8VEH6	COBW domain-containing protein 1	Cbwd1	sp|Q8VEH6|CBWD1_MOUSE COBW domain-containing protein 1 OS=Mus musculus OX=10090 GN=Cbwd1 PE=1 SV=1	1	1	1	0	1	0	0	1	0	1.8	1.8	43.771	393	393	0.0022624	5.7714	0	1.8	0	26443000	0	26443000	0	135870000
D3Z7J3;Q9DCW2	D3Z7J3;Q9DCW2	Phospholipid scramblase 2	Plscr2	tr|D3Z7J3|D3Z7J3_MOUSE Phospholipid scramblase OS=Mus musculus OX=10090 GN=Plscr2 PE=1 SV=1;sp|Q9DCW2|PLS2_MOUSE Phospholipid scramblase 2 OS=Mus musculus OX=10090 GN=Plscr2 PE=1 SV=3	2	1	1	0	1	0	0	1	0	7.6	7.6	19.295	172	172;307	0.0022676	5.7714	0	7.6	0	9341400	0	9341400	0	47997000
A0A0R4J0V5;P08775	A0A0R4J0V5;P08775	DNA-directed RNA polymerase II subunit RPB1	Polr2a	tr|A0A0R4J0V5|A0A0R4J0V5_MOUSE DNA-directed RNA polymerase subunit OS=Mus musculus OX=10090 GN=Polr2a PE=1 SV=1;sp|P08775|RPB1_MOUSE DNA-directed RNA polymerase II subunit RPB1 OS=Mus musculus OX=10090 GN=Polr2a PE=1 SV=3	2	1	1	1	0	0	1	0	0	0.4	0.4	213.48	1932	1932;1970	0.0022573	5.7711	0.4	0	0	536650	536650	0	536650	0
A0A1W2P6N7;Q3UID0;Q6PDG5	A0A1W2P6N7;Q3UID0;Q6PDG5	SWI/SNF complex subunit SMARCC2	Smarcc2	tr|A0A1W2P6N7|A0A1W2P6N7_MOUSE SWI/SNF complex subunit SMARCC2 OS=Mus musculus OX=10090 GN=Smarcc2 PE=1 SV=1;tr|Q3UID0|Q3UID0_MOUSE SWI/SNF complex subunit SMARCC2 OS=Mus musculus OX=10090 GN=Smarcc2 PE=1 SV=1;sp|Q6PDG5|SMRC2_MOUSE SWI/SNF complex subunit	3	1	1	1	0	0	1	0	0	10.6	10.6	16.341	142	142;1130;1213	0.0022523	5.7692	10.6	0	0	0	0	0	0	0
A0A0R4J0H7;Q8K2Z4	A0A0R4J0H7;Q8K2Z4	Condensin complex subunit 1	Ncapd2	tr|A0A0R4J0H7|A0A0R4J0H7_MOUSE Condensin complex subunit 1 OS=Mus musculus OX=10090 GN=Ncapd2 PE=1 SV=1;sp|Q8K2Z4|CND1_MOUSE Condensin complex subunit 1 OS=Mus musculus OX=10090 GN=Ncapd2 PE=1 SV=2	2	1	1	0	1	0	0	1	0	1.1	1.1	155.59	1392	1392;1392	0.0022472	5.7668	0	1.1	0	22515000	0	22515000	0	115680000
D3Z1Y7;Q8BW24;F6Z595;Q3LR78	D3Z1Y7;Q8BW24;F6Z595;Q3LR78		Zbtb38	tr|D3Z1Y7|D3Z1Y7_MOUSE Zinc finger and BTB domain-containing 38 (Fragment) OS=Mus musculus OX=10090 GN=Zbtb38 PE=1 SV=1;tr|Q8BW24|Q8BW24_MOUSE Zinc finger and BTB domain-containing 38 (Fragment) OS=Mus musculus OX=10090 GN=Zbtb38 PE=1 SV=1;tr|F6Z595|F6Z595	4	1	1	0	1	0	0	1	0	6.5	6.5	20.675	184	184;544;924;1197	0.0022422	5.765	0	6.5	0	27190000	0	27190000	0	139700000
Q9CQM8;O09167	Q9CQM8;O09167	60S ribosomal protein L21	Rpl21	tr|Q9CQM8|Q9CQM8_MOUSE 60S ribosomal protein L21 OS=Mus musculus OX=10090 GN=Rpl21 PE=1 SV=1;sp|O09167|RL21_MOUSE 60S ribosomal protein L21 OS=Mus musculus OX=10090 GN=Rpl21 PE=1 SV=3	2	1	1	1	0	0	1	0	0	6.9	6.9	18.579	160	160;160	0.0022371	5.7637	6.9	0	0	0	0	0	0	0
Q9QY01	Q9QY01	Serine/threonine-protein kinase ULK2	Ulk2	sp|Q9QY01|ULK2_MOUSE Serine/threonine-protein kinase ULK2 OS=Mus musculus OX=10090 GN=Ulk2 PE=1 SV=1	1	1	1	0	1	0	0	1	0	0.8	0.8	112.88	1037	1037	0.0022321	5.7634	0	0.8	0	41806000	0	41806000	0	214810000
O55029	O55029	Coatomer subunit beta	Copb2	sp|O55029|COPB2_MOUSE Coatomer subunit beta OS=Mus musculus OX=10090 GN=Copb2 PE=1 SV=2	1	1	1	1	0	0	1	0	0	2.2	2.2	102.45	905	905	0.0022272	5.7622	2.2	0	0	6234400	6234400	0	6234400	0
E9QP46;Q6ZWQ0	E9QP46;Q6ZWQ0	Nesprin-2	Syne2	tr|E9QP46|E9QP46_MOUSE Nesprin-2 OS=Mus musculus OX=10090 GN=Syne2 PE=1 SV=1;sp|Q6ZWQ0|SYNE2_MOUSE Nesprin-2 OS=Mus musculus OX=10090 GN=Syne2 PE=1 SV=2	2	1	1	1	0	0	1	0	0	0.2	0.2	782.13	6870	6870;6874	0.0022222	5.7583	0.2	0	0	1051800	1051800	0	1051800	0
B7ZNU9;Q61235	B7ZNU9;Q61235	Beta-2-syntrophin	Sntb2	tr|B7ZNU9|B7ZNU9_MOUSE Beta-2-syntrophin OS=Mus musculus OX=10090 GN=Sntb2 PE=1 SV=1;sp|Q61235|SNTB2_MOUSE Beta-2-syntrophin OS=Mus musculus OX=10090 GN=Sntb2 PE=1 SV=2	2	1	1	1	0	0	1	0	0	2.4	2.4	57.427	531	531;520	0.0022173	5.7502	2.4	0	0	13381000	13381000	0	13381000	0
P14733	P14733	Lamin-B1	Lmnb1	sp|P14733|LMNB1_MOUSE Lamin-B1 OS=Mus musculus OX=10090 GN=Lmnb1 PE=1 SV=3	1	1	1	1	0	0	1	0	0	2	2	66.785	588	588	0.0022124	5.749	2	0	0	3108500	3108500	0	3108500	0
Q80TJ7;Q9WTU0	Q80TJ7;Q9WTU0	Histone lysine demethylase PHF8;Lysine-specific demethylase PHF2	Phf8;Phf2	sp|Q80TJ7|PHF8_MOUSE Histone lysine demethylase PHF8 OS=Mus musculus OX=10090 GN=Phf8 PE=1 SV=2;sp|Q9WTU0|PHF2_MOUSE Lysine-specific demethylase PHF2 OS=Mus musculus OX=10090 GN=Phf2 PE=1 SV=2	2	1	1	1	0	0	1	0	0	1.4	1.4	113.55	1023	1023;1096	0.0022075	5.7484	1.4	0	0	4221700	4221700	0	4221700	0
A0A0N4SW95;Q6B966	A0A0N4SW95;Q6B966	NACHT, LRR and PYD domains-containing protein 14	Nlrp14	tr|A0A0N4SW95|A0A0N4SW95_MOUSE NACHT, LRR and PYD domains-containing protein 14 OS=Mus musculus OX=10090 GN=Nlrp14 PE=1 SV=1;sp|Q6B966|NAL14_MOUSE NACHT, LRR and PYD domains-containing protein 14 OS=Mus musculus OX=10090 GN=Nlrp14 PE=1 SV=2	2	1	1	0	1	0	0	1	0	2.4	2.4	36.757	334	334;993	0.0022026	5.7471	0	2.4	0	5128900	0	5128900	0	26353000
Q91VD9	Q91VD9	NADH-ubiquinone oxidoreductase 75 kDa subunit, mitochondrial	Ndufs1	sp|Q91VD9|NDUS1_MOUSE NADH-ubiquinone oxidoreductase 75 kDa subunit, mitochondrial OS=Mus musculus OX=10090 GN=Ndufs1 PE=1 SV=2	1	1	1	1	0	0	1	0	0	1.1	1.1	79.776	727	727	0.0021978	5.7435	1.1	0	0	2047000	2047000	0	2047000	0
Q673U1	Q673U1	Heparan sulfate glucosamine 3-O-sulfotransferase 2	Hs3st2	sp|Q673U1|HS3S2_MOUSE Heparan sulfate glucosamine 3-O-sulfotransferase 2 OS=Mus musculus OX=10090 GN=Hs3st2 PE=2 SV=2	1	1	1	0	1	0	0	1	0	1.9	1.9	41.377	367	367	0.002193	5.7401	0	1.9	0	128100000	0	128100000	0	658190000
Q3TU25;Q3U741;Q501J6	Q3TU25;Q3U741;Q501J6	Probable ATP-dependent RNA helicase DDX17	Ddx17	tr|Q3TU25|Q3TU25_MOUSE RNA helicase OS=Mus musculus OX=10090 GN=Ddx17 PE=1 SV=1;tr|Q3U741|Q3U741_MOUSE RNA helicase OS=Mus musculus OX=10090 GN=Ddx17 PE=1 SV=1;sp|Q501J6|DDX17_MOUSE Probable ATP-dependent RNA helicase DDX17 OS=Mus musculus OX=10090 GN=Ddx1	3	3	1	3	0	0	1	0	0	6.2	3.6	47.385	418	418;652;650	0.0021882	5.7396	6.2	0	0	1202400	1202400	0	1202400	0
B7ZC27;Q99PV0	B7ZC27;Q99PV0	Pre-mRNA-processing-splicing factor 8	Prpf8	tr|B7ZC27|B7ZC27_MOUSE Pre-mRNA-processing-splicing factor 8 (Fragment) OS=Mus musculus OX=10090 GN=Prpf8 PE=1 SV=1;sp|Q99PV0|PRP8_MOUSE Pre-mRNA-processing-splicing factor 8 OS=Mus musculus OX=10090 GN=Prpf8 PE=1 SV=2	2	1	1	1	0	0	1	0	0	2	2	123.55	1044	1044;2335	0.0021834	5.7392	2	0	0	6879000	6879000	0	6879000	0
Q04447	Q04447	Creatine kinase B-type	Ckb	sp|Q04447|KCRB_MOUSE Creatine kinase B-type OS=Mus musculus OX=10090 GN=Ckb PE=1 SV=1	1	1	1	1	0	0	1	0	0	4.2	4.2	42.713	381	381	0.0021786	5.7383	4.2	0	0	3037000	3037000	0	3037000	0
F7DF62;J3QNU6;Q8BWG8	F7DF62;J3QNU6;Q8BWG8	Beta-arrestin-1	Arrb1	tr|F7DF62|F7DF62_MOUSE Beta-arrestin-1 (Fragment) OS=Mus musculus OX=10090 GN=Arrb1 PE=1 SV=1;tr|J3QNU6|J3QNU6_MOUSE Beta-arrestin-1 OS=Mus musculus OX=10090 GN=Arrb1 PE=1 SV=1;sp|Q8BWG8|ARRB1_MOUSE Beta-arrestin-1 OS=Mus musculus OX=10090 GN=Arrb1 PE=1 SV	3	1	1	1	0	0	1	0	0	5.8	5.8	13.252	121	121;419;418	0.0021739	5.7372	5.8	0	0	15383000	15383000	0	10570000	0
Q14BN8;Q9D9S3	Q14BN8;Q9D9S3	RWD domain-containing protein 2A	Rwdd2a	tr|Q14BN8|Q14BN8_MOUSE RWD domain-containing protein OS=Mus musculus OX=10090 GN=Rwdd2a PE=1 SV=1;sp|Q9D9S3|RWD2A_MOUSE RWD domain-containing protein 2A OS=Mus musculus OX=10090 GN=Rwdd2a PE=1 SV=1	2	1	1	0	1	0	0	1	0	7.9	7.9	33.816	292	292;292	0.0021692	5.7352	0	7.9	0	16268000	0	16268000	0	83587000
A0A171EBL2;A0A8I4P9C4;E9Q555	A0A171EBL2;A0A8I4P9C4;E9Q555	E3 ubiquitin-protein ligase RNF213	Rnf213	tr|A0A171EBL2|A0A171EBL2_MOUSE E3 ubiquitin-protein ligase RNF213 OS=Mus musculus OX=10090 GN=Rnf213 PE=1 SV=1;tr|A0A8I4P9C4|A0A8I4P9C4_MOUSE E3 ubiquitin-protein ligase RNF213 OS=Mus musculus OX=10090 GN=Rnf213 PE=4 SV=1;sp|E9Q555|RN213_MOUSE E3 ubiquitin	3	1	1	1	0	0	1	0	0	0.2	0.2	584.62	5151	5151;5152;5148	0.0021645	5.7327	0.2	0	0	0	0	0	0	0
Q8R3D1	Q8R3D1	TBC1 domain family member 13	Tbc1d13	sp|Q8R3D1|TBC13_MOUSE TBC1 domain family member 13 OS=Mus musculus OX=10090 GN=Tbc1d13 PE=1 SV=1	1	1	1	0	1	0	0	1	0	4	4	46.452	400	400	0.0021598	5.7316	0	4	0	2840900	0	2840900	0	14597000
D3Z036;O88543	D3Z036;O88543	COP9 signalosome complex subunit 3	Cops3	tr|D3Z036|D3Z036_MOUSE COP9 signalosome complex subunit 3 (Fragment) OS=Mus musculus OX=10090 GN=Cops3 PE=1 SV=1;sp|O88543|CSN3_MOUSE COP9 signalosome complex subunit 3 OS=Mus musculus OX=10090 GN=Cops3 PE=1 SV=3	2	1	1	0	1	0	0	1	0	6.6	6.6	11.465	106	106;423	0.0021552	5.7266	0	6.6	0	81045000	0	81045000	0	416420000
Q3UHC2	Q3UHC2	Leucine-rich repeat serine/threonine-protein kinase 1	Lrrk1	sp|Q3UHC2|LRRK1_MOUSE Leucine-rich repeat serine/threonine-protein kinase 1 OS=Mus musculus OX=10090 GN=Lrrk1 PE=1 SV=1	1	1	1	0	1	0	0	1	0	0.3	0.3	225.47	2014	2014	0.0021505	5.7245	0	0.3	0	4799500	0	4799500	0	24660000
F8WJG3;P62996	F8WJG3;P62996	Transformer-2 protein homolog beta	Tra2b	tr|F8WJG3|F8WJG3_MOUSE Transformer-2 protein homolog beta OS=Mus musculus OX=10090 GN=Tra2b PE=1 SV=1;sp|P62996|TRA2B_MOUSE Transformer-2 protein homolog beta OS=Mus musculus OX=10090 GN=Tra2b PE=1 SV=1	2	1	1	1	0	0	1	0	0	3.7	3.7	21.935	188	188;288	0.0021459	5.7237	3.7	0	0	5056600	5056600	0	5056600	0
D3Z7A7;E9PXE6;F8VPR2;A2AQW2;Q6ZPF4;A2APV2	D3Z7A7;E9PXE6;F8VPR2;A2AQW2;Q6ZPF4;A2APV2	Formin-like protein 3;Formin-like protein 2	Fmnl3;Fmnl2	tr|D3Z7A7|D3Z7A7_MOUSE Formin-like protein 3 OS=Mus musculus OX=10090 GN=Fmnl3 PE=1 SV=1;tr|E9PXE6|E9PXE6_MOUSE Formin-like protein 2 OS=Mus musculus OX=10090 GN=Fmnl2 PE=1 SV=2;tr|F8VPR2|F8VPR2_MOUSE Formin-like protein 2 OS=Mus musculus OX=10090 GN=Fmnl2	6	1	1	1	0	0	1	0	0	1.3	1.3	116.92	1027	1027;1034;1083;1085;1028;1086	0.0021413	5.7231	1.3	0	0	6421800	6421800	0	6421800	0
O88844	O88844	Isocitrate dehydrogenase [NADP] cytoplasmic	Idh1	sp|O88844|IDHC_MOUSE Isocitrate dehydrogenase [NADP] cytoplasmic OS=Mus musculus OX=10090 GN=Idh1 PE=1 SV=2	1	1	1	1	0	0	1	0	0	3.1	3.1	46.674	414	414	0.0021368	5.7231	3.1	0	0	2716900	2716900	0	2716900	0
A0A571BED3;A0A571BG73;Q3UY96	A0A571BED3;A0A571BG73;Q3UY96	Cilia- and flagella-associated protein 74	Cfap74	tr|A0A571BED3|A0A571BED3_MOUSE Cilia- and flagella-associated protein 74 OS=Mus musculus OX=10090 GN=Cfap74 PE=4 SV=1;tr|A0A571BG73|A0A571BG73_MOUSE Cilia- and flagella-associated protein 74 OS=Mus musculus OX=10090 GN=Cfap74 PE=4 SV=1;sp|Q3UY96|CFA74_MOUS	3	1	1	0	1	0	0	1	0	0.8	0.8	181.89	1605	1605;1623;1578	0.0021322	5.7212	0	0.8	0	10416000000	0	10416000000	0	53517000000
Q00623	Q00623	Apolipoprotein A-I;Proapolipoprotein A-I;Truncated apolipoprotein A-I	Apoa1	sp|Q00623|APOA1_MOUSE Apolipoprotein A-I OS=Mus musculus OX=10090 GN=Apoa1 PE=1 SV=2	1	1	1	1	0	0	1	0	0	4.2	4.2	30.615	264	264	0.0021277	5.7197	4.2	0	0	2357500	2357500	0	2357500	0
B0V2N8;B0V2N7;P07356	B0V2N8;B0V2N7;P07356	Annexin;Annexin A2	Anxa2	tr|B0V2N8|B0V2N8_MOUSE Annexin (Fragment) OS=Mus musculus OX=10090 GN=Anxa2 PE=1 SV=1;tr|B0V2N7|B0V2N7_MOUSE Annexin (Fragment) OS=Mus musculus OX=10090 GN=Anxa2 PE=1 SV=1;sp|P07356|ANXA2_MOUSE Annexin A2 OS=Mus musculus OX=10090 GN=Anxa2 PE=1 SV=2	3	1	1	1	0	0	1	0	0	5.1	5.1	19.596	176	176;196;339	0.0021231	5.7182	5.1	0	0	883880	883880	0	883880	0
A0A087WSE3;E9QQ25;Q62407	A0A087WSE3;E9QQ25;Q62407	Striated muscle-specific serine/threonine-protein kinase	Speg	tr|A0A087WSE3|A0A087WSE3_MOUSE Striated muscle-specific serine/threonine-protein kinase (Fragment) OS=Mus musculus OX=10090 GN=Speg PE=1 SV=1;tr|E9QQ25|E9QQ25_MOUSE Striated muscle-specific serine/threonine-protein kinase OS=Mus musculus OX=10090 GN=Speg P	3	1	1	0	1	0	0	1	0	0.4	0.4	328.32	3010	3010;3262;3262	0.0021186	5.7163	0	0.4	0	5375500	0	5375500	0	27620000
E9PXF7;D3Z6F0	E9PXF7;D3Z6F0		Gm14446	tr|E9PXF7|E9PXF7_MOUSE Interferon-induced protein with tetratricpeptide repeats 1B-like 1 OS=Mus musculus OX=10090 GN=Ifit1bl1 PE=1 SV=1;tr|D3Z6F0|D3Z6F0_MOUSE Interferon-induced protein with tetratricpeptide repeats 1B-like 1 OS=Mus musculus OX=10090 GN=I	2	1	1	0	1	0	0	1	0	3.4	3.4	54.477	470	470;470	0.0021142	5.7161	0	3.4	0	484160000	0	484160000	0	1682900000
Q9DB77	Q9DB77	Cytochrome b-c1 complex subunit 2, mitochondrial	Uqcrc2	sp|Q9DB77|QCR2_MOUSE Cytochrome b-c1 complex subunit 2, mitochondrial OS=Mus musculus OX=10090 GN=Uqcrc2 PE=1 SV=1	1	1	1	1	0	0	1	0	0	1.8	1.8	48.234	453	453	0.0021097	5.7134	1.8	0	0	3474200	3474200	0	3474200	0
Q62425	Q62425	Cytochrome c oxidase subunit NDUFA4	Ndufa4	sp|Q62425|NDUA4_MOUSE Cytochrome c oxidase subunit NDUFA4 OS=Mus musculus OX=10090 GN=Ndufa4 PE=1 SV=2	1	1	1	1	0	0	1	0	0	30.5	30.5	9.3267	82	82	0.0021053	5.7087	30.5	0	0	8166300	8166300	0	8166300	0
Q61098	Q61098	Interleukin-18 receptor 1	Il18r1	sp|Q61098|IL18R_MOUSE Interleukin-18 receptor 1 OS=Mus musculus OX=10090 GN=Il18r1 PE=1 SV=1	1	1	1	0	1	0	0	1	0	2.2	2.2	61.6	537	537	0.0021008	5.7081	0	2.2	0	1566700	0	1566700	0	8050100
B1ATP7;Q80Y81	B1ATP7;Q80Y81	Zinc phosphodiesterase ELAC protein 2	Elac2	tr|B1ATP7|B1ATP7_MOUSE Zinc phosphodiesterase ELAC protein 2 OS=Mus musculus OX=10090 GN=Elac2 PE=1 SV=1;sp|Q80Y81|RNZ2_MOUSE Zinc phosphodiesterase ELAC protein 2 OS=Mus musculus OX=10090 GN=Elac2 PE=1 SV=1	2	1	1	0	0	1	0	0	1	2.4	2.4	91.946	823	823;831	0.0020964	5.7071	0	0	2.4	79742	0	0	0	0
A0A494BAP1;A0A494BA90;A0A0N4SVQ3;Q9EQ44	A0A494BAP1;A0A494BA90;A0A0N4SVQ3;Q9EQ44	Vomeronasal type-1 receptor 41	Vmn1r41	tr|A0A494BAP1|A0A494BAP1_MOUSE Vomeronasal type-1 receptor OS=Mus musculus OX=10090 GN=Vmn1r239-ps PE=3 SV=1;tr|A0A494BA90|A0A494BA90_MOUSE Vomeronasal type-1 receptor OS=Mus musculus OX=10090 GN=Vmn1r239-ps PE=3 SV=1;tr|A0A0N4SVQ3|A0A0N4SVQ3_MOUSE Vomeron	4	1	1	1	0	0	1	0	0	7.4	7.4	35.227	310	310;311;311;310	0.0020921	5.6924	7.4	0	0	1197500	1197500	0	1197500	0
G5E846;A0A2R8W6R6;G3X981;P15331	G5E846;A0A2R8W6R6;G3X981;P15331	Peripherin	Prph	tr|G5E846|G5E846_MOUSE Peripherin OS=Mus musculus OX=10090 GN=Prph PE=1 SV=1;tr|A0A2R8W6R6|A0A2R8W6R6_MOUSE Peripherin OS=Mus musculus OX=10090 GN=Prph PE=1 SV=1;tr|G3X981|G3X981_MOUSE Peripherin OS=Mus musculus OX=10090 GN=Prph PE=1 SV=1;sp|P15331|PERI_MO	4	1	1	1	0	0	1	0	0	4.2	4.2	54.297	475	475;506;507;475	0.0020877	5.6909	4.2	0	0	473260	473260	0	473260	0
A0A0R4J080;Q62130	A0A0R4J080;Q62130	Tyrosine-protein phosphatase non-receptor type 14	Ptpn14	tr|A0A0R4J080|A0A0R4J080_MOUSE Tyrosine-protein phosphatase non-receptor type OS=Mus musculus OX=10090 GN=Ptpn14 PE=1 SV=1;sp|Q62130|PTN14_MOUSE Tyrosine-protein phosphatase non-receptor type 14 OS=Mus musculus OX=10090 GN=Ptpn14 PE=1 SV=2	2	1	1	1	0	0	1	0	0	2.4	2.4	97.666	849	849;1189	0.0020833	5.6891	2.4	0	0	177910	177910	0	177910	0
B2RWE8;Q8BGD9	B2RWE8;Q8BGD9	Eukaryotic translation initiation factor 4B	Eif4b	tr|B2RWE8|B2RWE8_MOUSE Eif4b protein OS=Mus musculus OX=10090 GN=Eif4b PE=1 SV=1;sp|Q8BGD9|IF4B_MOUSE Eukaryotic translation initiation factor 4B OS=Mus musculus OX=10090 GN=Eif4b PE=1 SV=1	2	1	1	1	0	0	1	0	0	4	4	46.478	403	403;611	0.002079	5.6882	4	0	0	0	0	0	0	0
Q8C0J6	Q8C0J6	Ankyrin repeat domain-containing protein SOWAHC	Sowahc	sp|Q8C0J6|SWAHC_MOUSE Ankyrin repeat domain-containing protein SOWAHC OS=Mus musculus OX=10090 GN=Sowahc PE=1 SV=2	1	1	1	0	1	0	0	1	0	2.3	2.3	54.937	512	512	0.0020747	5.6863	0	2.3	0	1625200	0	1625200	0	8350200
D3YYW8;Q91V81	D3YYW8;Q91V81	RNA-binding protein 42	Rbm42	tr|D3YYW8|D3YYW8_MOUSE RNA-binding protein 42 OS=Mus musculus OX=10090 GN=Rbm42 PE=1 SV=1;sp|Q91V81|RBM42_MOUSE RNA-binding protein 42 OS=Mus musculus OX=10090 GN=Rbm42 PE=1 SV=2	2	1	1	1	0	0	1	0	0	3.3	3.3	47.214	449	449;478	0.0020704	5.6857	3.3	0	0	2335100	2335100	0	2335100	0
Q91Z96	Q91Z96	BMP-2-inducible protein kinase	Bmp2k	sp|Q91Z96|BMP2K_MOUSE BMP-2-inducible protein kinase OS=Mus musculus OX=10090 GN=Bmp2k PE=1 SV=1	1	1	1	1	0	0	1	0	0	1.3	1.3	126.18	1138	1138	0.0020661	5.6855	1.3	0	0	0	0	0	0	0
E9PVM7;P48774;E9Q5L9;E9Q024	E9PVM7;P48774;E9Q5L9;E9Q024	Glutathione S-transferase Mu 5	Gstm5	tr|E9PVM7|E9PVM7_MOUSE Glutathione S-transferase (Fragment) OS=Mus musculus OX=10090 GN=Gstm5 PE=1 SV=1;sp|P48774|GSTM5_MOUSE Glutathione S-transferase Mu 5 OS=Mus musculus OX=10090 GN=Gstm5 PE=1 SV=1;tr|E9Q5L9|E9Q5L9_MOUSE Glutathione S-transferase Mu 5 O	4	3	1	3	0	0	1	0	0	14	6.5	25.504	215	215;224;69;73	0.0020619	5.6835	14	0	0	9633100	9633100	0	9633100	0
Q8R0F5	Q8R0F5	RNA-binding motif protein, X-linked 2	Rbmx2	sp|Q8R0F5|RBMX2_MOUSE RNA-binding motif protein, X-linked 2 OS=Mus musculus OX=10090 GN=Rbmx2 PE=1 SV=1	1	1	1	0	1	0	0	1	0	2.5	2.5	37.535	326	326	0.0020576	5.6813	0	2.5	0	51424000	0	51424000	0	264220000
A0A1L1SQX6;A0A1L1SV46;Q8BM13	A0A1L1SQX6;A0A1L1SV46;Q8BM13	Noelin-2	Olfm2	tr|A0A1L1SQX6|A0A1L1SQX6_MOUSE Noelin-2 OS=Mus musculus OX=10090 GN=Olfm2 PE=1 SV=1;tr|A0A1L1SV46|A0A1L1SV46_MOUSE Noelin-2 OS=Mus musculus OX=10090 GN=Olfm2 PE=1 SV=1;sp|Q8BM13|NOE2_MOUSE Noelin-2 OS=Mus musculus OX=10090 GN=Olfm2 PE=1 SV=2	3	1	1	0	1	0	0	1	0	1.5	1.5	51.68	456	456;478;448	0.0020534	5.6782	0	1.5	0	11907000	0	11907000	0	61178000
B1AYY3;F6QNG5;Q8K3H5	B1AYY3;F6QNG5;Q8K3H5	Myosin-IIIa	Myo3a	tr|B1AYY3|B1AYY3_MOUSE Myosin-IIIa (Fragment) OS=Mus musculus OX=10090 GN=Myo3a PE=3 SV=1;tr|F6QNG5|F6QNG5_MOUSE Myosin-IIIa OS=Mus musculus OX=10090 GN=Myo3a PE=3 SV=2;sp|Q8K3H5|MYO3A_MOUSE Myosin-IIIa OS=Mus musculus OX=10090 GN=Myo3a PE=1 SV=1	3	1	1	0	1	0	0	1	0	2.7	2.7	85.15	753	753;1621;1613	0.0020492	5.676	0	2.7	0	507580	0	507580	0	2608000
Q922W6;O55123;P28862	Q922W6;O55123;P28862	Stromelysin-2;Stromelysin-1	Mmp3;Mmp10	tr|Q922W6|Q922W6_MOUSE Matrix metallopeptidase 3 OS=Mus musculus OX=10090 GN=Mmp3 PE=1 SV=1;sp|O55123|MMP10_MOUSE Stromelysin-2 OS=Mus musculus OX=10090 GN=Mmp10 PE=2 SV=1;sp|P28862|MMP3_MOUSE Stromelysin-1 OS=Mus musculus OX=10090 GN=Mmp3 PE=2 SV=2	3	1	1	1	0	0	1	0	0	4	4	54.104	479	479;476;477	0.002045	5.6759	4	0	0	23407000	23407000	0	23407000	0
Q9CZU3	Q9CZU3	Superkiller viralicidic activity 2-like 2	Skiv2l2	sp|Q9CZU3|MTREX_MOUSE Exosome RNA helicase MTR4 OS=Mus musculus OX=10090 GN=Mtrex PE=1 SV=1	1	1	1	1	0	0	1	0	0	1.6	1.6	117.64	1040	1040	0.0020408	5.6726	1.6	0	0	1317700	1317700	0	1317700	0
Q8CJ53	Q8CJ53	Cdc42-interacting protein 4	Trip10	sp|Q8CJ53|CIP4_MOUSE Cdc42-interacting protein 4 OS=Mus musculus OX=10090 GN=Trip10 PE=1 SV=2	1	1	1	1	0	0	1	0	0	1.7	1.7	68.489	603	603	0.0020367	5.6687	1.7	0	0	1661100	1661100	0	1661100	0
E9QAK5;P28738;Q61768;P33175	E9QAK5;P28738;Q61768;P33175	Kinesin-like protein;Kinesin heavy chain isoform 5C;Kinesin-1 heavy chain;Kinesin heavy chain isoform 5A	Kif5b;Kif5c;Kif5a	tr|E9QAK5|E9QAK5_MOUSE Kinesin-like protein (Fragment) OS=Mus musculus OX=10090 GN=Kif5b PE=1 SV=1;sp|P28738|KIF5C_MOUSE Kinesin heavy chain isoform 5C OS=Mus musculus OX=10090 GN=Kif5c PE=1 SV=3;sp|Q61768|KINH_MOUSE Kinesin-1 heavy chain OS=Mus musculus O	4	1	1	1	0	0	1	0	0	1.8	1.8	70.102	619	619;956;963;1027	0.0020325	5.6682	1.8	0	0	15356000	15356000	0	15356000	0
Q8CJ40	Q8CJ40	Rootletin	Crocc	sp|Q8CJ40|CROCC_MOUSE Rootletin OS=Mus musculus OX=10090 GN=Crocc PE=1 SV=2	1	1	1	0	1	0	0	1	0	0.9	0.9	226.94	2009	2009	0.0020284	5.6678	0	0.9	0	340610	0	340610	0	1750100
P62631	P62631	Elongation factor 1-alpha 2	Eef1a2	sp|P62631|EF1A2_MOUSE Elongation factor 1-alpha 2 OS=Mus musculus OX=10090 GN=Eef1a2 PE=1 SV=1	1	6	1	6	1	0	1	0	0	14.3	3	50.454	463	463	0.0020243	5.6673	14.3	2.4	0	0	0	0	0	0
A0A2R8VJX4;Q3UGP8	A0A2R8VJX4;Q3UGP8	Putative Dol-P-Glc:Glc(2)Man(9)GlcNAc(2)-PP-Dol alpha-1,2-glucosyltransferase	Alg10b	tr|A0A2R8VJX4|A0A2R8VJX4_MOUSE Dolichyl-P-Glc:Glc(2)Man(9)GlcNAc(2)-PP-dolichol alpha-1,2-glucosyltransferase OS=Mus musculus OX=10090 GN=Alg10b PE=1 SV=1;sp|Q3UGP8|AG10B_MOUSE Putative Dol-P-Glc:Glc(2)Man(9)GlcNAc(2)-PP-Dol alpha-1,2-glucosyltransferase O	2	1	1	1	0	0	1	0	0	12.2	12.2	17.895	156	156;474	0.0020202	5.6667	12.2	0	0	5705600	5705600	0	5705600	0
F6UFI2;A0A2K6EDL8;Q923P0	F6UFI2;A0A2K6EDL8;Q923P0	Collagen alpha-1(XX) chain	Col20a1	tr|F6UFI2|F6UFI2_MOUSE Collagen alpha-1(XX) chain OS=Mus musculus OX=10090 GN=Col20a1 PE=1 SV=2;tr|A0A2K6EDL8|A0A2K6EDL8_MOUSE Collagen alpha-1(XX) chain OS=Mus musculus OX=10090 GN=Col20a1 PE=1 SV=1;sp|Q923P0|COKA1_MOUSE Collagen alpha-1(XX) chain OS=Mus	3	1	1	0	1	0	0	1	0	0.6	0.6	137.97	1288	1288;1362;1320	0.0020161	5.6653	0	0.6	0	7491600	0	7491600	0	38492000
Q3TIX9	Q3TIX9	U4/U6.U5 tri-snRNP-associated protein 2	Usp39	sp|Q3TIX9|SNUT2_MOUSE U4/U6.U5 tri-snRNP-associated protein 2 OS=Mus musculus OX=10090 GN=Usp39 PE=1 SV=2	1	1	1	1	0	0	1	0	0	2	2	65.146	564	564	0.0020121	5.6651	2	0	0	3229600	3229600	0	3229600	0
P70698	P70698	CTP synthase 1	Ctps1	sp|P70698|PYRG1_MOUSE CTP synthase 1 OS=Mus musculus OX=10090 GN=Ctps1 PE=1 SV=2	1	1	1	1	0	0	1	0	0	2	2	66.682	591	591	0.002008	5.6617	2	0	0	13476000	13476000	0	13476000	0
F6ZBL2;Q80SY4	F6ZBL2;Q80SY4	E3 ubiquitin-protein ligase MIB1	Mib1	tr|F6ZBL2|F6ZBL2_MOUSE RING-type E3 ubiquitin transferase (Fragment) OS=Mus musculus OX=10090 GN=Mib1 PE=1 SV=1;sp|Q80SY4|MIB1_MOUSE E3 ubiquitin-protein ligase MIB1 OS=Mus musculus OX=10090 GN=Mib1 PE=1 SV=1	2	1	1	0	1	0	0	1	0	2.7	2.7	69.637	641	641;1006	0.002004	5.6589	0	2.7	0	8104600	0	8104600	0	41642000
P29594	P29594	Caspase-2;Caspase-2 subunit p18;Caspase-2 subunit p13;Caspase-2 subunit p12	Casp2	sp|P29594|CASP2_MOUSE Caspase-2 OS=Mus musculus OX=10090 GN=Casp2 PE=1 SV=5	1	1	1	0	1	0	0	1	0	4.2	4.2	50.66	452	452	0.002	5.6578	0	4.2	0	775540	0	775540	0	3984800
Q9R118	Q9R118	Serine protease HTRA1	Htra1	sp|Q9R118|HTRA1_MOUSE Serine protease HTRA1 OS=Mus musculus OX=10090 GN=Htra1 PE=1 SV=2	1	1	1	1	0	0	1	0	0	2.7	2.7	51.213	480	480	0.001996	5.6549	2.7	0	0	3563700	3563700	0	3563700	0
A0A1B0GRR3;A0A1B0GSE8;P62281	A0A1B0GRR3;A0A1B0GSE8;P62281	40S ribosomal protein S11	Rps11	tr|A0A1B0GRR3|A0A1B0GRR3_MOUSE 40S ribosomal protein S11 OS=Mus musculus OX=10090 GN=Rps11 PE=1 SV=1;tr|A0A1B0GSE8|A0A1B0GSE8_MOUSE 40S ribosomal protein S11 (Fragment) OS=Mus musculus OX=10090 GN=Rps11 PE=1 SV=1;sp|P62281|RS11_MOUSE 40S ribosomal protein	3	1	1	1	0	0	1	0	0	10	10	15.198	130	130;135;158	0.001992	5.6546	10	0	0	7495700	7495700	0	7495700	0
O55134	O55134	Protocadherin-12	Pcdh12	sp|O55134|PCD12_MOUSE Protocadherin-12 OS=Mus musculus OX=10090 GN=Pcdh12 PE=1 SV=2	1	1	1	0	1	0	0	1	0	0.6	0.6	128.67	1180	1180	0.0019881	5.6545	0	0.6	0	7104900	0	7104900	0	36506000
A0A140LIV4;F6YMQ0;F6Z0V3;Q3UVV9	A0A140LIV4;F6YMQ0;F6Z0V3;Q3UVV9	von Willebrand factor A domain-containing protein 3A	Vwa3a	tr|A0A140LIV4|A0A140LIV4_MOUSE von Willebrand factor A domain-containing protein 3A (Fragment) OS=Mus musculus OX=10090 GN=Vwa3a PE=4 SV=1;tr|F6YMQ0|F6YMQ0_MOUSE von Willebrand factor A domain-containing protein 3A (Fragment) OS=Mus musculus OX=10090 GN=Vw	4	1	1	1	0	0	1	0	0	9	9	9.8615	89	89;159;197;1148	0.0019841	5.6533	9	0	0	1578400	1578400	0	1578400	0
Q9ET77	Q9ET77	Junctophilin-3	Jph3	sp|Q9ET77|JPH3_MOUSE Junctophilin-3 OS=Mus musculus OX=10090 GN=Jph3 PE=1 SV=1	1	1	1	0	1	0	0	1	0	1.9	1.9	81.228	744	744	0.0019763	5.6512	0	1.9	0	70927000	0	70927000	0	364430000
A0A0R4J1H6;E9QP99;P55937	A0A0R4J1H6;E9QP99;P55937	Golgin subfamily A member 3	Golga3	tr|A0A0R4J1H6|A0A0R4J1H6_MOUSE Golgin subfamily A member 3 OS=Mus musculus OX=10090 GN=Golga3 PE=1 SV=1;tr|E9QP99|E9QP99_MOUSE Golgin subfamily A member 3 OS=Mus musculus OX=10090 GN=Golga3 PE=1 SV=1;sp|P55937|GOGA3_MOUSE Golgin subfamily A member 3 OS=Mus	3	1	1	0	1	0	0	1	0	0.9	0.9	162.89	1447	1447;1487;1487	0.0019802	5.6512	0	0.9	0	840830	0	840830	0	4320300
Q8CHP0	Q8CHP0	Zinc finger CCCH domain-containing protein 3	Zc3h3	sp|Q8CHP0|ZC3H3_MOUSE Zinc finger CCCH domain-containing protein 3 OS=Mus musculus OX=10090 GN=Zc3h3 PE=1 SV=1	1	1	1	1	0	0	1	0	0	0.6	0.6	103.22	950	950	0.0019685	5.6509	0.6	0	0	0	0	0	0	0
G3UZ73	G3UZ73		Cobl	tr|G3UZ73|G3UZ73_MOUSE Protein cordon-bleu OS=Mus musculus OX=10090 GN=Cobl PE=1 SV=1	1	1	1	0	1	0	0	1	0	1.5	1.5	45.623	410	410	0.0019724	5.6509	0	1.5	0	0	0	0	0	0
Q8BVR0	Q8BVR0	Barrier-to-autointegration factor-like protein	Banf2	sp|Q8BVR0|BAFL_MOUSE Barrier-to-autointegration factor-like protein OS=Mus musculus OX=10090 GN=Banf2 PE=1 SV=1	1	1	1	0	1	0	0	1	0	14.4	14.4	10.267	90	90	0.0039293	5.6483	0	14.4	0	40813000	0	40813000	0	209700000
Q8BHJ6	Q8BHJ6	Serine incorporator 5	Serinc5	sp|Q8BHJ6|SERC5_MOUSE Serine incorporator 5 OS=Mus musculus OX=10090 GN=Serinc5 PE=2 SV=1	1	1	1	1	0	0	1	0	0	4.3	4.3	51.831	461	461	0.0039216	5.6449	4.3	0	0	5869900	5869900	0	5869900	0
Q3LAC4	Q3LAC4	Phosphatidylinositol 3,4,5-trisphosphate-dependent Rac exchanger 2 protein	Prex2	sp|Q3LAC4|PREX2_MOUSE Phosphatidylinositol 3,4,5-trisphosphate-dependent Rac exchanger 2 protein OS=Mus musculus OX=10090 GN=Prex2 PE=1 SV=2	1	1	1	0	1	0	0	1	0	0.9	0.9	181.72	1598	1598	0.0039139	5.6443	0	0.9	0	1120200	0	1120200	0	5755700
A0A1D5RLI4;D6RGQ8;E9Q0A3;Q68FM7	A0A1D5RLI4;D6RGQ8;E9Q0A3;Q68FM7		Arhgef11	tr|A0A1D5RLI4|A0A1D5RLI4_MOUSE Rho guanine nucleotide exchange factor (GEF) 11 (Fragment) OS=Mus musculus OX=10090 GN=Arhgef11 PE=1 SV=1;tr|D6RGQ8|D6RGQ8_MOUSE Rho guanine nucleotide exchange factor (GEF) 11 OS=Mus musculus OX=10090 GN=Arhgef11 PE=1 SV=1;t	4	1	1	1	0	0	1	0	0	9.8	9.8	22.006	205	205;608;1475;1552	0.0039062	5.6441	9.8	0	0	704690	704690	0	704690	0
E0CXD7;E0CY33;E0CYK7;A0A140LHX4;A0A140LIB4;E9PWI9;Q8BZL8;Q924W9	E0CXD7;E0CY33;E0CYK7;A0A140LHX4;A0A140LIB4;E9PWI9;Q8BZL8;Q924W9	LIM domain only protein 3;Rhombotin-1	Lmo3;Lmo1	tr|E0CXD7|E0CXD7_MOUSE LIM domain only protein 3 OS=Mus musculus OX=10090 GN=Lmo3 PE=4 SV=1;tr|E0CY33|E0CY33_MOUSE LIM domain only protein 3 (Fragment) OS=Mus musculus OX=10090 GN=Lmo3 PE=4 SV=1;tr|E0CYK7|E0CYK7_MOUSE LIM domain only protein 3 (Fragment) O	8	1	1	0	1	0	0	1	0	25	25	6.8651	60	60;68;108;145;155;156;145;156	0.0038986	5.6427	0	25	0	737060	0	737060	0	3787100
F6TQ80;Q8R3P7	F6TQ80;Q8R3P7	Clusterin-associated protein 1	Cluap1	tr|F6TQ80|F6TQ80_MOUSE Clusterin-associated protein 1 OS=Mus musculus OX=10090 GN=Cluap1 PE=4 SV=1;sp|Q8R3P7|CLUA1_MOUSE Clusterin-associated protein 1 OS=Mus musculus OX=10090 GN=Cluap1 PE=1 SV=1	2	1	1	0	1	0	0	1	0	8.2	8.2	9.4215	85	85;413	0.0038911	5.6426	0	8.2	0	7011400	0	7011400	0	36025000
Q8K0A8;P27664	Q8K0A8;P27664	Rod cGMP-specific 3,5-cyclic phosphodiesterase subunit alpha	Pde6a	tr|Q8K0A8|Q8K0A8_MOUSE Phosphodiesterase OS=Mus musculus OX=10090 GN=Pde6a PE=1 SV=1;sp|P27664|PDE6A_MOUSE Rod cGMP-specific 3,5-cyclic phosphodiesterase subunit alpha OS=Mus musculus OX=10090 GN=Pde6a PE=2 SV=3	2	1	1	1	0	0	1	0	0	2.1	2.1	99.543	860	860;859	0.0038835	5.6423	2.1	0	0	90204	90204	0	90204	0
